# Supplementary material for: A computational triage approach to the synthesis of novel difluorocyclopentenes and fluorinated cycloheptadienes using thermal rearrangements
Source: PubMed Central journal article supplement (PMC5355944; doi:10.1039/c6sc01289b), 2016-06-16
Supplement: SC-007-c6sc01289b-s001.pdf [file SC-007-c6sc01289b-s001.pdf]

# A Computational Triage Approach into the Synthesis of Novel Difluorocyclopentenes and Fluorinated Heptadienes using Thermal Rearrangements

David Orr, Prof. Dr. Jonathan. M. Percy, and Dr. Zoë A. Harrison

## Supporting Information

|                                                                                                  |             |
|--------------------------------------------------------------------------------------------------|-------------|
| <b>General Experimental</b>                                                                      | <b>S1</b>   |
| <b>Computational Methodology</b>                                                                 | <b>S3</b>   |
| <b>Computational Triage Discussion</b>                                                           | <b>S4</b>   |
| Hammett Plot Data                                                                                | <b>S4</b>   |
| Radical Stabilising Effects                                                                      | <b>S6</b>   |
| Computational Searches involving Phenolate <b>S7</b>                                             | <b>S8</b>   |
| Regioselectivity with Heteroarene Precursors                                                     | <b>S9</b>   |
| <b>Synthetic Procedures</b>                                                                      | <b>S10</b>  |
| General Procedure A: Synthesis of Alkenoates from Aldehydes                                      | <b>S10</b>  |
| General Procedure B: Difluorocyclopropanation of Alkenoates                                      | <b>S16</b>  |
| General Procedure C: Reduction of Difluorocyclopropyl Esters                                     | <b>S21</b>  |
| General Procedure D: Tandem Oxidation/Olefination of Alcohols                                    | <b>S25</b>  |
| General Procedure E: Thermal Rearrangement of VCP                                                | <b>S34</b>  |
| <b>Characterisation Spectra</b>                                                                  | <b>S41</b>  |
| <b>Difluorocyclopropanation Optimisation</b>                                                     | <b>S132</b> |
| NMR Evidence of Decomposition of Furyl Vinyl Acetate <b>14a</b>                                  | <b>S133</b> |
| Difluorocyclopropanation of Ethyl Cinnamate with TFDA                                            | <b>S134</b> |
| Evidence of Difluorocarbene-Diglyme Reaction                                                     | <b>S142</b> |
| Plot of Conversion vs HOMO Energies                                                              | <b>S143</b> |
| Functional Group Tolerance: Additive Experiment                                                  | <b>S145</b> |
| <b>Crude Spectra for Low Temperature Rearrangement Precursors</b>                                | <b>S148</b> |
| <b>Rearrangement of Isolated VCP Precursors – Crude Spectra</b>                                  | <b>S155</b> |
| <b>Piperonyl <b>22a</b> Rearrangement: Kinetic Modelling</b>                                     | <b>S162</b> |
| VT <sup>19</sup> F NMR Procedure for Piperonyl <b>22a</b>                                        | <b>S162</b> |
| Raw Kinetic Data for Piperonyl <b>22a</b>                                                        | <b>S164</b> |
| Rearrangement Reaction Profiles for <b>22a</b> (343-373 K)                                       | <b>S168</b> |
| NMR Simulation                                                                                   | <b>S169</b> |
| Arrhenius Plot for Piperonyl <b>22a</b>                                                          | <b>S173</b> |
| <b>Computational Methodology Refinement</b>                                                      | <b>S176</b> |
| Identification of the most appropriate Method for Electronic Structure Calculations: an Overview | <b>S176</b> |
| Basis Set Effect on <b>22a</b> VCPR Activation Energies                                          | <b>S182</b> |
| Method Screening for VCPR                                                                        | <b>S183</b> |
| Assessment of Solvent Effects                                                                    | <b>S184</b> |
| Investigations into Alternative [3,3]-Diradical/Triplet Pathways                                 | <b>S186</b> |
| Arrhenius Plot for divinyl-difluorocyclopropane <b>49</b>                                        | <b>S188</b> |
| [3,3]-Sigmatropic Computational Methodology Screening                                            | <b>S189</b> |
| Error Associated with T1 and G3(MP2) Calculations                                                | <b>S193</b> |
| Raw Data for Isodesmic Reactions                                                                 | <b>S194</b> |
| <b>Free Energy Values for Computational Predictions</b>                                          | <b>S196</b> |
| <b>VCPR Temperature Predictions</b>                                                              | <b>S197</b> |
| <b>References</b>                                                                                | <b>S198</b> |
| <b>Cartesian Coordinates</b>                                                                     | <b>S200</b> |
| Triage: Cyclopropane Substitution and Alkene Substitution                                        | <b>S200</b> |
| Other Synthesised VCP Precursors                                                                 | <b>S246</b> |
| Isodesmic Compounds                                                                              | <b>S255</b> |
| Remaining Species for Prediction Work                                                            | <b>S260</b> |

|                                  |      |
|----------------------------------|------|
| Literature Prediction            | S277 |
| Supporting Information Compounds | S287 |

## General Experimental

NMR spectra were recorded on Bruker DPX-400, AV-500 Avance-II+ 600 spectrometers.  $^1\text{H}$ ,  $^{19}\text{F}$  and  $^{13}\text{C}$  NMR spectra were recorded using the deuterated solvent as the lock and the residual solvent as the internal reference. The multiplicities of the spectroscopic data are presented in the following manner: s = singlet, d = doublet, dd = double doublet, ddd = doublet of double doublets, etc up to ddddd, dt = doublet of triplets, ddt = doublet of double triplet, dddt = doublet of double double triplet, dq = doublet of quartet; t = triplet, td = triple doublet; tt = triple triplet, q = quartet, ABq = AB system quartet, m = multiplet and br. = broad. Unless stated otherwise, all couplings refer to  $^3J$  homocouplings. All  $^1\text{H}$  spectra are fully assigned as much as possible. Relevant 2D-NMR spectra are supplied to confirm assignment.

IR spectra were recorded on a Shimadzu IRAffinity-1 FT-IR Spectrophotometer using a MIRacle™ Single Reflection Horizontal ATR Accessory.

GC/MS spectra were obtained on an Agilent 7890A GC System fitted with a DB5-type column (30 m  $\times$  0.25  $\mu\text{m}$ ) running a 40–320  $^\circ\text{C}$  temperature program, ramp rate 20  $^\circ\text{C min}^{-1}$  with helium carrier gas flow at 1  $\text{cm}^3 \text{min}^{-1}$ . Chemical ionisation (CI) (methane) mass spectra were recorded on an Agilent Technologies 5975C mass spectrometer.

HRMS measurements were obtained from a Waters GCT Premier MS (CI-MS), Finnigan MAT 95 XP (EI-MS and/or APCI-MS) or Thermo Scientific LTQ Orbitrap XL via Advion TriVersa NanoMate infusion (NSI-ES) spectrometers (EPSRC National Mass Spectrometry Service Centre, Swansea).

Melting points were recorded on a Griffin melting point apparatus and are uncorrected.

Thin layer chromatography was performed on pre-coated aluminium-backed silica gel plates (E.Merck, A.G.Darmstadt, Germany. Silica gel 60 F254, thickness 0.2 mm). Visualisation was achieved using potassium permanganate or UV detection at 254 nm. Column

chromatography was performed on silica gel (Zeochem, Zeoprep 60 HYD, 40-63  $\mu\text{m}$ ) using a Büchi Sepacore system. Hexane was distilled before chromatography.

Preparative HPLC was performed using Grace Reveleris PREP purification system with a Kromasil 100-10-C18 column (L = 250 mm, ID = 200 mm). Compound was loaded in a minimum volume of 1:1 DMSO:MeOH in a 5 mL sample loop. Flow rates varied depending on separation (5-30 ml/min) and peaks determined using ELSD and UV detection.

Commercial furfural (black) was percolated through a pad of alumina to afford an orange solution which was used immediately in reactions. 2-Formyl-pyrrole-1-carboxylic acid tert-butyl ester **12f** was synthesised from NaH and Boc anhydride using conditions described by Carreira and co-workers.<sup>S1</sup> 2-thiazolyl-carboxaldehyde **12g** was synthesised from thiazole, BuLi and DMF using conditions described by Glorius and co-workers.<sup>S2</sup> Due to the volatility of the aldehyde, crude product was used directly in subsequent Wittig olefinations.

Diglyme was distilled from  $\text{CaH}_2$  (60 °C/23 mbar) and stored under nitrogen over  $\text{CaH}_2$ . Trimethylsilyl chloride was distilled from  $\text{CaH}_2$  (60 °C/430 mbar) and stored under nitrogen over  $\text{CaH}_2$  in the refrigerator. Methyl 2,2-difluoro-2-(fluorosulfonyl)acetate (MDFA) and trimethylsilyl 2,2-difluoro-2-(fluorosulfonyl)acetate (TFDA) were purchased from Fluorochem and stored under a headspace of nitrogen. Potassium iodide (Sigma Aldrich) and magnesium sulfate ( $\text{MgSO}_4$ , VWR Chemicals) were dried in the oven (150 °C) before use. DCM (for tandem oxidation/olefination, acetylation and cyclopropanation reactions) and toluene (for reduction reactions) were dried using a PureSolv system from Innovative Technology, Inc..

All other chemicals were purchased from Sigma Aldrich, Apollo Scientific, Alfa Aesar, or Fluorochem and used as received.

## Computational Methodology

Structures were built in Spartan'10 using previously published compounds as models and geometry optimisation calculations were carried out for all closed shell compounds. For known diradical compounds unrestricted methodology was invoked using the keywords MIX and SCF=UNRESTRICTED, with CONVERGE deprecated. In cases where SCF convergence was difficult, the keyword NODIIS was used. All calculations were performed *in vacuo*. Spartan'10 was run on a Dell Precision T7500 (2 x Intel E5530 processors, four cores each, 2.40 GHz) with 24 GB RAM Debian GNU/Linux 5.

The calculation methods used in Spartan have been documented in: Y. Shao, L.F. Molnar, Y. Jung, J. Kussmann, C. Ochsenfeld, S.T. Brown, A.T.B. Gilbert, L.V. Slipchenko, S.V. Levchenko, D.P. O'Neill, R.A. DiStasio Jr., R.C. Lochan, T. Wang, G.J.O. Beran, N.A. Besley, J.M. Herbert, C.Y. Lin, T. Van Voorhis, S.H. Chien, A. Sodt, R.P. Steele, V.A. Rassolov, P.E. Maslen, P.P. Korambath, R.D. Adamson, B. Austin, J. Baker, E.F.C. Byrd, H. Dachsel, R.J. Doerksen, A. Dreuw, B.D. Dunietz, A.D. Dutoi, T.R. Furlani, S.R. Gwaltney, A. Heyden, S. Hirata, C-P. Hsu, G. Kedziora, R.Z. Khalliulin, P. Klunzinger, A.M. Lee, M.S. Lee, W.Z. Liang, I. Lotan, N. Nair, B. Peters, E.I. Proynov, P.A. Pieniazek, Y.M. Rhee, J. Ritchie, E. Rosta, C.D. Sherrill, A.C. Simmonett, J.E. Subotnik, H.L. Woodcock III, W. Zhang, A.T. Bell, A.K. Chakraborty, D.M. Chipman, F.J. Keil, A. Warshel, W.J. Hehre, H.F. Schaefer, J. Kong, A.I. Krylov, P.M.W. Gill and M. Head-Gordon, *Phys. Chem. Chem. Phys.*, **2006**, *8*, 3172.

Full reference for the Gaussian09 programme: Gaussian 09, Revision A.1, Frisch, M. J.; Trucks, G. W.; Schlegel, H. B.; Scuseria, G. E.; Robb, M. A.; Cheeseman, J. R.; Scalmani, G.; Barone, V.; Mennucci, B.; Petersson, G. A.; Nakatsuji, H.; Caricato, M.; Li, X.; Hratchian, H. P.; Izmaylov, A. F.; Bloino, J.; Zheng, G.; Sonnenberg, J. L.; Hada, M.; Ehara, M.; Toyota, K.; Fukuda, R.; Hasegawa, J.; Ishida, M.; Nakajima, T.; Honda, Y.; Kitao, O.; Nakai, H.; Vreven, T.; Montgomery, Jr., J. A.; Peralta, J. E.; Ogliaro, F.; Bearpark, M.; Heyd, J. J.; Brothers, E.; Kudin, K. N.; Staroverov, V. N.; Kobayashi, R.; Normand, J.; Raghavachari, K.; Rendell, A.; Burant, J. C.; Iyengar, S. S.; Tomasi, J.; Cossi, M.; Rega, N.; Millam, N. J.; Klene, M.; Knox, J. E.; Cross, J. B.; Bakken, V.; Adamo, C.; Jaramillo, J.; Gomperts, R.; Stratmann, R. E.; Yazyev, O.; Austin, A. J.; Cammi, R.; Pomelli, C.; Ochterski, J. W.; Martin, R. L.; Morokuma, K.; Zakrzewski, V. G.; Voth, G. A.; Salvador, P.; Dannenberg, J. J.; Dapprich, S.; Daniels, A. D.; Farkas, Ö.; Foresman, J. B.; Ortiz, J. V.; Cioslowski, J.; Fox, D. J. Gaussian, Inc., Wallingford CT, **2009**.



## Hammett Plot Data

The lower activation energy calculated for the more electron rich phenyl-substituted **9f** ( $-2.3 \text{ kcal mol}^{-1}$ ) prompted further investigations into the electronic effects of phenyl ring substitution. The VCPR activation energies for a range of precursors with electron-donating and -withdrawing groups were assessed (**Table S1**), focusing solely on *para*-substituents, since these show the greatest effects for resonance stabilisation of benzylic radicals. Substrates containing electron-donating groups were predicted to undergo faster rearrangement (**Table S1**, Entries 1-6) than unsubstituted **9j** (**Table S1**, Entry 7), whereas substrates bearing electron-withdrawing groups only showed a modest increase in activation energy (**Table S1**, Entries 8-12). The Hammett plot<sup>S3</sup> (**Figure S1**) constructed from this data gave an extremely low  $\rho$  value of 0.05 and supported a radical mechanism. A variety of free radical substituent constants ( $\sigma^\bullet$ ) have been reported in the literature<sup>S4-7</sup> but only those reported by Creary and co-workers ( $\sigma_c^\bullet$ ) are applicable to the more commonly used substituents.<sup>S8</sup> Our calculated activation energies correlated poorly when  $\sigma_c^\bullet$  constants were used ( $R^2 = 0.4259$ ) but still gave a  $\rho$  value close to zero (**Figure S1**). The relatively small increases in activation barriers, suggest that even substrates bearing electron-deficient phenyl rings should undergo VCPR at or close to 100 °C.

Both Hammett plots were generated using Excel from calculated free energies of activation ((U)B3LYP/6-31G\*, gas phase, 298 K,  $\text{kcal mol}^{-1}$ ) manipulated into  $\log(\Delta G^\ddagger(X)/\Delta G^\ddagger(H))$  values and literature  $\sigma$  values<sup>S3</sup> (**Figure S1**) or  $\sigma^\bullet$  values<sup>S8</sup> (**Table S1** and **Figure S2**). Graphs were generated on Excel and a straight line fitted using the trendline function for **Figure S1** and **Figure S2**.

**Table S1:** Calculated free energies of activation (298 K) and  $\sigma^\bullet$  data used to generate Hammett Plot in **Figure S1**.

| VCP       | X                  | $\Delta G^\ddagger$ | $\Delta\Delta G^\ddagger$ | $\log \frac{\Delta G(X)}{\Delta G(X=H)}$ | $\sigma^{S3}$ | $\sigma^\bullet$ ref. S8 |
|-----------|--------------------|---------------------|---------------------------|------------------------------------------|---------------|--------------------------|
| <b>a</b>  | N(Me) <sub>2</sub> | 21.2                | -4.1                      | -0.056                                   | -0.83         | 0.9                      |
| <b>b</b>  | NH <sub>2</sub>    | 21.9                | -3.4                      | -0.042                                   | -0.66         | 0.7                      |
| <b>c</b>  | OH                 | 23.5                | -1.8                      | -0.011                                   | -0.37         | 0.26                     |
| <b>d</b>  | OMe                | 23.3                | -2.0                      | -0.015                                   | -0.27         | 0.27                     |
| <b>e</b>  | NHC(O)Me           | 23.7                | -1.6                      | -0.007                                   | -0.17         | 0.34                     |
| <b>f</b>  | Me                 | 24.5                | -0.8                      | -0.072                                   | 0             | 0.16                     |
| <b>9j</b> | H                  | 25.3                | 0                         | 0.000                                    | 0             | -                        |
| <b>i</b>  | Cl                 | 25.3                | 0                         | 0.021                                    | 0.23          | 0.11                     |
| <b>j</b>  | Br                 | 25.4                | 0.1                       | 0.023                                    | 0.23          | 0.11                     |
| <b>k</b>  | CF <sub>3</sub>    | 25.4                | 0.1                       | 0.023                                    | 0.54          | 0.05                     |
| <b>l</b>  | CN                 | 25.6                | 0.3                       | 0.026                                    | 0.66          | 0.47                     |
| <b>m</b>  | NO <sub>2</sub>    | 25.9                | 0.6                       | 0.031                                    | 0.78          | 0.57                     |

<sup>[a]</sup>  $\Delta\Delta G^\ddagger_{B3LYP} = (\Delta G^\ddagger_{B3LYP} \text{ S1x}) - (\Delta G^\ddagger_{B3LYP} \text{ 9j})$

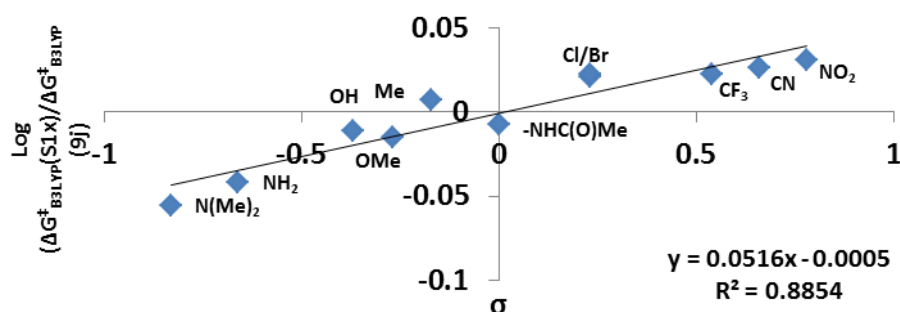

**Figure S1:** Hammett plot generated from calculated free energies of activation and  $\sigma$  values.

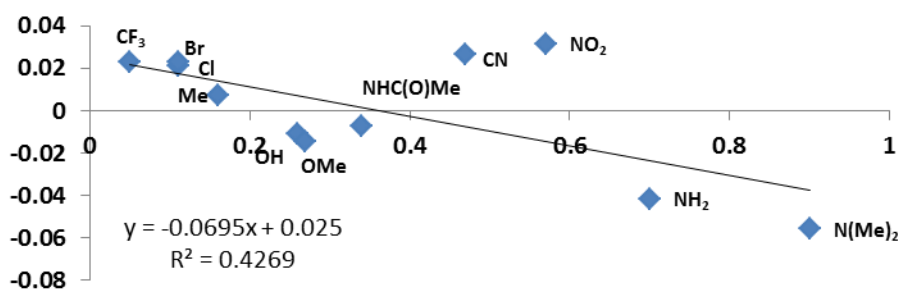

**Figure S2:** Hammett plot generated from calculated free energies of activation and  $\sigma^\bullet$  values.

### Radical Stabilising Effects

As our prime goal was to lower VCPR reaction temperatures, our screening was directed towards vinyl, (hetero)aryl and alkynyl substituents because the most effective mechanism for radical stabilisation is delocalisation through adjacent  $\pi$ -systems.<sup>S9,10</sup> The lower activation energy observed for **9g** (ethenyl, 24.5 kcal mol<sup>-1</sup>) compared with **9j** (phenyl, 25.3 kcal mol<sup>-1</sup>) and **9i** (ethynyl, 25.9 kcal mol<sup>-1</sup>) showed good correlation with the increased radical stabilisation energy reported for these substituents (calculated as 17.6, 14.6 and 14.5 kcal mol<sup>-1</sup>, respectively).<sup>S10</sup> The higher activation energy observed for **9p** (cyano, 29.3 kcal mol<sup>-1</sup>) can be rationalised by a decreased radical stabilisation energy (7.9 kcal mol<sup>-1</sup>),<sup>S10</sup> which arises from the higher electronegativity of the nitrogen atom. These calculations suggested that *bis*-vinyl VCP-**9g** has the potential to rearrange at temperatures lower than 100 °C, but electronic structure calculations predicted that *cis*-isomer **S2** would favour divinylcyclopropane rearrangement via **S-TS2** ( $\Delta G^\ddagger_{\text{B3LYP}} = 13.5$  kcal mol<sup>-1</sup>, VCPR vs [3,3] difference of 11.5 kcal mol<sup>-1</sup>, **Scheme S1a**). Erbes and Boland showed experimentally that a similar dialkenyl-substituted *gem*-difluorocyclopropane (**S3**) exclusively favoured the [3,3]-pathway through to heptadiene **S4** (**Scheme S1b**).<sup>S11</sup> Dialkenyl-**9g** was omitted from any subsequent synthetic investigations due to the unlikelihood of selective VCPR.

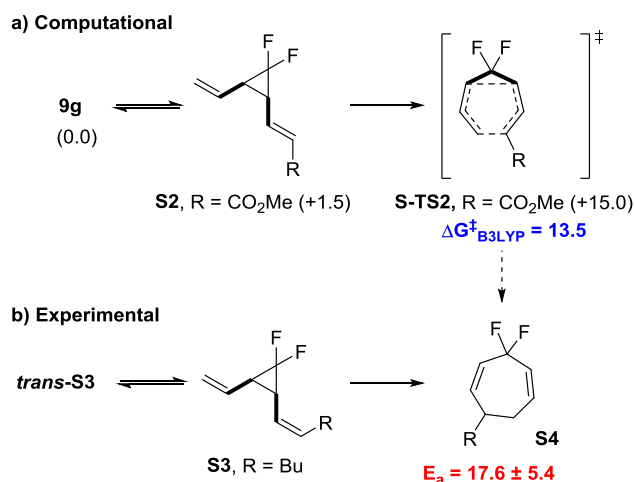

**Scheme S1:** a) Predicted lower energy [3,3]-pathway for bis-vinyldifluorocyclopropane **S2** (free energies are relative to **9h**). b) Experimental example of preferential divinylcyclopropane rearrangement from bis-vinyldifluorocyclopropane **S3** to difluoroheptadiene **S4**<sup>S11</sup> (experimental activation energy ( $E_a$ ) is derived from an Arrhenius determination of reported kinetic data<sup>S11</sup>).

Of the heteroaromatic substituents examined, only the 2- and 4-pyridyl species gave higher VCPR barriers compared with **9j** (**9o**, +2.9 kcal/mol<sup>-1</sup> and **9m**, +1.1 kcal mol<sup>-1</sup>); the nitrogen atom cannot help stabilise radicals in these cases. Creary and co-workers reported similar results during investigations into the radical rearrangement of methylenecyclopropane **S5** to isopropylidenecyclopropane **S6** (**Scheme S2**).<sup>S8,12</sup>

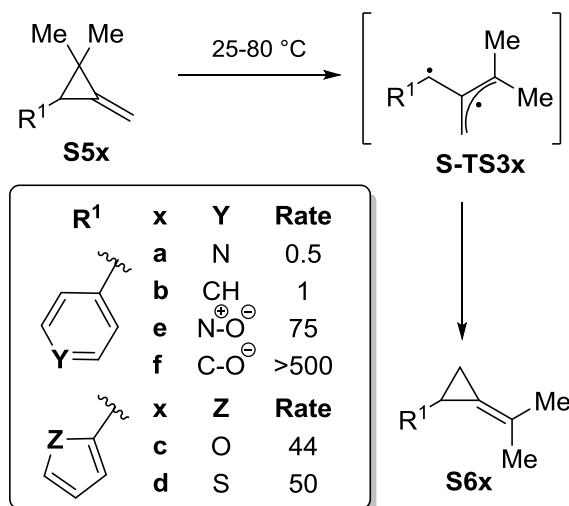

**Scheme S2:** Substituent group radical stability determined from the rate of rearrangement of **S5** to **S6**.<sup>S8</sup>

They reported higher rearrangement rates when heterocycles **S5c-e** and phenolate **S5f** were present. These substituents were dubbed “super radical stabilisers”. Unfortunately all computational attempts at incorporating the most strongly-activating 4-phenoxide

substituent into a VCPR failed; a diradicaloid transition state could not be obtained. Ring opening occurred via a donor-acceptor mechanism when the rearrangement precursor was optimised<sup>S13,14</sup> (*vide infra*).

### Computational Searches Involving Phenolate S7

Intermediate VCP **S7** and transition state **S-TS4** were built from previously optimised structure of phenyl VCP **9j** and **TS1j** and optimised using B3LYP/6-31G\* or UB3LYP/6-31G\*, respectively (Spartan'10, gas phase, 298 K, multiplicity = 1). It was observed that closed shell intermediate **S7** optimised to ring opened cyclopropane intermediate **S8** (Scheme **S3a**); desired VCP **S7** was never observed after optimisation. An optimised transition state structure could be obtained from **S-TS4** ( $\nu_i = i107 \text{ cm}^{-1}$ ) but the lack of diradical character ( $S^2 = 0.0001$ ) suggested that the process had a donor-acceptor mechanism rather than VCPR (Scheme **S3b**).

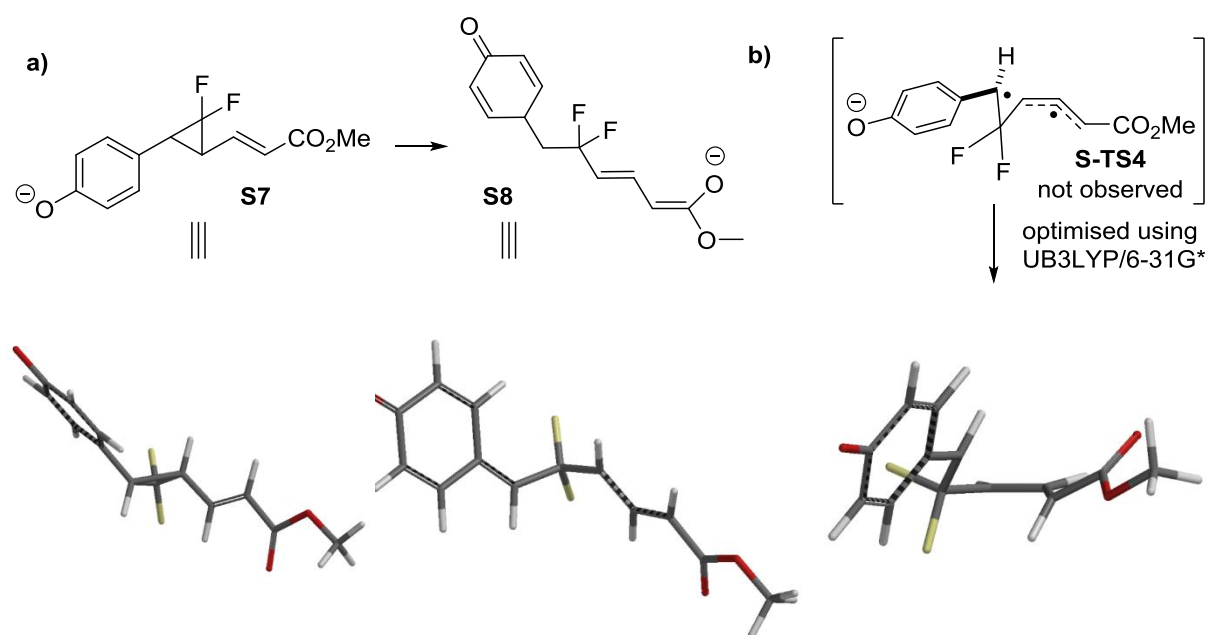

**Scheme S3:** Failed attempts at obtaining optimised structures for a) intermediate **S7** and b) transition state **S-TS4**. The resulting structures strongly suggest the process proceeds *via* a donor-acceptor mechanism.

## Regioselectivity with Heteroarene Precursors

When, the heteroarenes were embedded in our VCPR system, the calculated activation energies (for **9b-9d**) were consistently lower (ranging from -5.3 to -4.2 kcal mol<sup>-1</sup> lower) than for phenyl **9j**. Two regioisomeric transition-states exist for the unsymmetrical species; the 2-pyrrolyl and 2-thiophenyl species favoured **TS1a** whilst the 2-furyl favoured **TS1b** (**Figure S3a**).

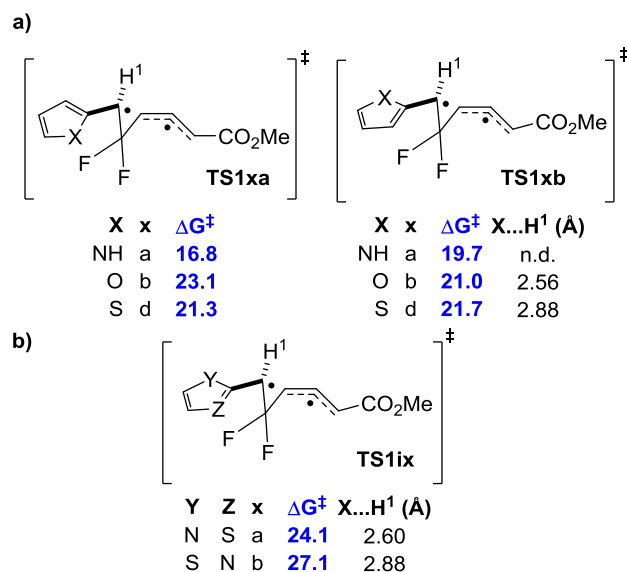

**Figure S3:** Two alternative VCPR transition states available for difluoro-VCP substituted with heteroarenes ( $\Delta G^\ddagger$  energies calculated on Spartan'10, (U)B3LYP/6-31G\*, 298 K, gas phase, energies quoted in kcal mol<sup>-1</sup>).

We propose that the lower energies observed for **TS1bb** compared with **S-TS1ba** arose from a complementary polar interaction between the  $\delta^+$  proton ( $H^1$ ) and the oxygen atom in the furan ring (calculated distances are within the sum of the Van der Waals radii used in Spartan'10). The absence of additional stabilisation observed in **S-TS1cb** over **S-TS1ca** can be attributed to lower strength S...H interactions. This was consistent with calculated activation energies for thiazolyl **TS1i**, favouring the stronger N...H interaction over S...H (**Figure S3b**).<sup>S15</sup> Furthermore, 2-pyrrolyl **9a** favoured **S-TS1xa** due to an unfavourable N-H...H interaction in **S-TS1ab**. The extra stabilisation experience by furyl **9b** over thiophenyl **XXc** offered some explanation as to why our calculated rearrangement rates were ordered differently from those reported by Creary and co-workers. Our lowest calculated activation energy was observed with 2-pyrrolyl **9a** (-8.5 kcal mol<sup>-1</sup>), a substituent which to our knowledge has not previously been reported as a strong radical stabiliser.

## Synthetic Procedures

### General Procedure A: Synthesis of Alkenoates from Commercial Aldehydes

#### Preparation of ethyl 3-(2'-furyl) prop-2E-enoate (**13a**)

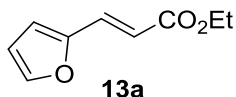

(Carbethoxymethylene)triphenylphosphorane (3.7 g, 10.4 mmol) was added to a solution of furfural **12a** (0.79 mL, 9.5 mmol) in anhydrous DCM (50 mL) and the reaction mixture stirred at room temperature under nitrogen for 7 hours. An aliquot was taken and TLC confirmed full conversion of aldehyde. The reaction mixture was concentrated under reduced pressure and column chromatography on silica gel (1:9 Et<sub>2</sub>O in hexane) afforded alkenoate **13a** (1.36 g, 82%) as a yellow oil.  $R_f$  = 0.31 (1:4 Et<sub>2</sub>O in hexane); <sup>1</sup>H NMR (400 MHz, CDCl<sub>3</sub>):  $\delta$  = 7.49 (d,  $J$  = 1.8 Hz; ArH, 1H), 7.45 (d,  $J$  = 15.8 Hz, ArCH=CH, 1H), 6.62 (d,  $J$  = 3.4 Hz, ArH, 1H), 6.48 (dd,  $J$  = 3.4, 1.8 Hz, ArH, 1H), 6.33 (d,  $J$  = 15.8 Hz, ArCH=CH, 1H), 4.26 (q,  $J$  = 7.1 Hz, OCH<sub>2</sub>CH<sub>3</sub>, 2H), 1.34 ppm (t,  $J$  = 7.1 Hz, OCH<sub>2</sub>CH<sub>3</sub>, 3H); <sup>13</sup>C NMR (100 MHz, CDCl<sub>3</sub>):  $\delta$  = 166.5, 150.5, 144.1, 130.4, 115.5, 114.0, 111.7, 59.9, 13.8 ppm;  $\bar{\nu}$ /(film) = 2361, 2342, 1703, 1638, 1302, 1258, 1207, 1159, 1017 cm<sup>-1</sup>; MS (CI):  $m/z$  (%): 195 (12) [M+C<sub>2</sub>H<sub>5</sub>]<sup>+</sup>, 167 (100) [M+H]<sup>+</sup>, 139 (61), 121 (80) [M-OEt]<sup>+</sup>;  $t_R$  (GC) = 9.62 minutes. The data was in agreement with that reported by Lebel and Davi.<sup>S16</sup>

#### Preparation of (E)-3-(furan-2-yl)allyl acetate (**14a**)

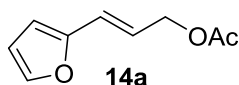

Diisobutylaluminium hydride (14.0 mL of a 1.1 M solution in cyclohexane, 15.0 mmol) was added dropwise to a solution of ester **13a** (1.12 g, 5.0 mmol) in anhydrous toluene (40 mL) under nitrogen at 0 °C for 10 minutes. The reaction mixture was allowed to warm to room temperature and stirred for a further 8 hours, cooled to 0 °C and quenched by dropwise addition of H<sub>2</sub>O (1 mL), 0.1 M aqueous NaOH (1 mL) and H<sub>2</sub>O (1 mL) in that order. MgSO<sub>4</sub> was added to quenched mixture until the solid was free flowing and the mixture was left overnight at room temperature (17 h). The resulting white emulsion was washed with EtOAc (3 x 50 mL) and the organic extracts were combined and concentrated under reduced

pressure.  $^1\text{H}$  NMR spectrum confirmed full conversion to the corresponding alcohol (603 mg, 97%) which was directly acetylated without further purification. Acetic anhydride (0.78 ml, 8.3 mmol) was added dropwise to a solution of crude alcohol (860 g, 6.9 mmol) and pyridine (0.67 ml, 8.3 mmol) in DCM (7 mL) under nitrogen and the reaction mixture was heated to 45 °C for 5 hours. The TLC of the reaction mixture showed complete consumption of alcohol.  $\text{H}_2\text{O}$  (20 mL) was added to the reaction mixture and the organic layer separated. The aqueous layer was extracted with DCM (2 x 10 mL) and the organic layer and extracts were combined and backwashed with HCl (2 x 20 mL of a 1 M aqueous solution), NaOH (3 x 20 mL of a 10 M aqueous solution) and aqueous NaCl (20 mL) in that order. The resulting organic layer was dried ( $\text{MgSO}_4$ ) and concentrated under reduced pressure. Any remaining pyridine in the resulting oil was removed by co-evaporation with toluene (2 x 25 mL) to afford acetate **14a** as a colourless oil (950 g, 83%).  $R_f = 0.43$  (1:4  $\text{Et}_2\text{O}$  in hexane);  $^1\text{H}$  NMR (400 MHz,  $\text{CDCl}_3$ ):  $\delta = 7.37$  (d,  $J = 1.8$  Hz, ArH, 1H), 6.49 (dt,  $J = 15.8$  Hz,  $^4J = 1.3$  Hz, ArCH=CHCH<sub>2</sub>, 1H), 6.40 (dd,  $J = 3.5, 1.8$  Hz, ArH, 1H), 6.30 (d,  $J = 3.4$  Hz, ArH, 1H), 6.23 (dt,  $J = 15.8, 6.5$  Hz, CH=CHCH<sub>2</sub>, 1H), 4.72 (dd,  $J = 6.4$  Hz,  $^4J = 1.3$  Hz, CH<sub>2</sub>OAc, 2H), 2.12 ppm (s, COCH<sub>3</sub>, 3H);  $^{13}\text{C}$  NMR (100 MHz,  $\text{CDCl}_3$ ):  $\delta = 170.3, 151.3, 141.9, 121.6, 121.2, 110.9, 108.4, 64.1, 20.5$  ppm;  $\bar{\nu}$ /(film) = 2359, 1734, 1377, 1360, 1223, 1013  $\text{cm}^{-1}$ ; MS (CI):  $m/z$  (%): 166 (5) [M], 123 (8) [M-COMe]<sup>+</sup>, 107 (100) [M-OAc]<sup>+</sup>, 61 (75);  $t_R$  (GC) = 10.26 minutes. The data were in agreement with those reported by Iwasaki and co-workers.<sup>S17</sup>

### Preparation of cinnamyl acetate (13b)

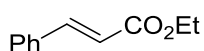

**13b**

Ester **13b** was prepared from benzaldehyde **12b** (1.06 ml, 10 mmol), (carbethoxymethylene)triphenylphosphorane (3.83 g, 11.0 mmol) and DCM (20 ml) according to General Procedure A. Column chromatography on silica gel (1:4  $\text{Et}_2\text{O}$  in hexane) afforded ester **13b** as a yellow oil (930 mg, 87%).  $^1\text{H}$  NMR data was consistent with a commercial sample.



### Preparation of ethyl 3-(2'-thiophenyl)-prop-2E-enoate (**13c**)

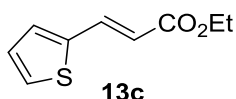

Ester **13c** was prepared from thiophene-2-carbaldehyde **12c** (0.92 ml, 10 mmol), (carbethoxymethylene)triphenylphosphorane (4.6 g, 11.2 mmol) and DCM (30 ml) over 20 hours according to General Procedure A. Column chromatography on silica gel (1:4 Et<sub>2</sub>O in hexane) afforded ester **13c** as a yellow oil (1.79 g, 98%). *R<sub>f</sub>* = 0.31 (1:1 Et<sub>2</sub>O in hexane); <sup>1</sup>H NMR (400 MHz, CDCl<sub>3</sub>): δ = 7.81 (d, *J* = 15.7 Hz, ArCH=CH, 1H), 7.39 (d, *J* = 5.1 Hz, ArH, 1H), 7.27 (d, *J* = 3.6 Hz, ArH, 1H), 7.07 (dd, *J* = 5.1, 3.6 Hz, ArH, 1H), 6.26 (d, *J* = 15.7 Hz, ArCH=CH, 1H), 4.27 (q, *J* = 7.0 Hz, OCH<sub>2</sub>CH<sub>3</sub>, 2H), 1.35 ppm (t, *J* = 7.0 Hz, OCH<sub>2</sub>CH<sub>3</sub>, 3H); <sup>13</sup>C NMR (100 MHz, CDCl<sub>3</sub>): δ = 166.4, 139.1, 136.5, 130.3, 127.8, 127.6, 116.5, 60.0, 13.8 ppm;  $\bar{\nu}$ /(film) = 2358, 2342, 1703, 1624, 1369, 1304, 1202, 1159, 1042 cm<sup>-1</sup>; MS (CI): *m/z* (%): 211 (13) [M+C<sub>2</sub>H<sub>5</sub>]<sup>+</sup>, 183 (100) [M+H]<sup>+</sup>, 137 (80) [M-OEt]<sup>+</sup>; *t<sub>R</sub>* (GC) = 11.85 minutes. The data was in agreement with that reported by Lebel and Davi.<sup>S16</sup>

### Preparation of ethyl 3-(5'-benzo[d][1,3]dioxolyl)-prop-2E-enoate (**13d**)

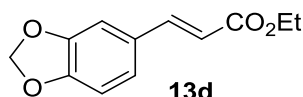

Ester **13d** was prepared from benzo[d][1,3]dioxole-5-carbaldehyde **12d** (1.39 g, 6.3 mmol), (carbethoxymethylene)triphenylphosphorane (3.47 g, 8.4 mmol) and DCM (30 ml) over 18 hours according to General Procedure A. Column chromatography on silica gel (1:4 Et<sub>2</sub>O in hexane) afforded ester **13d** as a white solid (1.88 g, 98%). m.p. = 63-65 °C (obtained from powdered solid isolated after chromatography); *R<sub>f</sub>* = 0.38 (1:4 Et<sub>2</sub>O in hexane); <sup>1</sup>H NMR (400 MHz, CDCl<sub>3</sub>): δ = 7.63 (d, *J* = 15.9 Hz, ArCH=CH, 1H), 7.06 (d, <sup>4</sup>*J* = 1.6 Hz, ArH, 1H), 7.03 (dd, *J* = 8.1, <sup>4</sup>*J* = 1.6 Hz, ArH, 1H), 6.83 (d, *J* = 8.1 Hz, ArH, 1H), 6.29 (d, *J* = 15.9 Hz, ArCH=CH, 1H), 6.03 (s, O<sub>2</sub>CH<sub>2</sub>, 2H), 4.28 (q, *J* = 7.1 Hz, OCH<sub>2</sub>CH<sub>3</sub>, 2H), 1.35 ppm (t, *J* = 7.1 Hz, OCH<sub>2</sub>CH<sub>3</sub>, 3H); <sup>13</sup>C NMR (100 MHz, CDCl<sub>3</sub>): δ = 166.7, 149.1, 147.8, 143.8, 128.4, 123.9, 115.7, 108.1, 106.0, 101.1, 59.9, 13.9 ppm;  $\bar{\nu}$ /(film) = 2359, 2342, 1701, 1632, 1489, 1445, 1236, 1163 cm<sup>-1</sup>; MS (CI): *m/z* (%): 249 (19) [M+C<sub>2</sub>H<sub>5</sub>]<sup>+</sup>, 221 (95) [M+H]<sup>+</sup>, 193 (12), 175 (100) [M-OEt]<sup>+</sup>, 147 (10) [M-CO<sub>2</sub>Et]<sup>+</sup>; *t<sub>R</sub>* (GC) = 13.91 minutes. The data was in agreement with that reported by Lebel and Davi.<sup>S16</sup>

### Preparation of ethyl 3-(2'-pyridyl)-prop-2E-enoate (**13e**)

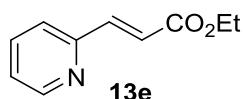

Ester **13e** was prepared from picolinaldehyde **12e** (0.57 ml, 6 mmol), (carbethoxymethylene)triphenylphosphorane (2.7 g, 6.6 mmol) and DCM (25 ml) according to General Procedure A. Column chromatography on silica gel (1:1 Et<sub>2</sub>O in hexane) afforded ester **13e** as a yellow oil (930 mg, 87%).  $R_f = 0.34$  (1:1 Et<sub>2</sub>O in hexane); <sup>1</sup>H NMR (400 MHz, CDCl<sub>3</sub>):  $\delta = 8.66$  (br. d,  $J = 4.7$  Hz, ArH, 1H), 7.72 (td,  $J = 7.8$  Hz,  $^4J = 1.9$  Hz, ArH, 1H), 7.70 (d,  $J = 15.7$  Hz, ArCH=CH, 1H), 7.44 (dt,  $J = 7.8$  Hz,  $^4J = 1.0$  Hz, ArH, 1H), 7.27 (ddd,  $J = 7.8, 4.7$  Hz,  $^4J = 1.0$  Hz, ArH, 1H), 6.93 (d,  $J = 15.7$  Hz, ArCH=CH, 1H), 4.29 (q,  $J = 7.14$  Hz, OCH<sub>2</sub>CH<sub>3</sub>, 2H), 1.35 ppm (t,  $J = 7.14$  Hz, OCH<sub>2</sub>CH<sub>3</sub>, 3H); <sup>13</sup>C NMR (100 MHz, CDCl<sub>3</sub>):  $\delta = 166.3, 152.5, 149.6, 142.8, 136.2, 123.7, 123.6, 122.0, 60.2, 13.8$  ppm;  $\bar{\nu}$ /(film) = 2981, 2359, 2342, 1717, 1201, 1167 cm<sup>-1</sup>; MS (CI):  $m/z$  (%): 218 (5) [M+C<sub>3</sub>H<sub>5</sub>]<sup>+</sup>, 206 (10) [M+C<sub>2</sub>H<sub>5</sub>]<sup>+</sup>, 178 (100) [M+H]<sup>+</sup>, 150 (15), 132 (20) [M-OEt]<sup>+</sup>;  $t_R$  (GC) = 12.10 minutes. The data was in agreement with that reported by Lebel and Davi.<sup>S16</sup>

### Preparation of ethyl 3-(2'-pyrrolyl-1-carboxylic acid *tert*-butyl ester)-prop-2E-enoate (**13f**)

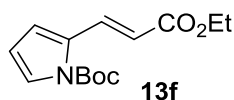

Ester (**13f**) was prepared from aldehyde **12f** (3.9 g, 20 mmol), (carbethoxymethylene)triphenylphosphorane (9.25 g, 26 mmol) and DCM (125 ml) according to General Procedure A. Column chromatography (1:19 Et<sub>2</sub>O in hexane to 1:4 Et<sub>2</sub>O in hexane) afforded alkenoate **13f** as a yellow oil (3.4 g, 60%).  $R_f = 0.40$  (1:4 Et<sub>2</sub>O in hexane); <sup>1</sup>H NMR (400 MHz, CDCl<sub>3</sub>):  $\delta = 8.30$  (d,  $J = 15.9$  Hz, ArCH=CH, 1H), 7.42 (br. dd,  $J = 3.6$  Hz,  $^4J = 1.6$  Hz, ArH, 1H), 6.72-6.70 (m, ArH, 1H), 6.23 (t,  $J = 3.6$  Hz, ArH, 1H), 6.22 (d,  $J = 15.9$  Hz, CH=CHCO<sub>2</sub>Et, 1H), 4.26 (q,  $J = 7.1$  Hz, OCH<sub>2</sub>CH<sub>3</sub>, 2H), 1.65 (s, OC(CH<sub>3</sub>)<sub>3</sub>, 9H), 1.3 ppm (t,  $J = 7.1$  Hz, OCH<sub>2</sub>CH<sub>3</sub>, 3H); <sup>13</sup>C NMR (100 MHz, CDCl<sub>3</sub>):  $\delta = 166.6, 148.5, 134.4, 130.6, 124.3, 116.1, 114.3, 110.9, 84.4, 59.8, 27.5, 13.9$  ppm;  $\bar{\nu}$ /(film) = 2976, 1742, 1705, 1621, 1316, 1299, 1245, 1158, 1117 cm<sup>-1</sup>; MS (CI):  $m/z$  (%): 194 (12) [M+ C<sub>2</sub>H<sub>5</sub>-Pyrrolyl-N-Boc]<sup>+</sup>, 166 (50) [M-Pyrrolyl-N-Boc]<sup>+</sup>, 120 (100);  $t_R$  (GC) = 12.58 minutes. The data was in agreement with that reported by Jeffrey and co-workers.<sup>S18</sup>

### Preparation of ethyl 3-(2'-thiazolyl)-prop-2E-enoate (13g)

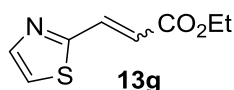

Aldehyde **12g** was synthesised from thiazole (1.75 mL, 25 mmol), DMF (3.9 mL, 20 mmol), BuLi (14.3 mL of a 2.1 M in THF, 30 mmol) in THF (100 mL) according to Glorius and co-workers<sup>S2</sup> as a yellow oil. <sup>1</sup>H NMR confirmed full conversion to aldehyde. Ester **13f** was prepared from crude aldehyde **12g** (assumed 25 mmol), (carbethoxymethylene)triphenylphosphorane (9.75 g, 27 mmol) and DCM (150 ml) according to general procedure A. Column chromatography (7:20 Et<sub>2</sub>O in hexane) afforded ester **13f** as a yellow oil (3.38 g, 74%) with a 4:1 mixture of alkene isomers (*E*-isomer major). **Data for Mixture:** *R*<sub>f</sub> = 0.20 (1:4 Et<sub>2</sub>O in hexane);  $\bar{\nu}$ /(film) = 2978, 1708, 1630, 1468, 1480, 1299, 1266, 1175 1030 cm<sup>-1</sup>; HRMS (FTMS): calcd. for C<sub>8</sub>H<sub>10</sub>O<sub>2</sub>N<sub>1</sub>S<sub>1</sub>, 184.0423 [M+H]<sup>+</sup> found 184.0427. **Data for E-13f:** <sup>1</sup>H NMR (400 MHz, CDCl<sub>3</sub>):  $\delta$  = 7.94 (d, *J* = 3.3 Hz, ArH, 1H), 7.82 (d, *J* = 15.9 Hz, ArCH=CH, 1H), 7.45 (d, *J* = 3.3 Hz, ArH, 1H), 6.77 (d, *J* = 15.9 Hz, CH=CHCO<sub>2</sub>Et, 1H), 4.31 (q, *J* = 7.3 Hz, OCH<sub>2</sub>CH<sub>3</sub>, 2H), 1.36 ppm (t, *J* = 7.3 Hz, CH<sub>2</sub>CH<sub>3</sub>, 3H); <sup>13</sup>C NMR (100 MHz, CDCl<sub>3</sub>):  $\delta$  = 165.3, 162.9, 144.2, 135.2, 122.5, 120.8, 60.3, 13.7 ppm; MS (CI): *m/z* (%): 224 (17), [M+C<sub>3</sub>H<sub>5</sub>]<sup>+</sup>, 212 (25) [M+C<sub>2</sub>H<sub>5</sub>]<sup>+</sup>, 184 (100) [M+H]<sup>+</sup>, 156 (42), 138 (59) [M-OEt]; *t*<sub>R</sub> (GC) = 11.83 minutes. **Data for Z-13f:** <sup>1</sup>H NMR (400 MHz, CDCl<sub>3</sub>):  $\delta$  = 7.97 (d, *J* = 3.3 Hz, ArH, 1H), 7.57 (dd, *J* = 3.3 Hz, <sup>5</sup>*J* = 1.0 Hz, ArH, 1H), 7.37 (dd, *J* = 12.7 Hz, <sup>5</sup>*J* = 1.0 Hz, ArCH=CH, 1H), 6.15 (d, *J* = 12.7 Hz, CH=CHCO<sub>2</sub>Et, 1H), 4.32 (q, *J* = 7.2 Hz, OCH<sub>2</sub>H<sub>3</sub>, 2H), 1.37 ppm (t, *J* = 7.2 Hz, CH<sub>2</sub>H<sub>3</sub>, 3H); <sup>13</sup>C NMR (100 MHz, CDCl<sub>3</sub>):  $\delta$  = 165.3, 160.2, 142.6, 136.4, 123.7, 118.9, 60.2, 13.6 ppm; MS (CI): *m/z* (%): 224 (11), [M+C<sub>3</sub>H<sub>5</sub>]<sup>+</sup>, 212 (18) [M+C<sub>2</sub>H<sub>5</sub>]<sup>+</sup>, 184 (100) [M+H]<sup>+</sup>, 156 (20), 138 (97) [M-OEt]; 112 (14); *t*<sub>R</sub> (GC) = 11.59 minutes.

### Preparation of ethyl 3-(2'-furyl-3-methyl)-prop-2E-enoate (13h)

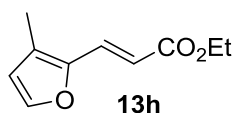

Diisobutylaluminium hydride (50 mL of a 0.9 M solution in cyclohexane, 45 mmol) was added dropwise to a solution of methyl 3-methyl-2-furoate (2.04 g, 14.6 mmol) in anhydrous toluene (120 mL) under nitrogen at -78 °C for 5 minutes. The reaction mixture

was allowed to warm to room temperature and stirred for a further 8 hours, cooled to -78 °C and quenched with aqueous potassium sodium tartrate tetrahydrate (sat. Rochelle salt, 40 mL) and EtOAc (50 mL). The resulting organic layer was separated and collected. The aqueous layer was extracted further with EtOAc (50 mL x 6) and the separated extracts combined with the original organic layer, dried (MgSO<sub>4</sub>) and concentrated under reduced pressure to afford (3-methylfuran-2-yl)methanol as a yellow oil (1.33 g 81%). <sup>1</sup>H NMR confirmed full conversion to desired alcohol which was used without further purification. Bis(acetoxy)iodobenzene (BAIB, 4.18 g, 13 mmol) was added to a solution of (3-methylfuran-2-yl)methanol (1.33 g, 11.8 mmol), TEMPO (184 mg, 1.18 mmol), in anhydrous DCM (90 mL) and the reaction mixture was stirred at room temperature under nitrogen for 4 hours. The <sup>1</sup>H NMR spectrum of a reaction aliquot showed complete conversion to corresponding aldehyde **12h**. (Carbethoxymethylene)triphenylphosphorane (5.2 g, 15 mmol) was then added and the reaction mixture stirred for 17 hours. <sup>1</sup>H NMR of a reaction aliquot showed complete consumption of aldehyde. The resulting orange solution was concentrated under reduced pressure and column chromatography on silica gel (2:25 Et<sub>2</sub>O in hexane) afforded alkenoate **13h** as a yellow oil (1.26 g, 45%). R<sub>f</sub> = 0.44 (1:10 Et<sub>2</sub>O in hexane);  $\bar{\nu}$ /(film) = 2976, 1703, 1632, 1299, 1253, 1164 cm<sup>-1</sup>; <sup>1</sup>H NMR (400 MHz, CDCl<sub>3</sub>):  $\delta$  = 7.50 (d, *J* = 15.5 Hz, ArCH=CH, 1H), 7.40 (dq, *J* = 1.6 Hz, <sup>4</sup>*J* = 0.5 Hz, ArH, 1H), 6.34 (d, *J* = 1.6 Hz, ArH, 1H), 6.26 (d, *J* = 15.5 Hz, CH=CHCO<sub>2</sub>Et, 1H), 4.27 (q, *J* = 7.1 Hz, OCH<sub>2</sub>H<sub>3</sub>, 2H), 2.18 (s, ArCH<sub>3</sub>, 3H), 1.35 ppm (t, *J* = 7.1 Hz, CH<sub>2</sub>CH<sub>3</sub>, 3H); <sup>13</sup>C NMR (100 MHz, CDCl<sub>3</sub>):  $\delta$  = 166.9, 146.6, 143.4, 128.5, 125.1, 114.1, 113.5, 59.7, 13.8, 9.7 ppm; MS (CI): *m/z* (%): 209 (18), [M+C<sub>2</sub>H<sub>5</sub>]<sup>+</sup>, 181 (100), [M+H]<sup>+</sup>, 153 (12), 135 (72), [M-OEt]; HRMS (NSI): calcd. for C<sub>10</sub>H<sub>13</sub>O<sub>3</sub>, 181.0859 [M+H]<sup>+</sup> found 184.0857; t<sub>R</sub> (GC) = 11.43 minutes.

## General Procedure B: Difluorocyclopropanation of Alkenoates **13** with MDFA

### Preparation of ethyl (1*S*\*,3*S*\*)-2,2-difluoro-3-(fur-2-yl)cyclopropane-1-carboxylate (**15a**)

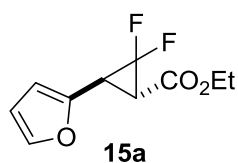

An oven dried two-necked round bottom flask containing potassium iodide (1.87 g, 11.2 mmol) was sealed with a SubaSeal, and the salt was stirred and lightly flame dried under an atmosphere of argon. A low boiling point water condenser with a gas outlet connected to an argon/vacuum manifold was fitted to the reaction flask and the atmosphere was purged three times. Alkenoate **13a** (1.48 g, 8.9 mmol) followed by diglyme (1.43 mL) were added and the yellow suspension purged with argon/vacuum once and then heated to 120 °C. Once the reaction temperature had been reached, TMSCl (2.9 mL, 22.3 mmol) and MDFA (2.9 mL, 22.3 mmol) were added dropwise in that order. After 4 hours, the black reaction mixture was allowed to cool to room temperature and the reaction mixture was quenched with aqueous NH<sub>4</sub>Cl (10 mL) and diethyl ether (10 mL) was added. The organic layer was separated and the aqueous layer was extracted with diethyl ether (3 x 10 mL). The original organic layer and the extracts were combined, dried (MgSO<sub>4</sub>) and concentrated under reduced pressure to remove volatile materials. The <sup>1</sup>H NMR spectrum of the resulting brown oil confirmed 66% conversion to difluorocyclopropyl **15a**. Column chromatography on silica gel (1:20 Et<sub>2</sub>O in hexane) afforded difluorocyclopropyl **15a** as a yellow oil (760 mg, 40%) and recovered starting alkenoate **13a** (340 mg, 23%). R<sub>f</sub> = 0.4 (1:19 Et<sub>2</sub>O in hexane); <sup>1</sup>H NMR (400 MHz, CDCl<sub>3</sub>): δ = 7.39 (dd, *J* = 2.0 Hz, <sup>4</sup>*J* = 0.8 Hz, Ar*H*, 1H), 6.38 (dd, *J* = 3.4, 2.0 Hz, Ar*H*, 1H), 6.29 (dd, *J* = 3.4 Hz, <sup>4</sup>*J* = 0.8 Hz, Ar*H*, 1H), 4.28 (q, *J* = 7.1 Hz, OCH<sub>2</sub>CH<sub>3</sub>, 2H), 3.48 (ddd, *J*<sub>H-F</sub> = 12.3 Hz, *J* = 7.7 Hz, <sup>4</sup>*J*<sub>H-F</sub> = 1.8 Hz, ArCHCF<sub>2</sub>, 1H), 2.79 (dd, *J*<sub>H-F</sub> = 13.4 Hz, *J* = 7.7 Hz, CF<sub>2</sub>CHCO<sub>2</sub>Et, 1H), 1.34 ppm (t, *J* = 7.2 Hz, OCH<sub>2</sub>CH<sub>3</sub>, 3H); <sup>13</sup>C NMR (100 MHz, CDCl<sub>3</sub>): δ = 165.5, 145.1, 142.6, 110.6, 108.8 (dd, <sup>1</sup>*J*<sub>C-F</sub> = 294.6, 289.7 Hz) 108.4, 61.9, 32.1 (t, <sup>2</sup>*J*<sub>C-F</sub> = 10.9 Hz), 26.7 (dd, <sup>2</sup>*J*<sub>C-F</sub> = 13.3, 8.9 Hz) 14.1 ppm; <sup>19</sup>F NMR (376 MHz, CDCl<sub>3</sub>): δ = -133.1 (dd, <sup>2</sup>*J* = 151.7 Hz, *J*<sub>F-H</sub> = 13.4 Hz, 1F), -135.1 ppm (dd, <sup>2</sup>*J* = 152.8 Hz, *J*<sub>F-H</sub> = 12.2 Hz, 1F);  $\bar{\nu}$ /(film) = 2986, 2932, 2359, 2342, 1736, 1447, 1331, 1290, 1153, 1009 cm<sup>-1</sup>; MS (CI): *m/z* (%): 257 (4) [M+C<sub>3</sub>H<sub>5</sub>]<sup>+</sup>, 245 (9) [M+C<sub>2</sub>H<sub>5</sub>]<sup>+</sup>, 217 (45) [M+H]<sup>+</sup>, 197 (100) [M-F]<sup>+</sup>, 189 (58), 171 (42) [M-

OEt]<sup>+</sup>, 169 (70) [(M+H)-F-Et]<sup>+</sup>, 143 (20), 125 (16); t<sub>R</sub> (GC) = 9.49 minutes; HRMS (APCI): calcd for C<sub>10</sub>H<sub>11</sub>F<sub>2</sub>O<sub>3</sub>, 217.0668 [M+H]<sup>+</sup> found 217.0671.

#### Preparation of ethyl (1S\*,3S\*)-2,2-difluoro-3-phenylcyclopropane-1-carboxylate (**15b**)

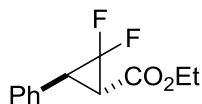

**15b**

The preparation of ester **15b** was attempted from alkenoate **13b** (0.67 mL, 4.03 mmol), MDFA (2.6 mL, 10 mmol), TMSCl (2.6 mL, 10 mmol), potassium iodide (1.87 g, 11.2 mmol) and diglyme (1.4 mL) according to General Procedure B with a total reaction time of 24 hours. The resulting <sup>1</sup>H NMR of the crude reaction mixture after work up confirmed incomplete conversion of **13b** (28% conv. to **15b**). The reaction was repeated using commercial ethyl cinnamate (**13b**) according to general procedure B on twice the scale. The resulting <sup>1</sup>H spectrum of the resulting brown oil confirmed incomplete conversion of **13b** (29% conv. to **15b**).

#### Preparation of ethyl (1S\*,3R\*)-2,2-difluoro-3-(thiophen-2-yl)cyclopropane-1-carboxylate (**15c**)

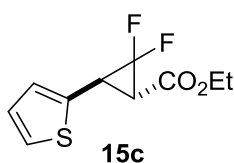

**15c**

Ester **15c** was prepared from alkenoate **13c** (1.45 mg, 8 mmol), MDFA (2.6 mL, 20 mmol), TMSCl (2.6 mL, 20 mmol), potassium iodide (3.68 g, 22.6 mmol) and diglyme (1.3 mL) according to general procedure B with a reaction time of 4 hours. <sup>1</sup>H NMR of the resulting crude product showed 77% conversion to desired ester **15c**. Column chromatography on silica gel (1:19 Et<sub>2</sub>O in hexane) afforded ester **15c** as a yellow oil (1.32 g, 71%) and recovered alkenoate **13c** (310 mg, 21%). R<sub>f</sub> = 0.42 (1:24 Et<sub>2</sub>O in hexane); <sup>1</sup>H NMR (500 MHz, CDCl<sub>3</sub>): δ = 7.26 (dd, J = 3.3, 3.1 Hz, ArH, 1H), 7.00 (d, J = 3.3 Hz, ArH, 1H), 7.00 (d, J = 3.1 Hz, ArH, 1H), 4.27 (q, J = 7.2 Hz, OCH<sub>2</sub>CH<sub>3</sub>, 2H), 3.63 (ddd, J<sub>H-F</sub> = 13.1, 2.3 Hz, J = 7.7 Hz, ArCH, 1H), 2.67 (dd, J<sub>H-F</sub> = 13.6, J = 7.7 Hz, CHCO<sub>2</sub>Et, 1H), 1.33 ppm (t, J = 7.2 Hz, OCH<sub>2</sub>CH<sub>3</sub>, 3H); <sup>13</sup>C NMR (100 MHz, CDCl<sub>3</sub>): δ = 165.7, 133.3, 127.0, 126.7, 125.4, 110.4 (dd, <sup>1</sup>J<sub>C-F</sub> = 296.8, 290.3 Hz), 61.9,

34.5 ( $^2J_{C-F} = 10.9$  Hz), 28.6 (dd,  $^2J_{C-F} = 13.0, 9.2$  Hz), 14.1 ppm;  $^{19}\text{F}$  NMR (376 MHz,  $\text{CDCl}_3$ ):  $\delta = -132.8$  (ddd,  $^2J_{F-F} = 151.7$  Hz,  $J_{F-H} = 13.6, 2.4$  Hz, 1F),  $-134.2$  ppm (dd,  $^2J_{F-F} = 151.2$  Hz,  $J_{F-H} = 13.3$  Hz, 1F);  $\bar{\nu}/(\text{film}) = 2965, 2359, 2342, 1732, 1466, 1431, 1325, 1285, 1215, 1152, 1009$   $\text{cm}^{-1}$ ; MS (CI):  $m/z$  (%): 261 (7)  $[\text{M}+\text{C}_2\text{H}_5]^+$ , 233 (33)  $[\text{M}+\text{H}]^+$ , 213 (100)  $[\text{M}-\text{F}]^+$ , 205 (43), 187 (36), 185 (66)  $[\text{M}-(\text{F}+\text{Et})]^+$ , 159 (16), 139 (18); HRMS (APCI): calcd for  $\text{C}_{10}\text{H}_{14}\text{F}_2\text{O}_2\text{S}_1\text{N}_1$ , 250.0708  $[\text{M}+\text{NH}_4]^+$  found 250.0706;  $t_R$  (GC) = 11.15 minutes.

### Preparation of ethyl (1S\*,3S\*)-3-(benzo[d][1,3]dioxol-5-yl)-2,2-difluorocyclopropane-1-carboxylate (**15d**)

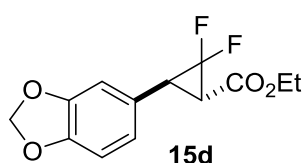

Ester **15d** was prepared from alkenoate **13d** (1.66 g, 7.5 mmol), MDFA (2.4 mL, 18.5 mmol), TMSCl (2.4 mL, 18.5 mmol), potassium iodide (3.45 g, 20.7 mmol) and diglyme (1.2 mL) according to general procedure B.  $^1\text{H}$  NMR of the resulting crude product showed 50% conversion to desired ester **15d**. Column chromatography on silica gel (1:9  $\text{Et}_2\text{O}$  in hexane) afforded ester **15d** as a yellow oil (880 mg, 43%) and recovered alkenoate **13d** (700 mg, 42%).  $R_f = 0.59$  (1:4  $\text{Et}_2\text{O}$  in hexane);  $^1\text{H}$  NMR (400 MHz,  $\text{CDCl}_3$ ):  $\delta = 6.82\text{-}6.73$  (m, ArH, 3H), 6.00 (s,  $\text{OCH}_2\text{O}$ , 2H), 4.28 (q,  $J = 7.2$  Hz,  $\text{OCH}_2\text{CH}_3$ , 2H), 3.44 (ddd,  $J_{H-F} = 13.2, 2.9$  Hz,  $J = 7.9$  Hz, ArCH, 1H), 2.65 (dd,  $J_{H-F} = 13.2$  Hz,  $J = 7.9$  Hz,  $\text{CHCO}_2\text{Et}$ , 1H), 1.34 (t,  $J = 7.2$  Hz,  $\text{OCH}_2\text{CH}_3$ , 3H);  $^{13}\text{C}$  NMR (100 MHz,  $\text{CDCl}_3$ ):  $\delta = 165.8, 147.5, 146.9, 124.1, 121.3, 110.2$  (t,  $^1J_{C-F} = 294.2, 287.2$  Hz), 107.9 (represents 2 carbons), 100.8, 61.3, 32.4 (dd,  $^2J_{C-F} = 11.2, 8.8$  Hz), 32.0 (t,  $^2J_{C-F} = 11.1$  Hz) 13.6 ppm;  $^{19}\text{F}$  NMR (376 MHz,  $\text{CDCl}_3$ ):  $\delta = -133.1$  (dd,  $^2J_{F-F} = 151.9$  Hz,  $J_{F-H} = 13.6$  Hz, 1F),  $-134.1$  (ddd,  $^2J_{F-F} = 151.3$  Hz,  $J_{F-H} = 13.5, 2.7$  Hz, 1F),  $\bar{\nu}/(\text{film}) = 2359, 2342, 1732, 1506, 1466, 1449, 1290, 1242, 1213, 1152, 1038, 1013, 989$   $\text{cm}^{-1}$ ; MS (CI):  $m/z$  (%): 299 (19)  $[\text{M}+\text{C}_2\text{H}_5]^+$ , 271 (44)  $[\text{M}+\text{H}]^+$ , 251 (94)  $[\text{M}-\text{F}]^+$ , 223 (75)  $[(\text{M}+\text{H})-\text{F}-\text{OEt}]^+$ , 206 (24), 197 (26)  $[\text{M}-\text{CO}_2\text{Et}]^+$ , 177 (100); HRMS (APCI): calcd for  $\text{C}_{13}\text{H}_{13}\text{F}_2\text{O}_4$ , 271.0776  $[\text{M}+\text{H}]^+$  found 271.0776;  $t_R$  (GC) = 13.50 minutes.

**Preparation of ethyl (1*S*\*,3*S*\*)-2,2-difluoro-3-(pyridin-2-yl)cyclopropane-1-carboxylate (15e)**

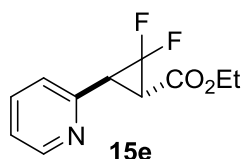

The preparation of ester **15e** was attempted from alkenoate **13e** (400 mg, 2.3 mmol), MDFA (0.74 mL, 5.7 mmol), TMSCl (0.74 mL, 5.7 mmol), potassium iodide (1.1 g, 6.6 mmol) and diglyme (0.45 mL) according to general procedure B with a total reaction time of 4 hours. The resulting <sup>1</sup>H NMR of the resulting crude black solid showed diglyme and diethyl ether with trace amounts of alkenoate **13e**. The desired product **15e** was not observed (0% conversion).

**Preparation of ethyl (1*S*\*,3*S*\*)-2,2-difluoro-3-(2'-pyrrolyl-1-carboxylic acid *tert*-butyl ester)cyclopropane-1-carboxylate (15f)**

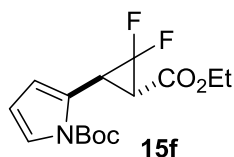

Ester **15f** was prepared from alkenoate **13f** (2.12 g, 8 mmol), MDFA (2.6 mL, 20 mmol), TMSCl (2.6 mL, 20 mmol), potassium iodide (3.74 g, 22.4 mmol) and diglyme (1.6 mL) according to general procedure B. <sup>1</sup>H NMR of the resulting crude product showed 92% conversion to desired product. Column chromatography on silica gel (1:20 Et<sub>2</sub>O in hexane) afforded ester **15f** as a yellow oil (1.37 g, 54%) and recovered alkenoate **13f** (140 mg, 7%). *R<sub>f</sub>* = 0.35 (1:4 Et<sub>2</sub>O in hexane); <sup>1</sup>H NMR (400 MHz, CDCl<sub>3</sub>): δ = 7.29 (ddd, *J* = 3.3 Hz, <sup>4</sup>*J* = 1.7 Hz, <sup>5</sup>*J* = 0.7 Hz, *ArH*, 1H), 6.17-6.15 (br. m, *ArH*, 1H), 6.14 (t, *J* = 3.4 Hz, *ArH*, 1H), 4.28 (ABq, *J* = 7.4 Hz, <sup>2</sup>*J* = 3.1 Hz, OCH<sub>a</sub>H<sub>b</sub>CH<sub>3</sub>, 2H), 3.73 (br. dd, *J*<sub>H-F</sub> = 12.8 Hz, *J* = 7.8 Hz, *ArCH*, 1H), 2.63 (dd, *J* = 13.4 Hz, *J* = 7.8 Hz, HCCO<sub>2</sub>Et, 1H), 1.63 (s, C(CH<sub>3</sub>)<sub>3</sub>, 9H), 1.34 (t, *J* = 7.2 Hz, CH<sub>2</sub>CH<sub>3</sub>, 3H); <sup>13</sup>C NMR (100 MHz, CDCl<sub>3</sub>): δ = 165.7, 148.4, 124.0, 122.1, 112.9, 110.3 (dd, <sup>1</sup>*J*<sub>C-F</sub> = 297.3, 287.2 Hz), 109.6, 84.1, 61.1, 31.7 (t, <sup>2</sup>*J*<sub>C-F</sub> = 10.9 Hz), 27.6 (t, <sup>2</sup>*J*<sub>C-F</sub> = 12.9, 8.0 Hz), 27.5, 13.7 ppm; <sup>19</sup>F NMR (376 MHz, CDCl<sub>3</sub>): δ = -133.4 (dd, <sup>2</sup>*J* = 149.8 Hz, *J*<sub>F-H</sub> = 12.8 Hz, CF<sub>a</sub>F<sub>b</sub>, 1F), -134.9 ppm (dd, <sup>2</sup>*J* = 149.8 Hz, *J*<sub>F-H</sub> = 13.4 Hz, CF<sub>a</sub>F<sub>b</sub>, 1F);  $\bar{\nu}$ /(film) = 2980, 1742, 1459, 1325, 1158, 1128



cm<sup>-1</sup>; MS (CI): *m/z* (%): 224 (17) [M-(F+CO<sub>2</sub>Et)+H]<sup>+</sup>, 196 (100) [M-(F+Boc)+H]<sup>+</sup>, 168 (29), 150 (72) [M-(*N*-Boc-pyrrolyl)+H]<sup>+</sup>; HRMS (APCI): calcd for C<sub>15</sub>H<sub>23</sub>F<sub>2</sub>N<sub>2</sub>O<sub>4</sub>, 333.1620 [M+NH<sub>4</sub>]<sup>+</sup> found 333.1623; *t<sub>R</sub>* (GC) = 12.07 minutes.

### Preparation of ethyl (1*S*\*,3*S*\*)-2,2-difluoro-3-(2'-thiazolyl)cyclopropane-1-carboxylate (15g)

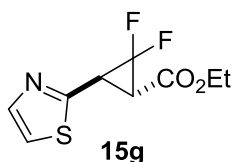

The preparation of ester **15g** was attempted from alkenoate **13g** (1.18 g, 6.4 mmol), MDFA (2.1 mL, 16.2 mmol), TMSCl (2.1 mL, 16.2 mmol), potassium iodide (3.0 g, 18 mmol) and diglyme (1.28 mL) according to general procedure B with a total reaction time of 4 hours. The resulting <sup>1</sup>H NMR of the resulting crude black solid showed diglyme and diethyl ether the desired product **15g** was not observed (0% conversion).

### Preparation of ethyl (1*S*\*,3*S*\*)-2,2-difluoro-3-(2'-furyl-3-methyl) cyclopropane-1-carboxylate (15h)

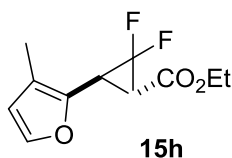

Ester **15h** was prepared from alkenoate **13h** (721 mg, 4.0 mmol), MDFA (1.3 mL, 10 mmol), TMSCl (1.3 mL, 10 mmol), potassium iodide (1.84 g, 12 mmol) and diglyme (0.7 mL) according to general procedure B. <sup>1</sup>H NMR of the resulting crude product showed 80% conversion to desired product. Column chromatography on silica gel (1:20 Et<sub>2</sub>O in hexane) afforded ester **15h** as a yellow oil (417 mg, 45%) and recovered alkenoate **13h** (136 mg, 19%). *R<sub>f</sub>* = 0.56 (1:4 Et<sub>2</sub>O in hexane); <sup>1</sup>H NMR (400 MHz, CDCl<sub>3</sub>): δ = 7.26 (d, *J* = 1.8 Hz, Ar*H*, 1H), 6.23 (d, *J* = 1.8 Hz, Ar*H*, 1H), 4.26 (q, *J* = 7.1 Hz, OCH<sub>2</sub>CH<sub>3</sub>, 2H), 3.67 (ddd, *J*<sub>H-F</sub> = 12.2, 2.3 Hz, *J* = 7.7 Hz, ArCH, 1H), 2.92 (dd, *J*<sub>H-F</sub> = 13.5 Hz, *J* = 7.7 Hz, HCCO<sub>2</sub>Et, 1H), 2.05 (s, ArCH<sub>3</sub>, 3H), 1.33 ppm (t, *J* = 7.1 Hz, CH<sub>2</sub>CH<sub>3</sub>, 3H); <sup>13</sup>C NMR (100 MHz, CDCl<sub>3</sub>): δ = 165.9, 141.4, 139.8, 119.0, 113.4, 110.1 (t, <sup>1</sup>*J*<sub>C-F</sub> = 294.1, 287.4 Hz), 61.9, 30.8 (t, *J*<sub>C-F</sub> = 11.0 Hz), 25.5 (dd, *J*<sub>C-F</sub> = 13.5, 9.5 Hz), 14.1, 9.6 ppm; <sup>19</sup>F NMR (376 MHz, CDCl<sub>3</sub>): δ = -132.8 (ddd, <sup>2</sup>*J* = 150.5 Hz, *J*<sub>F-H</sub> =

13.5, 2.3 Hz,  $CF_aF_b$ , 1F), -131.5 ppm (dd,  $^2J = 150.5$  Hz,  $J_{F-H} = 12.2$  Hz,  $CF_aF_b$ , 1F);  $\bar{\nu}$ /(film) = 2985, 1738, 1454, 1329, 1290, 1208, 1154, 1091, 1013, 989  $cm^{-1}$ ; MS (CI):  $m/z$  (%): 259 (6)  $[M+C_2H_5]^+$ , 231 (25)  $[M+H]^+$ , 211 (100)  $[M-F]^+$ , 203 (23), 185 (25)  $[M-OEt]^+$ , 183 (28); HRMS (APCI): calcd for  $C_{11}H_{11}F_2O_3$ , 229.0671  $[M-H]^+$  found 229.0676;  $t_R$  (GC) = 10.61 minutes.

### General Procedure C: Reduction of Difluorocyclopropyl Ethyl Esters

#### Preparation of ethyl ((1S\*,3S\*)-2,2-difluoro-3-(furan-2-yl)cyclopropyl)methanol (17a)

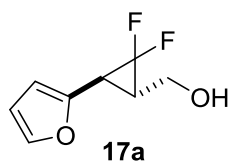

Diisobutylaluminium hydride (24 ml of a 1.1 M solution in cyclohexane, 23.7 mmol) was added dropwise to a solution of ester **15a** (1.71 g, 7.9 mmol) in anhydrous toluene (70 mL) under nitrogen at -78 °C over 10 minutes. The reaction mixture was allowed to warm to room temperature and stirred for a further 8 hours, then cooled to 0 °C and quenched by dropwise addition of H<sub>2</sub>O (2 mL), 0.1 M aqueous NaOH (2 mL) and H<sub>2</sub>O (2 mL) in that order. MgSO<sub>4</sub> was added to the quenched mixture until the solid was free flowing and the mixture was left overnight at room temperature (14-17 h). The resulting white emulsion was washed with EtOAc (4 x 50 mL) and the organic extracts were combined and concentrated under reduced pressure to afford alcohol **17a** as a pale yellow oil (1.3 g, 94%).  $R_f = 0.19$  (1:2 Et<sub>2</sub>O in hexane); <sup>1</sup>H NMR (400 MHz, CDCl<sub>3</sub>):  $\delta = 7.37$  (dd,  $J = 1.9$  Hz,  $^4J = 0.8$  Hz, ArH, 1H), 6.38 (dd,  $J = 3.3, 1.9$  Hz, ArH, 1H), 6.21 (br. d,  $J = 3.3$  Hz, ArH, 1H), 3.99-3.91 (br. m, CH<sub>OH</sub>, 1H), 3.90-3.83 (br. m, CH<sub>2</sub>OH, 1H), 2.64 (dd,  $J_{H-F} = 13.1$  Hz,  $J = 7.3$  Hz, ArCH, 1H), 2.32-2.23 (m, CHCH<sub>2</sub>O, 1H), 1.62 ppm (br. s, CH<sub>2</sub>OH, 1H); <sup>13</sup>C NMR (100 MHz, CDCl<sub>3</sub>):  $\delta = 146.6, 141.6, 112.1$  (t,  $^1J_{C-F} = 289.0$  Hz), 110.1, 106.9, 58.6 (d,  $J_{C-F} = 5.9$  Hz), 30.4 (t,  $^2J_{C-F} = 9.5$  Hz), 24.2 ppm (dd,  $^2J_{C-F} = 13.6, 10.6$  Hz); <sup>19</sup>F NMR (376 MHz, CDCl<sub>3</sub>):  $\delta = -135.5$  (ddd,  $^2J = 158.7$  Hz,  $J_{F-H} = 13.6, 2.0$  Hz, 1F), -138.3 ppm (dd,  $^2J = 158.8$  Hz,  $J_{F-H} = 13.1$  Hz, 1F);  $\bar{\nu}$ /(film) = 2926, 2359, 2342, 1458, 1263, 1167, 1009, 736  $cm^{-1}$ ; MS (CI):  $m/z$  (%): 175 (13)  $[M+H]^+$ , 157 (100)  $[M-OH]^+$ , 139 (13), 127 (12), 109 (18); HRMS (TOF): calcd for  $C_8H_8O_2F_2$ , 174.0492 [M] found 174.0496;  $t_R$  (GC) = 9.39 minutes.

### Preparation of ((1S\*,3R\*)-2,2-difluoro-3-(thiophen-2-yl)cyclopropyl)methanol (**17c**)

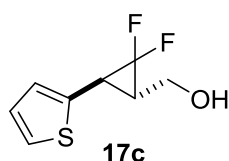

Alcohol **17c** was prepared from ester **15c** (272 mg, 0.85 mmol), DIBAL (2.3ml of a 1.1 M solution in cyclohexane, 2.55 mmol) and DCM (6 mL) according to general procedure B.  $^1\text{H}$  NMR of the result crude reaction mixture confirmed 83% conversion. Column chromatography on silica gel (2:3 Et<sub>2</sub>O in hexane) afforded alcohol **17c** as a yellow oil (81 mg, 50%).  $R_f = 0.19$  (1:2 Et<sub>2</sub>O in hexane);  $^1\text{H}$  NMR (400 MHz, CDCl<sub>3</sub>):  $\delta = 7.23$  (dd,  $J = 5.2$ ,  $^4J = 1.3$  Hz, ArH, 1H), 6.99 (dd,  $J = 5.2$ , 3.6 Hz, ArH, 1H), 6.95 (br. d,  $J = 3.6$  Hz, ArH, 1H), 3.94 (dddd,  $^2J = 12.1$  Hz,  $J = 6.6$ , 1.1 Hz,  $^4J_{\text{H-F}} = 2.7$  Hz, CH<sub>o</sub>H<sub>b</sub>OH, 1H), 3.84 (ddd,  $^2J = 12.1$  Hz,  $J = 7.8$ , 1.6 Hz, CH<sub>a</sub>H<sub>b</sub>OH, 1H), 2.77 (dd,  $J_{\text{H-F}} = 13.6$  Hz,  $J = 7.3$  Hz, ArCH, 1H), 2.33 (br. s, CH<sub>2</sub>OH, 1H), 2.17 ppm (dddd,  $J_{\text{H-F}} = 13.4$  Hz,  $J = 7.8$ , 7.4, 6.6 Hz,  $^4J = 0.9$  Hz, CHCH<sub>2</sub>OH, 1H);  $^{13}\text{C}$  NMR (100 MHz, CDCl<sub>3</sub>):  $\delta = 135.1$ , 126.5, 125.4, 124.2, 112.7 (t,  $^1J_{\text{C-F}} = 290.1$  Hz), 58.7 (d,  $J_{\text{C-F}} = 5.7$  Hz), 32.9 (t,  $^2J_{\text{C-F}} = 9.6$  Hz), 26.1 ppm (dd,  $^2J_{\text{C-F}} = 12.5$ , 11.1 Hz);  $^{19}\text{F}$  NMR (376 MHz, CDCl<sub>3</sub>):  $\delta = -135.4$  (ddd,  $^2J = 158.0$  Hz,  $J_{\text{F-H}} = 13.5$  Hz,  $^4J_{\text{F-H}} = 2.7$  Hz, 1F), -137.5 ppm (dd,  $^2J = 158.0$  Hz,  $J_{\text{F-H}} = 13.5$  Hz, 1F);  $\bar{\nu}/(\text{film}) = 3324$ , 2930, 2885, 1472, 1435, 1245, 1080, 1037, 1007 cm<sup>-1</sup>; MS (CI):  $m/z$  (%): 219 (6) [M+C<sub>2</sub>H<sub>5</sub>]<sup>+</sup>, 191 (26) [M+H]<sup>+</sup>, 173 (100) [M-OH]<sup>+</sup>, 153 (42) [M-F<sub>2</sub>]<sup>+</sup>, 123 (22); HRMS (ASAP): calcd for C<sub>8</sub>H<sub>7</sub>F<sub>2</sub>S<sub>1</sub>, 173.0231 [M-H<sub>2</sub>O+H]<sup>+</sup> found 173.0229;  $t_R$  (GC) = 10.51 minutes.

### Preparation of ((1S\*,3R\*)-2,2-difluoro-3-(benzo[d][1,3]dioxol-5-yl)cyclopropyl)methanol (**17d**)

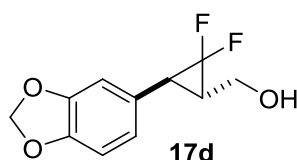

Alcohol **17d** was prepared from ester **15d** (550 mg, 2 mmol), DIBAL (1.0 M in cyclohexane, 6.0 mL, 6 mmol) and toluene (30 mL) according to general procedure C. Column chromatography on silica gel (1:1 Et<sub>2</sub>O in hexane) afforded desired alcohol **17d** as a colourless oil (342 mg, 75%).  $R_f = 0.35$  (1:1 Et<sub>2</sub>O in hexane);  $^1\text{H}$  NMR (400 MHz, CDCl<sub>3</sub>):  $\delta =$

6.80-6.72 (m, ArH, 3H), 5.97 (s, OCH<sub>2</sub>O, 2H), 3.95-3.83 (m, CHCH<sub>2</sub>OH, 2H), 2.57 (ddd,  $J_{H-F} = 11.2$  Hz,  $J = 7.6$  Hz,  $^4J = 3.3$  Hz, ArCH, 1H), 2.12 (dddd,  $J_{H-F} = 11.2$  Hz,  $J = 7.6, 7.5, 7.1$  Hz,  $^4J = 3.3$  Hz, CHCH<sub>2</sub>OH, 1H), 1.92 ppm (br. s, CH<sub>2</sub>OH, 1H); <sup>13</sup>C NMR (100 MHz, CDCl<sub>3</sub>):  $\delta = 147.3, 146.4, 126.1, 121.1, 113.1$  (t,  $^1J_{C-F} = 289.1$  Hz), 108.0, 107.8, 100.6, 59.1 (d,  $J_{C-F} = 4.3$  Hz), 30.8 (t,  $^2J_{C-F} = 9.1$  Hz), 30.7 ppm (t,  $^2J_{C-F} = 11.1$  Hz); <sup>19</sup>F NMR (376 MHz, CDCl<sub>3</sub>):  $\delta = -136.5$  (ddd,  $^2J = 158.2$  Hz,  $J_{F-H} = 10.8$  Hz,  $^4J_{F-H} = 4.2$  Hz, CHCF<sub>a</sub>F<sub>b</sub>CHCH<sub>2</sub>, 1F), -136.6 ppm (ddt,  $^2J = 157.8$  Hz,  $J_{F-H} = 10.8$  Hz,  $^4J_{F-H} = 3.7$  Hz, CHCF<sub>a</sub>F<sub>b</sub>CHCH<sub>2</sub>, 1F). Reported chemical shifts are representative of an AB system;  $\bar{\nu}$ /(film) = 3292, 1495, 1476, 1437, 1236, 1167, 1036, 1011, 930 cm<sup>-1</sup>; MS (CI):  $m/z$  (%): 269 (2) [M+C<sub>3</sub>H<sub>5</sub>]<sup>+</sup>, 257 (10) [M+C<sub>2</sub>H<sub>5</sub>]<sup>+</sup>, 229 (32) [M+H]<sup>+</sup>, 211 (100) [M-OH]<sup>+</sup>, 191 (90) [(M+H)-F<sub>2</sub>]<sup>+</sup>, 181 (48), 161 (74), 131 (26); HRMS (APCI): calcd for C<sub>11</sub>H<sub>11</sub>F<sub>2</sub>O<sub>3</sub>, 229.0671 [M+H]<sup>+</sup> found 229.0668; t<sub>R</sub> (GC) = 12.96 minutes.

**Preparation of ((1S\*,3R\*)-2,2-difluoro-3-(2'-pyrrolyl-1-carboxylic acid tert-butyl ester)methanol (17f)**

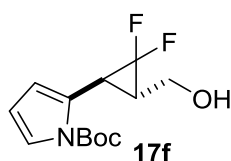

Alcohol **17f** was prepared from ester **15f** (600 mg, 1.9 mmol), DIBAL (1.0 M in cyclohexane, 5.7 mL, 5.7 mmol) and toluene (40 mL) according to general procedure C. Column chromatography on silica gel (1:1 Et<sub>2</sub>O in hexane) afforded desired alcohol **17f** as a pale yellow oil (30 mg, 6%). R<sub>f</sub> = 0.32 (1:1 Et<sub>2</sub>O in hexane); <sup>1</sup>H NMR (400 MHz, CDCl<sub>3</sub>):  $\delta = 7.23$  (ddd,  $J = 3.4$  Hz,  $^4J = 1.8$  Hz,  $^5J = 0.8$  Hz, ArH, 1H), 6.25 (m, ArH, 1H), 6.14 (t,  $J = 3.4$  Hz, ArH, 1H), 3.98 (ddd,  $^2J = 12.0$  Hz,  $J = 5.7, 1.8$  Hz, CHCH<sub>a</sub>H<sub>b</sub>OH, 1H), 3.74 (dt,  $^2J = 11.9$  Hz,  $J = 1.8$  Hz, CHCH<sub>a</sub>H<sub>b</sub>OH, 1H), 2.96 (br. s, OH, 1H), 2.86 (dd,  $^3J_{H-F} = 15.3$  Hz,  $J = 7.3$  Hz, ArCH, 1H), 1.99 (m, CHCH<sub>2</sub>OH, 1H), 1.63 ppm (s, OC(CH<sub>3</sub>)<sub>3</sub>, 9H); <sup>13</sup>C NMR (100 MHz, CDCl<sub>3</sub>):  $\delta = 149.3, 126.5, 121.2, 113.3$  (dd,  $^1J_{C-F} = 290.3, 287.3$  Hz), 112.3 (d,  $^4J_{C-F} = 3,3$  Hz), 110.0, 84.2, 59.0 (d,  $J_{C-F} = 4.4$  Hz), 32.9 (t,  $^2J_{C-F} = 9.3$  Hz), 23.5, 23.3 ppm (dd,  $^2J_{C-F} = 13.0, 9.6$  Hz); <sup>19</sup>F NMR (376 MHz, CDCl<sub>3</sub>):  $\delta = -132.6$  (dd,  $^2J = 160.0$  Hz,  $J_{F-H} = 13.6$  Hz, CF<sub>a</sub>F<sub>b</sub>, 1F), -134.7 ppm (dd,  $^2J = 159.0$  Hz,  $J_{F-H} = 15.1$  Hz, CF<sub>a</sub>F<sub>b</sub>, 1F);  $\bar{\nu}$ /(film) = 3443, 2982, 2835, 1740, 1478, 1405, 1372, 1323, 1260, 1164, 1128 cm<sup>-1</sup>; MS (CI):  $m/z$  (%): 180 (23), 152 (100); t<sub>R</sub> (GC) = 10.12 minutes. Due to lack of  $m/z$  consistent with product accurate mass analysis was not attempted.

### Preparation of ((1S\*,3R\*)-2,2-difluoro-3-(2'-furyl-3-methyl)cyclopropyl)methanol (**17h**)

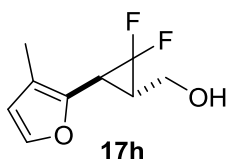

Alcohol **17h** was prepared from ester **15h** (234 mg, 1.0 mmol), DIBAL (1.0 M in cyclohexane, 3.0 mL, 3.0 mmol) and toluene (6.2 mL) according to general procedure C to afford desired alcohol **17h** as a pale yellow oil (160 mg, 84%).  $R_f = 0.21$  (1:1 Et<sub>2</sub>O in hexane); <sup>1</sup>H NMR (400 MHz, CDCl<sub>3</sub>):  $\delta = 7.25$  (d,  $J = 1.8$  Hz, ArH, 1H), 6.22 (d,  $J = 1.8$  Hz, ArH, 1H), 3.97-3.84 (br. m., CHCH<sub>2</sub>OH, 2H), 2.52 (dd,  $J_{H-F} = 12.7$ ,  $J = 7.3$  Hz, ArCH, 1H), 2.40 (dddd,  $J_{H-F} = 13.9$ , 2.0 Hz,  $J = 7.6$ , 7.3, 6.4 Hz), 2.04 (s, ArCH<sub>3</sub>, 3H), 1.62 ppm (br. s, OH, 1H); <sup>13</sup>C NMR (100 MHz, CDCl<sub>3</sub>):  $\delta = 141.5$ , 141.0, 118.2, 113.3, 113.0 (t,  $^1J_{C-F} = 289.0$  Hz), 59.1 (d,  $J_{C-F} = 5.6$  Hz), 29.5 (t,  $^2J_{C-F} = 9.5$  Hz), 23.4 (dd,  $^2J_{C-F} = 13.4$ , 10.8 Hz), 9.6 ppm; <sup>19</sup>F NMR (376 MHz, CDCl<sub>3</sub>):  $\delta = -134.8$  (ddd,  $^2J = 157.3$  Hz,  $J_{F-H} = 13.9$ , 2.2 Hz, CF<sub>a</sub>F<sub>b</sub>, 1F), -138.4 ppm (dd,  $^2J = 157.3$  Hz,  $J_{F-H} = 12.7$  Hz, CF<sub>a</sub>F<sub>b</sub>, 1F);  $\bar{\nu}$ /(film) = 3333, 2928, 2887, 1632, 1455, 1271, 1180, 1041, 1013 cm<sup>-1</sup>; MS (CI):  $m/z$  (%): 189 (9) [M+H]<sup>+</sup>, 171 (100) [M-OH]<sup>+</sup>, 153 (16), 121 (14); HRMS (APCI): calcd for C<sub>9</sub>H<sub>9</sub>F<sub>2</sub>O<sub>1</sub>, 171.0616 [M-H<sub>2</sub>O+H]<sup>+</sup> found 171.0615;  $t_R$  (GC) = 9.99 minutes.

### Preparation of (1S\*,3S\*)-2,2-difluoro-3-phenylcyclopropane-1-carbaldehyde (**18b**)

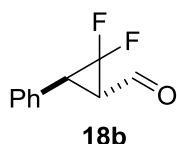

BAIB (3.0 g, 9.3 mmol) was added to a solution of ((1S\*,3S\*)-2,2-difluoro-3-phenylcyclopropyl)methanol (**17b**) (1.58 g, 8.6 mmol) and TEMPO (133 mg, 0.9 mmol) in anhydrous DCM (45 mL) and the reaction mixture was stirred at room temperature under nitrogen for 6 hours. The <sup>1</sup>H NMR spectrum showed complete conversion to aldehyde **18b**. Kugelrohr distillation (50 °C, 20 mbar) removed iodobenzene side product then (60 °C, 0.1 mbar) afforded aldehyde **18b** as a pale yellow oil (1.17 g, 75%).  $R_f = 0.26$  (1:4 Et<sub>2</sub>O in hexane); <sup>1</sup>H NMR (400 MHz, CDCl<sub>3</sub>):  $\delta = 9.51$  (dd,  $J = 4.4$  Hz,  $^4J = 2.0$  Hz, C(O)H, 1H), 7.42-7.34 (m, ArH, 3H), 7.29-7.27 (m, ArH, 2H), 3.63 (ddd,  $J_{H-F} = 14.8$  Hz,  $J = 7.6$  Hz,  $^4J = 2.1$  Hz, ArCH, 1H), 2.97 (ddd,  $J_{H-F} = 12.8$  Hz,  $J = 7.5$ , 4.4 Hz, CHC(O)H, 1H); <sup>13</sup>C NMR (100 MHz, CDCl<sub>3</sub>):  $\delta =$

191.8 (d,  $J_{C-F} = 3.9$  Hz), 130.0, 128.4, 127.8, 127.6, 111.0 (t,  $^2J_{C-F} = 291.3$  Hz), 40.3 (t,  $J_{C-F} = 40.4$  Hz), 32.8 ppm (dd,  $J_{C-F} 12.1, 8.8$  Hz);  $^{19}\text{F}$  NMR (376 MHz,  $\text{CDCl}_3$ ):  $\delta = -129.4$  (dd,  $^2J = 158.0$  Hz,  $J_{F-H} = 15.0$  Hz, 1F),  $-133.4$  ppm (dd,  $^2J = 157.9$  Hz,  $J_{F-H} = 12.9$  Hz, 1F);  $\bar{\nu}$ /(film) = 1738, 1634, 1059, 980  $\text{cm}^{-1}$ ; MS (CI):  $m/z$  (%): 183 (11)  $[\text{M}+\text{H}]^+$ , 163 (73)  $[\text{M}-\text{F}]^+$ , 135 (100)  $[(\text{M}+\text{H})-\text{F}-\text{CO}]$ , 115 (24)  $[(\text{M}+\text{H})-\text{F}_2-\text{CO}]$ ; HRMS (APCI): calcd for  $\text{C}_{10}\text{H}_9\text{F}_2\text{O}$ , 183.0616  $[\text{M}+\text{H}]^+$  found 183.0615;  $t_R$  (GC) = 10.03 minutes.

#### General Procedure D: Tandem Oxidation/Olefination of Difluorocyclopropyl Alcohols

Preparation of (*E*)-3-((1*R*\*,3*S*\*)-2,2-difluoro-3-phenylcyclopropyl)-*N*-methoxy-*N*-methylacrylamide (**19a**) and (*Z*)-3-((1*R*\*,3*S*\*)-2,2-difluoro-3-phenylcyclopropyl)-*N*-methoxy-*N*-methylacrylamide (**19b**)

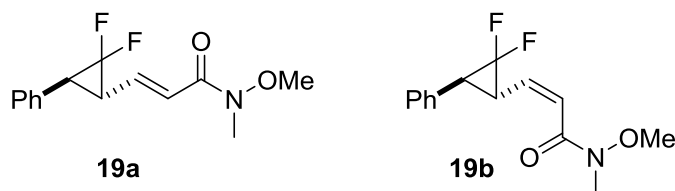

*Bis*(acetoxy)iodobenzene (BAIB, 304 mg, 0.92 mmol) was added to a solution of alcohol **17b** (148 mg, 0.8 mmol) and TEMPO (12 mg, 0.08 mmol) in anhydrous DCM (3.2 mL) and the reaction mixture was stirred at room temperature under nitrogen for 6 hours. The  $^1\text{H}$  NMR spectrum showed complete conversion to the corresponding aldehyde. *N*-methoxy-*N*-methyl(triphenylphosphoranylidene)acetamide (378 mg, 1.04 mmol) was then added, and the reaction mixture stirred for 16 hours until the  $^1\text{H}$  or  $^{19}\text{F}$  NMR spectrum showed complete conversion. The resulting orange solution was concentrated under reduced pressure and column chromatography on silica gel (1:1 to 3:2 diethyl ether in hexane) afforded **19a** (157 mg, 74%) as a pale yellow solid and **19b** (25 mg, 9%) as a yellow oil. Data for **19a**: m.p. = 52–55 °C (chloroform/pentane);  $R_f = 0.14$  (1:1  $\text{Et}_2\text{O}$  in hexane);  $^1\text{H}$  NMR (400 MHz,  $\text{CDCl}_3$ ):  $\delta = 7.39$ – $7.31$  (m, ArH, 3H),  $7.30$ – $7.25$  (m, ArH, 2H),  $6.82$  (dd,  $J = 15.6, 9.6$  Hz, CHCH=CH, 1H),  $6.69$  (d,  $J = 15.4$  Hz, CH=CHCO, 1H),  $3.74$  (s,  $\text{OCH}_3$ , 3H),  $3.28$  (s,  $\text{NCH}_3$ , 3H),  $2.91$  (dd,  $J_{H-F} = 14.6$  Hz,  $J = 7.1$  Hz, ArCHCF<sub>2</sub>CH, 1H),  $2.70$  ppm (ddd,  $J_{H-F} = 13.1$  Hz,  $J = 9.6, 7.2$  Hz, CHCH, 1H);  $^{13}\text{C}$  NMR (100 MHz,  $\text{CDCl}_3$ ):  $\delta = 165.3, 138.5$  (d,  $^4J_{C-F} = 4.8$  Hz),  $132.1, 128.2, 127.4, 127.1, 120.6, 112.9$  (t,  $^1J_{C-F} = 292.7$  Hz),  $61.3, 35.6$  (dd,  $J_{C-F} = 11.2, 9.0$  Hz),  $33.8$  (t,  $J_{C-F} = 11.5$ ),  $31.9$  ppm;  $^{19}\text{F}$  NMR (376 MHz,  $\text{CDCl}_3$ ):  $\delta = -130.5$  (dd,  $^2J = 156.1$  Hz,  $J_{F-H} = 14.1$  Hz, 1F),  $-135.7$  ppm

(dd,  $^2J = 156.0$  Hz,  $J_{F-H} = 13.5$  Hz, 1F);  $\bar{\nu}/(\text{film}) = 1661, 1630, 1383, 1273, 1152, 986$  cm $^{-1}$ ; MS (CI):  $m/z$  (%): 288 (8) [(M-F)+C $_3$ H $_5$ ] $^+$ , 276 (9) [(M-F)+C $_2$ H $_5$ ] $^+$ , 248 (100) [M-F] $^+$ ; HRMS (APCI): calcd for C $_{14}$ H $_{16}$ F $_2$ NO $_2$ , 268.1144 [M+H] $^+$  found 268.1145;  $t_R$  (GC) = 11.30 minutes. Data for **19b**:  $R_f = 0.33$  (1:1 Et $_2$ O in hexane);  $^1\text{H}$  NMR (400 MHz, CDCl $_3$ ):  $\delta = 7.36$ -7.34 (m, ArH, 4H), 7.32-7.27 (m, ArH, 1H), 6.53 (d,  $J = 11.4$  Hz, CH=CHCO, 1H), 5.95 (dddd,  $J = 11.4, 10.1$  Hz,  $^4J_{H-F} = 1.4, 1.3$  Hz, CHCH=CH, 1H), 4.29 (br. ddd,  $J_{H-F} = 14.0$  Hz,  $J = 10.1, 7.2$  Hz, CHCH=CH, 1H), 3.74 (s, OCH $_3$ , 3H), 3.27 (s, NCH $_3$ , 3H), 2.81 (dd,  $J_{H-F} = 14.9$  Hz,  $J = 7.2$  Hz, ArCHCF $_2$ CH, 1H);  $^{13}\text{C}$  NMR (100 MHz, CDCl $_3$ ):  $\delta = 166.2$  (d,  $^5J_{C-F} = 3.7$  Hz), 133.3 (d,  $^4J_{C-F} = 6.0$  Hz), 131.8, 128.1, 127.7, 126.9, 119.0, 113.7 (t,  $^1J_{C-F} = 291.3$  Hz), 61.3, 36.1 (dd,  $^2J = 11.5, 8.9$  Hz), 31.5, 29.8 ppm (dd,  $^2J = 13.2, 9.8$  Hz);  $^{19}\text{F}$  NMR (376 MHz, CDCl $_3$ ):  $\delta = -132.6$  (dd,  $^2J = 153.9$  Hz,  $J_{F-H} = 14.8$  Hz, 1F), -136.3 ppm (dd,  $^2J = 153.8$  Hz,  $J_{F-H} = 14.0$  Hz, 1F);  $\bar{\nu}/(\text{film}) = 2982, 2360, 2343, 1656, 1627, 1425, 1354, 1252, 1169, 1001$  cm $^{-1}$ ; MS (CI):  $m/z$  (%): 296 (12) [M+C $_2$ H $_5$ ] $^+$ , 268 (52) [M+H] $^+$ , 248 (100) [M-F] $^+$ , 217 (8) [M-(F-OMe)], 187 (8); HRMS (APCI): calcd for C $_{14}$ H $_{16}$ F $_2$ NO $_2$ , 268.1144 [M+H] $^+$  found 268.1145;  $t_R$  (GC) = 13.37 minutes.

#### Preparation of ethyl (*E*)-3-((1*R*\*,3*S*\*)-2,2-difluoro-3-phenylcyclopropyl)-2-methylacrylate (**20a**)

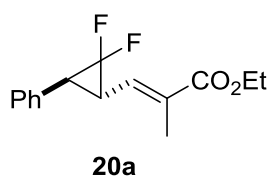

Ester **20a** was prepared from alcohol **17b** (340 mg, 1.47 mmol), TEMPO (26 mg, 0.47 mmol), BAIB (512 mg, 1.62 mmol), (carbethoxyethylidene)triphenylphosphorane (692 mg, 1.9 mmol) and anhydrous DCM (10 mL) according to general procedure D with an oxidation time of 4 hours and an olefination time of 17 hours. Column chromatography on silica gel (1:19 Et $_2$ O in hexane) afford ester **20a** as a yellow oil (290 mg, 74%);  $R_f = 0.47$  (1:4 Et $_2$ O in hexane);  $^1\text{H}$  NMR (400 MHz, CDCl $_3$ ):  $\delta = 7.39$ -7.30 (m, ArH, 3H), 7.29-7.25 (m, ArH, 2H), 6.59 (ddd,  $J = 9.7$  Hz,  $^4J_{H-F} = 3.0$  Hz,  $^4J = 1.5$  Hz, CH=CCH $_3$ , 1H), 4.25 (q,  $J = 7.2$  Hz, OCH $_2$ CH $_3$ , 2H), 2.86 (dd,  $J_{H-F} = 14.9$  Hz,  $J = 7.2$  Hz, ArCHCF $_2$ CH, 1H), 2.70 (ddd,  $J_{H-F} = 13.3$  Hz,  $J = 9.7, 7.3$  Hz, CHCH=CH $_3$ , 1H), 2.00 (d,  $^4J = 1.2$  Hz, CH=C(CH $_3$ ), 3H), 1.34 ppm (t,  $J = 7.2$  Hz, OCH $_2$ CH $_3$ , 3H);  $^{13}\text{C}$  NMR (100 MHz, CDCl $_3$ ):  $\delta = 167.2, 133.4$  (d,  $^4J_{C-F} = 4.9$  Hz) 132.6, 130.8, 128.7, 127.9, 127.6, 113.8 (t,  $^1J_{C-F} = 292.5$  Hz), 60.8, 36.2 (dd,  $^2J_{C-F} = 11.8, 9.6$  Hz), 31.2 (t,  $^2J_{C-F} = 11.2$  Hz),

14.3, 13.1 ppm;  $^{19}\text{F}$  NMR (376 MHz,  $\text{CDCl}_3$ ):  $\delta = -130.73$  (dd,  $^2J = 154.4$  Hz,  $J_{\text{F-H}} = 14.6$  Hz, 1F),  $-135.5$  (dd,  $^2J = 154.8$  Hz,  $J_{\text{F-H}} = 13.5$  Hz, 1F);  $\bar{\nu}$ /(film) = 2984, 2359, 2342, 1705, 1441, 1259  $\text{cm}^{-1}$ ; MS (CI):  $m/z$  (%): 275 (8)  $[(\text{M-F})+\text{C}_2\text{H}_5]^+$ , 247 (100),  $[\text{M-F}]^+$ , 219 (11),  $[(\text{M+H})-\text{F-Et}]$ , 201 (20), 173 (39); HRMS (APCI): calcd for  $\text{C}_{15}\text{H}_{17}\text{F}_2\text{O}_2$ , 267.1191  $[\text{M+H}]^+$  found 267.1192;  $t_{\text{R}}$  (GC) = 12.46 minutes.

**Preparation of ethyl (*E*)-3-((1*R*\*,3*S*\*)-2,2-difluoro-3-phenylcyclopropyl)acrylonitrile (**21a**) and (*Z*)-3-((1*R*\*,3*S*\*)-2,2-difluoro-3-phenylcyclopropyl)acrylonitrile (**21b**) mixture**

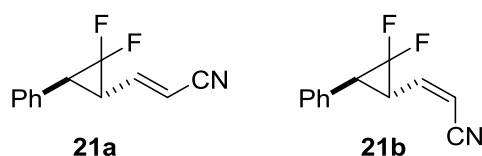

(Triphenylphosphoranylidene)acetonitrile (536 mg, 1.8 mmol) was added to a colourless solution of aldehyde **18b** (250 mg, 1.37 mmol) in anhydrous DCM (6 mL) at room temperature under nitrogen. The resulting yellow reaction mixture changed to a red solution after being stirred for 2.5 hours. The reaction mixture was concentrated under reduced pressure and the resulting  $^1\text{H}$  NMR of crude product confirmed complete conversion of **18b**. Column chromatography on silica gel (1:4  $\text{Et}_2\text{O}$  in hexane) afforded a 3:2 diastereoisomeric mixture of cyano-**21a** and **21b** (237 mg, 84%). Mixed data for **21a** and **21b**:  $R_f = 0.29$  (1:4  $\text{Et}_2\text{O}$  in hexane); HRMS (APCI): calcd for  $\text{C}_{12}\text{H}_{10}\text{F}_2\text{N}$ , 206.0776  $[\text{M+H}]^+$  found 206.0774;  $\bar{\nu}$ /(film) = 3291, 2912, 1495, 1476, 1437, 1236, 1167, 1103, 1036, 1011, 930  $\text{cm}^{-1}$ ; Extracted data for **21a**:  $^1\text{H}$  NMR (400 MHz,  $\text{CDCl}_3$ ):  $\delta = 7.42$ -7.24 (m, ArH, 5H), 6.53 (ddt,  $J = 16.3, 9.6$  Hz,  $^4J_{\text{H-F}} = 1.3$  Hz,  $\text{CH}=\text{CHCN}$ , 1H), 5.60 (d,  $J = 16.4$  Hz,  $\text{CH}=\text{CHCN}$ , 1H), 3.00-2.93 (m, ArCH, 1H), 2.65 ppm (ddd,  $J_{\text{H-F}} = 12.3$  Hz,  $J = 9.6, 7.2$  Hz,  $\text{CHCH}=\text{CH}$ , 1H);  $^{13}\text{C}$  NMR (100 MHz,  $\text{CDCl}_3$ ):  $\delta = 146.9$  (d,  $^4J_{\text{C-F}} = 4.9$  Hz), 131.5, 128.9, 128.1, 127.9, 116.8, 112.8 (t,  $^1J_{\text{C-F}} = 293.6$  Hz), 101.8, 36.4 (dd,  $^2J_{\text{C-F}} = 11.9, 9.6$  Hz), 34.2 ppm (t,  $^2J_{\text{C-F}} = 11.6$  Hz);  $^{19}\text{F}$  NMR (376 MHz,  $\text{CDCl}_3$ ):  $\delta = -129.9$  (dd,  $^2J = 158.1$  Hz,  $J_{\text{F-H}} = 15.3$  Hz, 1F),  $-135.5$  ppm (dd,  $^2J = 158.1$  Hz,  $J_{\text{F-H}} = 12.10$  Hz, 1F); MS (CI):  $m/z$  (%): 246 (11)  $[\text{M}+\text{C}_3\text{H}_5]^+$ , 234 (23)  $[\text{M}+\text{C}_2\text{H}_5]^+$ , 206 (94)  $[\text{M+H}]^+$ , 186 (100)  $[\text{M-F}]^+$ ;  $t_{\text{R}}$  (GC) = 11.45 minutes. Extracted data for **21b**:  $^1\text{H}$  NMR (400 MHz,  $\text{CDCl}_3$ ):  $\delta = 7.42$ -7.24 (m, ArH, 5H), 6.32 (ddt,  $J = 11.0, 9.8$  Hz,  $^4J_{\text{H-F}} = 1.1$  Hz,  $\text{CHCH}=\text{CHCN}$ , 1H), 5.55 (d,  $J = 11.1$  Hz,  $\text{CH}=\text{CHCN}$ , 1H), 3.09 (ddd,  $J_{\text{H-F}} = 12.3$  Hz,  $J = 9.8, 6.9$  Hz,  $\text{CHCH}=\text{CH}$ , 1H), 3.00-2.93 ppm (m, ArCH, 1H);  $^{13}\text{C}$  NMR (100 MHz,  $\text{CDCl}_3$ ):  $\delta = 146.2$  (d,  $^4J_{\text{C-F}} =$



5.4 Hz), 131.2, 128.9, 128.1, 127.9, 115.8, 112.8 (t,  $^1J_{C-F} = 293.1$  Hz), 101.4, 36.6 (d,  $^2J_{C-F} = 11.8, 9.22$ ), 33.1 ppm (d,  $^2J_{C-F} = 13.3, 10.4$ );  $^{19}F$  NMR (376 MHz,  $CDCl_3$ ):  $\delta = -130.0$  (dd,  $^2J = 156.9, J_{H-F} = 15.0$  Hz, 1F),  $-135.8$  ppm (dd,  $^2J = 156.9, J_{H-F} = 12.2$  Hz, 1F); MS (CI):  $m/z$  (%): 246 (6)  $[M+C_3H_5]^+$ , 234 (15)  $[M+C_2H_5]^+$ , 206 (22)  $[M+H]^+$ , 186 (100)  $[M-F]^+$ ;  $t_R$  (GC) = 11.86 minutes.

**Preparation of ethyl (*E*)-3-((1*R*\*,3*S*\*)-3-(benzo[d][1,3]dioxol-5-yl)-2,2-difluorocyclopropyl)acrylate (**22a**) and of ethyl (*Z*)-3-((1*R*\*,3*S*\*)-3-(benzo[d][1,3]dioxol-5-yl)-2,2-difluorocyclopropyl)acrylate (**22b**)**

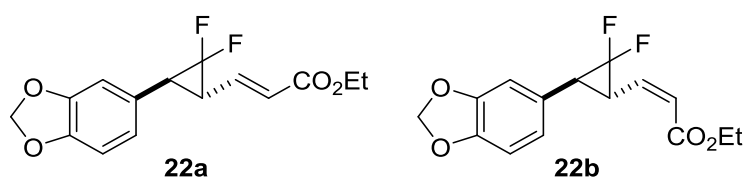

Ester **22a** was prepared from alcohol **17d** (36.5 mg, 0.16 mmol), TEMPO (3.7 mg, 0.02 mmol), BAIB (57 mg, 0.18 mmol), (ethoxycarbonylmethylene)triphenylphosphorane (85 mg, 0.21 mmol) and anhydrous DCM (2 mL) according to General Procedure D with an oxidation time of 4 hours and an olefination time of 4 hours. Column chromatography on silica gel (1:9 diethyl ether in hexane) afforded **22a** (23.5 mg, 50%) and a mixture of **22a** and **22b** (10 mg, 21%) as pale yellow oils. Data for **22a**:  $R_f = 0.25$  (1:4  $Et_2O$  in hexane);  $^1H$  NMR (400 MHz,  $CDCl_3$ ):  $\delta = 6.81$ - $6.72$  (m, ArH, 3H), 6.77 (dd,  $J = 15.3, 8.9$  Hz,  $CH=CHCO_2Et$ , 1H), 6.08 (d,  $J = 15.5$  Hz,  $CH=CHCO_2Et$ , 1H), 5.98 (s,  $OCH_2O$ , 2H), 4.23 (q,  $J = 7.1$  Hz,  $OCH_2CH_3$ , 2H), 2.84 ( $J_{H-F} = 14.7$  Hz,  $J = 7.1$  Hz, ArCH, 1H), 2.54 (ddd,  $J_{H-F} = 13.0$  Hz,  $J = 8.9, 7.1$  Hz,  $CHCH=CH$ , 1H), 1.33 (t,  $J = 7.1$  Hz,  $OCH_2CH_3$ , 3H);  $^{13}C$  NMR (100 MHz,  $CDCl_3$ ):  $\delta = 165.2, 147.5, 146.7, 139.8$  (d,  $J_{C-F} = 4.7$  Hz), 125.2, 123.1, 121.2, 112.7 (t,  $^1J_{C-F} = 292.4$  Hz), 107.9, 107.7, 100.8, 60.1, 35.2 (dd,  $^2J_{C-F} = 12.1, 9.3$  Hz), 33.4 (t,  $^2J_{C-F} = 11.7$  Hz), 13.7 ppm;  $^{19}F$  NMR (376 MHz,  $CDCl_3$ ):  $\delta = -130.6$  (dd,  $^2J = 156.5$  Hz,  $J_{F-H} = 14.7$  Hz, 1F),  $-135.5$  (dd,  $^2J = 156.2$  Hz,  $J_{F-H} = 13.0$  Hz, 1F);  $\bar{\nu}$ /(film) = 2924, 2359, 2342, 1715, 1505, 1493, 1445, 1256, 1188 1165, 1096, 1038, 1018, 789  $cm^{-1}$ ; MS (CI):  $m/z$  (%): 325 (4)  $[M+C_2H_5]^+$ , 305 (9)  $[(M-F)+C_2H_5]^+$ , 277 (100)  $[M-F]^+$ , 259 (11)  $[M-F_2]^+$ , 231 (44), 203 (24), 175 (5); HRMS (APCI): calcd for  $C_{15}H_{18}F_2O_4N$ , 314.1198  $[M+NH_4]^+$  found 314.1199;  $t_R$  (GC) = 14.30 minutes. Extracted Data for **22b**:  $R_f = 0.40$  (1:4  $Et_2O$  in hexane);  $^{19}F$  NMR (376 MHz,  $CDCl_3$ ):  $\delta = -132.5$  (dd,  $^2J = 154.4$  Hz,  $J_{F-H} = 14.8$  Hz, 1F),  $-136.1$  (dd,  $^2J = 153.6$  Hz,  $J_{F-H} = 13.5$  Hz, 1F).

Attempted preparation of ethyl (*E*)-3-((1*R*\*,3*S*\*)-2,2-difluoro-3-(furan-2-yl)cyclopropyl)acrylate (**23a/23b**)

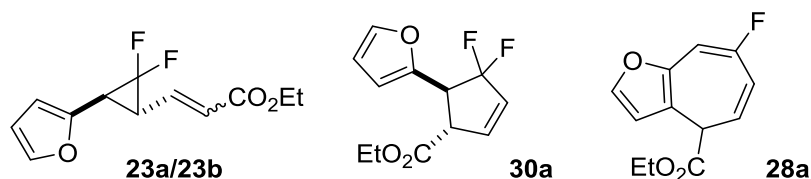

The synthesis of ester **23a** was attempted from alcohol **17a** (1.33 g, 7.6 mmol), BAIB (2.67 mg, 8.36 mmol), TEMPO (60 mg, 1.52 mmol), (ethoxycarbonylmethylene)-triphenylphosphorane (5.3 g, 9.8 mmol) and DCM (30 mL) according to general procedure D with an oxidation time of 3 h and olefination time of 16 h. The  $^{19}\text{F}$  NMR of the resulting crude reaction mixture confirmed complete consumption of **17a**. Column chromatography on silica gel (1:19 Et<sub>2</sub>O in hexane) afforded a set of fractions containing rearrangement product **28a** with trace amounts of difluorocyclopentene **30a** (1.06 g, 80%) as a pale yellow oil. Further purification attempts failed as isolated compounds showed signs of decomposition (solution turned black). No evidence of ester **23** was observed during the reaction and initial purification, consistent with rearrangement occurring at room temperature.  $^1\text{H}$  and  $^{19}\text{F}$  NMR spectra are consistent with heptadiene **28a** and show similarities with the corresponding thiophene based product (**29a**) which was fully characterised (*vide infra*). Extracted data for **28a**:  $R_f = 0.38$  (1:4 Et<sub>2</sub>O in hexane);  $^1\text{H}$  NMR (400 MHz, CDCl<sub>3</sub>):  $\delta = 7.54$  (d,  $J = 2.0$  Hz, ArH, 1H), 6.57 (dddd,  $J_{\text{H-F}} = 15.2$  Hz,  $^4J = 2.0$  Hz,  $^5J = 0.7, 0.5$  Hz, C-CH=CF, 1H), 6.28 (dd,  $J = 2.0$  Hz,  $^4J = 0.6$  Hz, ArH, 1H), 6.17 (dddd,  $J_{\text{H-F}} = 11.5$  Hz,  $J = 10.7$  Hz,  $^4J = 2.0$  Hz, 0.5 Hz, (F)CCH=CH, 1H), 5.89 (ddd,  $J = 10.7, 7.2$  Hz,  $^4J_{\text{H-F}} = 4.1$  Hz,  $^5J = 0.5$  Hz), 4.23 (ABq,  $J = 7.4$  Hz,  $^2J = 1.4$  Hz, OCH<sub>a</sub>H<sub>b</sub>CH<sub>3</sub>, 2H), 4.18 (br. d,  $J = 7.5$  Hz, C(H)CO<sub>2</sub>Et, 1H), 1.29 ppm (t,  $J = 7.2$  Hz, CH<sub>2</sub>CH<sub>3</sub>, 3H);  $^{19}\text{F}$  NMR (376 MHz, CDCl<sub>3</sub>):  $\delta = -105.67$  ppm (ddd,  $J_{\text{F-H}} = 15.2, 11.5$  Hz,  $^4J_{\text{F-H}} = 4.2$  Hz).

**Attempted preparation of ethyl (*E*)-3-((1*R*\*,3*S*\*)-2,2-difluoro-3-(thiophen-2-yl)cyclopropyl)acrylate (**24a/24b**)**

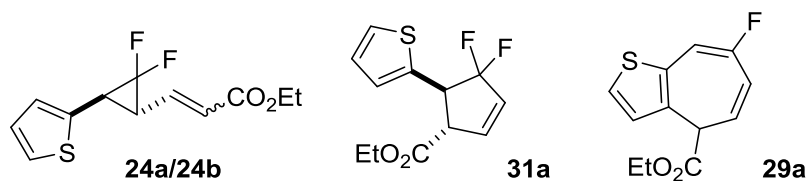

The synthesis of ester **24a** was attempted from alcohol **17c** (684 mg, 3.6 mmol), BAIB (1.26 g, 3.96 mmol), TEMPO (28 mg, 0.72 mmol), (ethoxycarbonylmethylene)-triphenylphosphorane (1.64 g, 4.68 mmol) and DCM (15 mL) according to general procedure D with an oxidation time of 3 h and an olefination time of 16 h. The  $^1\text{H}$  NMR spectrum of the crude reaction mixture confirmed complete consumption of **17c**. Column chromatography on silica gel (1:19 Et<sub>2</sub>O in hexane) afforded a set of fractions containing **24b** (12 mg), a mixture of rearrangement products and alkenoate **24a** (420 mg) and a mixture of rearrangement products **29a** and **31a** (212 mg). A solution of crude product containing **24a** in CDCl<sub>3</sub> (1 mL) and **24b** in CDCl<sub>3</sub> (1 mL) were heated at 40 °C and 50 °C, respectively for 17 h.  $^1\text{H}$  and  $^{19}\text{F}$  NMR showed complete consumption of VCP-precursors. Product samples containing a clean mixture of **29a** and **31a** were combined and concentrated under reduced pressure to afford a brown oil (488 mg). HPLC purification on a Kromasil C18 cartridge (2:5 to 1:1 gradient of MeCN containing 0.1% ammonia solution in 10 mM ammonium bicarbonate for 10 minutes then 1:1 to 9.9:10 of the same eluent for 30 minutes) afforded clean heptadiene **29a** (112 mg, 14%) as an orange oil and a brown oil containing a mixture of **29a** and difluorocyclopentene **31a** (24 mg, 1:1 by  $^1\text{H}$  NMR, the latter characterised by the distinctive  $^{19}\text{F}$  NMR signals). Data for **29a**:  $R_f$  = 0.42 (1:4 Et<sub>2</sub>O in hexane);  $^1\text{H}$  NMR (400 MHz, CDCl<sub>3</sub>):  $\delta$  = 7.38 (d,  $J$  = 5.2 Hz, ArH, 1H), 6.80 (dd,  $J_{\text{H-F}}$  = 15.6 Hz,  $^4J$  = 1.7 Hz, C-CH=CF, 1H), 6.77 (d,  $J$  = 5.24 Hz, ArH, 1H), 6.21 (dddd,  $J$  = 10.9 Hz,  $J_{\text{H-F}}$  = 7.3 Hz,  $^4J$  = 1.7, 0.8 Hz, CHCH=CH-CF, 1H), 6.01 (ddd,  $J$  = 10.9, 7.0 Hz,  $^4J_{\text{H-F}}$  = 4.6 Hz, CH-CH=CH, 1H), 4.29 (ABq,  $J$  = 7.2 Hz,  $^2J$  = 1.4 Hz, OCH<sub>a</sub>H<sub>b</sub>CH<sub>3</sub>, 2H), 3.98 (d,  $J$  = 7.0 Hz, C(H)CO<sub>2</sub>Et, 1H), 1.32 ppm (t,  $J$  = 7.2 Hz, CH<sub>2</sub>CH<sub>3</sub>, 3H);  $^{13}\text{C}$  NMR (100 MHz, CDCl<sub>3</sub>):  $\delta$  = 170.6, 158.8 (d,  $^1J_{\text{C-F}}$  = 246 Hz), 132.3 (d,  $J_{\text{C-F}}$  = 14.9 Hz), 129.7, 126.8 (d,  $^5J_{\text{C-F}}$  = 3.1 Hz), 125.8 (d,  $J_{\text{C-F}}$  = 13.0 Hz), 125.5, 120.5 (d,  $^2J_{\text{C-F}}$  = 35.2 Hz), 106.1 (d,  $^2J_{\text{C-F}}$  = 31.4 Hz), 60.9, 44.7, 13.7 ppm;  $^{19}\text{F}$  NMR (376 MHz, CDCl<sub>3</sub>):  $\delta$  = -103.4 ppm (ddd,  $J_{\text{F-H}}$  = 15.6, 7.3 Hz,  $^4J_{\text{F-H}}$  = 4.6 Hz);  $\bar{\nu}$ /(film) = 2980, 2937, 1733, 1632, 1444, 1402, 1370, 1333,

1308, 1186, 1137  $\text{cm}^{-1}$ ; MS (CI):  $m/z$  (%): 239 (41)  $[\text{M}+\text{H}]^+$ , 219 (35)  $[\text{M}-\text{F}]^+$ , 193 (25)  $[\text{M}-\text{OEt}]^+$ , 165 (100)  $[\text{M}-\text{CO}_2\text{Et}]^+$ , 147 (9); HRMS (APCI): calcd for  $\text{C}_{12}\text{H}_{12}\text{FSO}_2$ , 239.0542  $[\text{M}+\text{H}]^+$  found 239.0548;  $t_{\text{R}}$  (GC) = 12.91 minutes. Extracted data for **31a**:  $^1\text{H}$  NMR (400 MHz,  $\text{CDCl}_3$ ):  $\delta$  = 7.31 (dd,  $J$  = 5.1 Hz,  $^4J$  = 1.3 Hz, ArH, 1H), 7.09-7.07 (br m, containing d  $J$  = 3.7 Hz, ArH, 1H), 7.04 (dd,  $J$  = 5.1, 3.7 Hz, ArH, 1H), 6.46 (dt,  $J$  = 6.0, 1.9 Hz,  $^4J$  = 1.9 Hz,  $\text{CF}_2\text{-CH=CH}$ , 1H), 6.10 (dd,  $J$  = 6.0 Hz,  $^4J$  = 2.7 Hz,  $\text{CF}_2\text{-CH=CH}$ , 1H), 4.34-4.24 (m, under peak for **29a**, ArCH, 1H), 4.21 (q,  $J$  = 7.2 Hz,  $\text{OCH}_2\text{CH}_3$ , 2H), 3.94-3.88 (m,  $\text{CHCO}_2\text{Et}$ , 1H), 1.28 ppm (t,  $J$  = 7.2 Hz,  $\text{CH}_2\text{CH}_3$ , 3H);  $^{19}\text{F}$  NMR (376 MHz,  $\text{CDCl}_3$ ):  $\delta$  = -92.4 (ddd,  $^2J$  = 250.5 Hz,  $J_{\text{F-H}}$  = 14.8 Hz,  $^4J_{\text{F-H}}$  = 7.6 Hz,  $\text{CF}_a\text{F}_b$ , 1F), -93.7 ppm (ddd,  $^2J$  = 250.5 Hz,  $J_{\text{F-H}}$  = 14.6 Hz,  $^4J_{\text{F-H}}$  = 5.4 Hz,  $\text{CF}_a\text{F}_b$ , 1F); MS (CI):  $m/z$  (%): 267 (7)  $[\text{M}-\text{F}+\text{C}_2\text{H}_5]^+$ , 239 (100)  $[\text{M}-\text{F}]^+$ , 221 (8)  $[\text{M}-\text{F}_2+\text{H}]^+$ , 193 (25), 165 (12);  $t_{\text{R}}$  (GC) = 12.11 minutes.

**Attempted preparation of ethyl (*E*)-3-((1*R*\*,3*S*\*)-2,2-difluoro-3-(furan-2-yl)cyclopropyl)acrylate (**25a/25b**)**

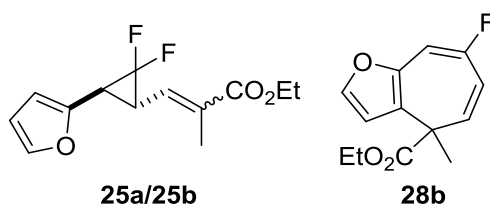

The synthesis of ester **25a** was attempted from alcohol **17a** (52 mg, 0.3 mmol), BAIB (106 mg, 0.33 mmol), TEMPO (5 mg, 0.03 mmol), (carbethoxyethylidene)triphenylphosphorane (142 mg, 0.39 mmol) and DCM (2 mL) according to general procedure D with an oxidation time of 3 h and an olefination time of 14 h. The  $^1\text{H}$  NMR spectrum of the crude reaction mixture confirmed complete consumption of **17a**, forming cycloheptadiene **28b** exclusively. The crude reaction mixture was transferred onto a pad of silica (10 g) in a sinter funnel which had been conditioned with hexane. The pad was eluted with 0:1 to 1:9  $\text{Et}_2\text{O}$  in hexane to afford cycloheptadiene **28b** as a pale yellow oil (34 mg, 48%).  $R_f$  = 0.41(1:4  $\text{Et}_2\text{O}$  in hexane);  $^1\text{H}$  NMR (400 MHz,  $\text{CDCl}_3$ ):  $\delta$  = 7.53 (d,  $J$  = 2.0 Hz, ArH, 1H), 6.57 (dddd,  $J_{\text{H-F}}$  = 14.9 Hz,  $^4J$  = 2.0, 0.7 Hz,  $^5J$  = 0.6 Hz, C-CH=CF, 1H), 6.28 (dd,  $J$  = 2.0 Hz,  $^4J$  = 0.7 Hz, ArH, 1H), 6.14 (ddd,  $J$  = 11.7 Hz,  $J_{\text{H-F}}$  = 10.3 Hz,  $^4J$  = 2.0 Hz, C(F)-CH=CH, 1H), 5.76 (dd,  $J$  = 11.7 Hz,  $^4J_{\text{H-F}}$  = 4.2 Hz, C(F)-CH=CH, 1H), 4.18 (q,  $J$  = 7.2 Hz,  $\text{OCH}_2\text{CH}_3$ , 2H), 1.64 (s,  $\text{CH}_3$ , 3H), 1.25 ppm (t,  $J$  = 7.2 Hz,  $\text{CH}_2\text{CH}_3$ , 3H);  $^{13}\text{C}$  NMR (150 MHz,  $\text{CDCl}_3$ ):  $\delta$  = 173.9, 157.8 (d,  $^1J_{\text{C-F}}$  = 241.0 Hz), 146.2 (d,

$^4J_{C-F} = 15.9$  Hz), 144.4 (d,  $^5J_{C-F} = 4.1$  Hz), 133.2 (d,  $J_{C-F} = 13.1$  Hz), 120.5 (d,  $^2J_{C-F} = 37.7$  Hz), 120.3 (d,  $J_{C-F} = 3.9$  Hz), 109.9, 102.5 (d,  $J_{C-F} = 33.7$  Hz), 61.4, 44.9, 24.0, 14.1 ppm;  $^{19}F$  NMR (376 MHz,  $CDCl_3$ ):  $\delta = -107.05$  (ddd,  $J_{F-H} = 14.9, 10.3$  Hz,  $^4J_{F-H} = 4.2$  Hz);  $\bar{\nu}$ /(film) = 2980, 2934, 1794, 1731, 1641, 1459, 1405, 1376, 1251, 1216, 1149, 1108, 1017  $cm^{-1}$ ; MS (CI):  $m/z$  (%): 237 (33)  $[M+H]^+$ , 217 (30)  $[M-F]^+$ , 191 (15)  $[M-OEt]^+$ , 189 (13)  $[M-(F+Et)+H]^+$ , 163 (100)  $[M-CO_2Et]^+$ , 145 (8)  $[M-(CO_2Et+F)+H]^+$ ; HRMS (APCI): calcd for  $C_{13}H_{17}F_1N_1O_3$ , 254.1187  $[M+NH_4]^+$  found 254.1189;  $t_R$  (GC) = 12.05 minutes.

### Attempted preparation of ethyl (*E*)-3-((1*R*\*,3*S*\*)-2,2-difluoro-3-(thiophen-2-yl)cyclopropyl)acrylate (**26a/26b**)

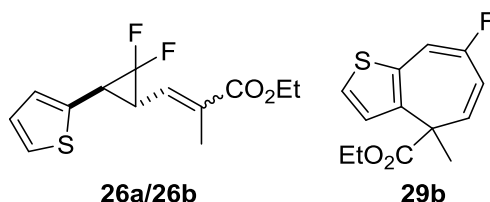

The synthesis of ester **26a** was attempted from alcohol **17c** (93 mg, 0.48 mmol), BAIB (171 mg, 0.53 mmol), TEMPO (7.5 mg, 0.05 mmol), (carbethoxyethylidene)triphenylphosphorane (226 mg, 0.62 mmol) and DCM (3.2 mL) according to general procedure D with an oxidation time of 3 h and an olefination time of 14 h. The  $^1H$  NMR spectrum of the crude reaction mixture confirmed complete consumption of **17c**, forming cycloheptadiene **29b** exclusively. The crude reaction mixture was transferred onto a pad of silica (10 g) in a sinter funnel which had been conditioned with hexane. The pad was eluted with 0:1 to 1:9  $Et_2O$  in hexane to afford cycloheptadiene **29b** as a pale yellow oil (66 mg, 55%).  $R_f = 0.39$  (1:4  $Et_2O$  in hexane);  $^1H$  NMR (400 MHz,  $CDCl_3$ ):  $\delta = 7.39$  (d,  $J = 5.4$  Hz, ArH, 1H), 6.88 (d,  $J = 5.4$  Hz, ArH, 1H), 6.76 (dd,  $J_{H-F} = 15.4$  Hz,  $^4J = 2.0$  Hz, C-CH=CF, 1H), 6.24 (ddd,  $J = 11.1$  Hz,  $J_{H-F} = 8.2$  Hz,  $^4J = 2.0$  Hz, CF-CH=CH, 1H), 5.80 (dd,  $J = 11.1$  Hz,  $^4J_{H-F} = 4.6$  Hz, CF-CH=CH, 1H), 4.14 (q,  $J = 7.2$  Hz,  $OCH_2CH_3$ , 2H), 1.79 (s, C- $CH_3$ , 3H), 1.20 ppm (t,  $J = 7.2$  Hz,  $CH_2CH_3$ , 3H);  $^{13}C$  NMR (100 MHz,  $CDCl_3$ ):  $\delta = 173.8, 158.2$  (d,  $^1J_{C-F} = 244.5$  Hz), 135.4 (d,  $^4J_{C-F} = 2.0$  Hz), 132.9 (d,  $J_{C-F} = 13.1$  Hz), 132.0 (d,  $J_{C-F} = 13.5$  Hz), 126.4 (d,  $^5J_{C-F} = 3.3$  Hz), 125.3, 120.0 (d,  $^2J_{C-F} = 36.0$  Hz), 105.9 (d,  $^2J_{C-F} = 31.3$  Hz), 60.8, 47.6, 23.3, 13.6 ppm;  $^{19}F$  NMR (376 MHz,  $CDCl_3$ ):  $\delta = -106.10$  (ddd,  $J_{F-H} = 15.4, 8.2$  Hz,  $^4J_{F-H} = 4.6$  Hz);  $\bar{\nu}$ /(film) = 2980, 2937, 1733, 1632, 1444, 1402, 1370, 1333, 1308, 1186, 1137  $cm^{-1}$ ; MS (CI):  $m/z$  (%): 253 (31)  $[M+H]^+$ , 233 (53)  $[M-F]^+$ , 207 (19)  $[M-OEt]^+$ , 179

(100)  $[M-CO_2Et]^+$ , 161 (8)  $[M-(CO_2Et+F)+H]^+$ ; HRMS (APCI): calcd for  $C_{13}H_{14}F_1S_1O_2$ , 253.0693  $[M+H]^+$  found 253.0696;  $t_R$  (GC) = 13.17 minutes.

**Attempted preparation of ethyl (*E*)-3-((1*R*\*,3*S*\*)-2,2-difluoro-3-(2'-furyl-3-methyl)cyclopropyl)acrylate (**S9a/S9b**)**

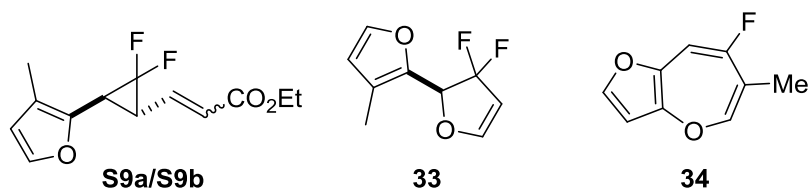

The synthesis of ester **S9a** was attempted from alcohol **17h** (71 mg, 0.38 mmol), BAIB (144 mg, 0.45 mmol), TEMPO (11 mg, 0.08 mmol), (carbethoxyethylidene)triphenylphosphorane (183 mg, 0.53 mmol) and DCM (3 mL) according to general procedure D with an oxidation time of 6 h and an olefination time of 16 h. Crude  $^1H$  and  $^{19}F$  NMR after oxidation suggested rearrangement had occurred before addition of phosphorane. The reaction mixture was concentrated under reduced pressure and crude  $^1H$  and  $^{19}F$  NMR showed no new formation of rearrangement products. Attempted chromatographic purification on silica gel (0:1 to 1:4 Et<sub>2</sub>O in hexane) failed to isolate desired rearrangement products either due to product volatility or decomposition on silica.  $^{19}F$  NMR of crude products showed strong similarities to 3,3-difluoro-4,5-dihydrofurans reported by Hammond and Arimitsu ( $^{19}F$  NMR:  $\delta$  = -84.6 (ddd,  $J$  = 248.0, 23.1, 19.8 Hz, 1F) -87.2 ppm (ddd,  $J$  = 248.0, 13.2, 13.2 Hz, 1F))<sup>S19</sup> and benzoheptadiene compounds reported previously by ourselves ( $^{19}F$  NMR:  $\delta$  = -100.7 ppm (dt,  $J_{F-H}$  = 18.2, 5.2 Hz,  $^4J_{F-H}$  = 5.2 Hz, 1F)).<sup>S20</sup> Due to these similarities the crude products were tentatively assigned as dihydrofuran **33** and ether **34** (1:2.5 ratio respectively by  $^{19}F$  NMR); the doublet of doublet observed for the latter suggest the methyl group underwent [1,5]-shift during the re-aromatisation of the furan (**Scheme S4**).

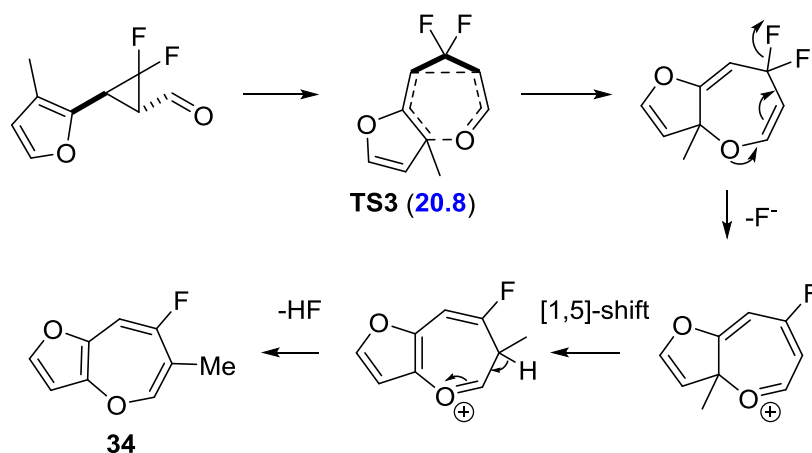

**Scheme S4:** Proposed mechanism rearrangement of **18h** to **34** through rearrangements ( $\Delta G^\ddagger$  value (blue) quoted in kcal mol<sup>-1</sup>)

Data for **33**: <sup>19</sup>F NMR (376 MHz, CDCl<sub>3</sub>):  $\delta$  = -81.9 (dd, <sup>2</sup>*J* = 248.0 Hz, *J*<sub>F-H</sub> = 20.0 Hz, 1F), -89.3 ppm (dt, <sup>2</sup>*J* = 248.0 Hz, *J*<sub>F-H</sub> = 13.8 Hz, 1F). Data for **34**: <sup>19</sup>F NMR (376 MHz, CDCl<sub>3</sub>):  $\delta$  = -99.4 ppm (dd, *J*<sub>F-H</sub> = 34.0 Hz, <sup>4</sup>*J*<sub>F-H</sub> = 18.5 Hz).

#### General Procedure E: Thermal Rearrangement of Vinyl Difluorocyclopropanes

##### Preparation of (1*R*\*,5*R*\*)-4,4-difluoro-*N*-methoxy-*N*-methyl-5-phenylcyclopent-2-ene-1-carboxamide (**35**)

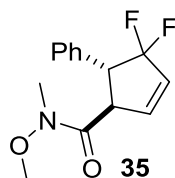

A solution of **19a** (7.0 mg, 0.026 mmol) in toluene (0.3 mL) was heated to 95 °C in a sealed microwave vial for 17 hours in a DrySyn block. After cooling and venting the vial, <sup>19</sup>F NMR confirmed complete consumption of **19a**. The reaction mixture was transferred to a round bottom flask using DCM (5 mL) and concentrated under reduced pressure to afford difluorocyclopentene **35** (6.8 mg, 97%) as a yellow oil. *R*<sub>f</sub> = 0.36 (1:1 Et<sub>2</sub>O in hexane); <sup>1</sup>H NMR (400 MHz, CDCl<sub>3</sub>):  $\delta$  = 7.40-7.31 (m, ArH, 5H), 6.40 (dt, *J* = 6.0, 1.6 Hz, *J*<sub>H-F</sub> = 1.6 Hz, =CHCHCO, 1H), 6.10 (dd, *J* = 6.0 Hz, <sup>4</sup>*J* = 2.5 Hz, CF<sub>2</sub>CH=CH, 1H), 4.34 (dddd, <sup>4</sup>*J*<sub>H-F</sub> = 8.9, 5.2 Hz, *J* = 6.7, 1.6 Hz, COCH, 1H), 4.11 (ddd, *J*<sub>H-F</sub> = 16.1, 15.4 Hz, *J* = 6.7 Hz, PhCH, 1H), 3.49 (s, OCH<sub>3</sub>, 3H), 3.20 ppm (s, OCH<sub>3</sub>, 3H); <sup>13</sup>C NMR (100 MHz, CDCl<sub>3</sub>):  $\delta$  = 170.5, 139.1 (t, *J*<sub>C-F</sub> = 10.0 Hz), 134.1, 129.6 (t, <sup>1</sup>*J*<sub>C-F</sub> = 254.7 Hz), 128.9, 128.3 (dd, <sup>2</sup>*J*<sub>C-F</sub> = 30.1, 25.2 Hz), 128.0, 127.3, 60.9, 53.2 (t,

$^2J_{C-F} = 24.5$  Hz), 51.4 (d,  $J_{C-F} = 5.3$  Hz), 31.9 ppm;  $^{19}F$  NMR (376 MHz,  $CDCl_3$ ):  $\delta = -90.2$  (ddd,  $^2J = 251.0$  Hz,  $J_{F-H} = 16.1$ ,  $^4J_{H-F} = 8.9$  Hz, 1F),  $-92.0$  ppm (ddd,  $^2J = 251.1$  Hz,  $J_{F-H} = 15.4$ ,  $^4J_{H-F} = 5.2$  Hz, 1F);  $\bar{\nu}/(\text{film}) = 2963, 2940, 2361, 2342, 1661, 1456, 1418, 1387, 1364, 1350, 1169, 1051, 1034, 1026, 1093$   $\text{cm}^{-1}$ ; MS (CI):  $m/z$  (%): 296 (19)  $[(M+H)-F]^+$ , 276 (26)  $[(M+H)-F]^+$ , 248 (100)  $[M-F]^+$ , 218 (10)  $[(M+H)-OMe-F]^+$ , 187 (16), 161 (6); HRMS (APCI): calcd for  $C_{14}H_{15}F_2NO_2Na$ , 290.0963  $[M+Na]^+$  found 290.0964;  $t_R$  (GC) = 12.97 minutes.

### Thermolysis of (Z)-3-((1R\*,3S\*)-2,2-difluoro-3-phenylcyclopropyl)-N-methoxy-N-methylacrylamide (19b)

A solution of **19b** (126 mg, 0.47 mmol) in  $Ph_2O$  (0.5 mL) was heated at 165 °C for 17 h according to General Procedure E. The crude reaction mixture was loaded onto a silica pad (10 g) conditioned with hexane.  $Ph_2O$  was eluted with hexane then crude products were eluted with  $Et_2O$ , collected and concentrated under reduced pressure to afford a brown oil (53 mg).  $^1H$  and  $^{19}F$  NMR confirmed full consumption of alkenoate **19b**. Column chromatography on silica gel (1:9 to 2:5  $EtOAc$  in hexane) was used to separated two major unknown products as yellow oils; unknown **S10a** (13 mg) and unknown **S10b** (7 mg). Lack of distinctive Weinreb amide signals in the  $^1H$  NMR suggests decomposition had occurred. Data for **S10a**:  $R_f = 0.21$  (1:1  $Et_2O$  in hexane);  $^{19}F$  NMR (376 MHz,  $CDCl_3$ ):  $\delta = -100.41$  (d,  $J_{F-H} = 15.9$  Hz). Data for **S10b**:  $R_f = 0.39$  (1:1  $Et_2O$  in hexane);  $^{19}F$  NMR (376 MHz,  $CDCl_3$ ):  $\delta = -87.39$  (s).

### Attempted preparation of ethyl (1R\*,5S\*)-4,4-difluoro-1-methyl-5-phenylcyclopent-2-ene-1-carboxylate (36)

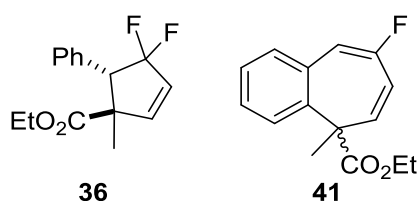

A solution of **20** (100 mg, 0.37 mmol) in  $Ph_2O$  (0.45 mL) was heated at 155 °C for 17 h according to General Procedure E. The crude reaction mixture was loaded onto a silica pad (16 g) conditioned with hexane.  $Ph_2O$  was eluted with hexane then crude products were eluted with  $Et_2O$ , collected and concentrated under reduced pressure to afford crude reaction mixture as a brown oil (100 mg).  $^1H$  and  $^{19}F$  NMR confirmed full consumption of alkenoate **20**. Column chromatography on silica gel (0:1 to 1:19  $EtOAc$  in hexane) was used



to separated two major unknown products as yellow oils; unknown **S11a** (8 mg) and unknown **S11b** (29 mg). Product assignment could not be determined due to complexity in  $^1\text{H}$  NMR spectra. However, the major  $^{19}\text{F}$  NMR signal for **S11b** was consistent with previously observed benzoheptadiene compounds and tentatively assigned as benzoheptadiene **41**. No evidence for VCPR rearrangement to difluorocyclopentene **36**.

Data for **S11a**:  $R_f = 0.18$  (1:19 EtOAc in hexane);  $^{19}\text{F}$  NMR ( $\text{CDCl}_3$ , 376 MHz):  $\delta = -103.67$  (minor peak, dd,  $J_{\text{F-H}} = 12.0, 7.5$  Hz),  $-110.58$  ppm (major peak, s). Data for **S11b**:  $R_f = 0.28$  (1:19 EtOAc in hexane);  $^{19}\text{F}$  NMR ( $\text{CDCl}_3$ , 376 MHz):  $\delta = -95.84$  (minor peak, dd,  $J_{\text{F-H}} = 32.9, 15.0$  Hz),  $-104.43$  ppm (major peak, dt,  $J_{\text{F-H}} = 17.8, 5.4$  Hz,  $^4J_{\text{F-H}} = 5.4$  Hz).

#### Preparation of (1*R*\*,5*R*\*)-4,4-difluoro-5-phenylcyclopent-2-ene-1-carbonitrile (**37**) and 4,4-difluoro-5-phenylcyclopent-1-ene-1-carbonitrile (**43**)

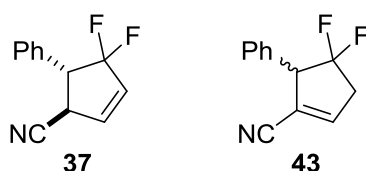

A solution of mixture **21a/21b** (100 mg, 0.48 mmol) in  $\text{Ph}_2\text{O}$  (1.0 mL) was heated to  $90^\circ\text{C}$  in a sealed microwave vial for 17 hours in a DrySyn block. After cooling and venting, the resulting  $^{19}\text{F}$  NMR spectrum confirmed full conversion of **21a**. The microwave vial was resealed and heated to  $160^\circ\text{C}$  for 17 hours in a DrySyn block. After cooling and venting, the resulting  $^{19}\text{F}$  NMR spectrum confirmed full consumption of **21b**. The crude reaction mixture was transferred onto a pad of silica (15 g) in a sinter funnel which has been conditioned with hexane.  $\text{Ph}_2\text{O}$  was eluted using hexane and then crude product fractions were eluted using  $\text{Et}_2\text{O}$ , collected and concentrated under reduced pressure to afford a red oil (106 mg). Column chromatography on silica gel (0:1 to 1:9  $\text{Et}_2\text{O}$  in hexane) afforded a mixture difluorocyclopentenenes **37** and **43** (6:1 ratio by  $^1\text{H}$  NMR) as a yellow oil (44.7 mg, 48%). Data for mixture of **37** and **43**:  $R_f = 0.21$  (1:9  $\text{Et}_2\text{O}$  in hexane);  $\bar{\nu}/(\text{film}) = 3091, 3069, 3036, 2915, 2249, 2229, 1502, 1457, 1349, 1178$   $\text{cm}^{-1}$ ; HRMS (APCI): calcd for  $\text{C}_{12}\text{H}_8\text{F}_2\text{N}$ , 204.0625 [M-H] found 204.0634; Data for **37**:  $^1\text{H}$  NMR (400 MHz,  $\text{CDCl}_3$ ):  $\delta = 7.47\text{-}7.40$  (m, ArH, 3H),  $7.35\text{-}7.32$  (m, ArH, 2H),  $6.45$  (dt,  $J = 6.0, 1.9$  Hz,  $^4J_{\text{H-F}} = 1.3$  Hz,  $\text{C}(\text{F}_2)\text{CH}=\text{CH}$ , 1H)  $6.26$  (dd,  $J = 6.0$  Hz,  $J_{\text{H-F}} = 2.6$  Hz,  $\text{C}(\text{F}_2)\text{-CH}=\text{CH}$ , 1H),  $3.99$  (dddd,  $J = 7.6, 2.0$  Hz,  $^4J_{\text{H-F}} = 9.6, 5.0$  Hz,  $\text{C}(\text{H})\text{CN}$ , 1H),

3.90 ppm (ddd,  $J = 7.6$  Hz,  $J_{\text{H-F}} = 14.6, 13.7$  Hz, ArCH, 1H);  $^{13}\text{C}$  NMR (100 MHz,  $\text{CDCl}_3$ ):  $\delta = 134.8$  (t,  $J_{\text{C-F}} = 10.0$  Hz), 131.0, 130.4 (dd,  $^2J_{\text{C-F}} = 30.1, 24.1$  Hz), 128.5, 128.4 (represents 2 carbon atoms), 127.4 (t,  $^1J_{\text{C-F}} = 246.7$  Hz), 117.3 (d,  $^4J_{\text{C-F}} = 5.2$  Hz), 5.4 (t,  $^2J_{\text{C-F}} = 25.4$  Hz), 38.3 ppm (d,  $J_{\text{C-F}} = 6.4$  Hz);  $^{19}\text{F}$  NMR (376 MHz,  $\text{CDCl}_3$ ):  $\delta = -90.98$  (ddd,  $^2J = 255.6$  Hz,  $J_{\text{F-H}} = 14.9$  Hz,  $^4J_{\text{F-H}} = 9.6$  Hz,  $\text{CF}_a\text{F}_b$ , 1F),  $-93.00$  ppm (ddd,  $^2J = 255.6$  Hz,  $J_{\text{F-H}} = 13.7$  Hz,  $^4J_{\text{F-H}} = 14.6$  Hz,  $\text{CF}_a\text{F}_b$ , 1F); MS (CI):  $m/z$  (%): 246 (10)  $[\text{M}+\text{C}_3\text{H}_5]^+$ , 234 (20)  $[\text{M}+\text{C}_2\text{H}_5]^+$ , 206 (77)  $[\text{M}+\text{H}]^+$ , 186 (100)  $[\text{M}-\text{F}]^+$ ;  $t_{\text{R}}$  (GC) = 11.31 minutes. Data for **47**:  $^1\text{H}$  NMR (400 MHz,  $\text{CDCl}_3$ ):  $\delta = 7.47$ -7.40 (m, ArH, 3H), 7.24-7.22 (m, ArH, 2H), 6.87 (dtt,  $J = 5.0$  Hz,  $^4J_{\text{H-F}} = 2.6$  Hz,  $^4J = 2.2$  Hz,  $\text{CF}_2\text{-CH}_2\text{-CH=}$ , 1H), 4.36 (dddt,  $J_{\text{H-F}} = 18.0, 7.9$  Hz,  $^4J = 2.2, 1.4$  Hz, ArCH, 1H), 3.17-3.09 (m,  $\text{CF}_2\text{-CH}_2\text{-CH=}$ , 2H);  $^{13}\text{C}$  NMR (100 MHz,  $\text{CDCl}_3$ ):  $\delta = 143.9$  (t,  $J_{\text{C-F}} = 4.1$  Hz), 129.9, 128.3, 128.2 (represents 2 carbon atoms), 127.1 (t,  $^1J_{\text{C-F}} = 255.1$  Hz), 115.9 (dd,  $J_{\text{C-F}} = 6.7, 2.8$  Hz), 114.1, 58.7 (dd,  $^2J_{\text{C-F}} = 26.7, 25.4$  Hz), 41.9 ppm (dd,  $J_{\text{C-F}} = 28.9, 28.3$  Hz);  $^{19}\text{F}$  NMR (376 MHz,  $\text{CDCl}_3$ ):  $\delta = (-90.62)$ - $(-91.40)$  (m,  $\text{CF}_a\text{F}_b$ , underneath  $^{19}\text{F}$  signal for major product **37**),  $(-98.05)$ - $(-98.76)$  ppm (m, containing d,  $^2J = 233.1$  Hz,  $\text{CF}_a\text{F}_b$ ); MS (CI):  $m/z$  (%): 246 (7)  $[\text{M}+\text{C}_3\text{H}_5]^+$ , 234 (17)  $[\text{M}+\text{C}_2\text{H}_5]^+$ , 206 (100)  $[\text{M}+\text{H}]^+$ , 186 (35)  $[\text{M}-\text{F}]^+$ ;  $t_{\text{R}}$  (GC) = 11.50 minutes.

**Preparation of ethyl (1R,5R)-5-(benzo[d][1,3]dioxol-5-yl)-4,4-difluorocyclopent-2-ene-1-carboxylate (39) and ethyl 8-fluoro-5H-cyclohepta[4,5]benzo[1,2-d][1,3]dioxole-5-carboxylate (44)**

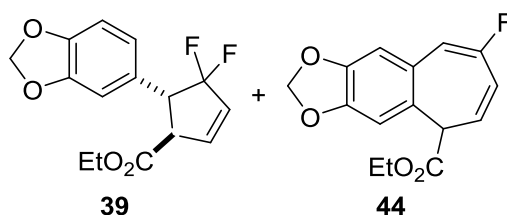

A solution of **22a** (445 mg, 0.07 mmol) in a toluene (7.5 mL) was heated to 70 °C for 17 h according the General Procedure E.  $^1\text{H}$  and  $^{19}\text{F}$  NMR showed full consumption of **22a** to a mixture of difluorocyclopentene **39** and benzoheptadiene **44** (42:58 respectively, relative ratio by  $^{19}\text{F}$  NMR). HPLC purification on a Kromasil C18 cartridge (3:10 to 9.9:10 gradient of MeCN containing 0.1% ammonia solution in 10 mM ammonium bicarbonate) afford clean fluoroheptadiene **44** (45 mg, 11%) as a white solid and difluorocyclopentene **39** (82 mg, 18%). Note: poor yield could be due to partial solubility of crude reaction mixture in loading solvent for HPLC purification (1:1 DMSO/MeOH). Data for **39**:  $R_f = 0.35$  (1:4  $\text{Et}_2\text{O}$  in hexane);

$^1\text{H}$  NMR (400 MHz,  $\text{CDCl}_3$ ):  $\delta$  = 6.81 (s, ArH, 3H), 6.48 (ddd,  $J$  = 6.0 Hz,  $J_{\text{H-F}}$  = 1.7 Hz,  $^4J$  = 1.7 Hz,  $\text{CF}_2\text{-CH=CH}$ , 1H), 6.07 (dd,  $J$  = 6.0, 2.5 Hz,  $\text{CH=CH}$ , 1H), 5.98 (s,  $\text{O}_2\text{CH}_2$ , 2H), 4.19 (q,  $J$  = 7.0 Hz,  $\text{OCH}_2\text{CH}_3$ , 2H), 3.95-3.82 (m, ArCH and  $\text{HCCO}_2\text{Et}$ , 2H), 1.26 ppm (t,  $J$  = 7.0 Hz,  $\text{CH}_2\text{CH}_3$ , 3H);  $^{13}\text{C}$  NMR (100 MHz,  $\text{CDCl}_3$ ):  $\delta$  = 170.2 (d,  $^4J_{\text{C-F}}$  = 2.7 Hz), 147.3, 146.8, 138.4 (t,  $J_{\text{C-F}}$  = 10.4 Hz), 129.0 (t,  $^1J_{\text{C-F}}$  = 245.7 Hz), 128.4 (dd,  $^2J_{\text{C-F}}$  = 30.8, 24.5 Hz), 127.2, 122.3, 108.8, 107.7, 100.6, 61.0, 54.2 (d,  $J_{\text{C-F}}$  = 5.8 Hz), 53.1 (t,  $^2J_{\text{C-F}}$  = 24.0 Hz), 13.6 ppm;  $^{19}\text{F}$  NMR (376 MHz,  $\text{CDCl}_3$ ):  $\delta$  = -90.21 (ddd,  $^2J$  = 252.5 Hz,  $J_{\text{F-H}}$  = 16.4,  $^4J_{\text{F-H}}$  = 8.6 Hz,  $\text{CF}_a\text{F}_b$ , 1F), -93.07 ppm (ddd,  $^2J$  = 252.5 Hz,  $J_{\text{F-H}}$  = 14.1,  $^4J_{\text{F-H}}$  = 5.1 Hz,  $\text{CF}_a\text{F}_b$ , 1F);  $\bar{\nu}$ /(film) = 2982, 2904, 1614, 1731, 1506, 1493, 1446, 1245, 1167, 1018  $\text{cm}^{-1}$ ; MS (CI):  $m/z$  (%): 277 (100)  $[\text{M-F}]^+$ , 231 (16), 203 (15), 175 (4)  $[\text{M-C}_7\text{O}_2\text{H}_5]^+$ ; HRMS (APCI): calcd for  $\text{C}_{15}\text{H}_{14}\text{FO}_4$ , 277.0876  $[\text{M-F}]$  found 277.0905;  $t_{\text{R}}$  (GC) = 14.09 minutes. Data for **44**: m.p. = 118-120 °C (chloroform/pentane);  $R_f$  = 0.40 (1:4  $\text{Et}_2\text{O}$  in hexane);  $^1\text{H}$  NMR (400 MHz,  $\text{CDCl}_3$ ):  $\delta$  = 6.82 (s, ArH, 1H), 6.80 (d,  $J_{\text{H-F}}$  = 18.1 Hz,  $\text{C-CH=CF}$ , 1H), 6.59 (s, ArH, 1H), 6.22-6.14 (m, representing  $\text{CF-CH=CH}$  and  $\text{C(H)-CH=CH}$ , 2H), 6.01 (d,  $^2J$  = 1.4 Hz,  $\text{OCH}_a\text{H}_b\text{O}$ , 1H), 5.98 (d,  $^2J$  = 1.4 Hz,  $\text{OCH}_a\text{H}_b\text{O}$ , 1H), 4.30 (ABq,  $J$  = 7.2 Hz,  $^2J$  = 1.9 Hz,  $\text{OCH}_a\text{H}_b\text{CH}_3$ , 2H), 3.69 (d,  $J$  = 5.2 Hz,  $\text{HCCO}_2\text{Et}$ , 1H), 1.31 ppm (t,  $J$  = 7.2 Hz,  $\text{CH}_2\text{CH}_3$ , 3H);  $^{13}\text{C}$  NMR (100 MHz,  $\text{CDCl}_3$ ):  $\delta$  = 171.0, 158.6 (d,  $^2J_{\text{C-F}}$  = 245.5 Hz), 148.6, 146.1, 127.7 (d,  $J_{\text{C-F}}$  = 12.5 Hz), 126.0 (d,  $J_{\text{C-F}}$  = 11.4 Hz), 125.8, 119.3 (d,  $^2J_{\text{C-F}}$  = 35.1 Hz), 113.0 (d,  $^2J_{\text{C-F}}$  = 27.9 Hz), 107.0 (d,  $^5J_{\text{C-F}}$  = 3.8 Hz), 105.1, 101.1, 60.9, 48.9, 13.7 ppm;  $^{19}\text{F}$  NMR (376 MHz,  $\text{CDCl}_3$ ):  $\delta$  = -102.97 ppm (ddd,  $J_{\text{F-H}}$  = 18.1, 4.8 Hz,  $^4J_{\text{C-F}}$  = 4.8 Hz);  $\bar{\nu}$ /(film) = 2982, 2904, 1733, 1645, 1506, 1485, 1374, 1333, 1305, 1238, 1193  $\text{cm}^{-1}$ ; MS (CI):  $m/z$  (%): 305 (11)  $[\text{M}+\text{C}_2\text{H}_5]^+$ , 277 (65)  $[\text{M}+\text{H}]^+$ , 257 (41)  $[\text{M}+\text{H}]^+$ , 231 (100)  $[\text{M-OEt}]^+$ , 203 (40)  $[\text{M-CO}_2\text{Et}]^+$ , 57 (80); HRMS (ASAP+): calcd for  $\text{C}_{15}\text{H}_{14}\text{FO}_4$ , 277.0876  $[\text{M}+\text{H}]^+$  found 277.0884;  $t_{\text{R}}$  (GC) = 14.97 minutes.

### Preparation of ((1S\*,2S\*)-2-phenylcyclopropyl)methanol (**S12**)

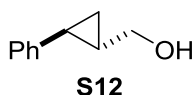

Diiodomethane (1 ml, 12.5 mmol) was added dropwise to a solution of diethylzinc (6.25 mL of a 1 M solution in hexane, 6.25 mmol) in DCM (2 mL) at 0 °C over a period of 5 minutes and stirred for 20 minutes under nitrogen. A solution of cinnamyl alcohol (335 mg, 1.25 mmol) in DCM (1.5 mL) was added dropwise and the reaction mixture and stirred for 2.5 hours at 0 °C. The reaction mixture was quenched with saturated aqueous  $\text{NH}_4\text{Cl}$  (10 ml) and

EtOAc (10 ml). The organic layer was separated and the aqueous layer extracted further with EtOAc (3 x 10 ml). The original organic layer and extracts were combined, dried (MgSO<sub>4</sub>) and concentrated under reduced pressure to remove volatile organic solvent. Column chromatography on silica gel (2:3 EtOAc in hexane) afforded alcohol **S12** as a yellow oil (93 mg, 52%). *R*<sub>f</sub> = 0.23 (1:1 Et<sub>2</sub>O in hexane); <sup>1</sup>H NMR (400 MHz, CDCl<sub>3</sub>): δ = 7.29-7.26 (m, ArH, 2H), 7.17 (tt, *J* = 7.3 Hz, <sup>4</sup>*J* = 1.2 Hz, ArH, 1H), 7.10-7.08 (m, ArH, 2H), 3.64 (dd, <sup>2</sup>*J* = 11.3 Hz, *J* = 6.8 Hz, CH<sub>a</sub>H<sub>b</sub>OH, 1H), 3.62 (dd, <sup>2</sup>*J* = 11.3 Hz, *J* = 6.8 Hz, CH<sub>a</sub>H<sub>b</sub>OH, 1H), 1.84 (td, *J* = 9.8, 4.9 Hz, PhCH, 1H), 1.78 (br. s, OH, 1H), 1.50-1.44 (m, CH<sub>2</sub>CH(CH<sub>2</sub>)CH, 1H), 1.00-0.92 ppm (m, CH<sub>2</sub>, 2H); <sup>13</sup>C NMR (100 MHz, CDCl<sub>3</sub>): δ = 142.5, 128.4, 125.9, 125.7, 66.5, 25.3, 21.3, 13.8 ppm;  $\bar{\nu}$ /(film) = 3333, 3026, 3003, 2361, 2342, 1605, 1497, 1018, 743, 696 cm<sup>-1</sup>; MS (CI): *m/z* (%): 159 (14) [(M+H)-OH]<sup>+</sup>, 131 (100) [M-OH]<sup>+</sup>; 117 (29), 91 (28); t<sub>R</sub> (GC) = 11.10 minutes. Data was in agreement with those reported by Charette and co-workers.<sup>S21</sup>

#### Preparation of ethyl (*E*)-3-((1*R*\*,2*S*\*)-2-phenylcyclopropyl)acrylate (**47**)

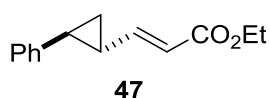

Ester **47** was prepared from alcohol **S12** (100 mg, 0.67 mmol), TEMPO (10 mg, 0.067 mmol), BAIB (237 mg, 0.74 mmol), (carbethoxyethylidene)triphenylphosphorane (303 mg, 0.87 mmol) and anhydrous DCM (1 mL) according to general procedure D with an oxidation time of 3.5 hours and an olefination time of 20 hours. Column chromatography on silica gel (1:9 Et<sub>2</sub>O in hexane) afforded ester **47** as a colourless oil (100 mg, 67%). *R*<sub>f</sub> = 0.42 (1:4 Et<sub>2</sub>O in hexane); <sup>1</sup>H NMR (400 MHz, CDCl<sub>3</sub>): δ = 7.33-7.28 (m, ArH, 2H), 7.21 (tt, *J* = 7.3 Hz, <sup>4</sup>*J* = 1.3 Hz, ArH, 1H), 7.12-7.09 (m, ArH, 2H), 6.62 (dd, *J* = 15.5, 9.9 Hz, CHCH=CH, 1H), 5.92 (d, *J* = 15.5 Hz, CH=CH, 1H), 4.21 (q, *J* = 7.2 Hz, OCH<sub>2</sub>CH<sub>3</sub>, 2H), 2.20 (ddd, *J* = 9.5, 6.2, 4.3 Hz, PhCH, 1H), 1.84 (dddd, *J* = 9.9, 8.4, 5.4, 4.1 Hz, CH<sub>2</sub>CHCH=CH, 1H), 1.47 (ddd, <sup>2</sup>*J* = 8.5, *J* = 6.6, 5.2 Hz, CHCH<sub>a</sub>H<sub>b</sub>CH, 1H), 1.36-1.30 ppm (m, (incl. 1.31 ppm, t, *J* = 7.2 Hz, OCH<sub>2</sub>CH<sub>3</sub>, 3H), 4H); <sup>13</sup>C NMR (100 MHz, CDCl<sub>3</sub>): δ = 166.2, 151.0, 140.3, 128.0, 125.7, 125.4, 118.4, 59.6, 26.4, 26.2, 17.2, 13.8 ppm;  $\bar{\nu}$ /(film) = 2980, 2359, 2342, 1709, 1643, 1256, 1175, 1036 cm<sup>-1</sup>; MS (CI): *m/z* (%): 245 (6) [M+C<sub>2</sub>H<sub>5</sub>]<sup>+</sup>, 217 (56) [M+H]<sup>+</sup>, 171 (50) [M-OEt]<sup>+</sup>, 143 (100) [M-CO<sub>2</sub>Et]<sup>+</sup>, HRMS (APCI): calcd for C<sub>14</sub>H<sub>17</sub>O<sub>2</sub>, 217.1223 [M+H]<sup>+</sup> found 217.1224; t<sub>R</sub> (GC) = 13.57 minutes.

**Preparation of ethyl (1R\*,5R\*)-5-phenylcyclopent-2-ene-1-carboxylate (38a) and ethyl (1R\*,5S\*)-5-phenylcyclopent-2-ene-1-carboxylate (38b)**

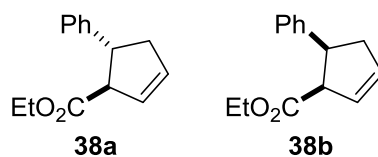

A solution of **47a** (100 mg, 0.46 mmol) in a Ph<sub>2</sub>O (0.5 mL) was heated to 220 °C for 17 h according to the General Procedure E. The crude reaction mixture was transferred onto a pad of silica (10 g) in a sinter funnel which has been conditioned with hexane. Ph<sub>2</sub>O was eluted using hexane and then crude product fractions were eluted using Et<sub>2</sub>O, collected and concentrated under reduced pressure to afford an orange oil (80 mg). Column chromatography on silica gel (0:1 to 1:9 Et<sub>2</sub>O in hexane) afforded a *trans*-**38a** (40 mg, 40%) and *cis*-**38b** (22 mg, 22%, compound started to decompose slowly after isolation to an unknown side product) as pale yellow oils. Data for *trans*-**38a**: R<sub>f</sub> = 0.65 (1:4 Et<sub>2</sub>O in hexane); <sup>1</sup>H NMR (400 MHz, CDCl<sub>3</sub>): δ = 7.35-7.27 (m, ArH, 3H), 7.25-7.21 (m, ArH, 2H), 5.96 (ddt, J = 5.7, 2.5 Hz, <sup>4</sup>J = 2.3 Hz, CH<sub>2</sub>CH=CH, 1H), 5.79 (ddt, J = 5.7, 2.4 Hz, <sup>4</sup>J = 2.2 Hz, CH<sub>2</sub>CH=CH, 1H), 4.17 (q, J = 7.2 Hz, OCH<sub>2</sub>CH<sub>3</sub>, 2H), 3.83 (dt, J = 9.2, 6.6 Hz, ArCH, 1H), 3.67 (dddd, J = 9.2, 2.5 Hz, <sup>4</sup>J = 2.5, 2.2 Hz, HCCO<sub>2</sub>Et, 1H), 3.00 (dddd, <sup>2</sup>J = 16.9 Hz, J = 9.2, 2.4 Hz, <sup>4</sup>J = 2.6, 2.3 Hz, -CH<sub>α</sub>H<sub>β</sub>-, 1H), 2.56 (dddd, <sup>2</sup>J = 16.9 Hz, J = 6.6, 2.4 Hz, <sup>4</sup>J = 2.6, 2.3 Hz, -CH<sub>α</sub>H<sub>β</sub>-, 1H), 1.27 ppm (t, J = 7.2 Hz, 3H); <sup>13</sup>C NMR (100 MHz, CDCl<sub>3</sub>): δ = 173.6, 145.0, 132.2, 128.1, 127.7, 126.6, 125.9, 60.2, 59.0, 45.8, 41.1, 13.7 ppm;  $\bar{\nu}$ /(film) = 3060, 3029, 2980, 2932, 2906, 2854, 1731, 1495, 1457, 1245, 1176 cm<sup>-1</sup>; MS (CI): m/z (%): 245 (2) [M+C<sub>2</sub>H<sub>5</sub>]<sup>+</sup>, 217 (8) [M+H]<sup>+</sup>, 171 (19) [M-OEt]<sup>+</sup>, 143 (100) [M-CO<sub>2</sub>Et]<sup>+</sup>, HRMS (APCI): calcd for C<sub>14</sub>H<sub>17</sub>O<sub>2</sub>, 217.1228 [M+H]<sup>+</sup> found 217.1229; t<sub>R</sub> (GC) = 12.44 minutes. Data *cis*-**38b**: R<sub>f</sub> = 0.52 (1:4 Et<sub>2</sub>O in hexane); <sup>1</sup>H NMR (400 MHz, CDCl<sub>3</sub>): δ = 7.27-7.28 (m, ArH, 4H), 7.22-7.17 (m, ArH, 1H), 6.15 (ddt, J = 5.7, 2.2 Hz, <sup>4</sup>J = 2.1 Hz, CH<sub>2</sub>CH=CH, 1H), 5.85 (ddt, J = 5.7, 2.3 Hz, <sup>4</sup>J = 1.9 Hz, CH<sub>2</sub>CH=CH, 1H), 3.93 (dddt, J = 9.1, 2.1 Hz, <sup>4</sup>J = 2.0, 1.9 Hz, HCCO<sub>2</sub>Et, 1H), 3.85 (dt, J = 9.1, 7.2 Hz, ArCH, 1H), 3.78-3.61 (m, OCH<sub>α</sub>H<sub>β</sub>CH<sub>3</sub>, 2H); 2.83 (dddd, J = 7.2, 2.3 Hz, <sup>4</sup>J = 2.2, 1.9 Hz, CH-CH<sub>2</sub>-CH=CH-, 2H), 0.85 ppm (t, J = 7.0 Hz, CH<sub>2</sub>CH<sub>3</sub>, 3H); <sup>13</sup>C NMR (100 MHz, CDCl<sub>3</sub>): δ = 172.2, 141.5, 133.8, 128.0, 127.5, 127.4, 126.0, 59.6, 55.9, 46.3, 38.4, 13.2 ppm;  $\bar{\nu}$ /(film) = 3060, 3029, 2980, 2932, 2904, 1729, 1495, 1457, 1370, 1178 cm<sup>-1</sup>; MS (CI): m/z (%): 245 (5) [M+C<sub>2</sub>H<sub>5</sub>]<sup>+</sup>, 217 (14) [M+H]<sup>+</sup>, 171 (20) [M-OEt]<sup>+</sup>, 143 (100) [M-CO<sub>2</sub>Et]<sup>+</sup>; HRMS (TOF): calcd for C<sub>14</sub>H<sub>17</sub>O<sub>2</sub>, 216.1150 [M] found 216.1155; t<sub>R</sub> (GC) = 12.28 minutes.

# Characterisation Spectra

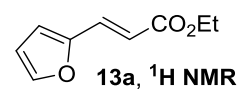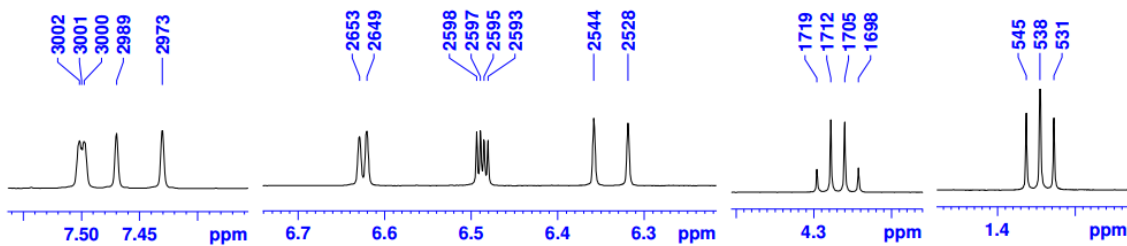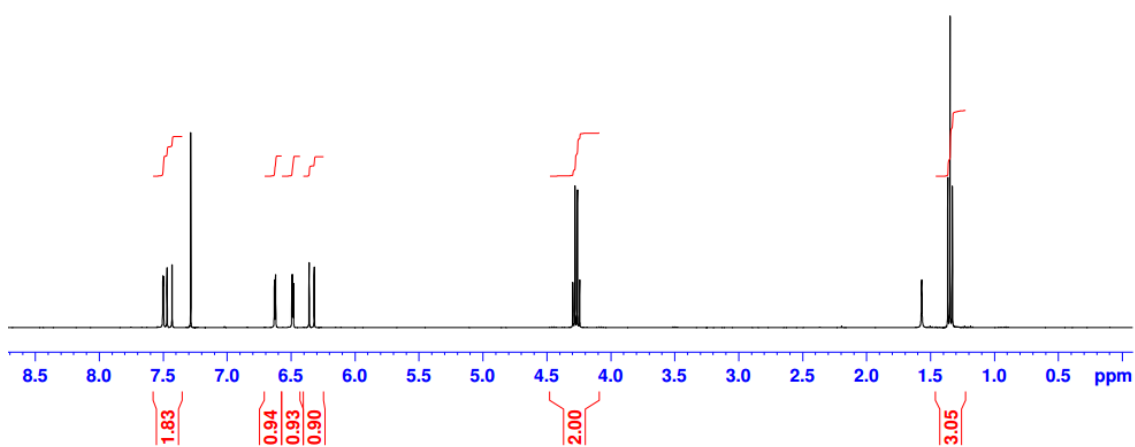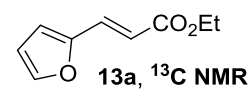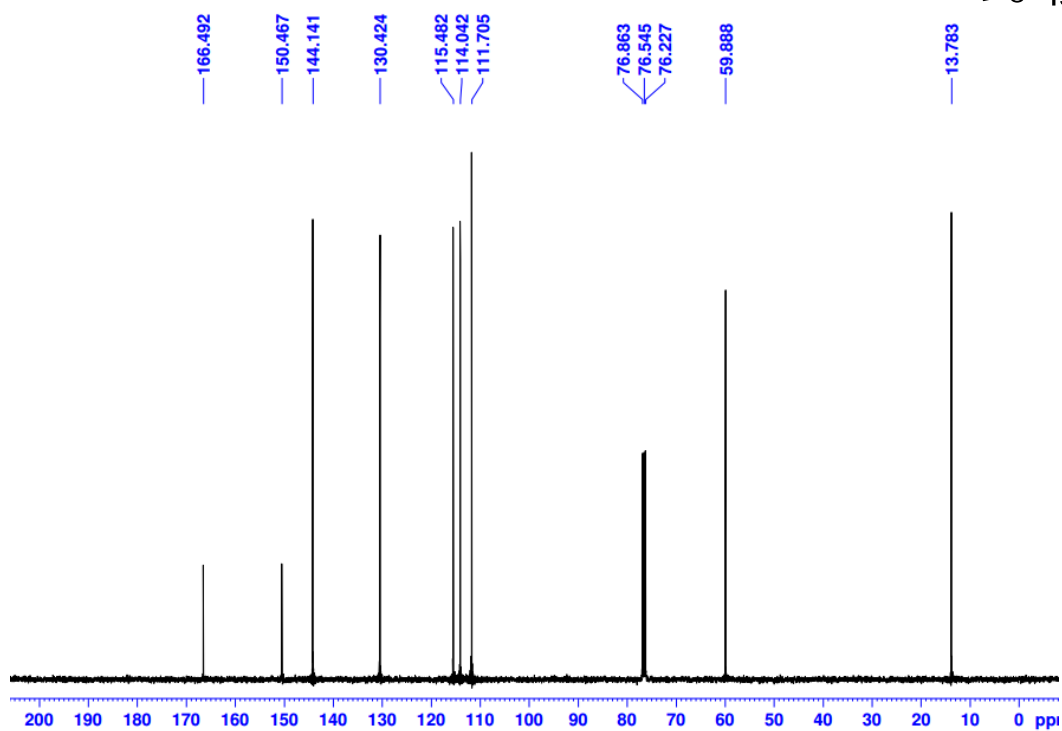

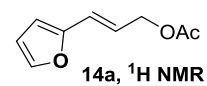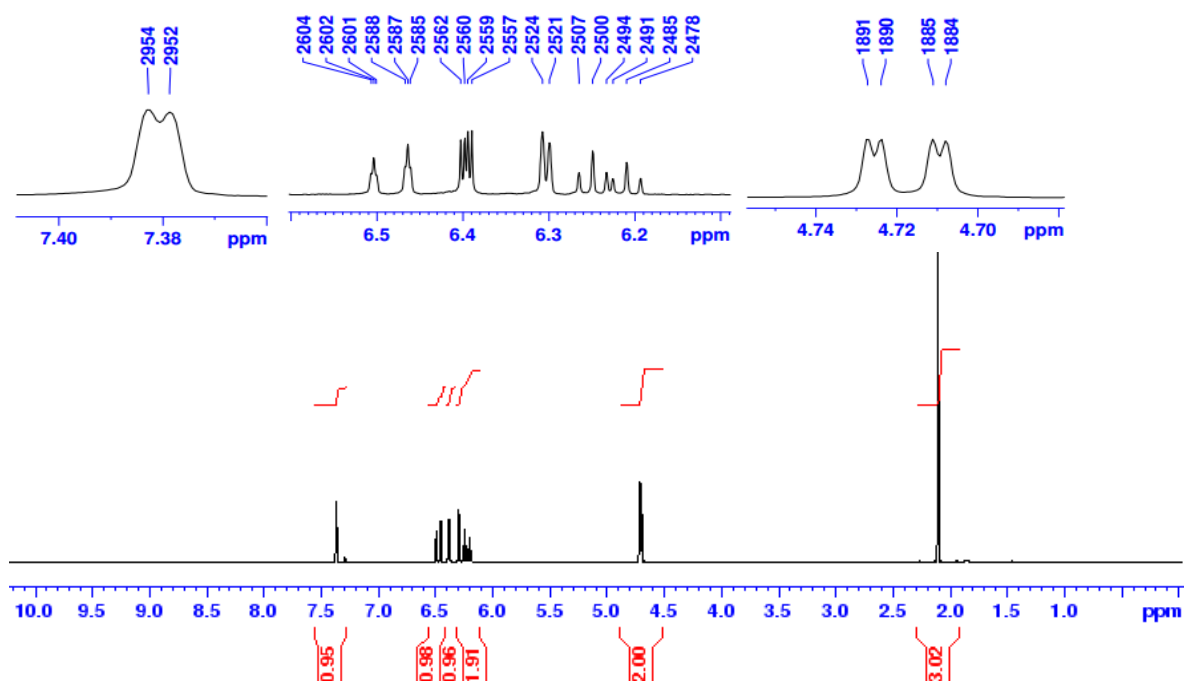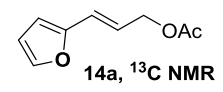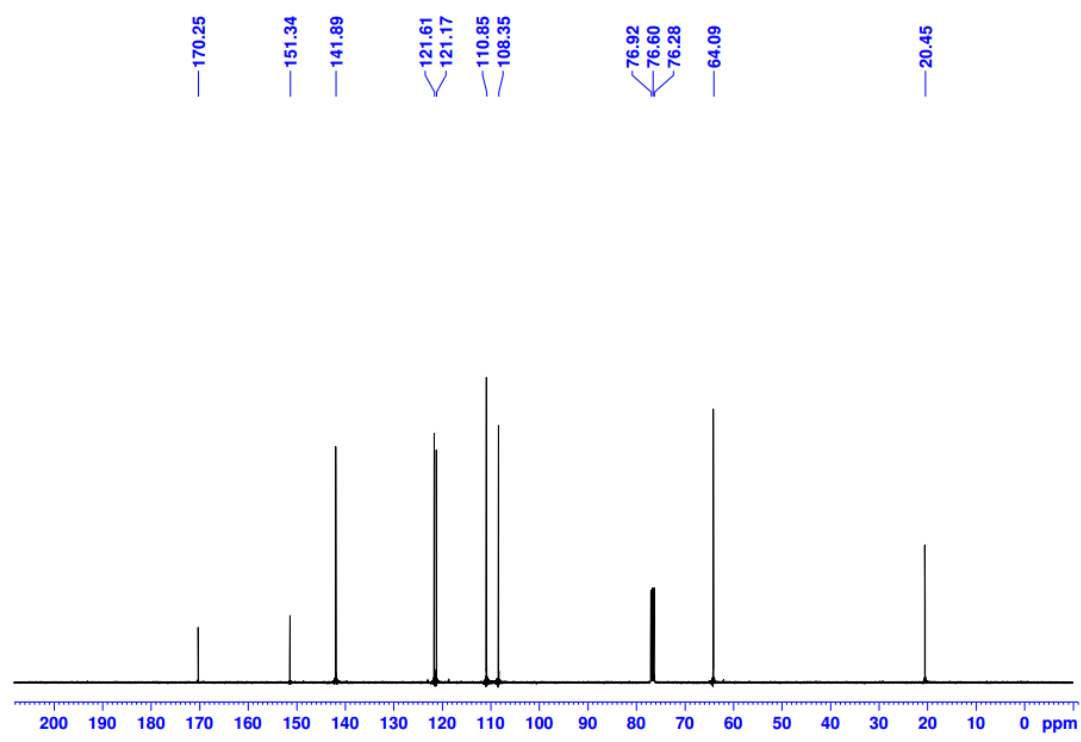

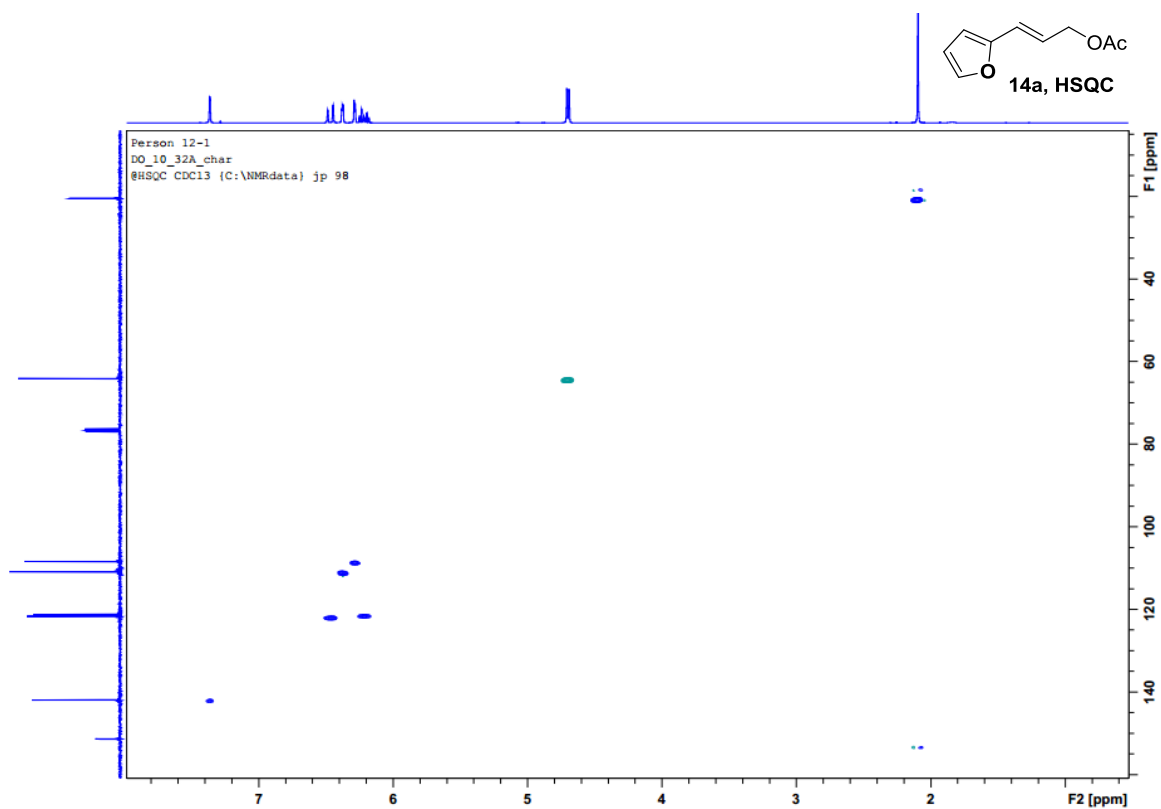

"222 Ethyl Cinnamate" 1 1 "C:\Users\David\Dropbox\1H NMR\DO\_PhD\_9\NMR"

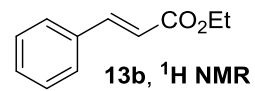

Commercial

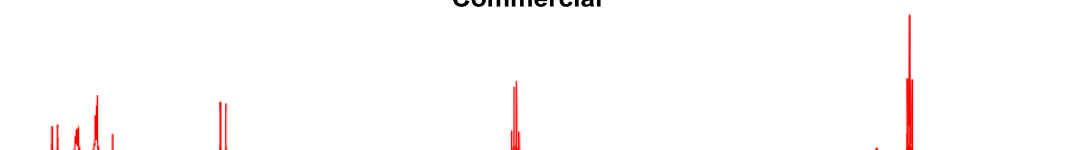

"D203248 9\_7\_HVAC" 1 1 "C:\Users\David\Dropbox\1H NMR\DO\_PhD\_9\NMR"

Synthesised

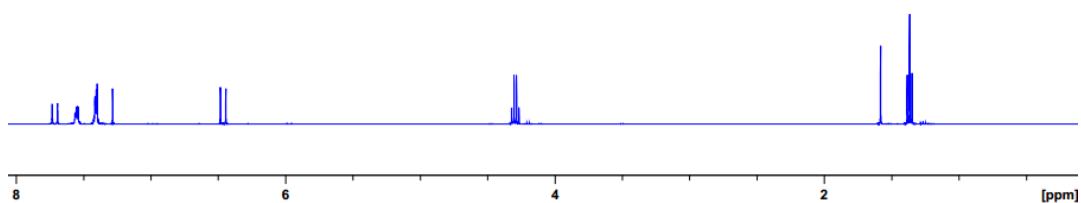



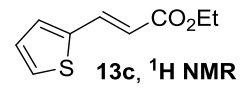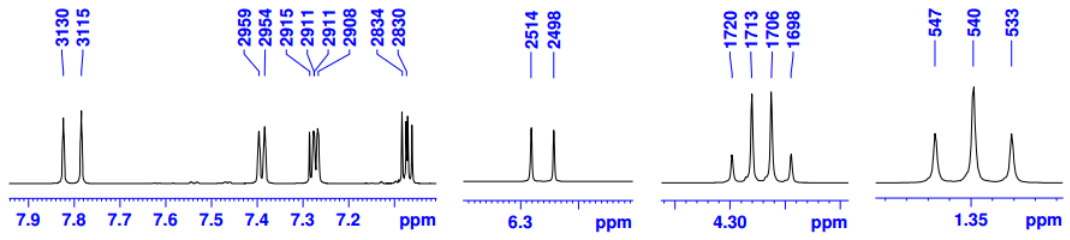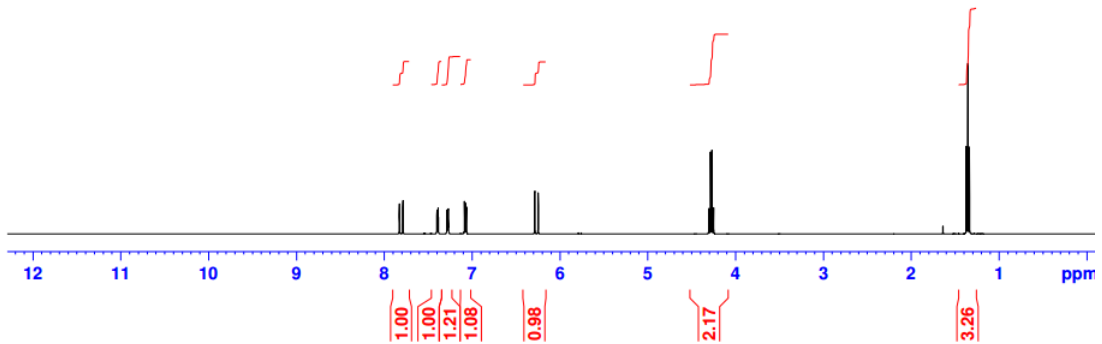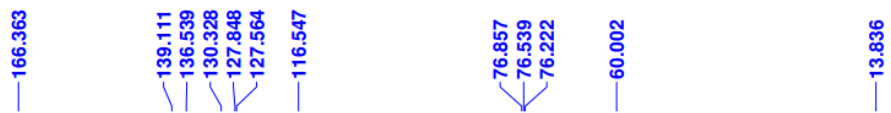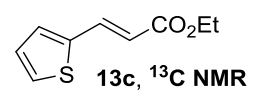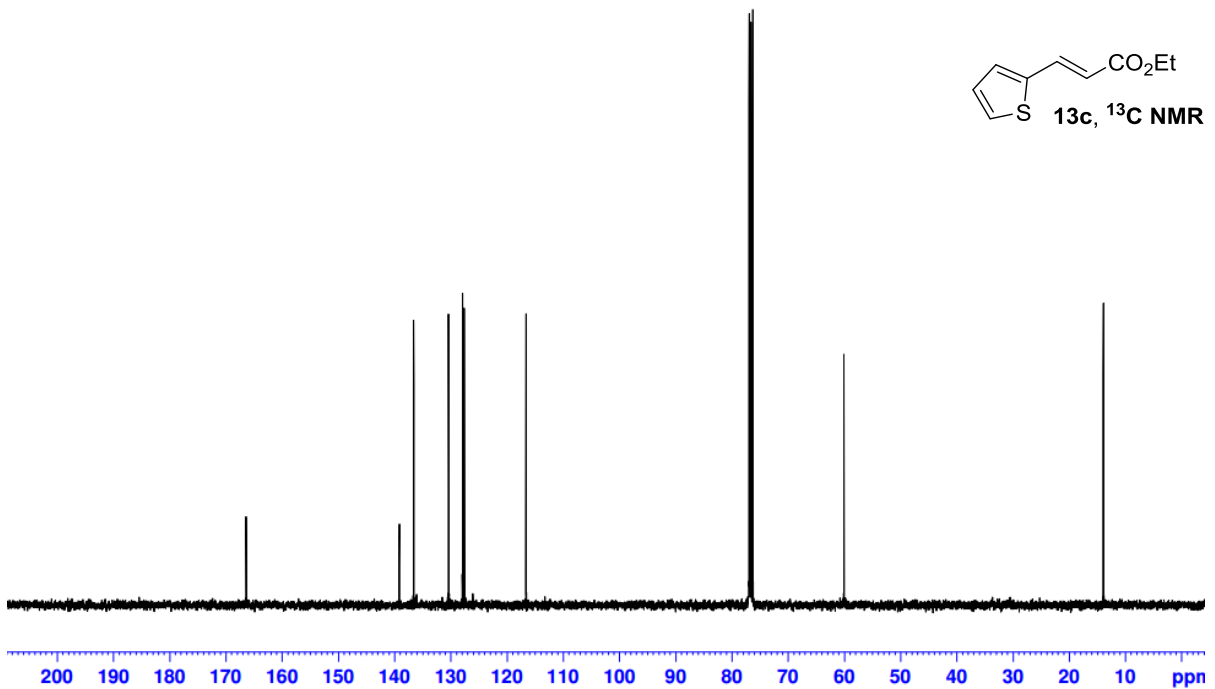

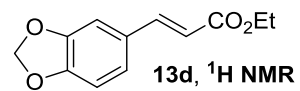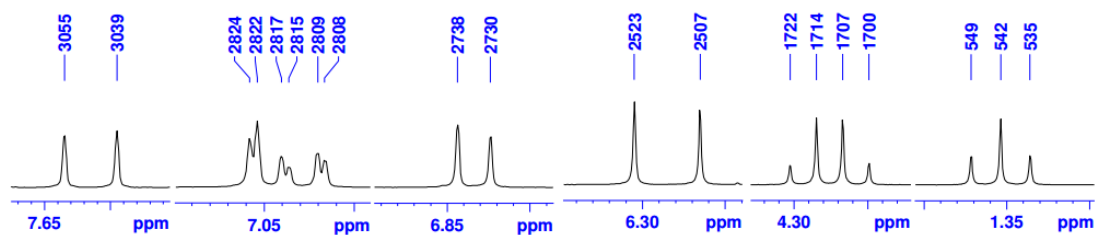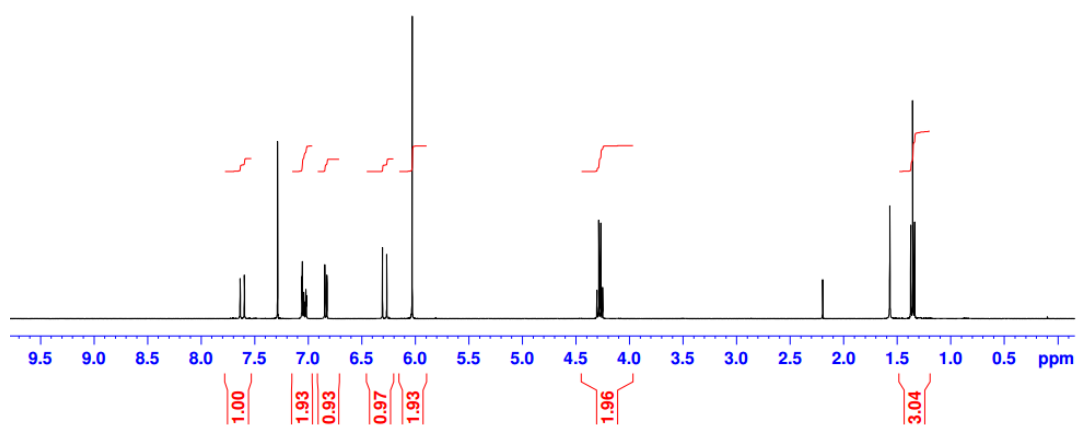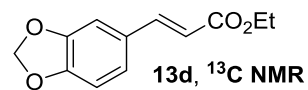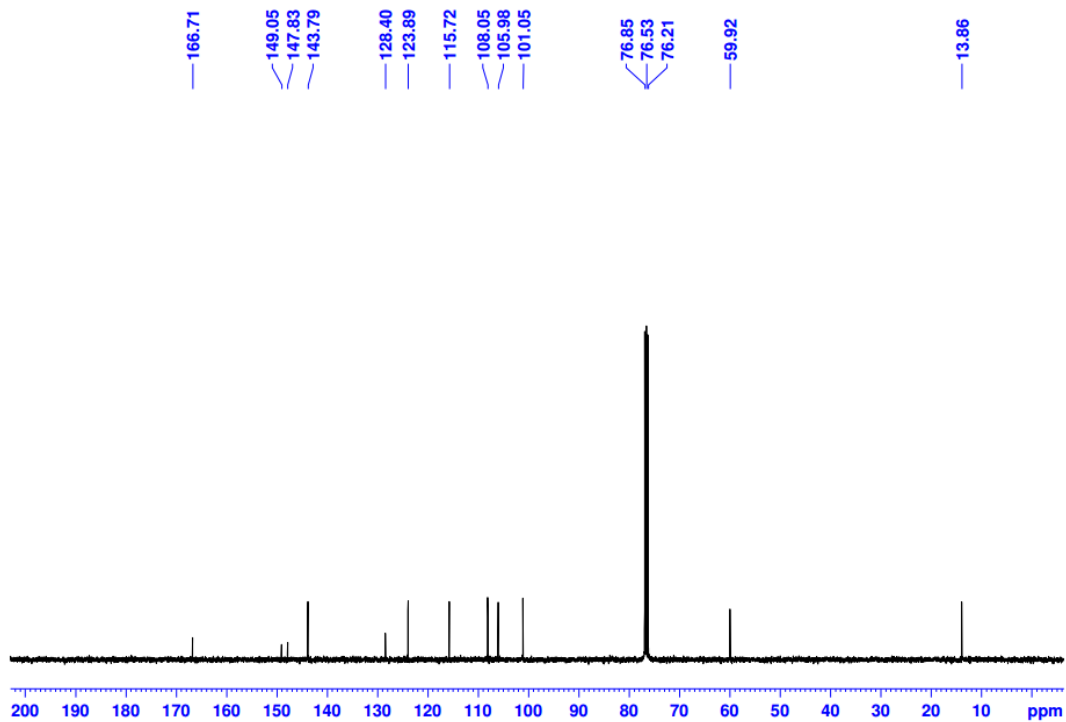

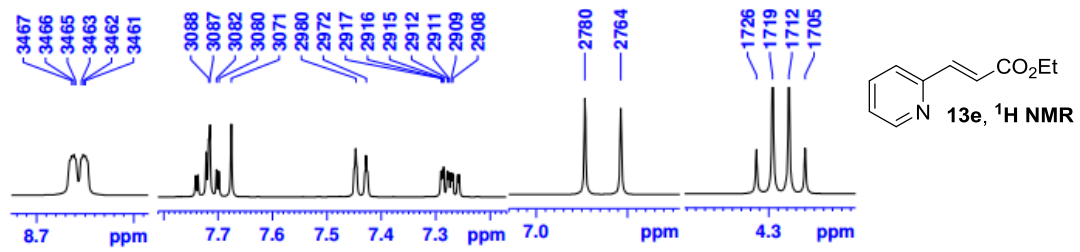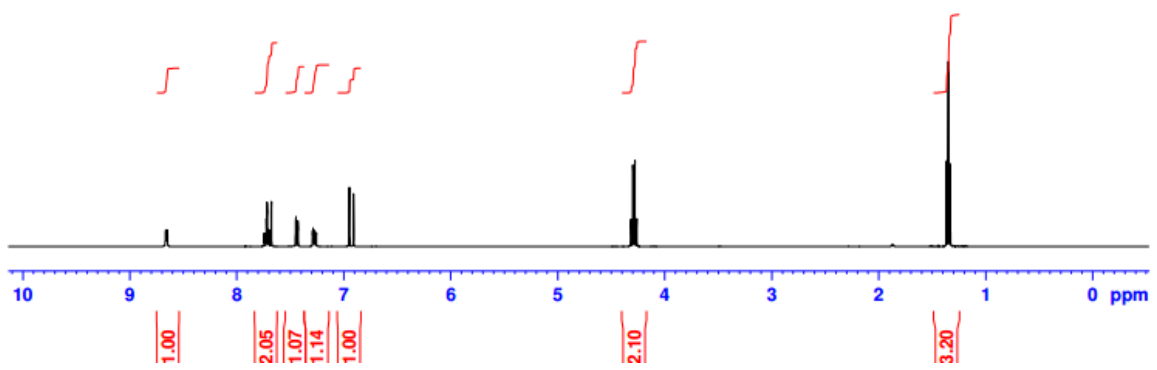

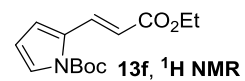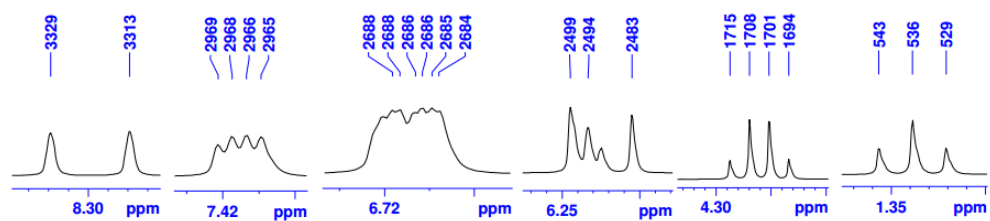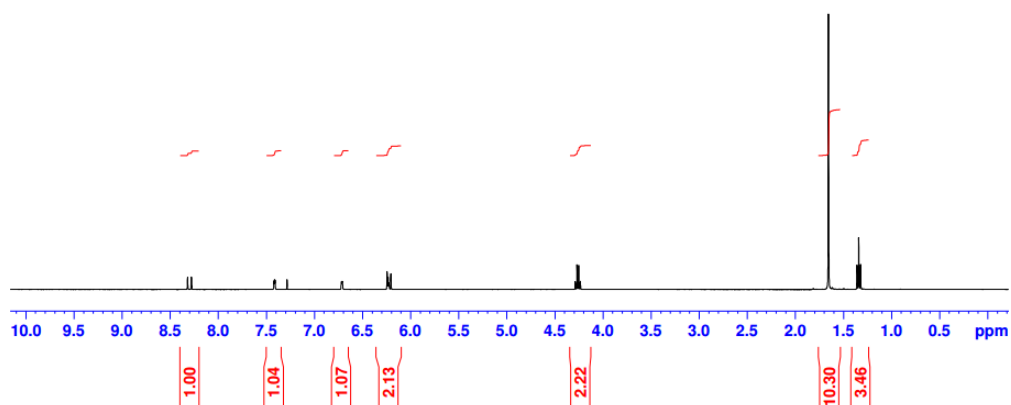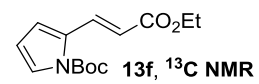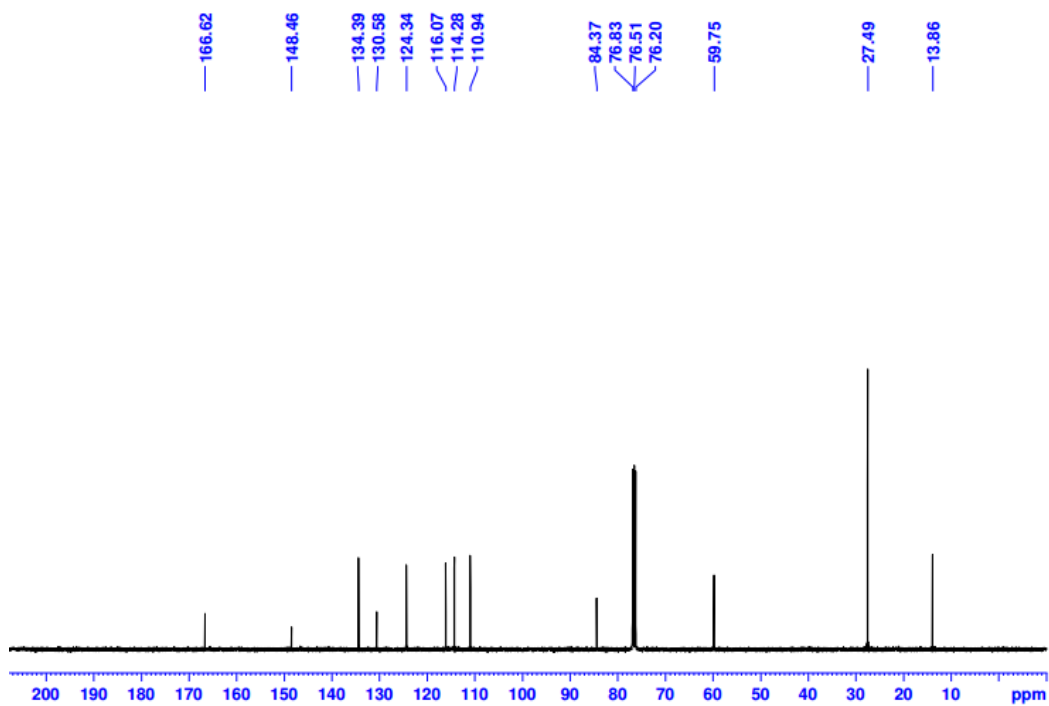

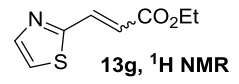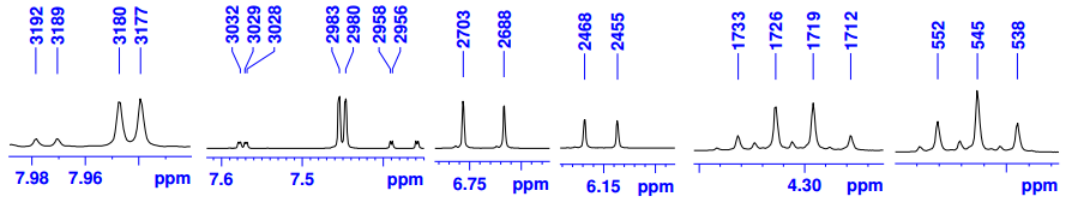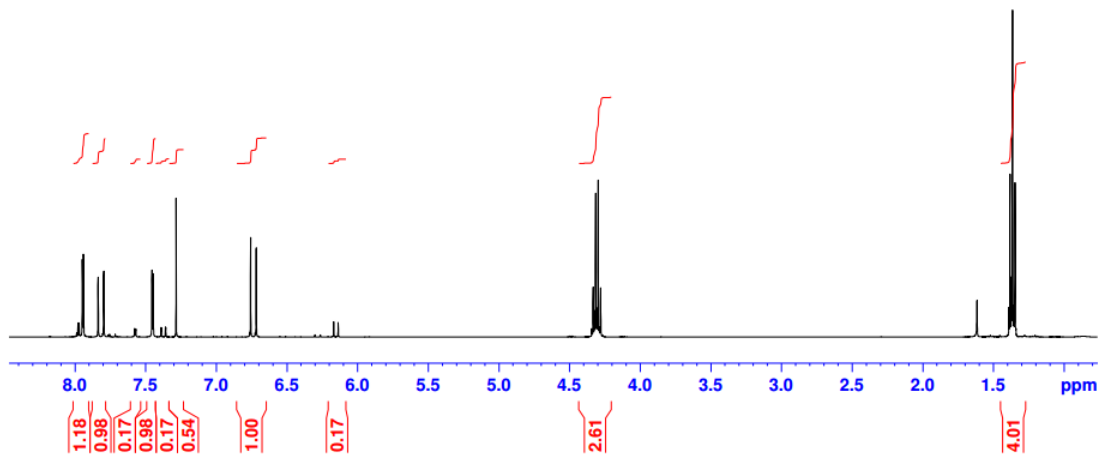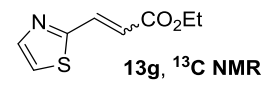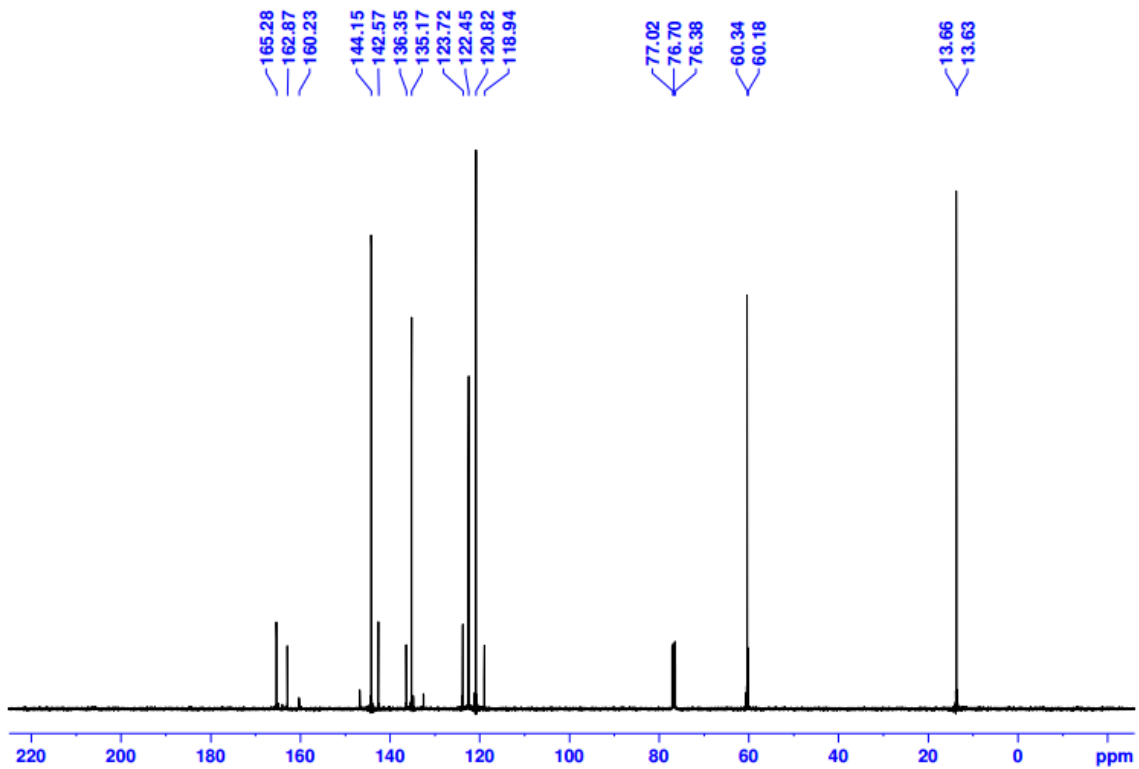

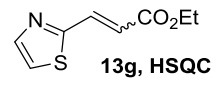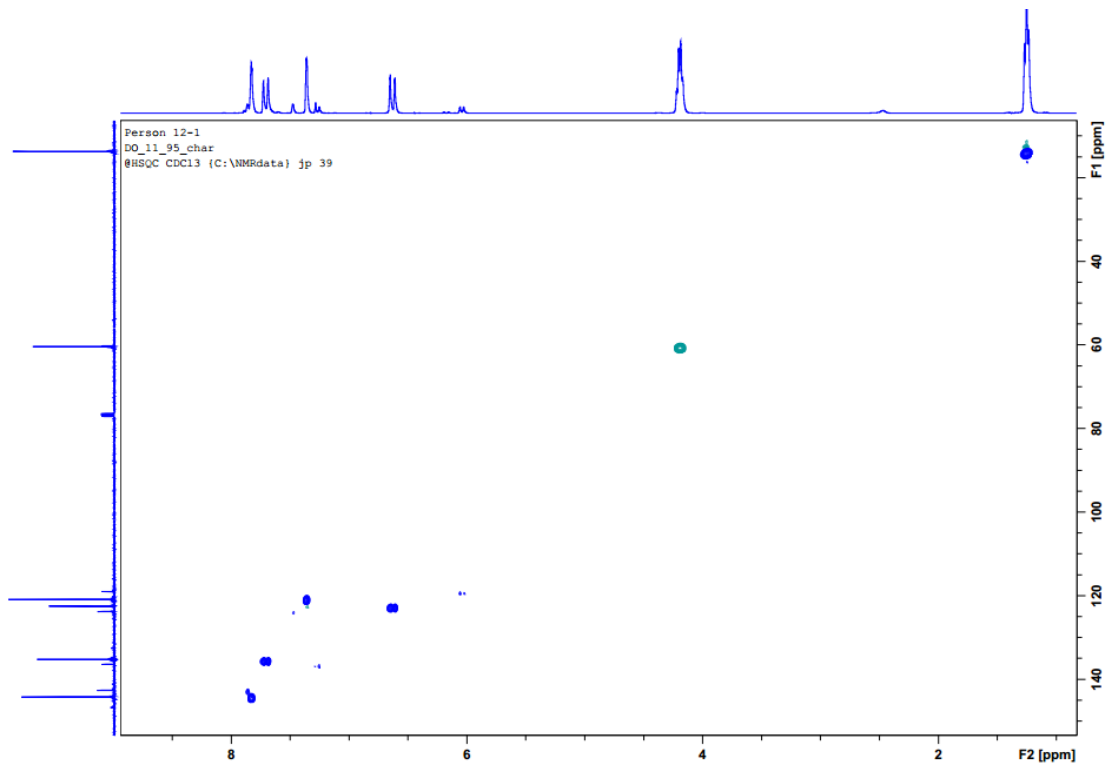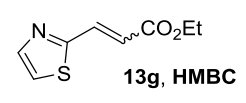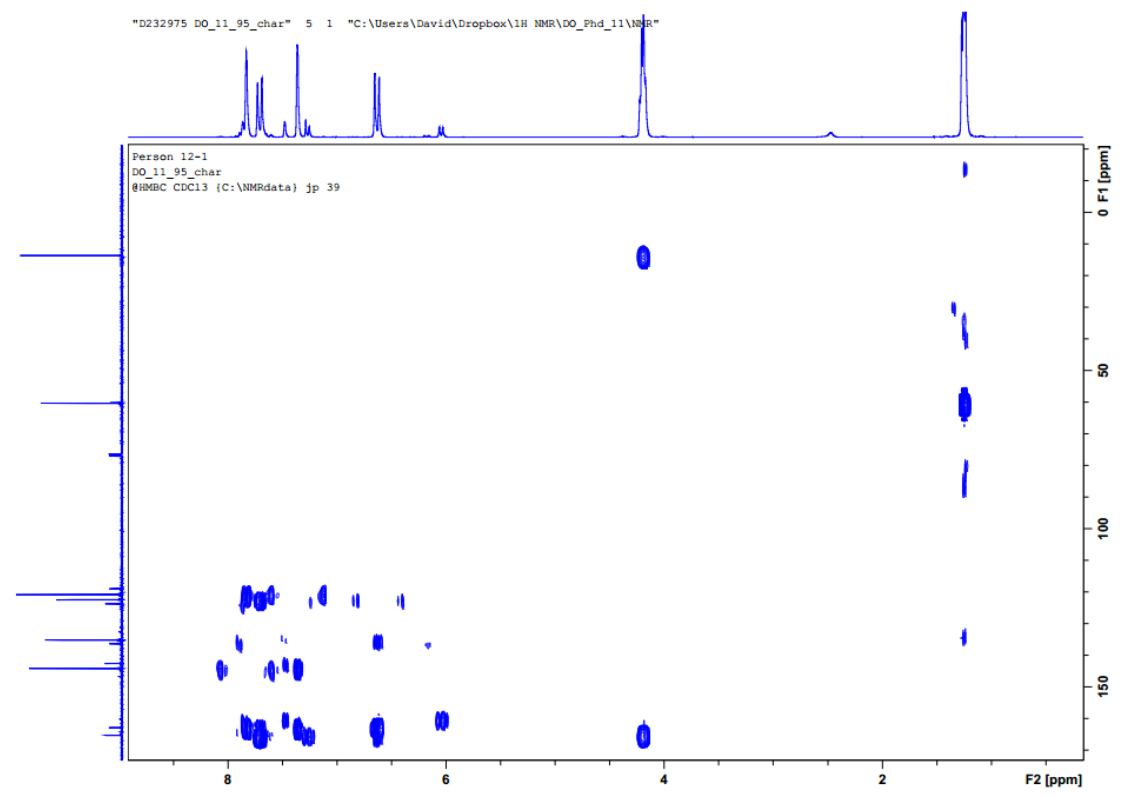

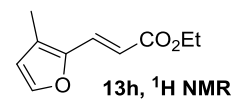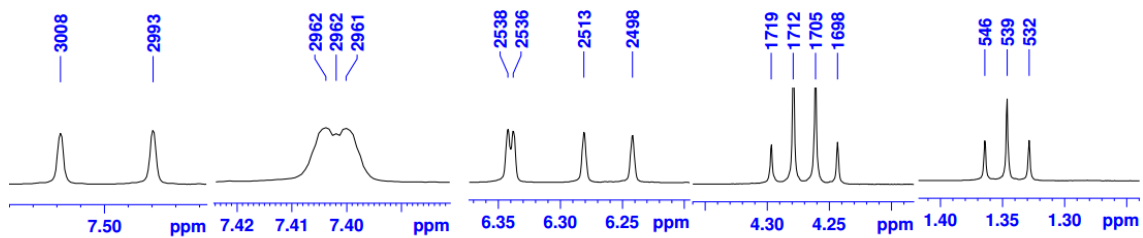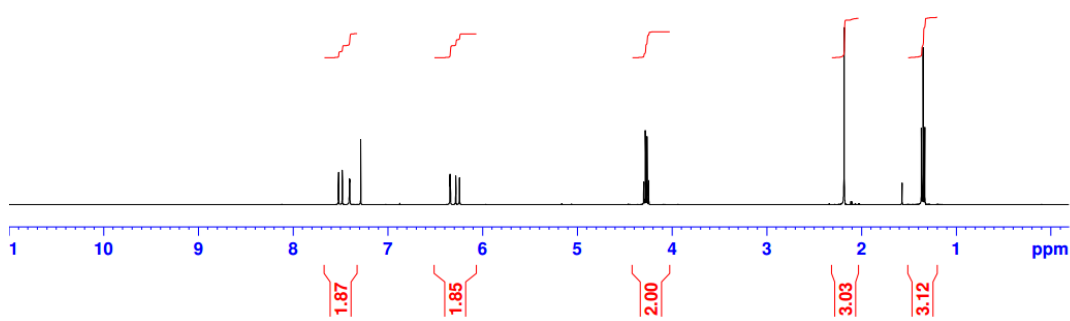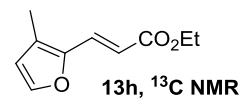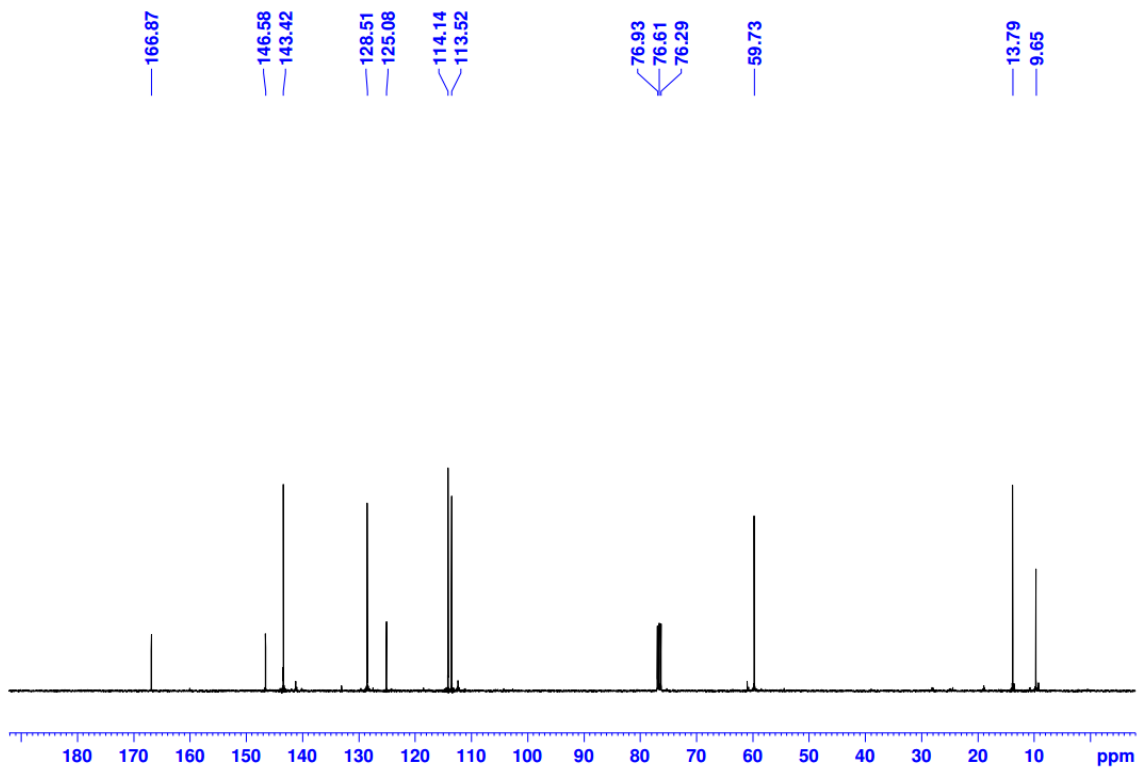

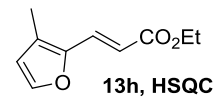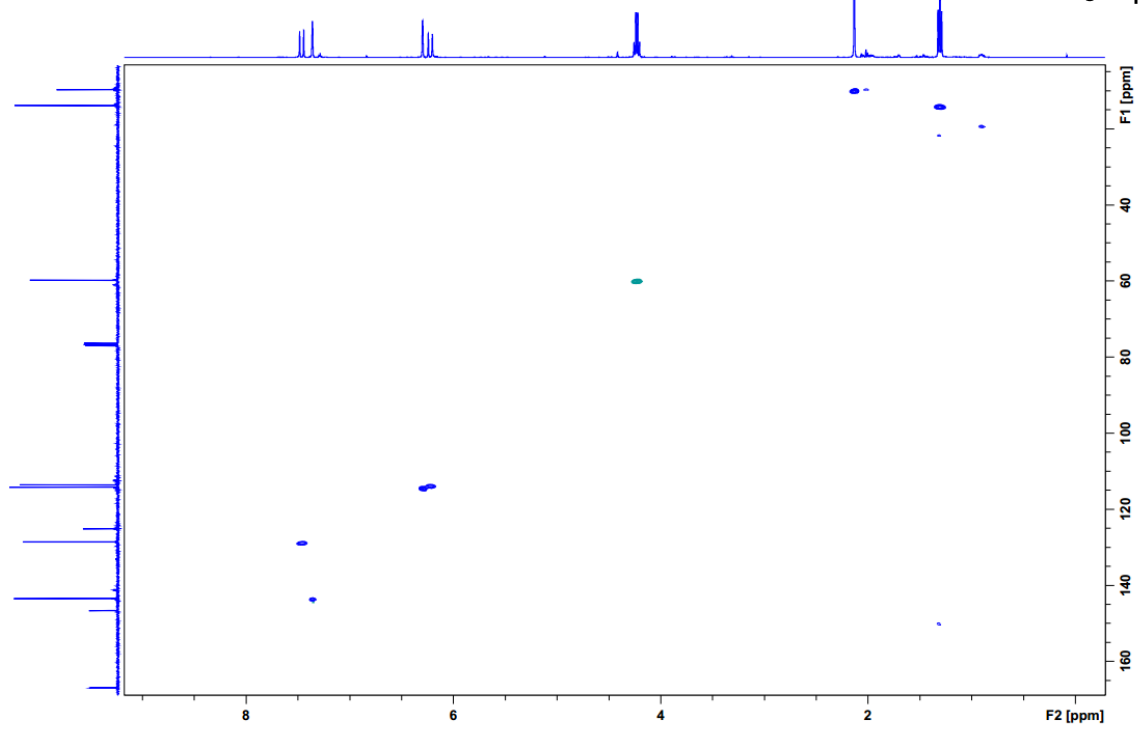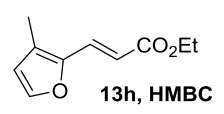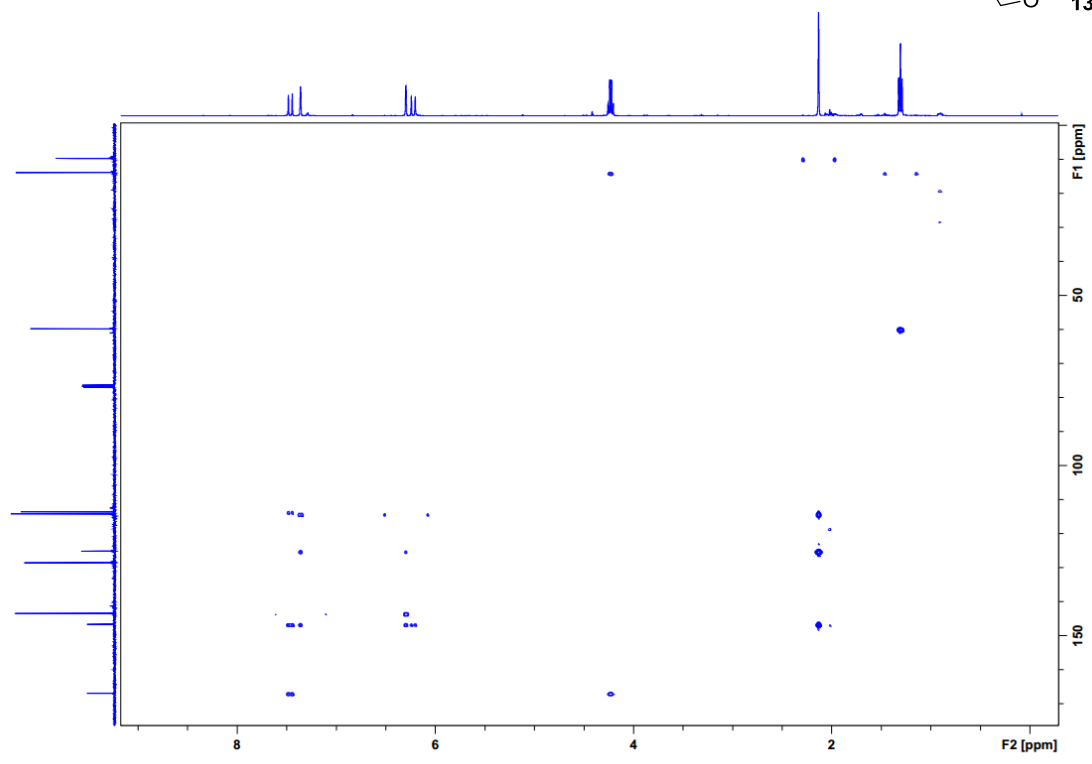



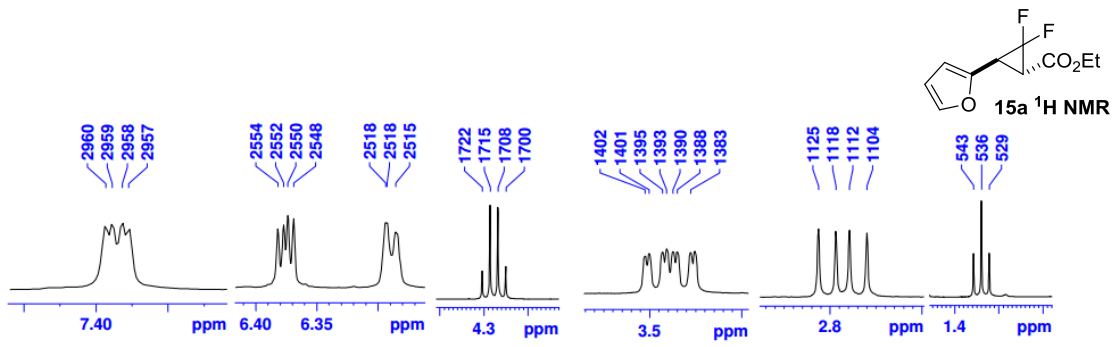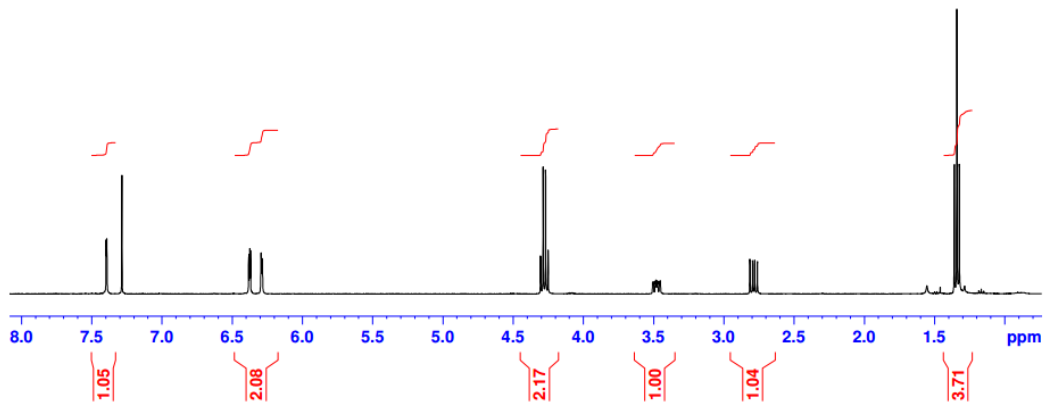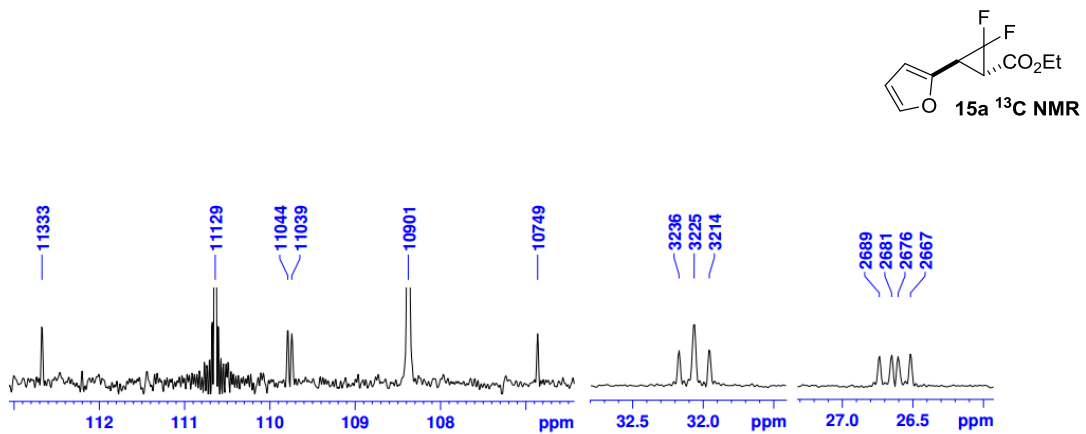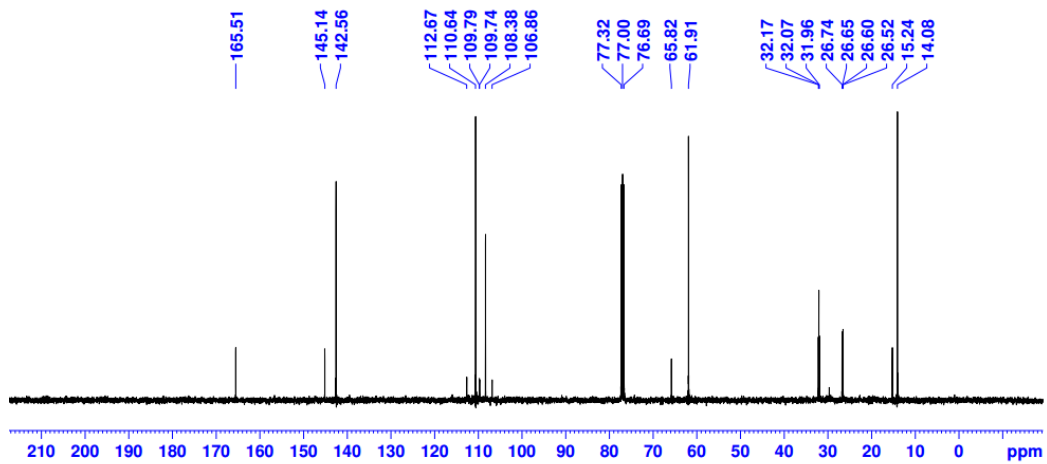

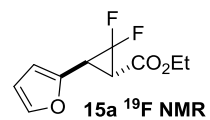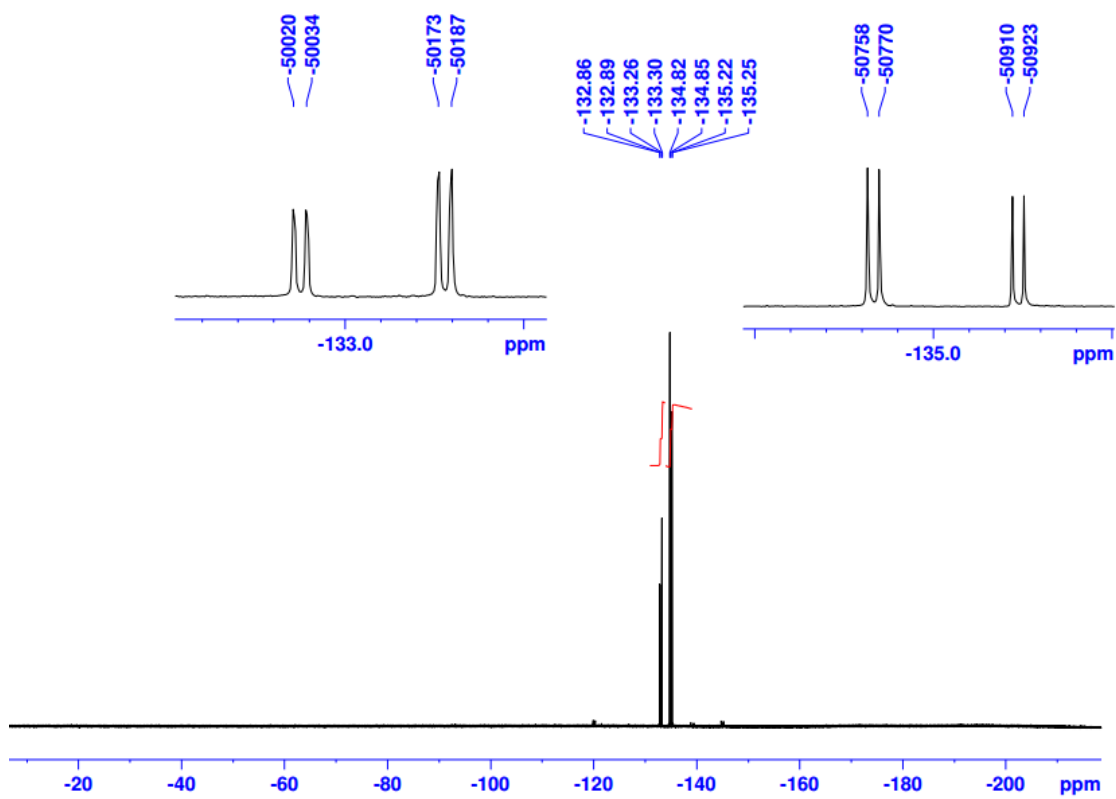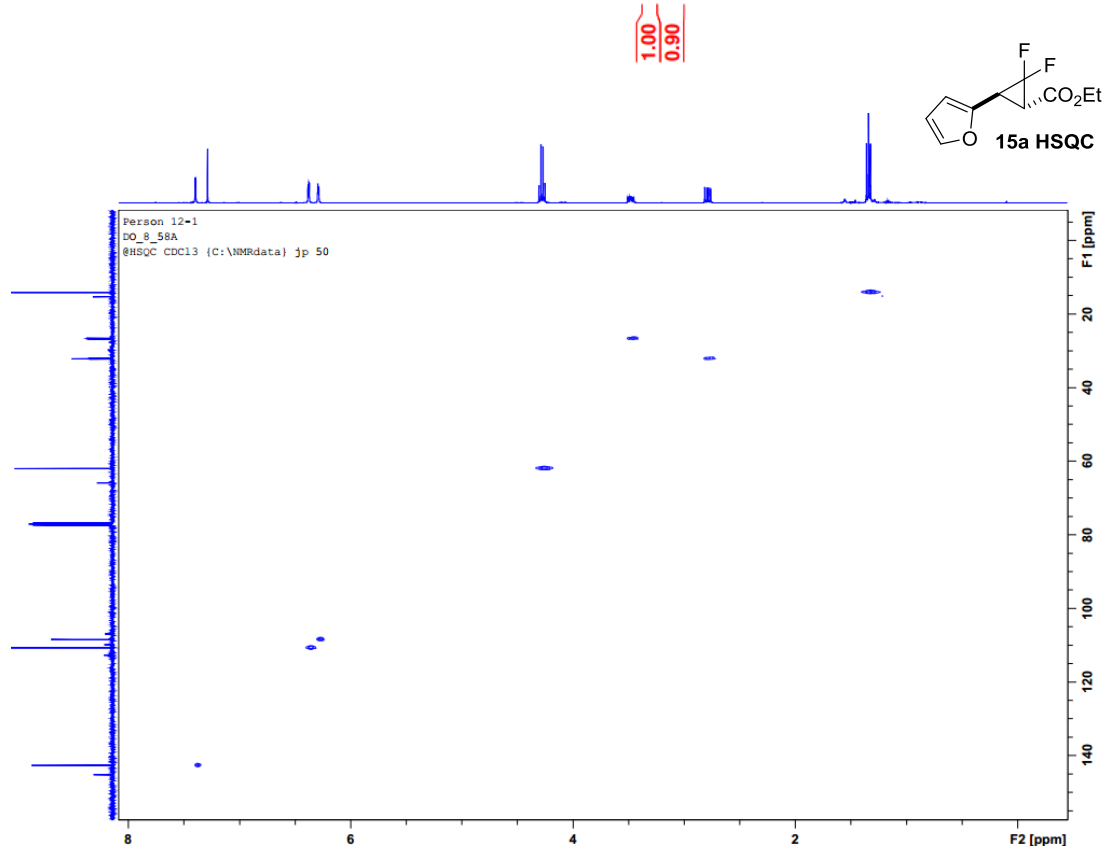

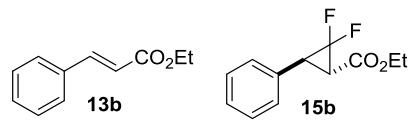

**<sup>1</sup>H crude spectra from incomplete difluorocyclopropanation of 13b.**

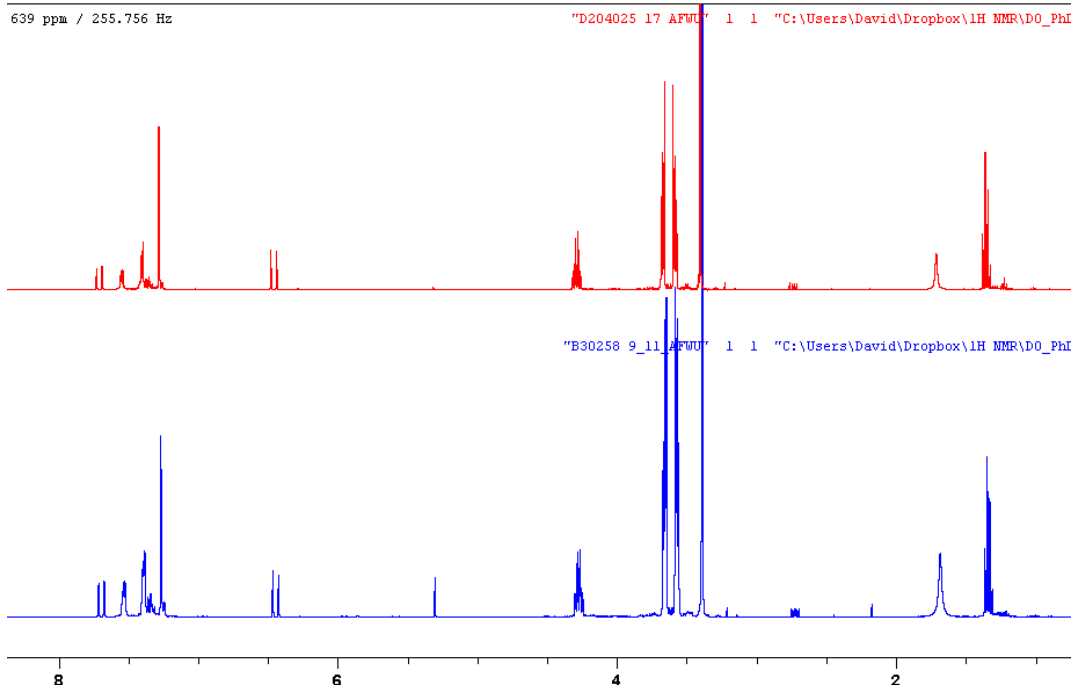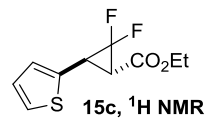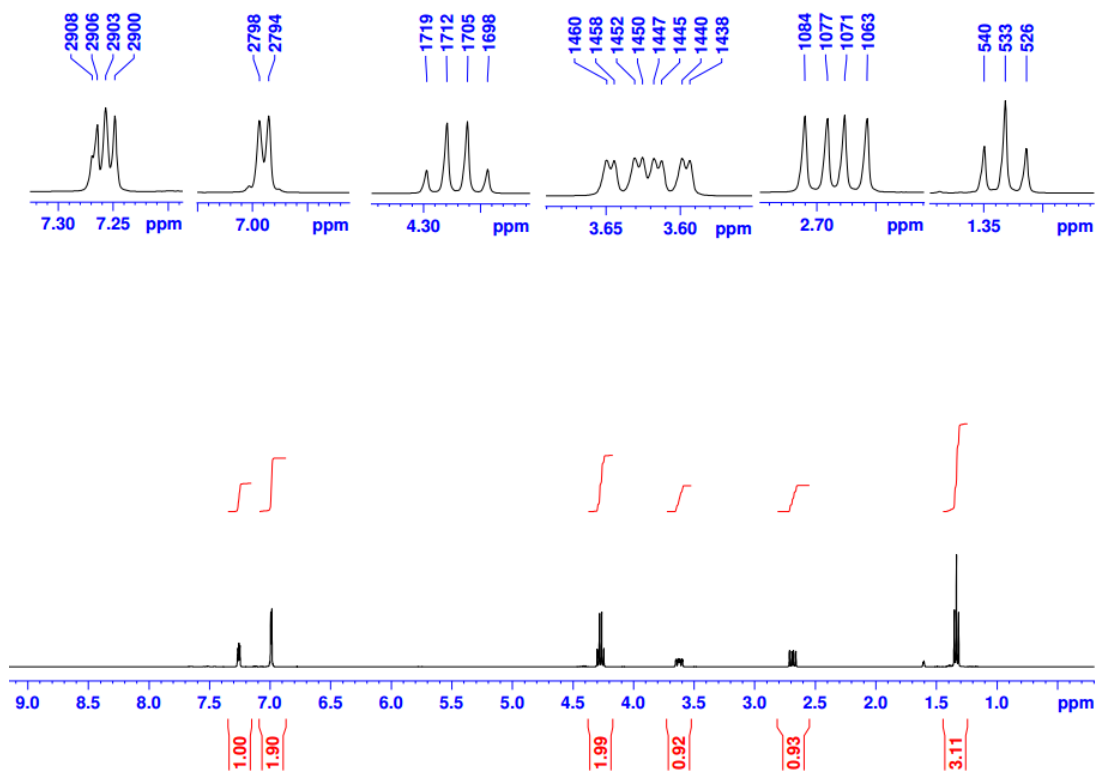

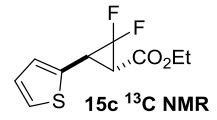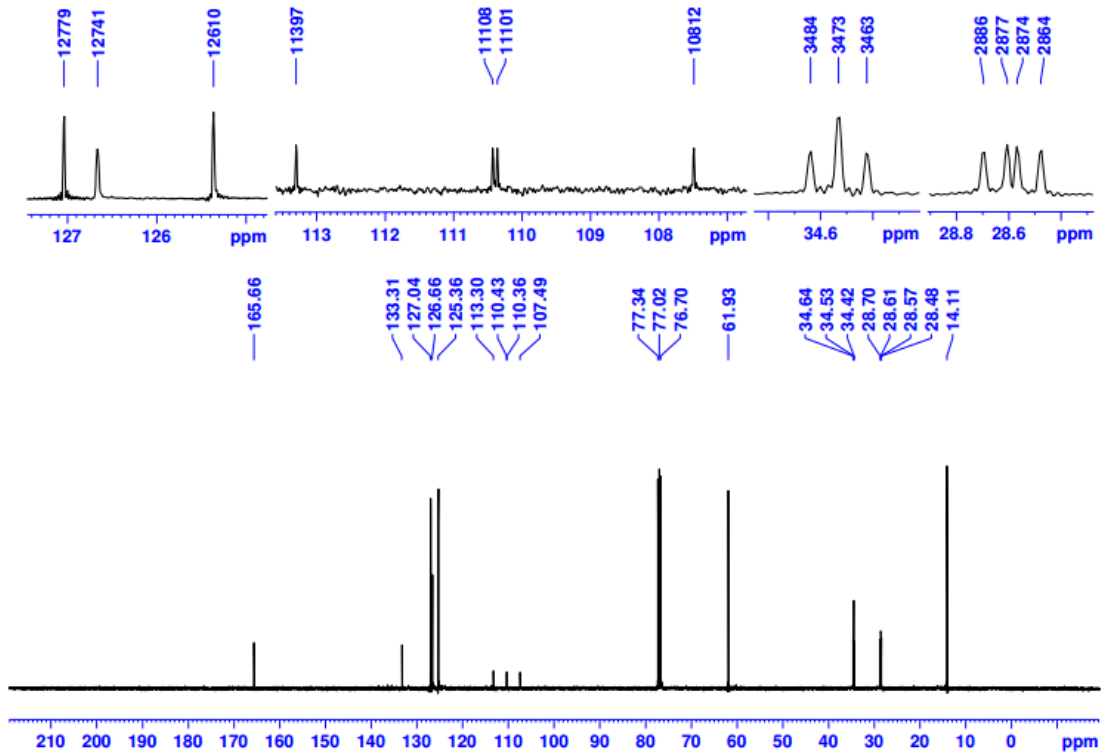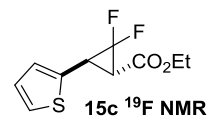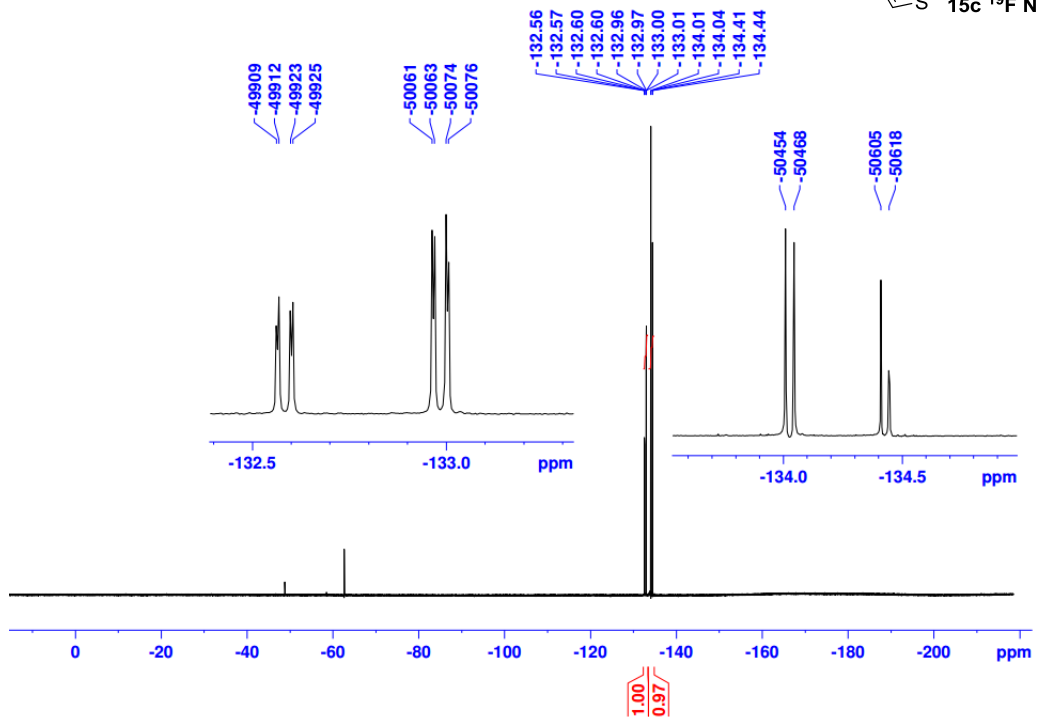

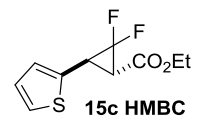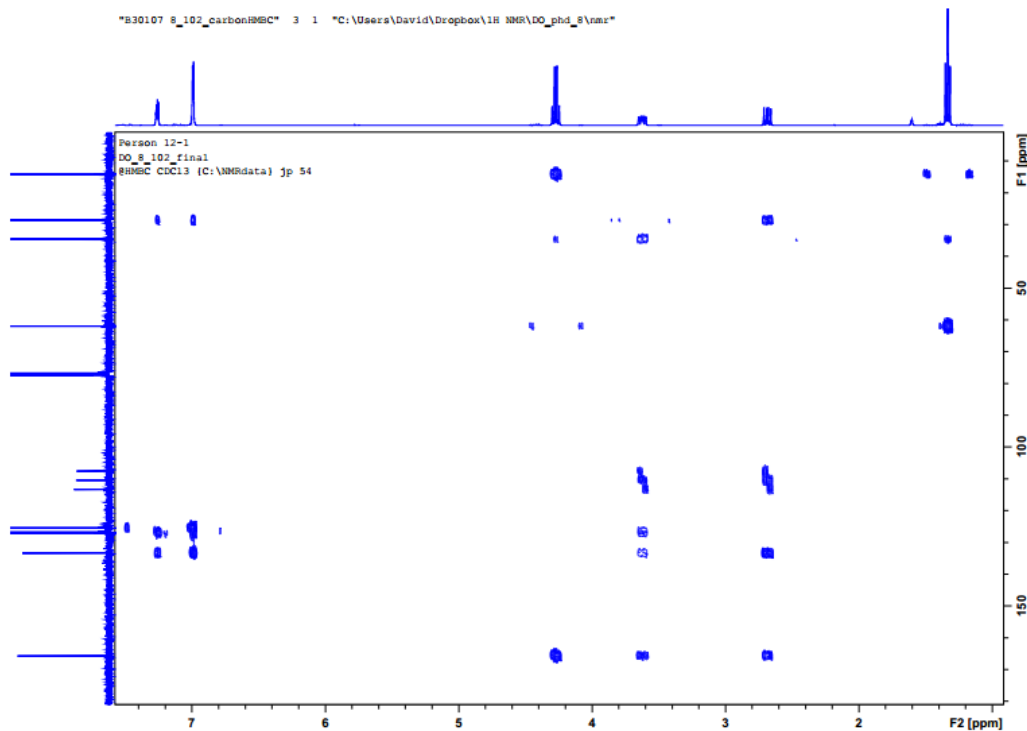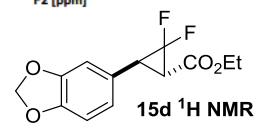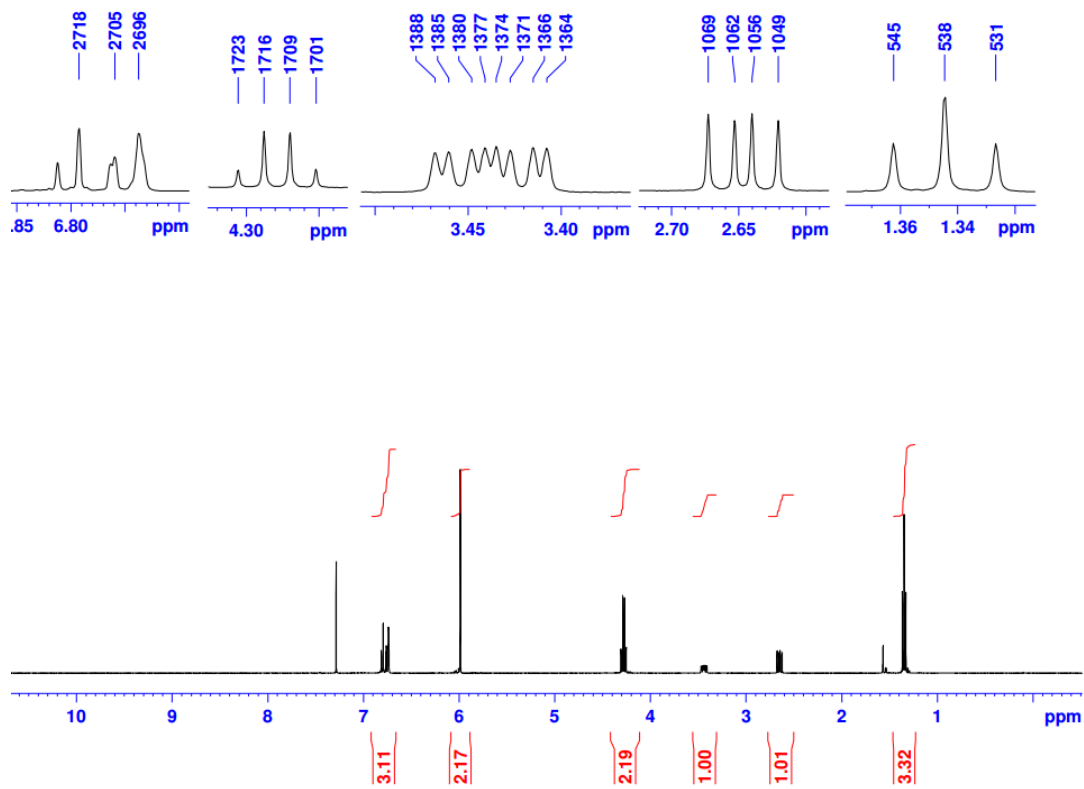

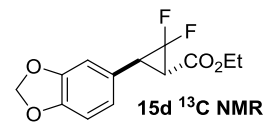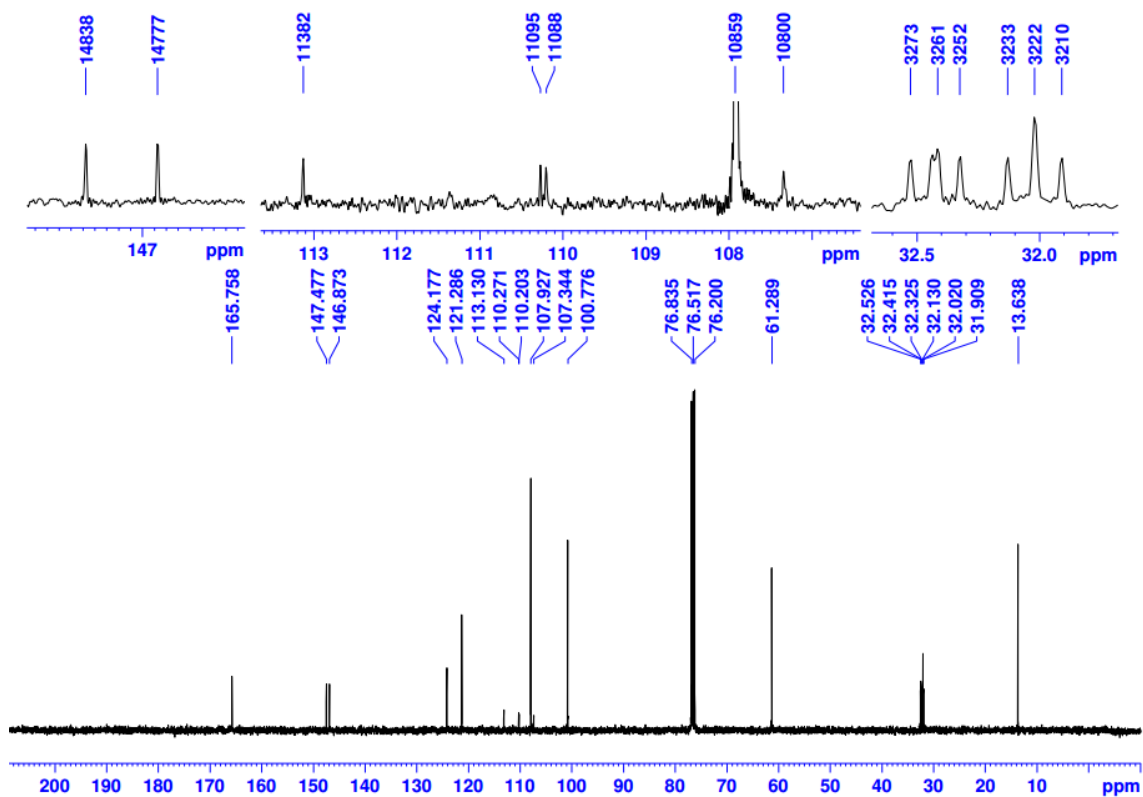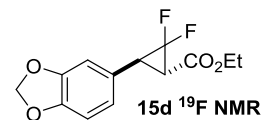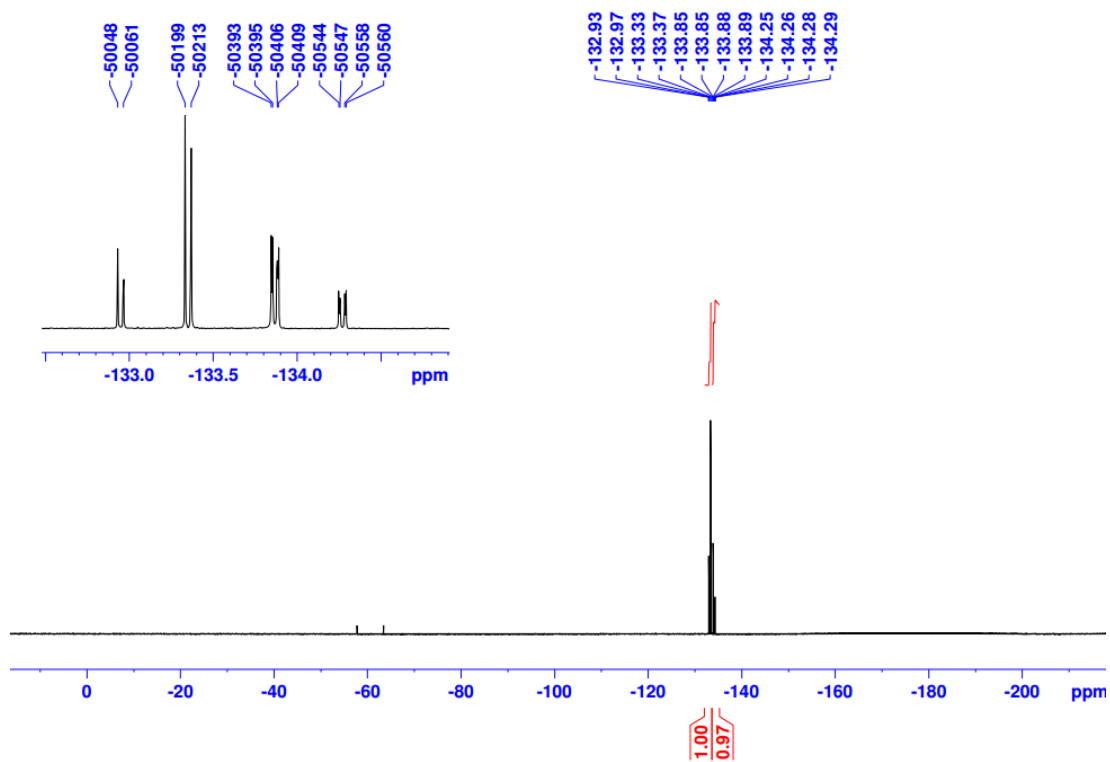

"D204781\_9\_19\_char" 4 1 "C:\Users\David\Dropbox\1H NMR\DO\_PhD\_9\NMR"

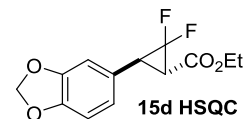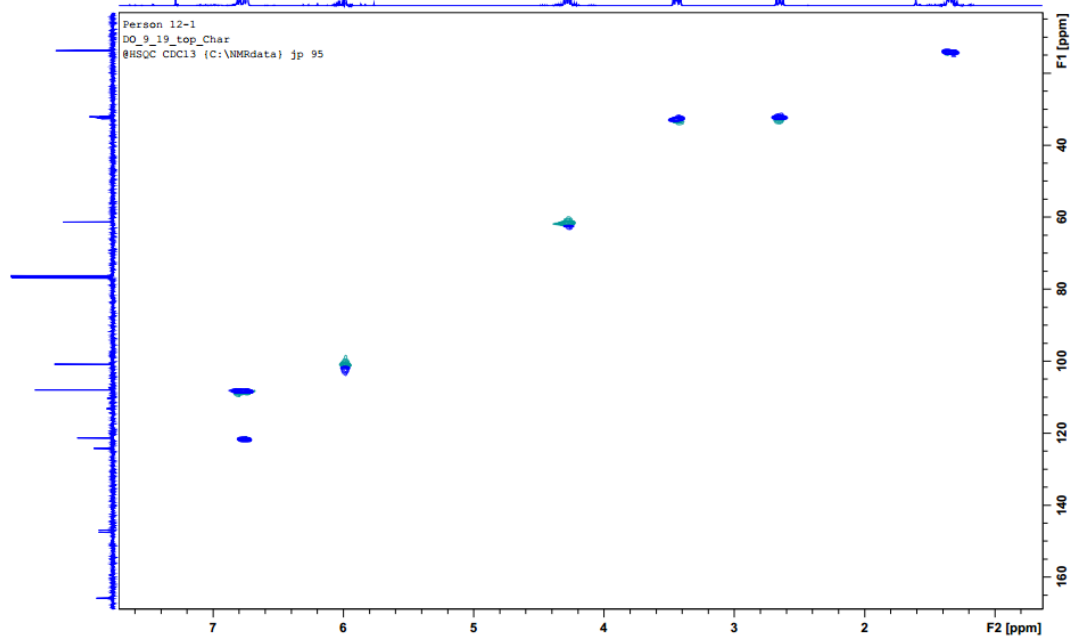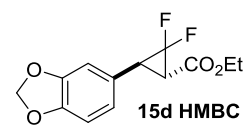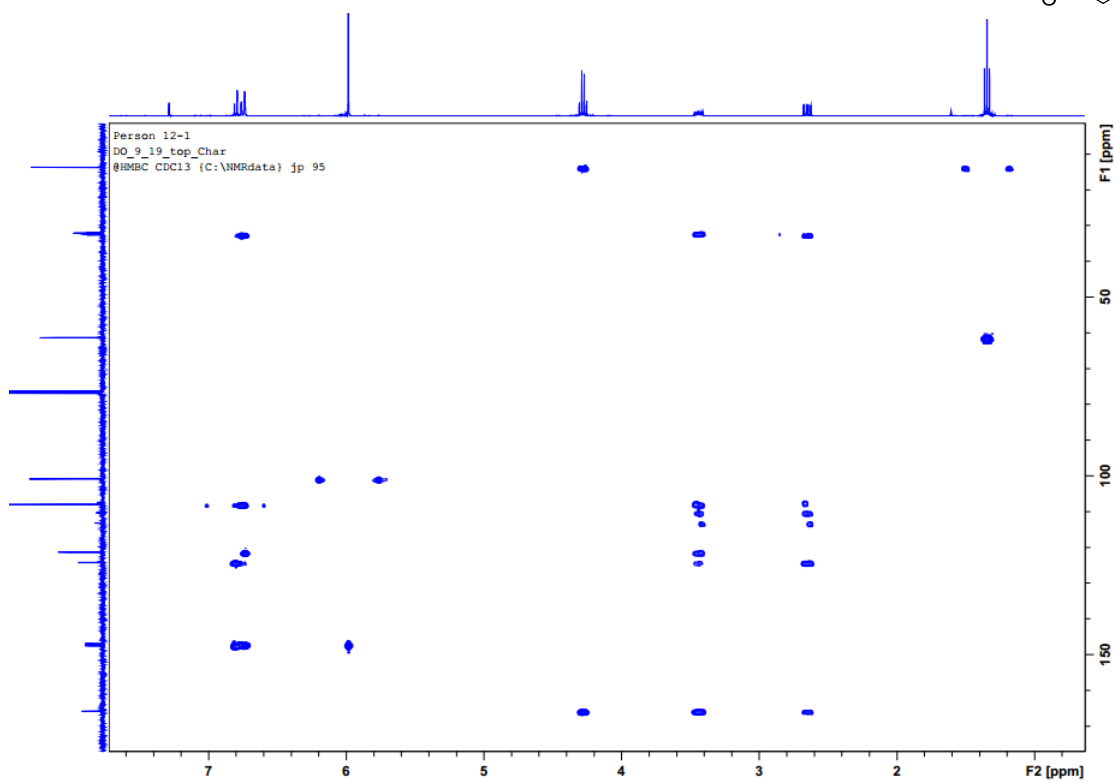

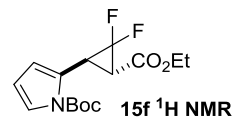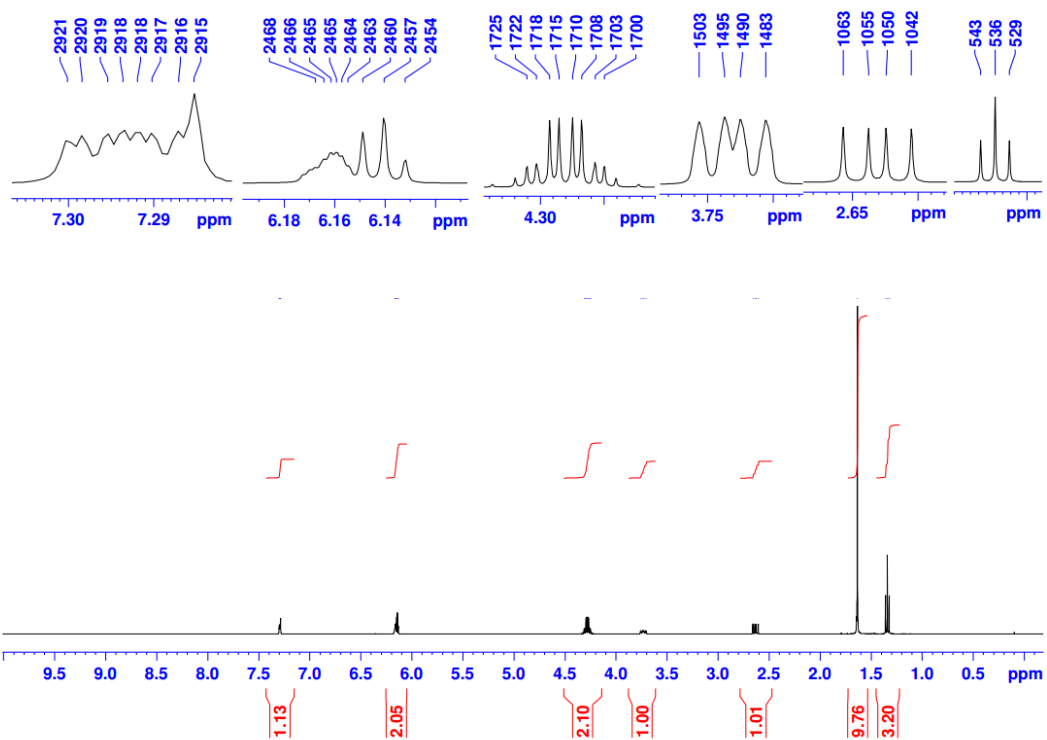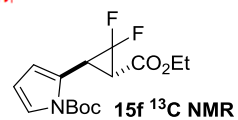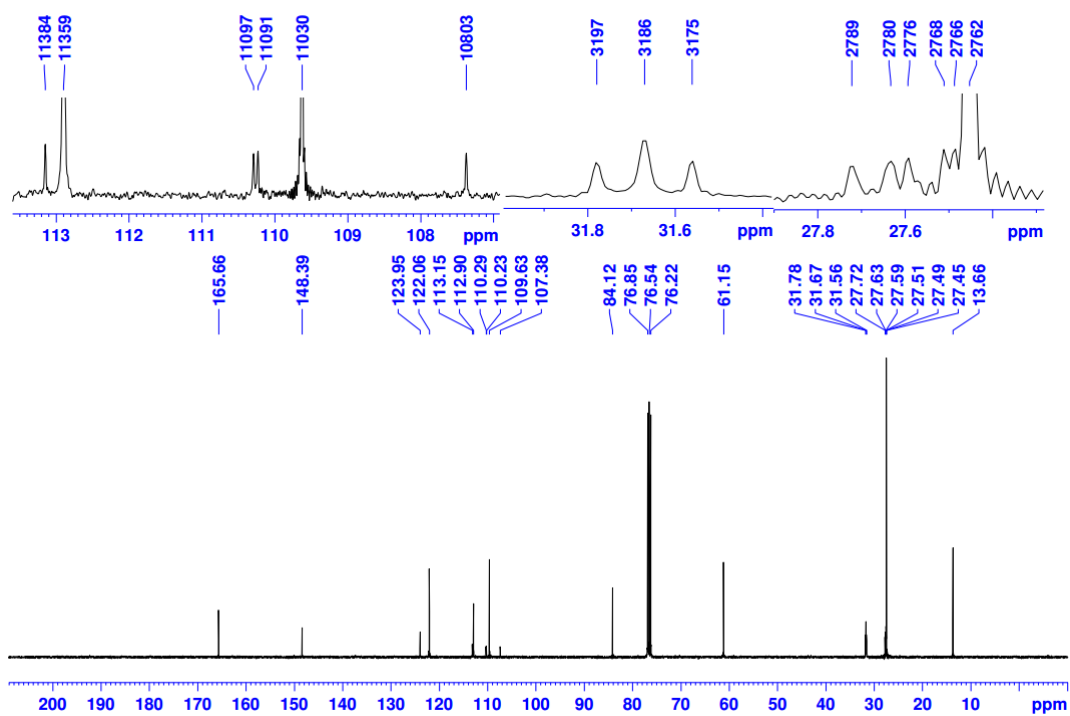



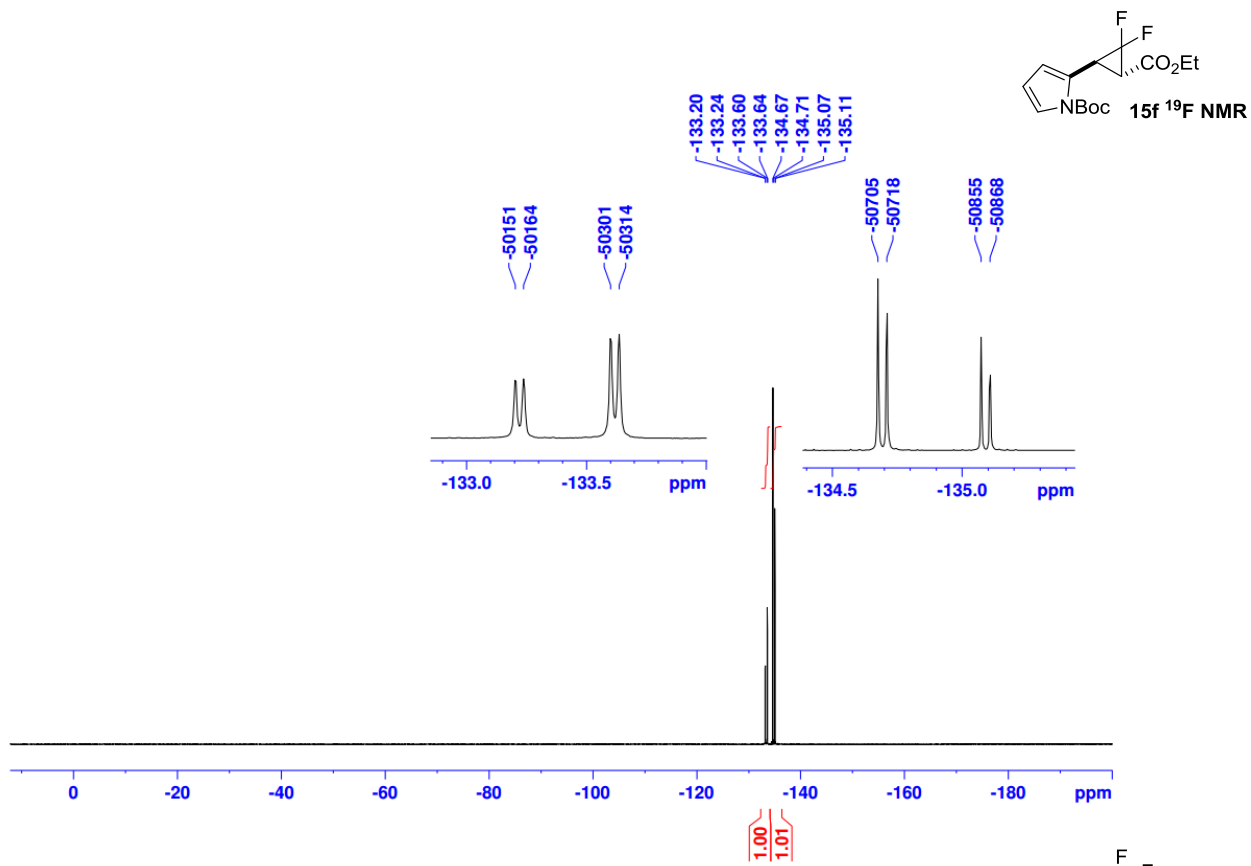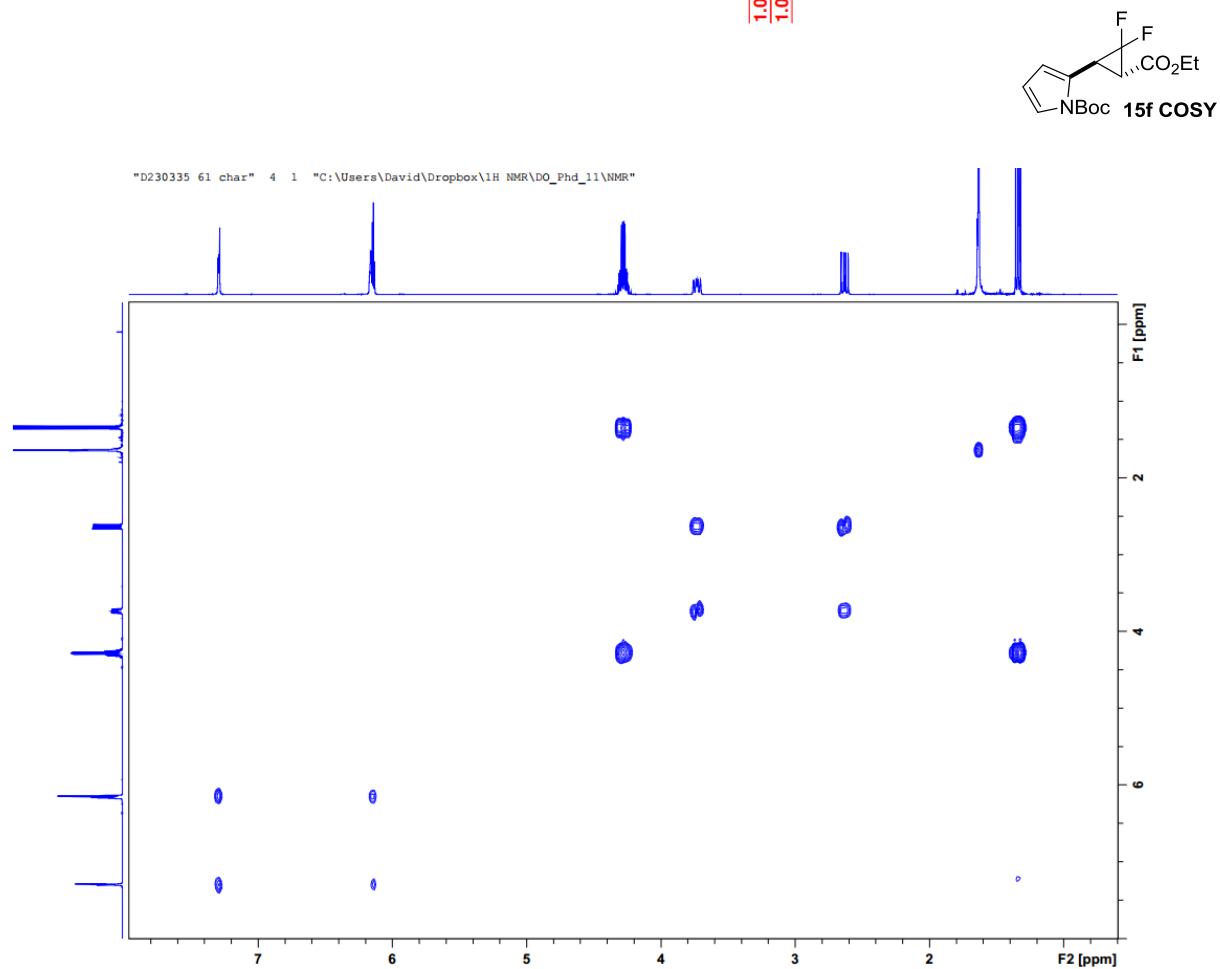

"D230335 61 char" 6 1 "C:\Users\David\Dropbox\1H NMR\DO\_PhD\_11\NMR"

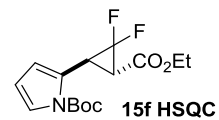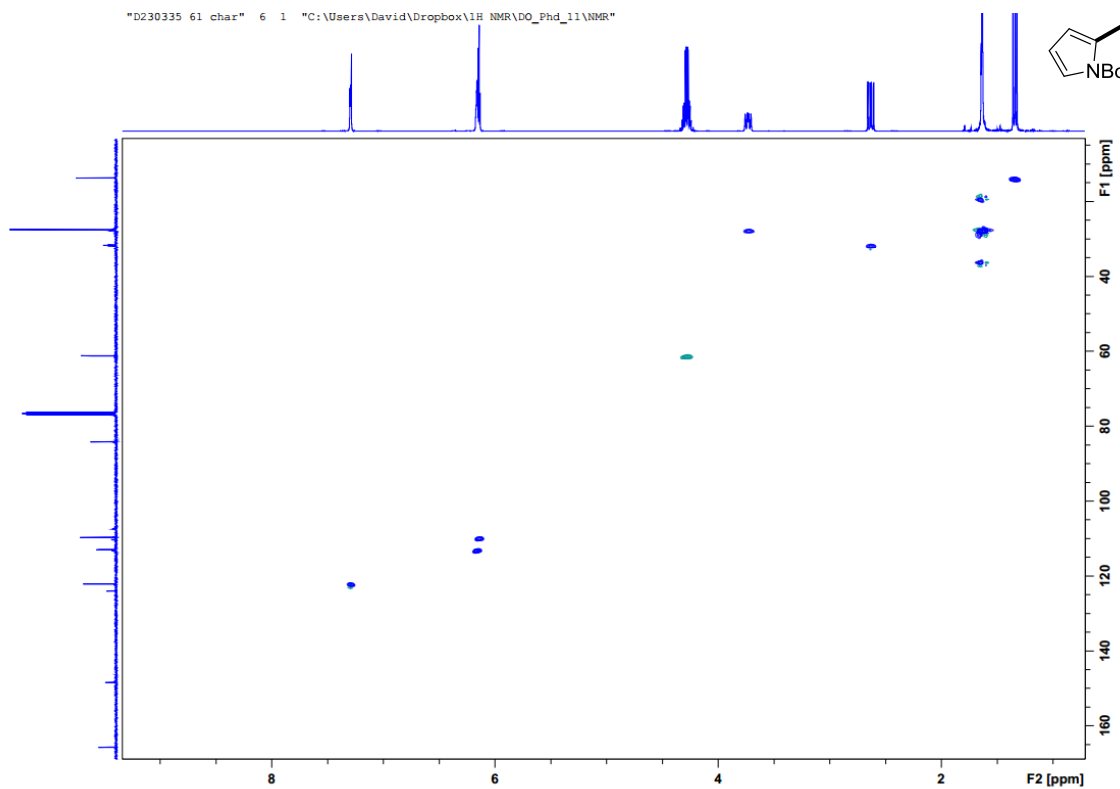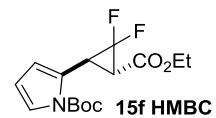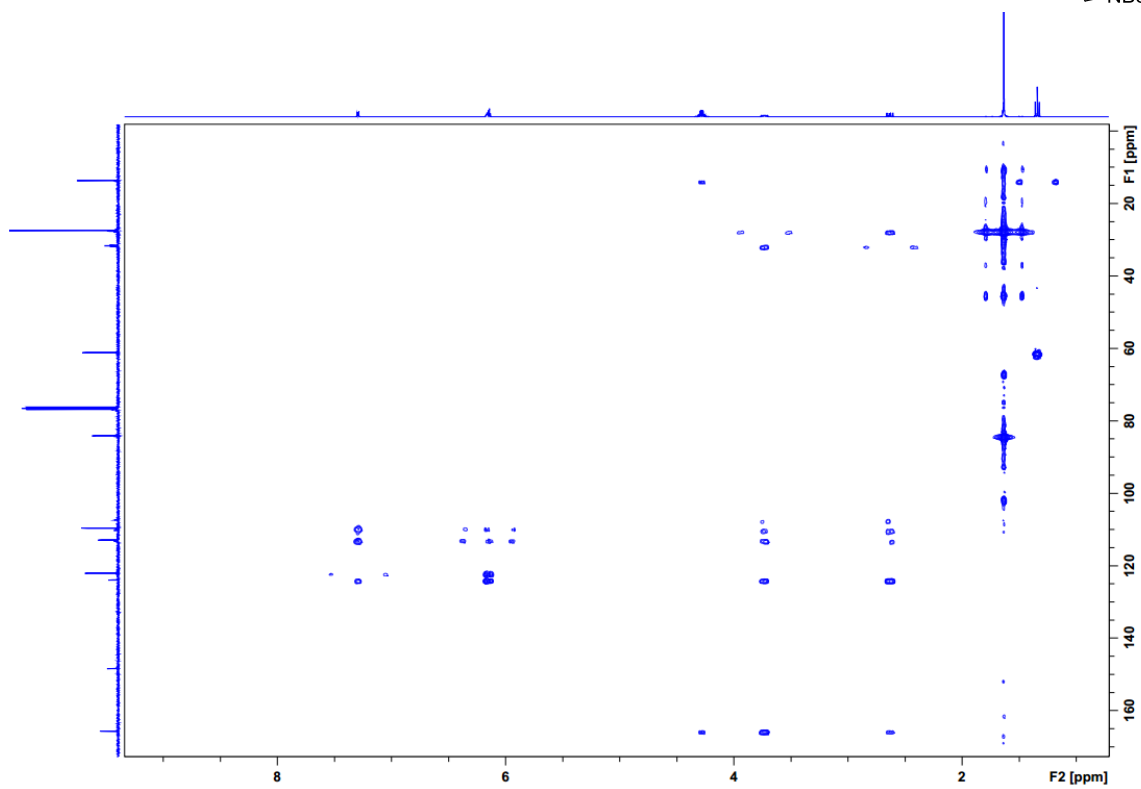

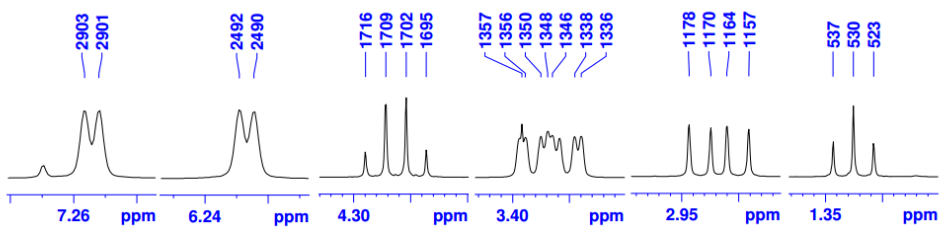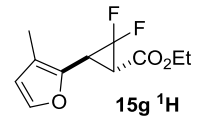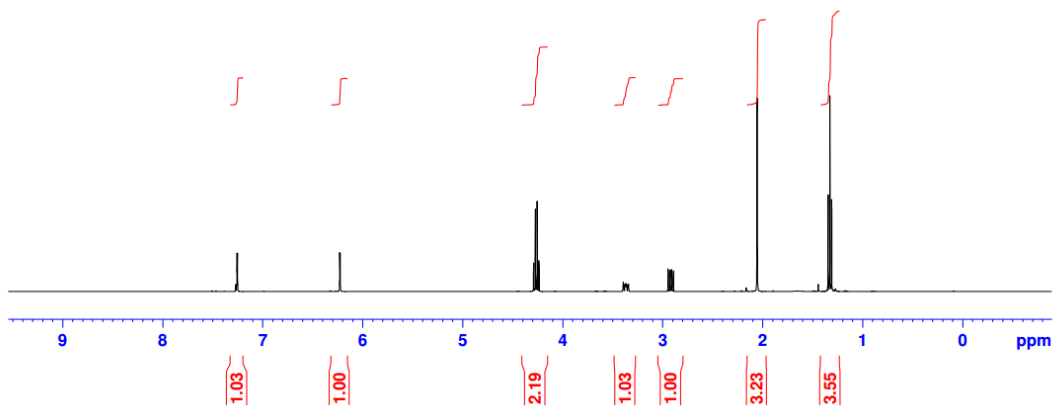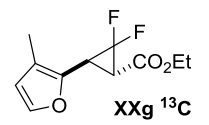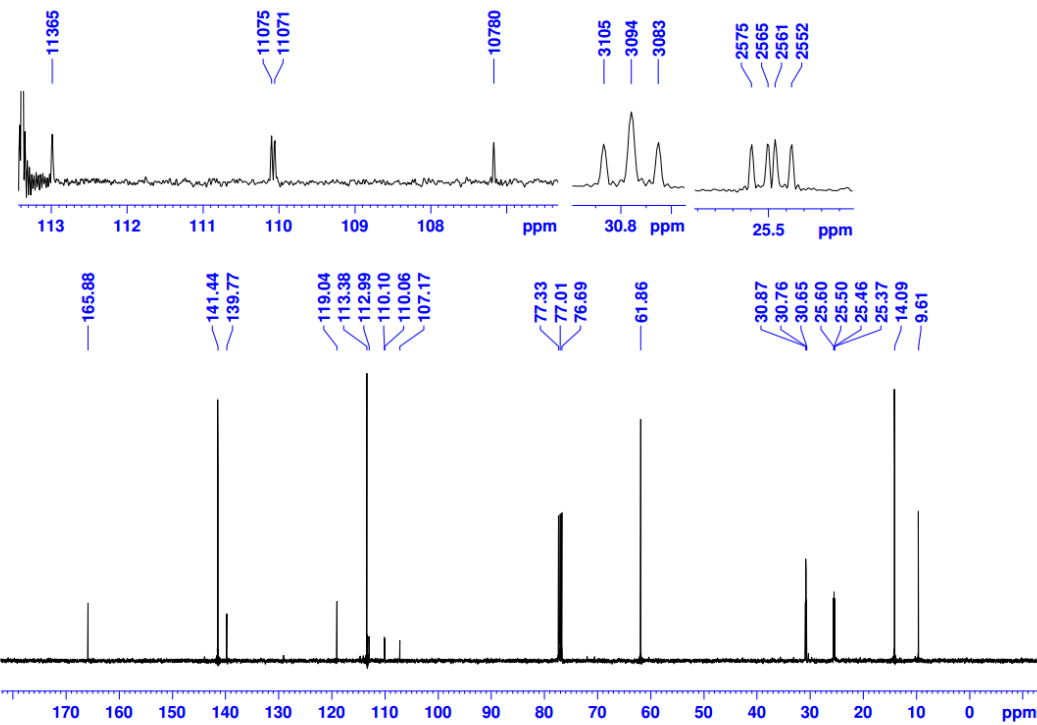

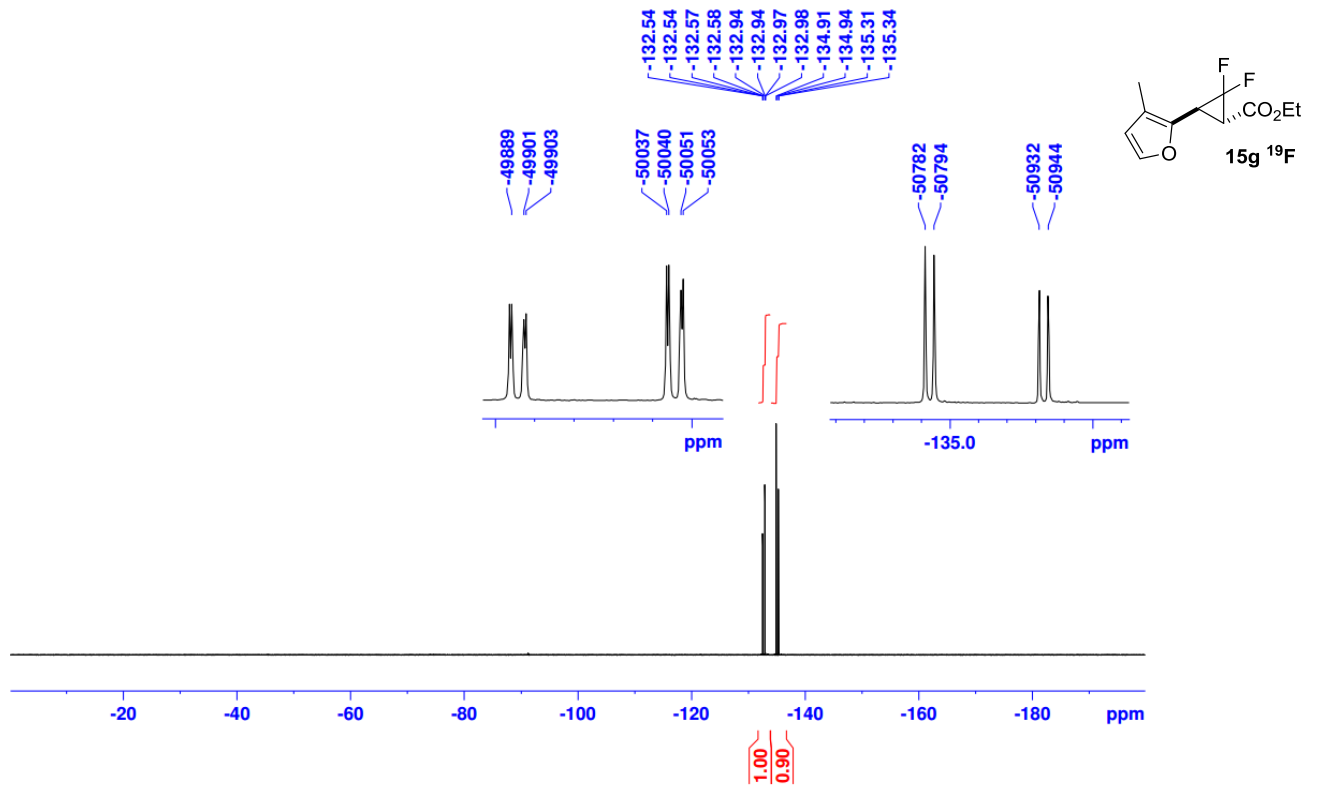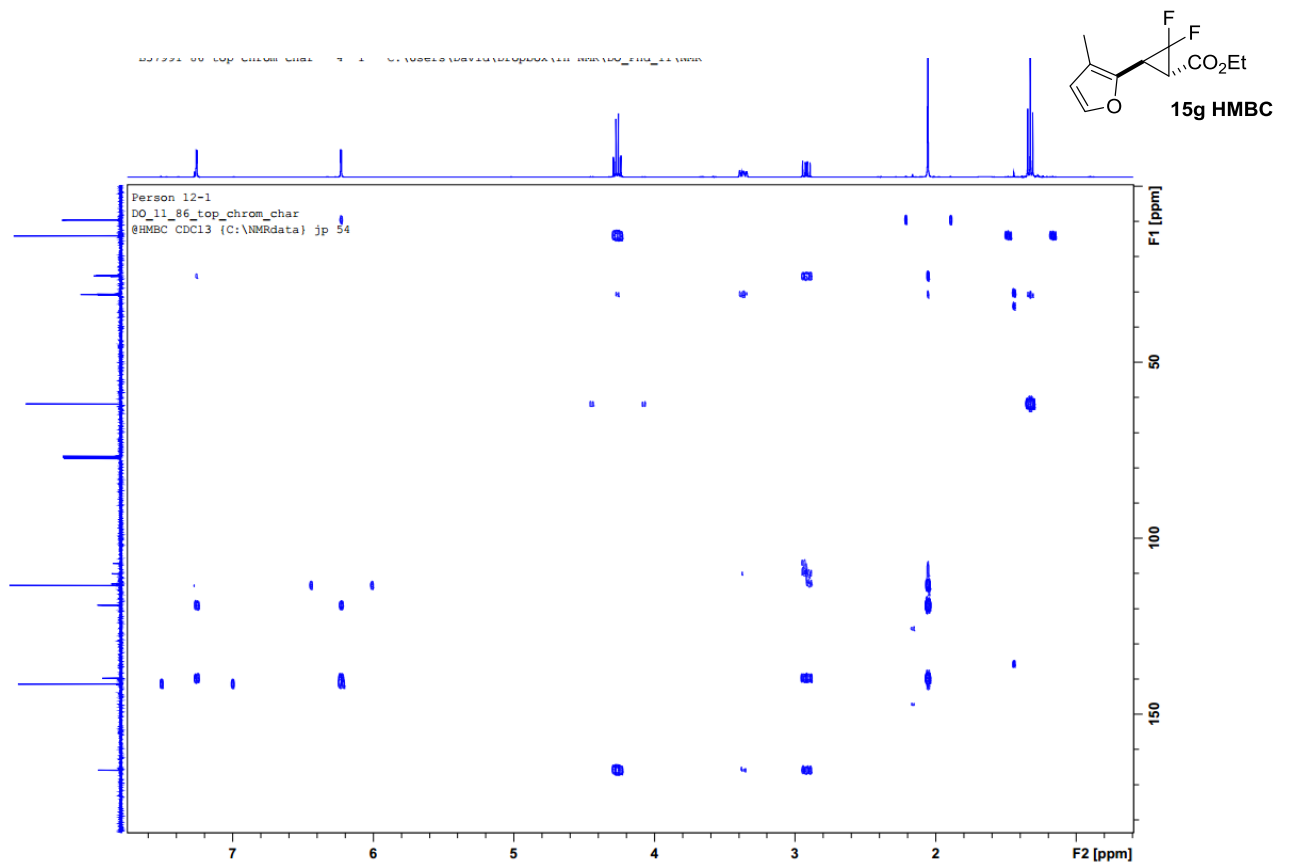

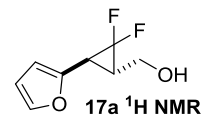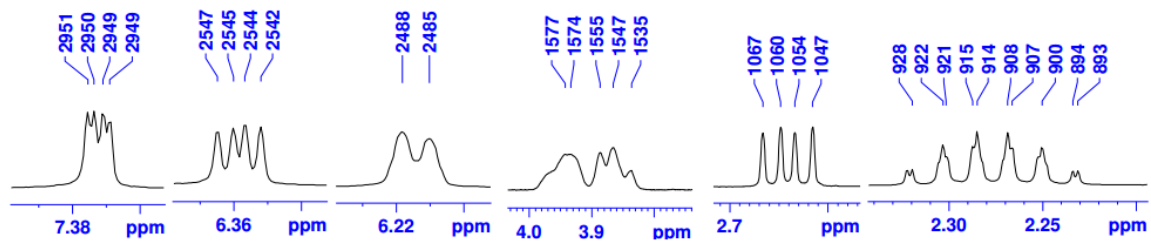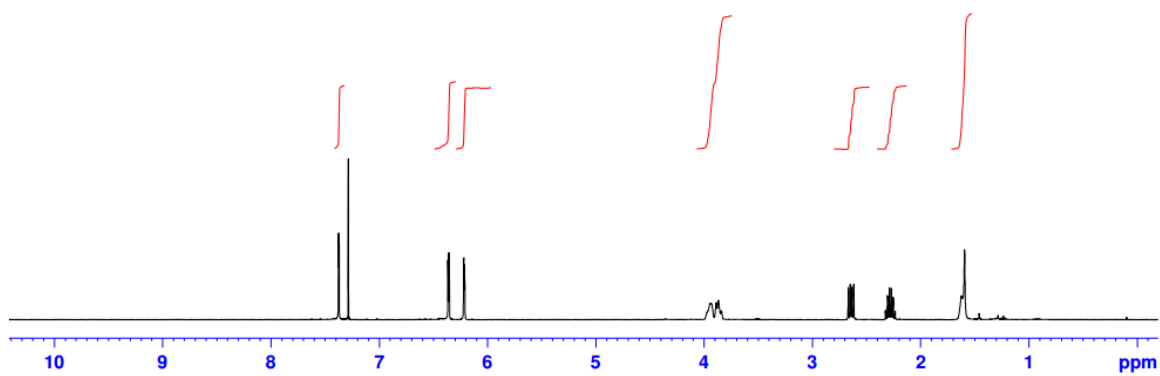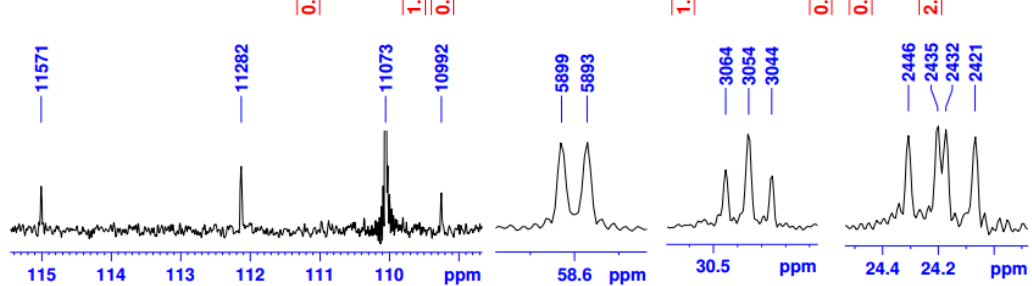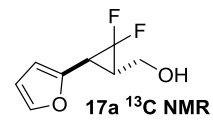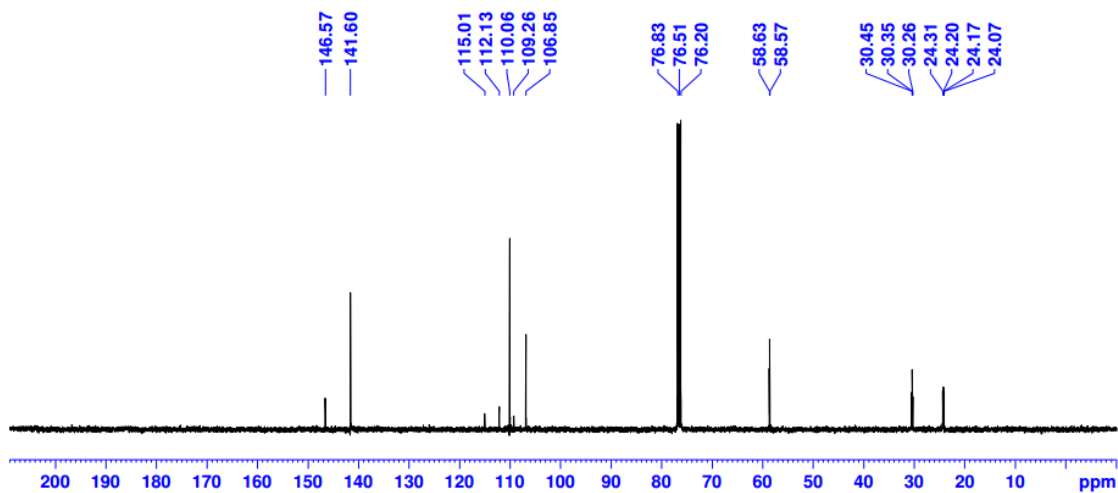

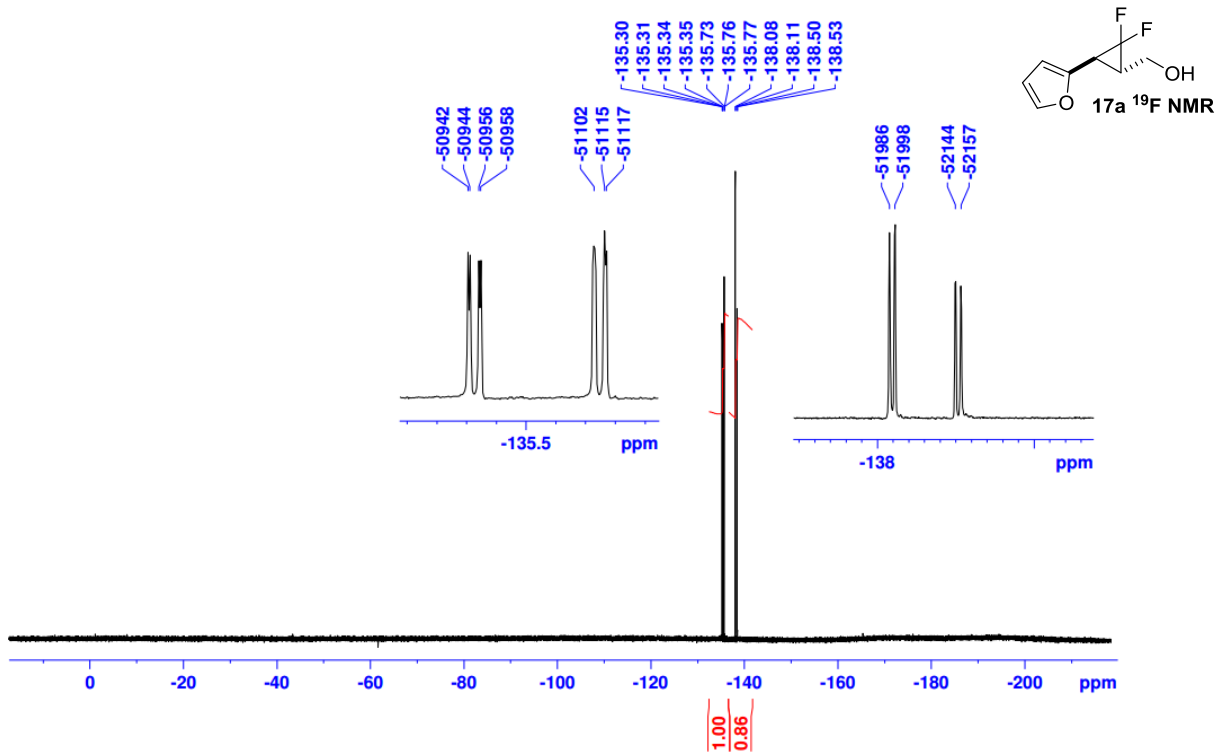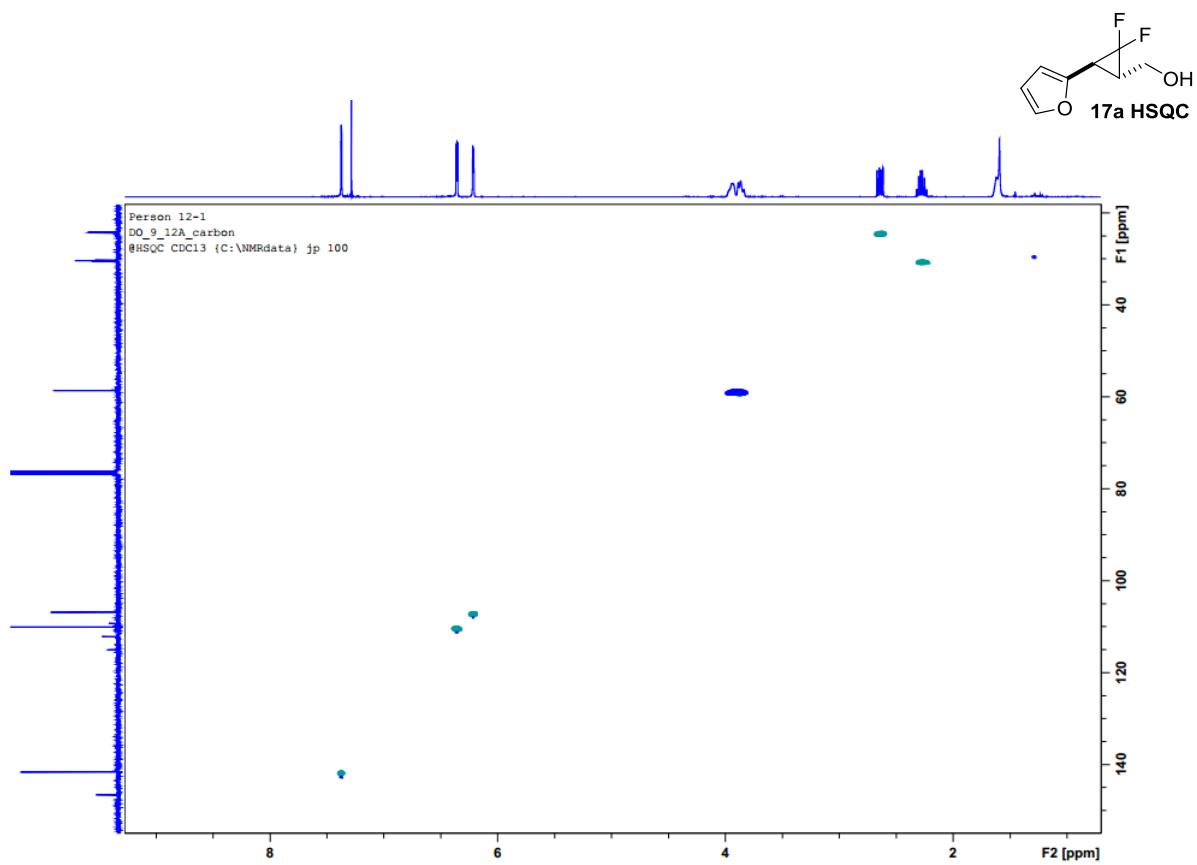

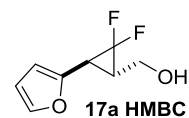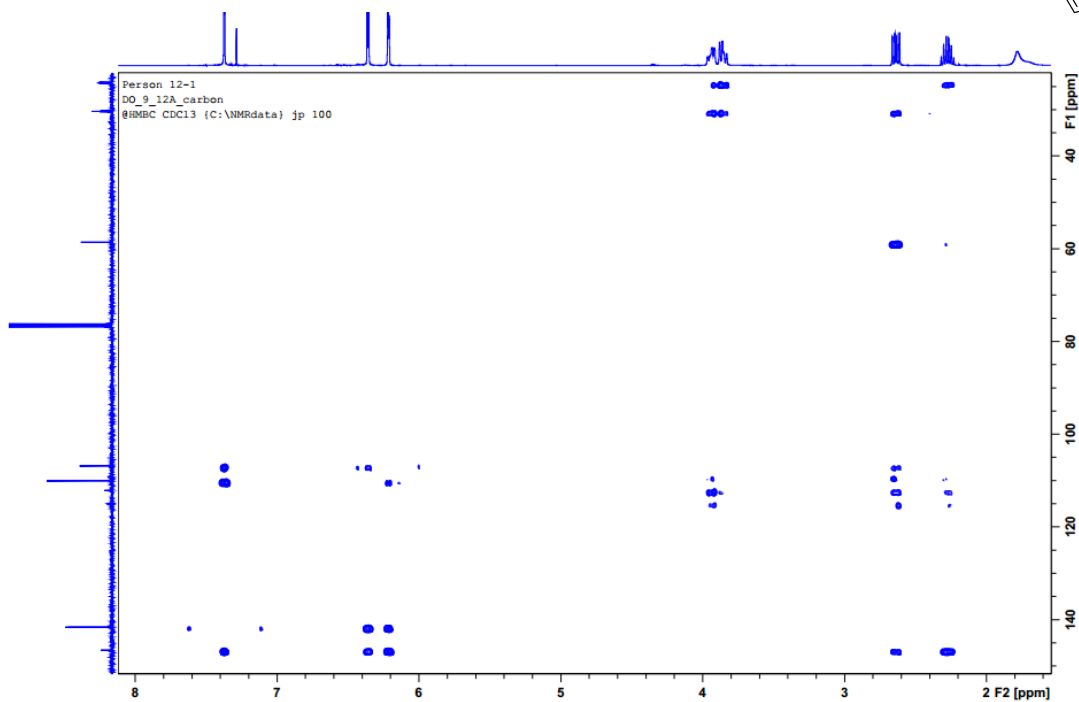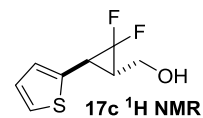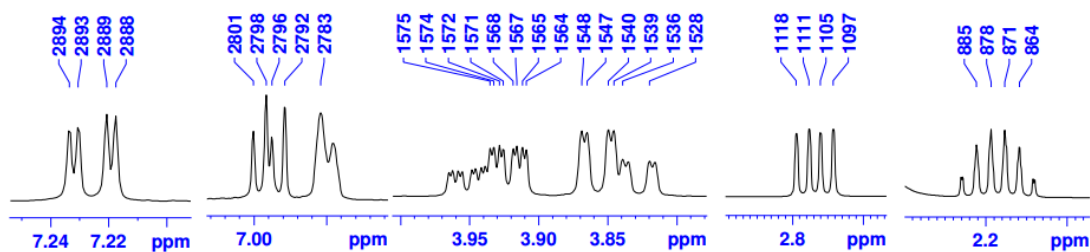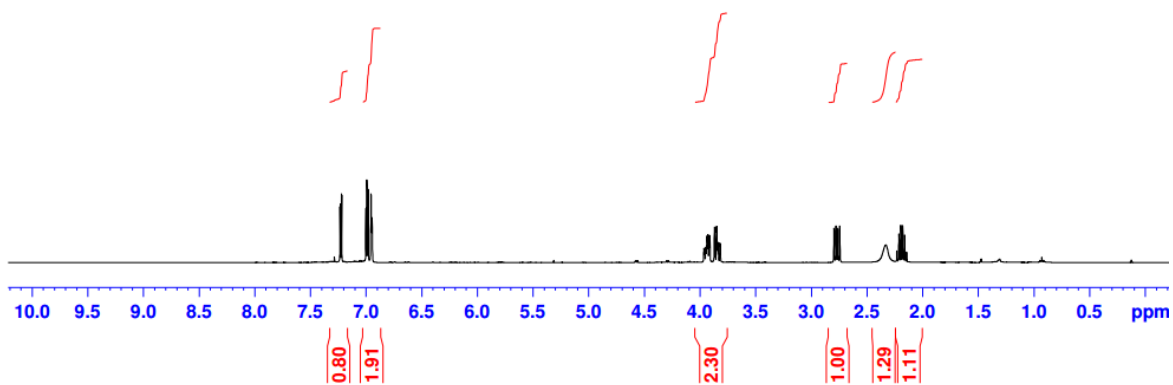

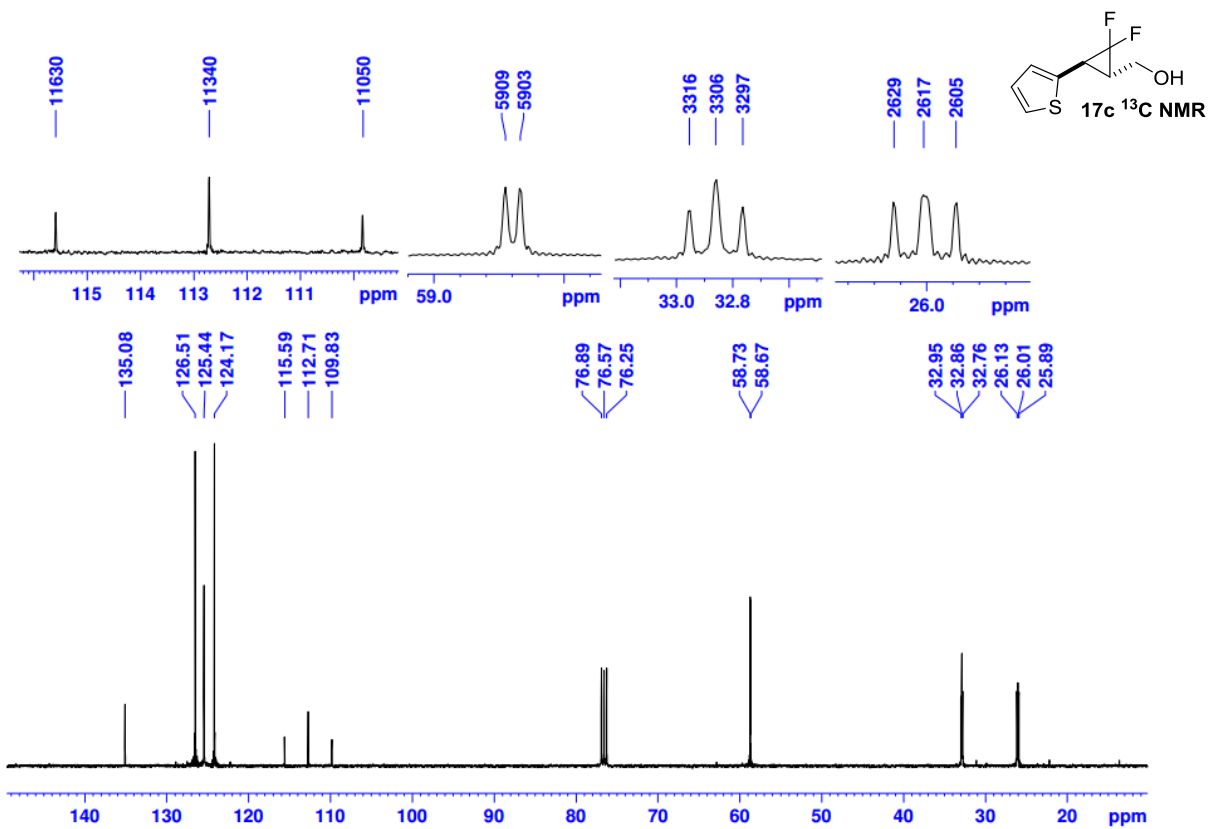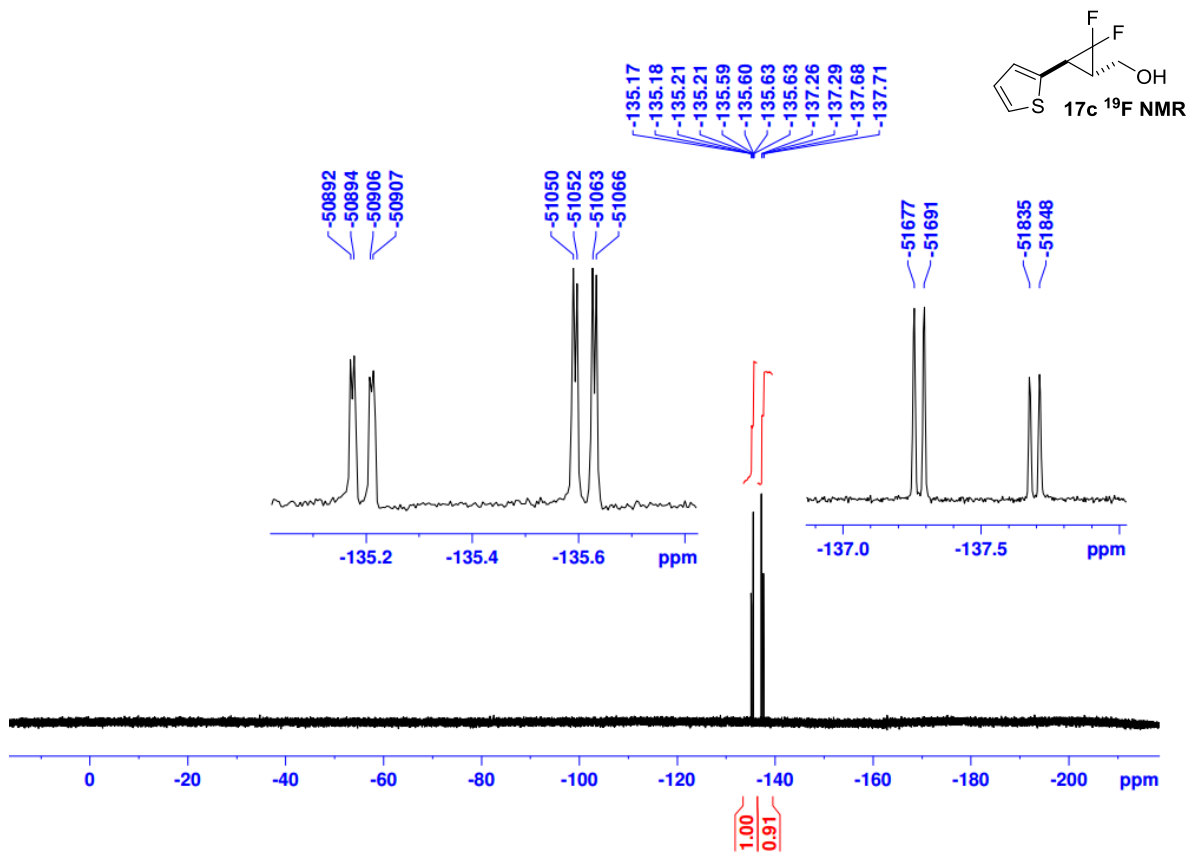



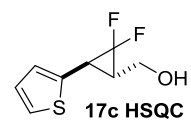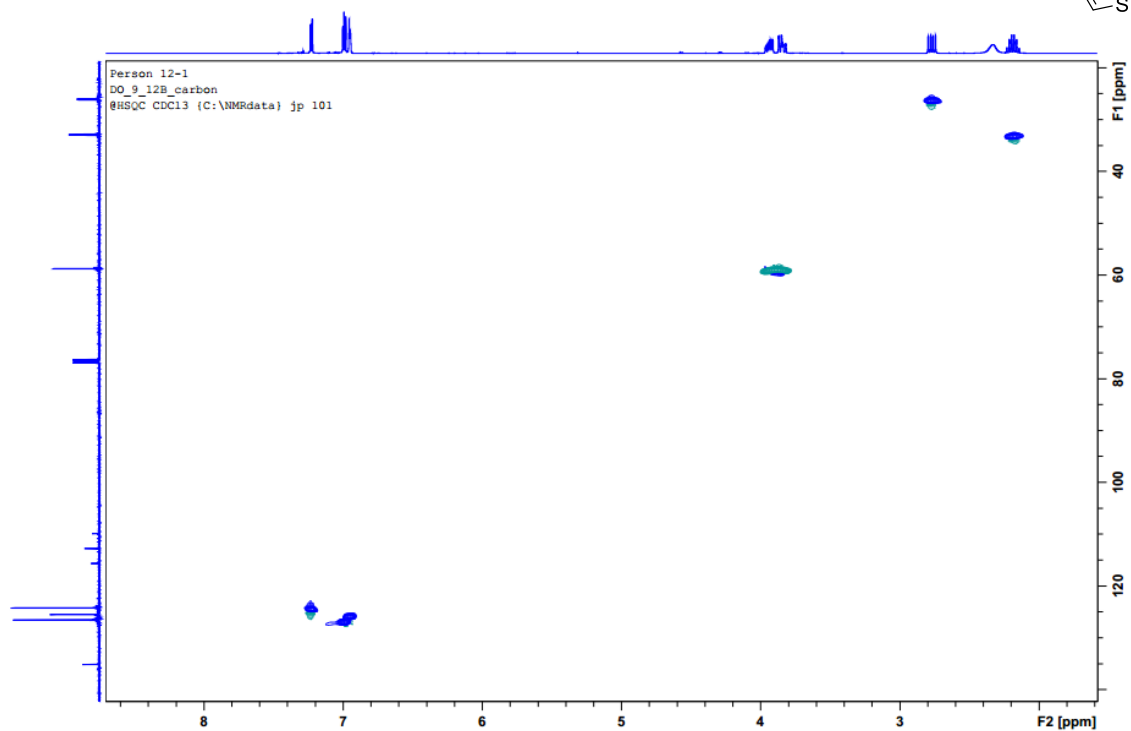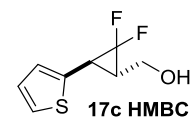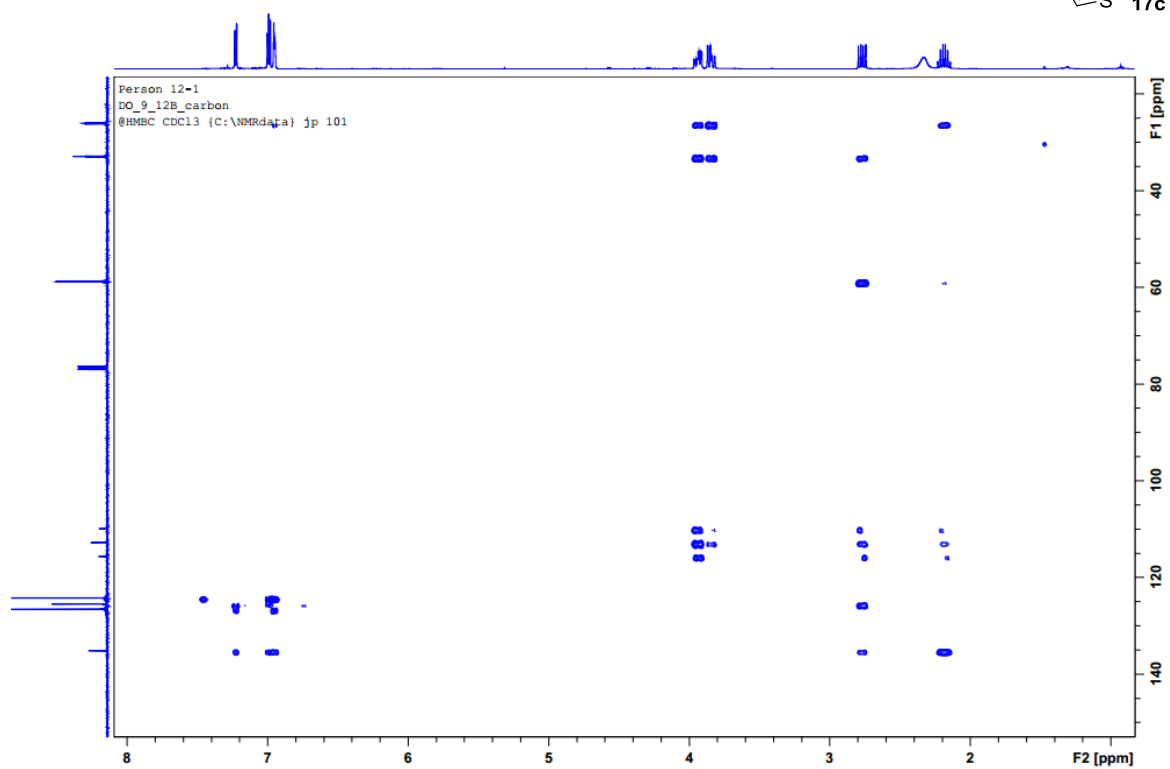

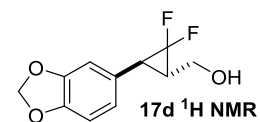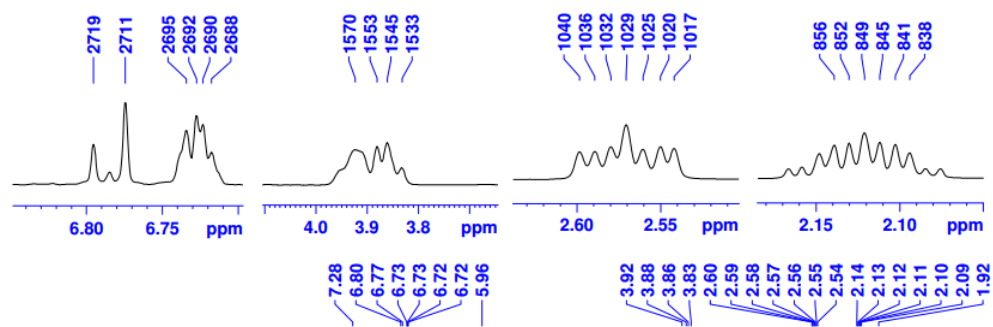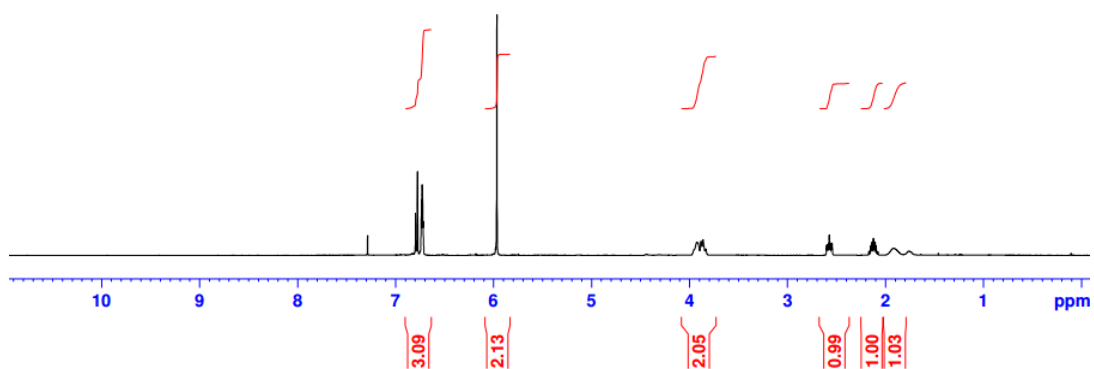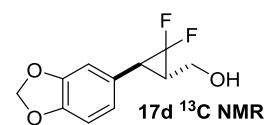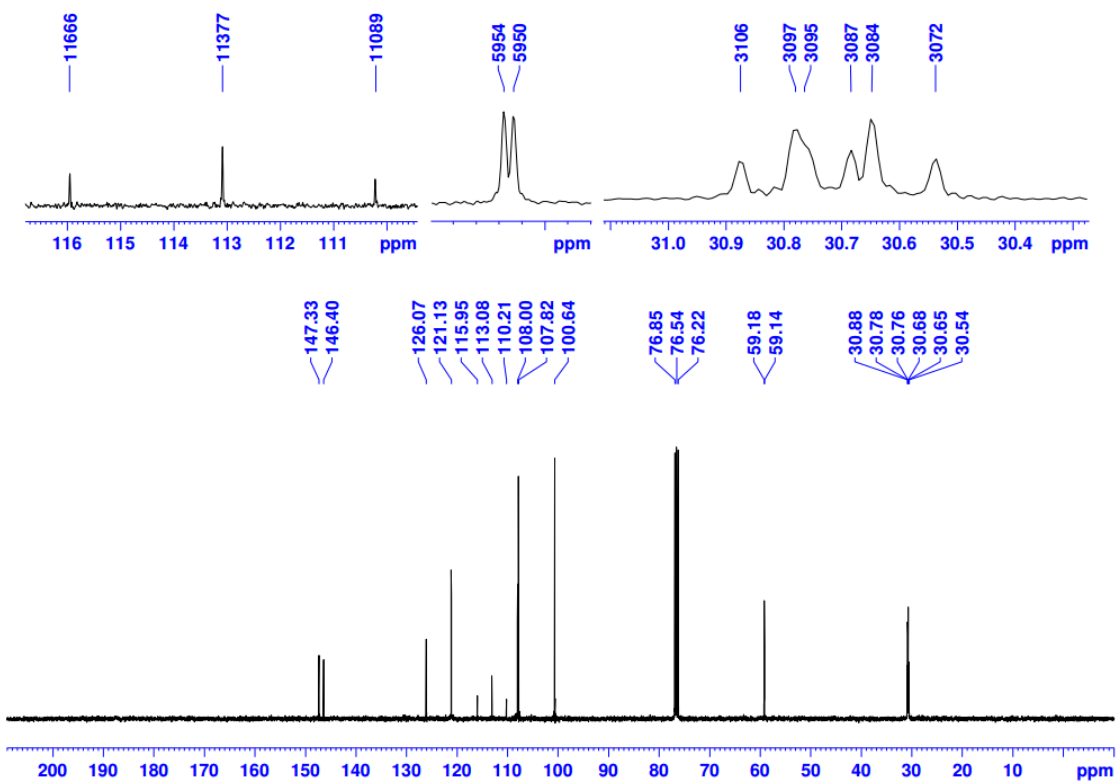

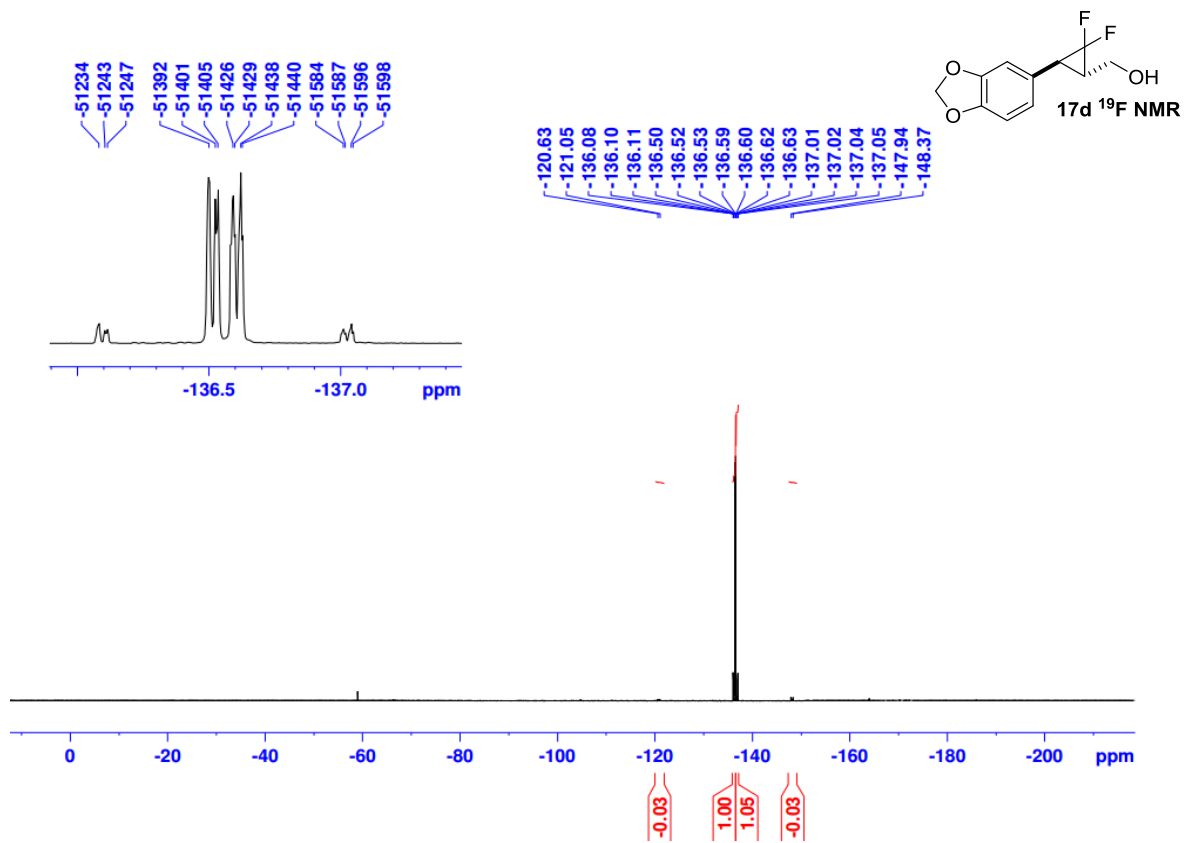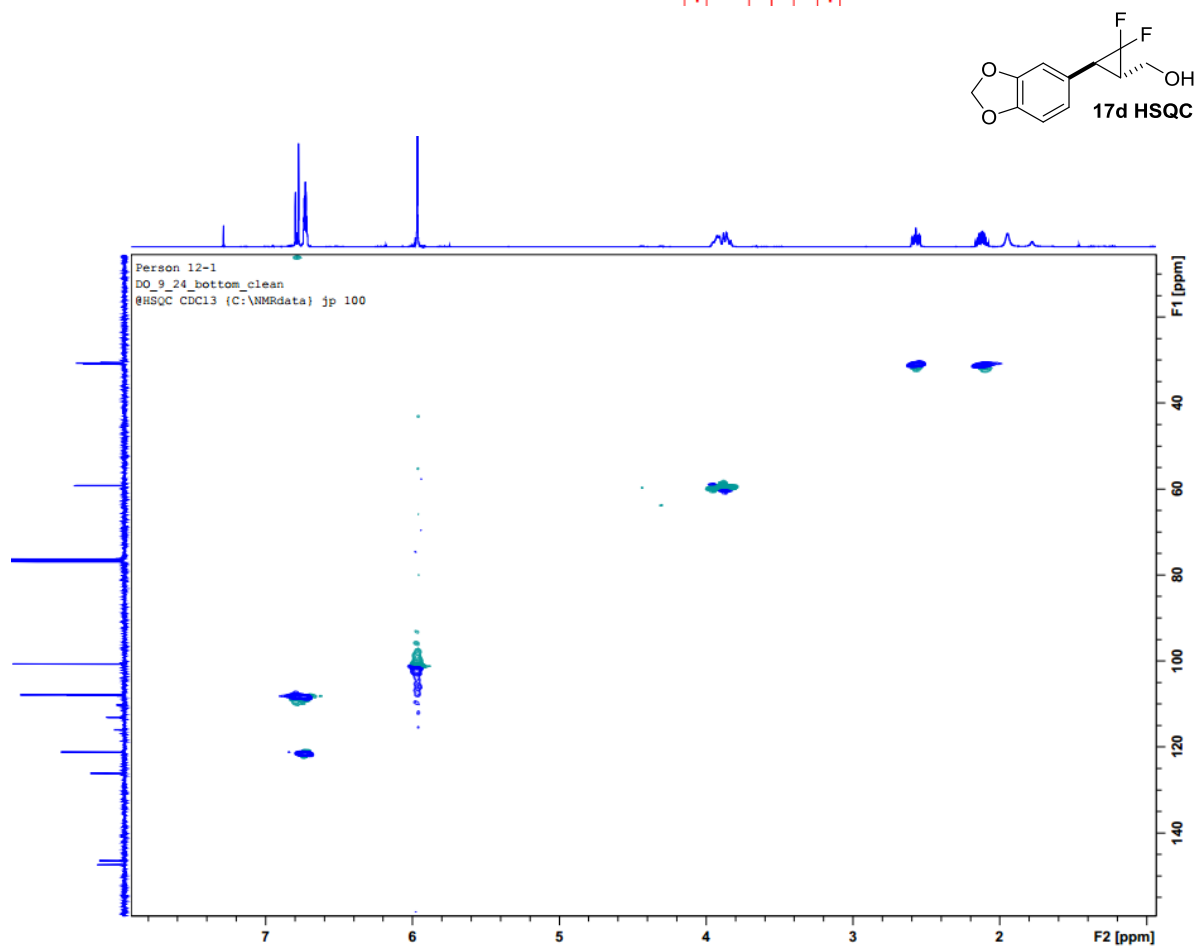

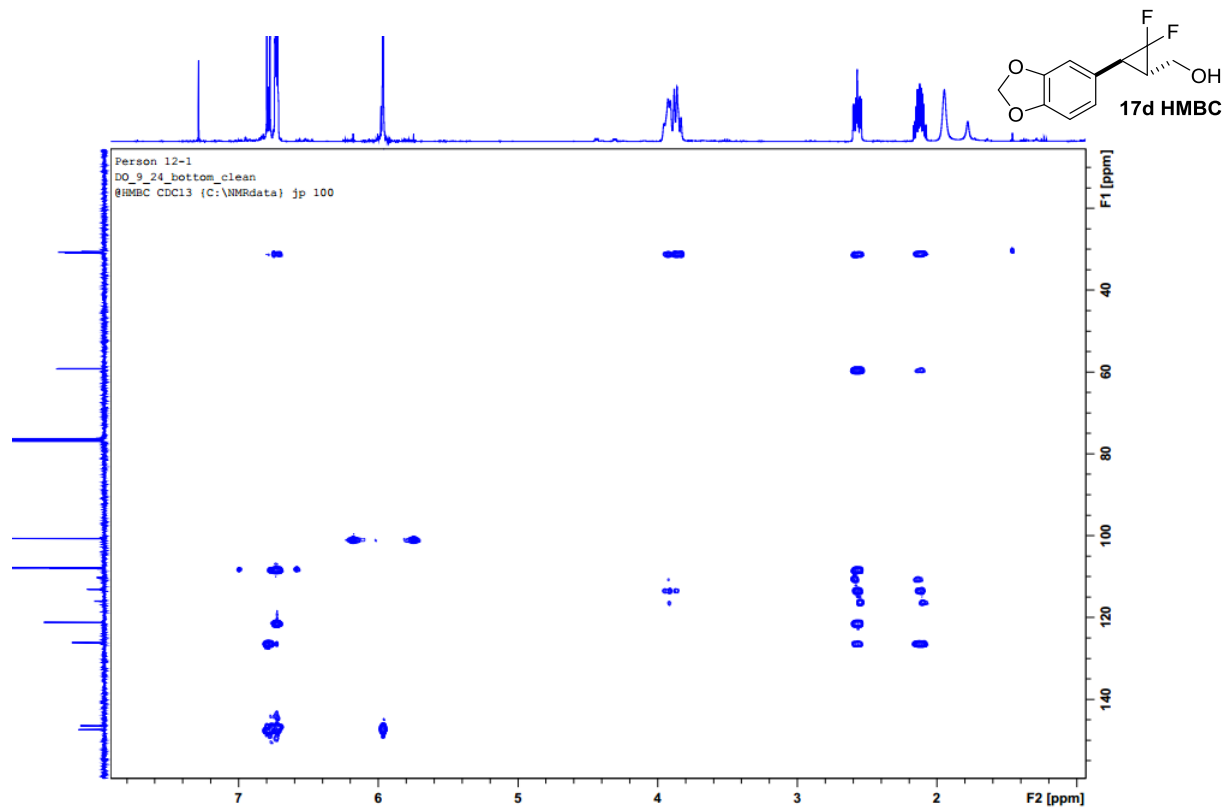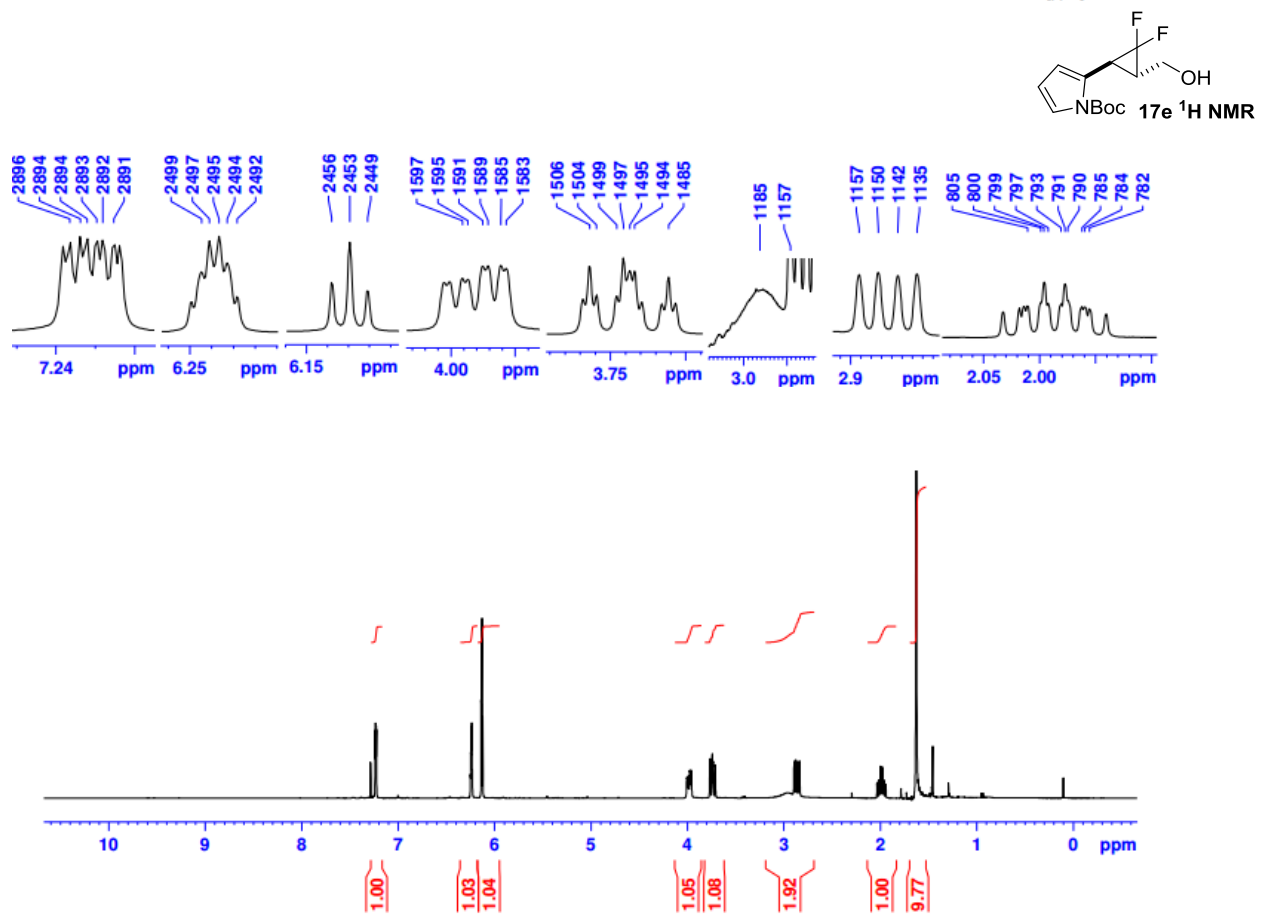

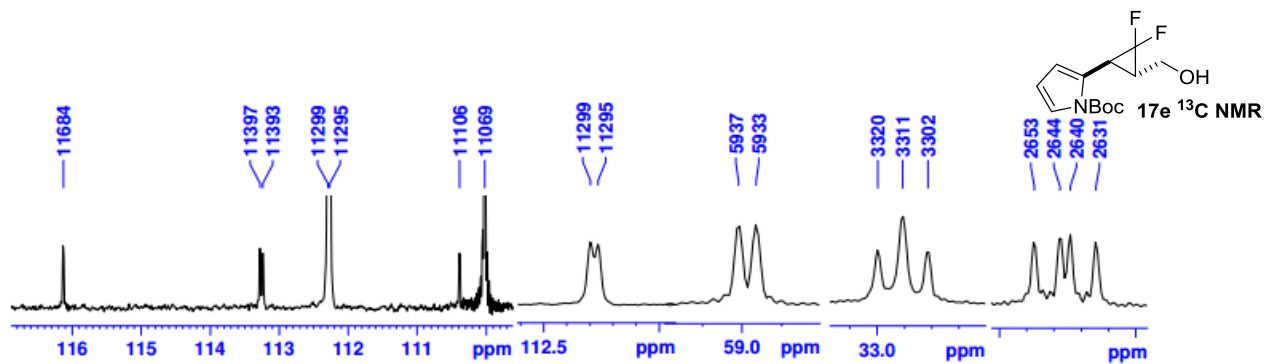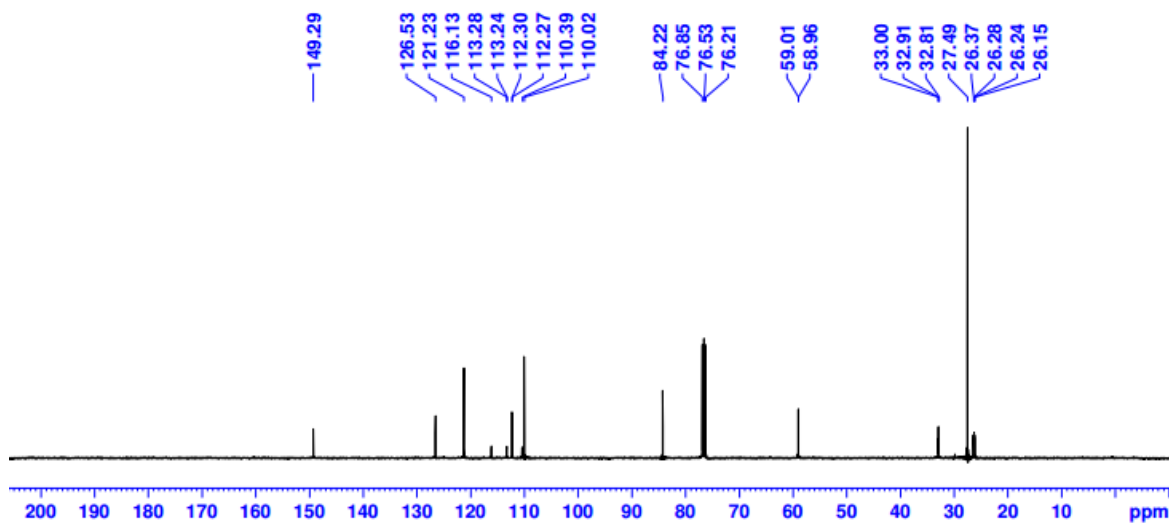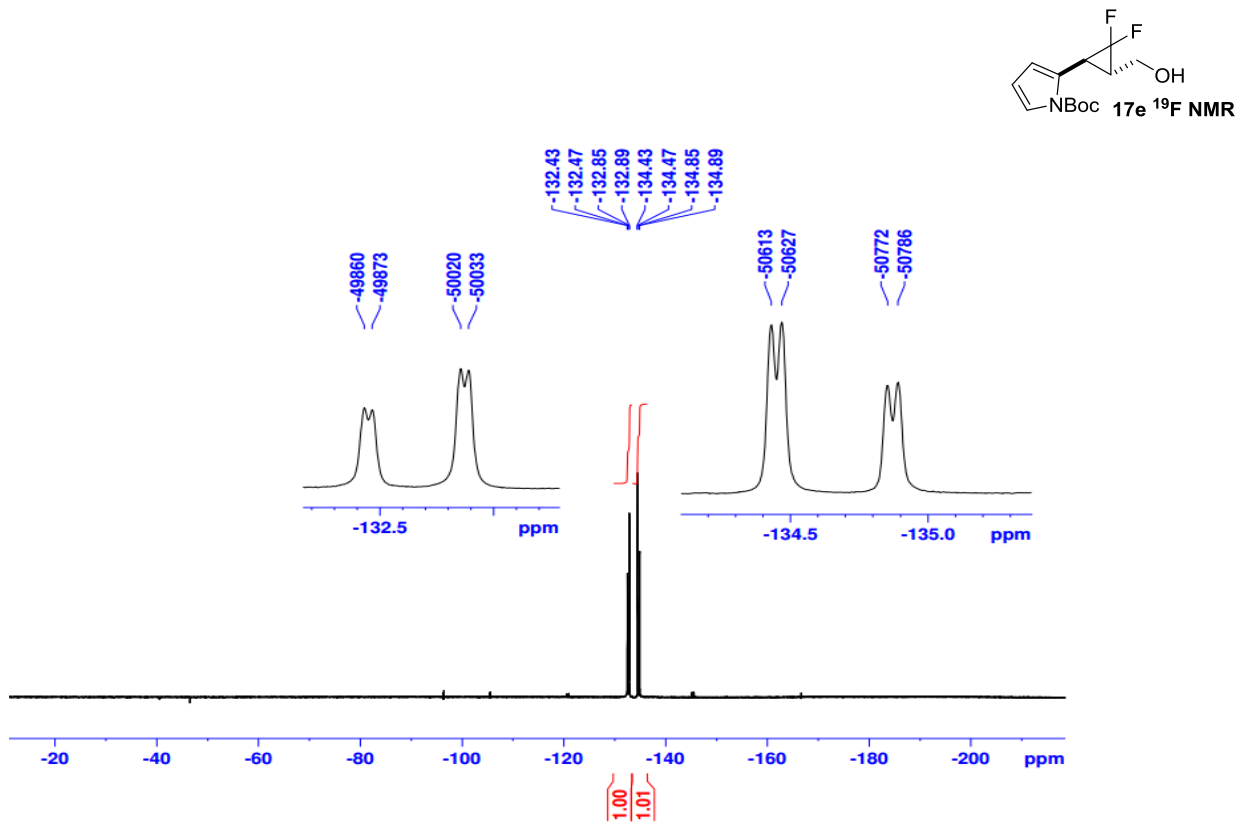

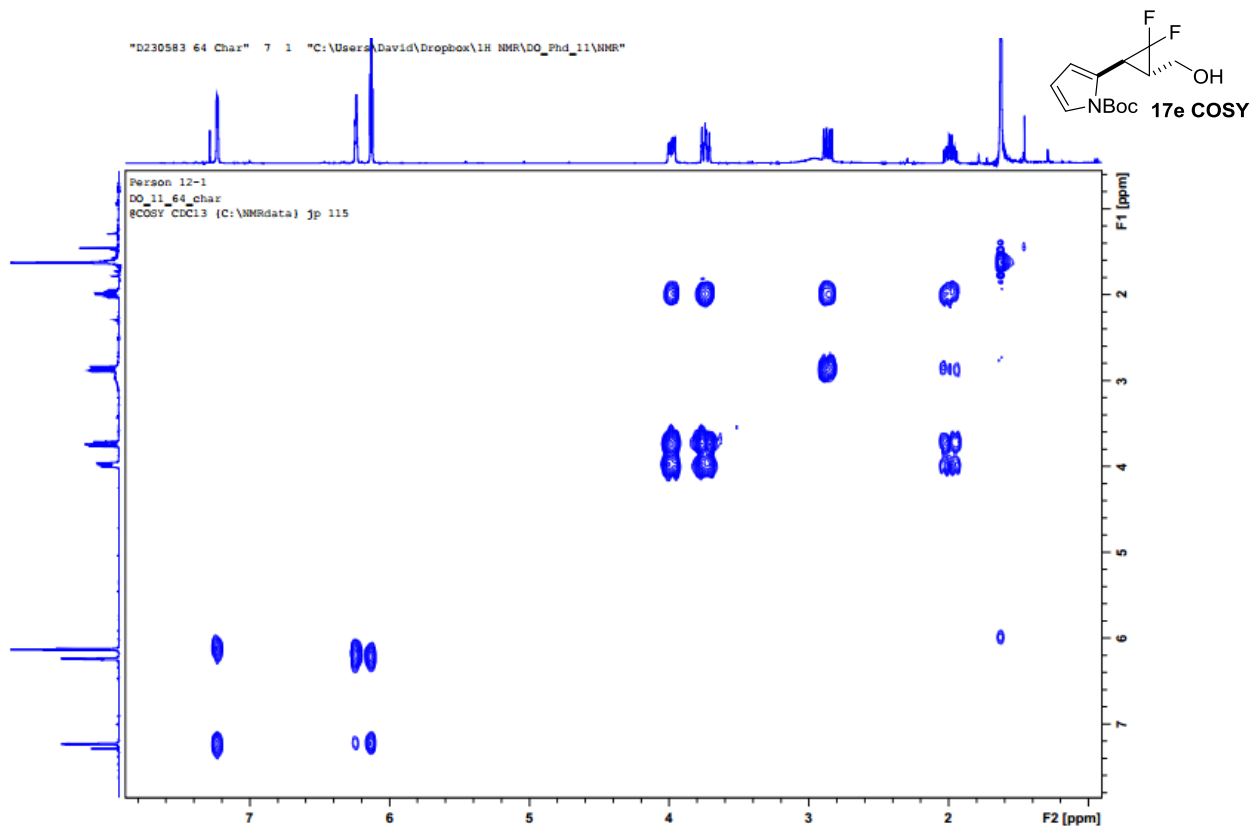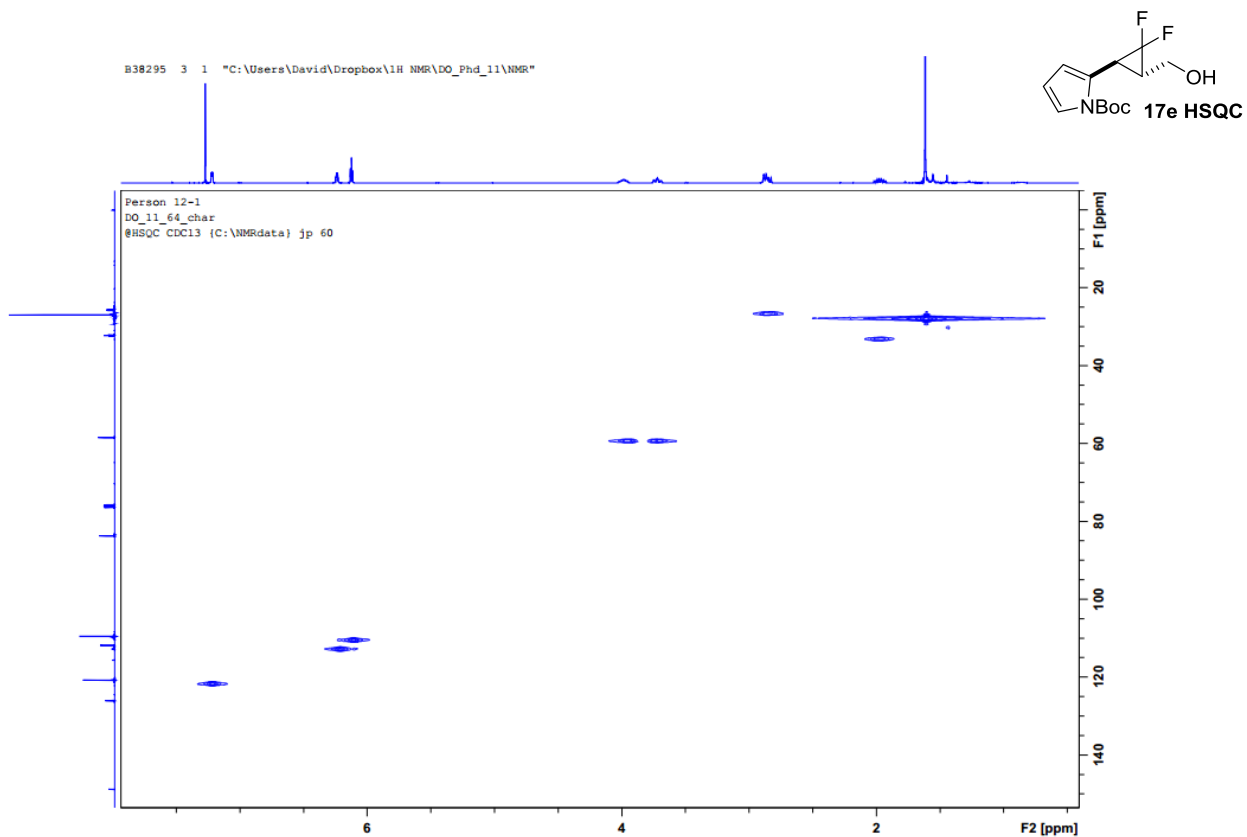

B38295 4 1 "C:\Users\David\Dropbox\1H NMR\DO\_PhD\_11\NMR"

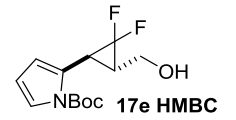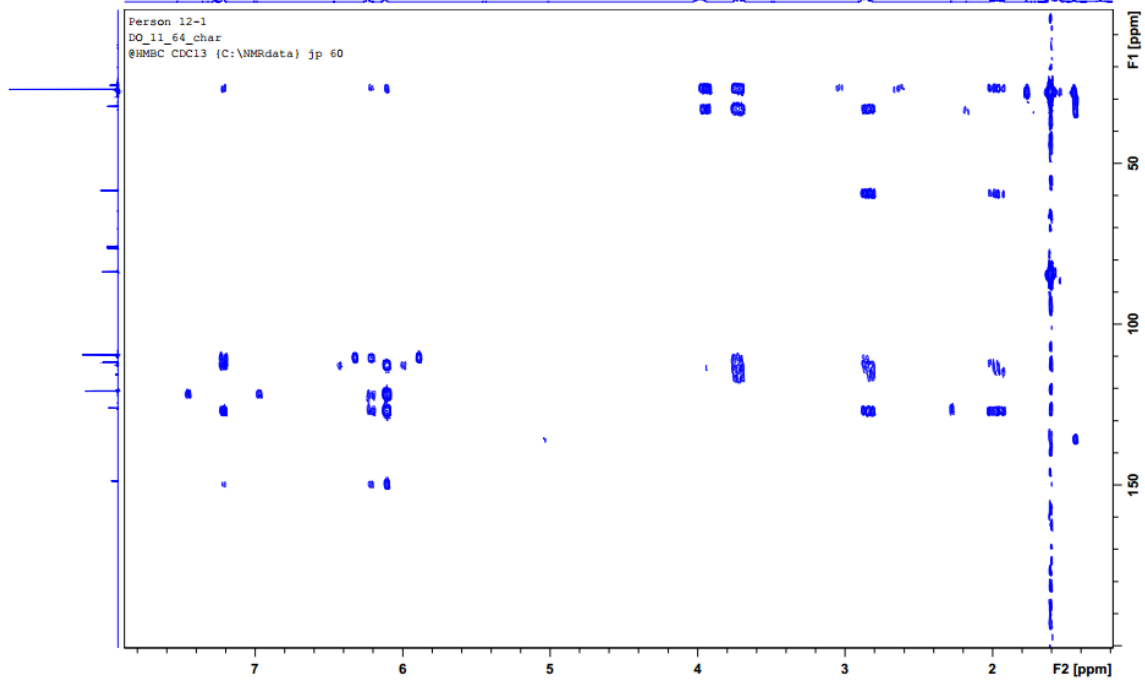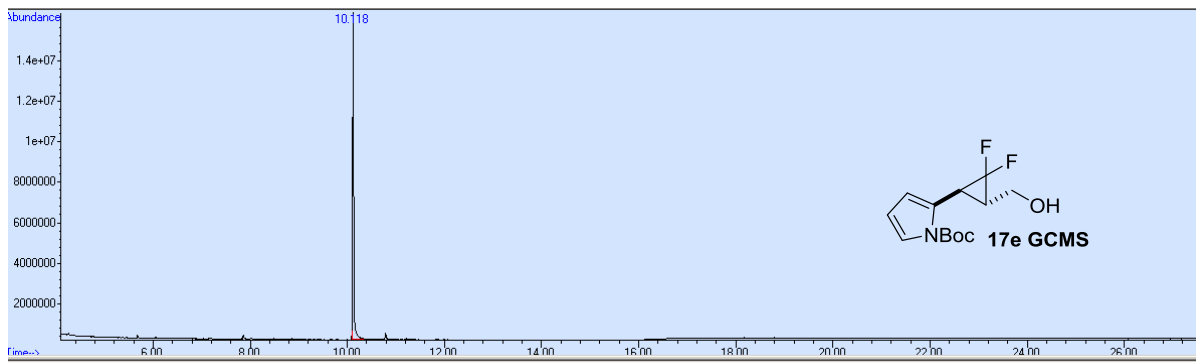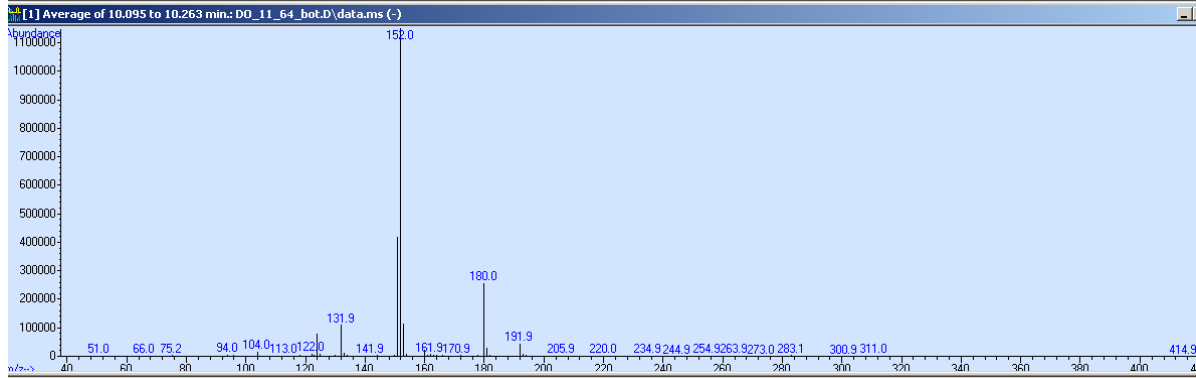

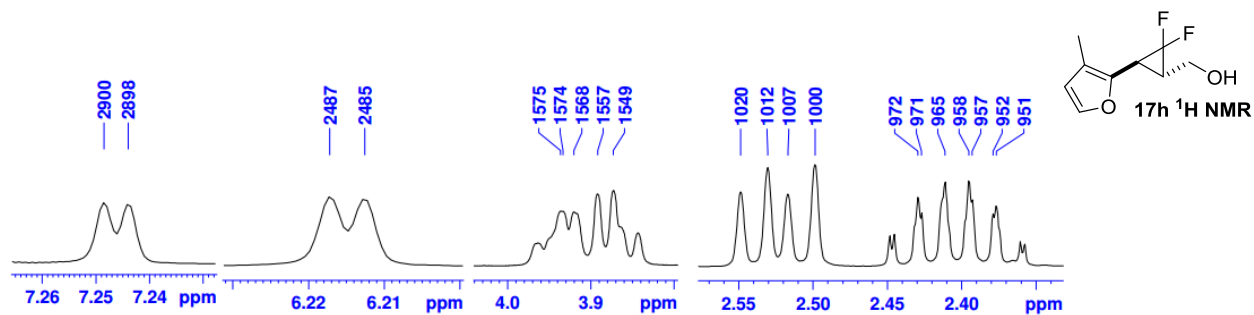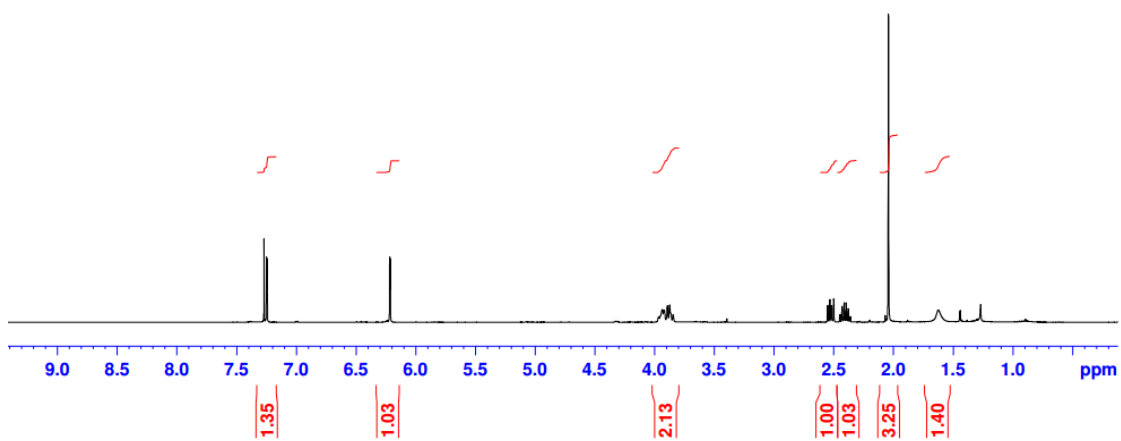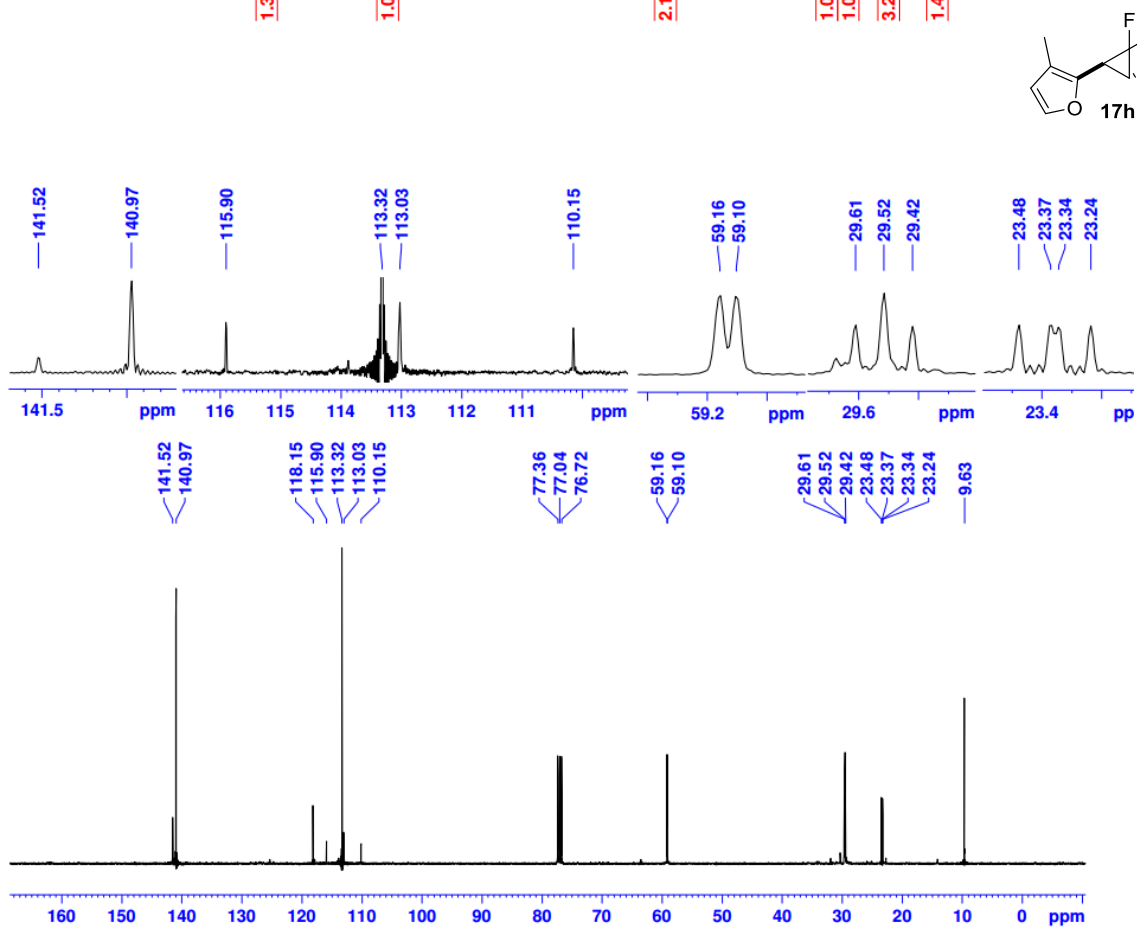



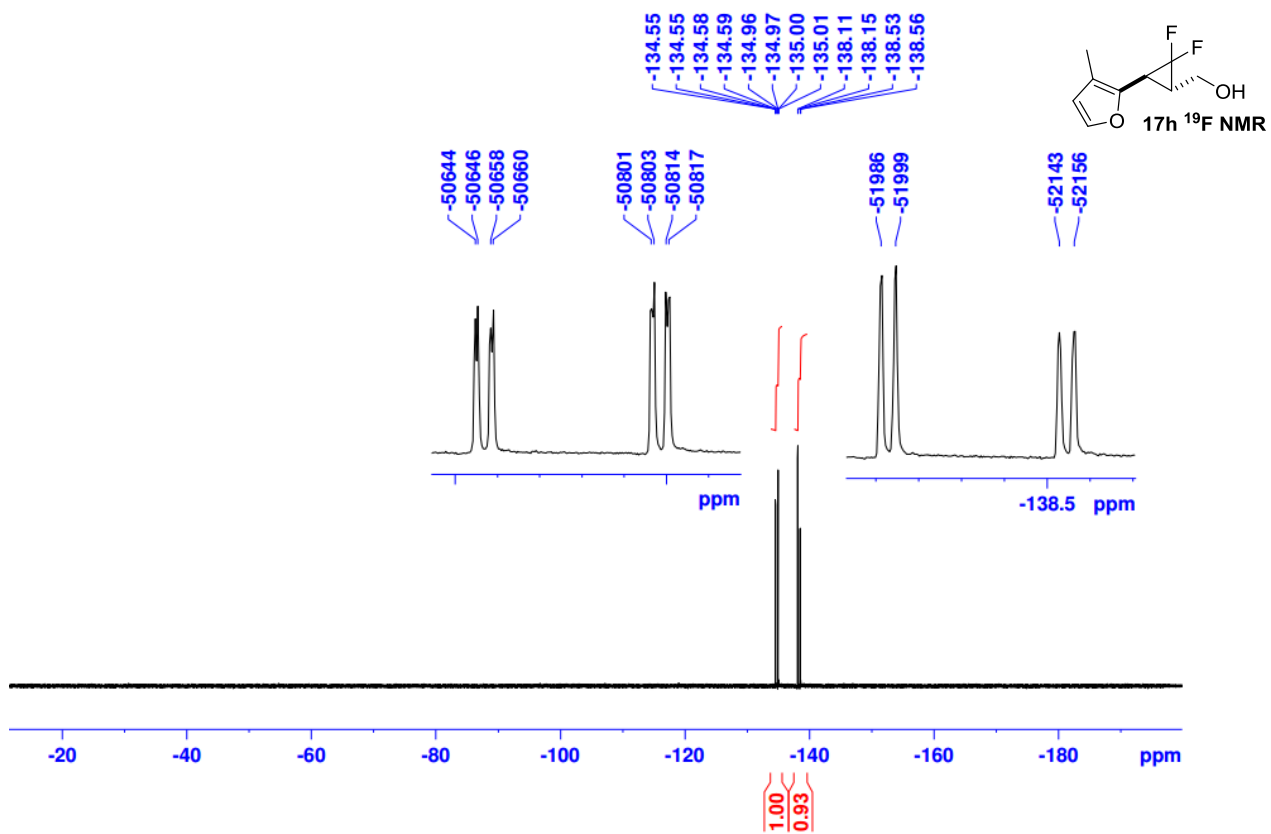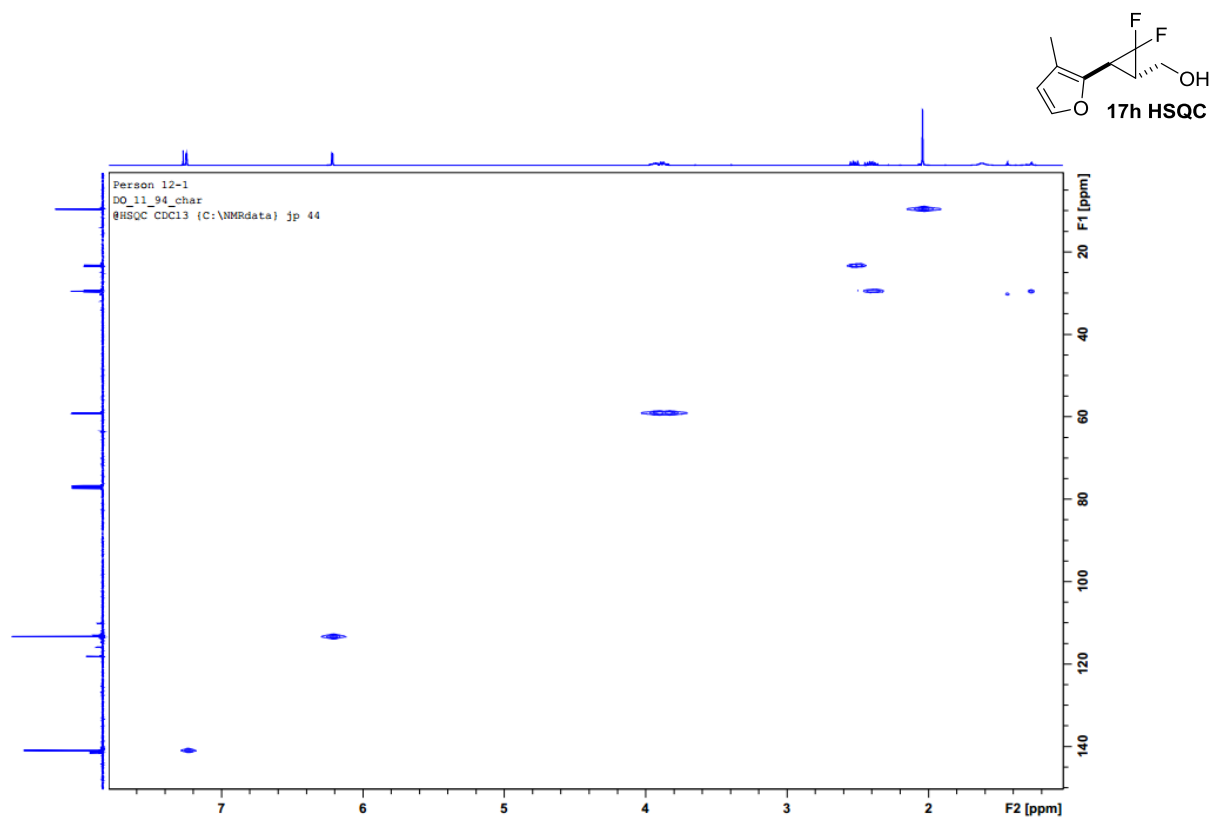

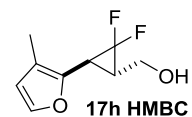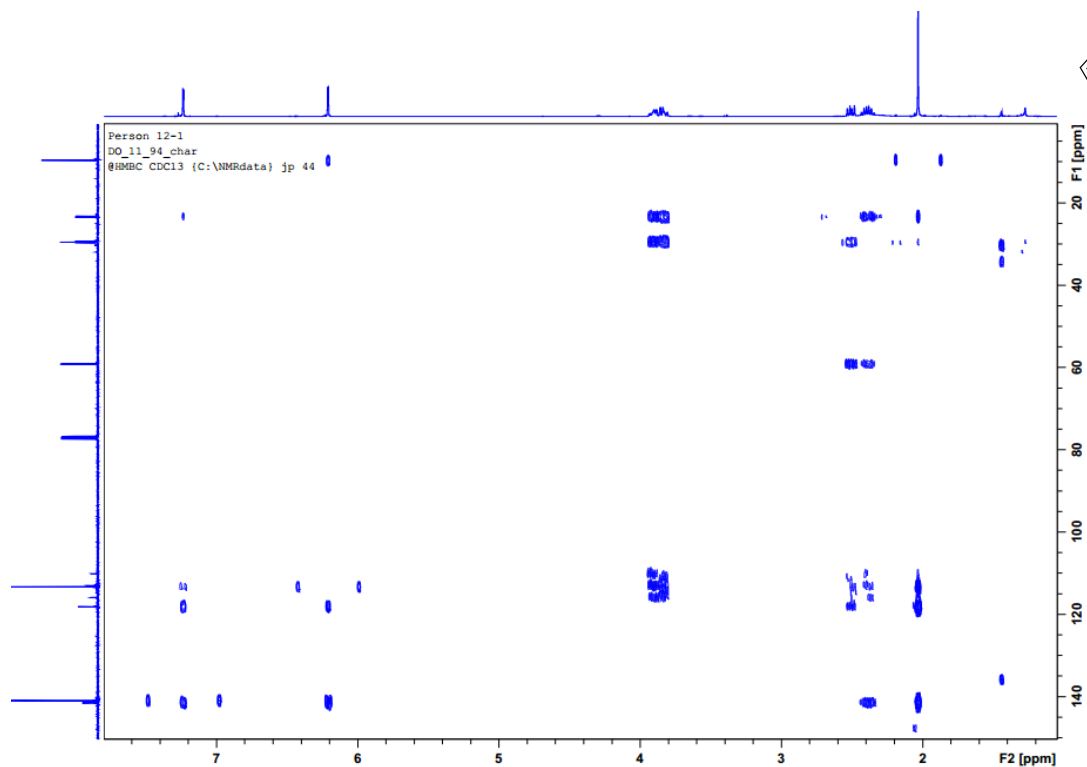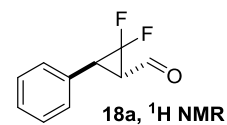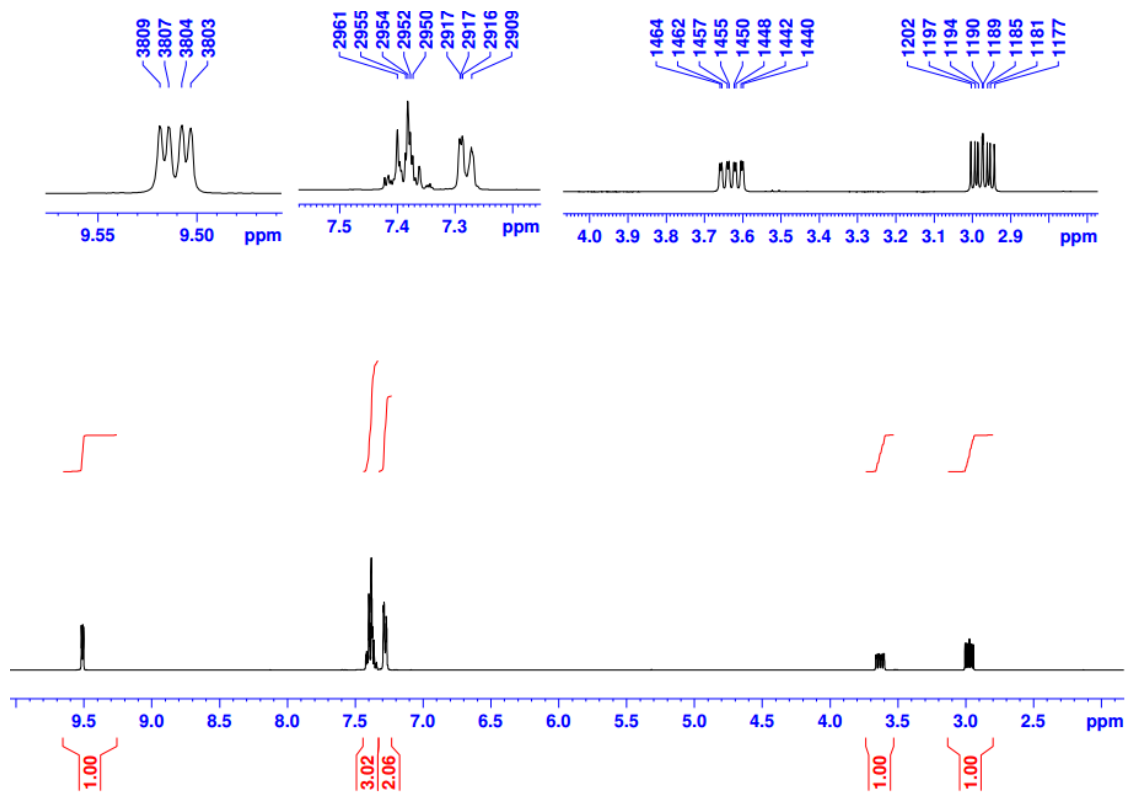

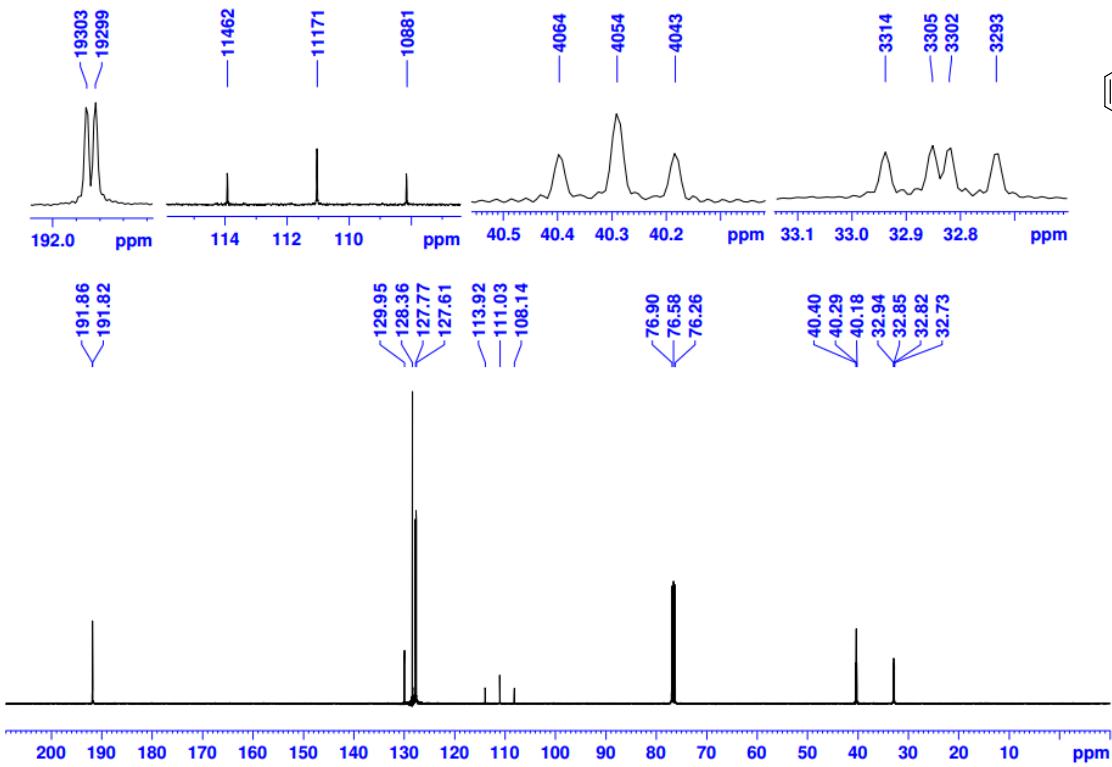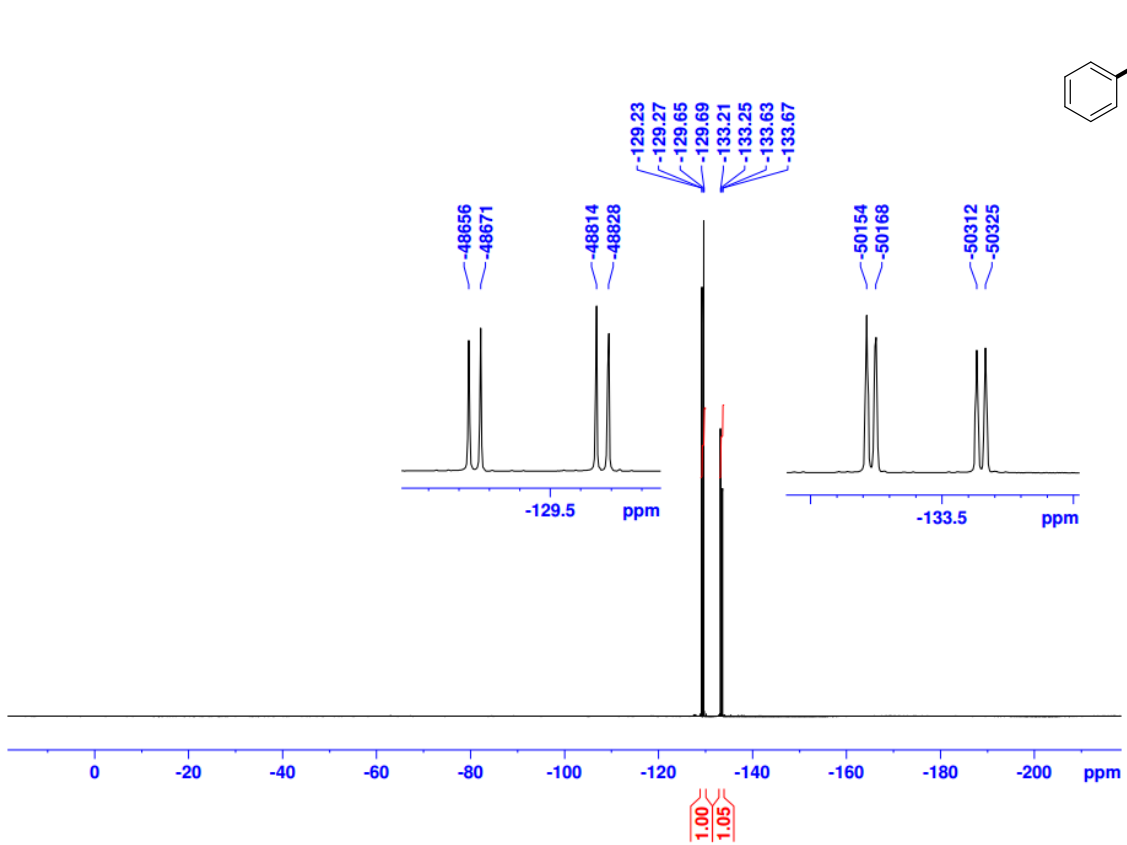

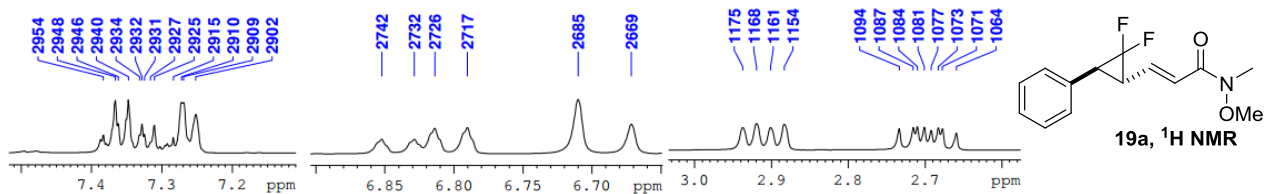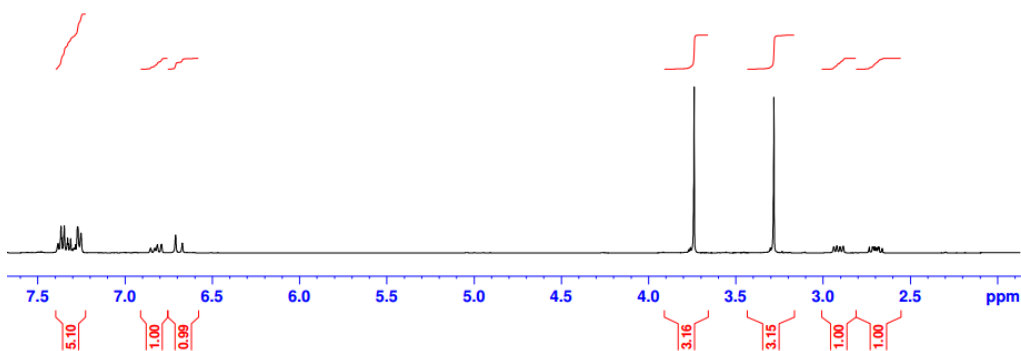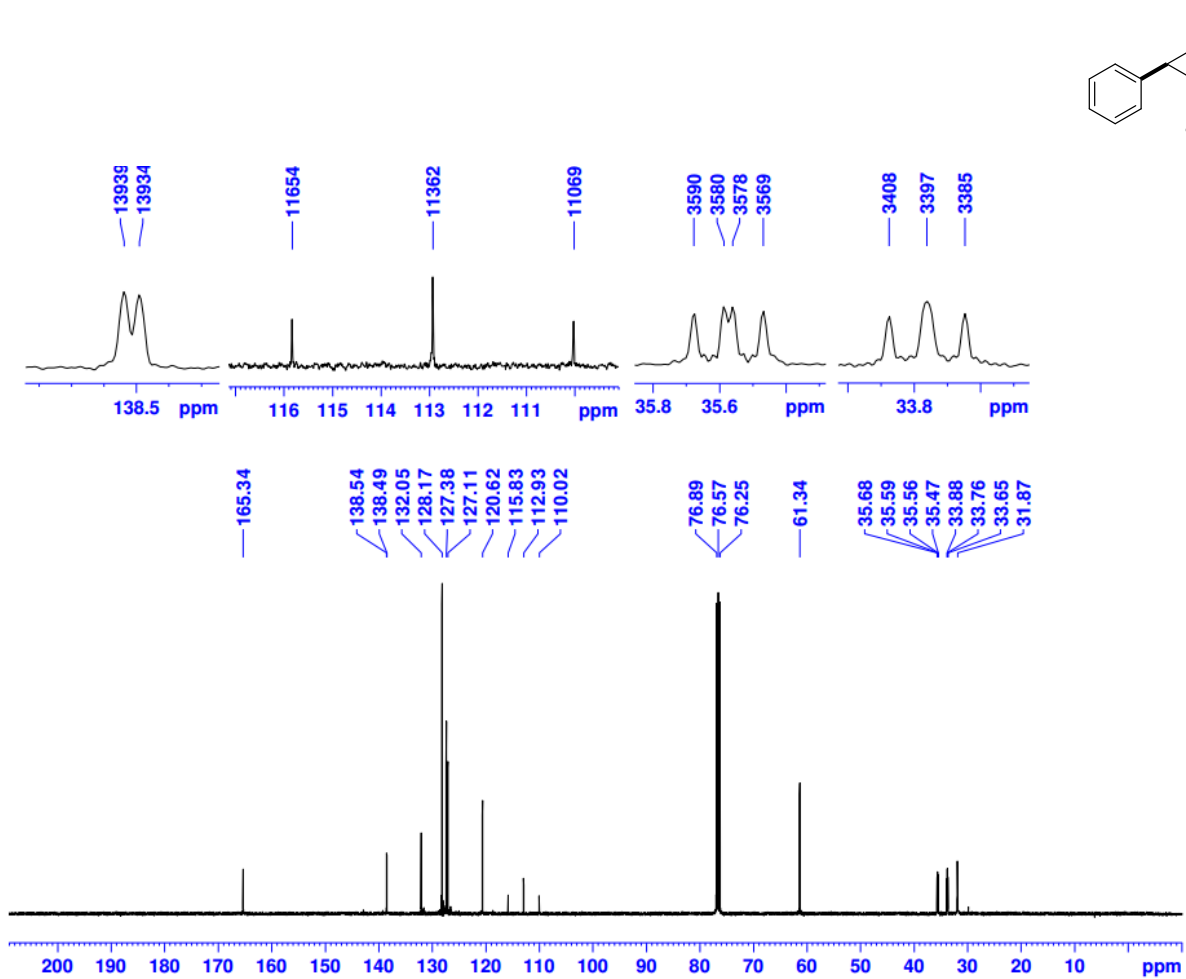

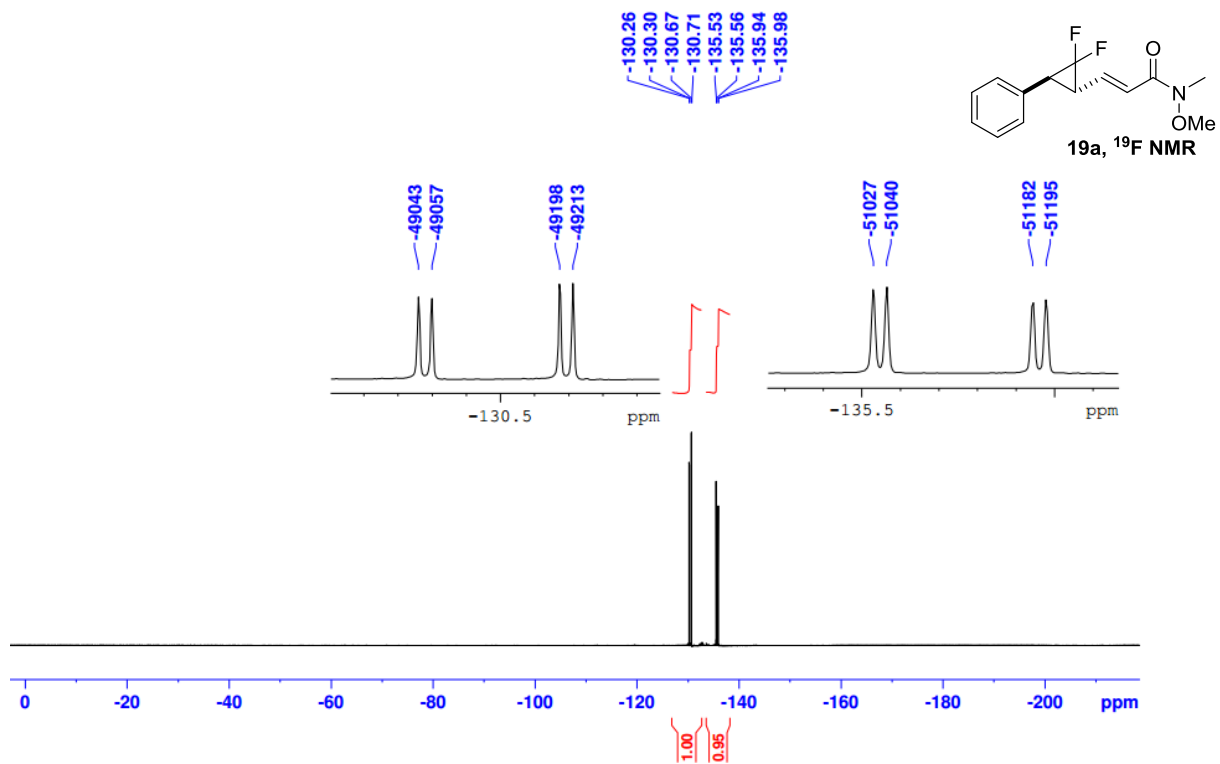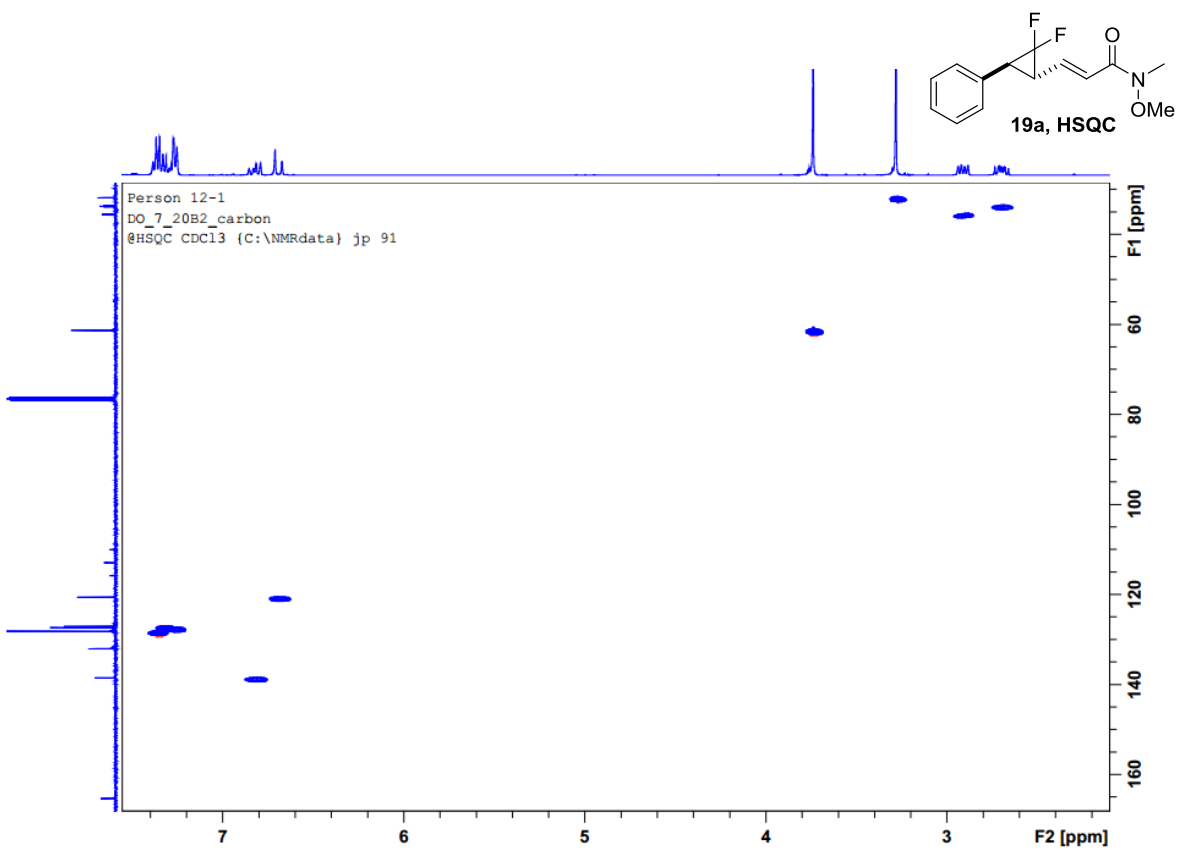

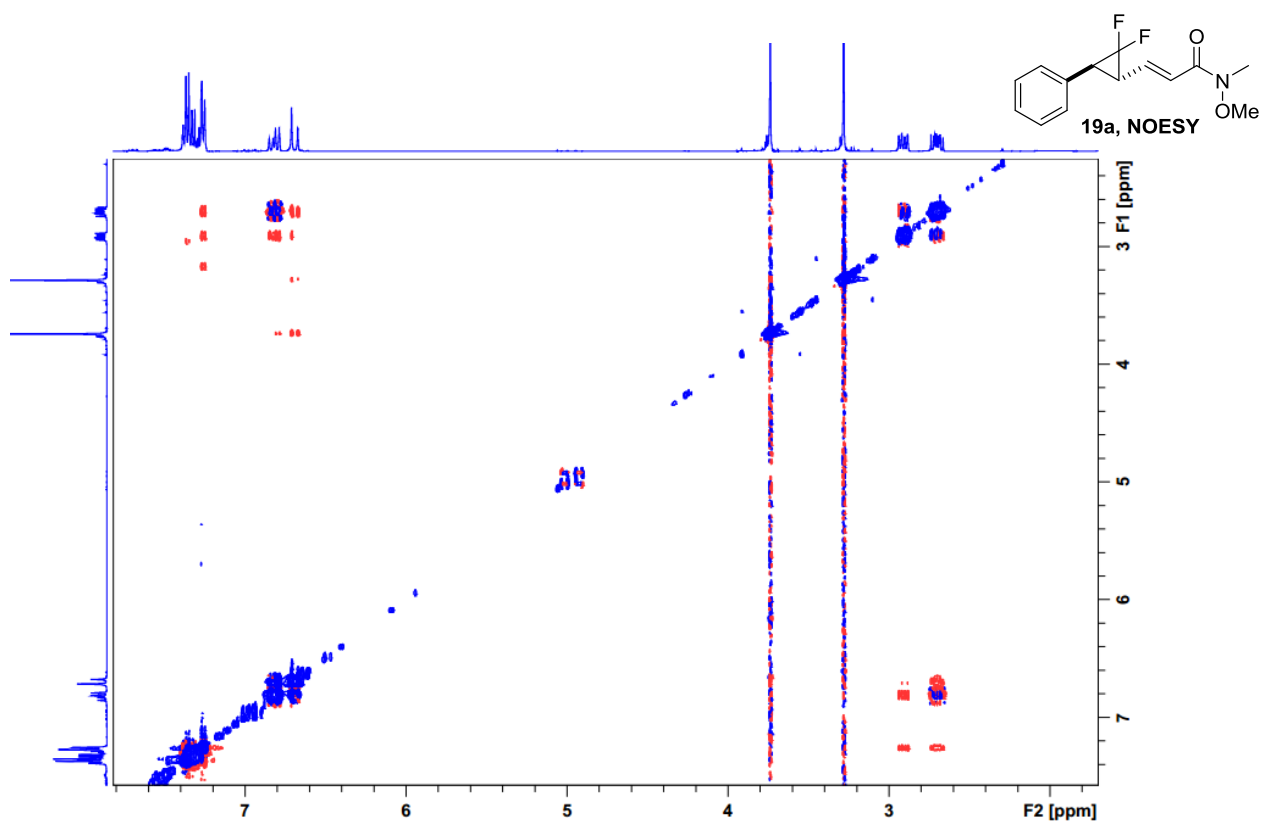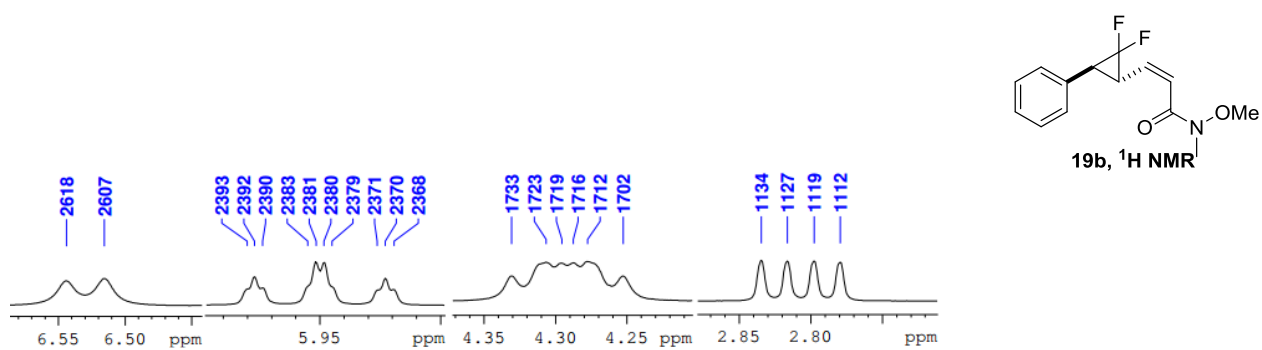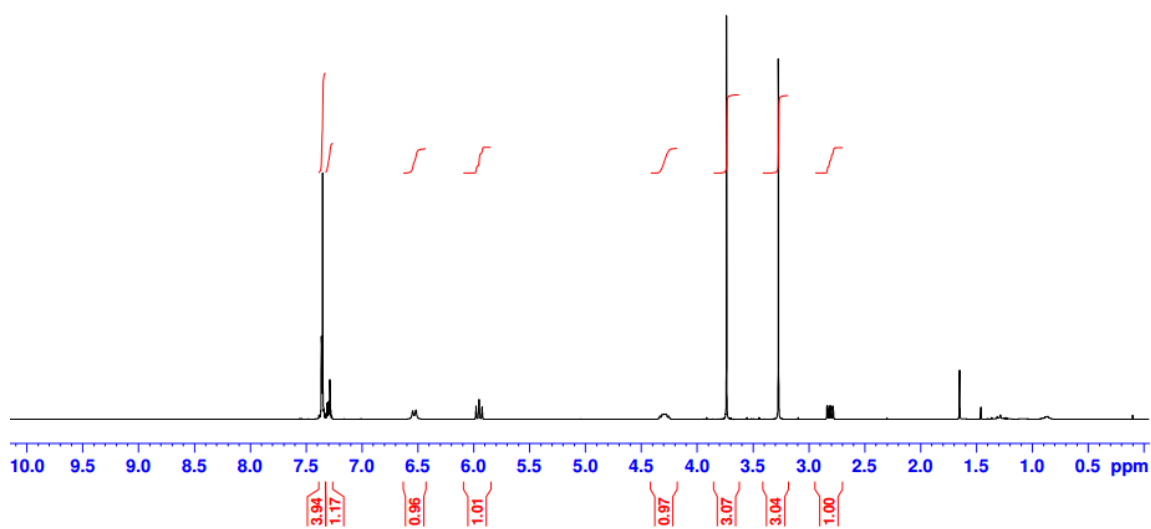

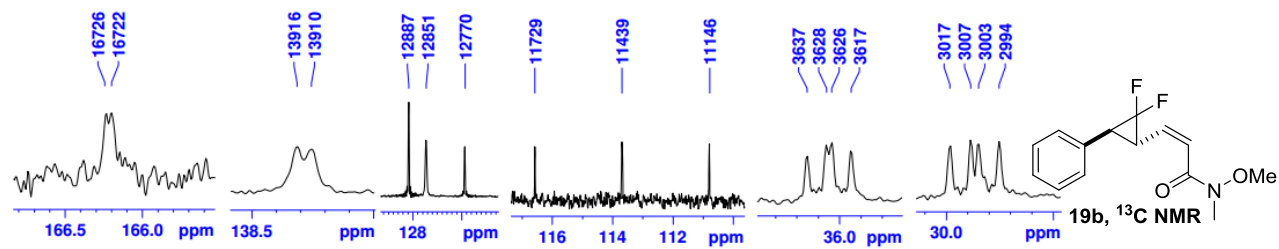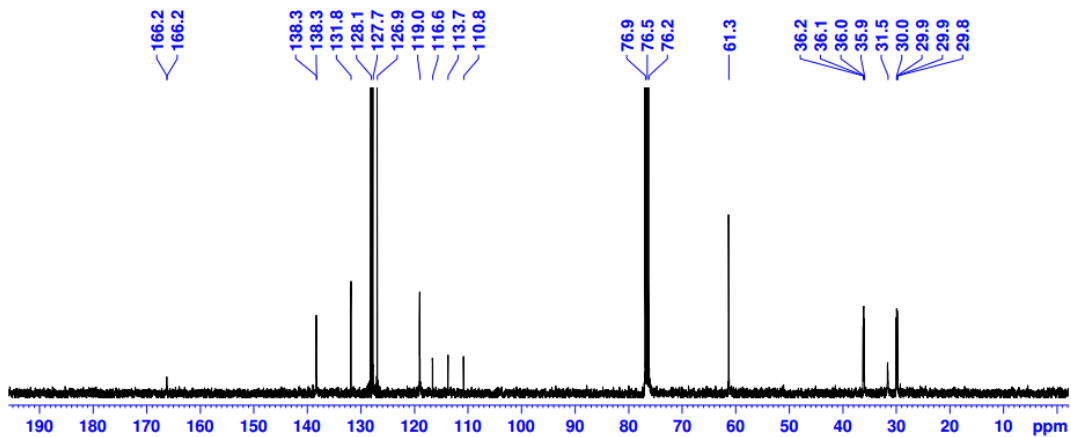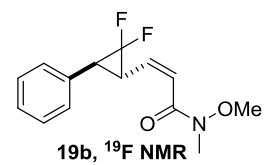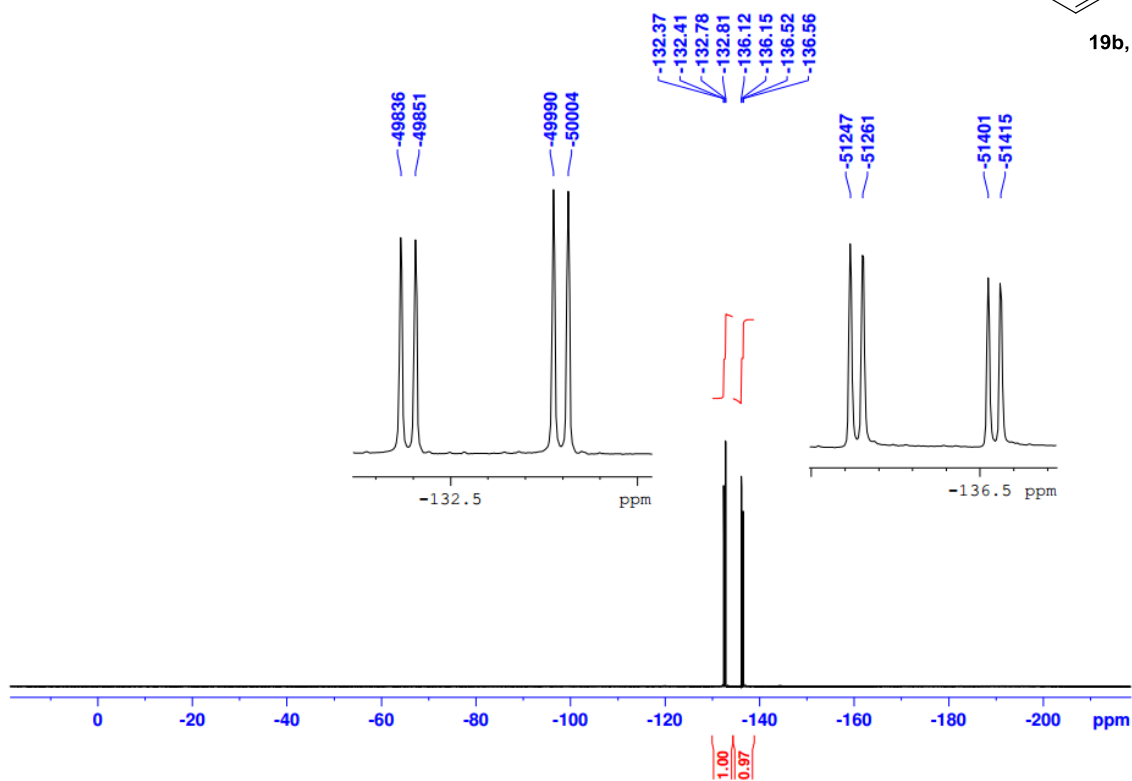

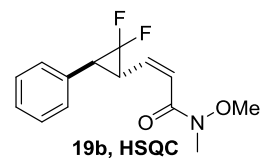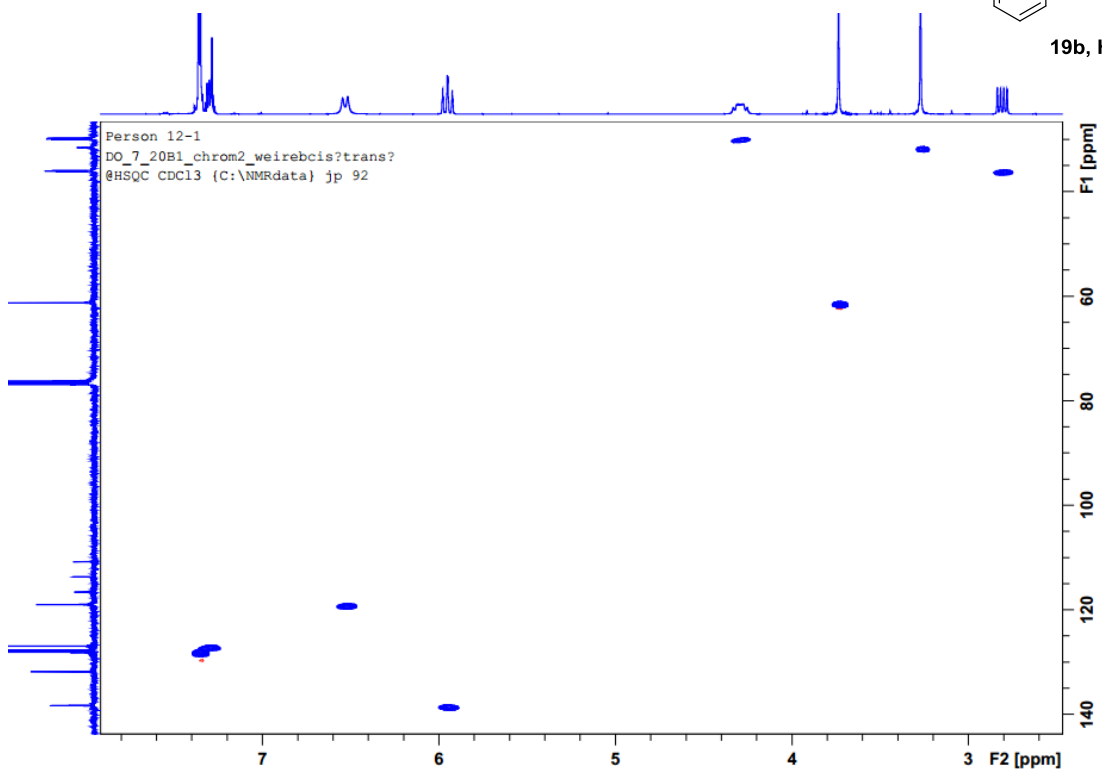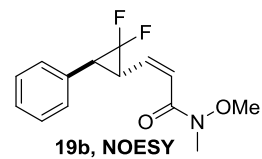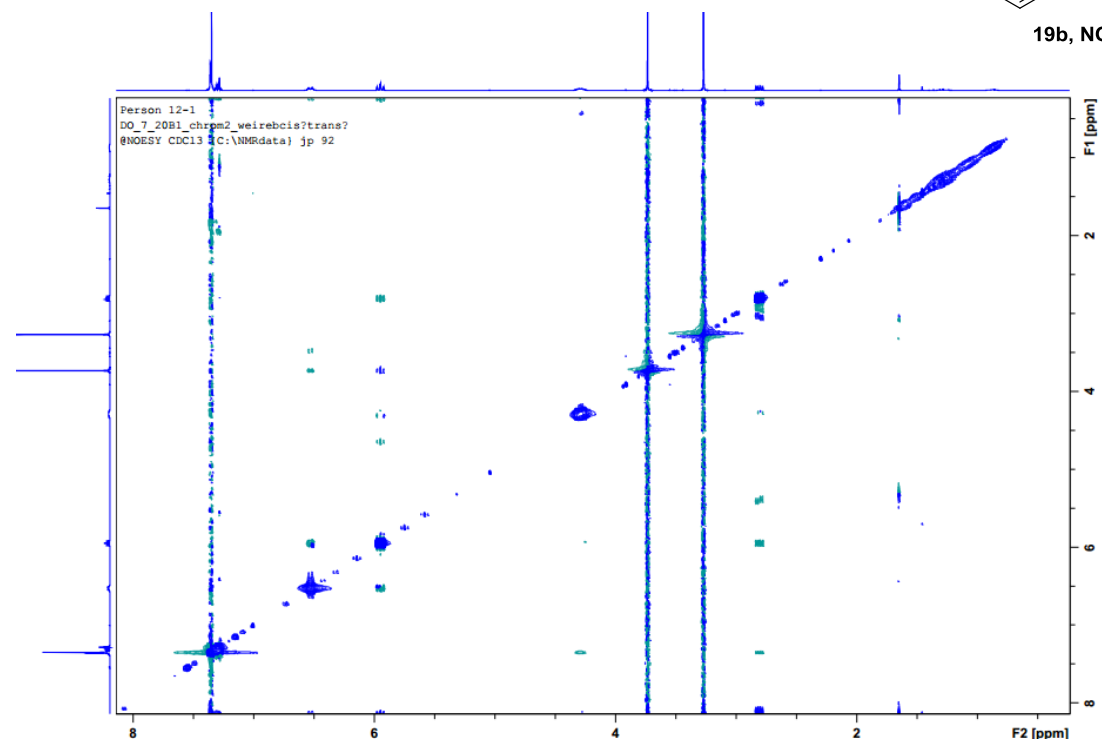



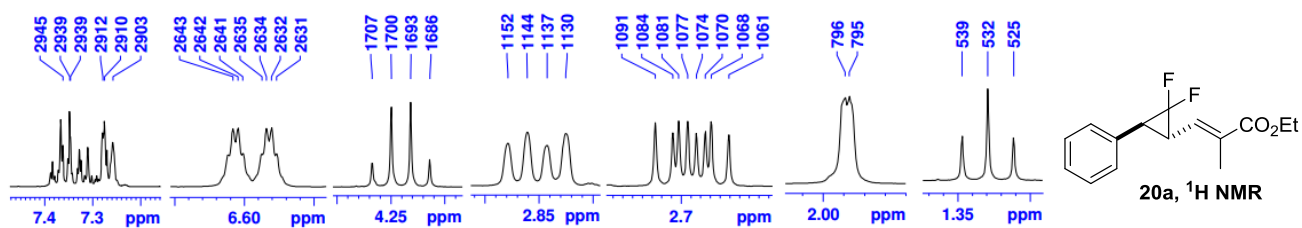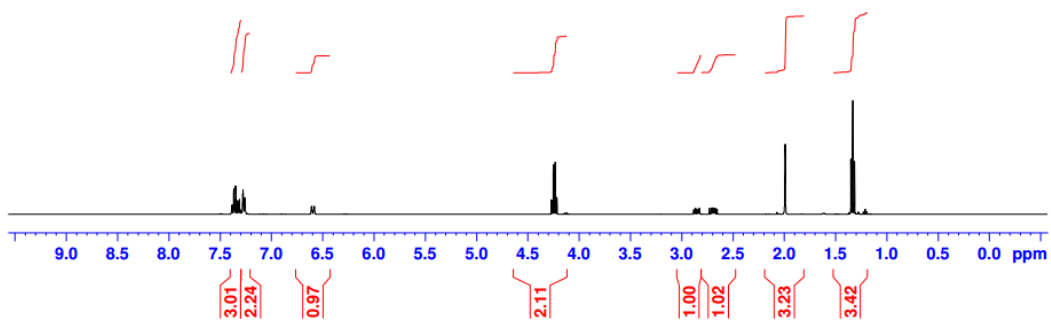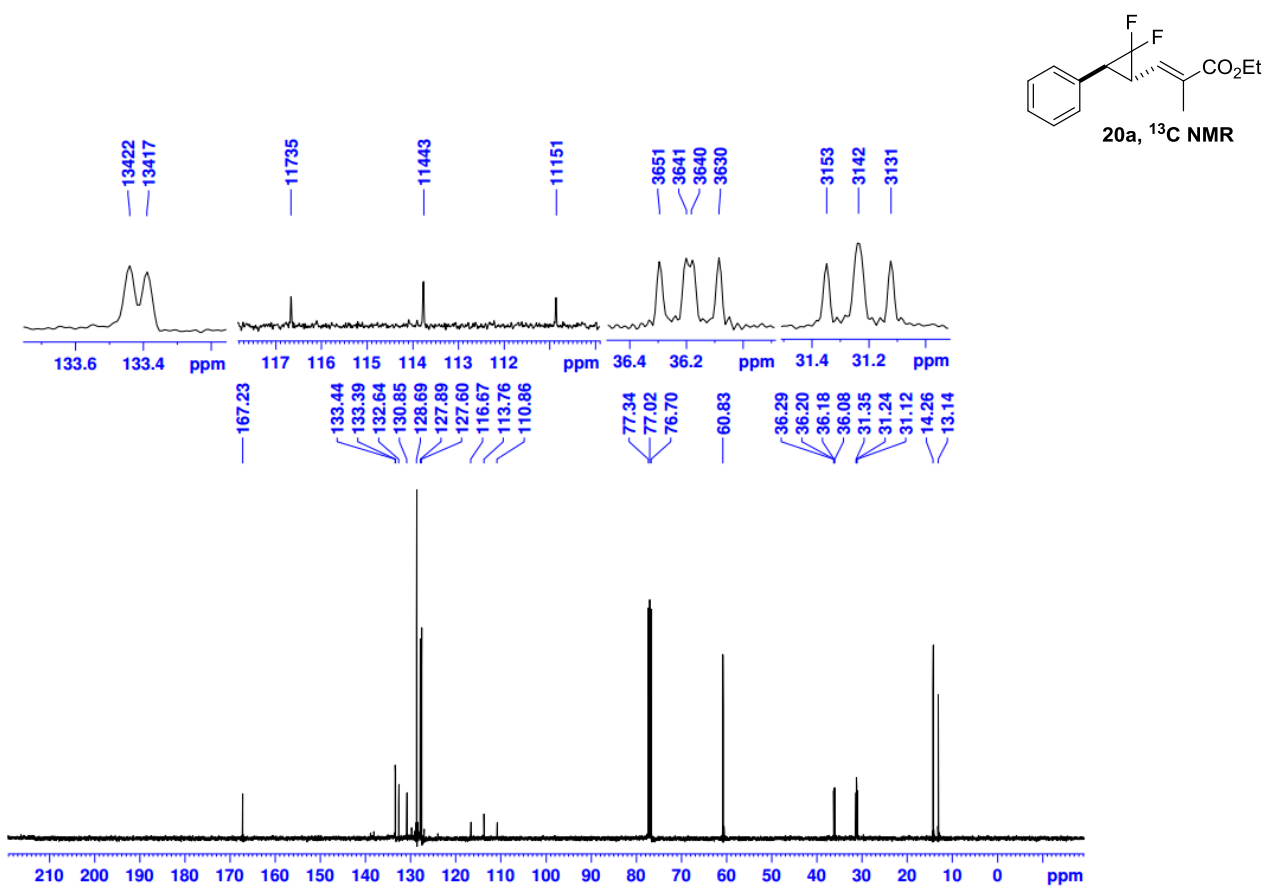

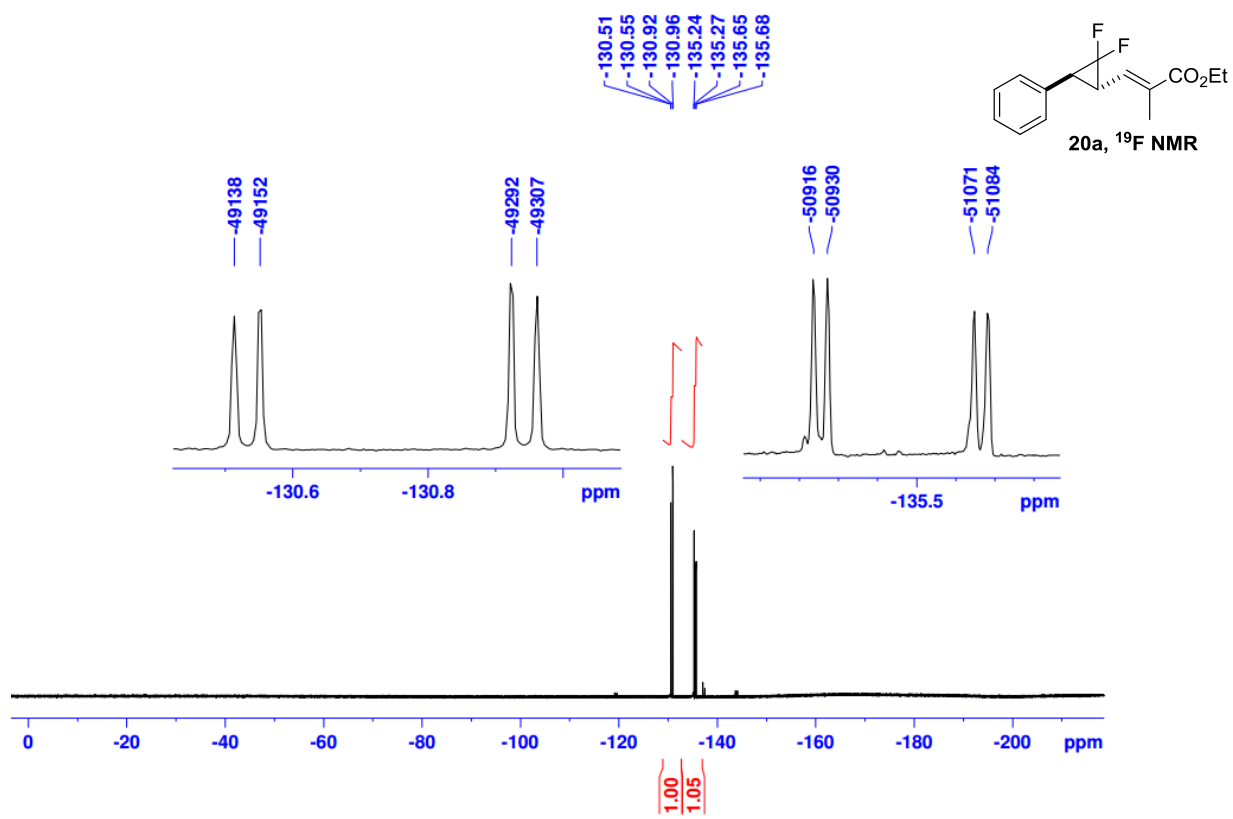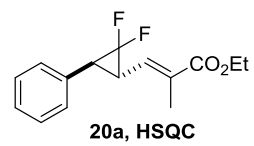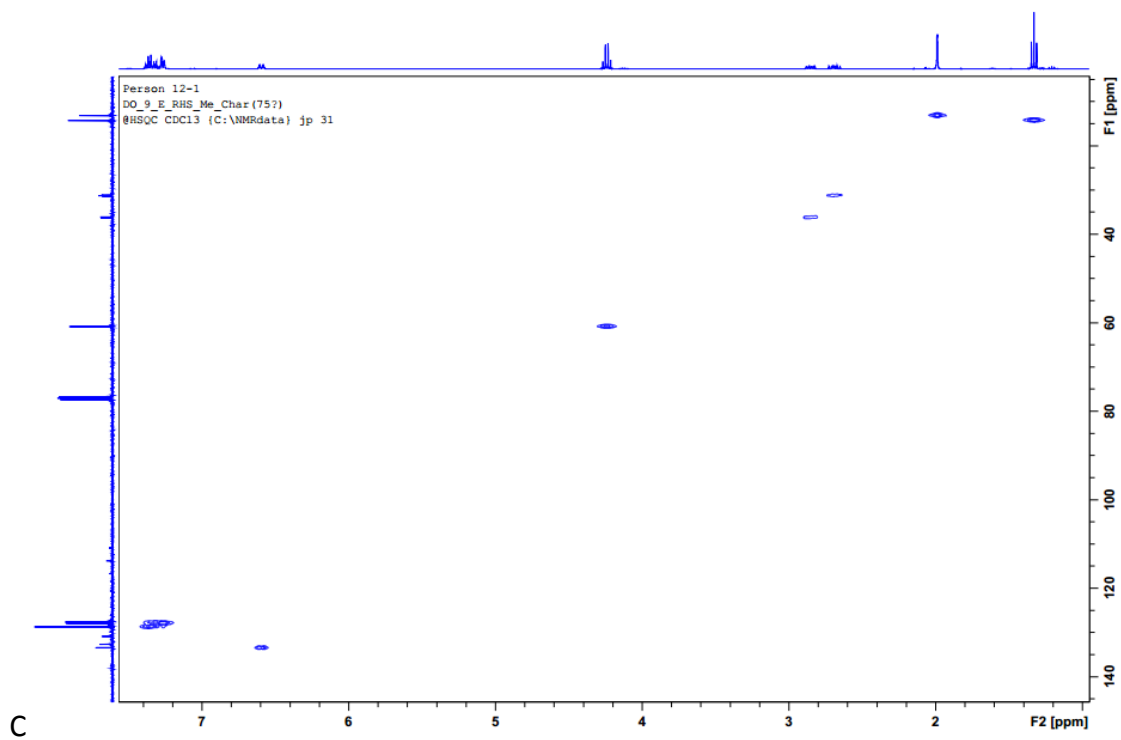

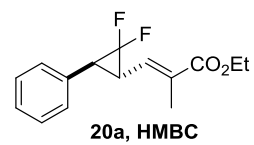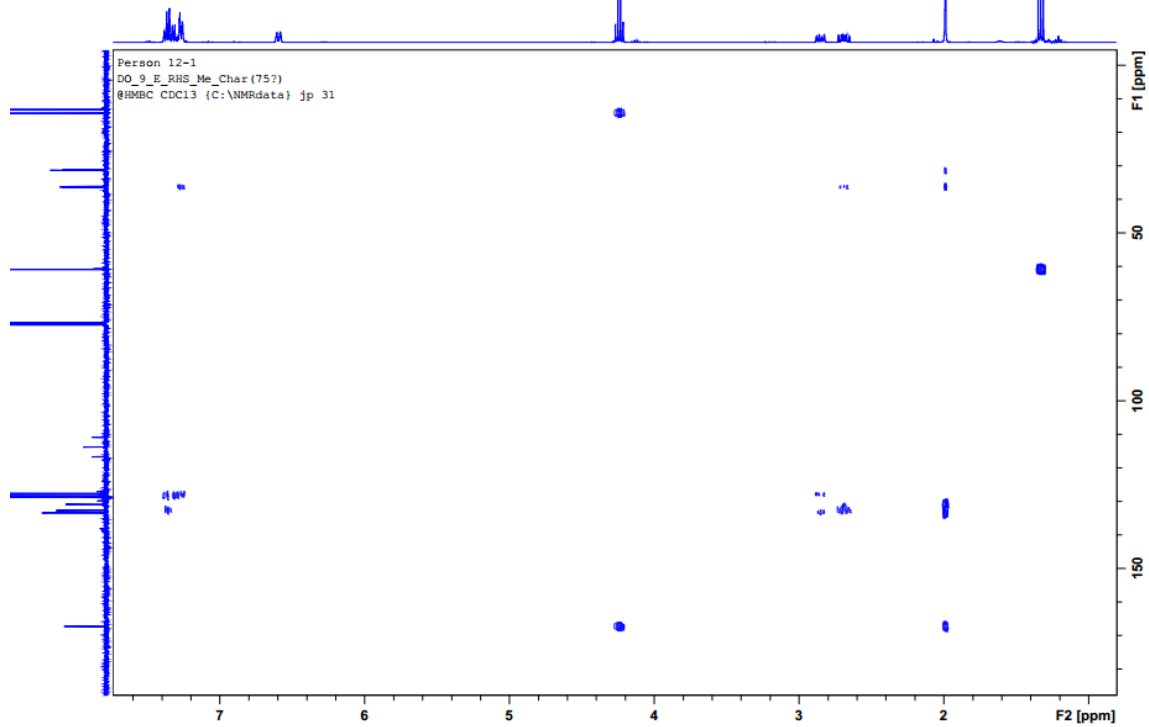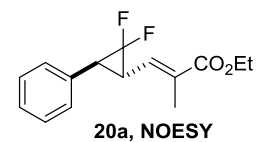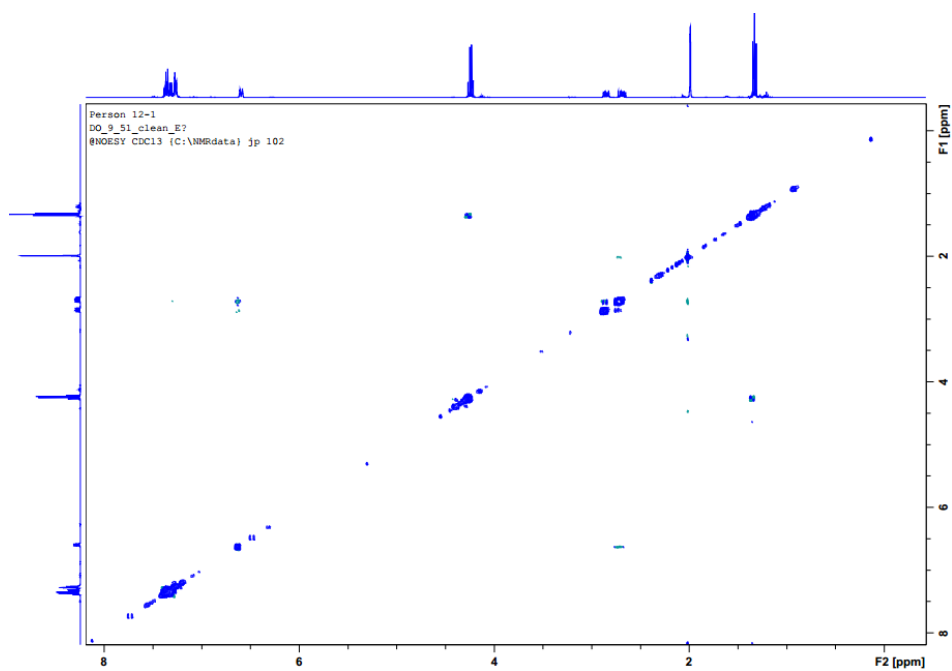

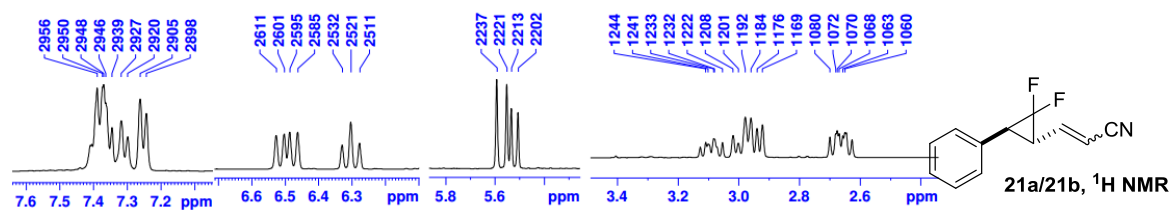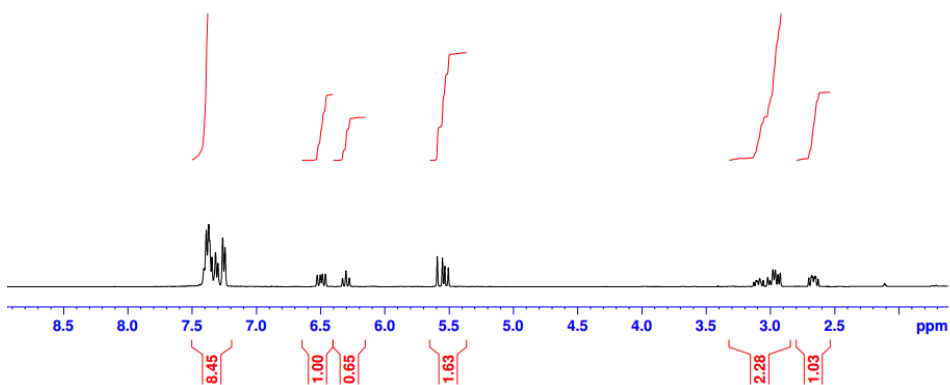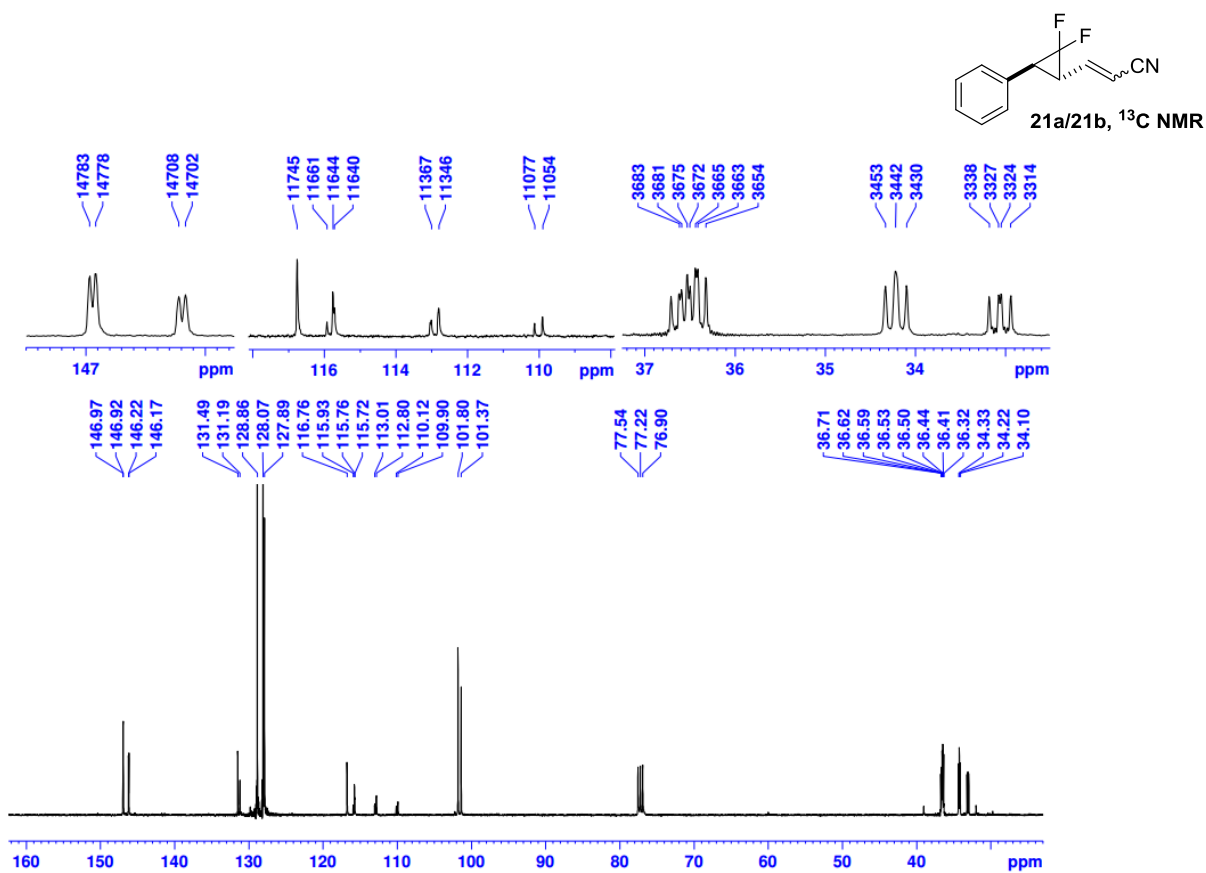

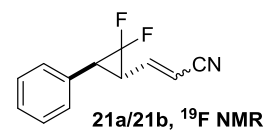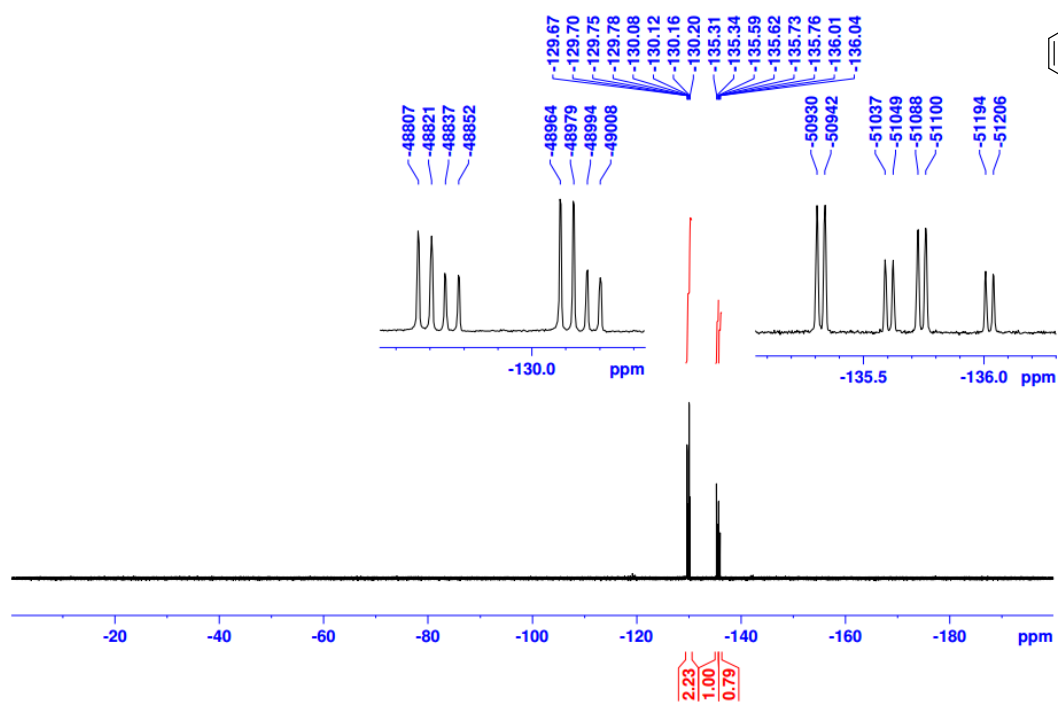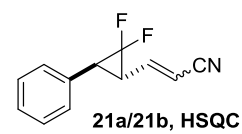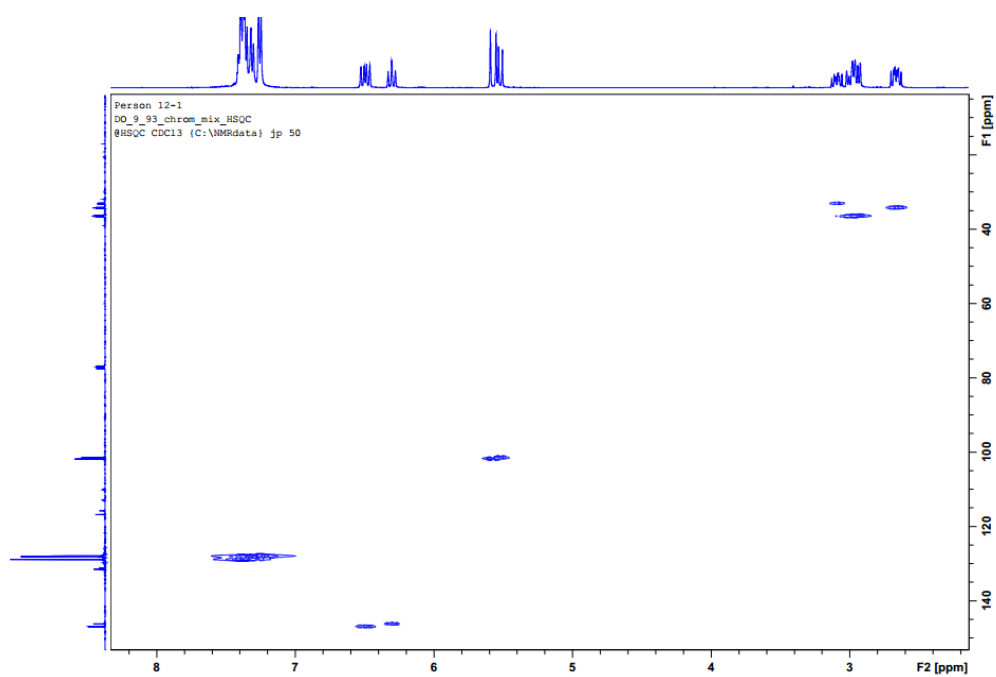

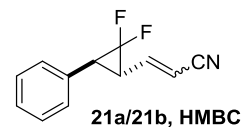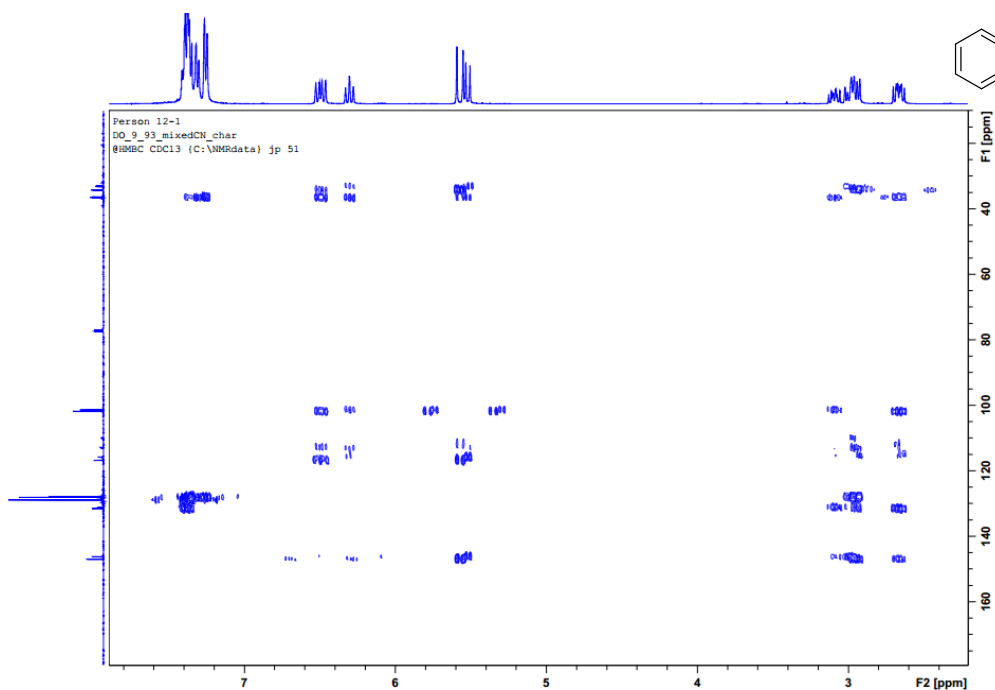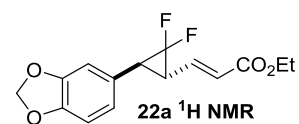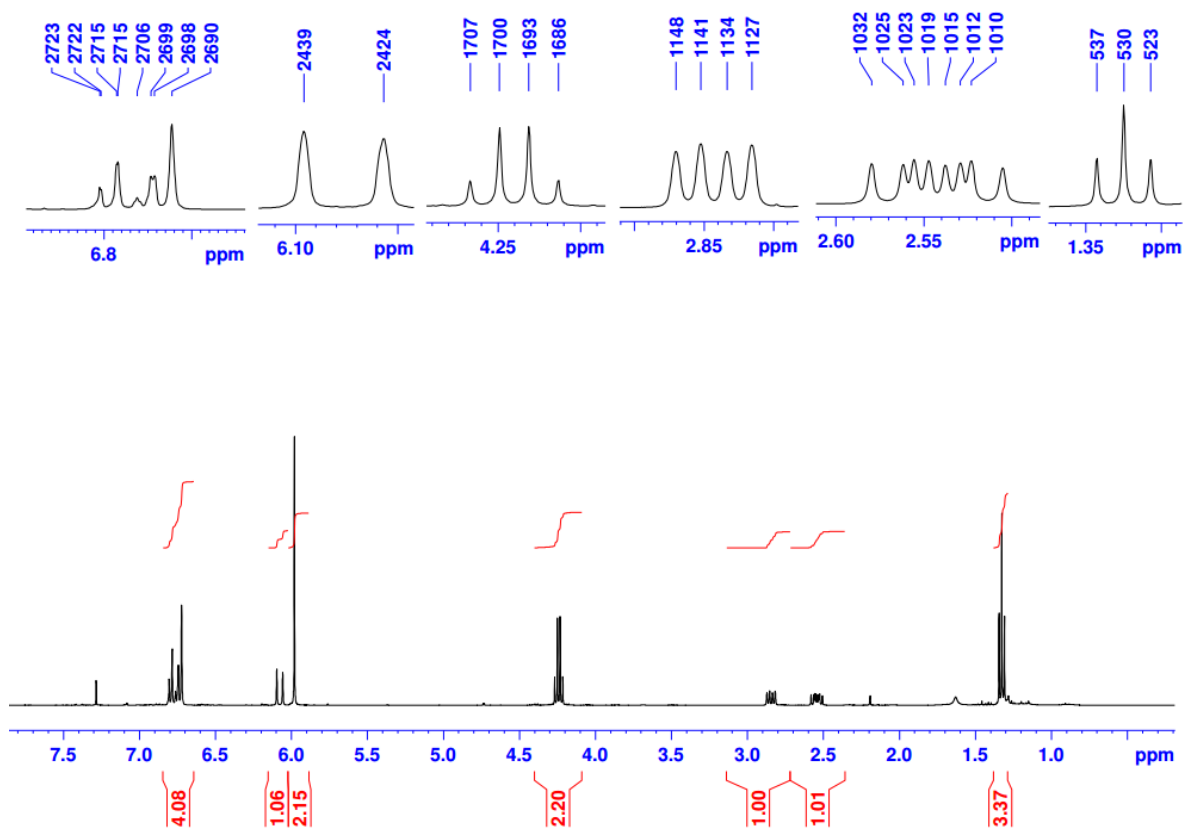

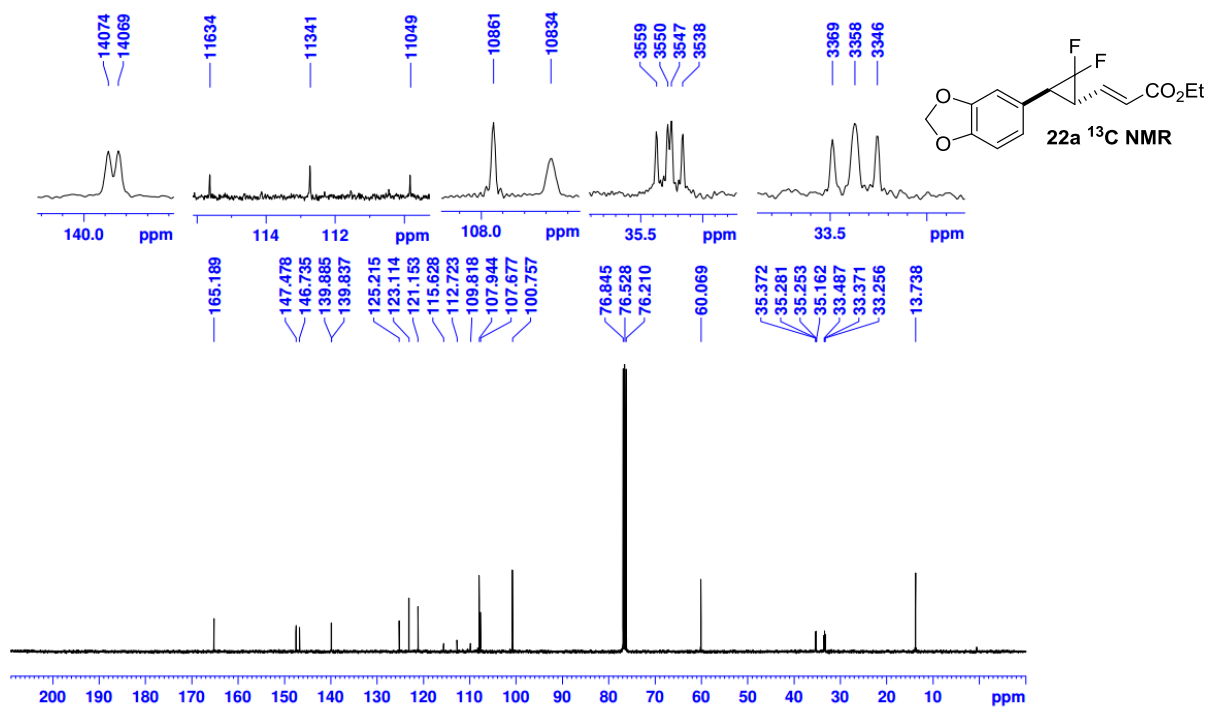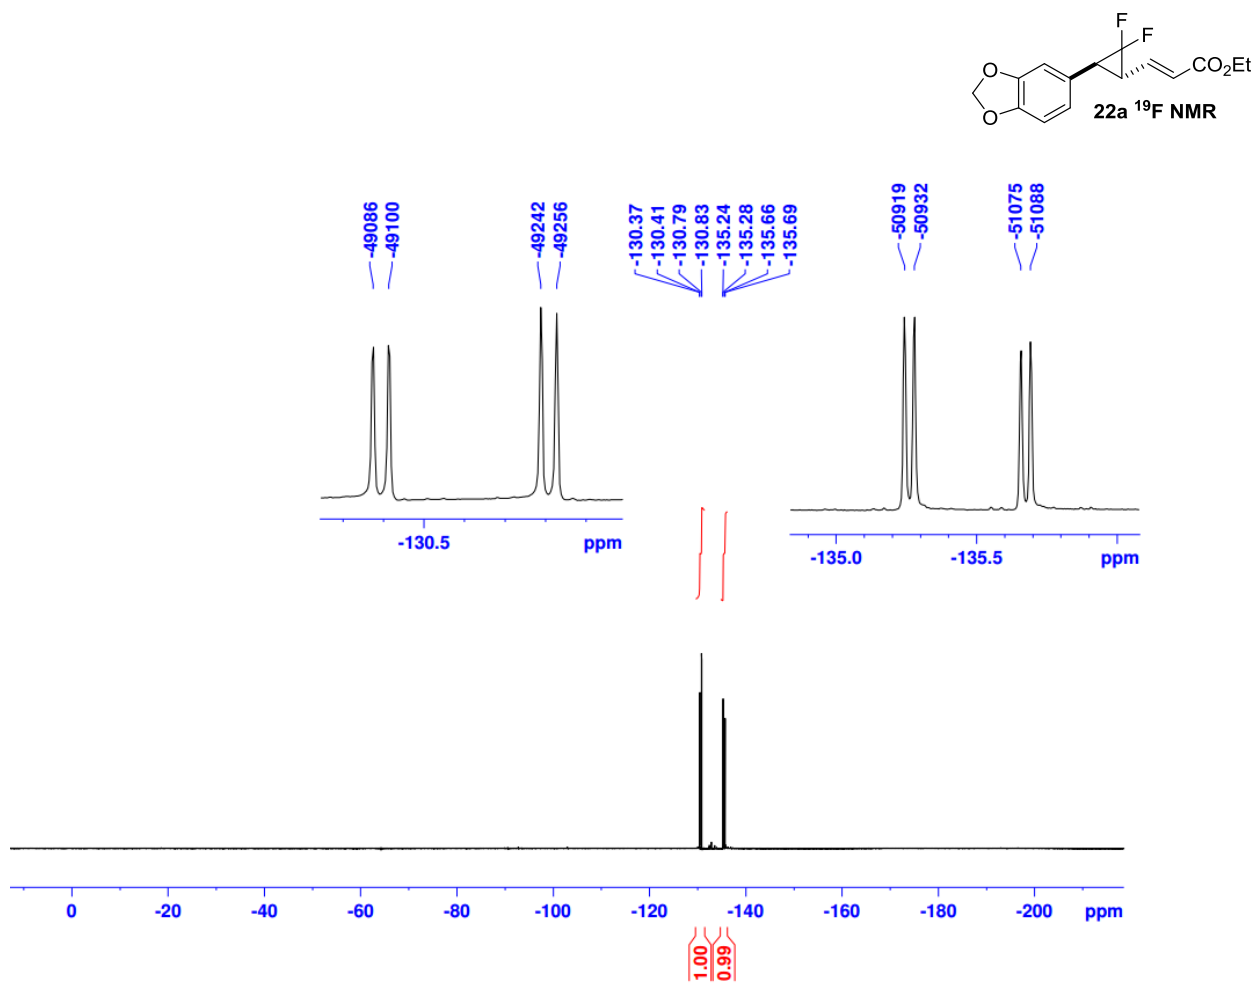

"D205928 30 P2 Char" 4 1 "C:\Users\David\Dropbox\1H NMR\DO\_PhD\_9\NMR"

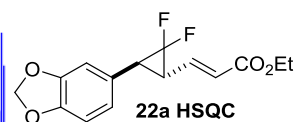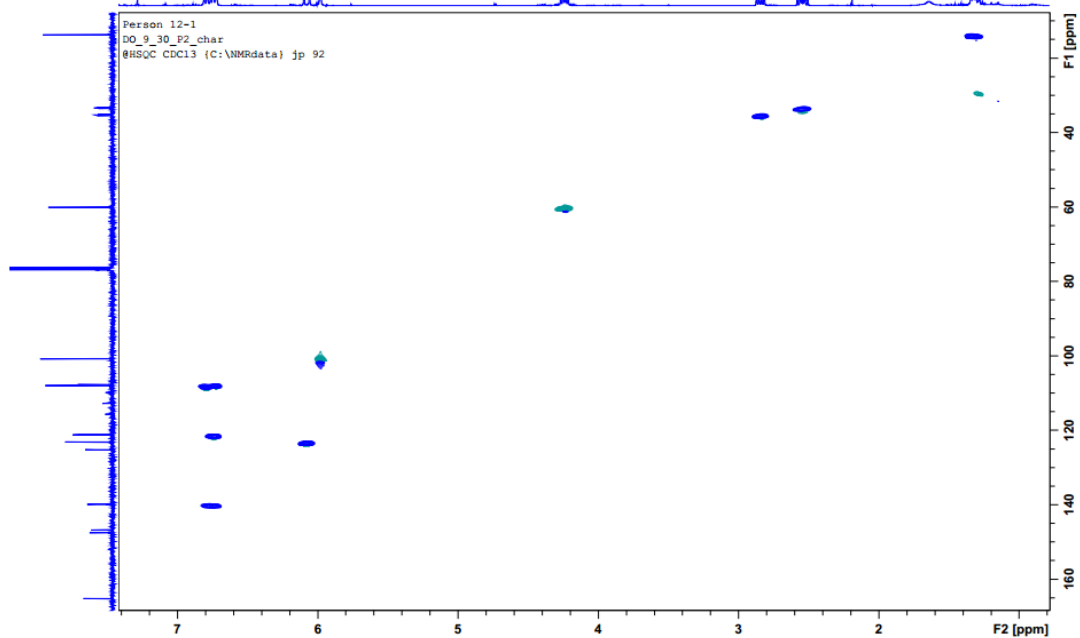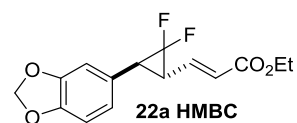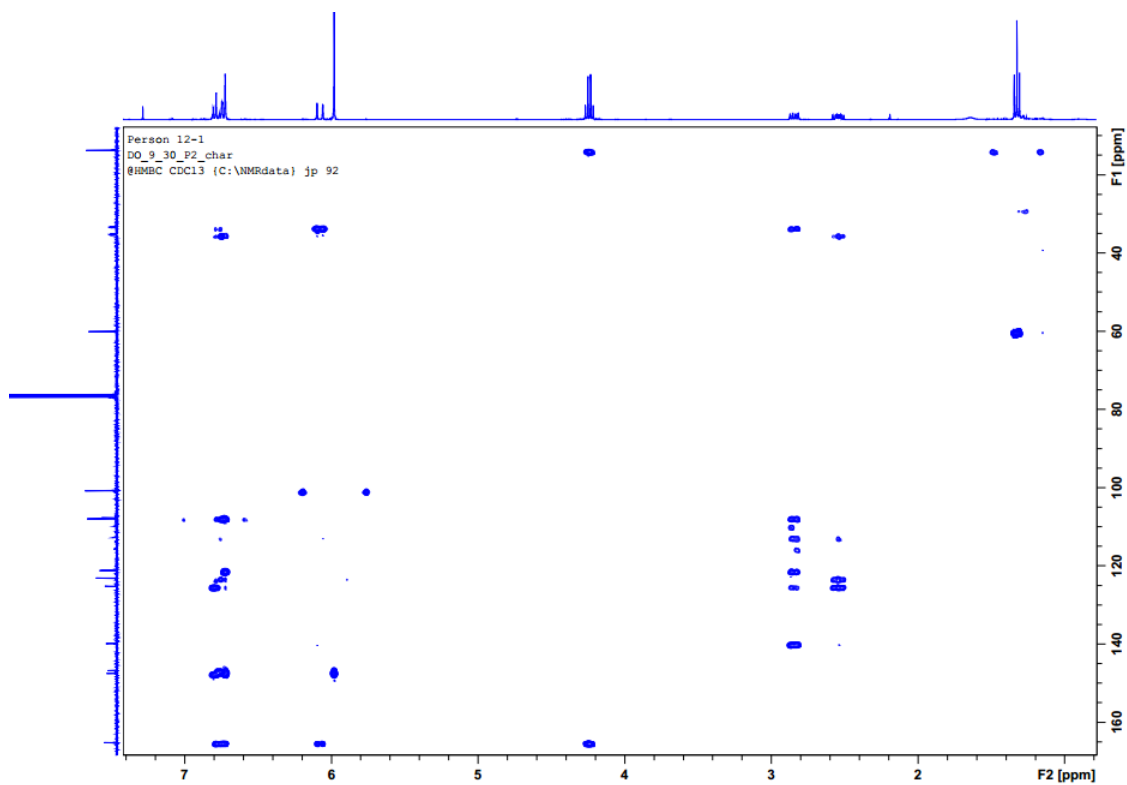



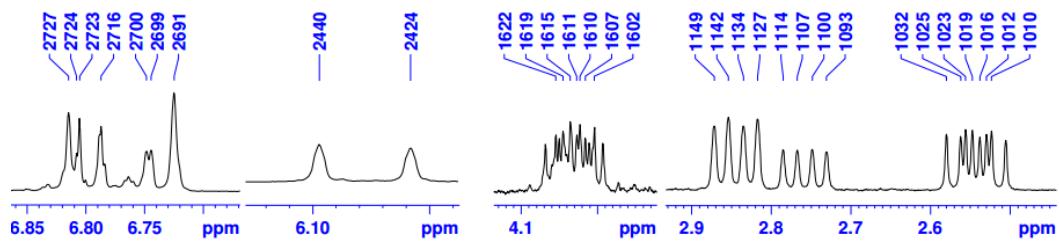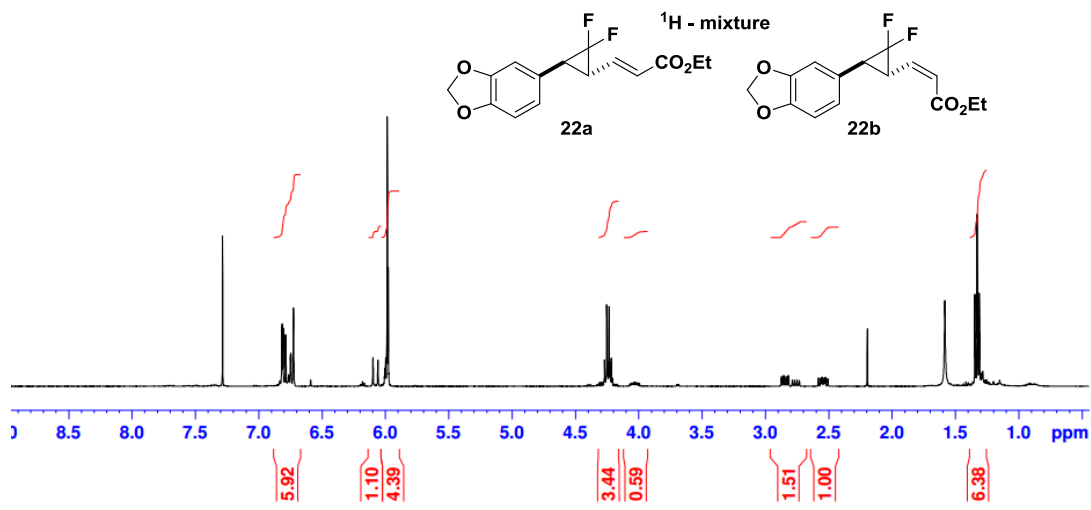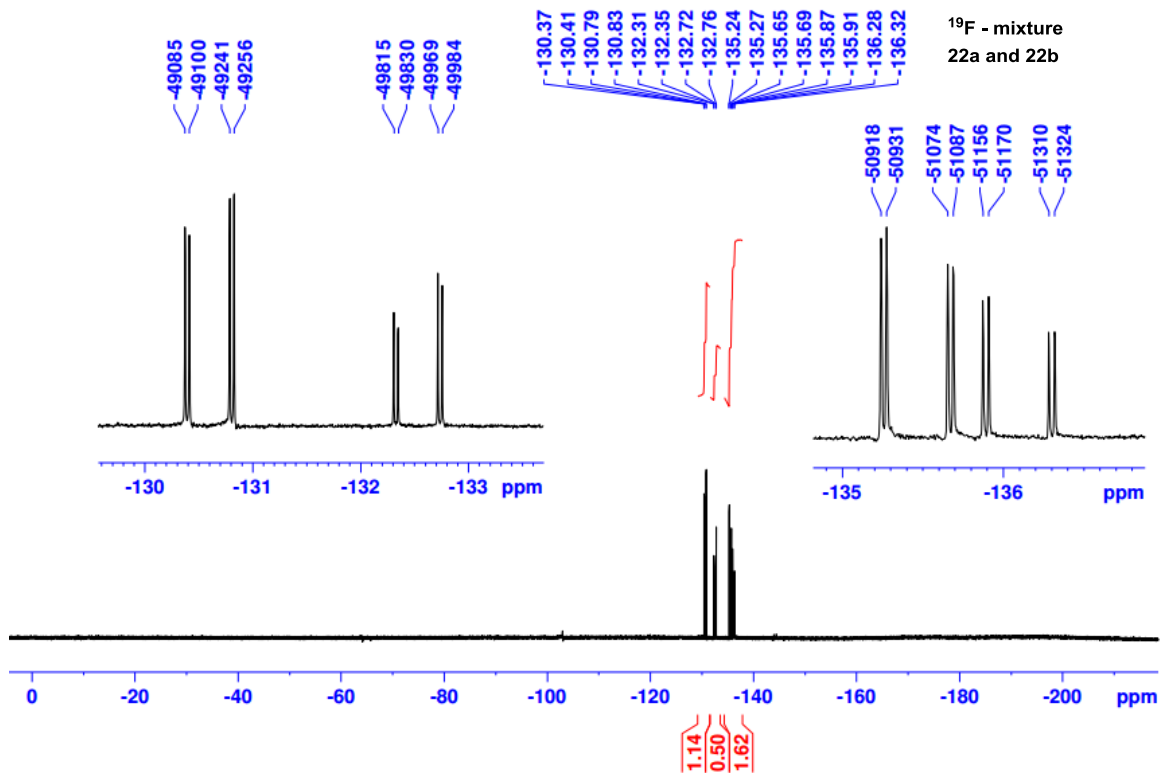

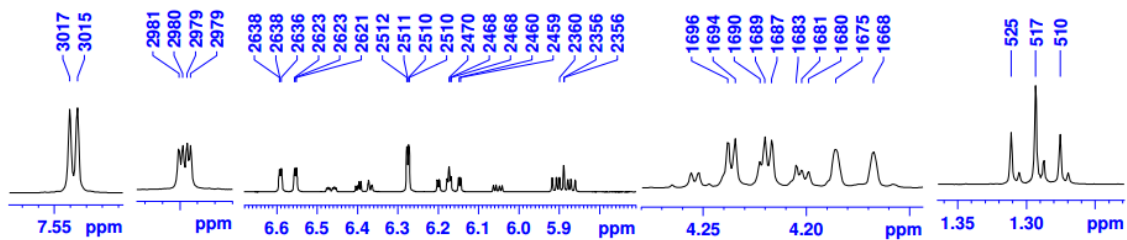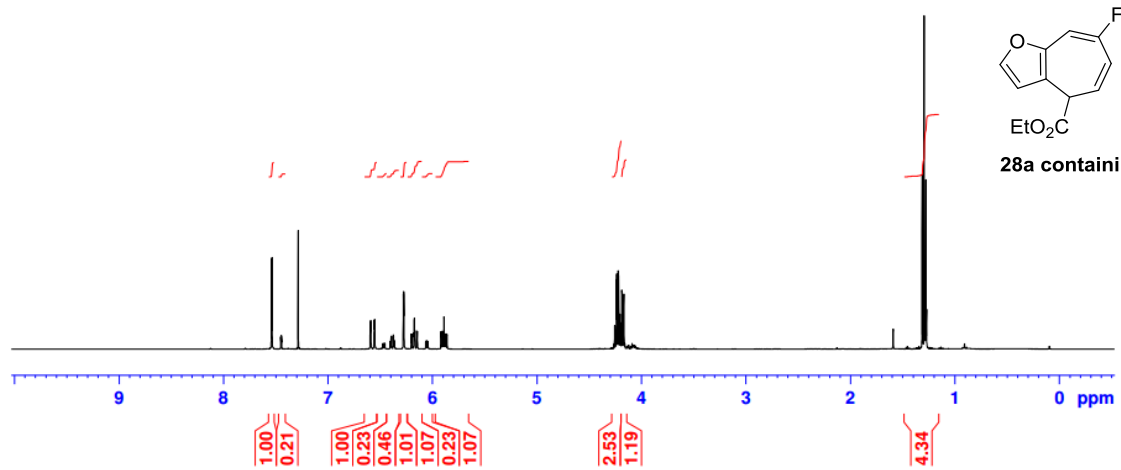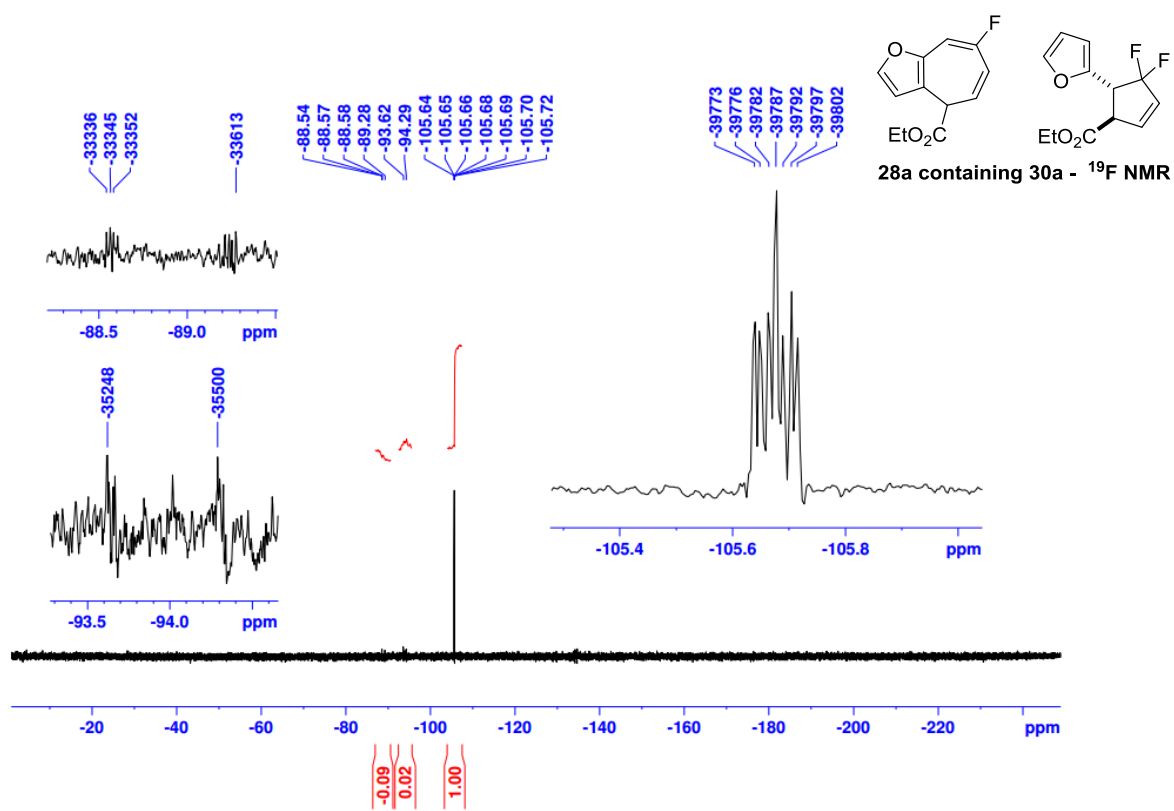

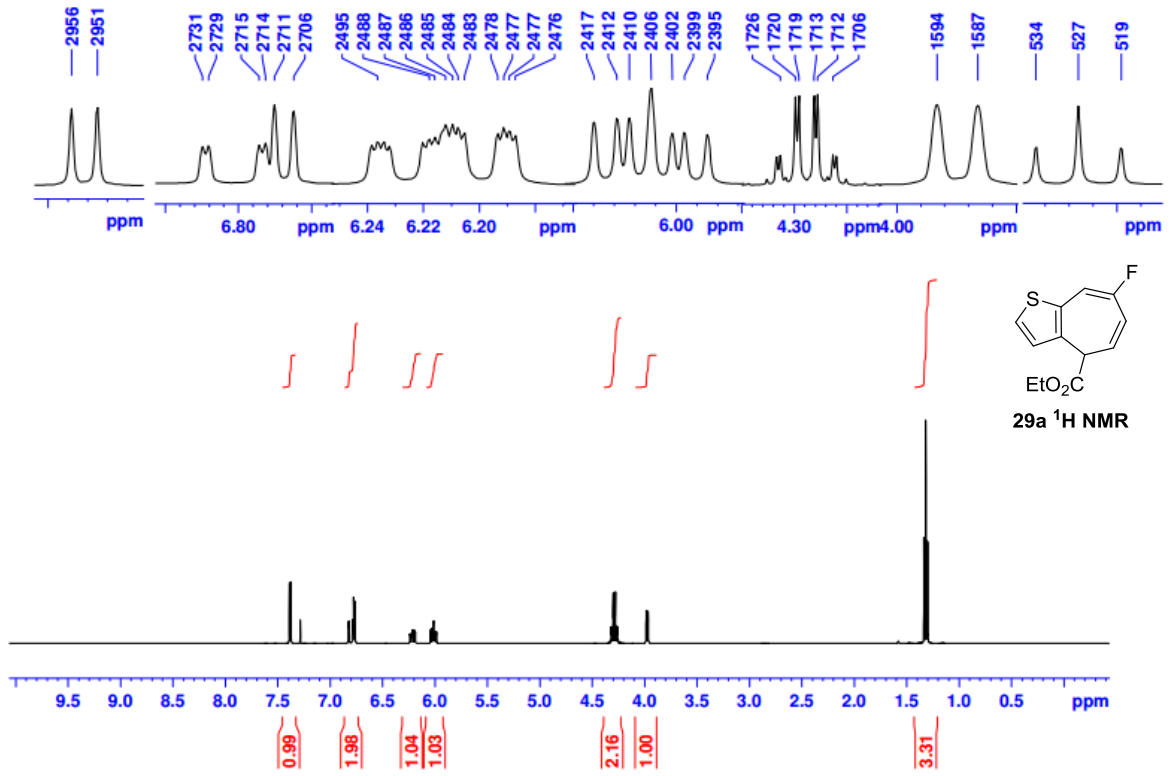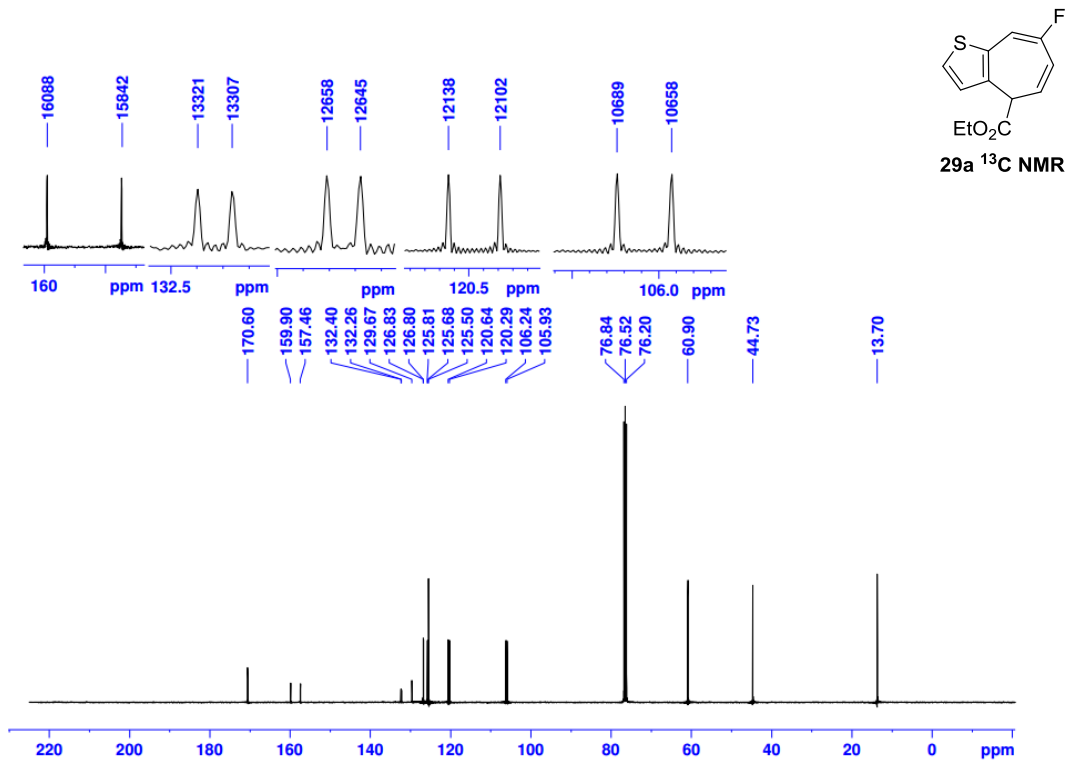

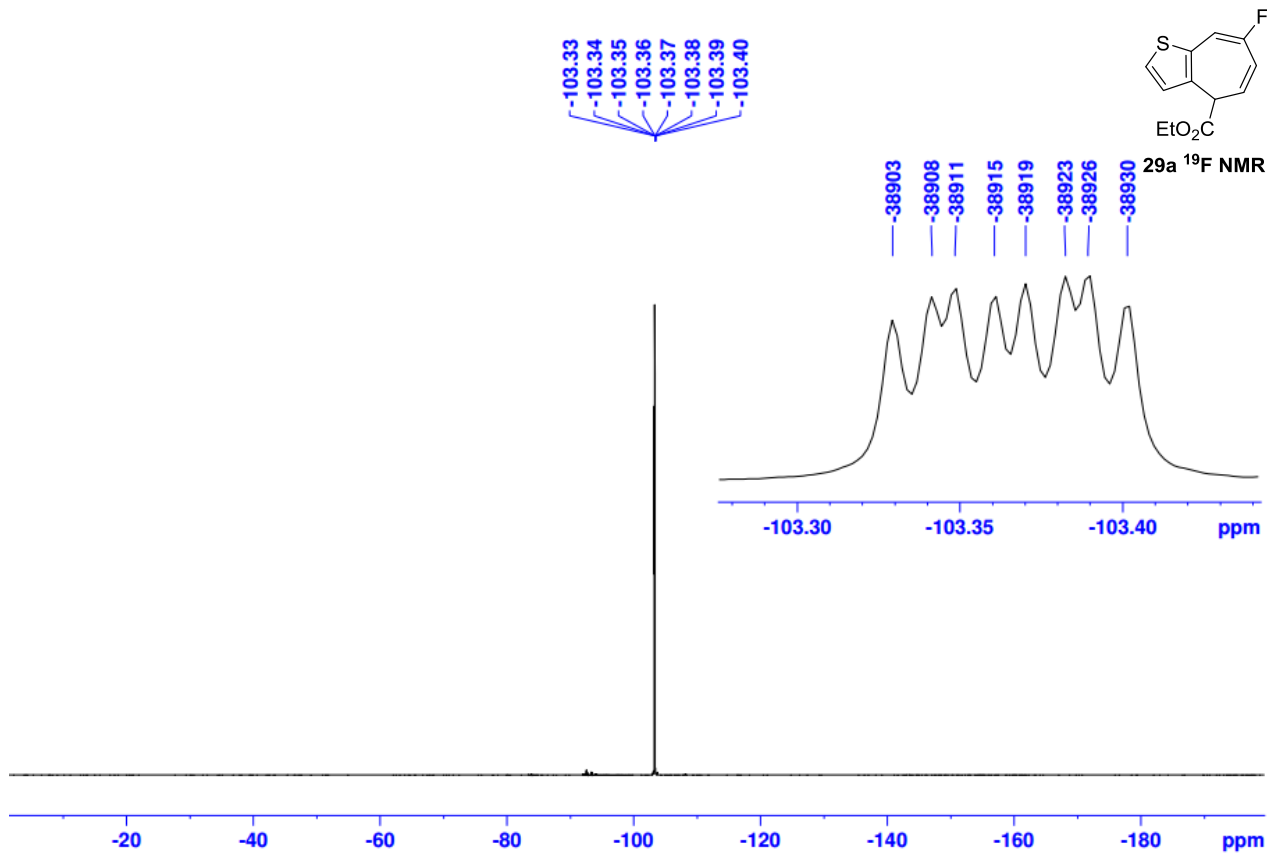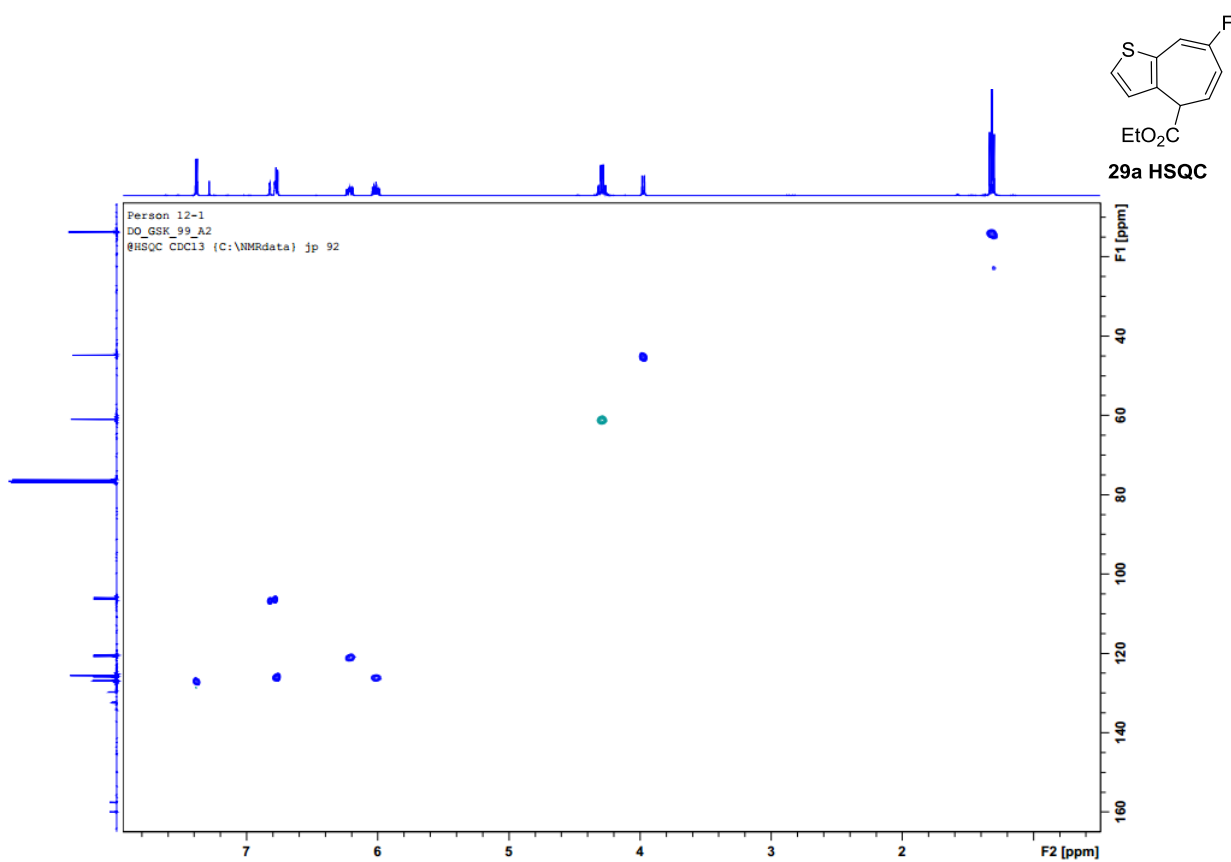

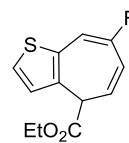

29a HMBC

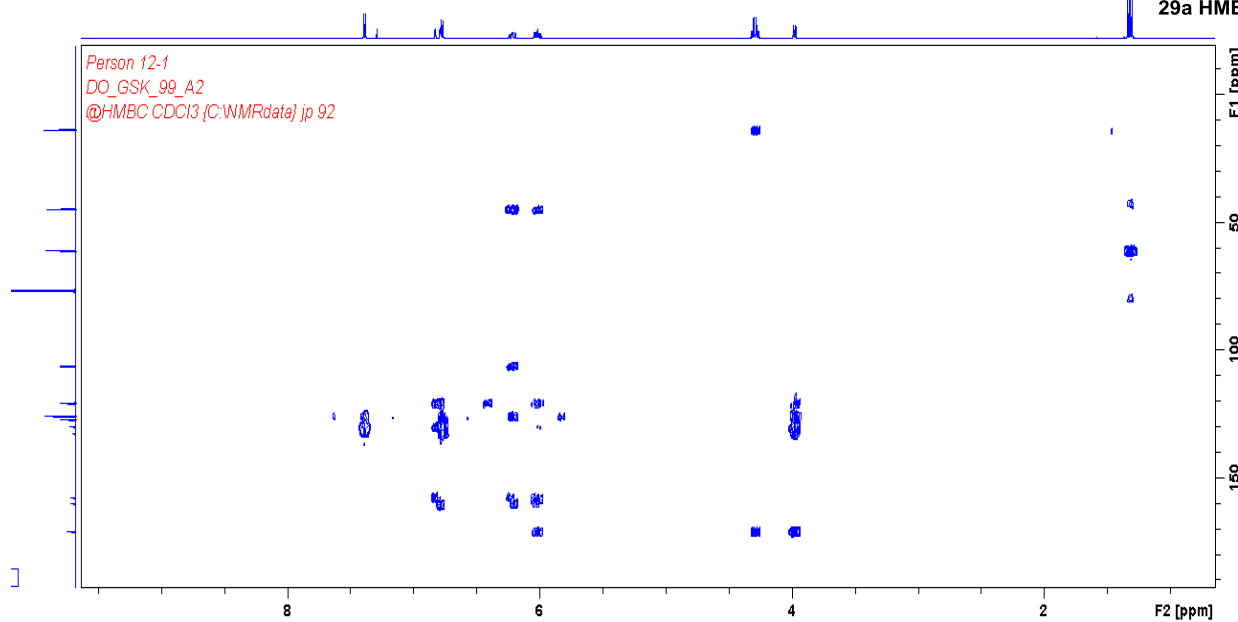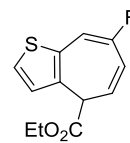

29a HMBC  
(expanded)

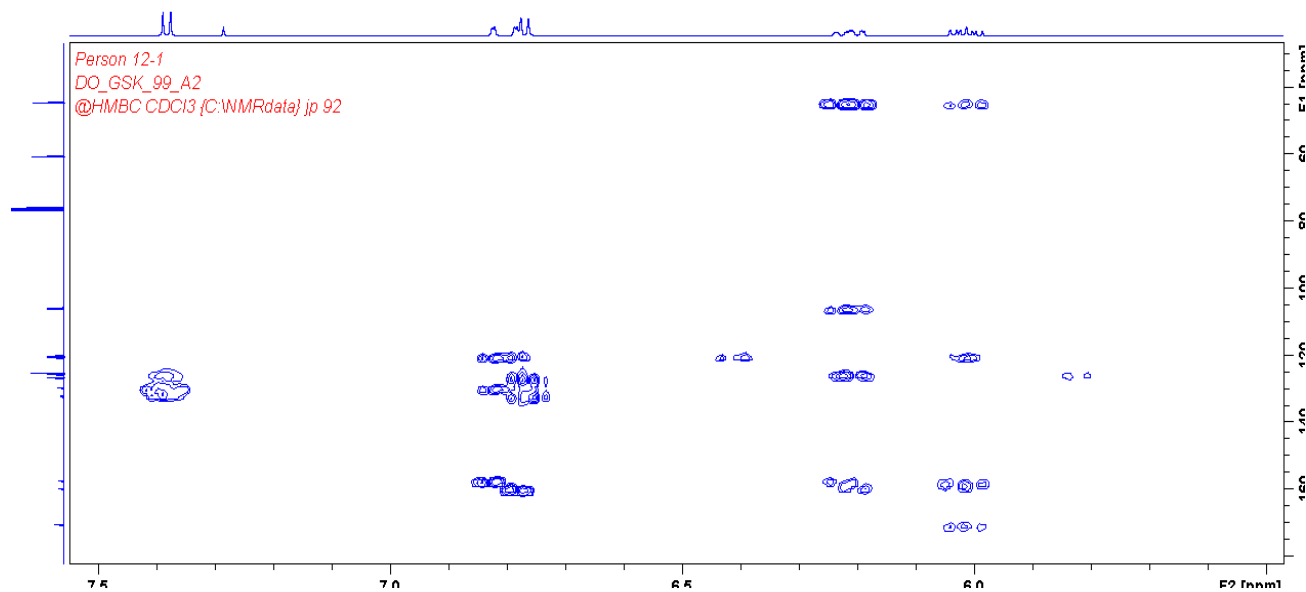

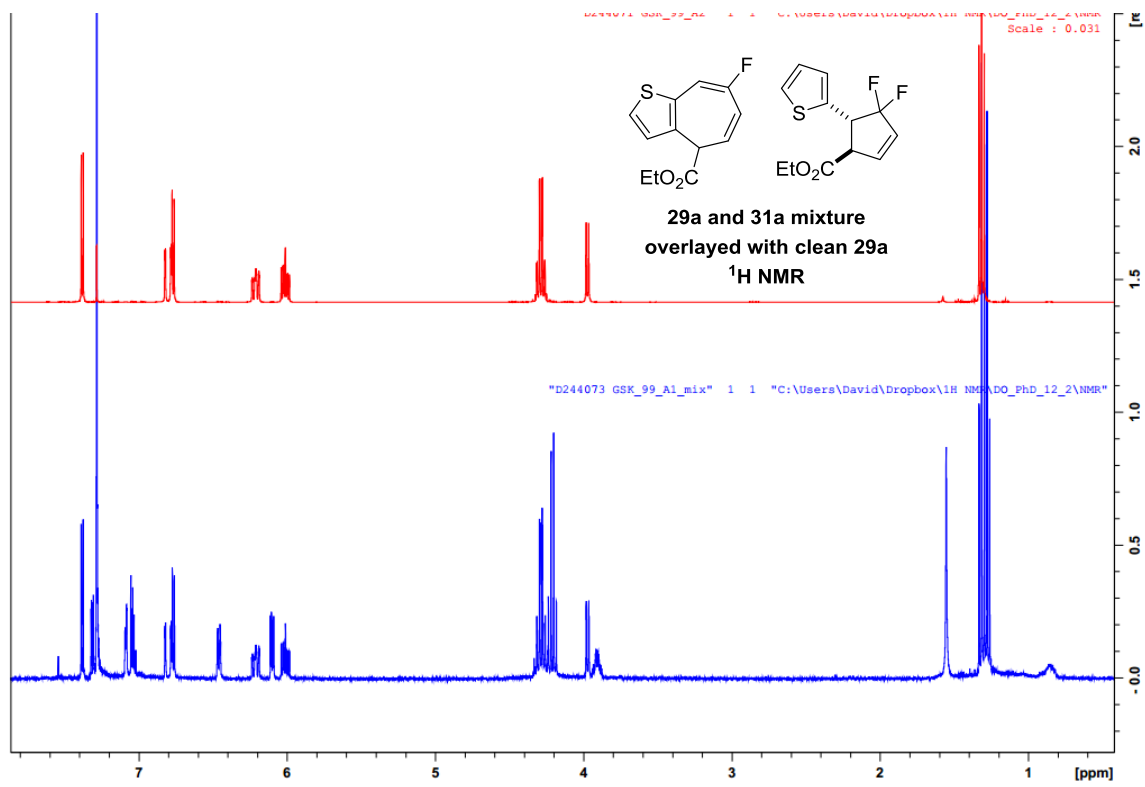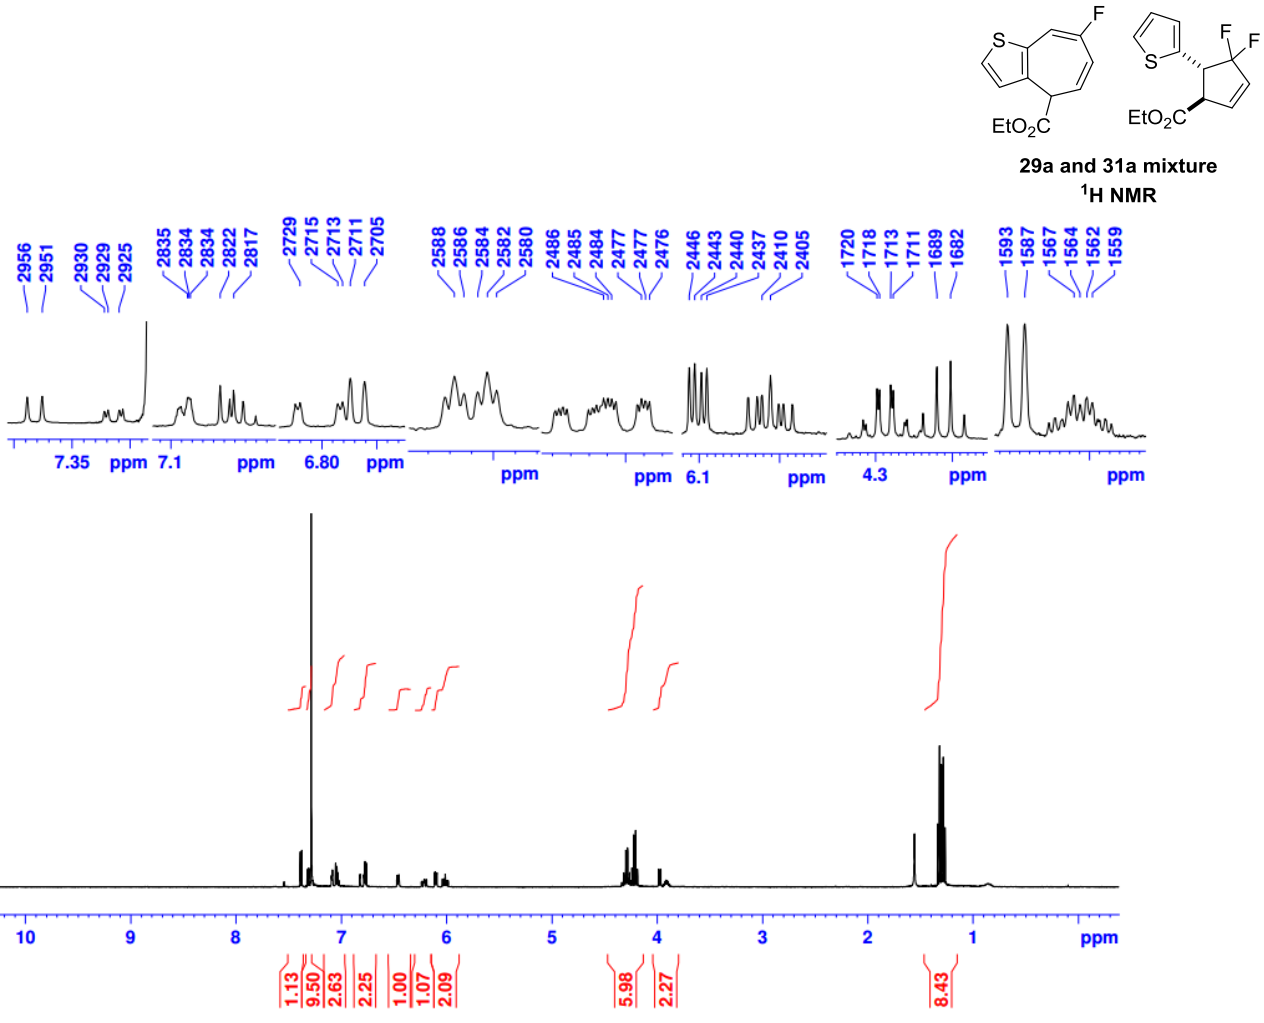

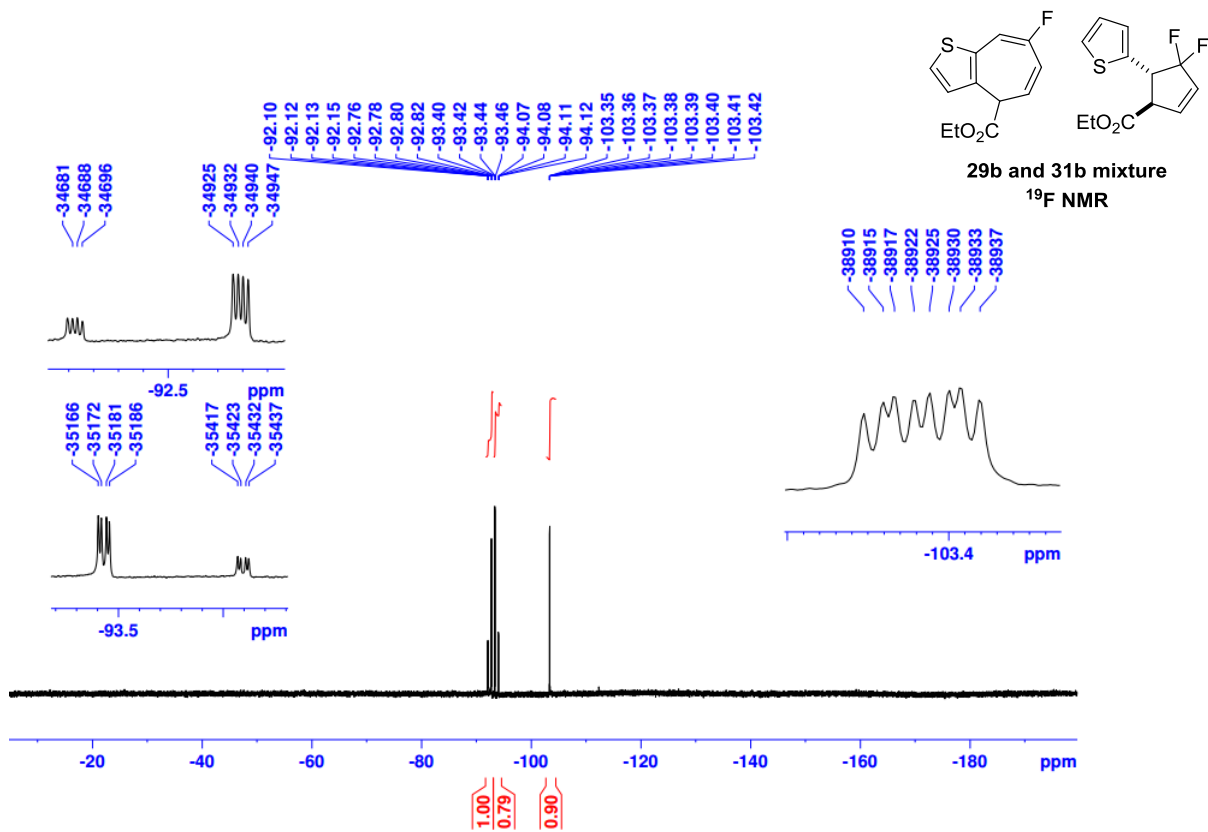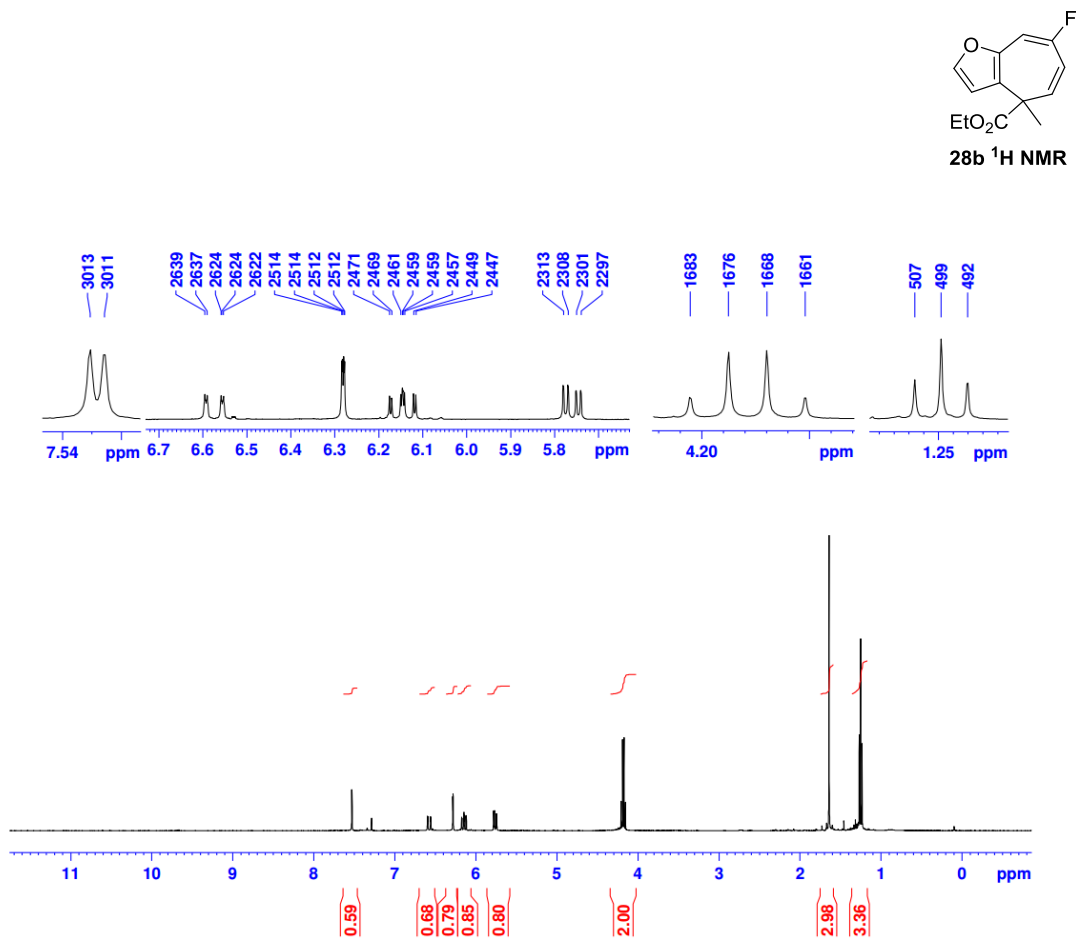

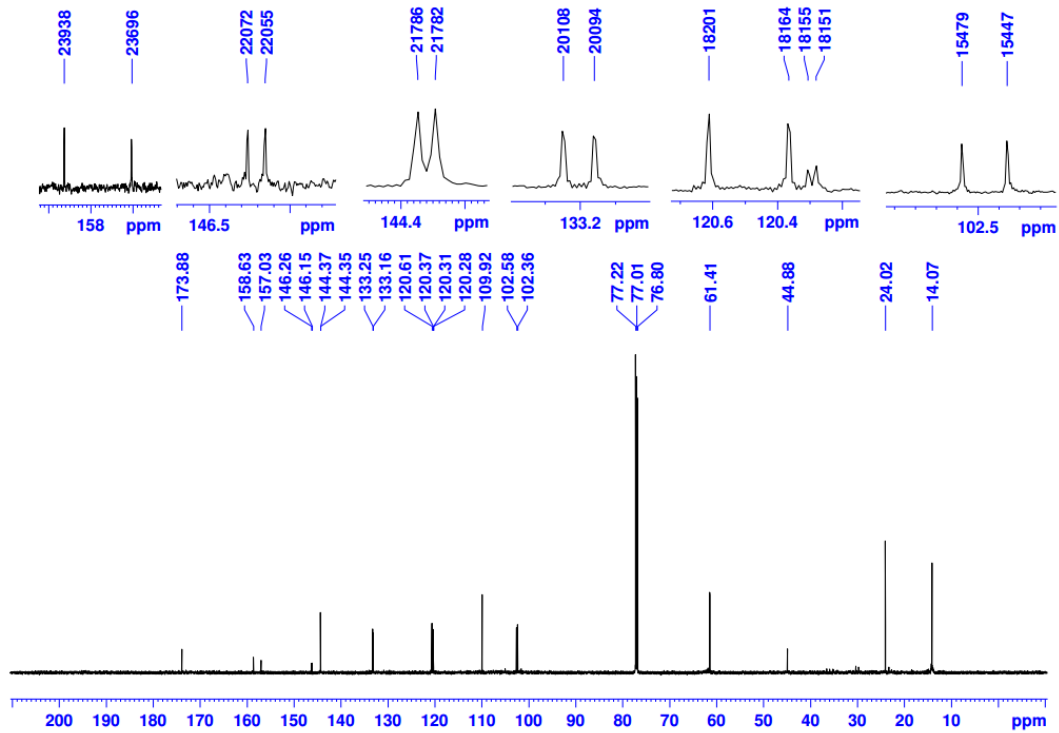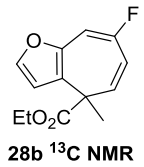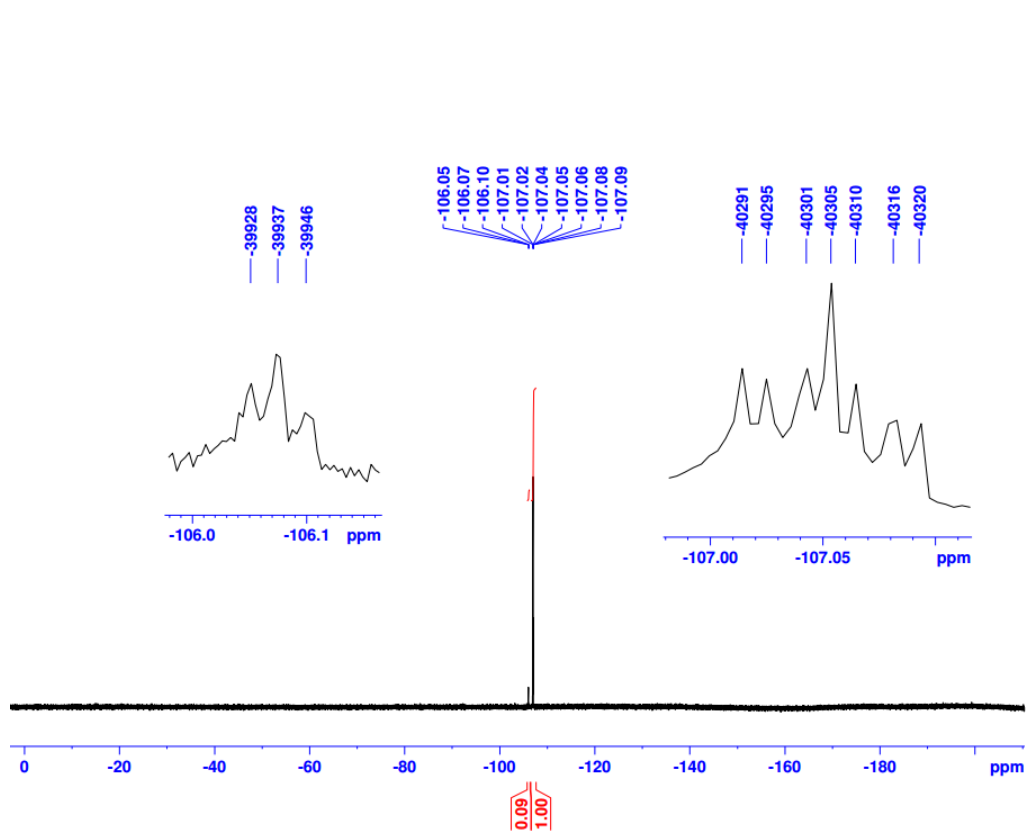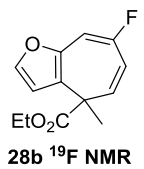



"D229969 11\_53A\_char" 6 1 "C:\Users\David\Dropbox\1H NMR\DO\_PhD\_11\NMR"

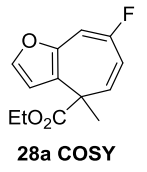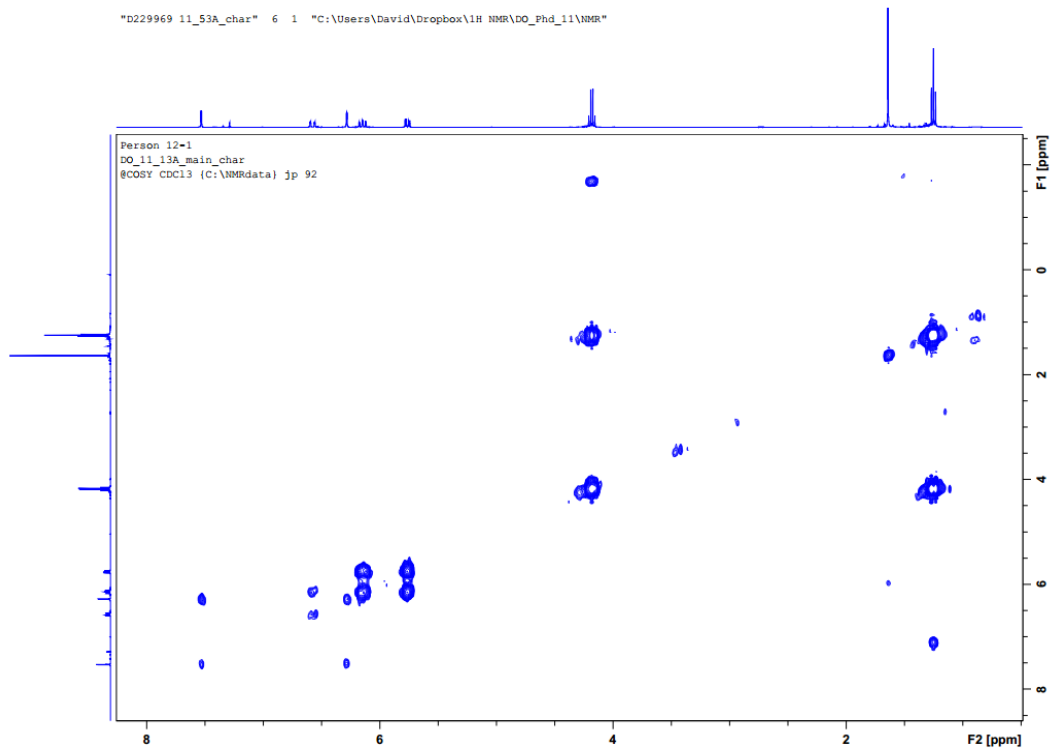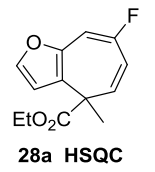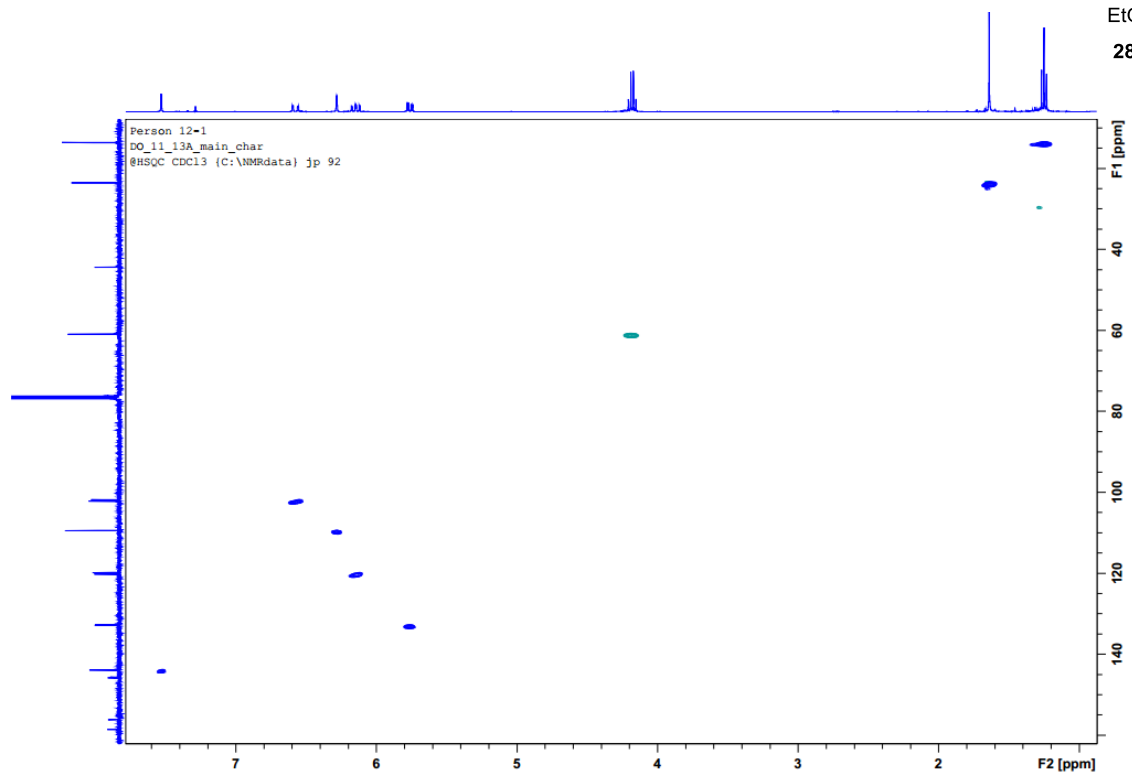

"C04128 DO\_11\_53A\_char" 3 1 "C:\Users\David\Dropbox\1H NMR\DO\_Ph�\_11\NMR"

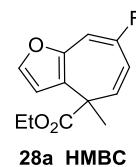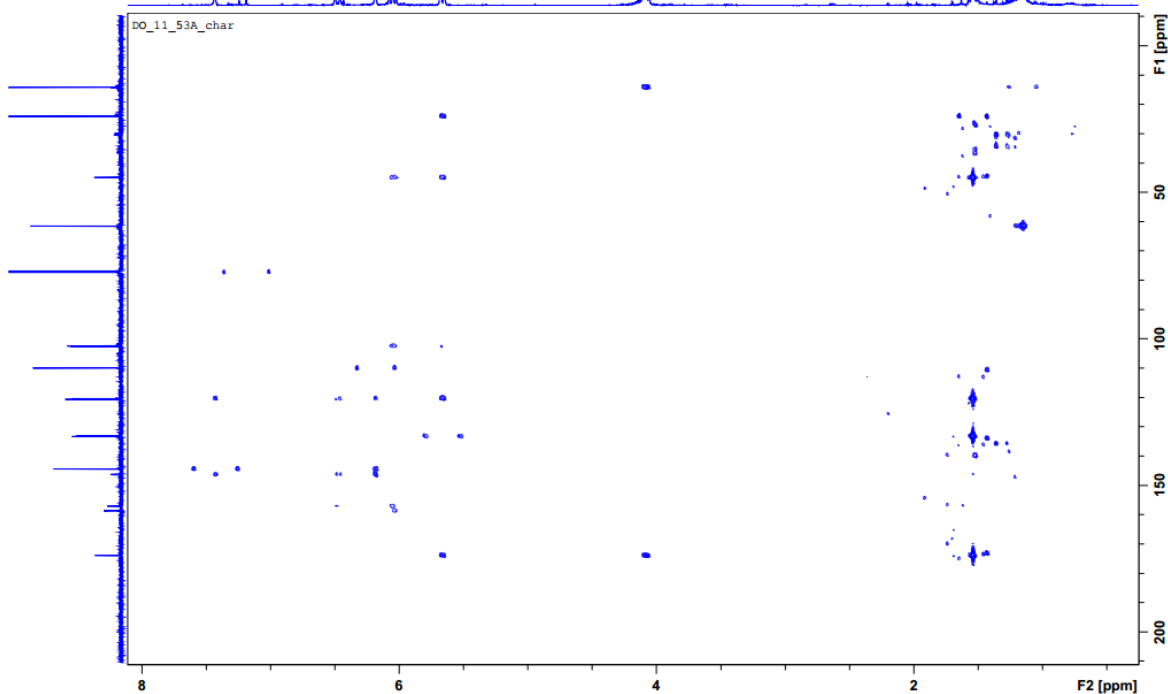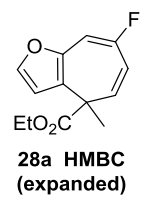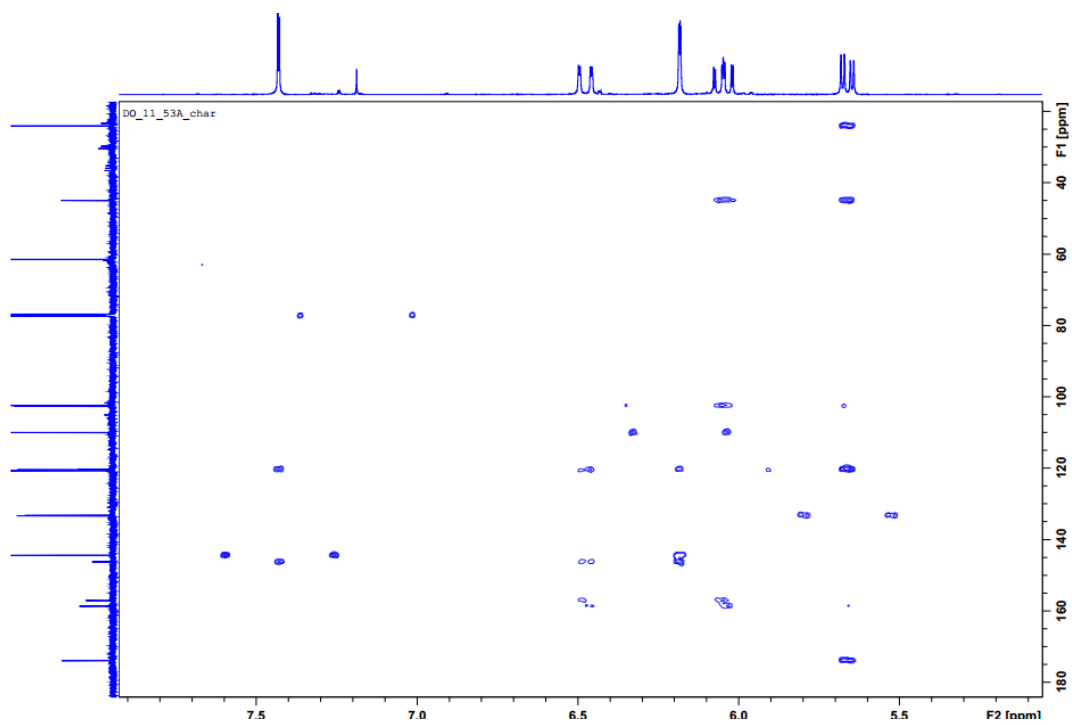

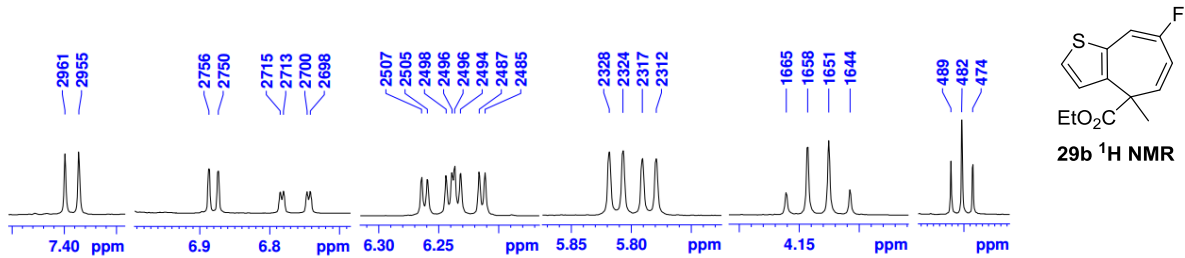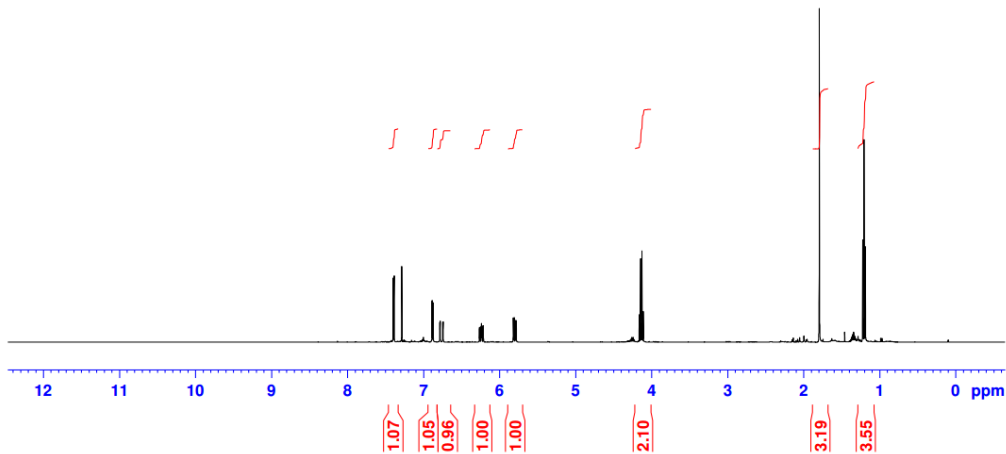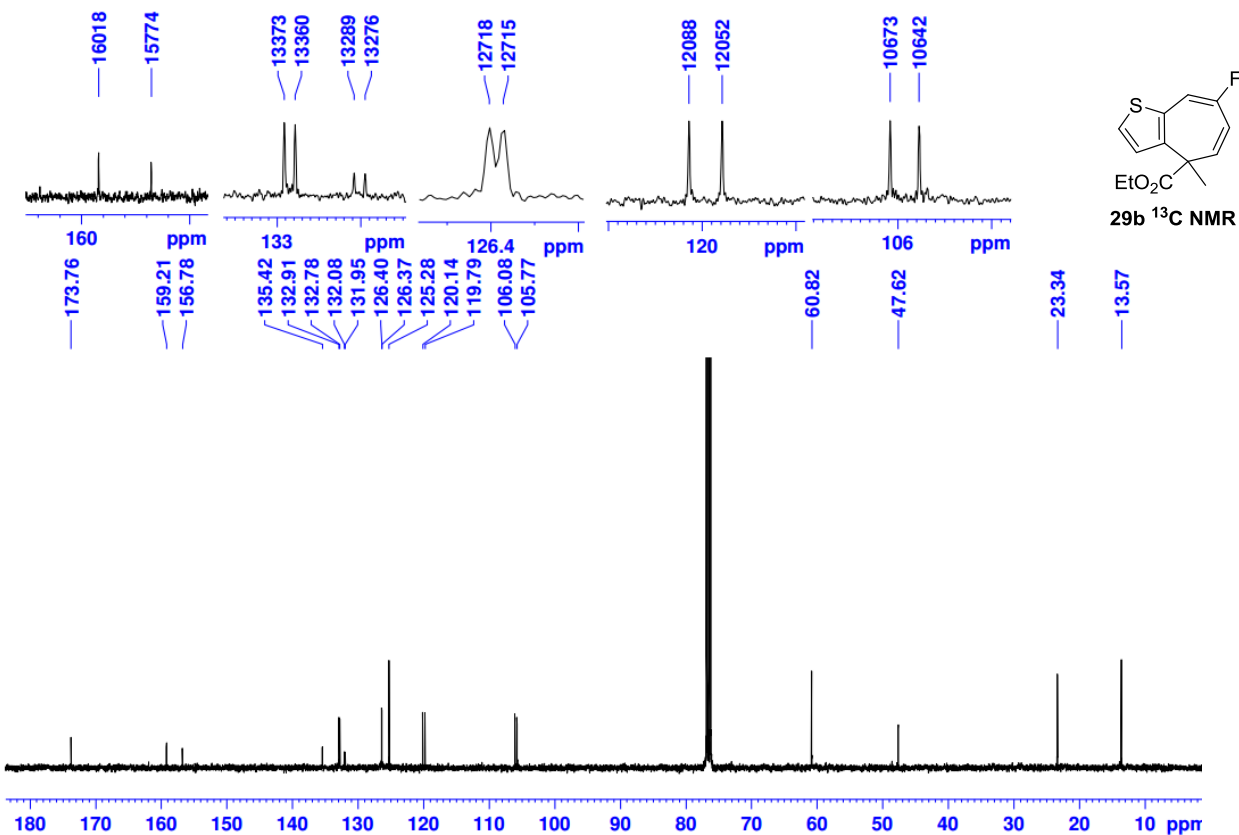

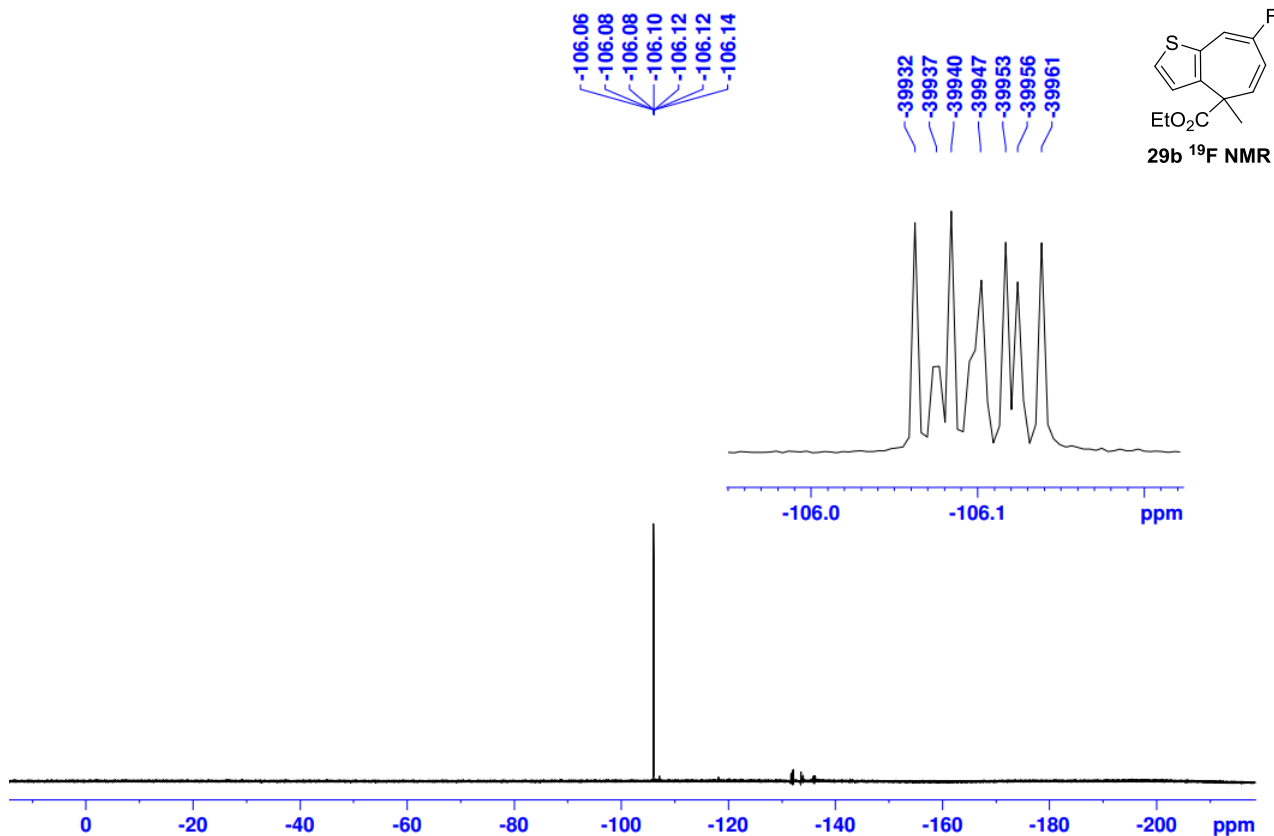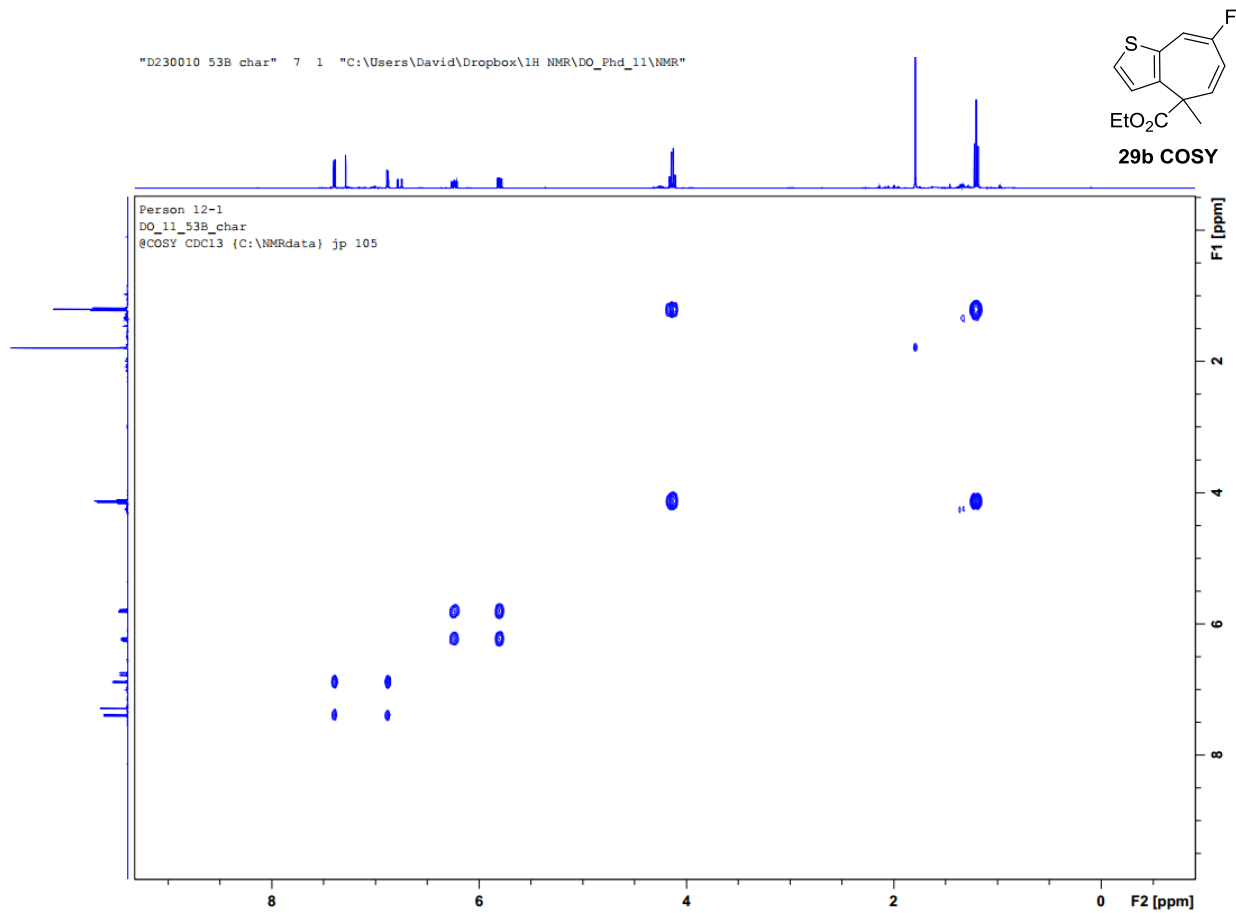

"D230010 53B char" 5 1 "C:\Users\David\Dropbox\1H NMR\DO\_PhD\_11\NMR"

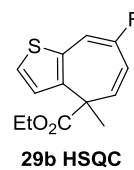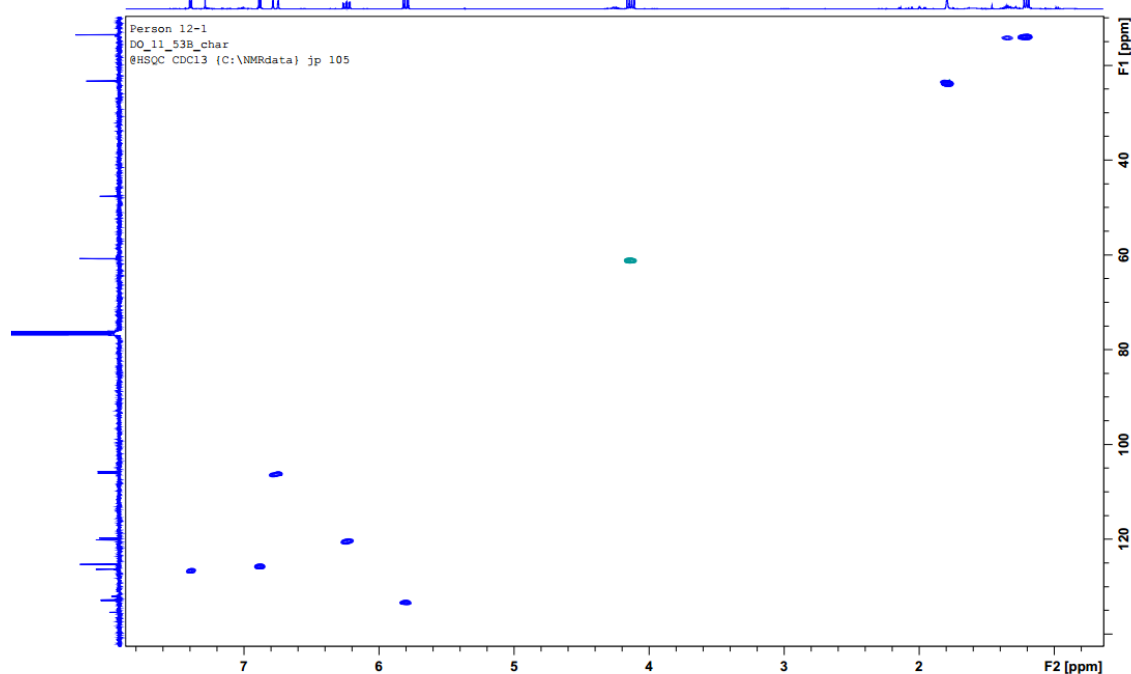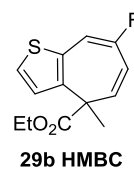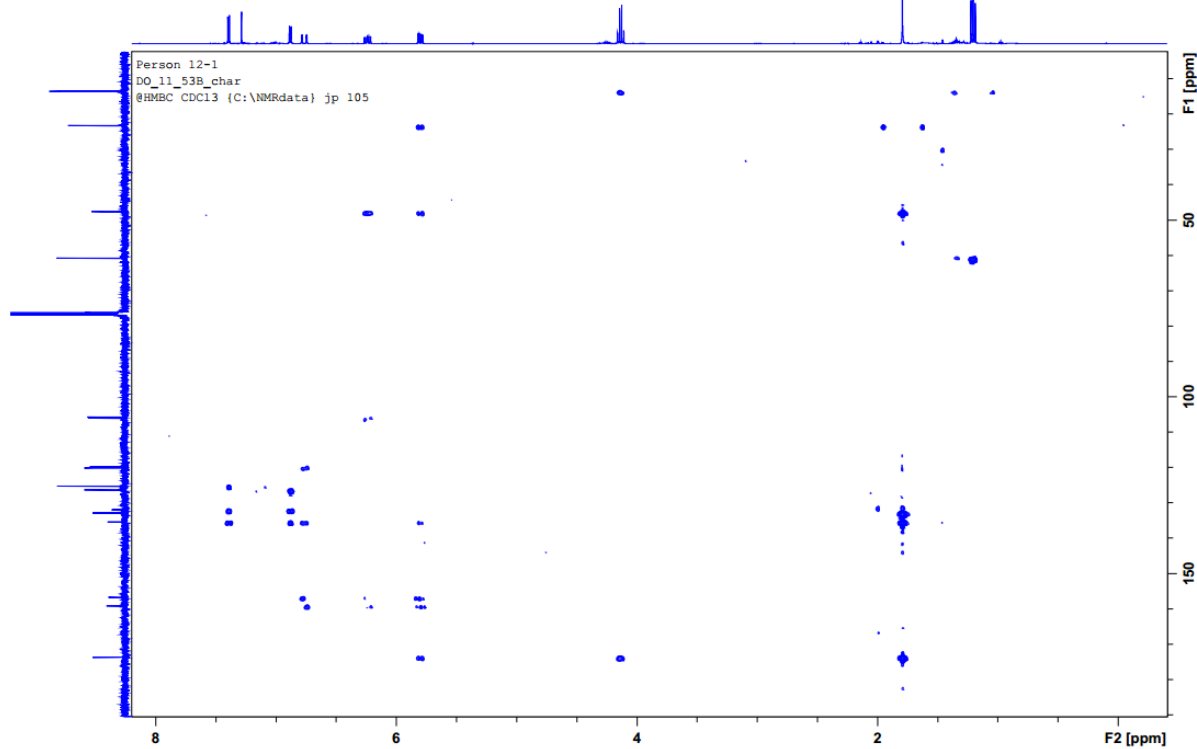

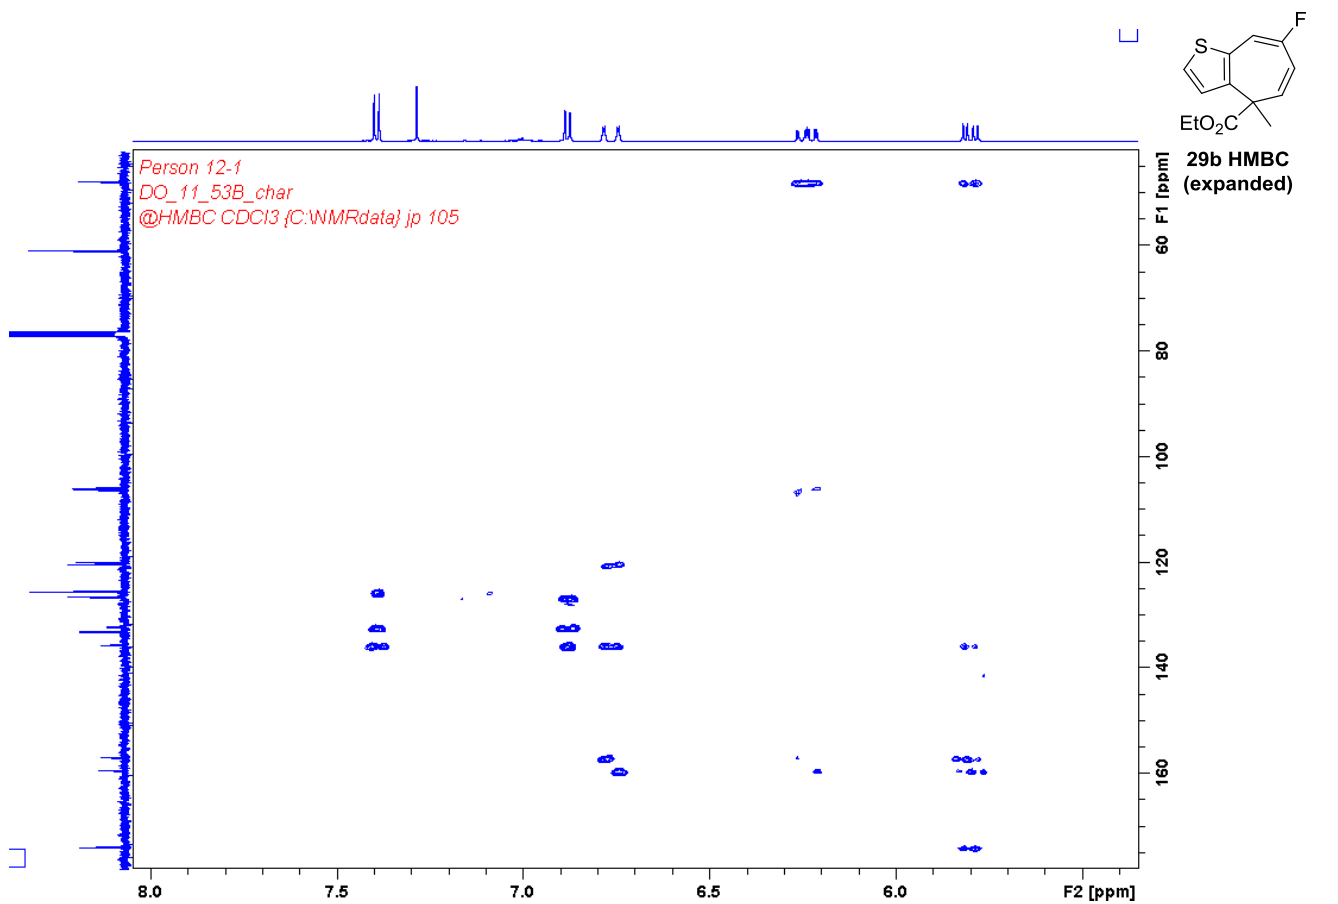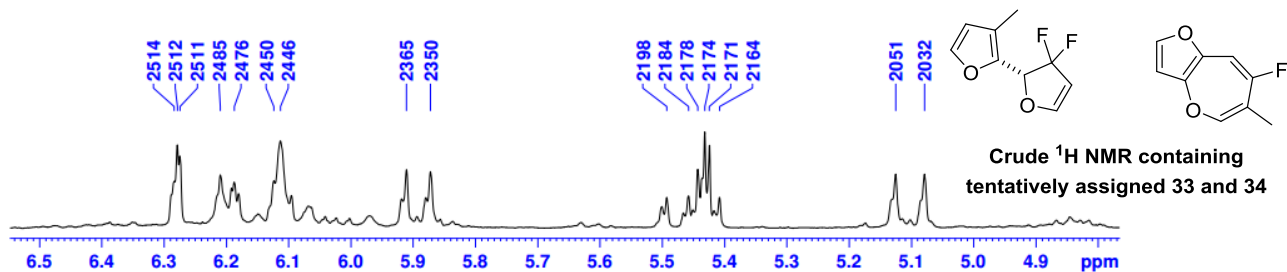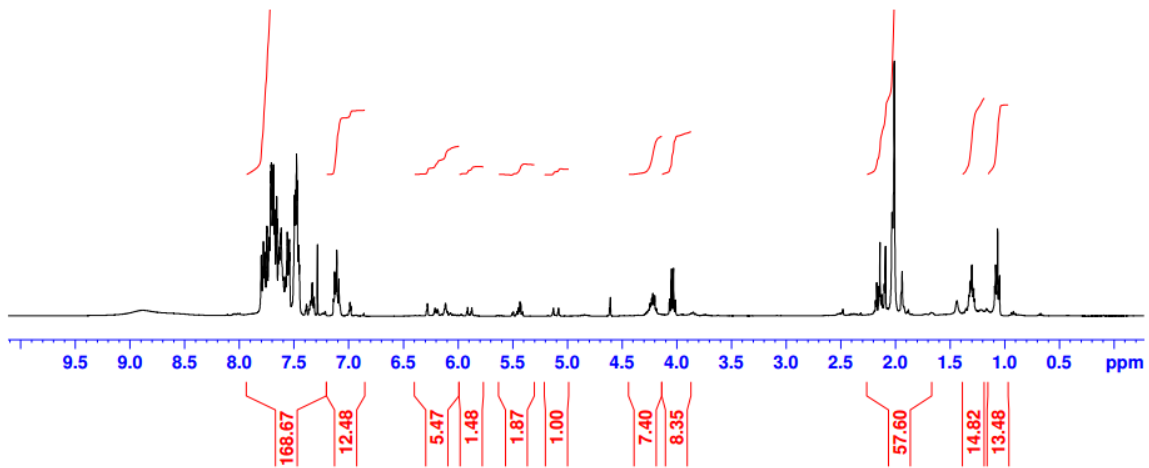

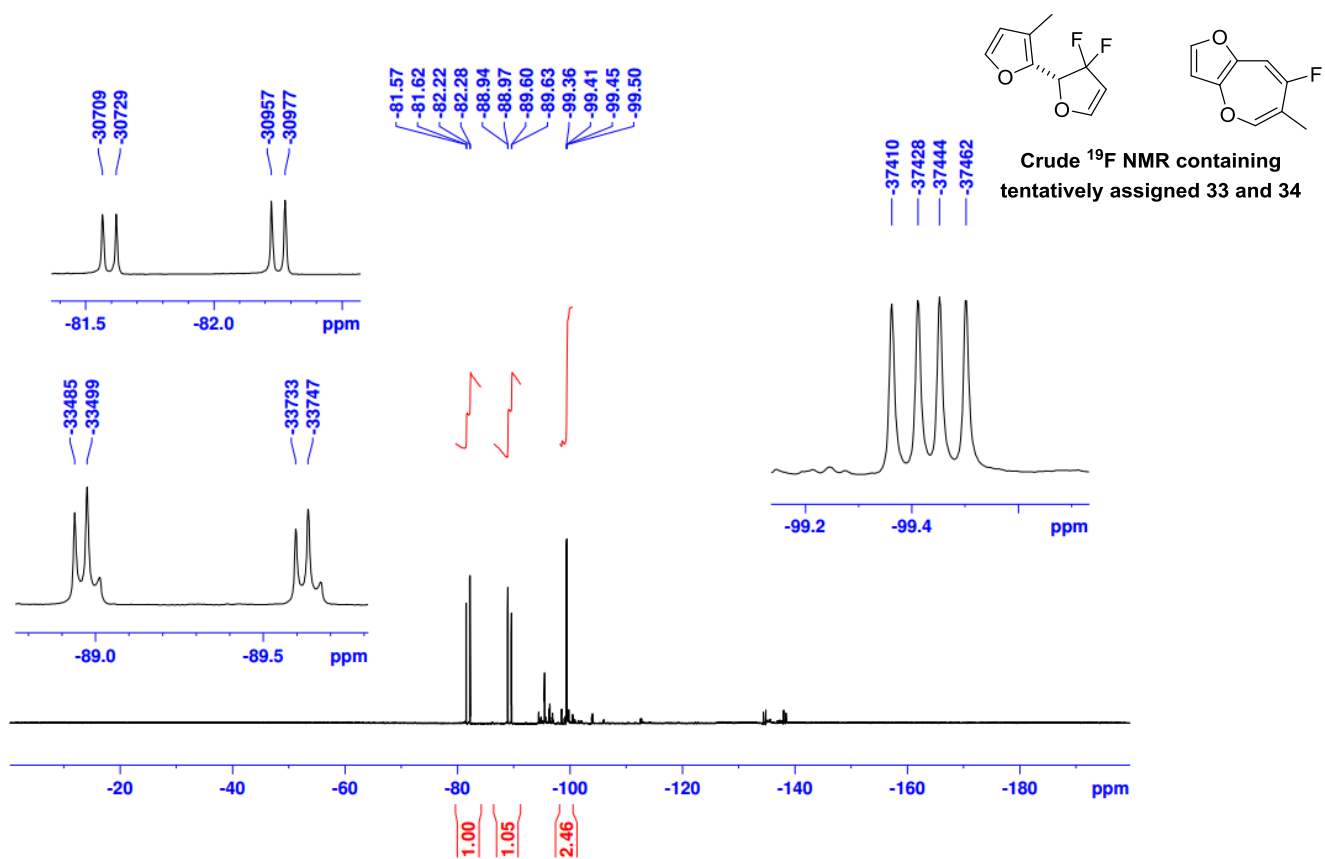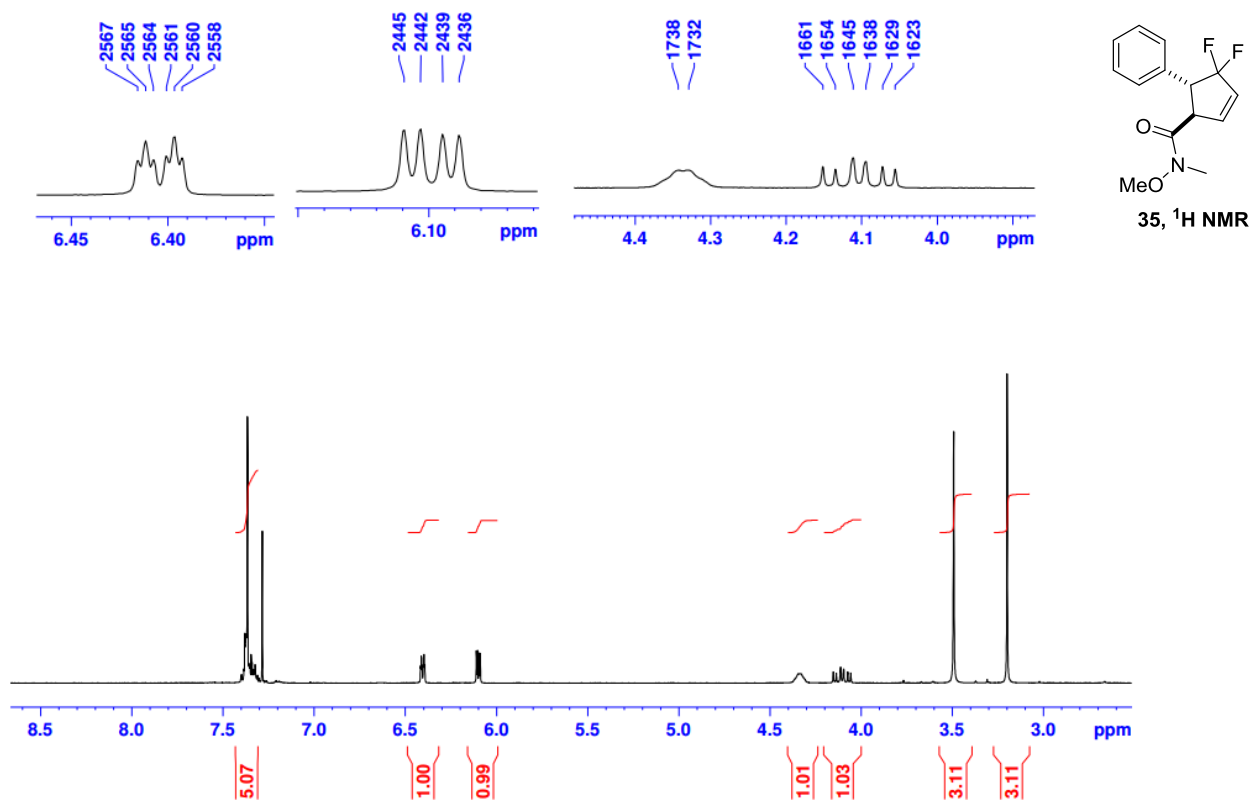

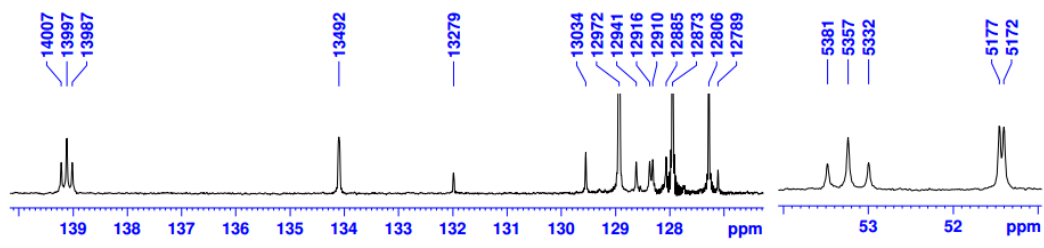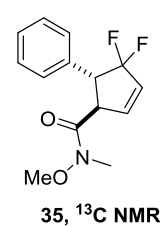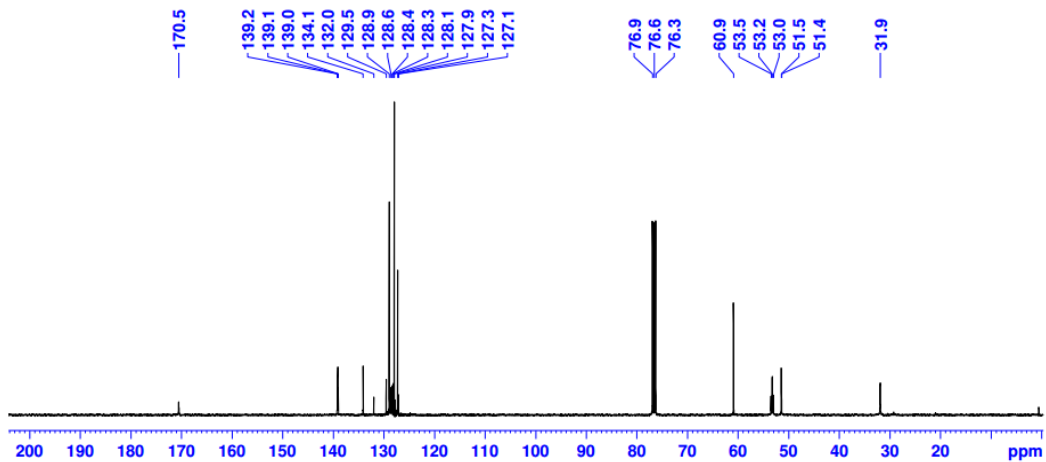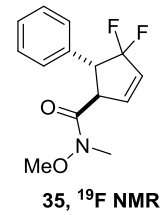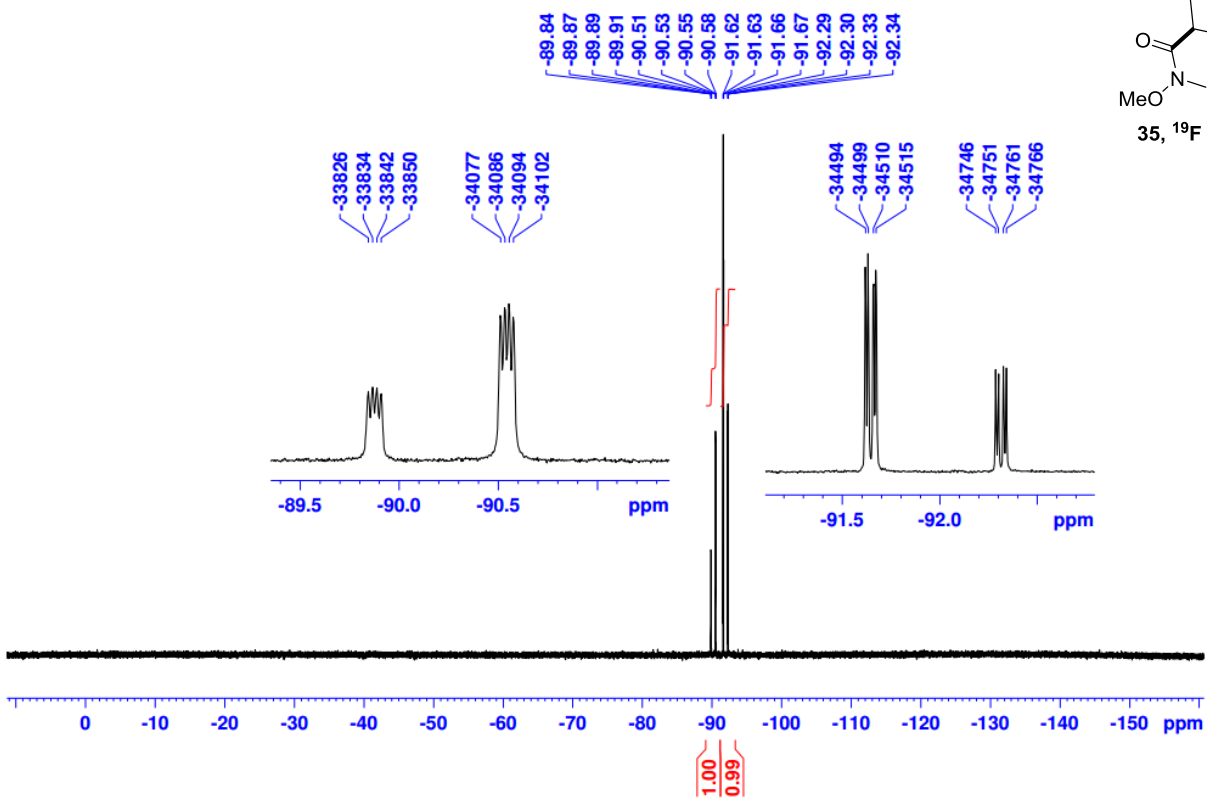



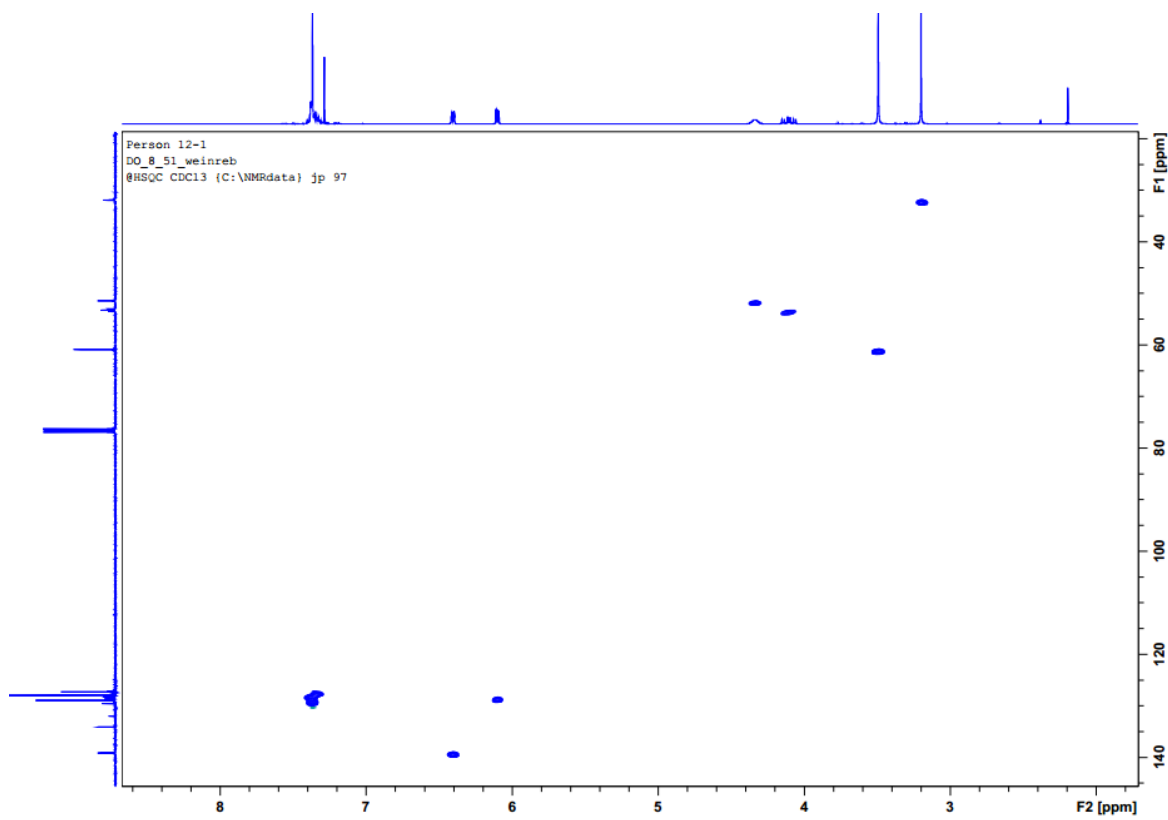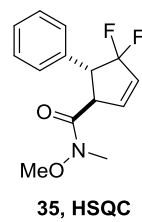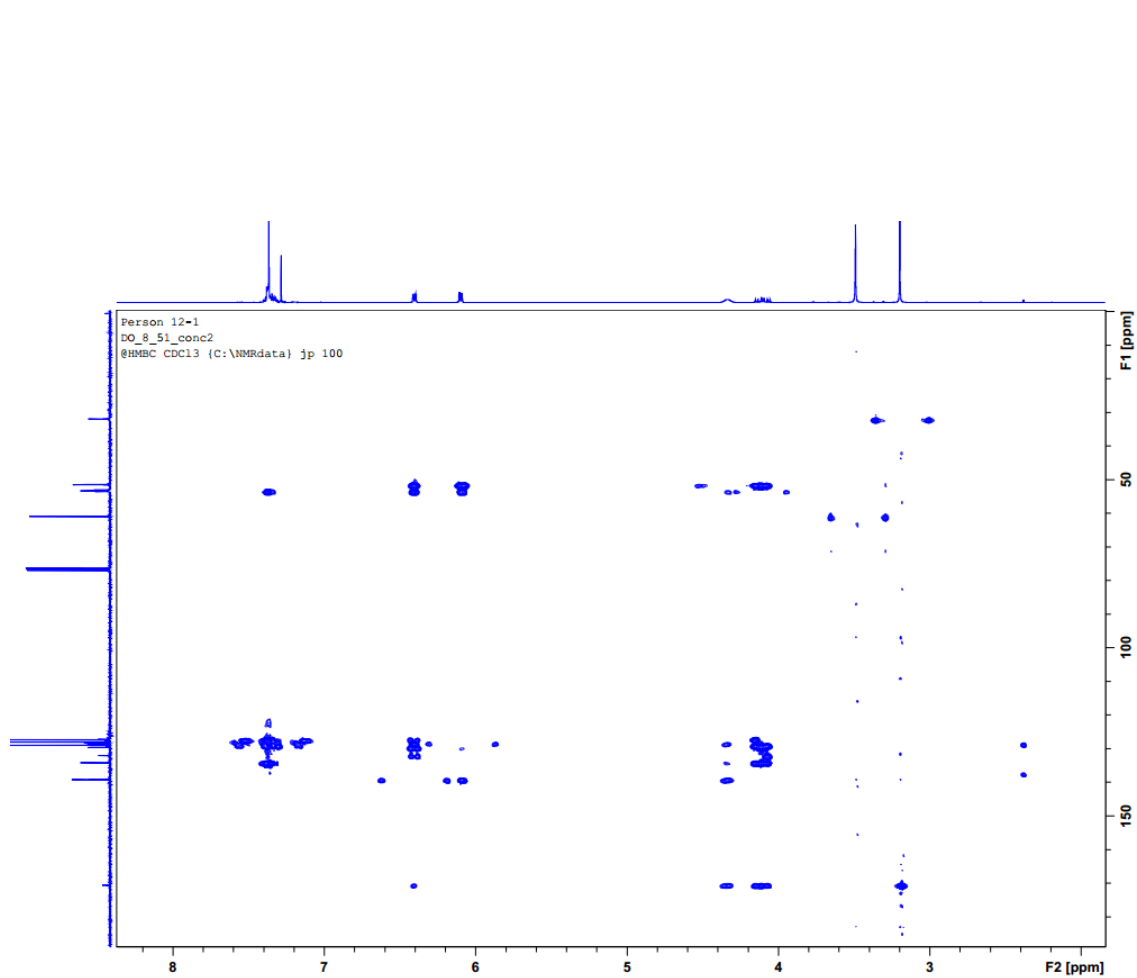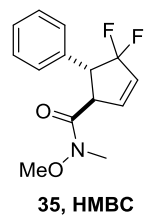

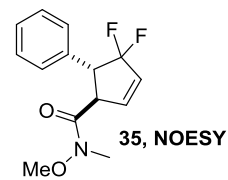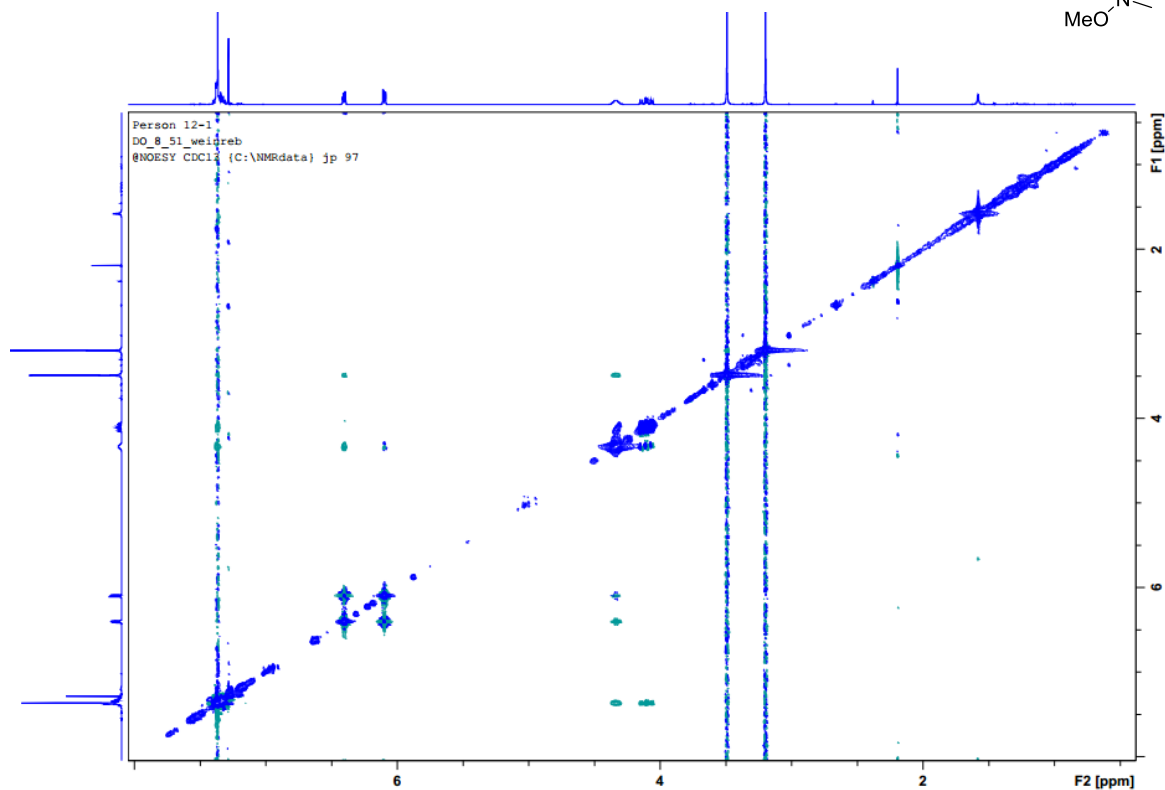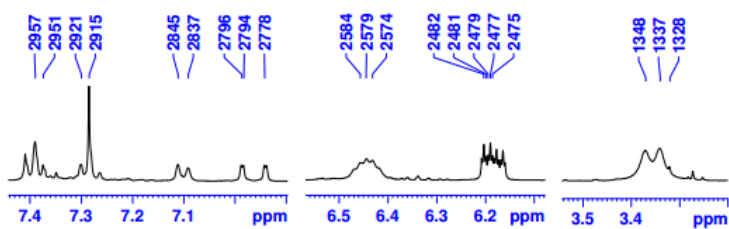

unknown, S10a  
<sup>1</sup>H NMR

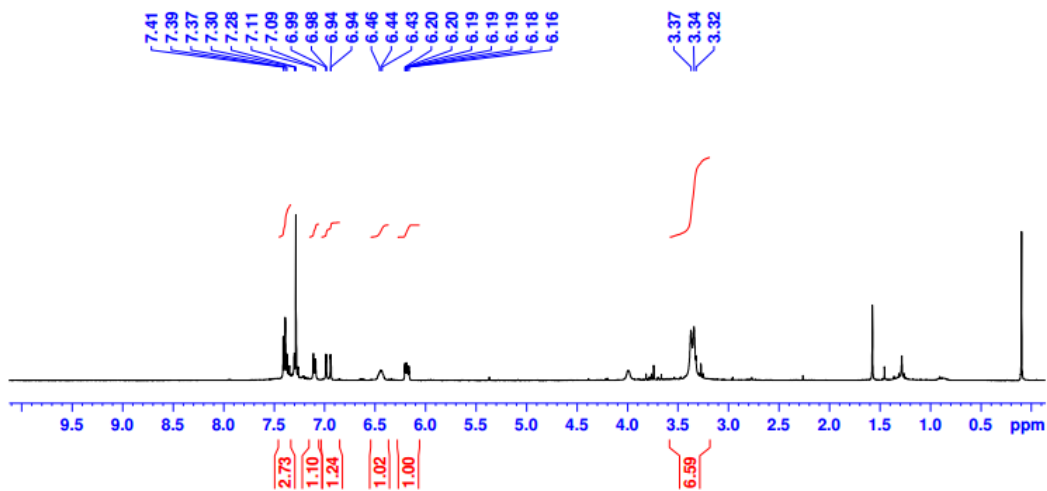

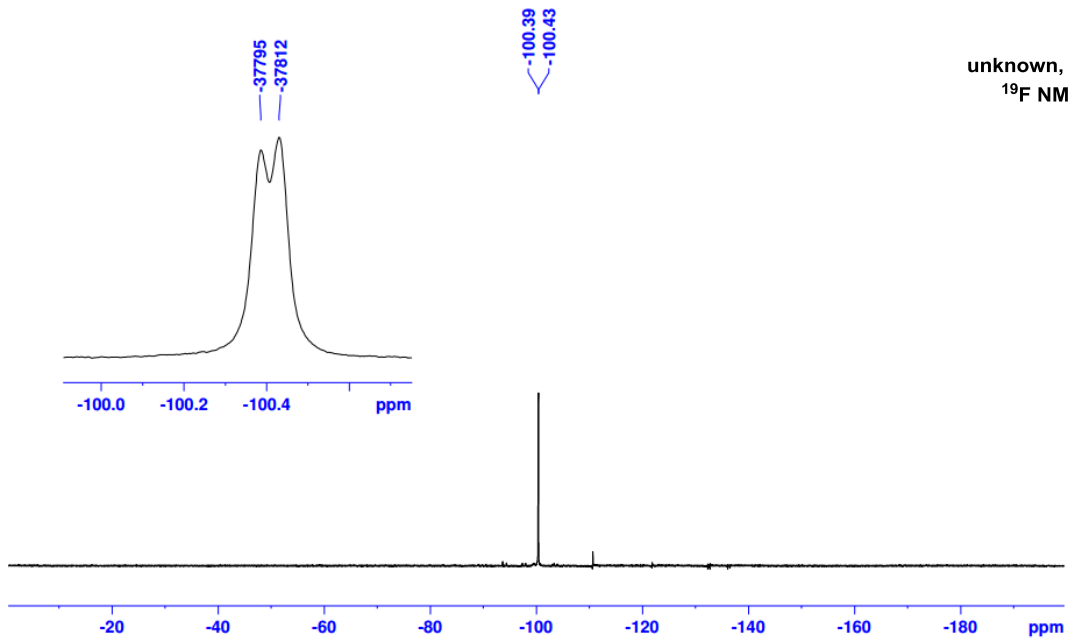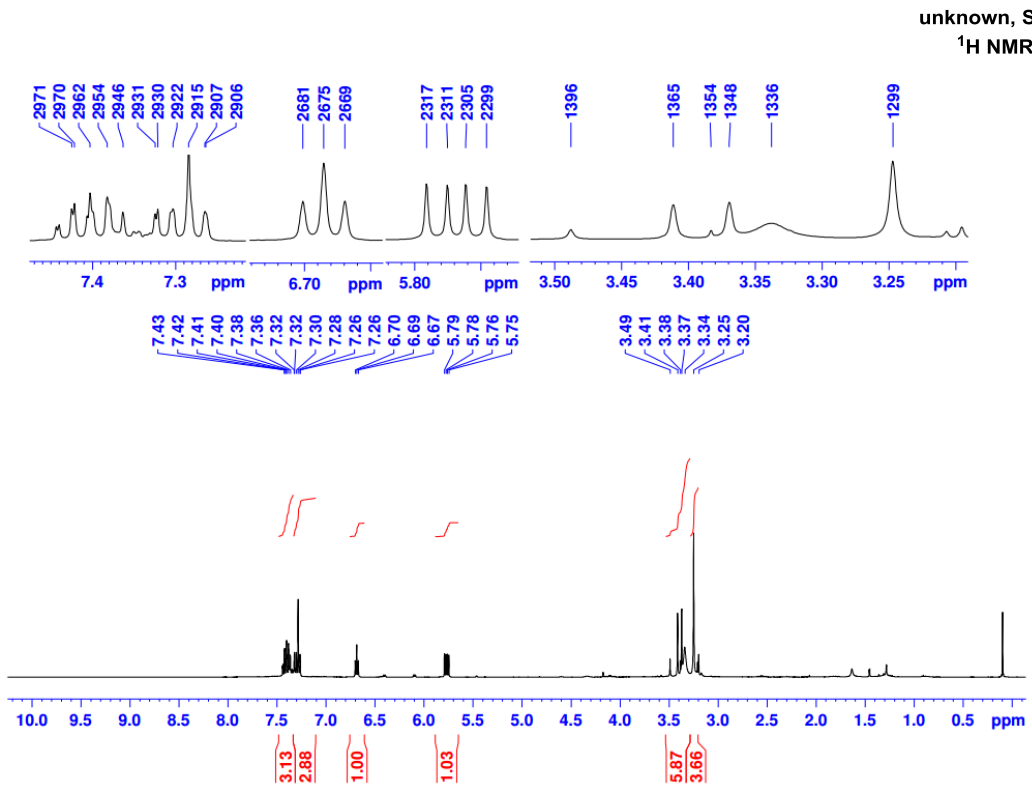



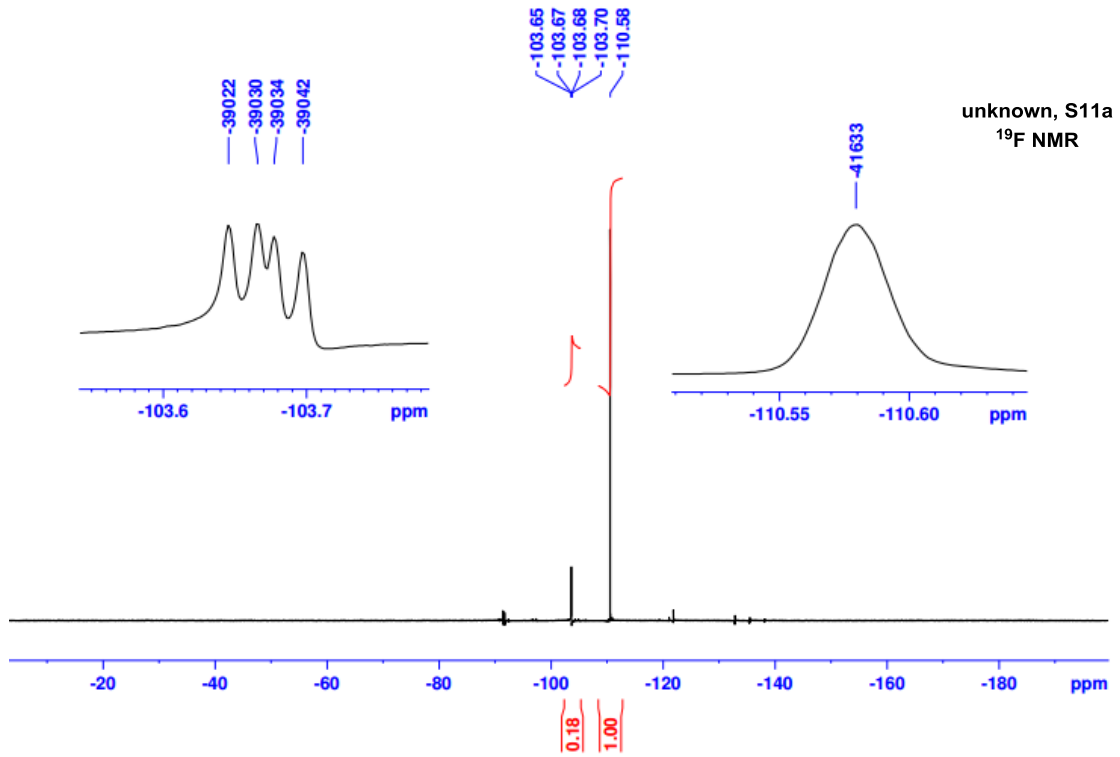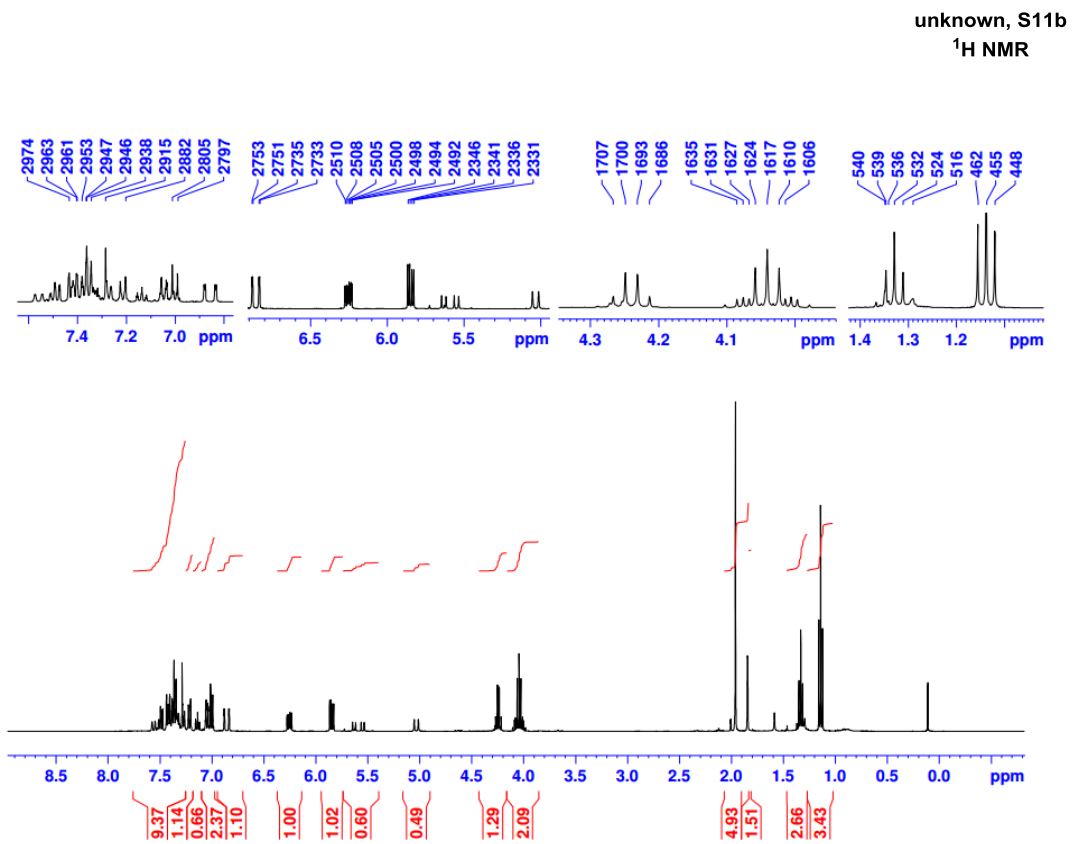

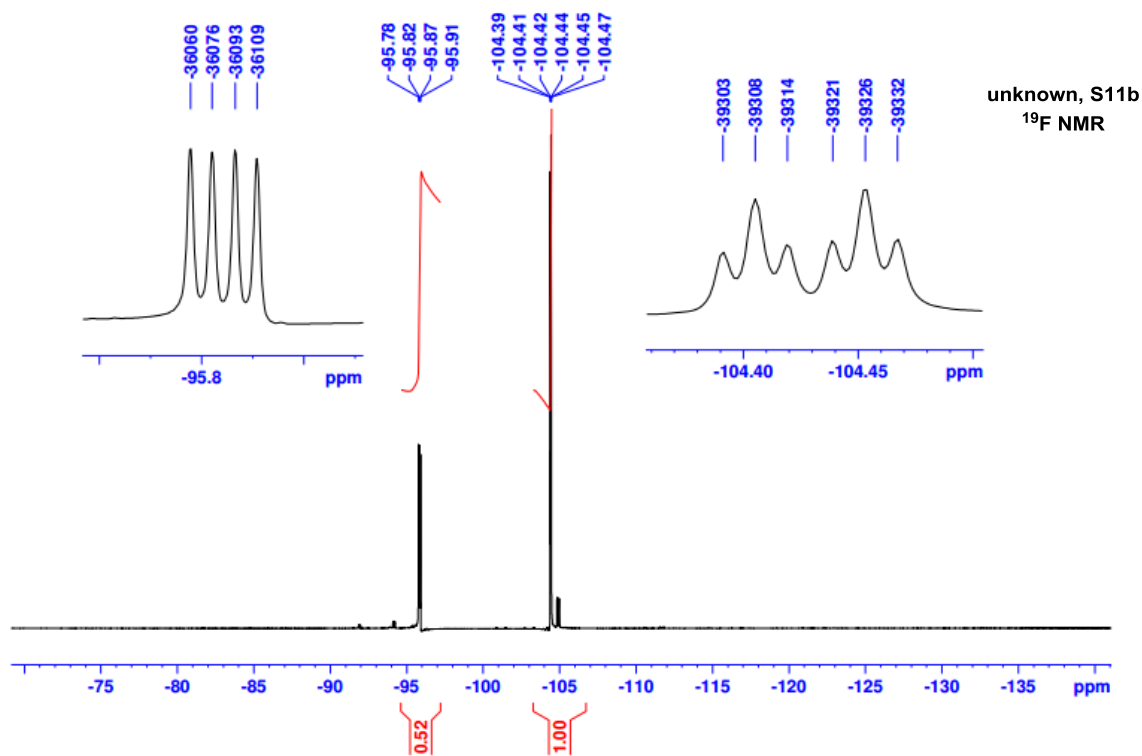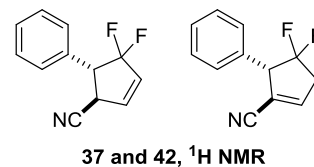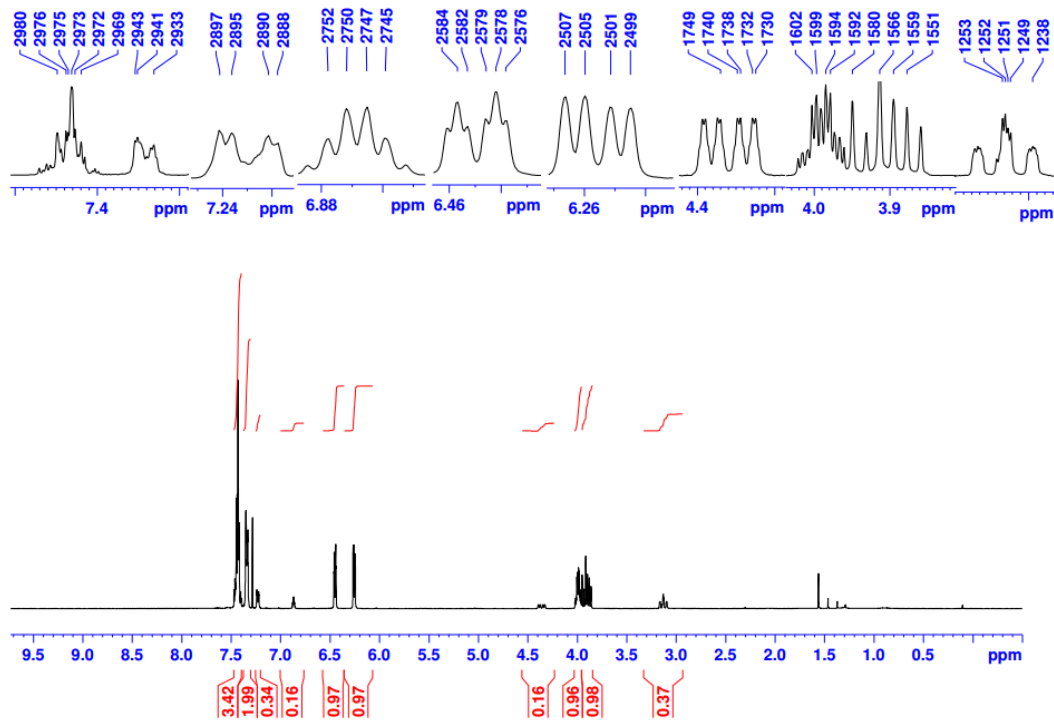

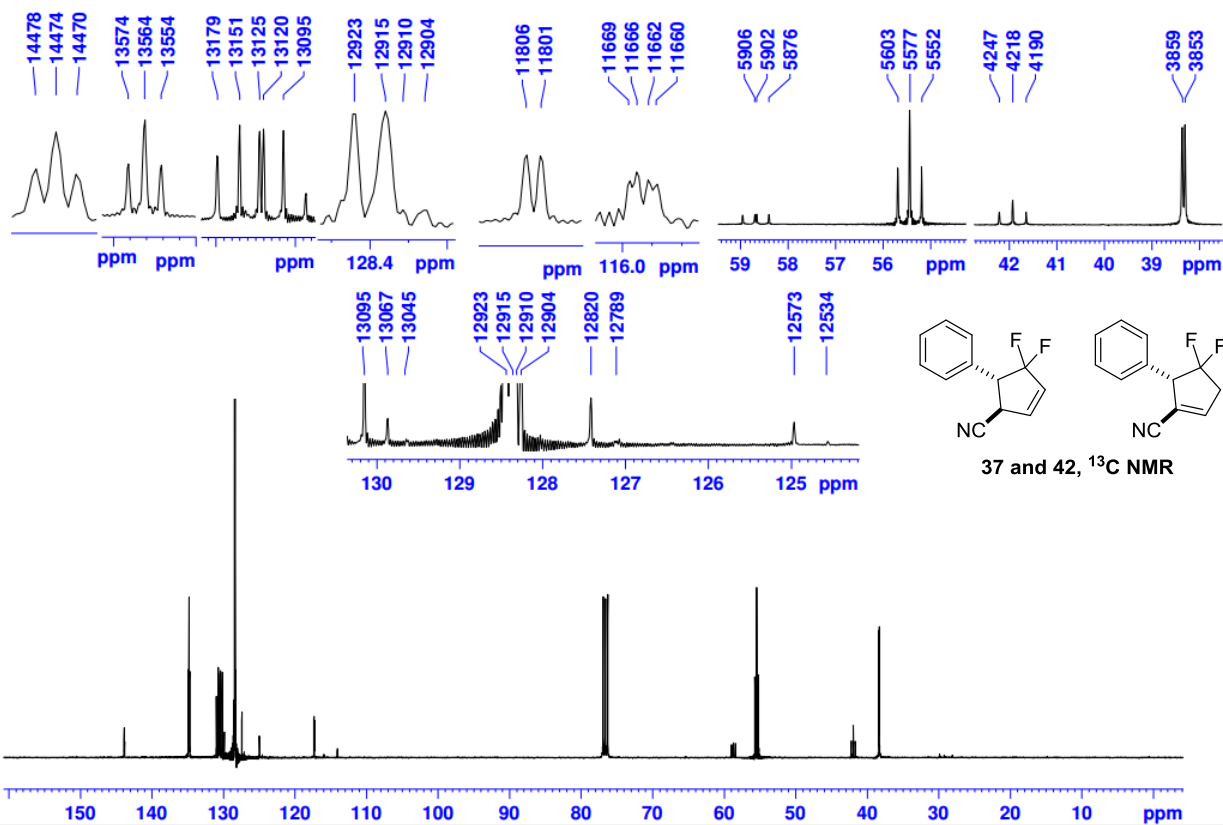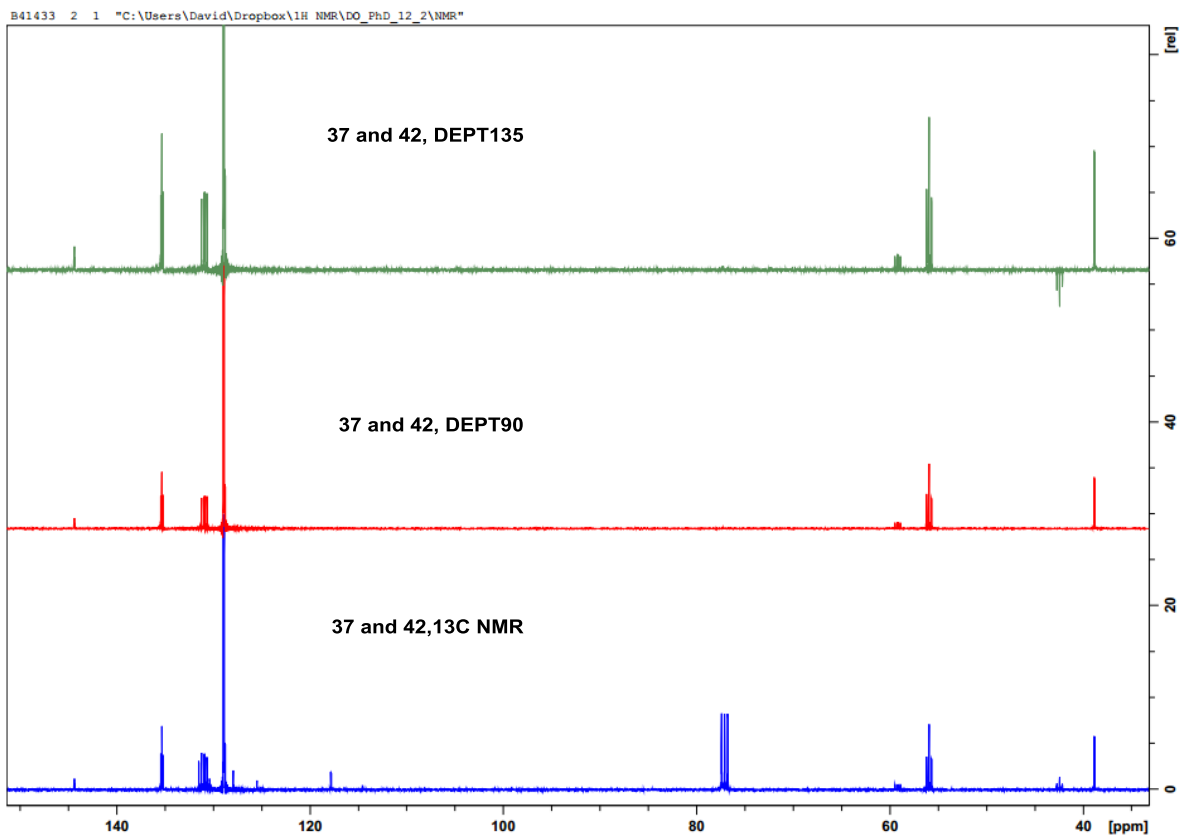

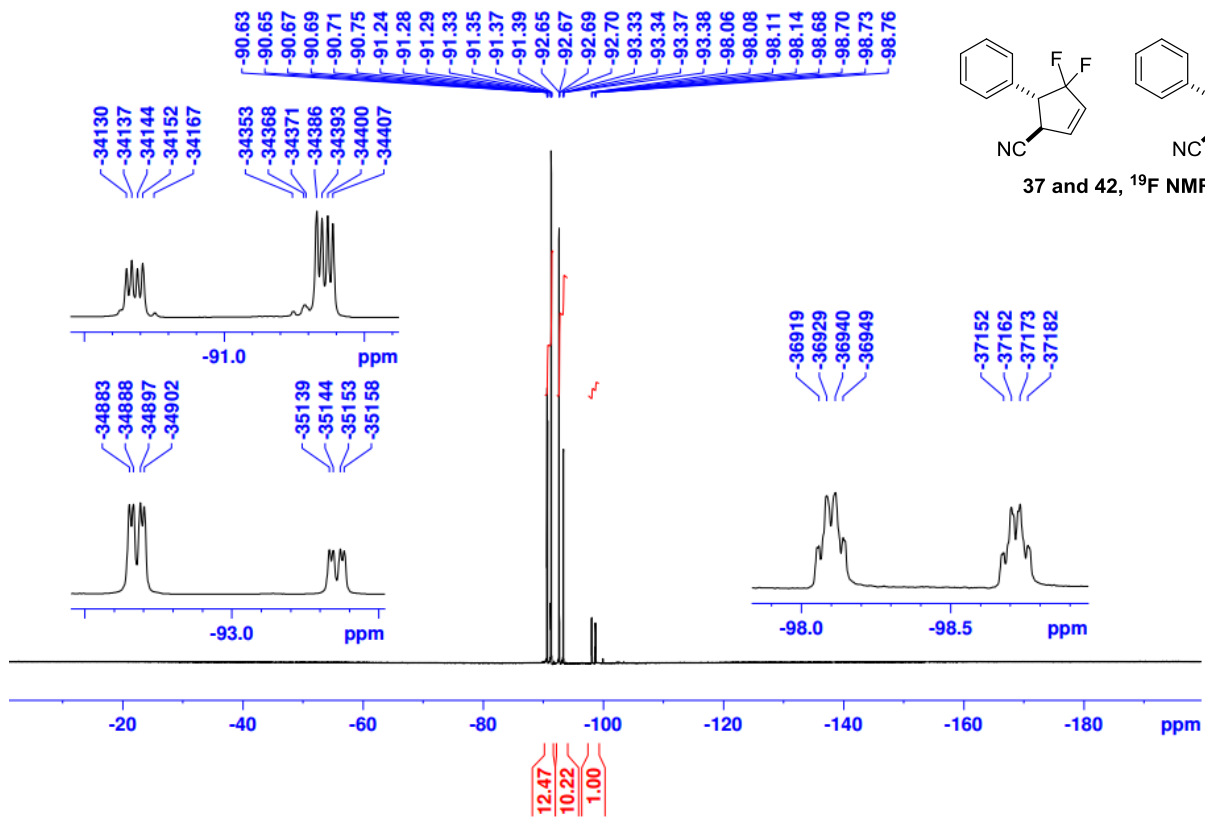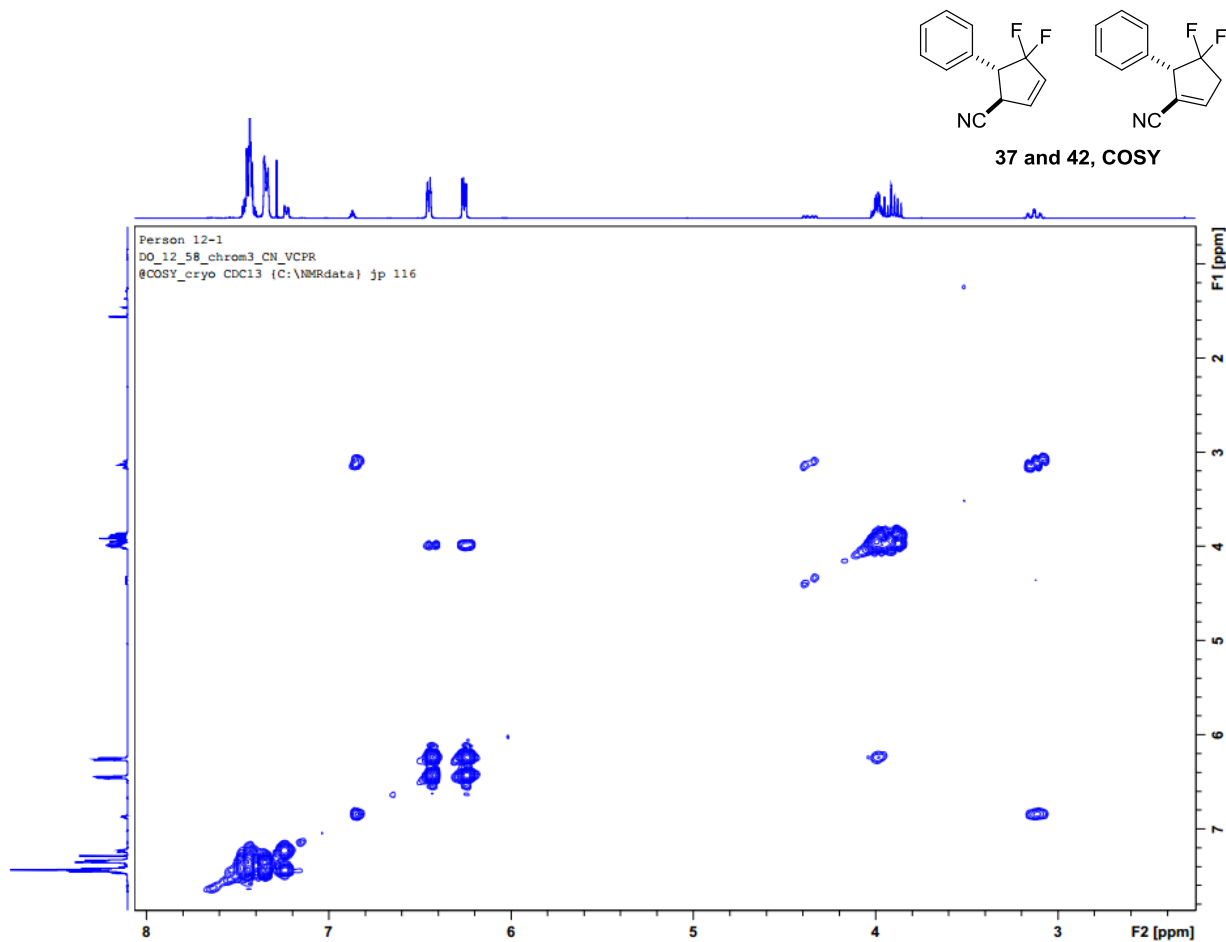



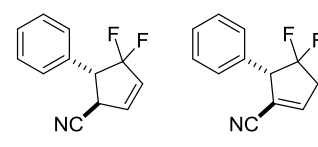

37 and 42, HSQC

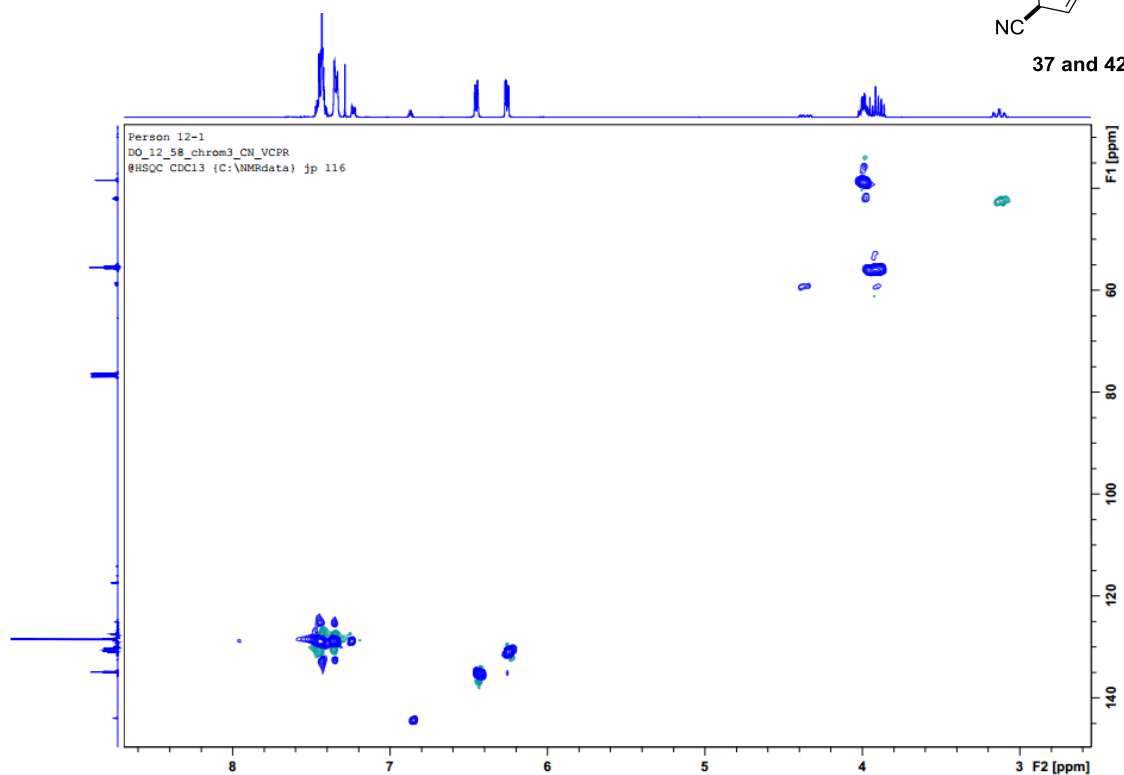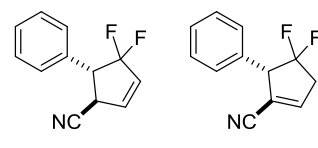

37 and 42, HMBC

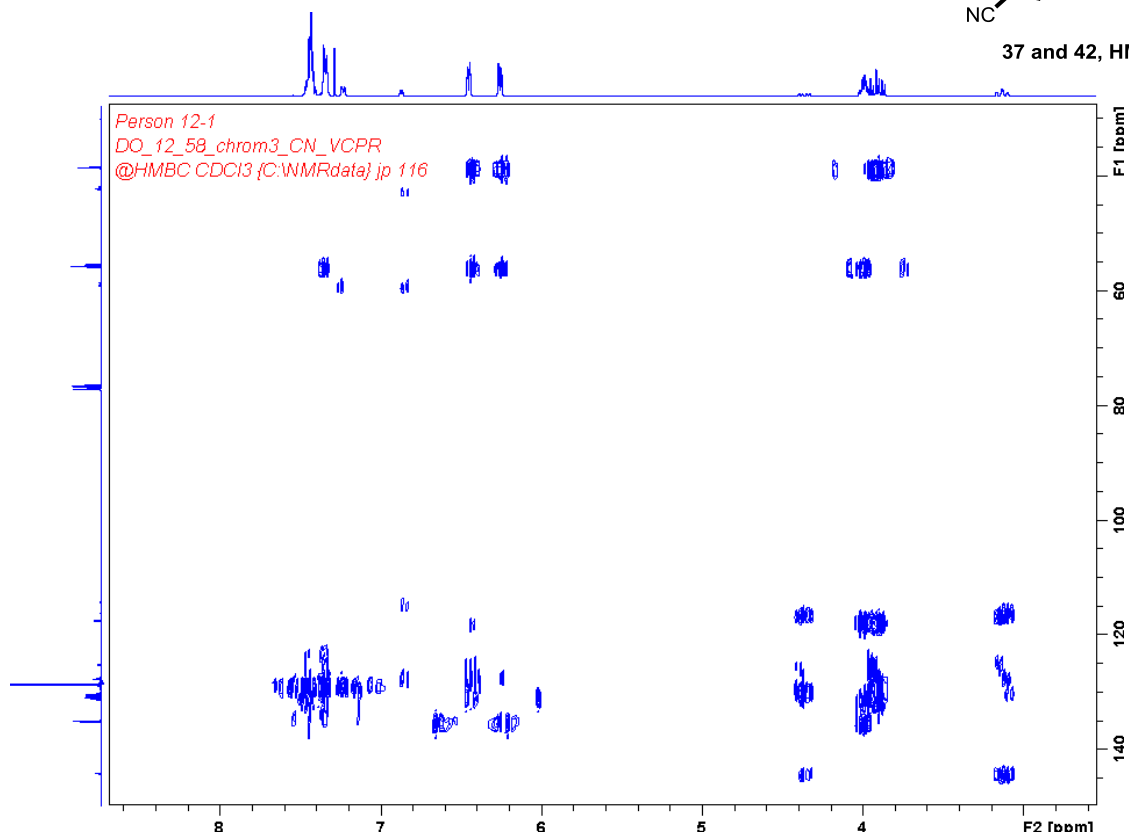

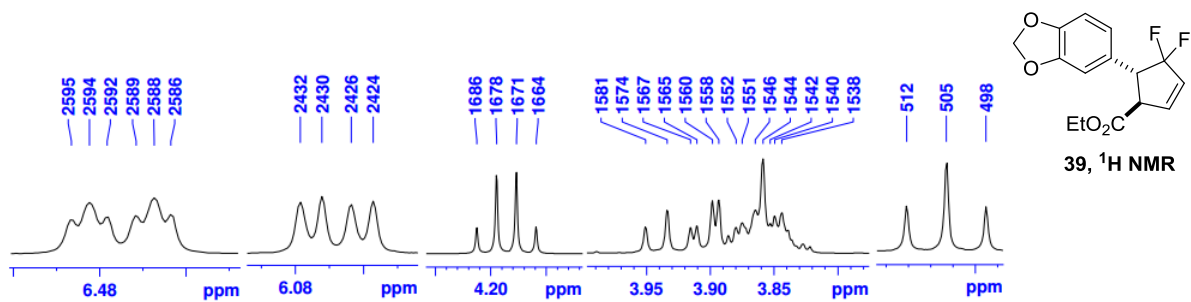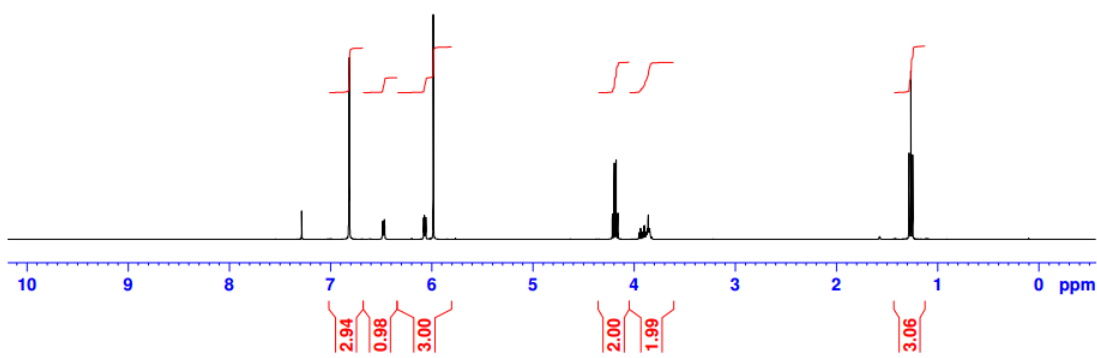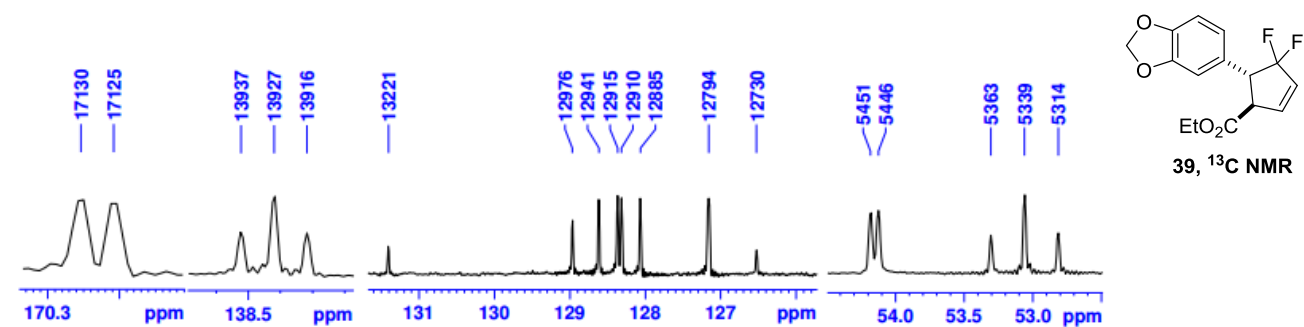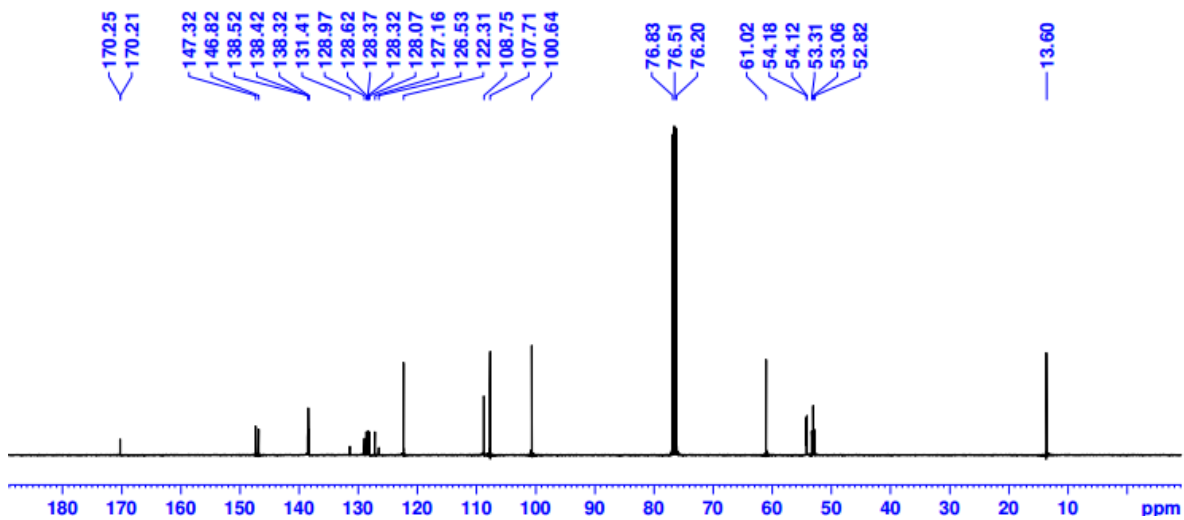

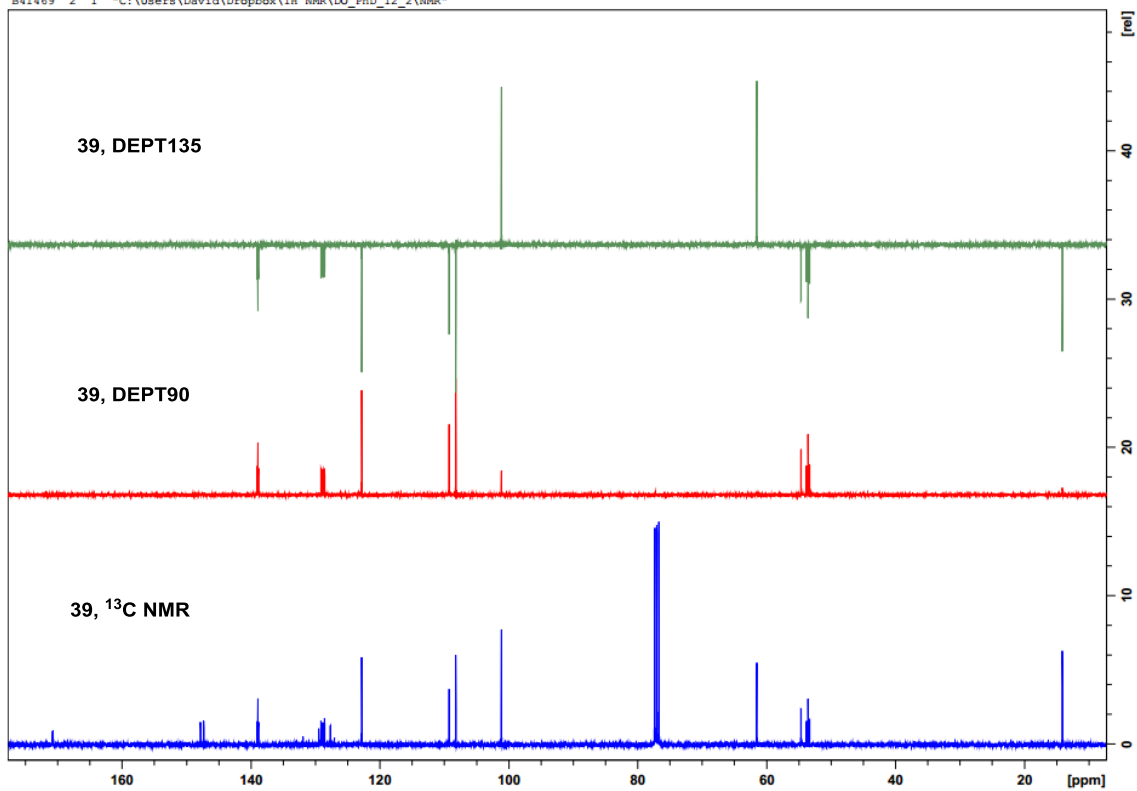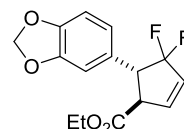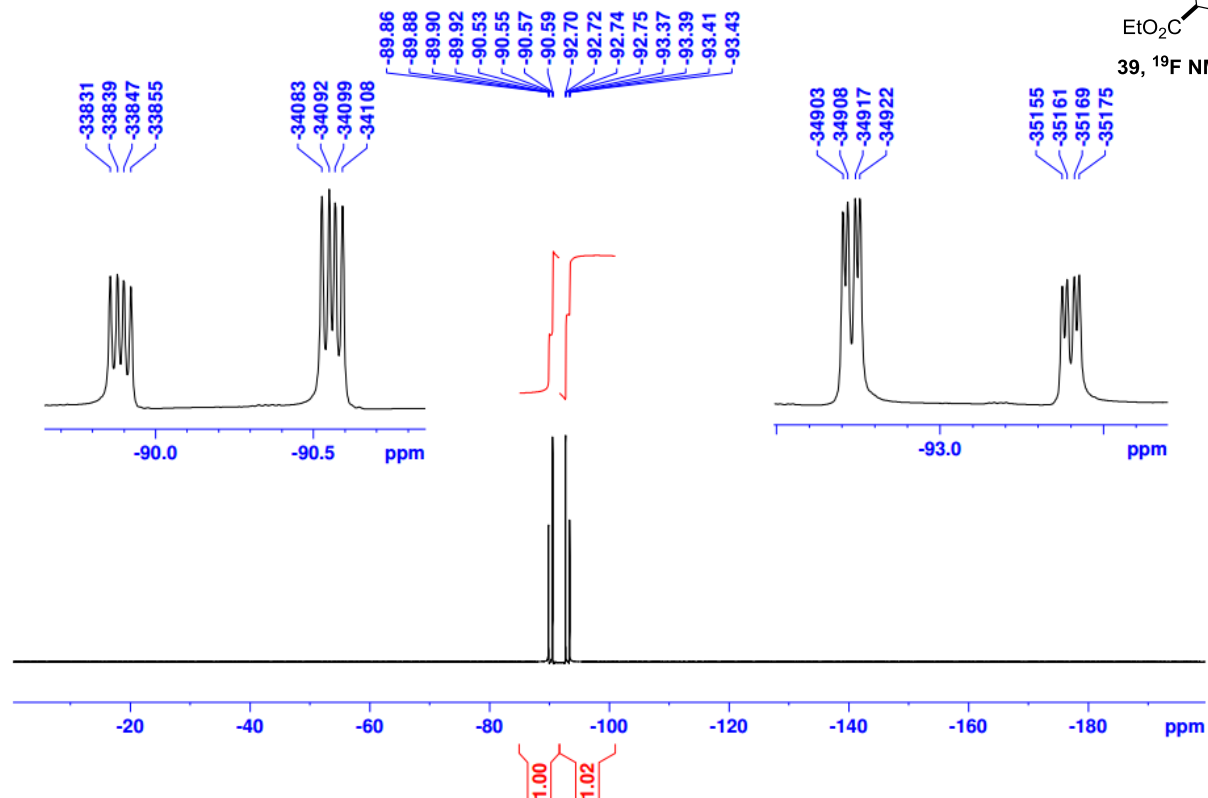

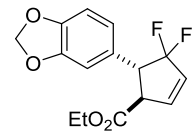

39, HSQC

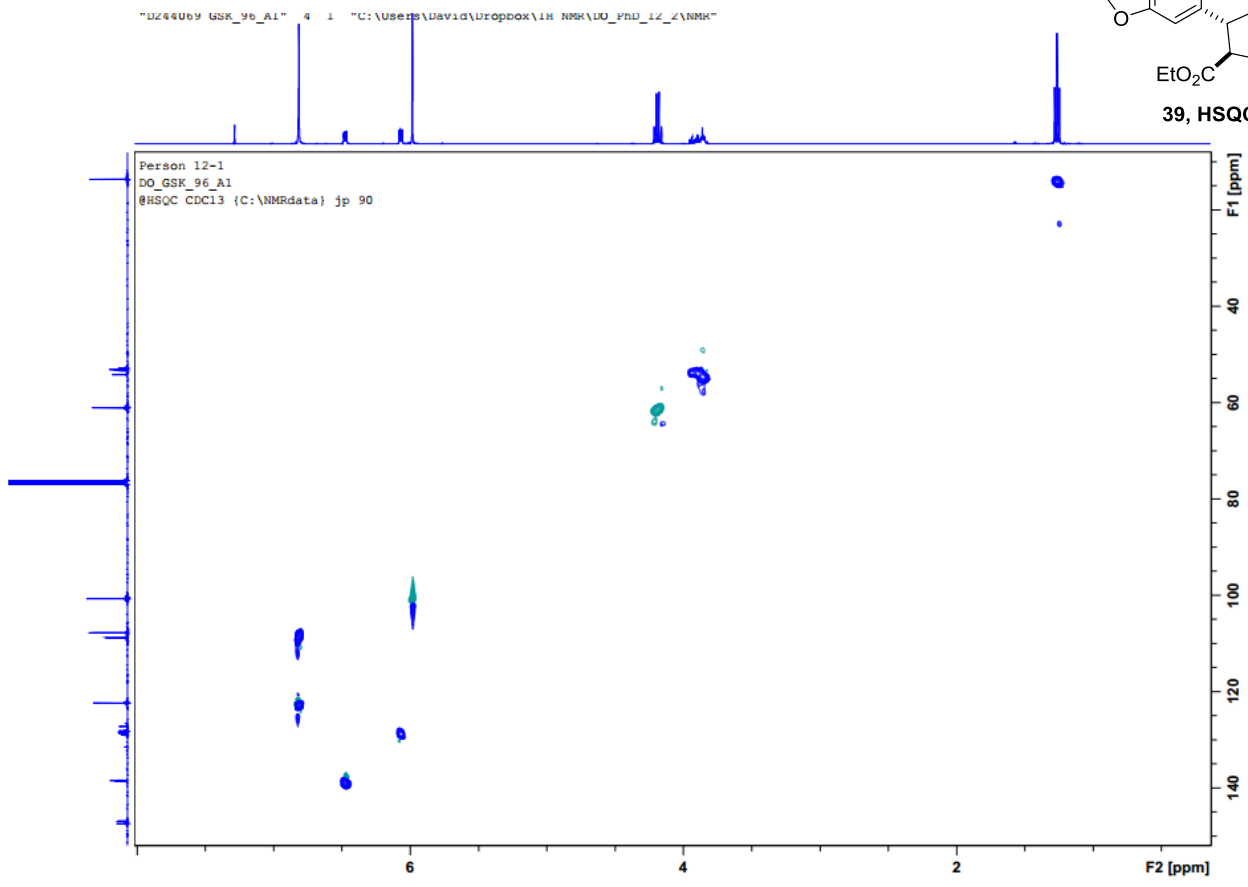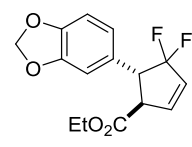

39, HMBC

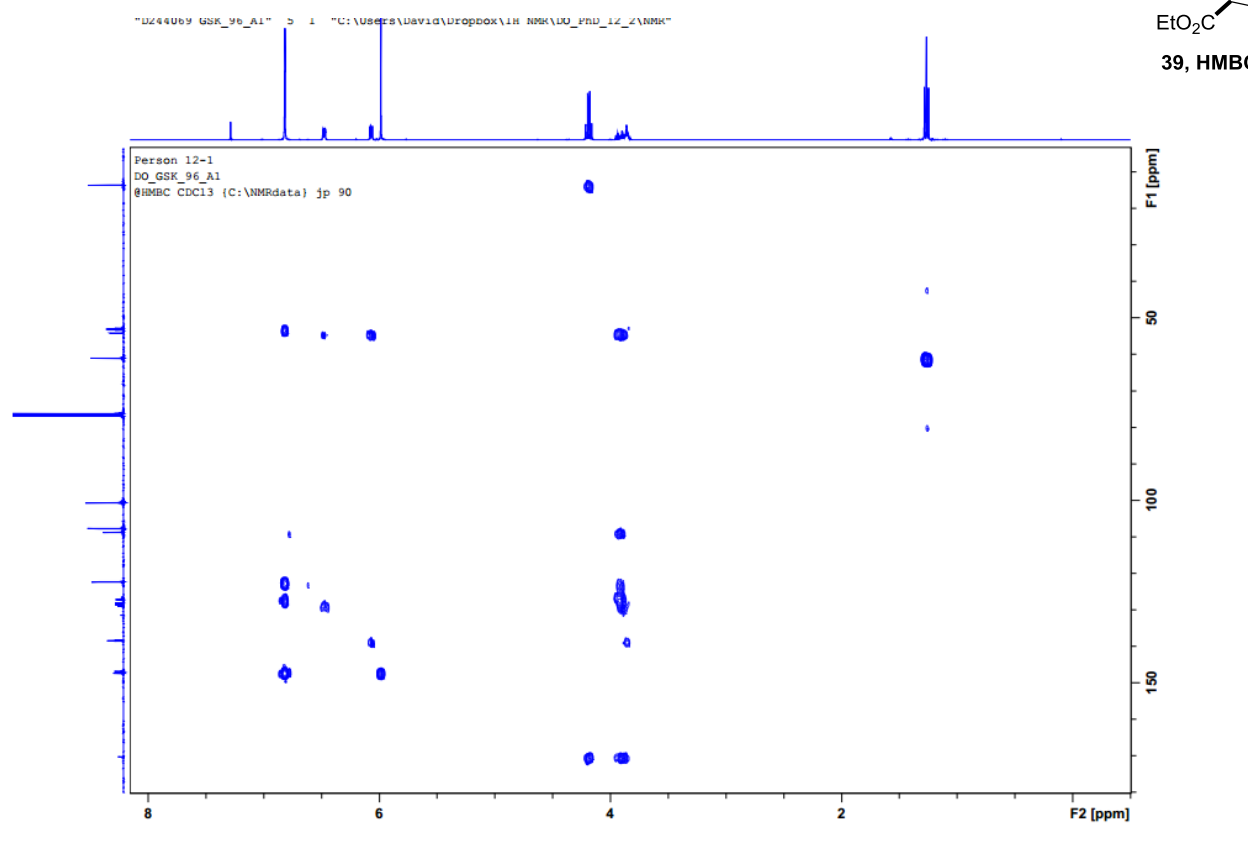

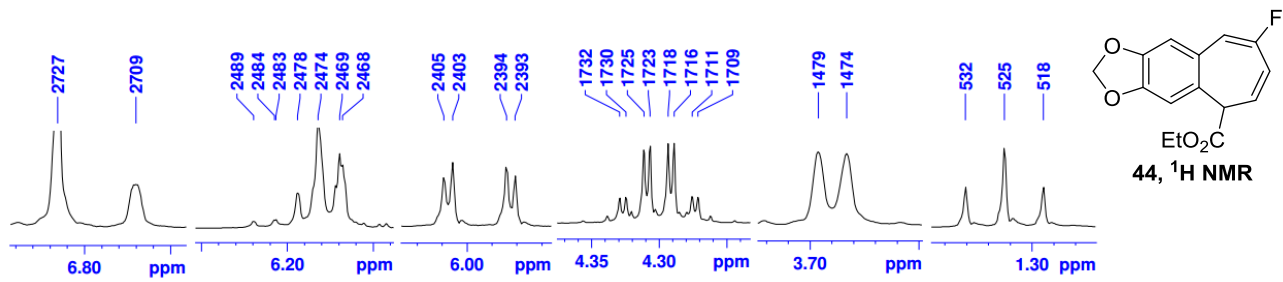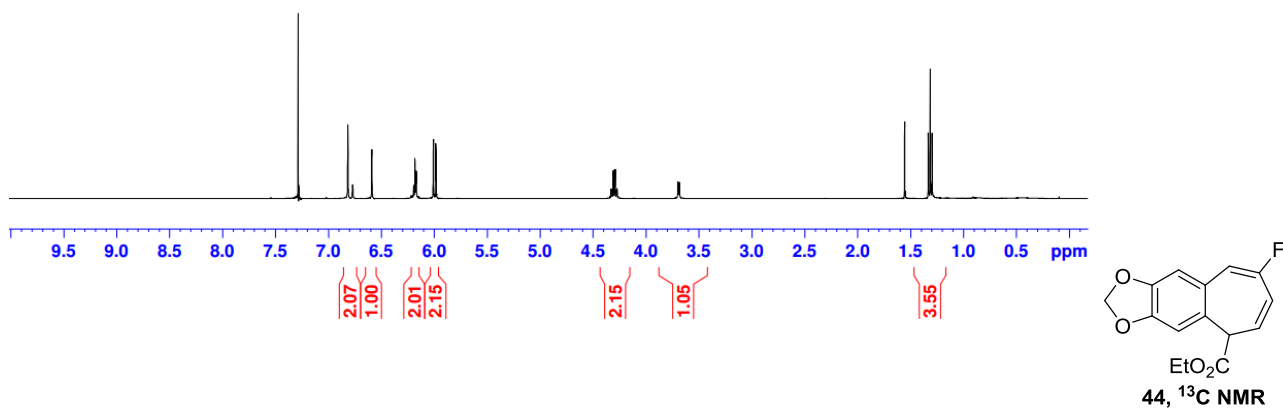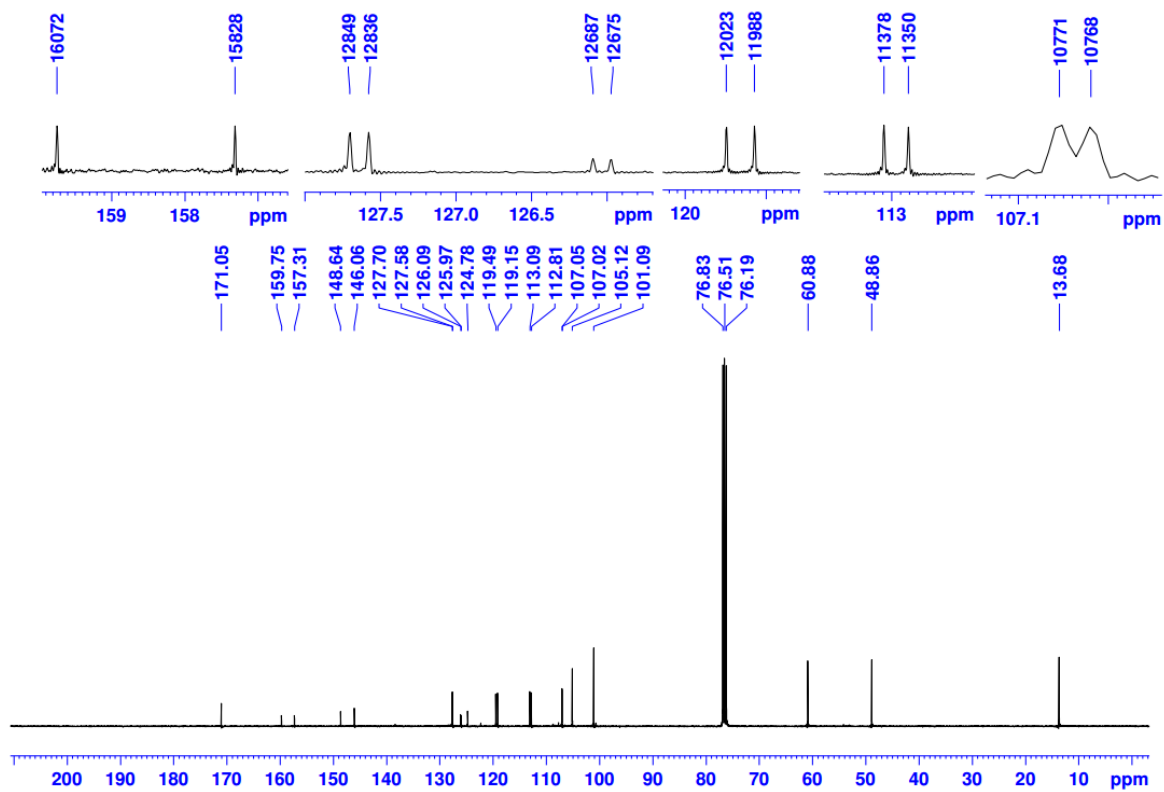

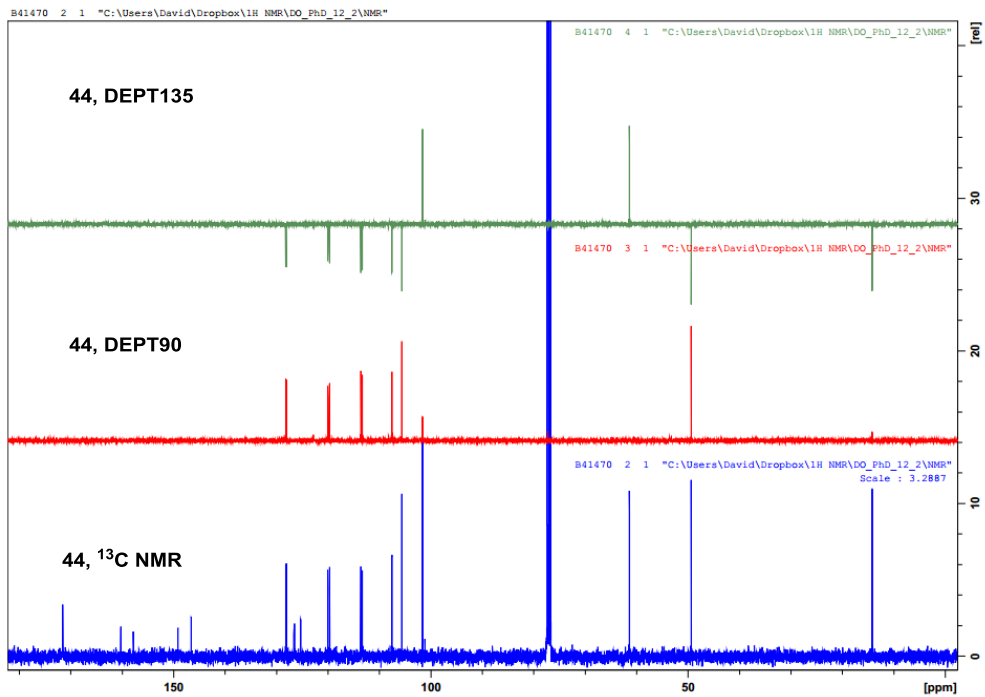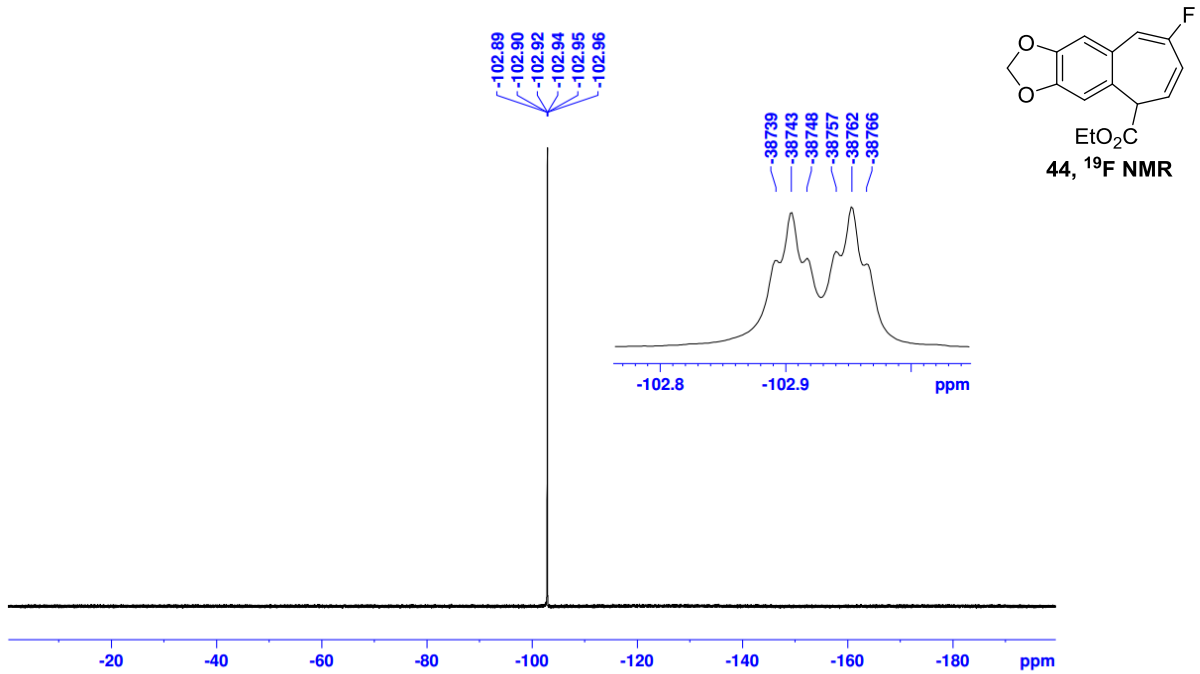

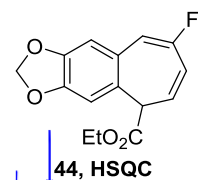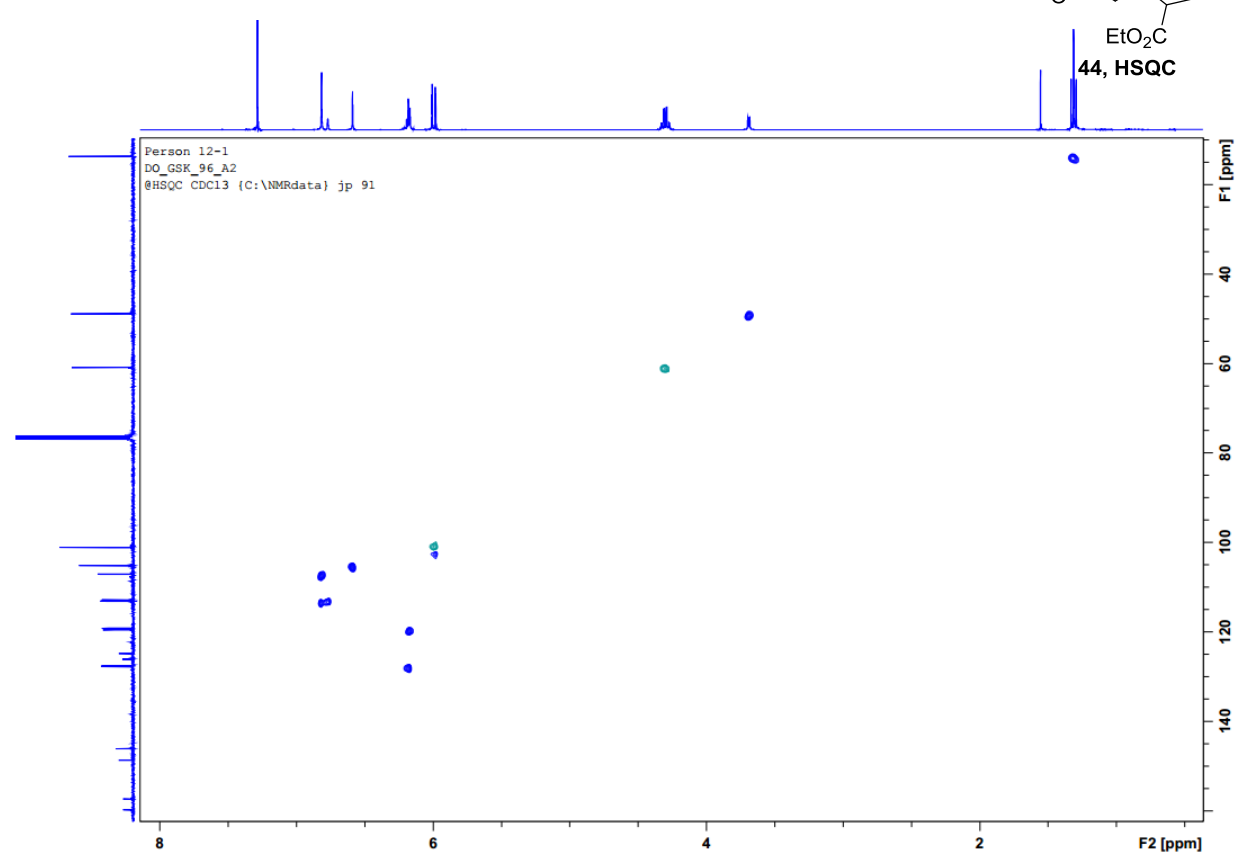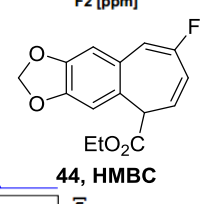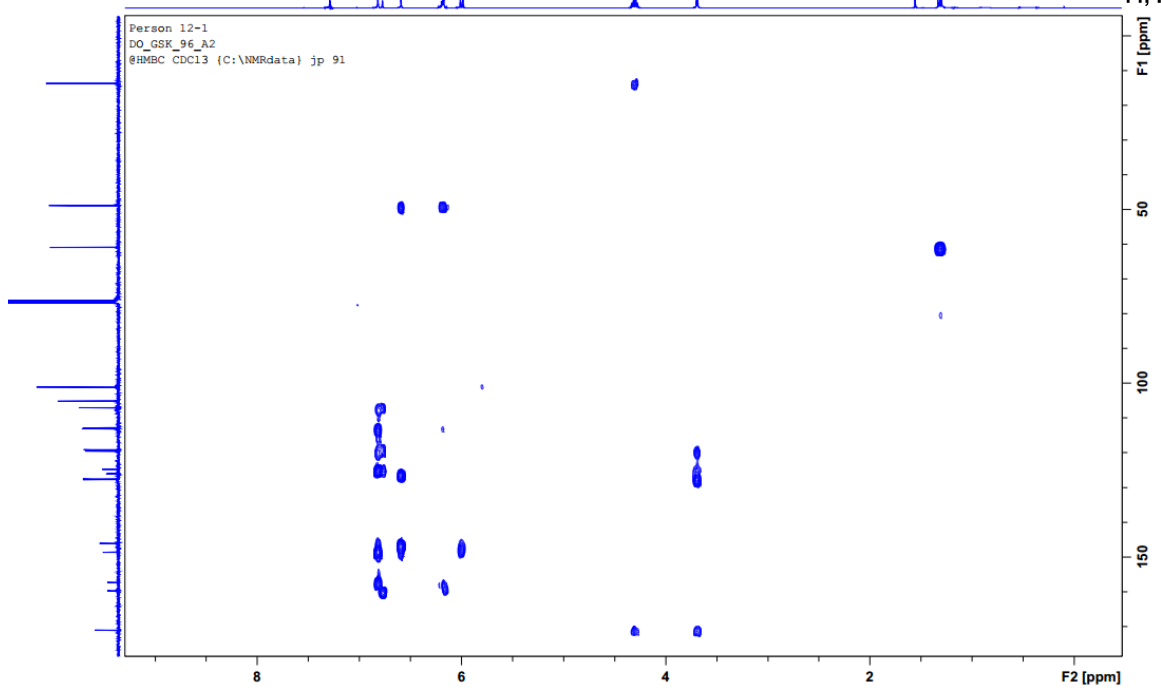

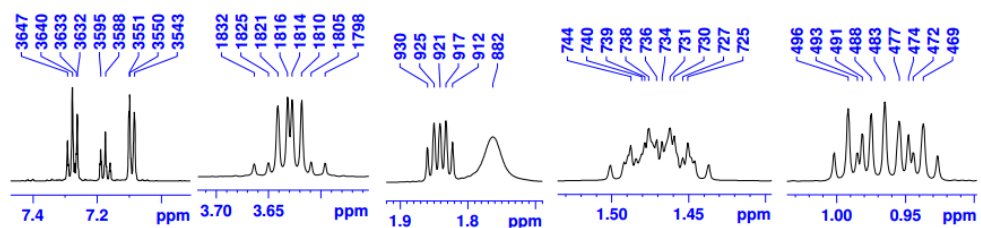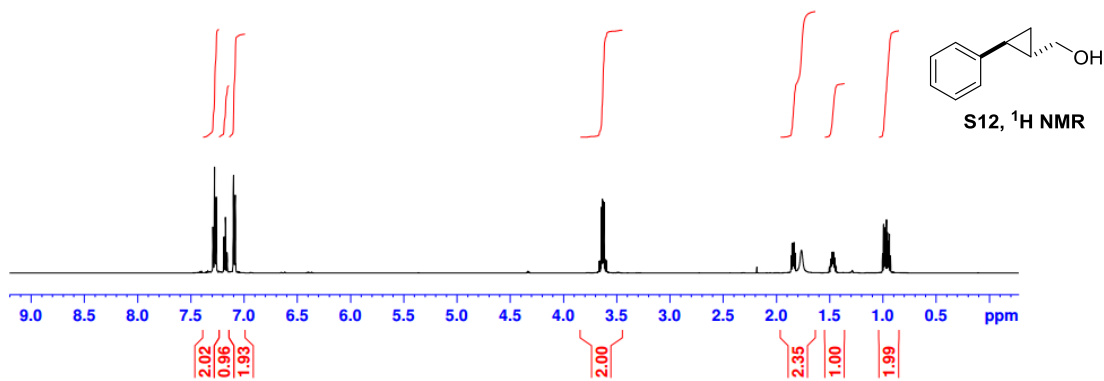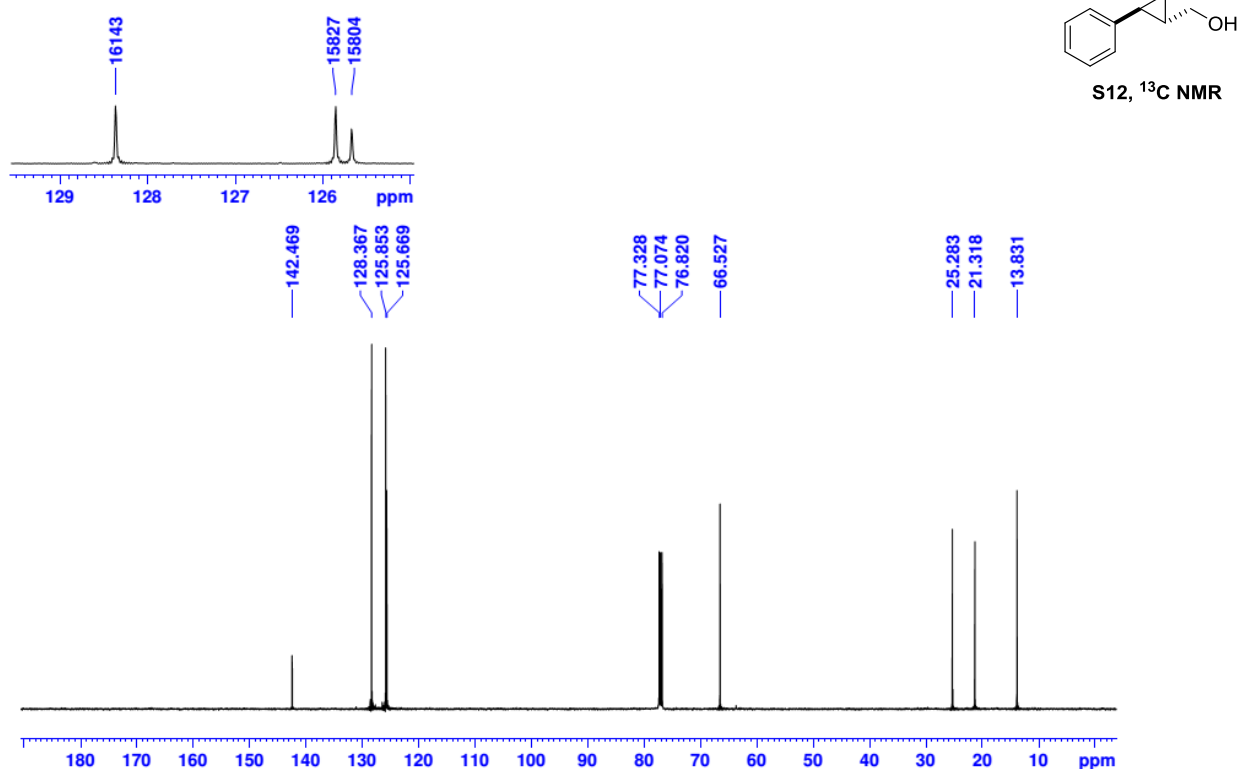



"A40195 40 char" 3 1 "C:\Users\David\Dropbox\1H NMR\DO\_PhD\_9\NMR"

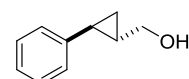

S12, HSQC

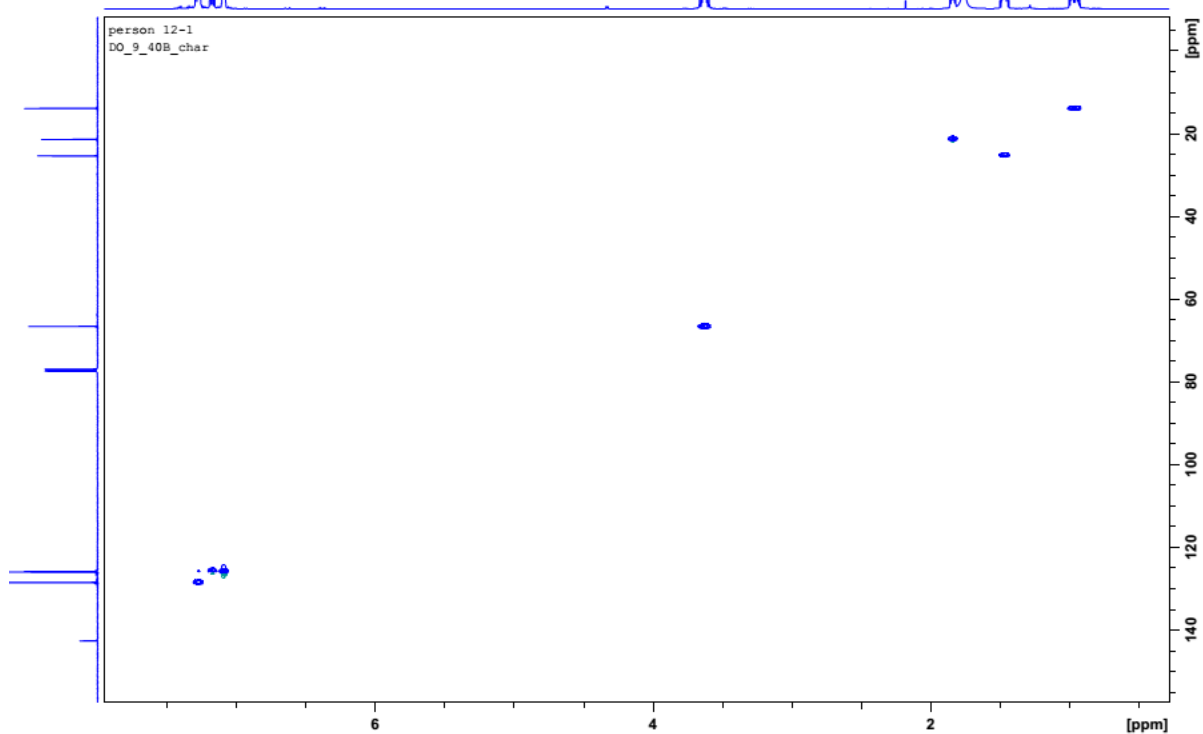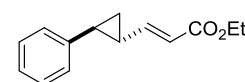

47, <sup>1</sup>H NMR

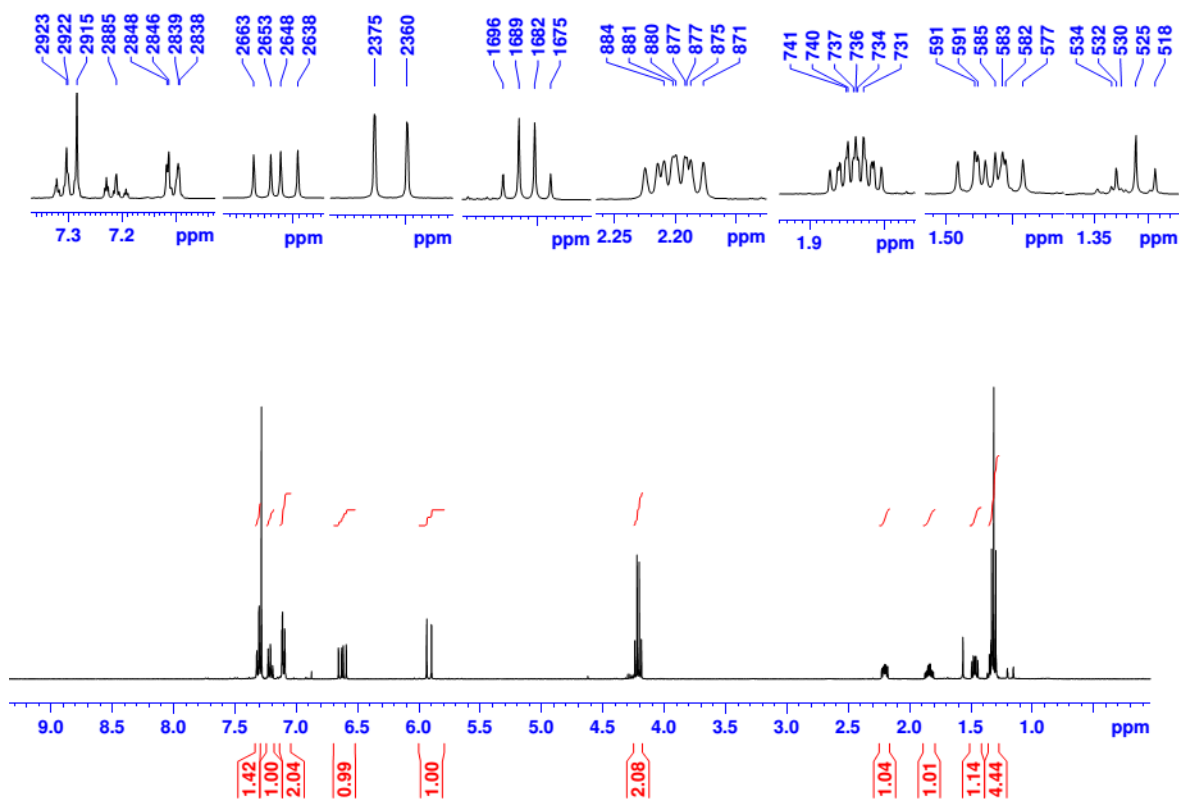

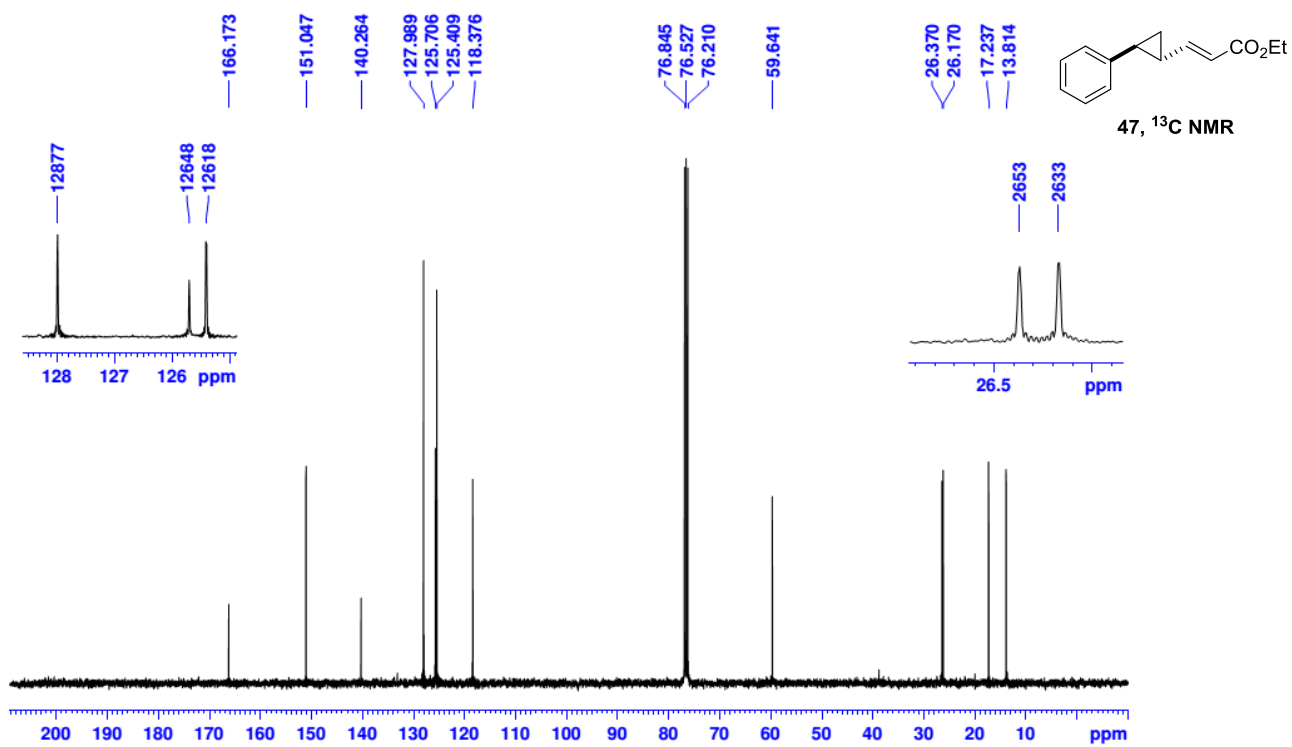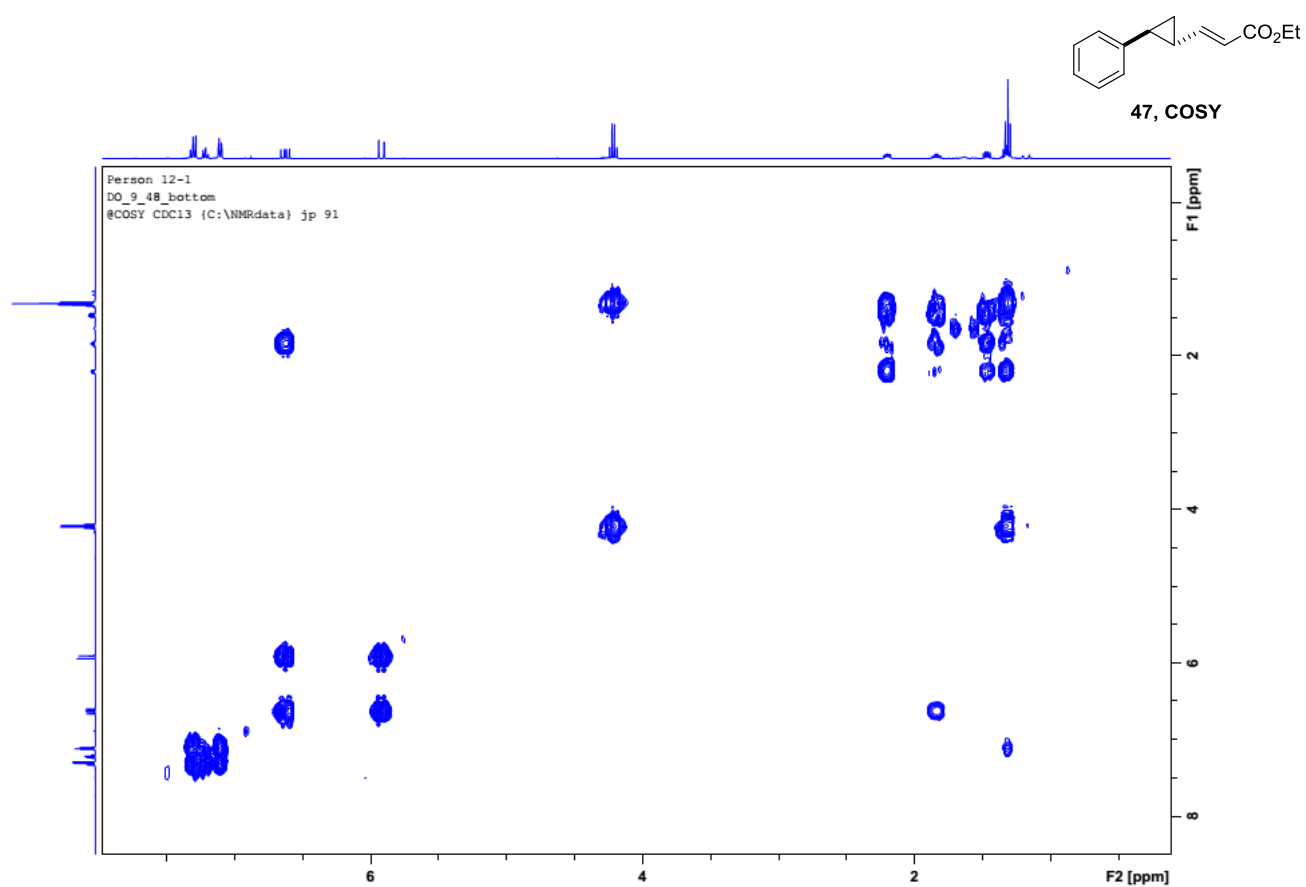

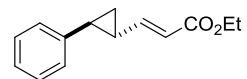

47, HSQC

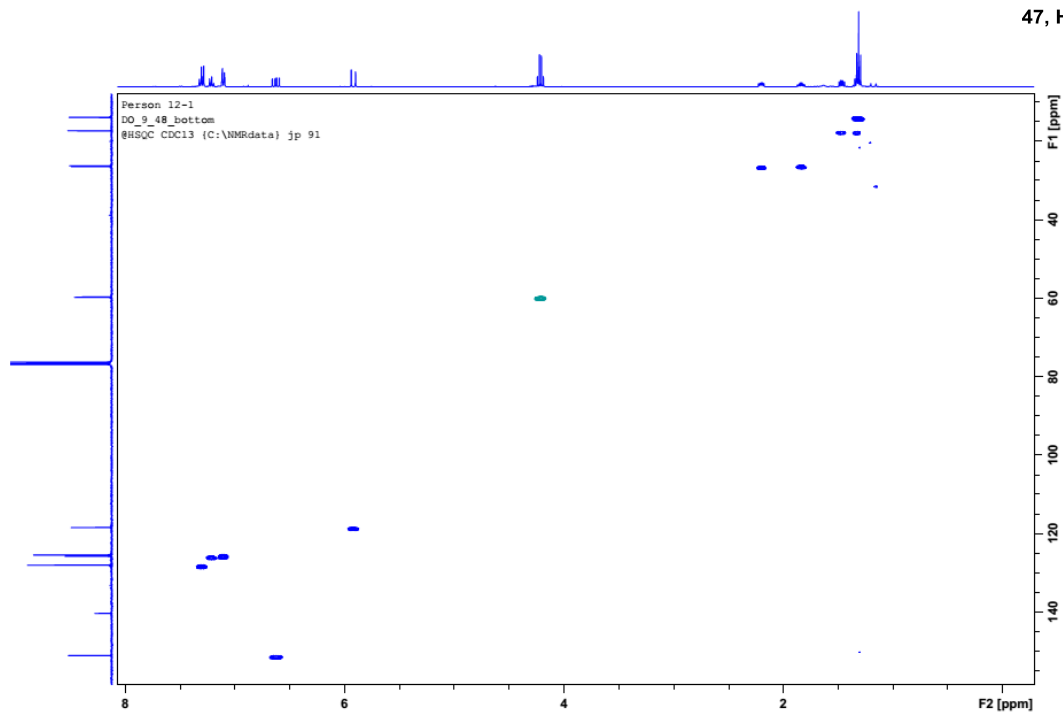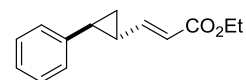

47, HMBC

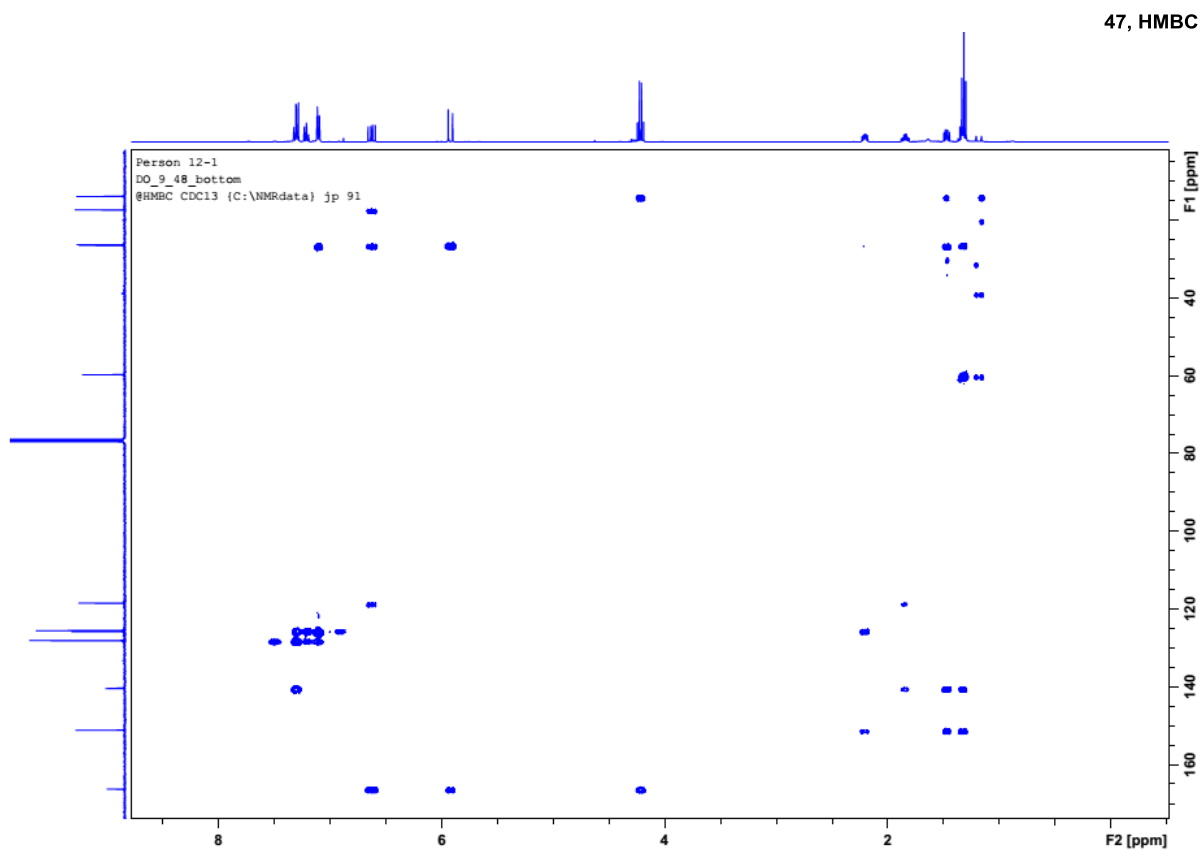

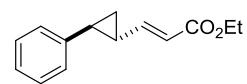

47, NOESY

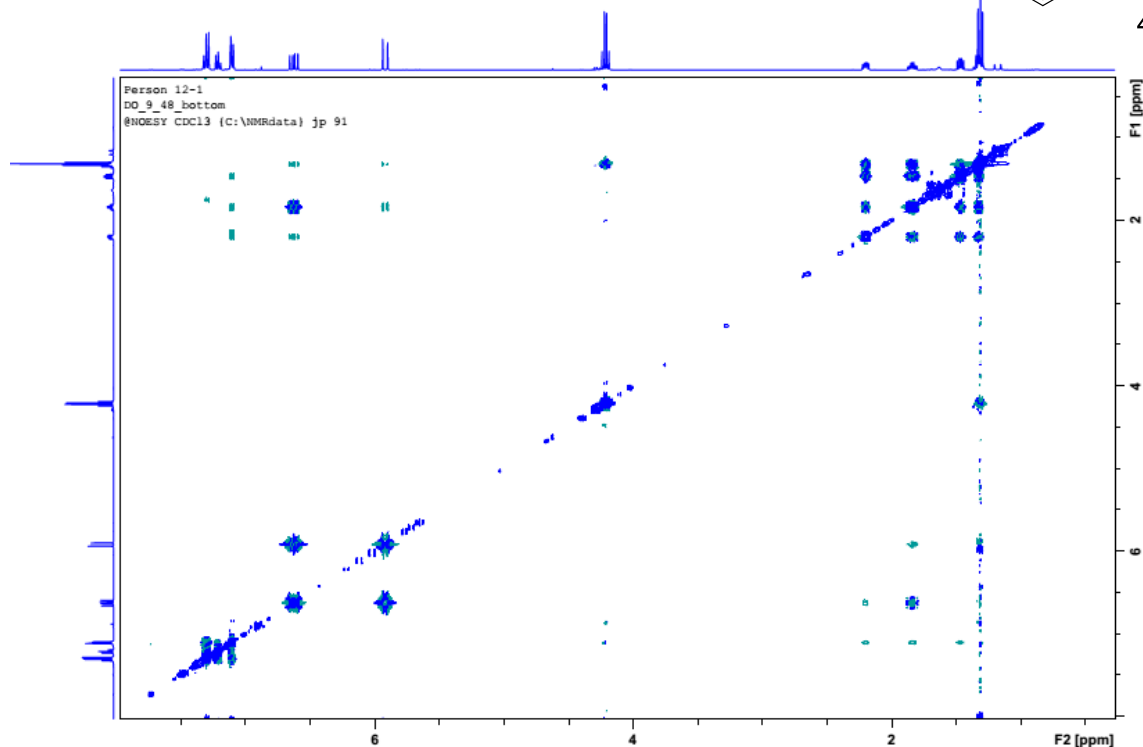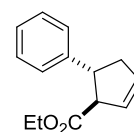

38a, <sup>1</sup>H NMR

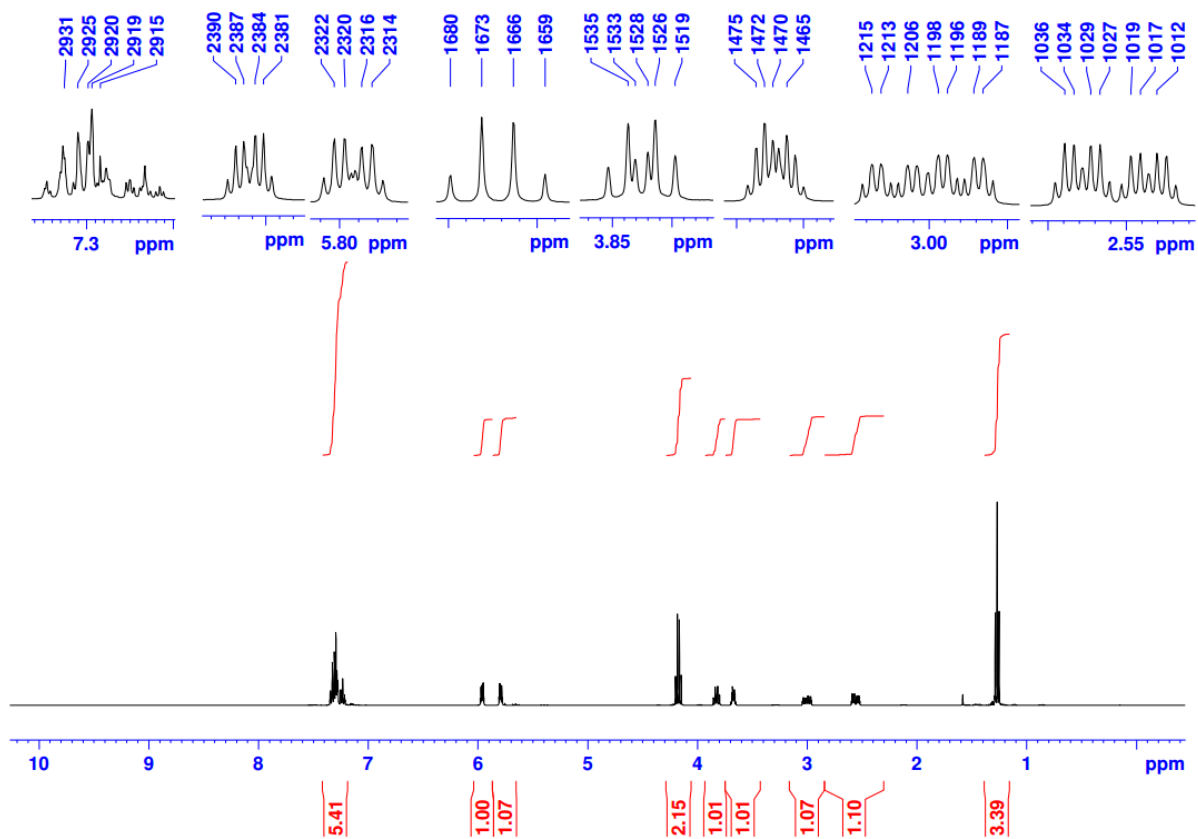

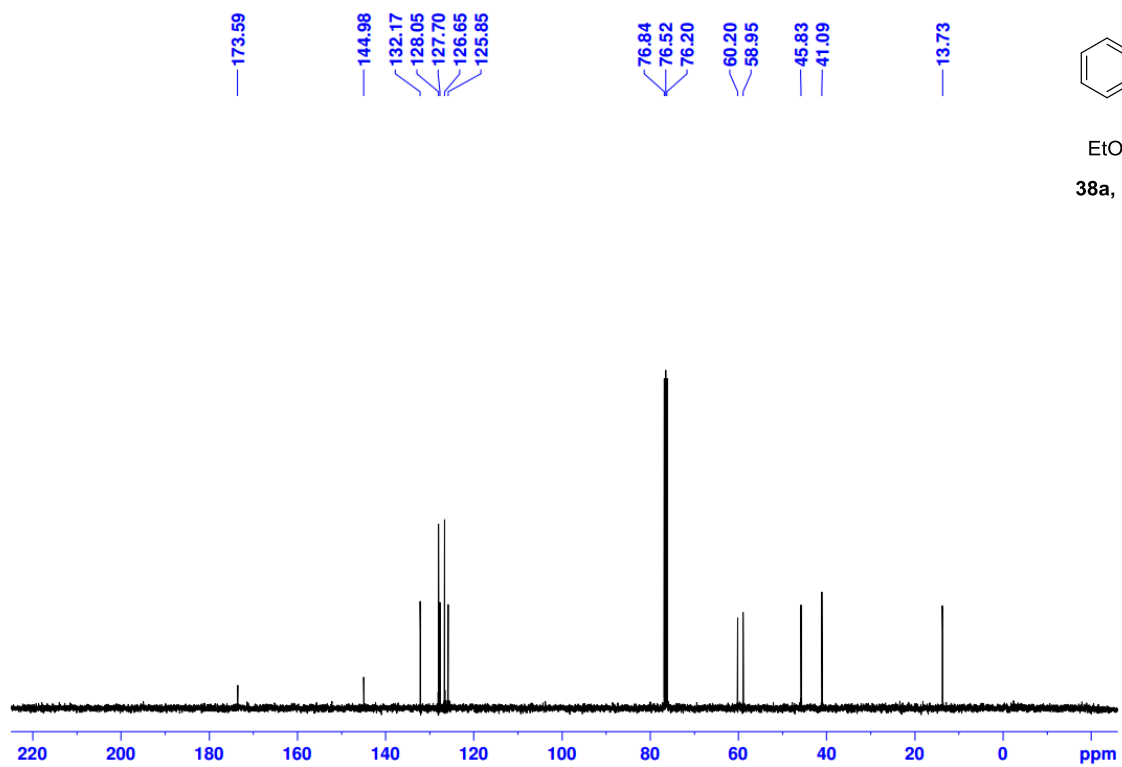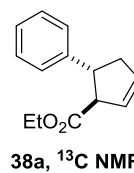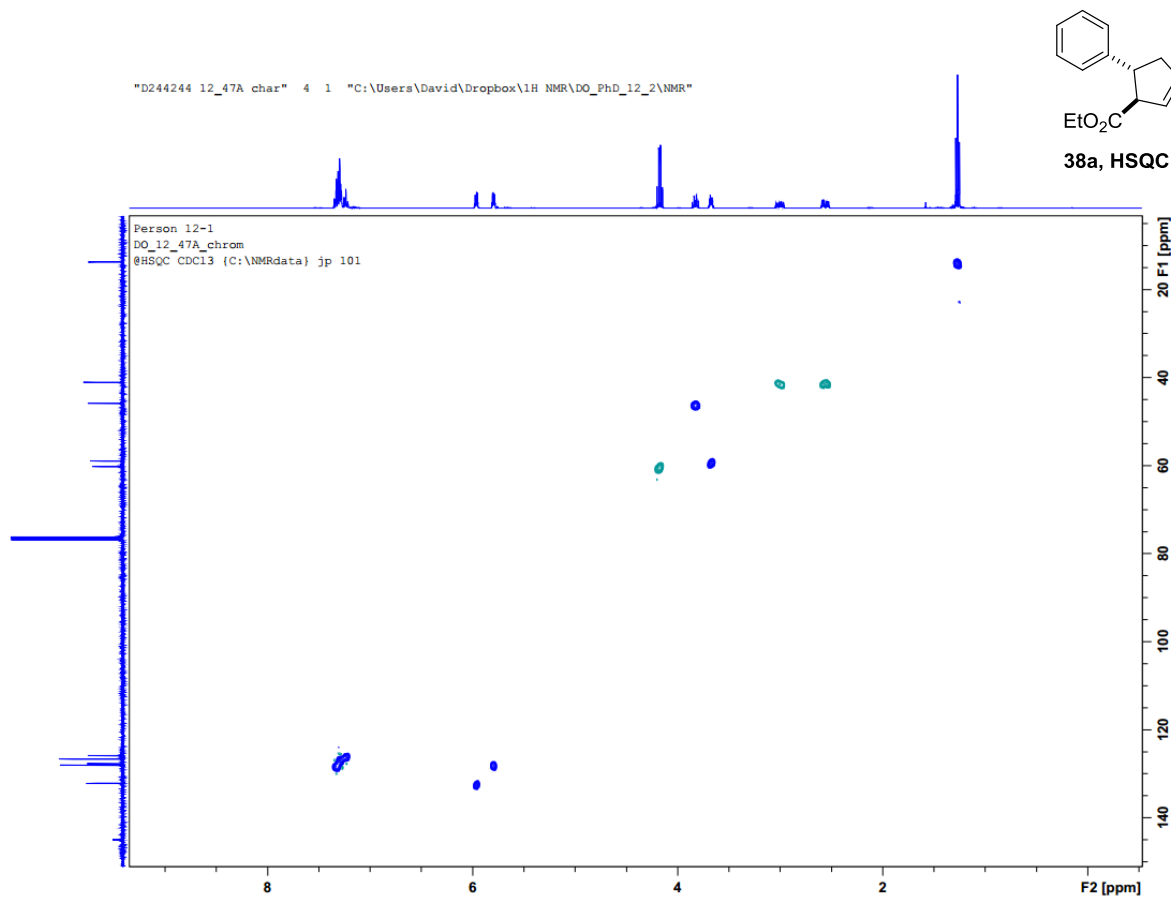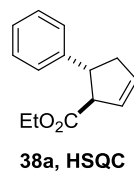

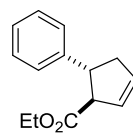

38a, HMBC

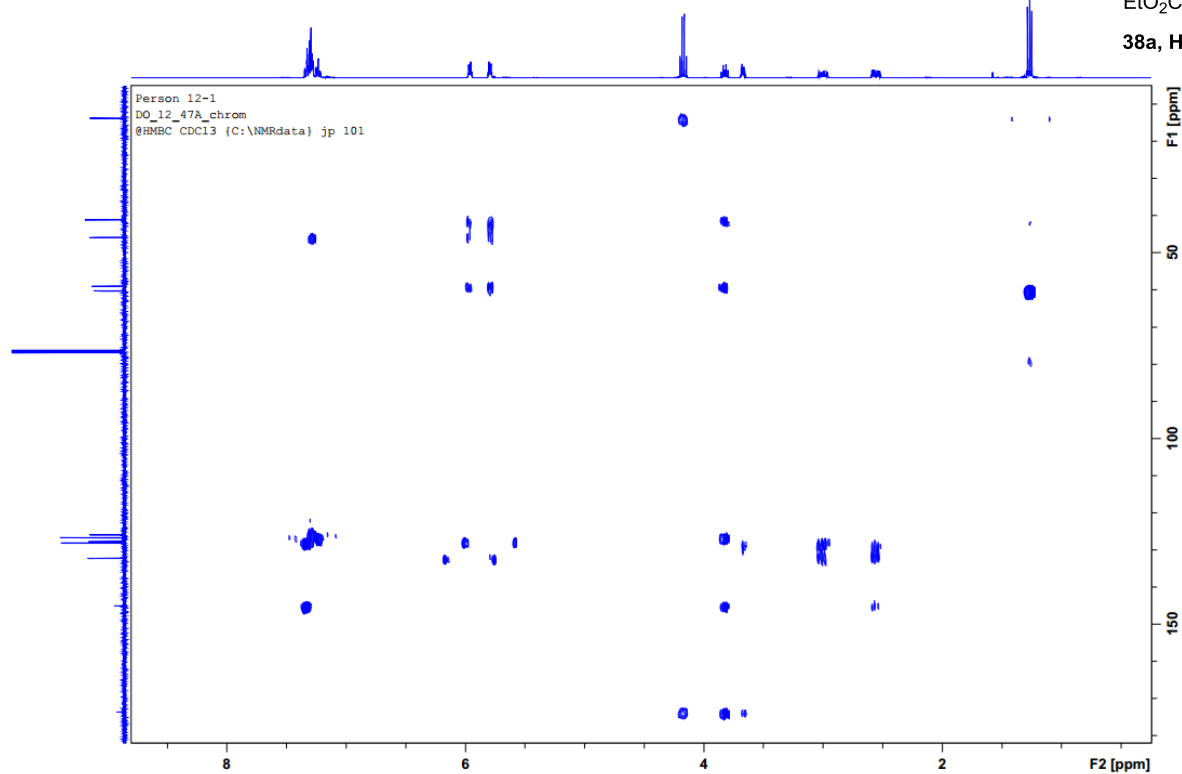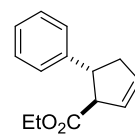

38a, NOESY  
no Et-Ar through  
space interactions  
trans-relationship

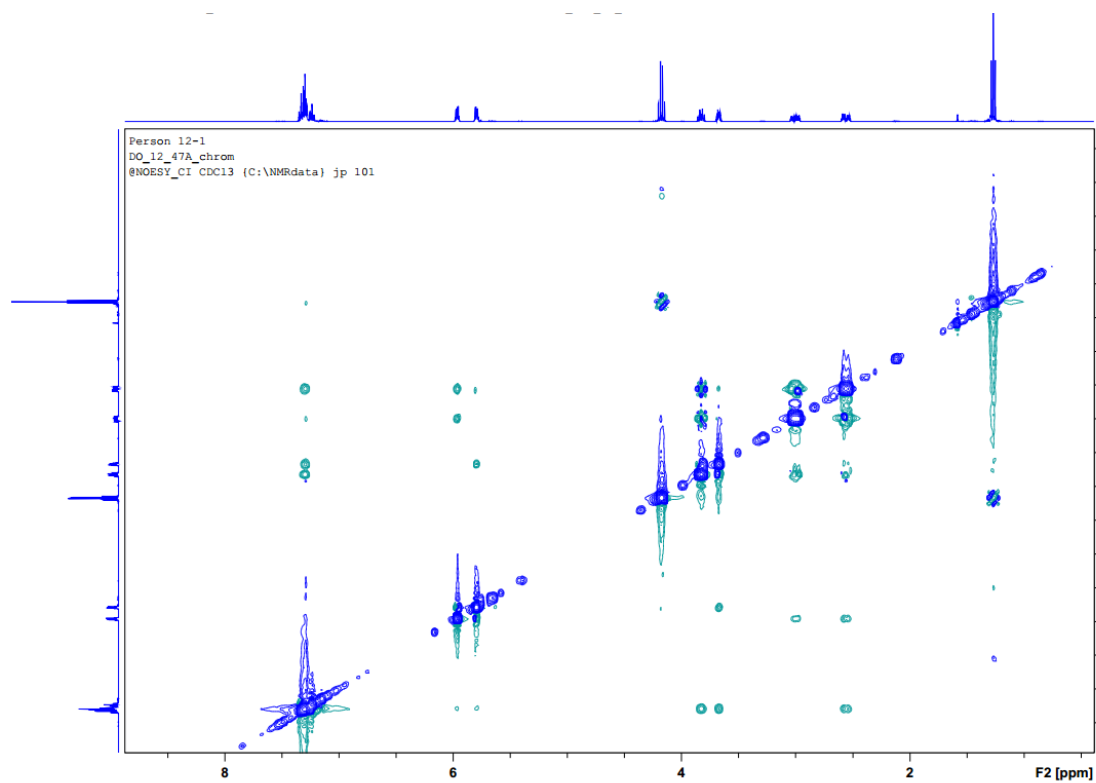

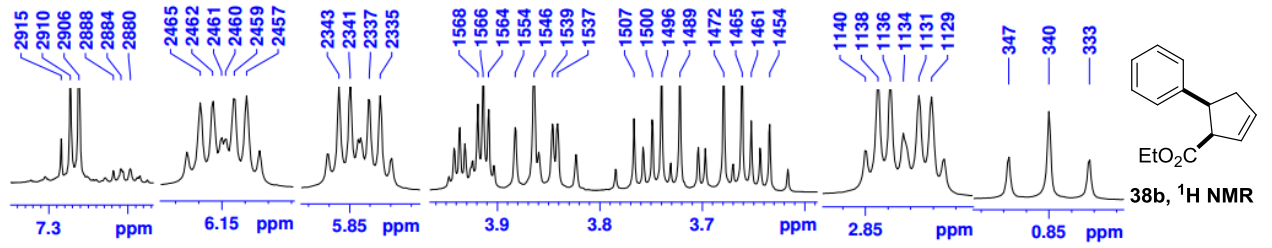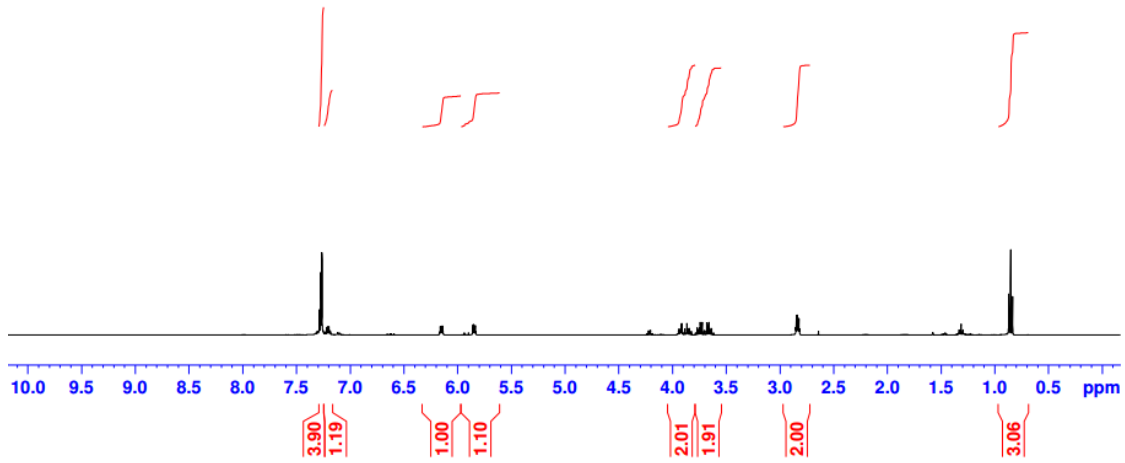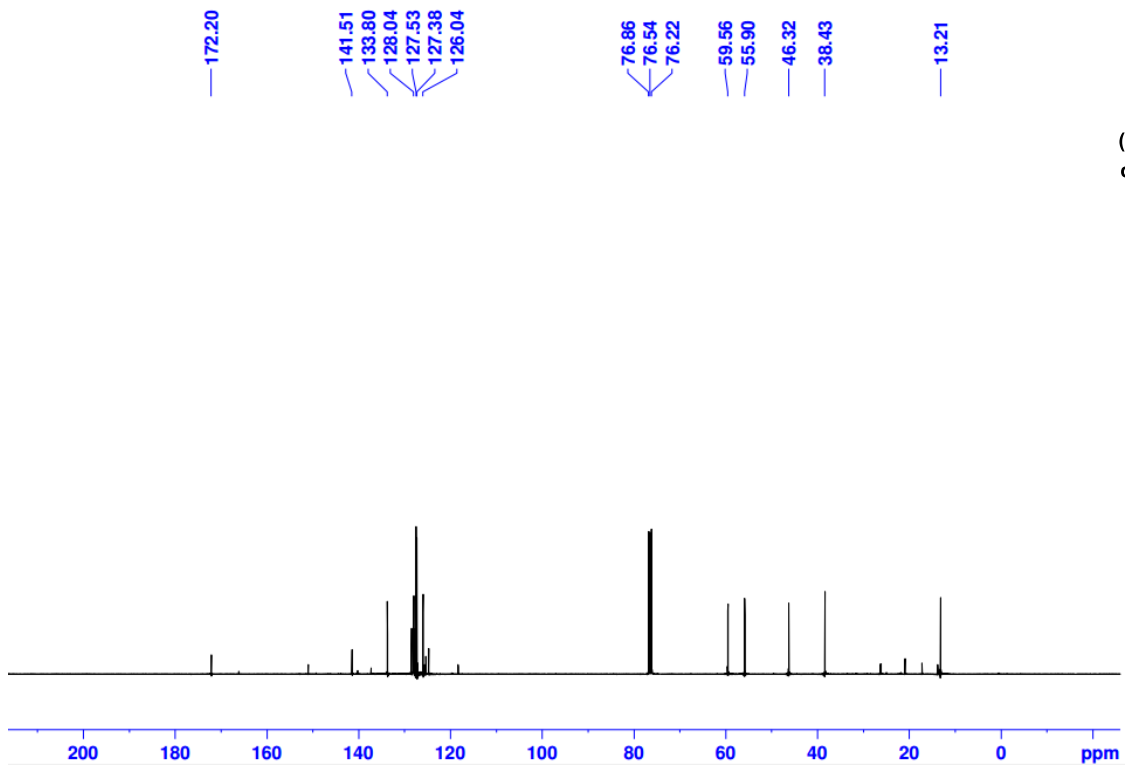

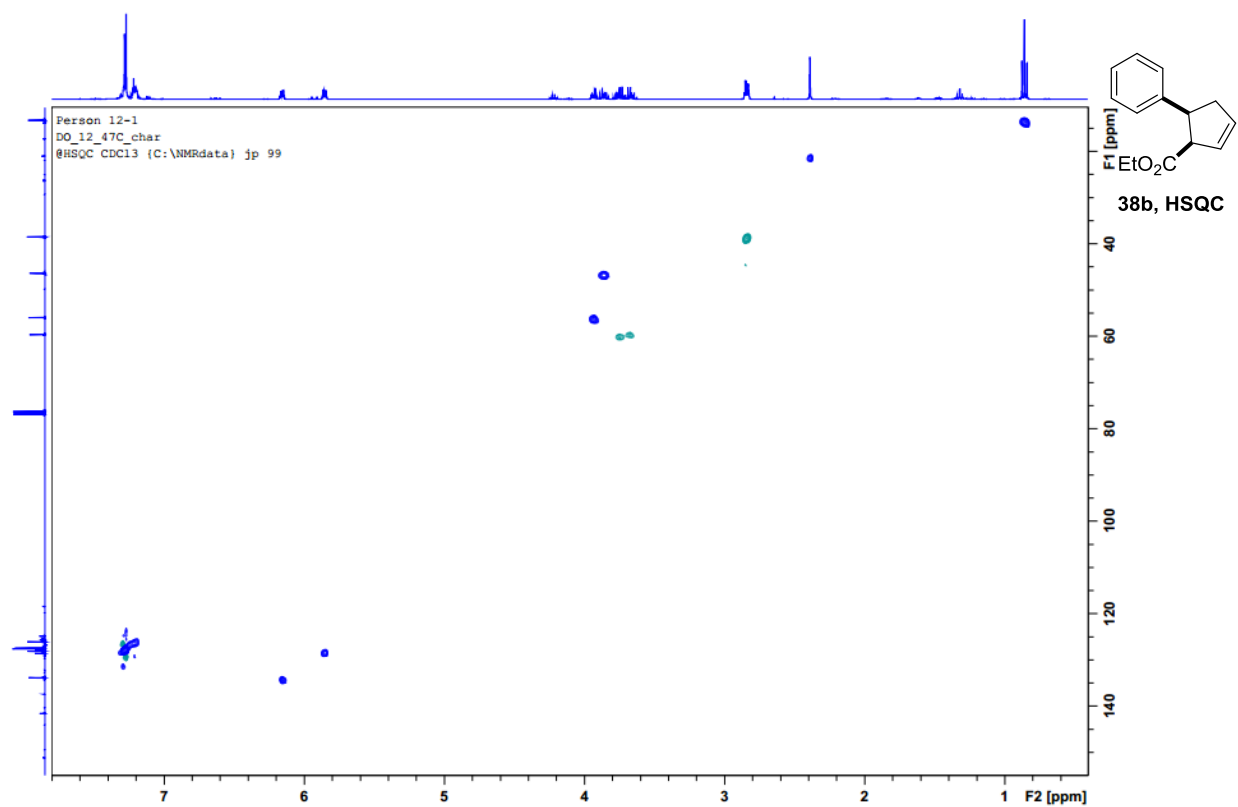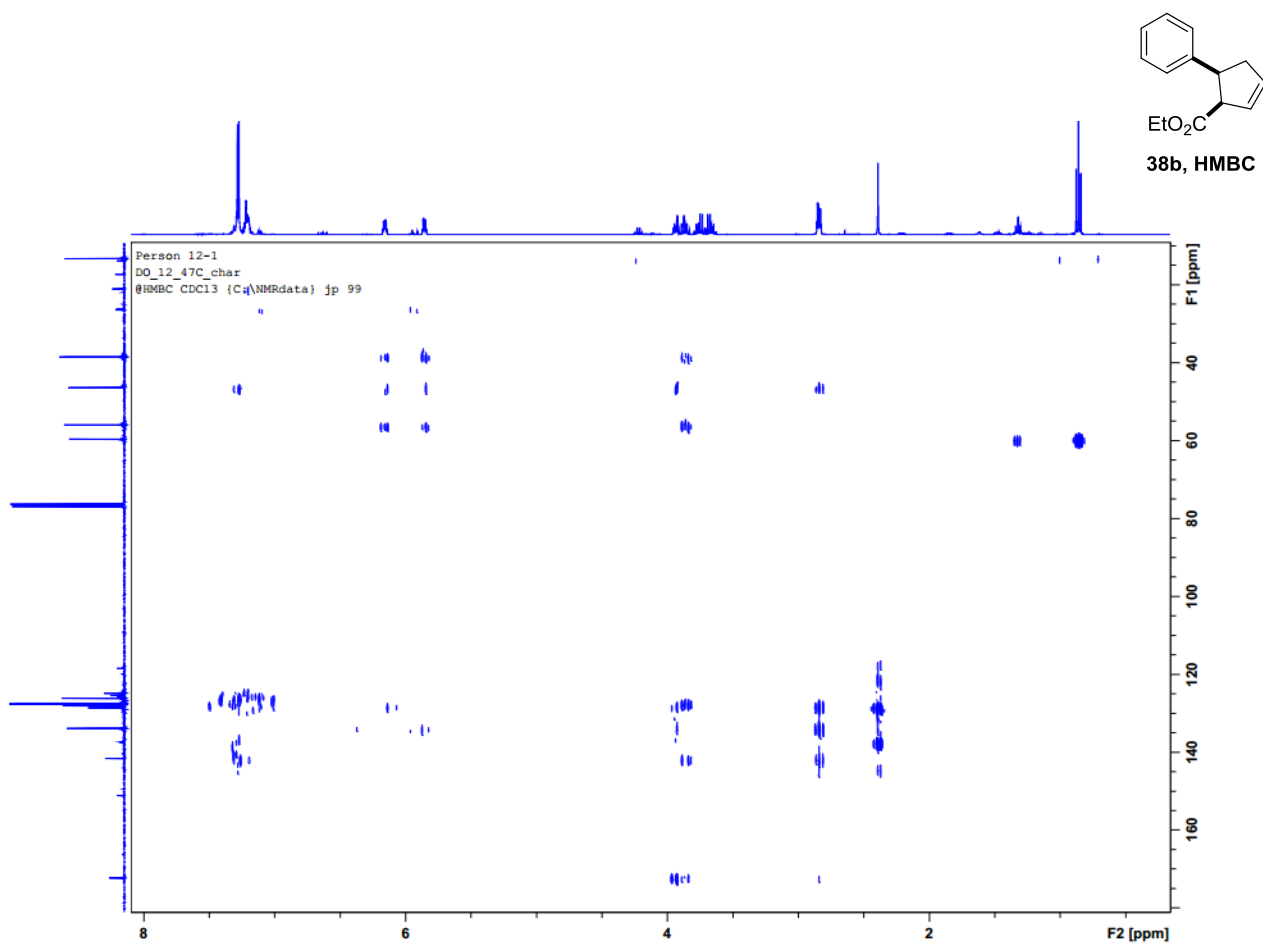



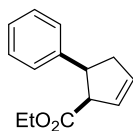

**38b, NOESY**  
observed Et-Ar through  
space interactions  
*cis*-relationship

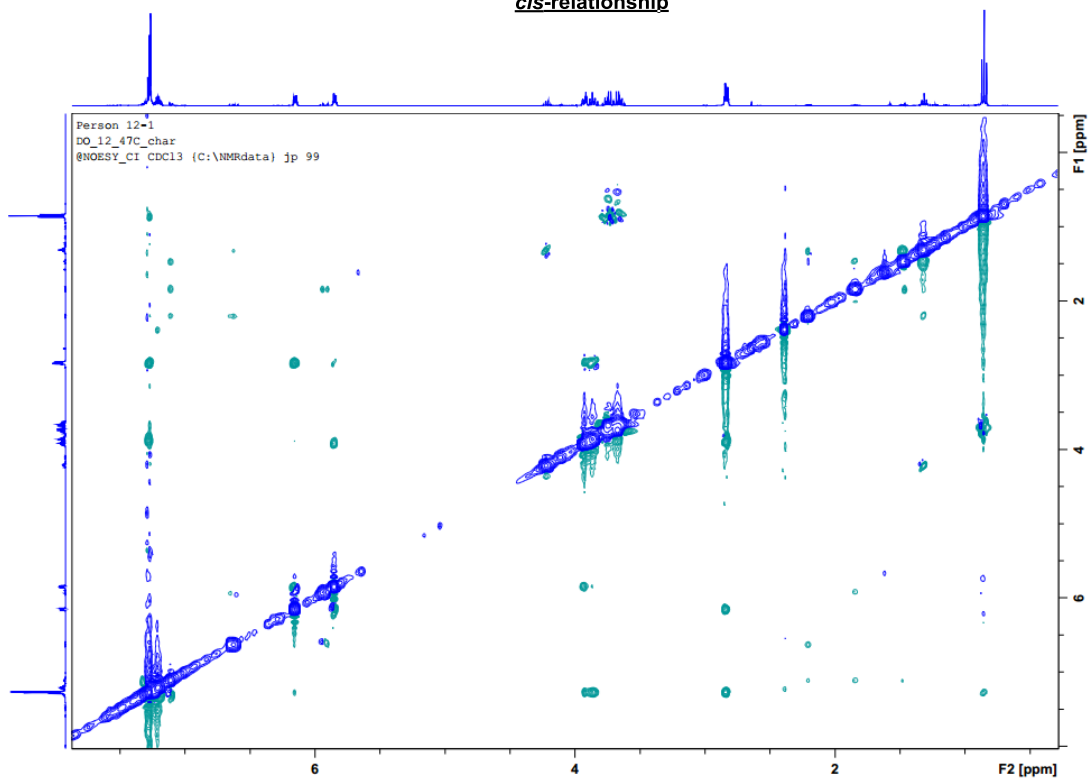

## Decomposition Evidence for Furyl Vinyl Acetate 14a

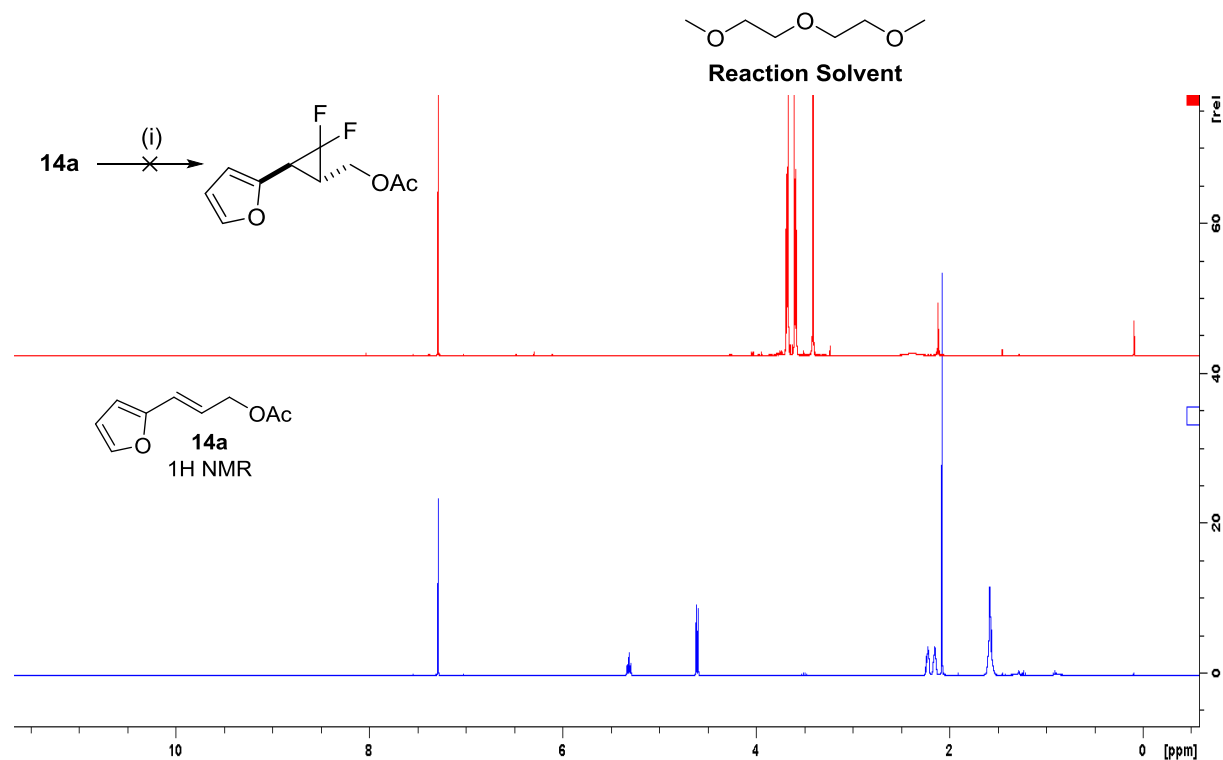

**Figure S4:** Overlay of <sup>1</sup>H NMR spectra representing 2-furyl vinyl acetate **14a** (bottom) and the resulting crude mixture from the failed difluorocyclopropanation. Conditions: (i) MDFA (2.5 eq.), TMSCl (2.5 eq.), KI (2.8 eq.), diglyme (1.17 eq.), 120 °C, 24 h.

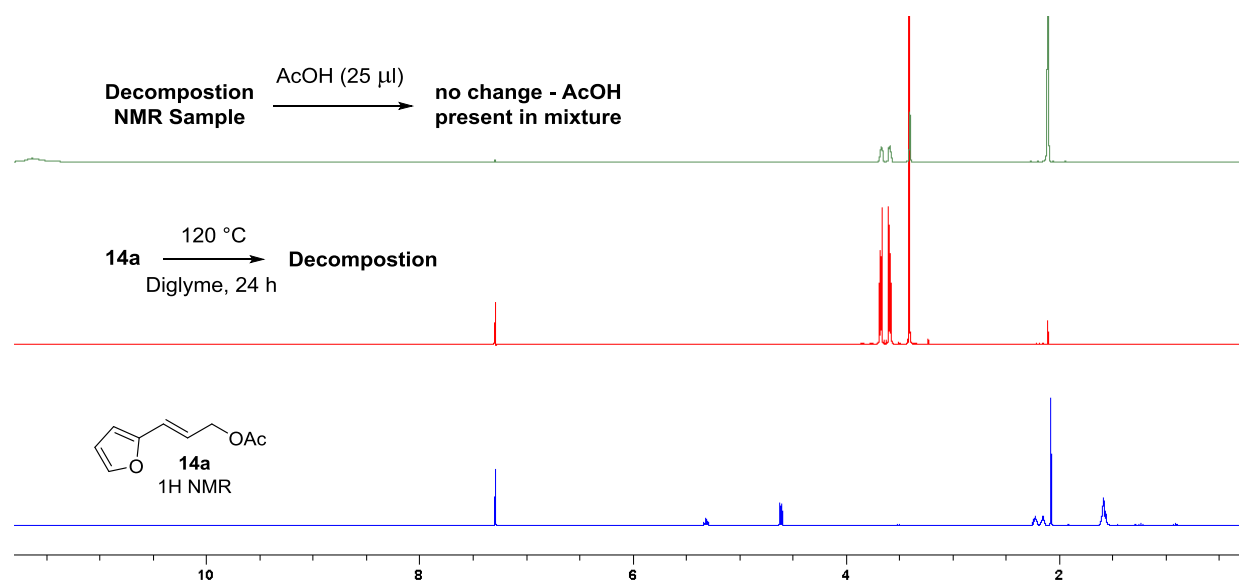

**Figure S5:** Overlay of <sup>1</sup>H NMR spectra representing 2-furyl vinyl acetate **14a** (bottom), resulting mixture after heating **14a** at 120 °C for 24 hours (middle) and spiking the middle NMR sample with 25 μl of AcOH which showed no change suggesting that the AcOH was the only visible side product from the decomposition experiment (top).

## Difluorocyclopropanation of Ethyl Cinnamate

Both synthesised and commercial ethyl cinnamate **13b** gave similarly low conversion after difluorocyclopropanation (28% and 29%, respectively) so we were confident that there were no side products from the previous olefination step which were responsible for the poor conversion (**Table 3**, Entries 2-3). Again, slightly higher conversions could be obtained by decreasing the reaction time to 4 hours (**Table 3**, Entry 4, 37% conversion) but **15b** could not be separated from **13b** using either chromatography or distillation. Under the same conditions, cinnamyl acetate (**14b**) had given 100% conversion to the desired difluorocyclopropane.<sup>S20</sup> The dramatic reactivity difference between **14b** and **13b** can be attributed to increased electron-deficiency of the alkene in **13b**. Selectivity experiments carried out by Dolbier and co-workers showed that difluorocarbene addition to a 1:1 mixture of butyl acrylate and 1-octene favoured the latter at 120 °C (product ratio of 1:3.3), consistent with the lower reactivity observed for **13b**.<sup>S22</sup> Other literature methods<sup>S23,24</sup> using commercial reagents were previously unsuccessful when used for the difluorocyclopropanation of cinnamyl acetate (**14b**)<sup>S20</sup> and were therefore not investigated for these less reactive alkenoates.

Dolbier and co-workers reported more success in the synthesis of **15b** using alternative MDFA conditions (64%, <sup>19</sup>F NMR conversion);<sup>S25</sup> we were able to replicate their results (69% <sup>1</sup>H NMR conversion) but felt that the longer reaction time of 48 hours would be detrimental to the product recovery of the more reactive alkenoates. Higher conversion of 81% was achieved for this substrate by the same group using trimethylsilyl 2,2-difluoro-2-(fluorosulfonyl)acetate (TFDA) as the difluorocarbene precursor but it is unclear if this is an isolated or NMR yield.<sup>S22</sup> This reagent is less practical than others since it is prone to hydrolysis; purification is necessary before every reaction. We observed similar conversion with TFDA (79%, determined by <sup>1</sup>H NMR) but the isolation of synthetically useful quantities of **15b** proved difficult due to the presence of starting alkenoate **13b** and the previously unreported difluoromethyl ester side product **S13** (**Scheme S4a**, see below for a full discussion on difluorocyclopropanation of **13b** with TFDA). We currently do not have a reason for the formation of **S13** but it is proposed to proceed via a mechanism similar to that of the difluoromethylation of acids reported by Wu and Chen<sup>S26</sup> and driven by the elimination of ethene (**Scheme S4a**).

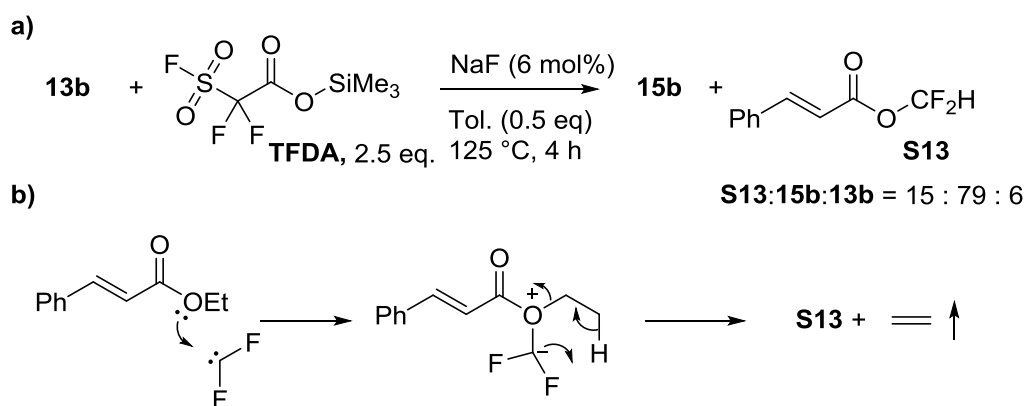

**Scheme 5:** a) Difluorocyclopropanation of **13b** using TFDA (ratios determined by  $^1\text{H}$  NMR). b) Proposed mechanism for the formation of side product **S13**.

Reported difluorocyclopropanation methodologies are generally screened against a set of simple alkene substrates but reactivity issues are rarely discussed. We have used alkenoates **13a** and **13b** to assess the most reactive procedures in the literature and highlighted the synthetic limitations for electron deficient olefins. For this study, the main purpose of the synthetic investigations was to obtain a range of substituted cyclopropane precursors in order to test computational predictions. No further screening of conditions was carried out, but recent synthetic advances with metal-mediated difluorocyclopropanation reported by Ichikawa and co-worker, look to be a more promising method for the synthesis of difluorocyclopropyl esters **15b**.<sup>S27</sup>

#### Preparation of trimethylsilyl 2,2-difluoro-2-(fluorosulfonyl)acetate (**S14**)

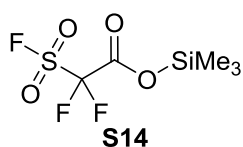

A mixture of chlorotrimethylsilane (4.9 mL, 38.8 mmol) and commercial trimethylsilyl 2,2-difluoro-2-(fluorosulfonyl)acetate (TFDA, **S14**, 1 mL, 9.7 mmol, 80% purity determined by  $^{19}\text{F}$  NMR) was refluxed (110 °C) for 1 hour under an atmosphere of argon. The reaction mixture was cooled to room temperature and the water condenser was replaced with an oven dried distillation apparatus and the glassware cooled under an atmosphere of argon. Excess TMSCl was removed (90 °C, 600 mbar) and the residual **S14** was stored under argon at room temperature. The  $^{19}\text{F}$  NMR spectrum of the residue confirmed reagent purity at > 95% and **S14** used immediately for a difluorocyclopropanation reaction.  $^{19}\text{F}$  NMR (376 MHz,

$\text{CDCl}_3$ ):  $\delta = -41.2$  (dd,  $J = 4.6, 4.2$  Hz,  $\text{FSO}_2\text{CF}_2$ , 1F),  $-103.1$  ppm (d,  $J = 4.4$  Hz,  $\text{FSO}_2\text{CF}_2$ , 2F). The data was in agreement with that reported by Tian and co-workers.<sup>S28</sup>

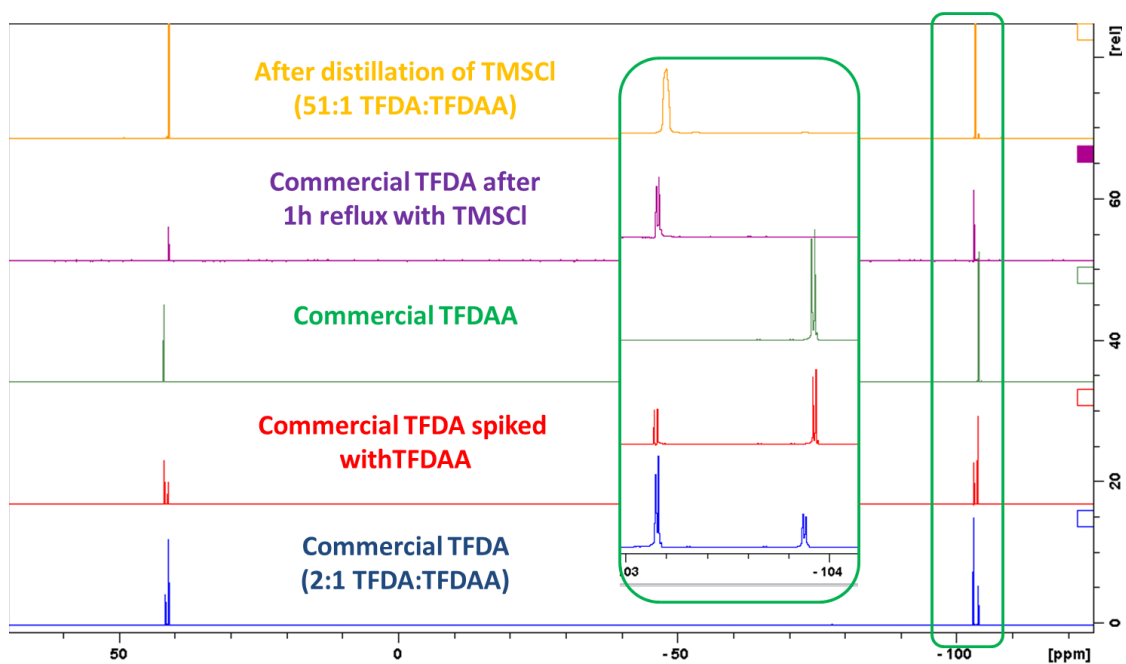

**Figure S6:**  $^{19}\text{F}$  NMR analysis of the synthesis and purification of TFDA.

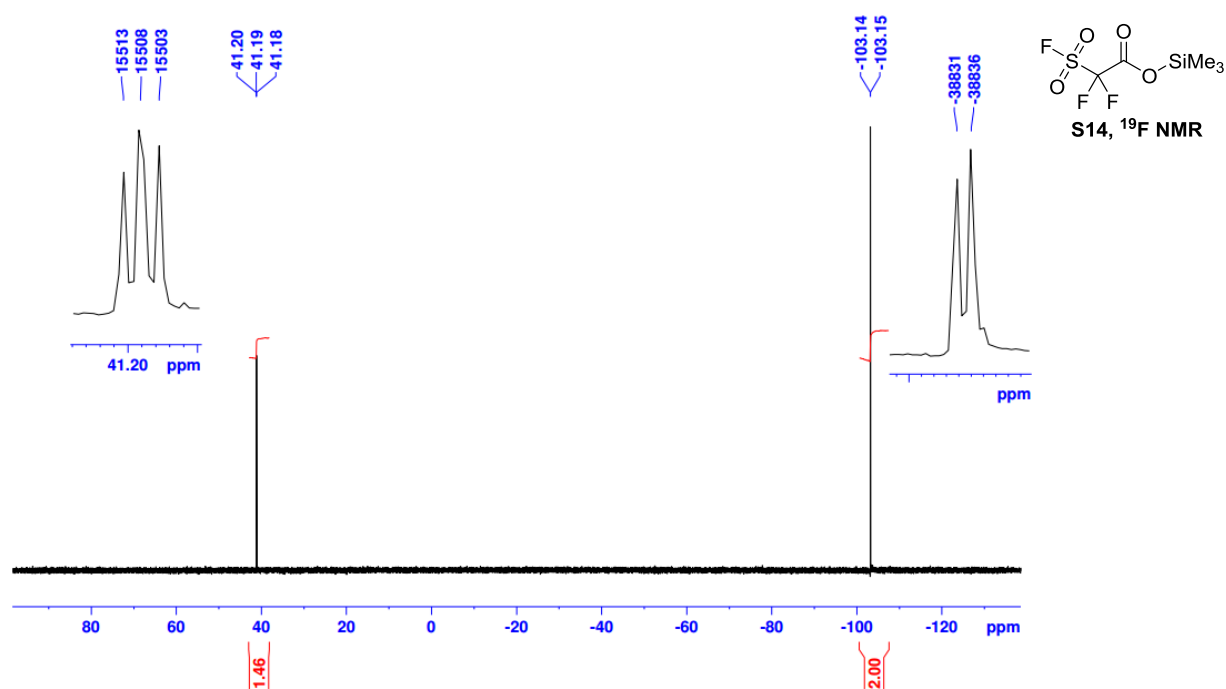

**Figure S7:**  $^{19}\text{F}$  NMR for clean TFDA used in difluorocyclopropanation reaction.

### Attempted difluorocyclopropanation of ethyl cinnamate with TFDA

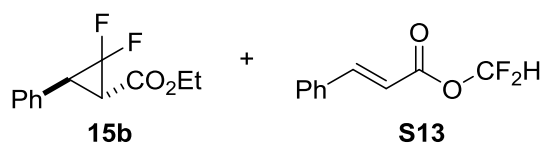

An oven dried two-necked round bottom flask containing sodium fluoride (7 mg, 0.17 mmol) was sealed with a SubaSeal, and the salt was stirred and lightly flame dried under an atmosphere of argon. A low boiling point water condenser with a gas outlet connected to an argon/vacuum manifold was attached to the reaction flask and the atmosphere was purged three times. Ethyl cinnamate (0.48 mL, 2.84 mmol) followed by toluene (0.15 mL, 1.42 mmol) were added and the colourless suspension was heated to 125 °C. Once the reaction temperature had been reached, freshly distilled TFDA (1.4 mL, 7.1 mmol) was added dropwise over a period of 3 hours using a syringe pump. The mixture was stirred for a further 1 hour (total reaction time of 4 hours). The reaction mixture was cooled to room temperature and the reaction mixture was quenched with addition of water (10 mL) and diethyl ether (10 mL). The organic layer was separated and the aqueous layer was extracted with diethyl ether (4 x 10 mL). The original organic layer and the extracts were combined, dried (MgSO<sub>4</sub>) and concentrated under reduced pressure to remove volatile materials. The <sup>1</sup>H NMR spectrum of the crude reaction mixture was used to determine the ratio of **13b**, **15b** and **S13**.

A similar crude reaction mixture was purified by column chromatography on silica gel (1:19 to 1:9 Et<sub>2</sub>O in hexane) and a mixture of **S13** and **13b** (4:1 ratio determined by NMR) was isolated.

Person 12-1  
 DO\_9\_62\_AFWU\_TFDA\_ethyl\_cinnamate  
 @proton CDCl3 (C:\NMRdata) jp 9

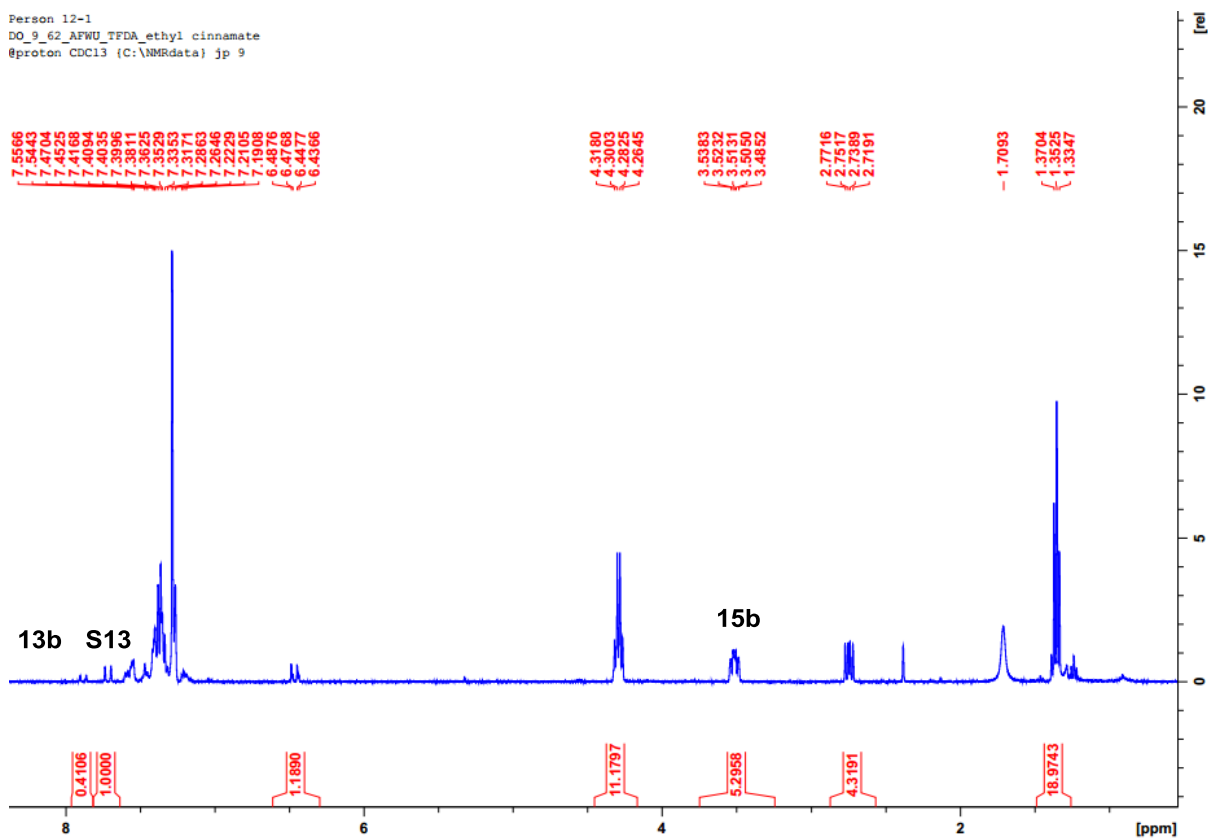

**Figure S8:** Crude  $^1\text{H}$  NMR used to relative conversion ratio from TFDA difluorocyclopropanation.

Extracted data for **S13**:  $R_f = 0.26$  (1:4  $\text{Et}_2\text{O}$  in hexane);  $^1\text{H}$  NMR (400 MHz,  $\text{CDCl}_3$ ):  $\delta = 7.88$  (d,  $J = 16.0$  Hz,  $\text{ArCH}=\text{CH}$ , 1H), 7.60–7.58 (m,  $\text{ArH}$ , 3H), 7.49–7.43 (m,  $\text{ArH}$ , 2H), 7.22 (t,  $^2J_{\text{H-F}} = 71.2$  Hz,  $\text{CF}_2\text{H}$ , 1H), 6.56 ppm (d,  $J = 16.0$  Hz,  $\text{CH}=\text{CHCO}$ , 1H);  $^{13}\text{C}$  NMR (100 MHz,  $\text{CDCl}_3$ ):  $\delta = 162.8$  (t,  $J_{\text{C-F}} = 3.4$  Hz), 149.2, 133.6, 131.6, 129.2, 128.8, 115.1, 112.8 ppm (t,  $^1J_{\text{C-F}} = 257.1$  Hz);  $^{19}\text{F}$  NMR (376 MHz,  $\text{CDCl}_3$ ):  $\delta = -91.4$  ppm (d,  $^2J_{\text{F-H}} = 71.2$  Hz);  $\bar{\nu}/(\text{film}) = 1738, 1634, 1059, 980$   $\text{cm}^{-1}$ ; MS (CI):  $m/z$  (%): 227 (4)  $[\text{M}+\text{C}_2\text{H}_5]^+$ , 199 (47)  $[\text{M}+\text{H}]^+$ , 157 (6), 131 (100)  $[\text{M}-\text{OCF}_2\text{H}]^+$ ;  $t_R$  (GC) = 10.45 minutes.

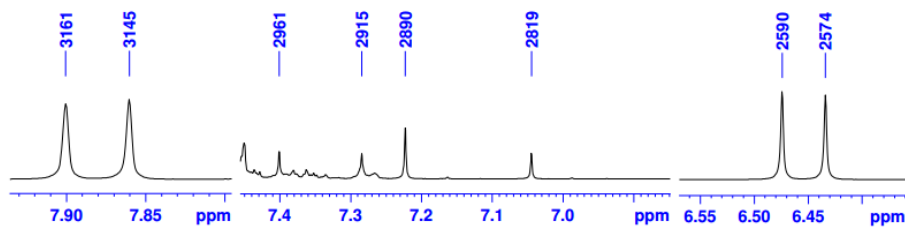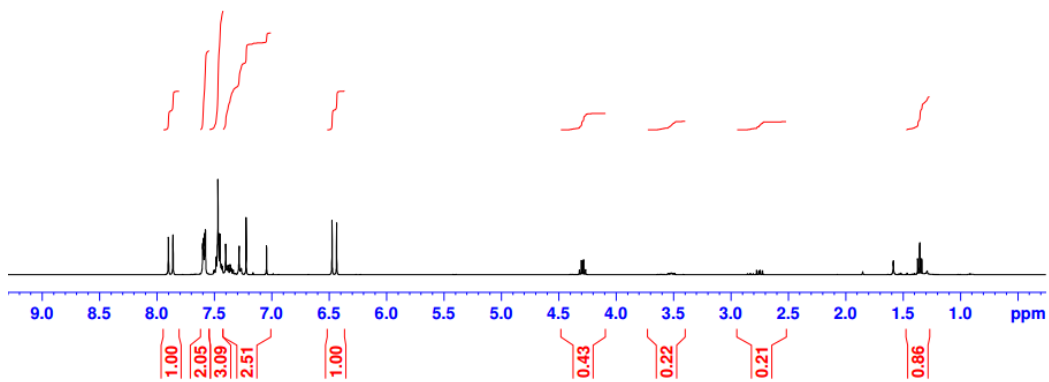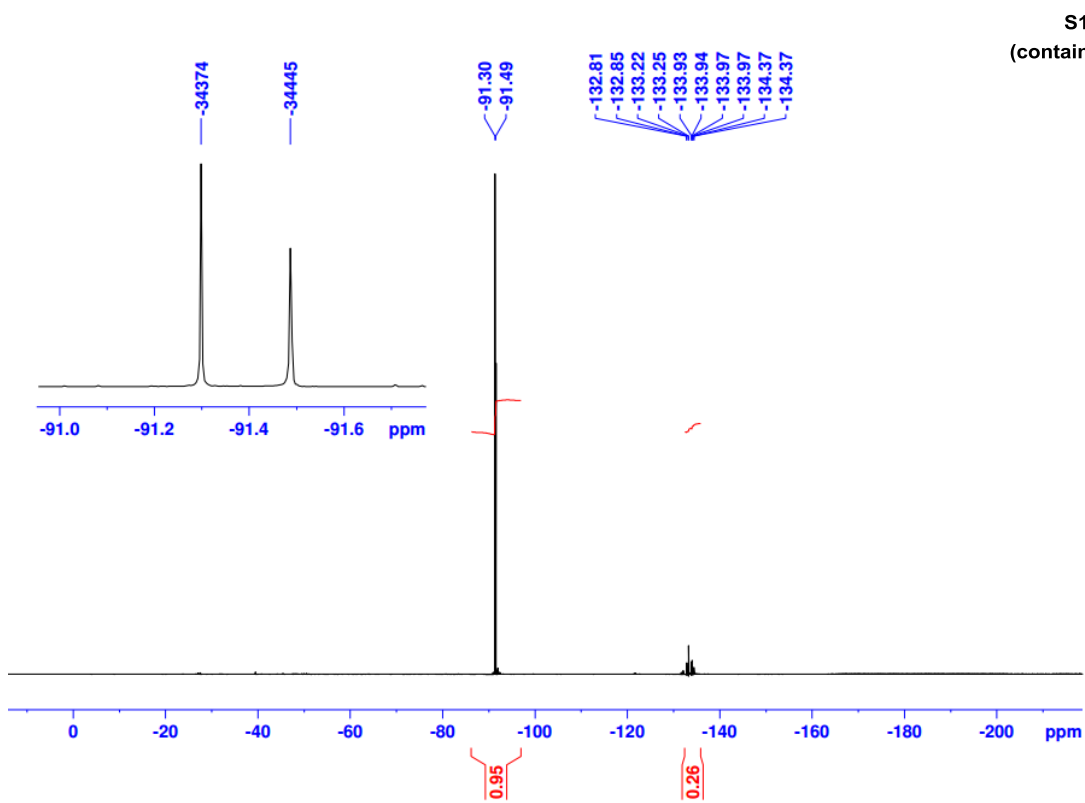



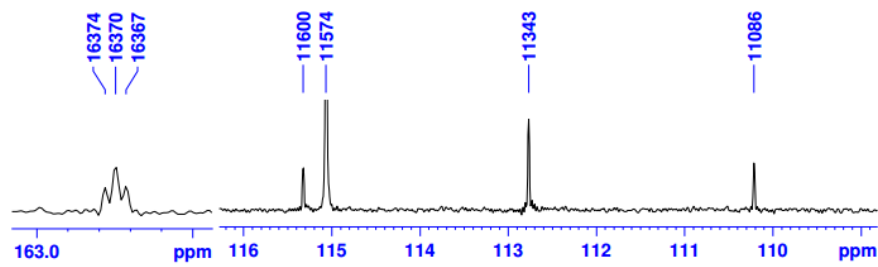

S13, <sup>13</sup>C  
(contains 20% 15b)

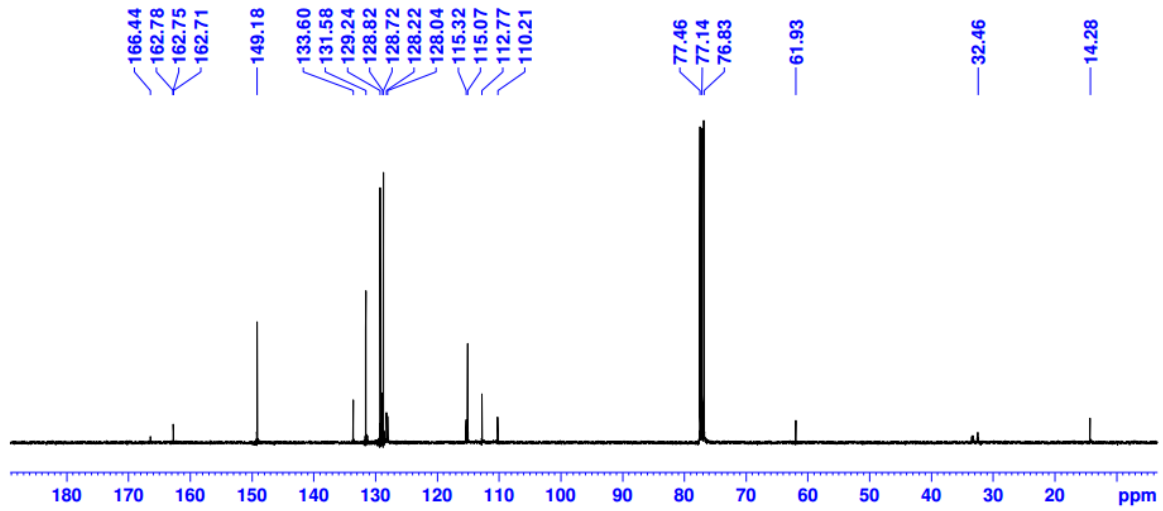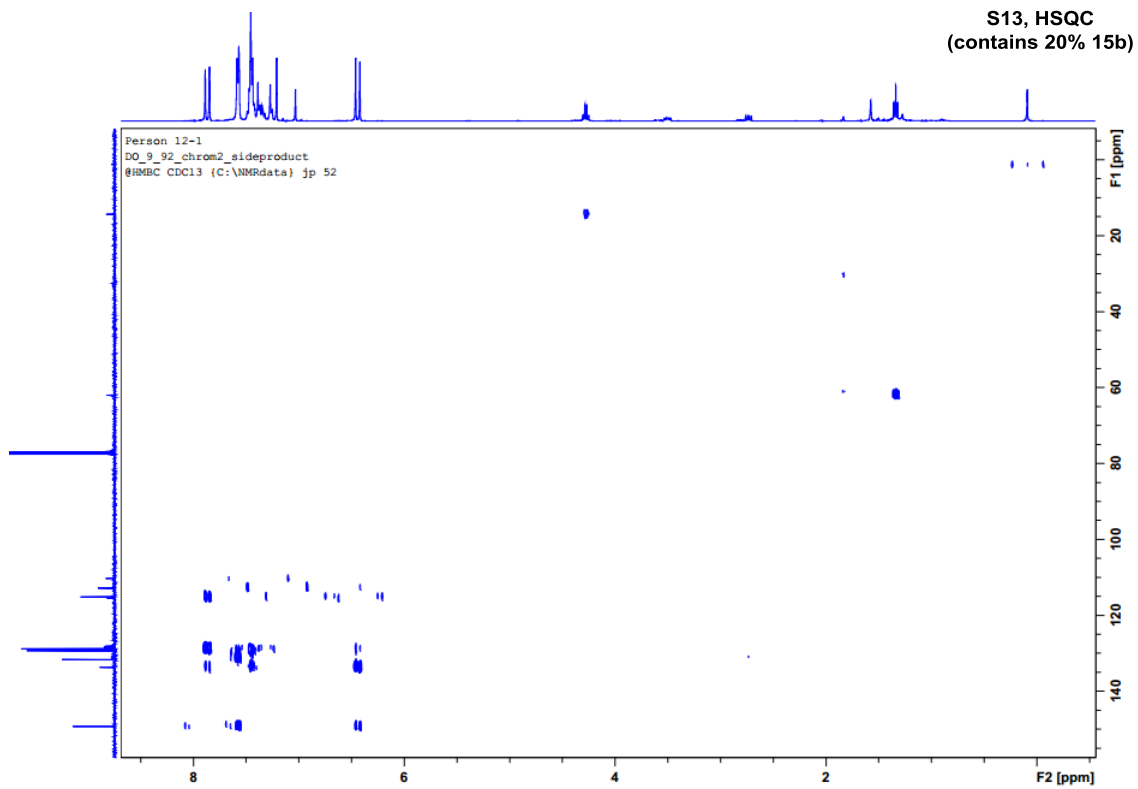

S13, HSQC  
(contains 20% 15b)

S13, HMBC  
(contains 20% 15b)

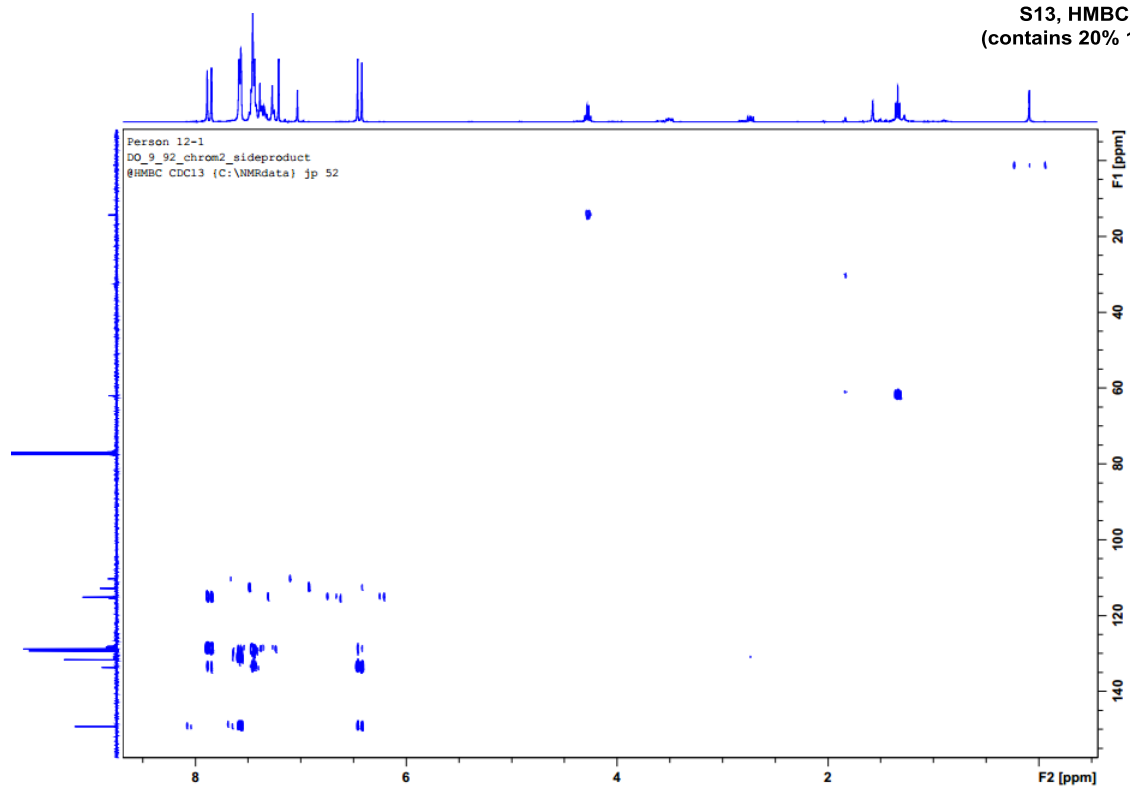

## Evidence of Difluorocarbene-Diglyme Reaction

An oven dried two-necked round bottom flask containing sodium chlorodifluoroacetate (275 mg, 1.8 mmol) was sealed with a SubaSeal, and the salt lightly flame dried under vacuum. The atmosphere was replaced with nitrogen and the flask allowed to cool to room temperature. A low boiling point water condenser with a gas outlet connected to an argon/vacuum manifold was attached to the reaction flask and the atmosphere was purged three times. Diglyme (1 mL) was added and a reaction aliquot (< 0.1 mL) was taken and analysed by  $^{19}\text{F}$  NMR. The saturated mixture was heated to 180 °C and reaction aliquot taken at different time points and analysed by  $^{19}\text{F}$  NMR (see **Figure S9**).

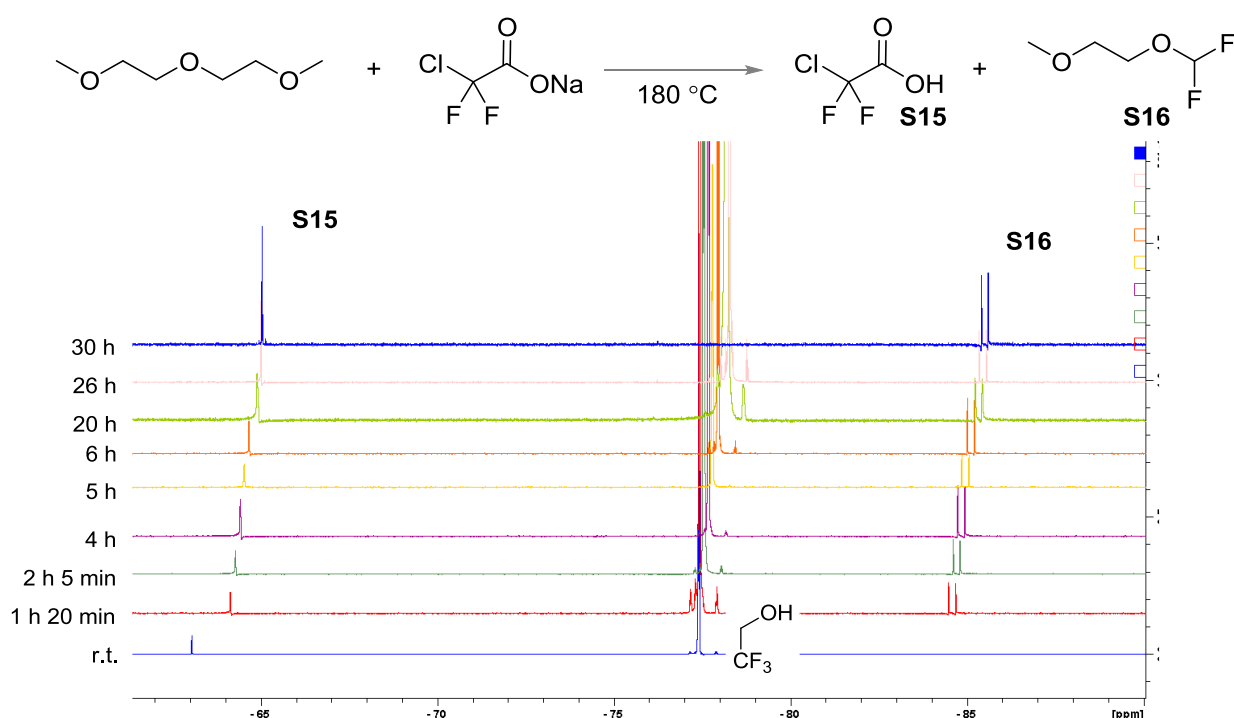

**Figure S9:**  $^{19}\text{F}$  NMR ( $\text{CDCl}_3$ , 400 MHz) spectrum of reaction time-points showing difluorocarbene generated from sodium chlorodifluoroacetate reacting with diglyme (horizontal offset = 0.15 ppm, trifluoroethanol used as external reference).

The observed  $^{19}\text{F}$  NMR experimental data for the proposed side product **S16** (-84.6 ppm, d,  $^2J_{\text{F-H}} = 74.6$  Hz) is extremely similar to 1,1-difluoro-3-(2-methoxyethoxy)propane reported by Rozen and co-workers<sup>S29</sup> (-84.6 ppm, d,  $^2J_{\text{F-H}} = 75.0$  Hz). Houk *et. al.* previously performed low level theoretical calculations (MP2/3-21G) showing that the attack by water on difluorocarbene resulted in a stabilisation of 9.7 kcal mol<sup>-1</sup> compared with the separate species, concluding that the ether stabilisation was greater than that seen with alkenes.<sup>S30</sup>

This side product was common when less reactive alkenoates underwent difluorocyclopropanation attempts with MDFA and thought to proceed via the attack by solvent on difluorocarbene followed by elimination of vinyl ether **S17** (Scheme S5).

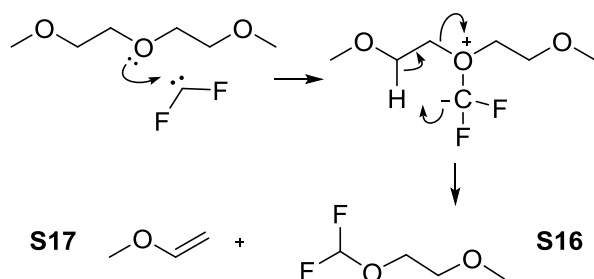

**Scheme S6:** Proposed mechanism for the reaction between diglyme and difluorocarbene.

### Trend in Difluorocyclopropanation Conversion and Calculated HOMO Energies

The HOMO energy for a reactive species is generally considered to give a good representation of the compounds' nucleophilicity, but only a weak trend was observed between the reactivity of the alkenoates (determined by percentage conversion) and the HOMO energies of **13a-c**, **13f** and **13h** ( $R^2 = 0.8287$ , see Supporting Information for details). This model only assessed the reactivity of the olefin and did not take into consideration the alternative trapping reactions difluorocarbene can undergo; difluoromethylation of carboxylic acids, ketones, alcohols, thiols, heterocyclic amines and hydrophosphine oxides have all been reported.<sup>S31-35</sup> Compounds which reacted slowly under the difluorocyclopropanation conditions contained common side products which were attributed to difluorocarbene reacting with the reaction solvent diglyme.

Aryl alkenoates were built *de novo* using Spartan'10 software and HOMO energies obtained after geometry optimisation using B3LYP/6-31G\* methodology (gas phase, 298 K, orbitals and energies selected). Minimum energy structures were confirmed by a lack of imaginary frequency. HOMO energies are listed in **Table S2** alongside observed conversions.

**Table S2:** Difluorocyclopropanation conversion and calculated HOMO energies for (hetero)aromatic alkenoates.

| $\text{R}^1$<br>$\text{R}^1 =$ | Percentage Conversion (%) | HOMO Energy (eV) |
|--------------------------------|---------------------------|------------------|
| 2-Pyridyl                      | 0                         | -6.70            |
| 2-Thiazolyl                    | 0                         | -6.47            |
| Piperonyl                      | 50                        | -5.68            |
| Phenyl                         | 37                        | -6.36            |
| 2-Furyl                        | 66                        | -5.96            |
| 2-Thiophenyl                   | 77                        | -6.10            |
| 3-Methyl-2-furyl               | 80                        | -5.84            |
| 2-NBoc-Pyrrolyl                | 92                        | -5.68            |

Both 2-pyridyl and 2-thiazoyl failed to show any reactivity and this could be due to their low calculated HOMO energies of -6.70 eV and -6.47 eV, respectively. However, the moderate conversion observed with piperonyl **13d** is not consistent with its higher HOMO energy of -5.68 eV, suggesting that alternative side reactions occur with these substituents. The remaining compounds show a slight trend relating percentage conversion with calculated HOMO energy but the data is not sufficient to make prediction on whether substrates will successfully undergo difluorocyclopropanation.

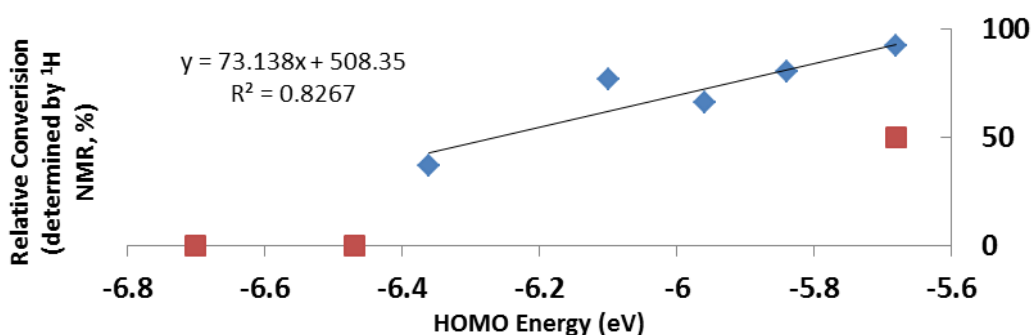

**Figure S10:** Plot of % conversion in difluorocyclopropanation reaction against calculated HOMO energies (eV) (data represented in Table SXX).  $\blacklozenge$  = substrates which show slight trend,  $\blacksquare$  = substrates which do not fit the trend.

## Difluorocyclopropanation Functional Group Tolerance: Additive Experiment

We found that an indication of functional group tolerance was to measure the effects of heterocycles as additives in the previously successful difluorocyclopropanation of cinnamyl acetate **14b** (Table S3, Entry 1).<sup>S20</sup>

**Table S3:** Effect of Heterocyclic Additives on the Difluorocyclopropanation of Cinnamyl Acetate **14b**.

Reaction scheme showing the difluorocyclopropanation of cinnamyl acetate (**14b**) to product **S18**. Reagents: MDFA (2.5 eq.), TMSCl (2.5 eq.), KI (2.8 eq.), Diglyme (1.17 eq.), Additive (X eq.), 120 °C, 24 h.

| Entry <sup>[a]</sup> | Additive                  | Equivalents | Conversion to <b>S18</b> (%) <sup>[b]</sup> |
|----------------------|---------------------------|-------------|---------------------------------------------|
| 1 <sup>[c]</sup>     | none                      | n.a.        | 100                                         |
| 2                    | Pyridine                  | 1.0         | 0                                           |
| 3                    | Pyridine                  | 0.5         | 4                                           |
| 4 <sup>[c]</sup>     | Pyridine                  | 0.1         | 85                                          |
| 5                    | Thiazole                  | 0.5         | 34                                          |
| 6                    | Pyridine-N-oxide          | 0.5         | 14                                          |
| 7                    | N-Boc-pyrrole             | 0.5         | 88                                          |
| 8                    | Methyl-3-methyl-2-furoate | 0.5         | 100                                         |
| 9                    | 1,3-Benodioxole           | 0.5         | 50                                          |

<sup>[a]</sup> All reactions run on an 8 mmol scale with respect to **14b** unless otherwise stated. <sup>[b]</sup> Determined by <sup>1</sup>H NMR. <sup>[c]</sup> 16 mmol scale.

We observed that 1.0 and 0.5 equivalents of pyridine completely hindered the trapping of difluorocarbene with **14b** (Table S3, Entries 2-3); even small quantities of the heterocycle (10 mol%) lowered the conversion to **S18** by 15% (Table S3, Entry 4). Addition of thiazole to the reaction had a smaller effect, but a low 34% conversion confirmed that both of these

heterocycles do suppress the difluorocarbene-alkene reaction (**Table S3**, Entry 5). DeNinno and co-workers reported similar issues when the difluorocyclopropanation of **S19** gave a poor 22% yield, but shielding the pyridine nitrogen using *ortho*-bromo substitution gave a highly improved 78% yield from **S20** (**Scheme S6**).<sup>S36</sup>

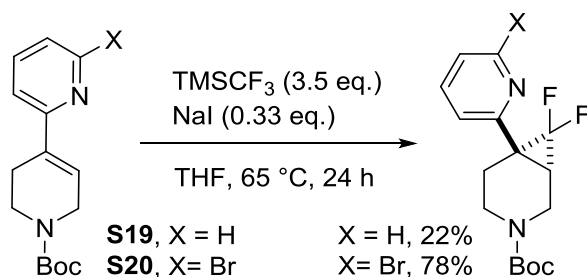

**Scheme 7:** Increased difluorocyclopropanation yields by blocking aromatic nitrogen atom.<sup>S36</sup>

We hoped that blocking the nitrogen atom directly via the N-oxide would help the difluorocyclopropanation reaction in a similar way and potentially give access to a more reactive VCPR precursor. However, since a poor 14% conversion to **15b** was observed when pyridine-N-oxide was used as an additive, no further synthetic investigations were carried out (**Table S3**, Entry 6). Heterocycles which were tolerated during the difluorocyclopropanation of alkenoate **13**, gave higher 88-100% conversions to **15b** when used as additives (**Table S3**, Entries 7-8). This experimental approach of assessing functional group tolerance was a more effective way to prioritising the synthesis of heteroaromatic olefins and can be used to assess which substrates will be tolerated during difluorocyclopropanation without competing side reactions.

**Methodology:** An oven dried two-necked round bottom flask containing potassium iodide (3.68 g, 22.2 mmol) was sealed with a SubaSeal, and the salt was stirred and lightly flame dried under an atmosphere of argon. A low boiling point water condenser with a gas outlet connected to an argon/vacuum manifold was attached and the reaction flask and the atmosphere were purged three times. Cinnamyl acetate **14b** (1.34 mL, 8.0 mmol) followed by a solution of **additive (X eq.)** in diglyme (1.3 mL) were added and the resulting suspension was heated to 120 °C. Once the reaction temperature had been reached, TMSCl (2.6 mL, 19.7 mmol) and MDFA (2.6 mL, 19.7 mmol) were added dropwise in that order. After 5 hours, the reaction mixture had evaporated to dryness and a further portion of diglyme (1.3 mL) was added. The mixture was stirred for a further 19 hours (total reaction

time of 24 hours). The resulting brown solution was cooled to room temperature and the reaction mixture was quenched with aqueous NaCl (10 mL) and diethyl ether (10 mL) was added. The organic layer was separated and the aqueous layer was extracted with diethyl ether (2 x 10 mL). The original organic layer and the extracts were combined, dried (MgSO<sub>4</sub>) and concentrated under reduced pressure to remove volatiles. The <sup>1</sup>H NMR spectrum of the resulting brown oil was used to determine conversion of **13b** to difluorocyclopropyl **15b** and the results highlighted in **Table S3**.



## Crude Spectra for Low Temperature Rearrangement Precursors

Spectra below highlight the results of oxidation/Wittig chemistry on highly reactive heteroaromatic substituents.

- Furyl Alcohol **17a** with (ethoxycarbonylmethylene)triphenylphosphorane

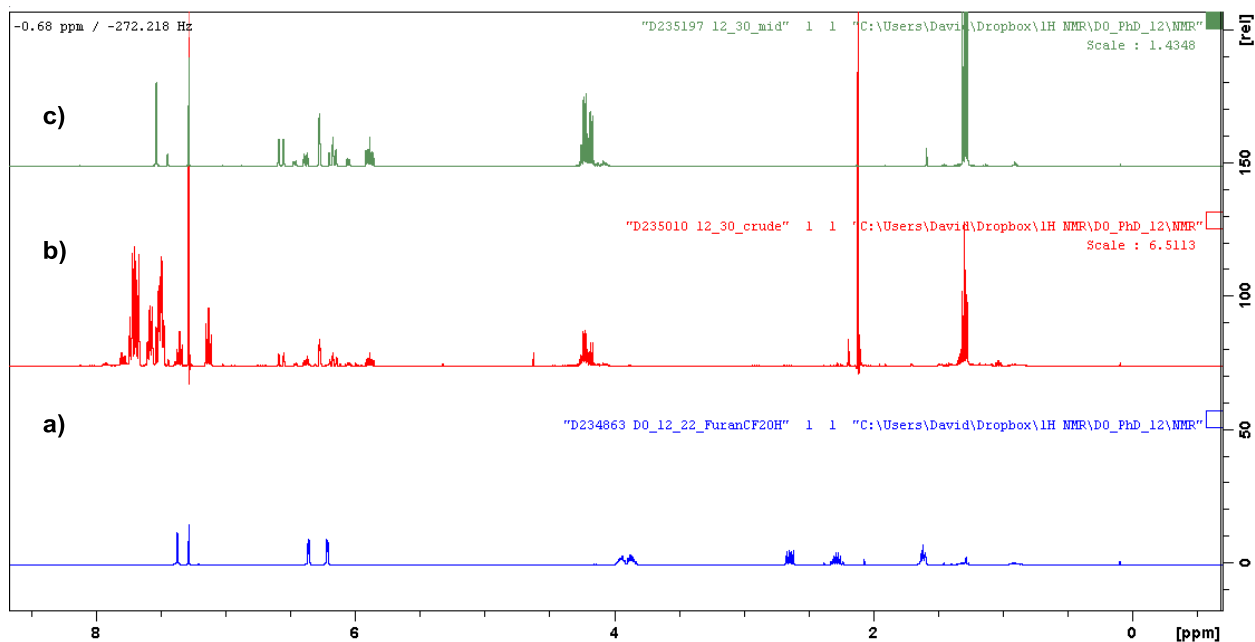

**Figure S11:** a) Isolated  $^1\text{H}$  NMR for alcohol **17a** b) Crude  $^1\text{H}$  NMR after oxidation/Wittig reaction showing no evidence of peaks relating to cyclopropane proton atoms. c)  $^1\text{H}$  NMR of main fraction isolated from first purification on silica.

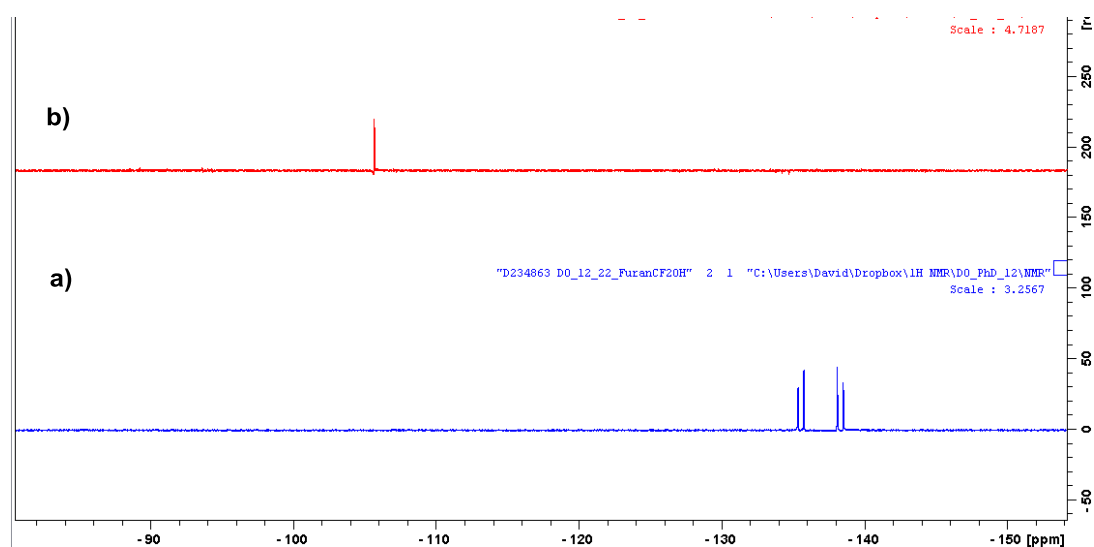

**Figure S12:** a) Isolated  $^{19}\text{F}$  NMR for furyl alcohol **17a** b)  $^{19}\text{F}$  NMR of main fraction isolated from first purification after oxidation/Wittig.

- Thiophenyl alcohol **17c** with (ethoxycarbonylmethylene)triphenylphosphorane

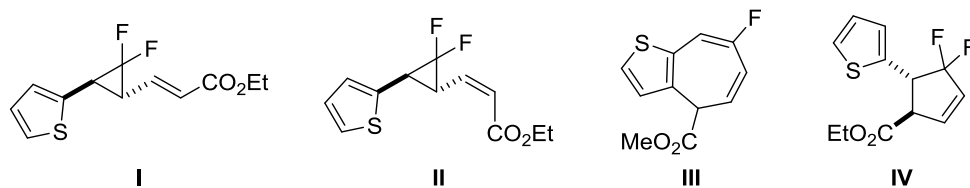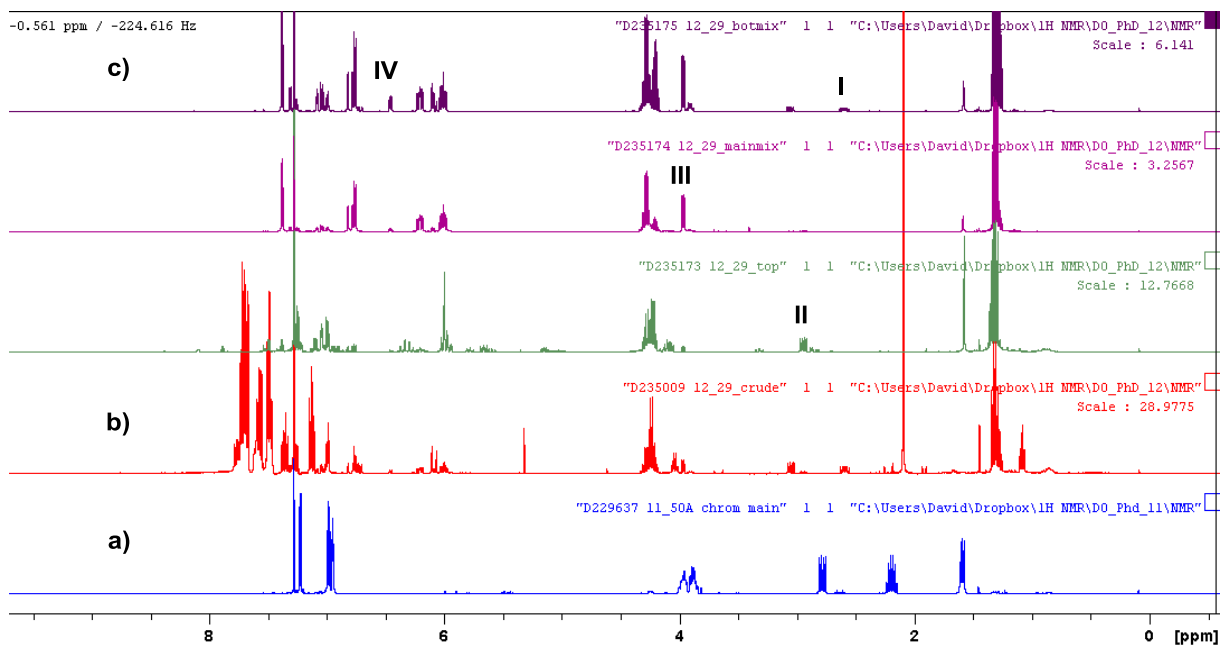

**Figure S13:** a)  $^1\text{H}$  NMR of isolated thiophenyl alcohol **17c**. b) Crude  $^1\text{H}$  NMR after oxidation/Wittig reaction. c) Three different fractions isolated after first purification on silica. (Assignment of crude spectra based on previous knowledge on *E/Z* cyclopropane isomers and  $^{19}\text{F}$  NMR data for products which was confirmed on isolation of products).

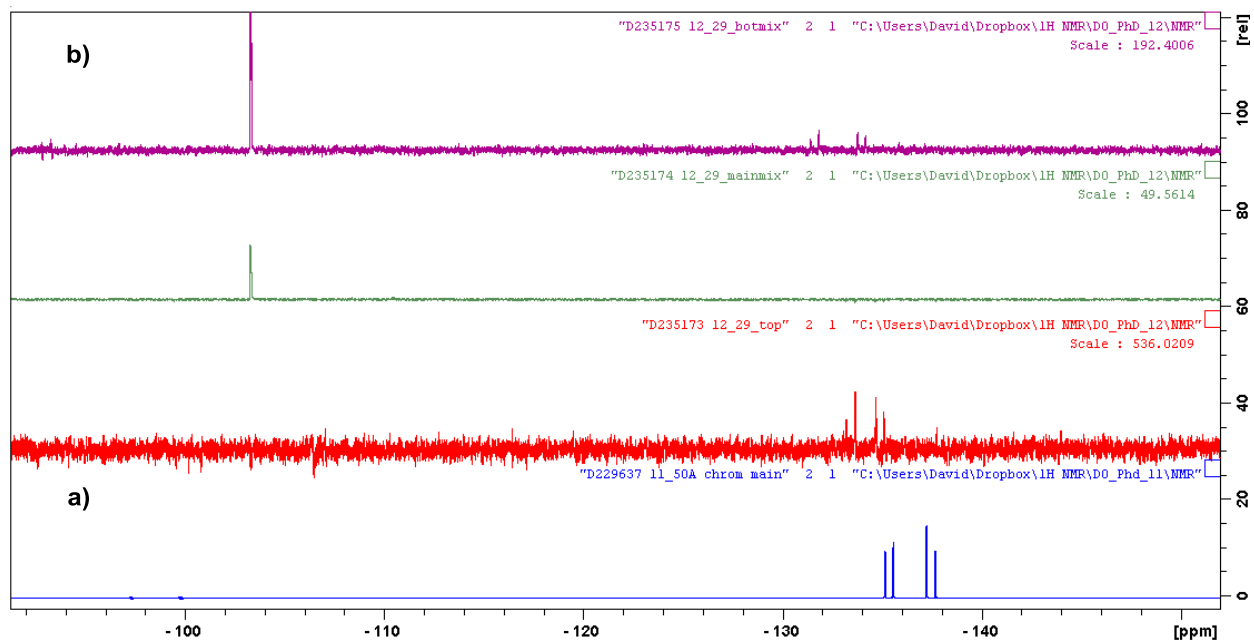

**Figure S14:** a) Crude  $^{19}\text{F}$  NMR for isolated thiophenyl alcohol **17c**. b)  $^{19}\text{F}$  NMR for isolated fractions highlighted in **Figure S13** from first purification on silica.

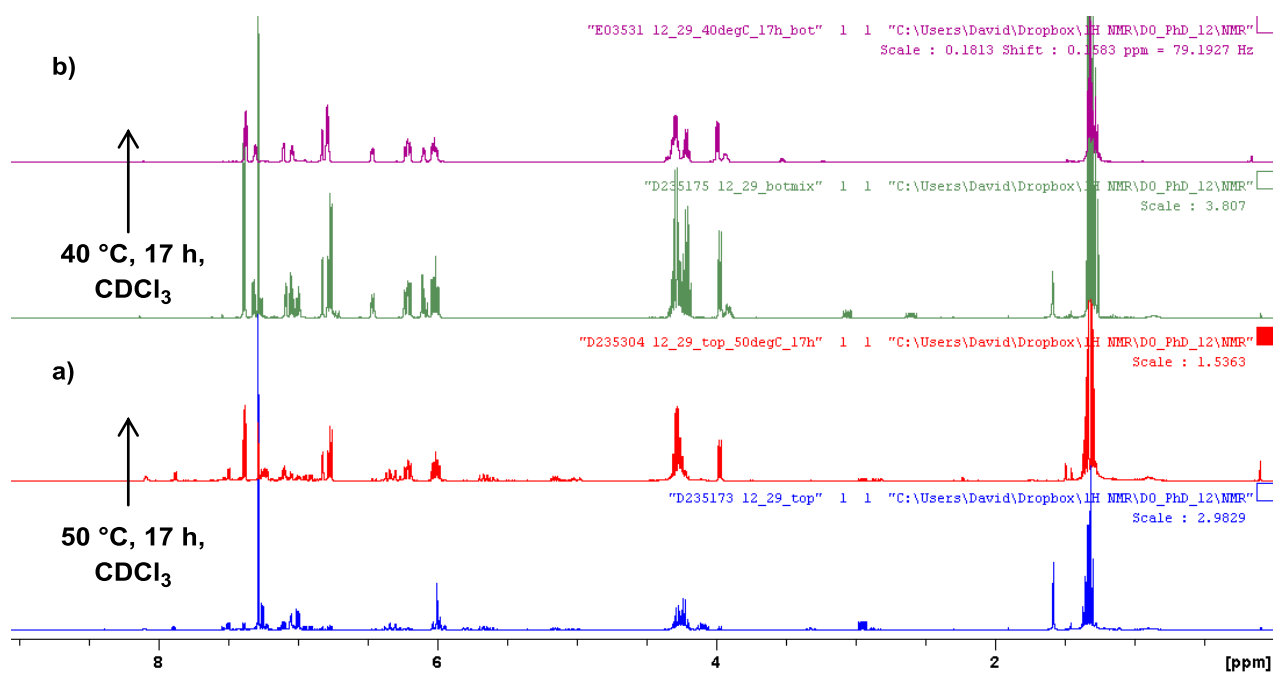

**Figure S15:** a) Thermolysis of < 10 mg sample containing *Z*-thiophenyl **24b** at 50 °C for 17 hours resulting in full conversion to heptadiene **29a** alongside other side products. b) Thermolysis of 420 mg sample containing *E*-thiophenyl **24a** at 40 °C for 17 hours resulting in full conversion to a mixture of VCPR and [3,3] product.

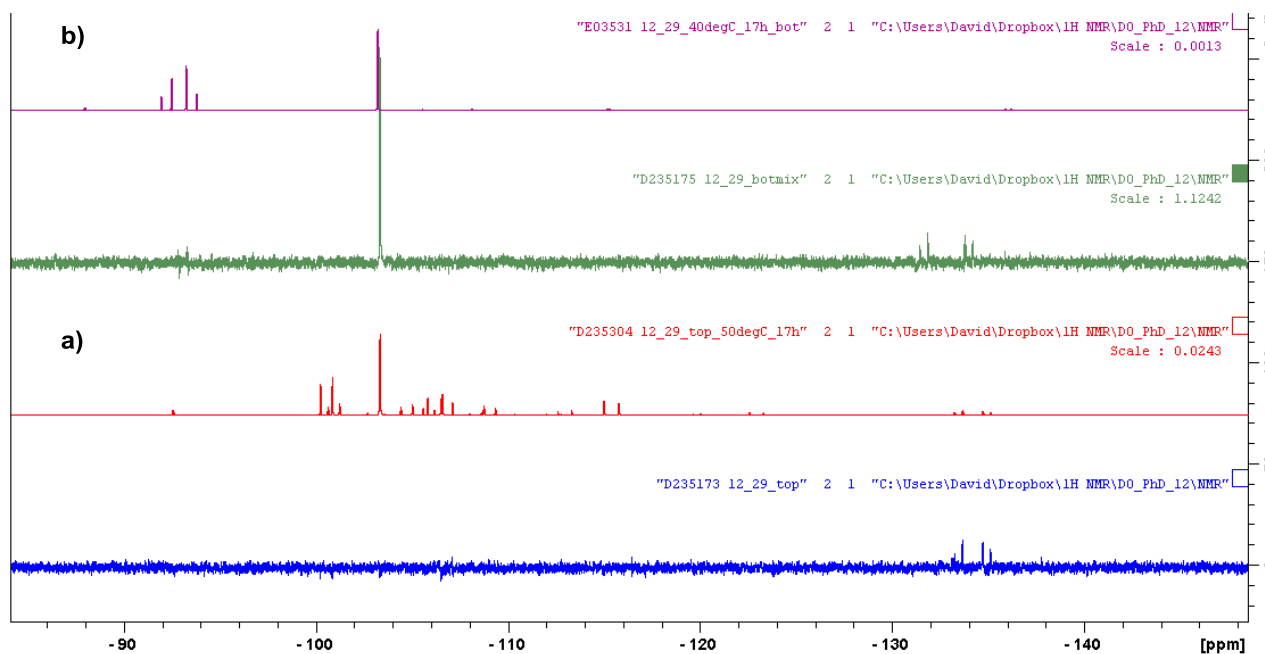

Figure S16: Corresponding  $^{19}\text{F}$  NMR for  $^1\text{H}$  NMR discussed in Figure S15.

- Furyl alcohol **17a** with (carbethoxyethylidene)triphenylphosphorane

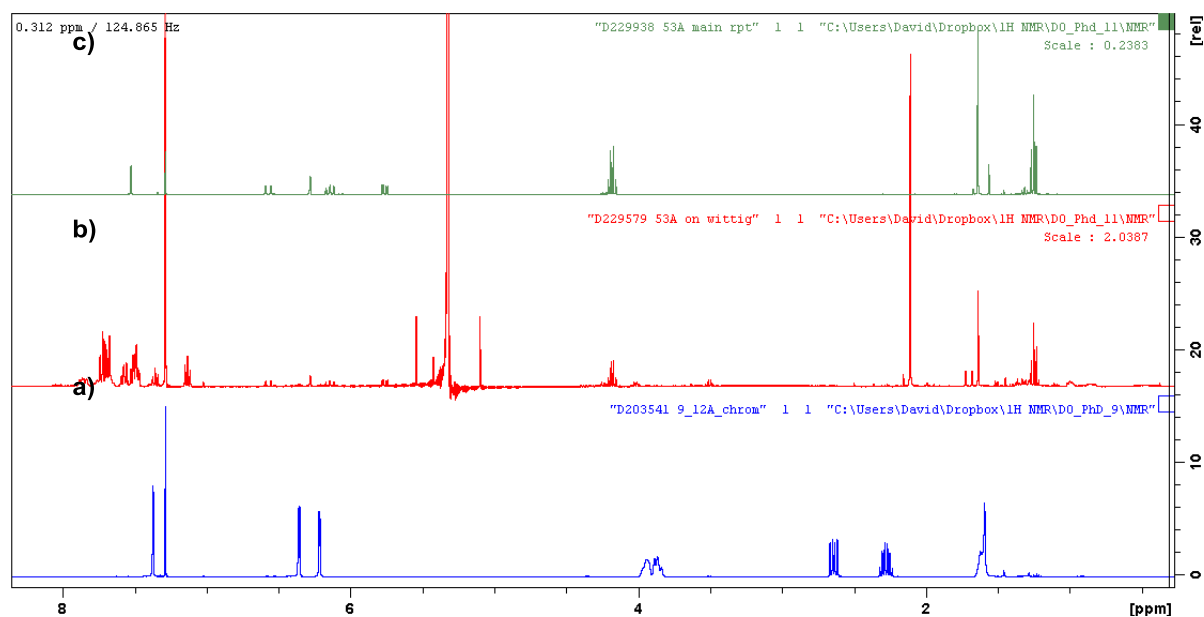

Figure S17: a)  $^1\text{H}$  NMR of isolated furyl alcohol **17a**. b) Crude  $^1\text{H}$  NMR after oxidation/Wittig with (carbethoxyethylidene)triphenylphosphorane c)  $^1\text{H}$  NMR after 1<sup>st</sup> purification on silica.

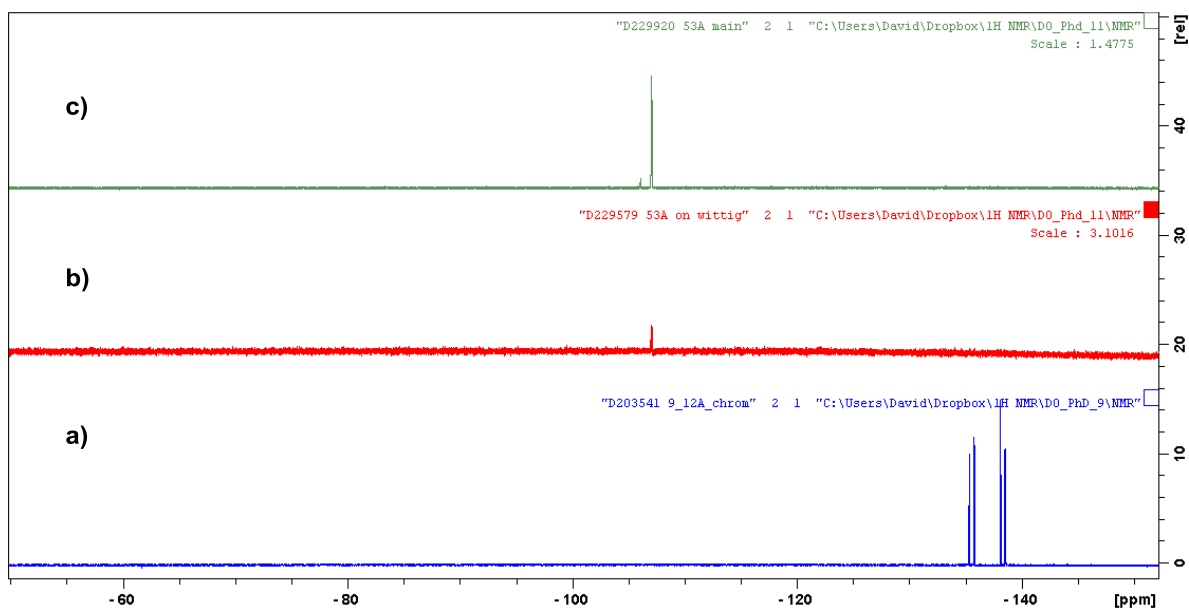

**Figure S18:** a)  $^{19}\text{F}$  NMR for isolated furyl alcohol **17a** b) Crude  $^{19}\text{F}$  NMR after oxidation/Wittig with (carbethoxyethylidene)triphenylphosphorane c)  $^{19}\text{F}$  NMR after 1<sup>st</sup> purification on silica.

- Thiophenyl alcohol **17c** with (carbethoxyethylidene)triphenylphosphorane

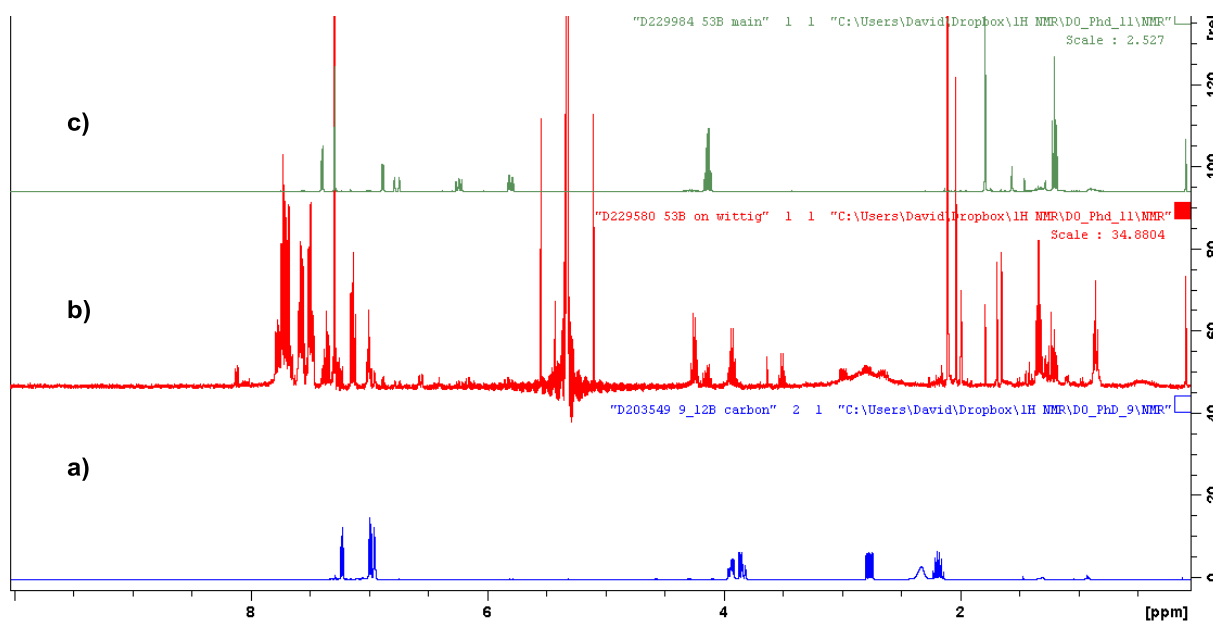

**Figure S19:** a)  $^1\text{H}$  NMR for isolated thiophenyl alcohol **17c** b) Crude  $^1\text{H}$  NMR after oxidation/Wittig with (carbethoxyethylidene)triphenylphosphorane c)  $^1\text{H}$  NMR after 1<sup>st</sup> purification on silica.

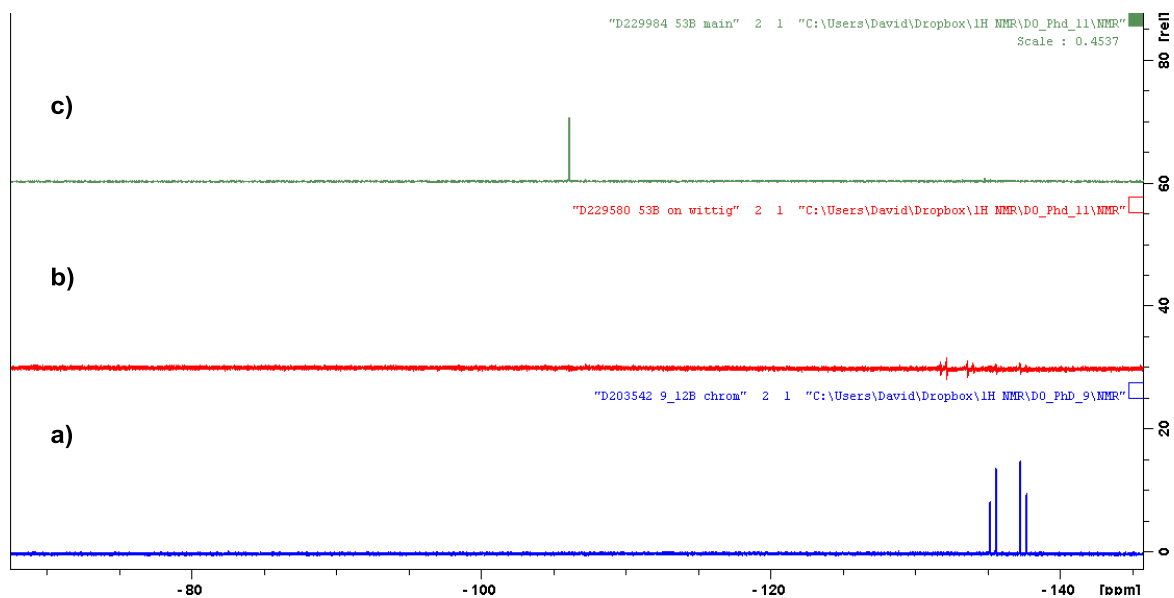

**Figure S20:** a)  $^{19}\text{F}$  NMR for isolated thiophenyl alcohol **17c** b) Crude  $^{19}\text{F}$  NMR after oxidation/Wittig with (carbethoxyethylidene)triphenylphosphorane c)  $^{19}\text{F}$  NMR after 1<sup>st</sup> purification on silica.

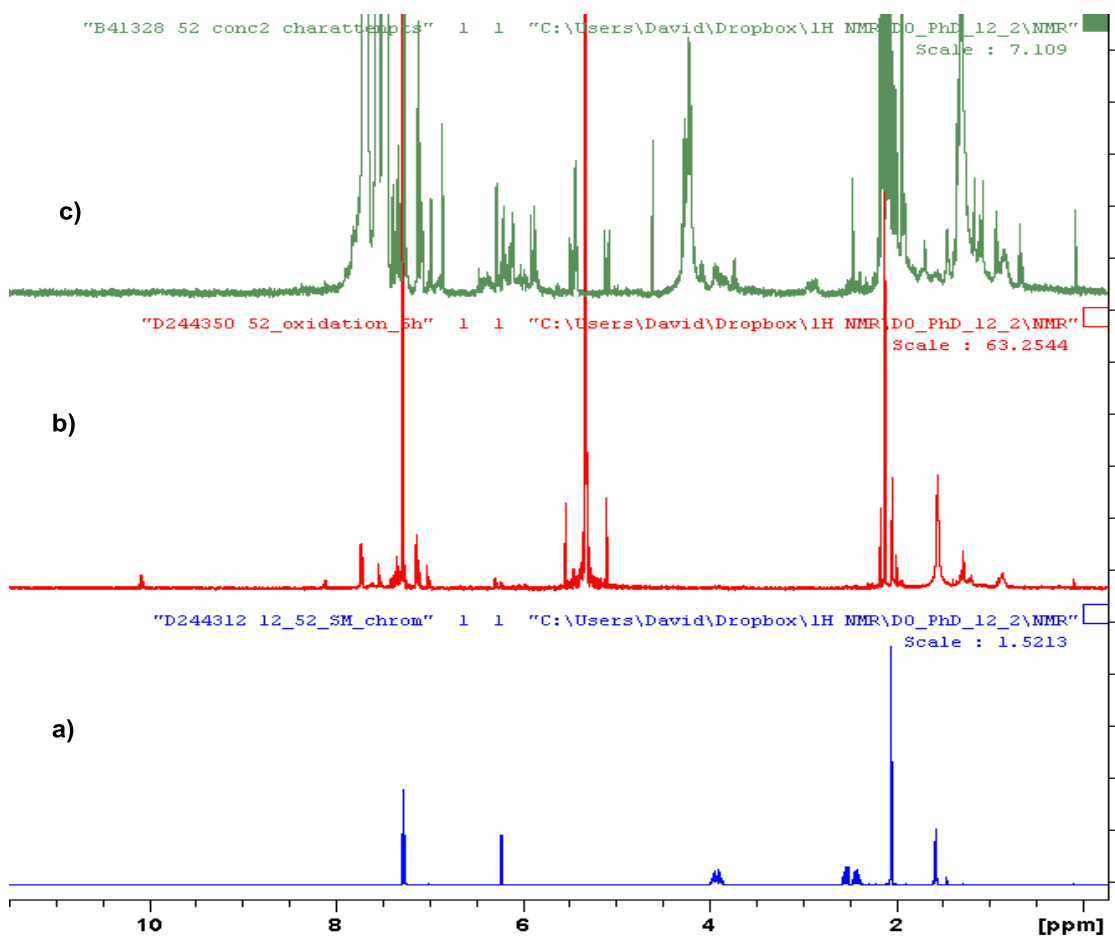

**Figure S21:**  $^1\text{H}$  NMR for isolated 3-methyl-furyl alcohol **17h** b) Crude  $^1\text{H}$  NMR after oxidation with (ethoxycarbonylmethylene)triphenylphosphorane c)  $^1\text{H}$  NMR after olefination and concentration of reaction mixture.

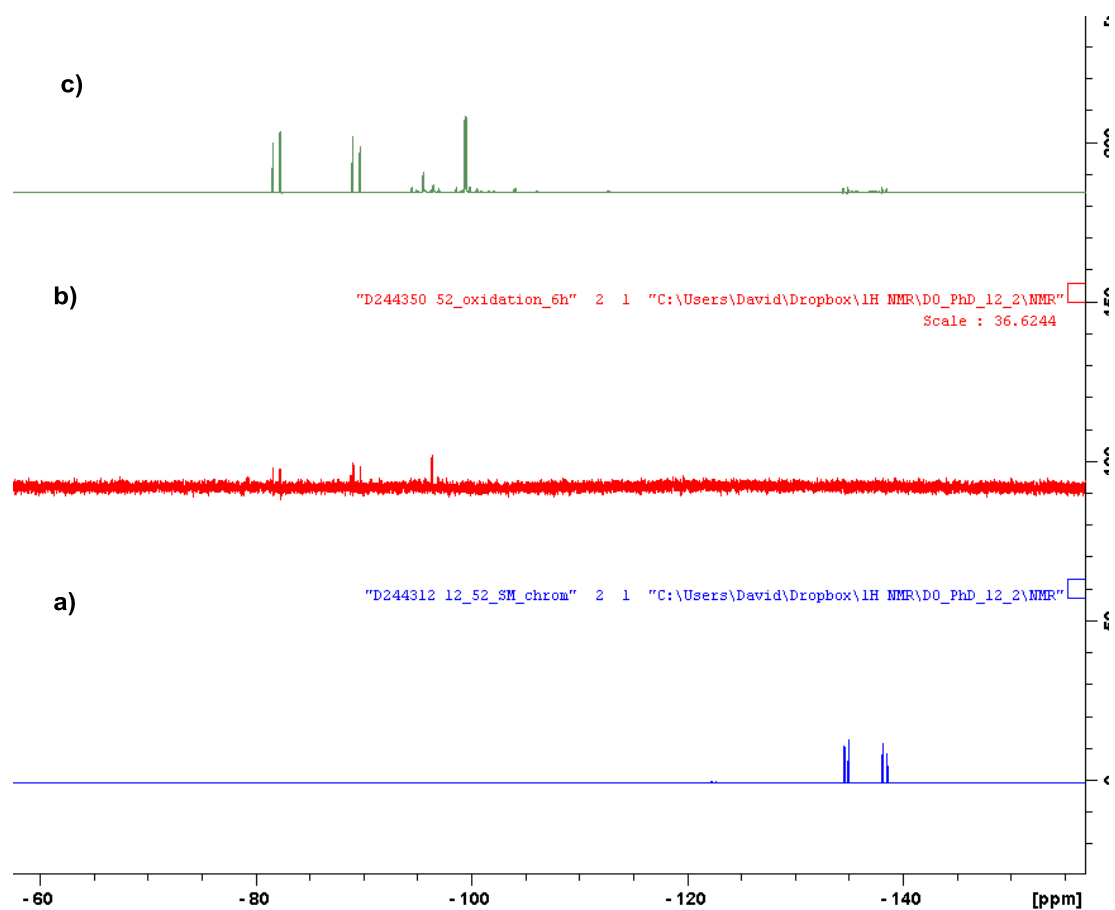

**Figure S22:**  $^{19}\text{F}$  NMR for isolated 3-methyl-furyl alcohol **17h** b) Crude  $^{19}\text{F}$  NMR after oxidation with (ethoxycarbonylmethylene)triphenylphosphorane c)  $^{19}\text{F}$  NMR after olefination and concentration of reaction mixture.

## Rearrangement of Isolated VCP – Crude Spectra

- (*E*)-Weinreb Amide **19a**

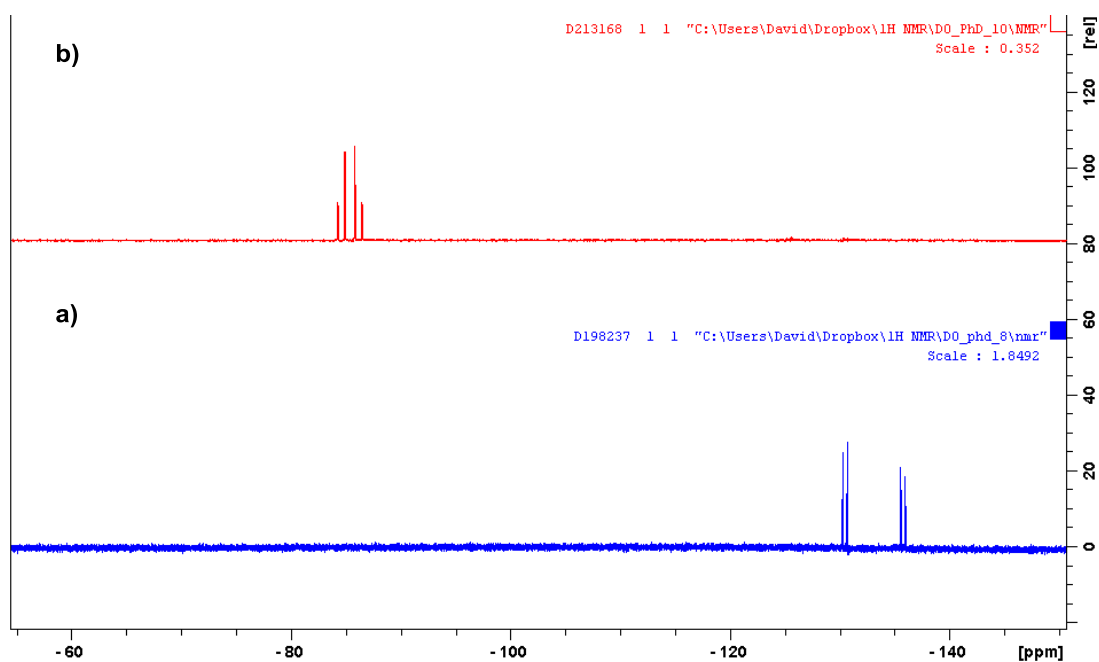

**Figure S23:** a)  $^{19}\text{F}$  NMR of isolated *E*-Weinreb amide VCP **19a**. b) Crude  $^{19}\text{F}$  NMR for rearrangement of **19a** at 95 °C for 17 hours.

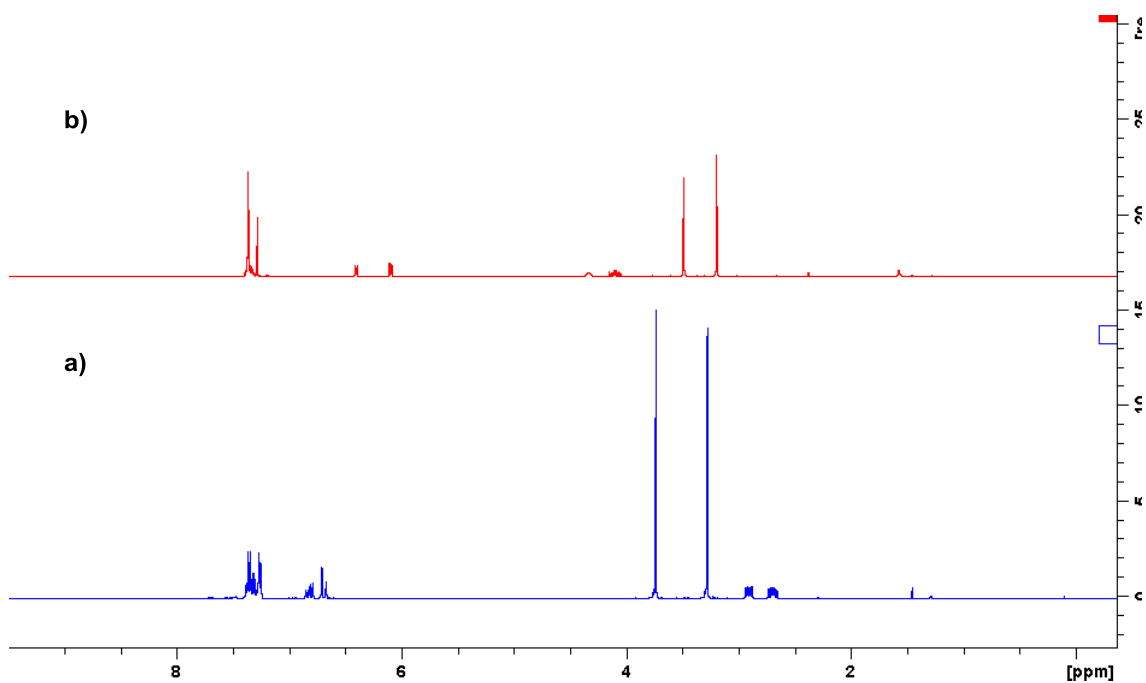

**Figure S24:** a)  $^1\text{H}$  NMR of isolated *E*-Weinreb amide VCP **19a**. b) Crude  $^1\text{H}$  NMR for rearrangement of **19a** at 95 °C for 17 hours.



- (Z)-Weinreb Amide (19b)

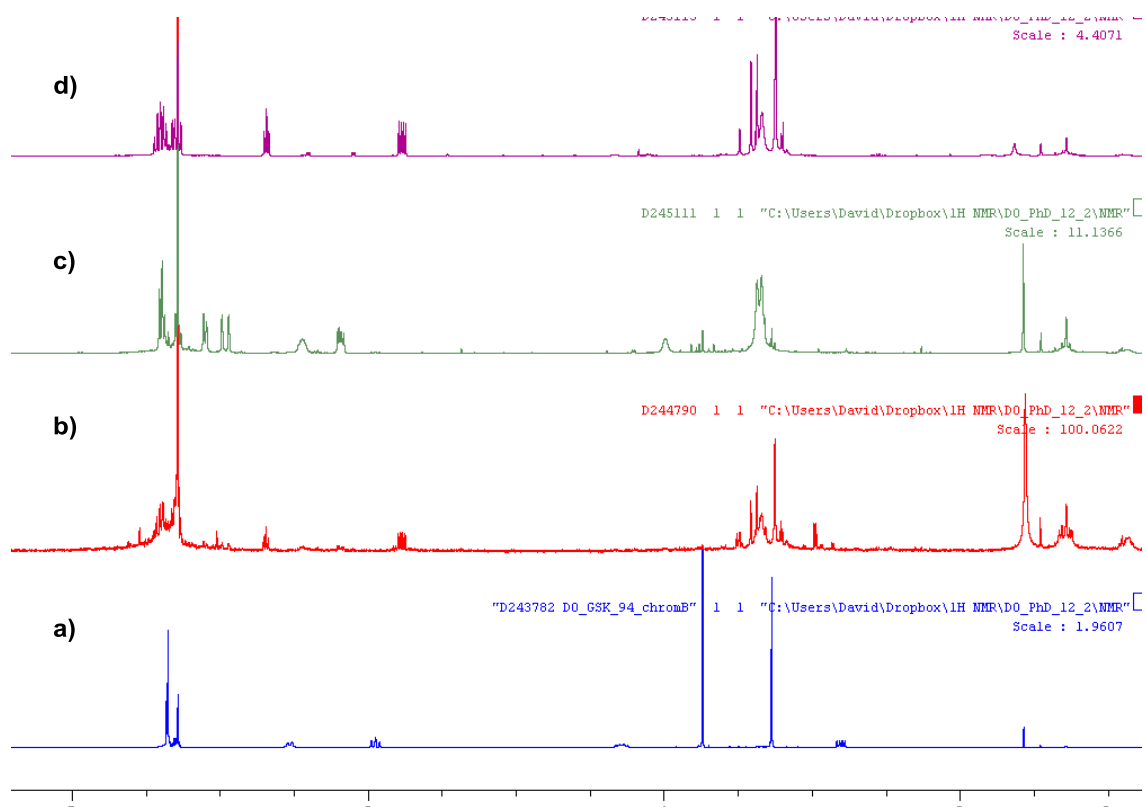

**Figure S25:** a)  $^1\text{H}$  NMR of isolated ZWeinreb amide VCP **19b**. b) Crude  $^1\text{H}$  NMR of **19b** after rearrangement at 165 °C for 17 hours (silica pad used to remove  $\text{Ph}_2\text{O}$  solvent c) and d)  $^1\text{H}$  NMR of isolated products after chromatography.

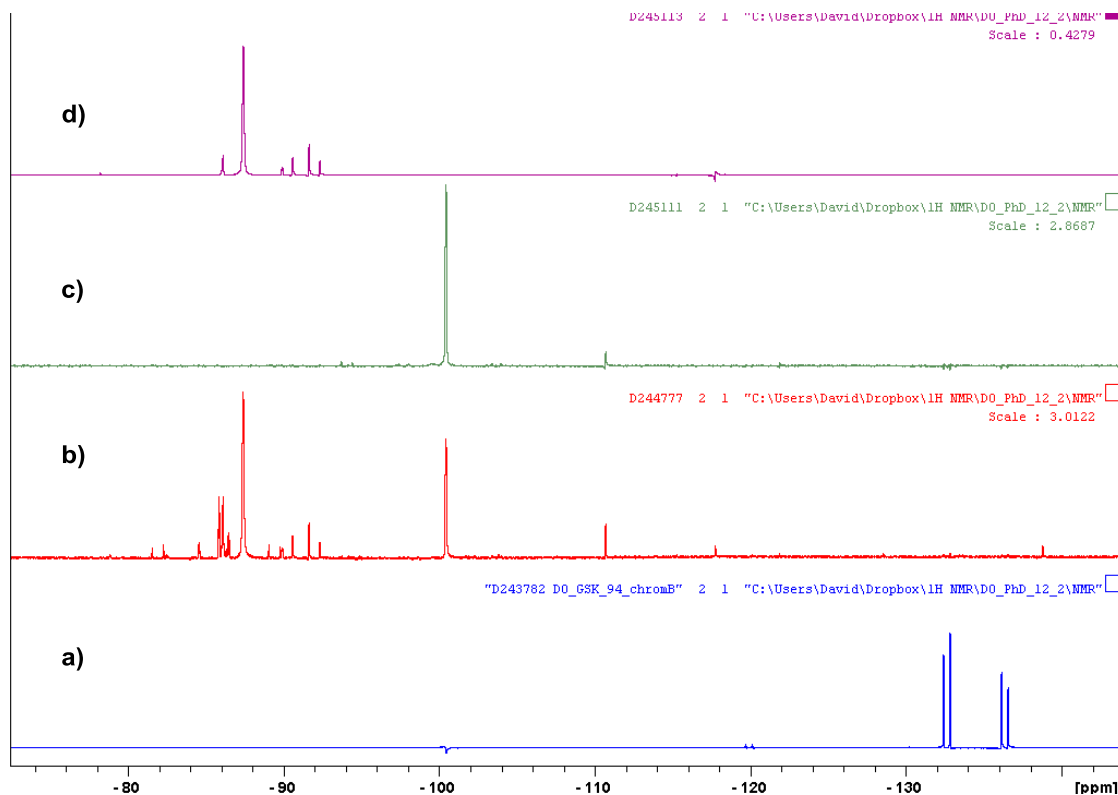

**Figure S26:** a)  $^{19}\text{F}$  NMR of isolated Z-Weinreb amide VCP **19b**. b) Crude  $^{19}\text{F}$  NMR of **19b** after rearrangement at 165 °C for 17 hours (silica pad used to remove  $\text{Ph}_2\text{O}$  solvent). c) and d)  $^{19}\text{F}$  NMR of isolated products after chromatography.

- **$\alpha$ -Methyl Ester (20a)**

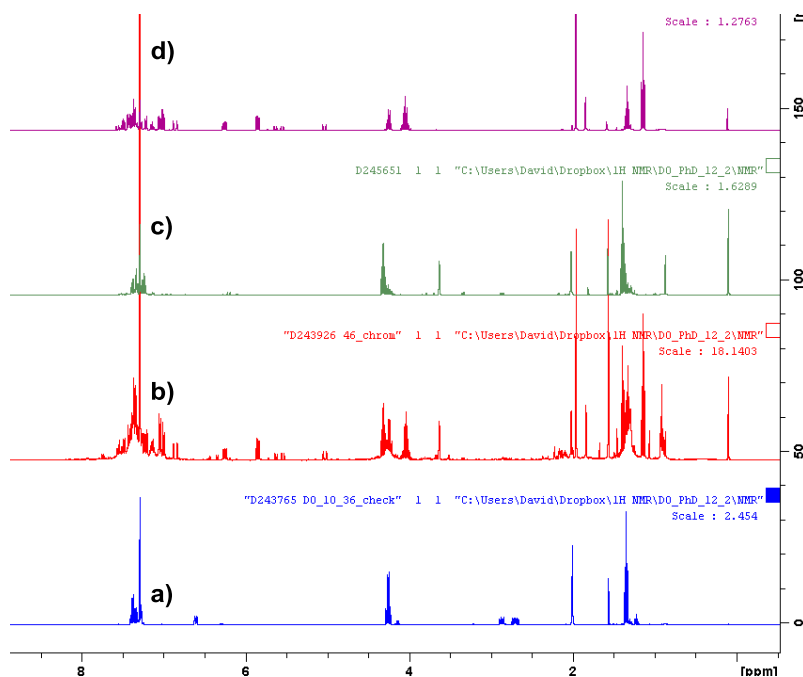

**Figure S27:** a)  $^1\text{H}$  NMR of isolated alkenoate **20a** b) Crude  $^1\text{H}$  NMR of **20a** after rearrangement at 155 °C for 17 hours (silica pad used to remove  $\text{Ph}_2\text{O}$  solvent). c) and d)  $^1\text{H}$  NMR of isolated products after chromatography.

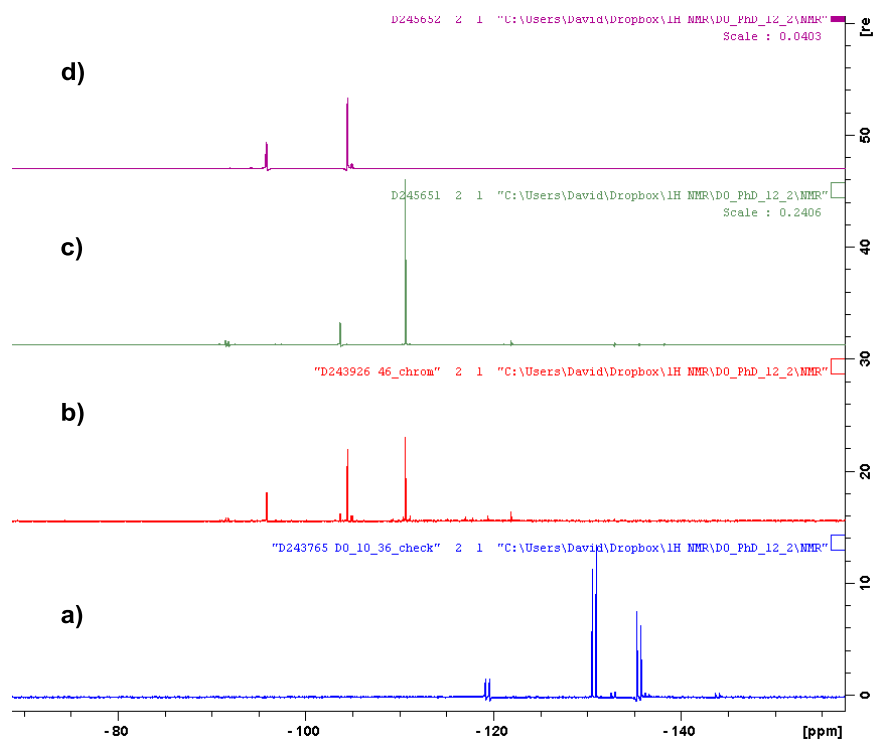

**Figure S28:** a)  $^{19}\text{F}$  NMR of isolated alkenoate **20a**. b) Crude  $^{19}\text{F}$  NMR of **20a** after rearrangement at 155 °C for 17 hours (silica pad used to remove  $\text{Ph}_2\text{O}$  solvent). c) and d)  $^{19}\text{F}$  NMR of unknown products after chromatography.

- ***E/Z*-Cyano VCP mixture (**21a/21b**)**

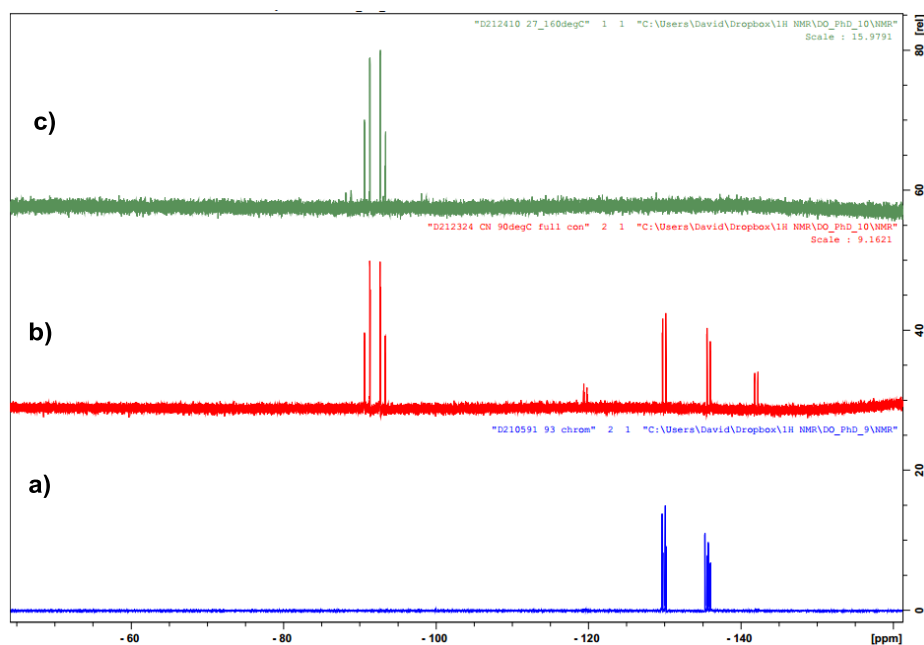

**Figure S29:** a)  $^{19}\text{F}$  NMR spectra of **21a/21b** mixture. b)  $^{19}\text{F}$  NMR spectra for the rearrangement of **21a/21b** at 90 °C for 17 h resulting in full conversion of **21a** to difluorocyclopentene **37** and only cyclopropane stereoisomeration of **21b** to **42**. c)  $^{19}\text{F}$  NMR spectra after the rearrangement of crude mixture in (b) at 160 °C for 17 h.

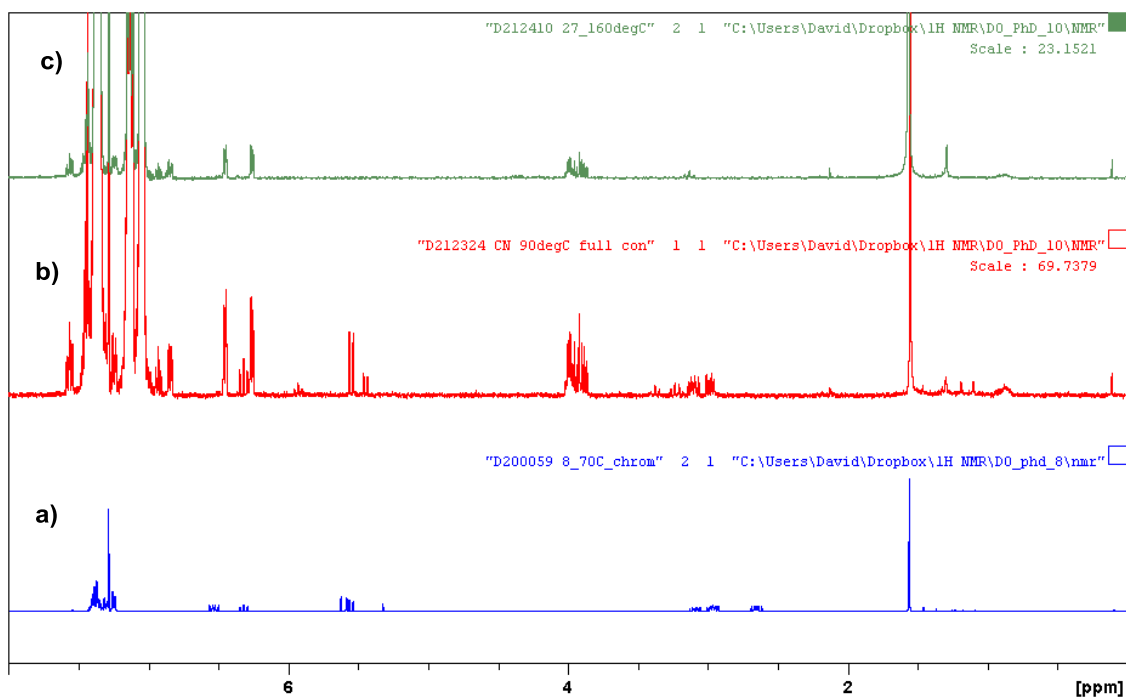

Figure S30: Corresponding  $^1\text{H}$  spectra for mixtures in Figure 29.

- Piperonyl 22a

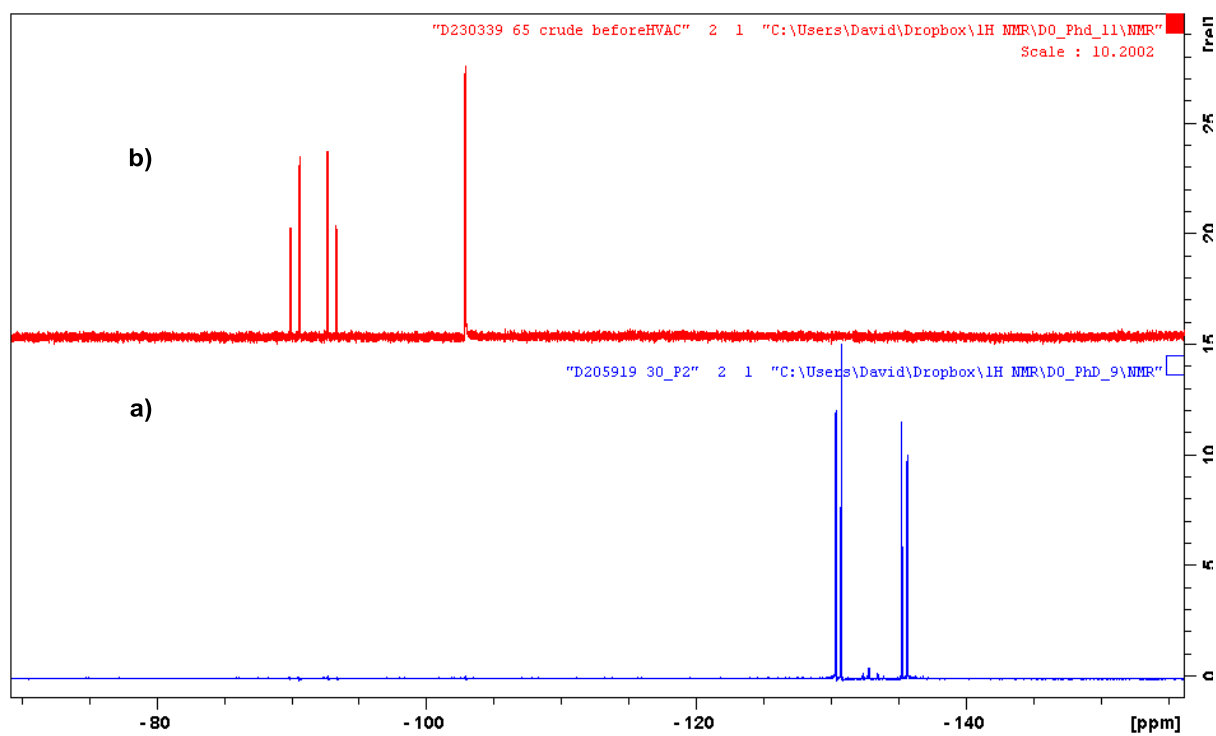

Figure S31: a)  $^{19}\text{F}$  NMR of isolated piperonyl VCP 22a. b)  $^{19}\text{F}$  NMR of crude reaction mixture after rearrangement at 70 °C for 17 h.

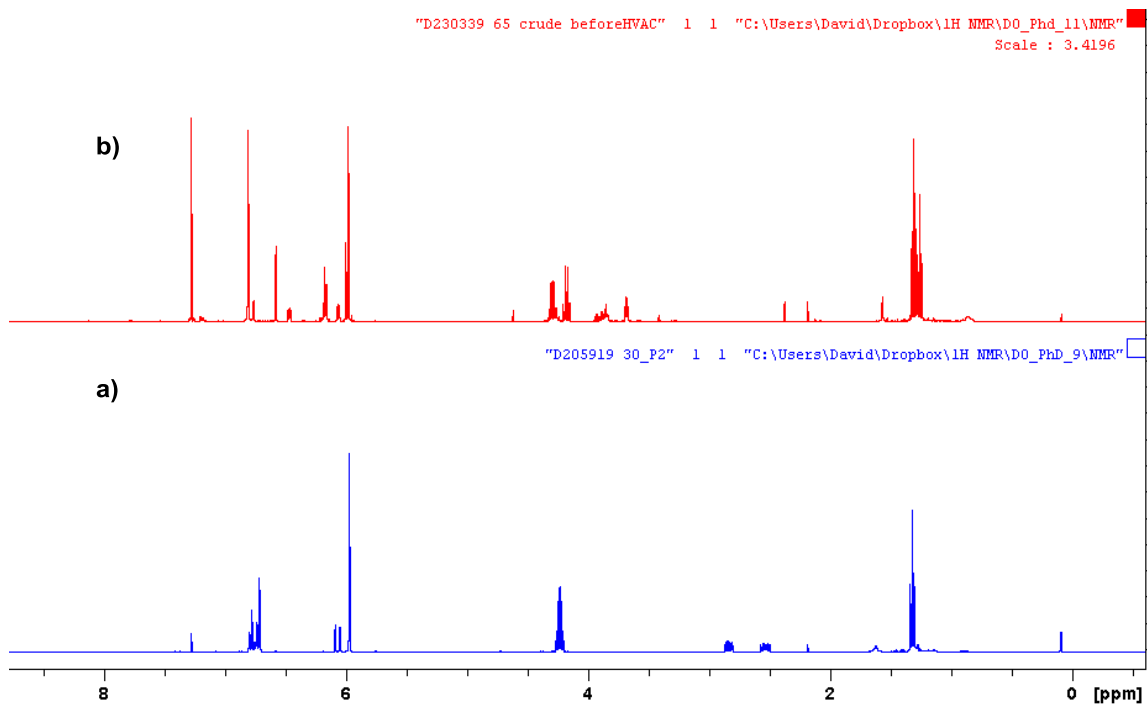

**Figure S32:** Corresponding  $^1\text{H}$  NMR spectra for  $^{19}\text{F}$  NMR discussed in **Figure S31**.

- **Non-fluorinated 47**

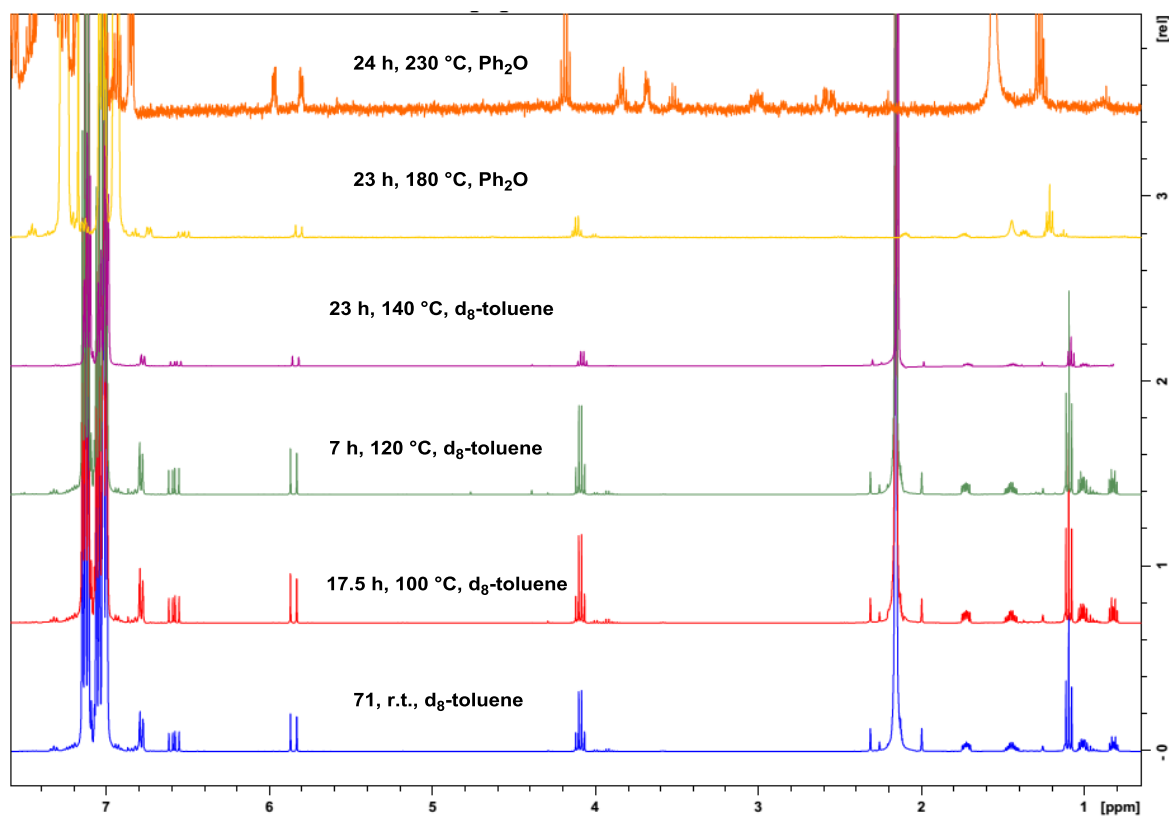

**Figure S33:** Rearrangement temperature screening show temperatures  $> 180\text{ }^\circ\text{C}$  are required for the rearrangement of non-fluorinated VCP **47**.

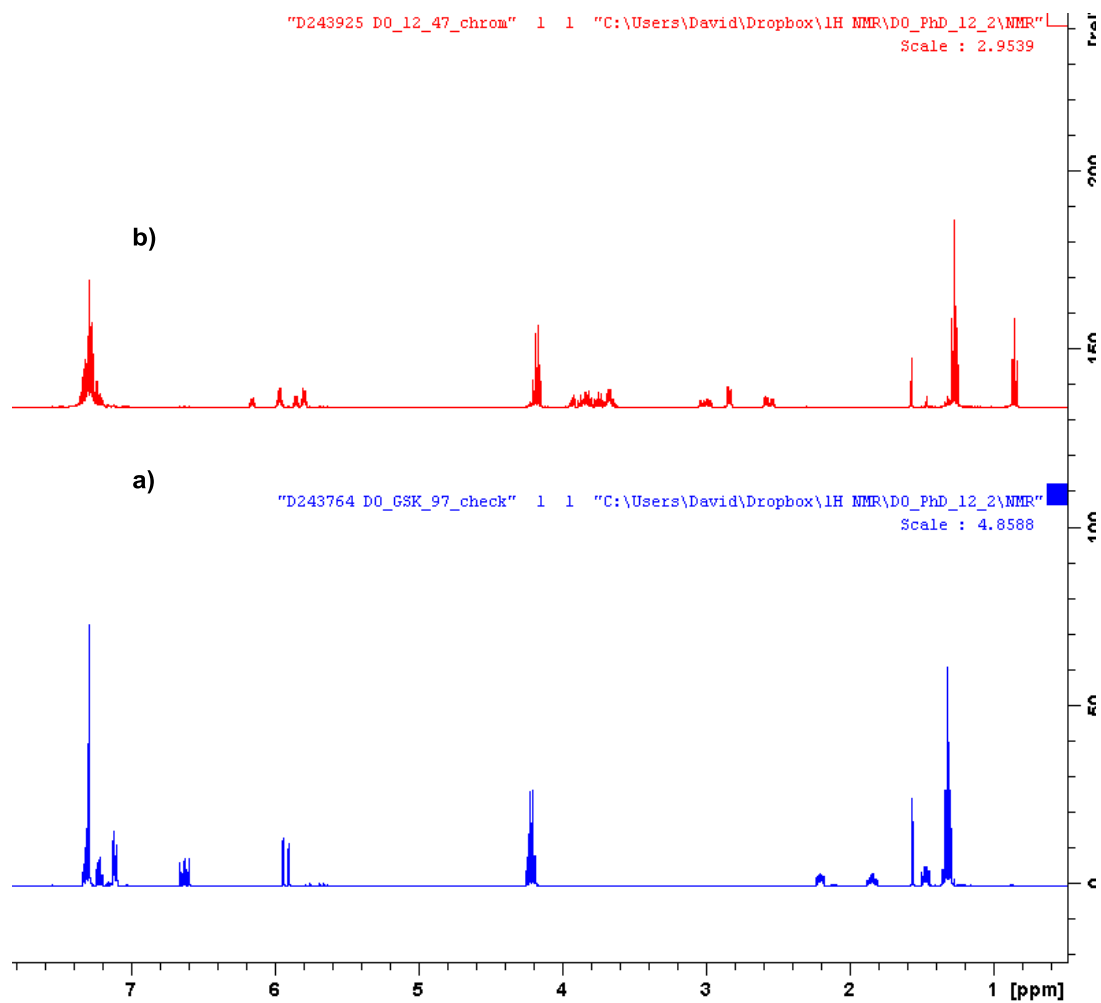

**Figure S34:** a)  $^1\text{H}$  NMR for isolated alkenoate **47** b) Crude  $^1\text{H}$  NMR for the rearrangement of isolated non-fluorinated **47** at 210 °C for 17 h (after removal of  $\text{Ph}_2\text{O}$  solvent).

## Piperonyl 22a Rearrangement: Kinetic Modelling

### VT <sup>19</sup>F NMR Procedure for Piperonyl 22a

<sup>19</sup>F NMR spectra were acquired on a Brüker AV400 instrument equipped with a QNP-z probe and a temperature control unit. Data was collected at 376 MHz using 8 scans per data point. Settings for spectra acquisition were as follows: NS = 8 scans; D1 = 1.5 s; SW = 199.77 ppm and O1P = -100 ppm. The samples were held at reaction temperature for the duration of the experiment: 343, 353, 363 and 373 K for Arrhenius plots with **22a**. d8-Toluene was purchased from and Sigma Aldrich and used as received. A solution of VCPR precursor (typically 0.13-0.15 M) was made up in a clean, dry NMR tube and the tube was capped. The tube was inserted into the magnet and the instrument's internal temperature was set to the desired reaction temperature and allowed to equilibrate (approx. 2 minutes heating time). The sample was then analysed at appropriate intervals using a Brüker Topspin automated script, *multi\_zgvd2b*. Samples were automatically shimmed using *topshim* between acquisitions. In order to obtain sufficient data points for kinetic analysis; the above procedure was altered slightly for rearrangements at temperatures of 363 and 373 K. Reactions at both temperatures used *noshim* to cancel any shimming between spectra acquisition, allowing time points to be taken every 40 or 25 seconds (respectively) instead of 60 seconds with shimming between samples. A sacrificial sample was used to shim the reaction mixture at 373 K. This was ejected and replaced with a fresh sample which was locked and followed at 25 second intervals (*multi\_zgvd2b*) after solvent locking. This procedure allowed the first time point to be taken after 50 seconds instead of 180 seconds. Relative percentages were determined by averaging the manual integration for each compound on the resulting spectra using proprietary software.

## Example Spectra:

22a decomposition at 373 K: 123 seconds

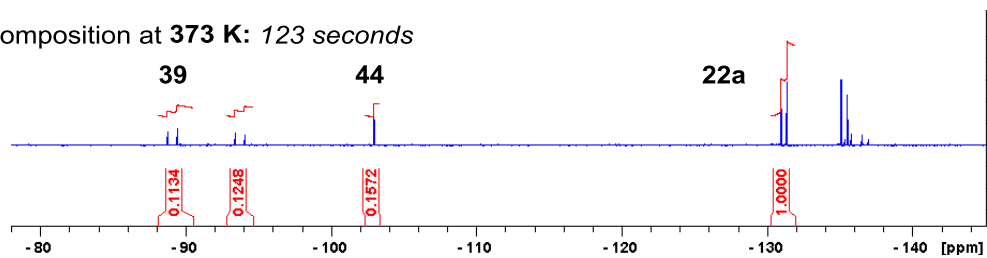

22a decomposition at 373 K: 867 seconds

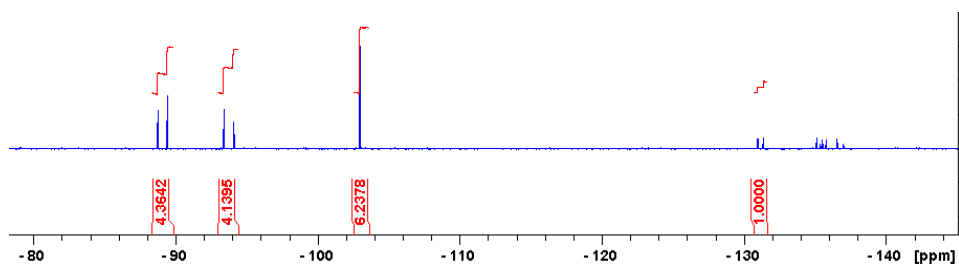



## Raw Kinetic Data for Piperonyl 22a

<sup>19</sup>F NMR integration data for the VCPR of **22a** in d8-toluene (0.13 M) heated at 343 K (AV400, QNP-z probe); 8 scans, D1= 1.5 s, TE = 343 K.

| Time<br>(s) | Average Integrations |      |      | Relative Percentage |      |      |
|-------------|----------------------|------|------|---------------------|------|------|
|             | SM                   | VCPR | 3,3  | SM                  | VCPR | 3,3  |
| 0           | 1.00                 | 0.03 | 0.01 | 96.4                | 3.1  | 0.5  |
| 360         | 1.00                 | 0.05 | 0.02 | 93.7                | 4.6  | 1.7  |
| 480         | 1.00                 | 0.07 | 0.04 | 90.0                | 6.3  | 3.7  |
| 720         | 1.00                 | 0.07 | 0.06 | 88.5                | 6.2  | 5.3  |
| 960         | 1.00                 | 0.11 | 0.09 | 83.5                | 9.1  | 7.5  |
| 1200        | 1.00                 | 0.11 | 0.09 | 83.0                | 9.3  | 7.7  |
| 1440        | 1.00                 | 0.14 | 0.15 | 77.2                | 10.9 | 11.9 |
| 1680        | 1.00                 | 0.16 | 0.17 | 74.9                | 12.2 | 12.8 |
| 1920        | 1.00                 | 0.19 | 0.20 | 71.8                | 14.0 | 14.2 |
| 2160        | 1.00                 | 0.22 | 0.22 | 69.5                | 15.0 | 15.6 |
| 2400        | 1.00                 | 0.25 | 0.27 | 66.0                | 16.4 | 17.5 |
| 2640        | 1.00                 | 0.28 | 0.30 | 63.2                | 17.7 | 19.1 |
| 2880        | 1.00                 | 0.28 | 0.31 | 63.0                | 17.5 | 19.5 |
| 3120        | 1.00                 | 0.32 | 0.36 | 59.6                | 19.0 | 21.4 |
| 3360        | 1.00                 | 0.34 | 0.36 | 58.7                | 20.1 | 21.2 |
| 3600        | 1.00                 | 0.40 | 0.44 | 54.4                | 21.6 | 24.0 |
| 3840        | 1.00                 | 0.38 | 0.45 | 54.4                | 20.9 | 24.7 |
| 4080        | 1.00                 | 0.46 | 0.52 | 50.7                | 23.1 | 26.2 |
| 4320        | 1.00                 | 0.45 | 0.51 | 50.9                | 22.9 | 26.2 |
| 4560        | 1.00                 | 0.50 | 0.55 | 48.8                | 24.2 | 27.0 |
| 4800        | 1.00                 | 0.57 | 0.68 | 44.5                | 25.2 | 30.3 |
| 5040        | 1.00                 | 0.60 | 0.70 | 43.5                | 26.1 | 30.4 |
| 5280        | 1.00                 | 0.62 | 0.72 | 42.8                | 26.4 | 30.7 |
| 5520        | 1.00                 | 0.62 | 0.77 | 41.9                | 26.1 | 32.1 |
| 5760        | 1.00                 | 0.69 | 0.79 | 40.2                | 27.9 | 31.9 |
| 6000        | 1.00                 | 0.76 | 0.83 | 38.5                | 29.5 | 32.0 |
| 6240        | 1.00                 | 0.78 | 0.95 | 36.6                | 28.5 | 34.8 |
| 6480        | 1.00                 | 0.82 | 0.99 | 35.7                | 29.1 | 35.2 |
| 6720        | 1.00                 | 0.88 | 1.02 | 34.5                | 30.5 | 35.0 |
| 6960        | 1.00                 | 0.90 | 1.08 | 33.6                | 30.3 | 36.1 |
| 7200        | 1.00                 | 0.99 | 1.15 | 31.8                | 31.7 | 36.5 |
| 7440        | 1.00                 | 1.02 | 1.23 | 30.8                | 31.3 | 37.9 |
| 7680        | 1.00                 | 1.09 | 1.32 | 29.3                | 32.0 | 38.8 |
| 7920        | 1.00                 | 1.15 | 1.38 | 28.4                | 32.6 | 39.0 |
| 8160        | 1.00                 | 1.22 | 1.51 | 26.8                | 32.6 | 40.6 |
| 8400        | 1.00                 | 1.26 | 1.45 | 27.0                | 34.0 | 39.1 |

| Time<br>(s) | Average Integrations |      |      | Relative Percentage |      |      |
|-------------|----------------------|------|------|---------------------|------|------|
|             | SM                   | VCPR | 3,3  | SM                  | VCPR | 3,3  |
| 8640        | 1.00                 | 1.27 | 1.56 | 26.1                | 33.2 | 40.6 |
| 8880        | 1.00                 | 1.44 | 1.77 | 23.8                | 34.2 | 42.0 |
| 9120        | 1.00                 | 1.54 | 1.84 | 22.8                | 35.2 | 42.0 |
| 9360        | 1.00                 | 1.50 | 1.83 | 23.1                | 34.6 | 42.3 |
| 9600        | 1.00                 | 1.66 | 1.96 | 21.6                | 35.9 | 42.5 |
| 9840        | 1.00                 | 1.77 | 2.12 | 20.4                | 36.2 | 43.3 |
| 10080       | 1.00                 | 1.81 | 2.20 | 19.9                | 36.1 | 43.9 |
| 10320       | 1.00                 | 1.83 | 2.10 | 20.3                | 37.1 | 42.6 |
| 10560       | 1.00                 | 1.89 | 2.37 | 19.0                | 36.0 | 45.0 |
| 10800       | 1.00                 | 1.93 | 2.43 | 18.6                | 36.0 | 45.4 |
| 11280       | 1.00                 | 2.09 | 2.60 | 17.6                | 36.7 | 45.7 |
| 63960       | 0.00                 | 0.97 | 1.26 | 0.0                 | 43.6 | 56.4 |

<sup>19</sup>F NMR integration data for the VCPR of **22a** in d8-toluene (0.13 M) heated at 353 K (AV400, QNP-z probe); 8 scans, D1= 1.0 s, TE = 353 K.

| Time<br>(s) | Average Integrations |       |       | Relative Percentage |      |      |
|-------------|----------------------|-------|-------|---------------------|------|------|
|             | SM                   | VCPR  | 3,3   | SM                  | VCPR | 3,3  |
| 0           | 1.00                 | 0.04  | 0.02  | 94.0                | 3.9  | 2.2  |
| 240         | 1.00                 | 0.06  | 0.05  | 90.1                | 5.8  | 4.1  |
| 420         | 1.00                 | 0.12  | 0.06  | 84.4                | 10.2 | 5.4  |
| 600         | 1.00                 | 0.18  | 0.18  | 73.8                | 13.1 | 13.2 |
| 780         | 1.00                 | 0.23  | 0.24  | 67.6                | 15.8 | 16.5 |
| 960         | 1.00                 | 0.27  | 0.31  | 63.2                | 17.1 | 19.7 |
| 1140        | 1.00                 | 0.33  | 0.38  | 58.3                | 19.5 | 22.1 |
| 1320        | 1.00                 | 0.43  | 0.49  | 52.1                | 22.3 | 25.6 |
| 1500        | 1.00                 | 0.47  | 0.57  | 49.1                | 22.9 | 28.1 |
| 1680        | 1.00                 | 0.55  | 0.65  | 45.6                | 25.0 | 29.4 |
| 1860        | 1.00                 | 0.59  | 0.75  | 42.7                | 25.3 | 32.0 |
| 2040        | 1.00                 | 0.73  | 0.89  | 38.2                | 27.9 | 33.8 |
| 2220        | 1.00                 | 0.81  | 1.03  | 35.2                | 28.4 | 36.4 |
| 2400        | 1.00                 | 0.94  | 1.15  | 32.3                | 30.5 | 37.2 |
| 2580        | 1.00                 | 1.00  | 1.32  | 30.1                | 30.2 | 39.7 |
| 2760        | 1.00                 | 1.20  | 1.55  | 26.7                | 32.1 | 41.3 |
| 2940        | 1.00                 | 1.21  | 1.55  | 26.6                | 32.2 | 41.2 |
| 3120        | 1.00                 | 1.40  | 1.78  | 23.9                | 33.5 | 42.6 |
| 3300        | 1.00                 | 1.48  | 1.91  | 22.8                | 33.7 | 43.6 |
| 3480        | 1.00                 | 1.71  | 2.24  | 20.2                | 34.6 | 45.2 |
| 3660        | 1.00                 | 2.01  | 2.64  | 17.7                | 35.6 | 46.7 |
| 3840        | 1.00                 | 2.03  | 2.59  | 17.8                | 36.1 | 46.1 |
| 4020        | 1.00                 | 2.27  | 2.91  | 16.2                | 36.7 | 47.1 |
| 4200        | 1.00                 | 2.85  | 3.80  | 13.1                | 37.3 | 49.6 |
| 4380        | 1.00                 | 2.75  | 3.64  | 13.5                | 37.2 | 49.3 |
| 4560        | 1.00                 | 3.23  | 4.31  | 11.7                | 37.8 | 50.5 |
| 4740        | 1.00                 | 3.32  | 4.34  | 11.5                | 38.3 | 50.2 |
| 4920        | 1.00                 | 4.35  | 5.59  | 9.1                 | 39.8 | 51.1 |
| 5100        | 1.00                 | 4.13  | 5.38  | 9.5                 | 39.3 | 51.2 |
| 5280        | 1.00                 | 4.26  | 5.65  | 9.2                 | 39.1 | 51.8 |
| 5460        | 1.00                 | 5.00  | 6.58  | 7.9                 | 39.8 | 52.3 |
| 5640        | 1.00                 | 4.81  | 6.06  | 8.4                 | 40.5 | 51.1 |
| 5820        | 1.00                 | 6.21  | 8.21  | 6.5                 | 40.3 | 53.2 |
| 6000        | 1.00                 | 6.75  | 8.85  | 6.0                 | 40.7 | 53.3 |
| 6180        | 1.00                 | 8.11  | 10.43 | 5.1                 | 41.5 | 53.4 |
| 6360        | 1.00                 | 5.79  | 7.55  | 7.0                 | 40.4 | 52.7 |
| 6540        | 1.00                 | 9.03  | 12.02 | 4.5                 | 41.0 | 54.5 |
| 6720        | 1.00                 | 9.71  | 12.64 | 4.3                 | 41.6 | 54.1 |
| 6900        | 1.00                 | 10.78 | 14.33 | 3.8                 | 41.3 | 54.9 |
| 7080        | 1.00                 | 9.40  | 12.23 | 4.4                 | 41.5 | 54.0 |
| 7260        | 1.00                 | 10.10 | 12.74 | 4.2                 | 42.4 | 53.4 |
| 7440        | 1.00                 | 12.65 | 16.46 | 3.3                 | 42.0 | 54.7 |
| 7620        | 1.00                 | 12.47 | 16.40 | 3.3                 | 41.7 | 54.9 |
| 15120       | 0.00                 | 1.01  | 1.61  | 0.0                 | 38.4 | 61.6 |

<sup>19</sup>F NMR integration data for the VCPR of **22a** in d8-toluene (0.13 M) heated at 363 K (AV400, QNP-z probe); 8 scans, D1= 1.0 s, TE = 363 K.

| Time | Average Integrations |      |      | Relative Percentage |      |      | Time | Average Integrations |       |       | Relative Percentage |      |      |
|------|----------------------|------|------|---------------------|------|------|------|----------------------|-------|-------|---------------------|------|------|
|      | (s)                  | SM   | VCPR | 3,3                 | SM   | VCPR |      | 3,3                  | (s)   | SM    | VCPR                | 3,3  | SM   |
| 0    | 1.00                 | 0.03 | 0.02 | 95.0                | 2.8  | 2.1  | 1295 | 1.00                 | 1.69  | 2.41  | 19.6                | 33.1 | 47.3 |
| 120  | 1.00                 | 0.11 | 0.10 | 82.8                | 8.8  | 8.4  | 1325 | 1.00                 | 1.87  | 2.51  | 18.6                | 34.8 | 46.6 |
| 160  | 1.00                 | 0.12 | 0.13 | 80.0                | 9.9  | 10.0 | 1355 | 1.00                 | 1.86  | 2.60  | 18.3                | 34.1 | 47.6 |
| 190  | 1.00                 | 0.15 | 0.15 | 77.2                | 11.4 | 11.4 | 1385 | 1.00                 | 1.95  | 2.65  | 17.9                | 34.8 | 47.3 |
| 210  | 1.00                 | 0.17 | 0.19 | 73.2                | 12.8 | 14.0 | 1415 | 1.00                 | 2.48  | 3.36  | 14.6                | 36.2 | 49.1 |
| 245  | 1.00                 | 0.18 | 0.22 | 71.4                | 13.1 | 15.5 | 1445 | 1.00                 | 2.31  | 3.18  | 15.4                | 35.6 | 49.0 |
| 275  | 1.00                 | 0.22 | 0.27 | 67.2                | 14.6 | 18.2 | 1475 | 1.00                 | 2.65  | 3.57  | 13.9                | 36.6 | 49.5 |
| 305  | 1.00                 | 0.23 | 0.30 | 65.7                | 14.9 | 19.4 | 1505 | 1.00                 | 2.31  | 3.08  | 15.6                | 36.1 | 48.2 |
| 335  | 1.00                 | 0.26 | 0.31 | 63.4                | 16.7 | 19.9 | 1535 | 1.00                 | 2.70  | 3.55  | 13.8                | 37.2 | 49.0 |
| 365  | 1.00                 | 0.30 | 0.34 | 61.0                | 18.1 | 20.9 | 1565 | 1.00                 | 2.65  | 3.68  | 13.6                | 36.2 | 50.2 |
| 395  | 1.00                 | 0.32 | 0.37 | 59.2                | 18.8 | 22.0 | 1595 | 1.00                 | 3.04  | 4.27  | 12.0                | 36.5 | 51.4 |
| 425  | 1.00                 | 0.36 | 0.43 | 55.9                | 20.1 | 24.1 | 1625 | 1.00                 | 3.07  | 4.41  | 11.8                | 36.2 | 52.0 |
| 455  | 1.00                 | 0.36 | 0.47 | 54.4                | 19.8 | 25.7 | 1655 | 1.00                 | 2.96  | 4.16  | 12.3                | 36.5 | 51.2 |
| 485  | 1.00                 | 0.43 | 0.51 | 51.8                | 22.1 | 26.2 | 1685 | 1.00                 | 3.04  | 4.26  | 12.1                | 36.6 | 51.3 |
| 515  | 1.00                 | 0.43 | 0.55 | 50.6                | 21.7 | 27.7 | 1715 | 1.00                 | 3.22  | 4.44  | 11.6                | 37.2 | 51.3 |
| 545  | 1.00                 | 0.44 | 0.55 | 50.3                | 21.9 | 27.8 | 1745 | 1.00                 | 4.05  | 5.63  | 9.4                 | 37.9 | 52.7 |
| 575  | 1.00                 | 0.48 | 0.63 | 47.3                | 22.8 | 29.8 | 1775 | 1.00                 | 3.50  | 4.64  | 10.9                | 38.3 | 50.8 |
| 605  | 1.00                 | 0.52 | 0.66 | 45.7                | 24.0 | 30.3 | 1805 | 1.00                 | 3.63  | 4.95  | 10.4                | 37.9 | 51.7 |
| 635  | 1.00                 | 0.54 | 0.71 | 44.5                | 23.9 | 31.6 | 1835 | 1.00                 | 4.26  | 5.99  | 8.9                 | 37.9 | 53.2 |
| 665  | 1.00                 | 0.59 | 0.80 | 42.0                | 24.6 | 33.4 | 1865 | 1.00                 | 4.10  | 5.49  | 9.4                 | 38.7 | 51.8 |
| 695  | 1.00                 | 0.64 | 0.83 | 40.5                | 25.9 | 33.6 | 1895 | 1.00                 | 4.71  | 6.66  | 8.1                 | 38.1 | 53.9 |
| 725  | 1.00                 | 0.69 | 0.85 | 39.3                | 27.1 | 33.6 | 1925 | 1.00                 | 5.27  | 7.43  | 7.3                 | 38.4 | 54.3 |
| 755  | 1.00                 | 0.70 | 0.92 | 38.2                | 26.8 | 35.0 | 1955 | 1.00                 | 4.75  | 6.31  | 8.3                 | 39.4 | 52.3 |
| 785  | 1.00                 | 0.73 | 0.98 | 36.9                | 26.8 | 36.3 | 1985 | 1.00                 | 5.47  | 7.64  | 7.1                 | 38.8 | 54.1 |
| 815  | 1.00                 | 0.77 | 1.06 | 35.3                | 27.1 | 37.5 | 2015 | 1.00                 | 4.68  | 6.58  | 8.2                 | 38.2 | 53.7 |
| 845  | 1.00                 | 0.86 | 1.13 | 33.5                | 28.8 | 37.7 | 2045 | 1.00                 | 4.82  | 6.57  | 8.1                 | 38.9 | 53.0 |
| 875  | 1.00                 | 0.86 | 1.15 | 33.2                | 28.6 | 38.2 | 2075 | 1.00                 | 6.13  | 8.45  | 6.4                 | 39.4 | 54.2 |
| 905  | 1.00                 | 0.93 | 1.23 | 31.7                | 29.4 | 39.0 | 2105 | 1.00                 | 5.63  | 7.83  | 6.9                 | 38.9 | 54.2 |
| 935  | 1.00                 | 0.96 | 1.28 | 30.8                | 29.8 | 39.4 | 2135 | 1.00                 | 5.74  | 8.28  | 6.7                 | 38.2 | 55.1 |
| 965  | 1.00                 | 1.02 | 1.35 | 29.7                | 30.3 | 40.0 | 2165 | 1.00                 | 6.95  | 9.38  | 5.8                 | 40.1 | 54.1 |
| 995  | 1.00                 | 1.09 | 1.47 | 28.0                | 30.7 | 41.3 | 2315 | 1.00                 | 12.12 | 16.74 | 3.3                 | 40.6 | 56.1 |
| 1025 | 1.00                 | 1.16 | 1.64 | 26.3                | 30.5 | 43.2 | 2465 | 1.00                 | 11.96 | 16.63 | 3.4                 | 40.4 | 56.2 |
| 1055 | 1.00                 | 1.18 | 1.65 | 26.1                | 30.8 | 43.1 | 2525 | 1.00                 | 10.33 | 14.72 | 3.8                 | 39.6 | 56.5 |
| 1085 | 1.00                 | 1.30 | 1.72 | 24.9                | 32.4 | 42.7 | 2585 | 1.00                 | 10.78 | 15.52 | 3.7                 | 39.5 | 56.9 |
| 1115 | 1.00                 | 1.27 | 1.75 | 24.9                | 31.6 | 43.5 | 2645 | 1.00                 | 14.73 | 21.04 | 2.7                 | 40.0 | 57.2 |
| 1145 | 1.00                 | 1.41 | 1.91 | 23.2                | 32.6 | 44.2 |      |                      |       |       |                     |      |      |
| 1175 | 1.00                 | 1.38 | 1.88 | 23.5                | 32.4 | 44.1 |      |                      |       |       |                     |      |      |
| 1205 | 1.00                 | 1.56 | 2.07 | 21.6                | 33.7 | 44.7 |      |                      |       |       |                     |      |      |
| 1235 | 1.00                 | 1.78 | 2.43 | 19.2                | 34.2 | 46.7 |      |                      |       |       |                     |      |      |
| 1265 | 1.00                 | 1.72 | 2.35 | 19.7                | 34.0 | 46.3 |      |                      |       |       |                     |      |      |
|      |                      |      |      |                     |      |      | 6360 | 1.00                 | 55.62 | 98.61 | 0.6                 | 35.8 | 63.5 |

<sup>19</sup>F NMR integration data for the VCPR of **22a** in d8-toluene (0.15 M) heated at 373 K (AV400, QNP-z probe); 8 scans, D1= 1.0 s, TE = 373 K.

| Time<br>(s) | Average Integrations |      |       | Relative Percentage |      |      | Time<br>(s) | Average Integrations |        |        | Relative Percentage |      |      |
|-------------|----------------------|------|-------|---------------------|------|------|-------------|----------------------|--------|--------|---------------------|------|------|
|             | SM                   | VCPR | 3,3   | SM                  | VCPR | 3,3  |             | SM                   | VCPR   | 3,3    | SM                  | VCPR | 3,3  |
| 51          | 1.00                 | 0.07 | 0.04  | 90.6                | 6.1  | 3.4  | 1011        | 1.00                 | 7.67   | 10.89  | 5.1                 | 39.2 | 55.7 |
| 75          | 1.00                 | 0.08 | 0.04  | 90.0                | 6.8  | 3.3  | 1035        | 1.00                 | 6.99   | 10.21  | 5.5                 | 38.4 | 56.1 |
| 99          | 1.00                 | 0.10 | 0.11  | 82.6                | 7.9  | 9.5  | 1059        | 1.00                 | 6.96   | 9.74   | 5.6                 | 39.3 | 55.0 |
| 123         | 1.00                 | 0.12 | 0.16  | 78.4                | 9.3  | 12.3 | 1083        | 1.00                 | 8.89   | 12.55  | 4.5                 | 39.6 | 55.9 |
| 147         | 1.00                 | 0.18 | 0.22  | 71.1                | 13.1 | 15.8 | 1107        | 1.00                 | 10.62  | 14.97  | 3.8                 | 39.9 | 56.3 |
| 171         | 1.00                 | 0.24 | 0.29  | 65.2                | 15.9 | 18.9 | 1131        | 1.00                 | 9.79   | 14.16  | 4.0                 | 39.2 | 56.8 |
| 195         | 1.00                 | 0.28 | 0.35  | 61.6                | 17.0 | 21.4 | 1155        | 1.00                 | 14.57  | 21.05  | 2.7                 | 39.8 | 57.5 |
| 219         | 1.00                 | 0.32 | 0.42  | 57.2                | 18.6 | 24.2 | 1179        | 1.00                 | 12.66  | 17.92  | 3.2                 | 40.1 | 56.7 |
| 243         | 1.00                 | 0.35 | 0.52  | 53.4                | 18.9 | 27.6 | 1203        | 1.00                 | 16.53  | 23.12  | 2.5                 | 40.7 | 56.9 |
| 267         | 1.00                 | 0.43 | 0.58  | 49.7                | 21.3 | 29.0 | 1227        | 1.00                 | 16.37  | 22.65  | 2.5                 | 40.9 | 56.6 |
| 291         | 1.00                 | 0.51 | 0.68  | 45.7                | 23.2 | 31.1 | 1251        | 1.00                 | 16.80  | 23.88  | 2.4                 | 40.3 | 57.3 |
| 315         | 1.00                 | 0.56 | 0.77  | 42.8                | 24.2 | 33.0 | 1275        | 1.00                 | 23.06  | 33.48  | 1.7                 | 40.1 | 58.2 |
| 339         | 1.00                 | 0.61 | 0.85  | 40.5                | 24.9 | 34.6 | 1299        | 1.00                 | 20.64  | 28.65  | 2.0                 | 41.0 | 57.0 |
| 363         | 1.00                 | 0.66 | 0.95  | 38.3                | 25.2 | 36.5 | 1323        | 1.00                 | 41.69  | 61.14  | 1.0                 | 40.2 | 58.9 |
| 387         | 1.00                 | 0.76 | 1.08  | 35.2                | 26.7 | 38.1 | 1347        | 1.00                 | 22.65  | 32.25  | 1.8                 | 40.5 | 57.7 |
| 411         | 1.00                 | 0.85 | 1.23  | 32.5                | 27.6 | 39.9 | 1371        | 1.00                 | 29.39  | 42.34  | 1.4                 | 40.4 | 58.2 |
| 435         | 1.00                 | 0.93 | 1.36  | 30.4                | 28.4 | 41.2 | 1395        | 1.00                 | 28.58  | 40.41  | 1.4                 | 40.8 | 57.7 |
| 459         | 1.00                 | 0.99 | 1.41  | 29.4                | 29.1 | 41.4 | 1419        | 1.00                 | 39.00  | 56.55  | 1.0                 | 40.4 | 58.6 |
| 483         | 1.00                 | 1.10 | 1.57  | 27.2                | 30.0 | 42.8 | 1443        | 1.00                 | 38.19  | 54.13  | 1.1                 | 40.9 | 58.0 |
| 507         | 1.00                 | 1.22 | 1.83  | 24.7                | 30.2 | 45.1 | 1467        | 1.00                 | 34.78  | 50.50  | 1.2                 | 40.3 | 58.5 |
| 531         | 1.00                 | 1.34 | 1.88  | 23.7                | 31.7 | 44.6 | 1635        | 1.00                 | 382.68 | 547.06 | 0.1                 | 41.1 | 58.8 |
| 555         | 1.00                 | 1.52 | 2.20  | 21.2                | 32.2 | 46.6 |             |                      |        |        |                     |      |      |
| 579         | 1.00                 | 1.59 | 2.34  | 20.3                | 32.3 | 47.5 |             |                      |        |        |                     |      |      |
| 603         | 1.00                 | 1.76 | 2.58  | 18.7                | 33.0 | 48.3 |             |                      |        |        |                     |      |      |
| 627         | 1.00                 | 1.97 | 2.92  | 17.0                | 33.4 | 49.6 |             |                      |        |        |                     |      |      |
| 651         | 1.00                 | 2.21 | 3.16  | 15.7                | 34.7 | 49.7 |             |                      |        |        |                     |      |      |
| 675         | 1.00                 | 2.13 | 3.13  | 16.0                | 34.0 | 50.0 |             |                      |        |        |                     |      |      |
| 699         | 1.00                 | 2.43 | 3.56  | 14.3                | 34.8 | 50.9 |             |                      |        |        |                     |      |      |
| 723         | 1.00                 | 2.70 | 3.87  | 13.2                | 35.6 | 51.2 |             |                      |        |        |                     |      |      |
| 747         | 1.00                 | 2.88 | 4.15  | 12.4                | 35.8 | 51.7 |             |                      |        |        |                     |      |      |
| 771         | 1.00                 | 2.98 | 4.32  | 12.0                | 35.9 | 52.1 |             |                      |        |        |                     |      |      |
| 795         | 1.00                 | 3.59 | 5.19  | 10.2                | 36.7 | 53.1 |             |                      |        |        |                     |      |      |
| 819         | 1.00                 | 3.78 | 5.38  | 9.8                 | 37.2 | 53.0 |             |                      |        |        |                     |      |      |
| 843         | 1.00                 | 3.36 | 4.88  | 10.8                | 36.3 | 52.8 |             |                      |        |        |                     |      |      |
| 867         | 1.00                 | 4.25 | 6.24  | 8.7                 | 37.0 | 54.3 |             |                      |        |        |                     |      |      |
| 891         | 1.00                 | 5.13 | 7.42  | 7.4                 | 37.9 | 54.7 |             |                      |        |        |                     |      |      |
| 915         | 1.00                 | 6.12 | 8.78  | 6.3                 | 38.5 | 55.2 |             |                      |        |        |                     |      |      |
| 939         | 1.00                 | 5.47 | 7.85  | 7.0                 | 38.2 | 54.8 |             |                      |        |        |                     |      |      |
| 963         | 1.00                 | 6.99 | 10.23 | 5.5                 | 38.4 | 56.2 |             |                      |        |        |                     |      |      |
| 987         | 1.00                 | 6.75 | 9.82  | 5.7                 | 38.4 | 55.9 |             |                      |        |        |                     |      |      |

## Rearrangement Reaction Profiles for 22a (343-373 K)

The reaction profile (relative percentage conversion vs time) was plotted using the NMR data above on Excel.

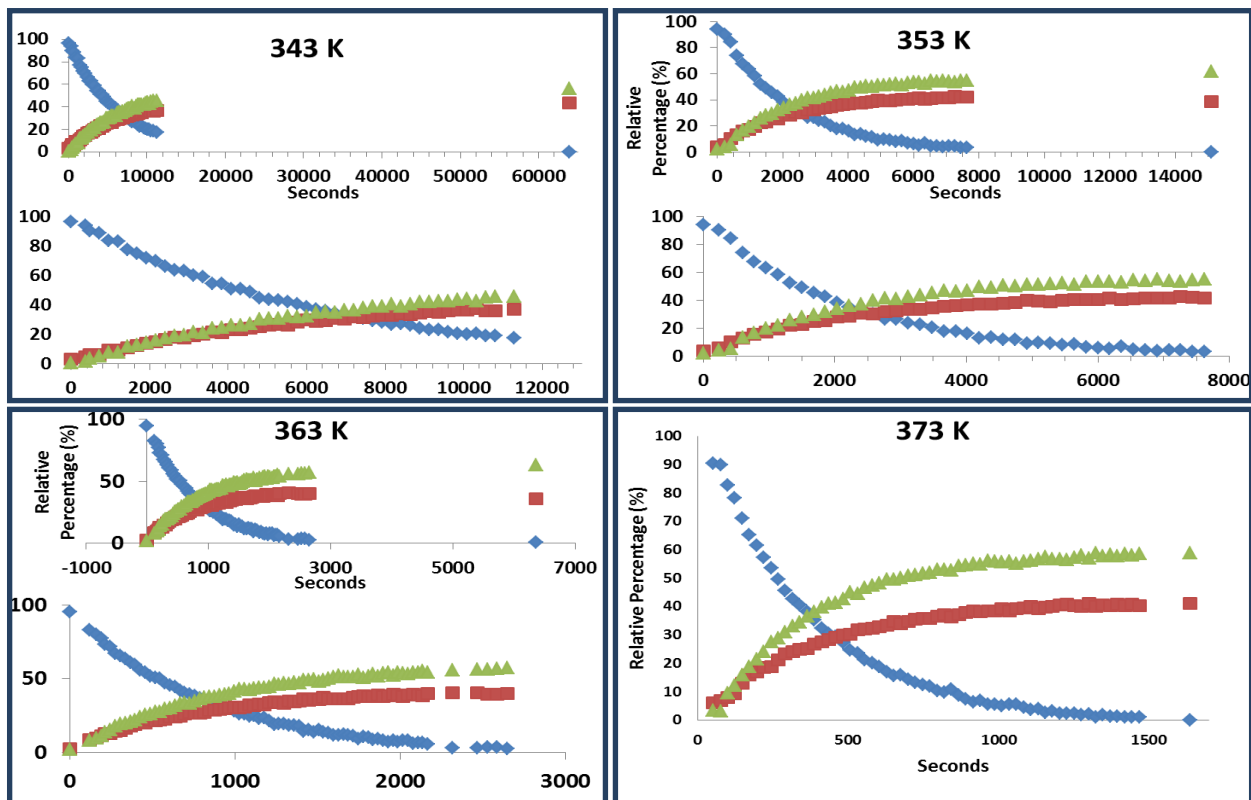

◆ Trans E   ■ VCPR   ▲ 3,3

Figure S35: Reaction profiles for the rearrangement of 22a at 343-373 K.

## NMR Simulations

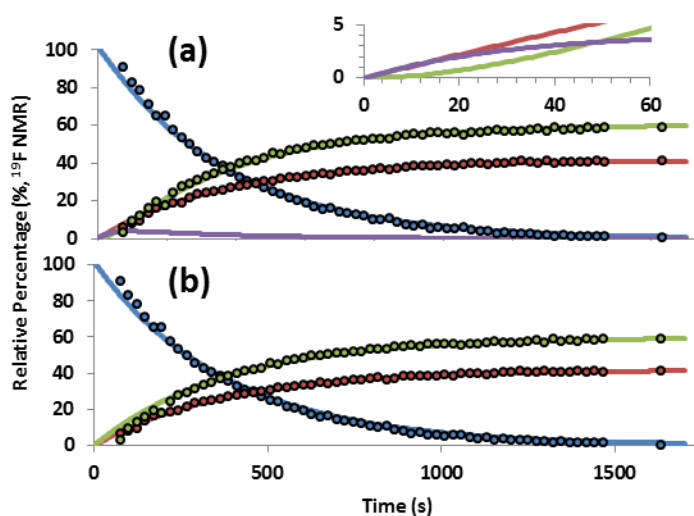

**Figure S36:** Experimental (points) and simulated (lines) concentration/time profile for thermolysis (373 K) of **22a**; a) simulation Model A takes into account *cis*-**48**; insert shows the first simulated 30 seconds of the rearrangement b) Model B utilising a steady state approximation for *cis*-**48** (blue = *trans*-**22a**, green = **44**, red = **39**, purple = *cis*-**48**).

The experimental concentration/time profile could be simulated successfully as far as experimental end points using numerical integration software<sup>S37</sup> based on two kinetic models expressed in **Scheme S7**.

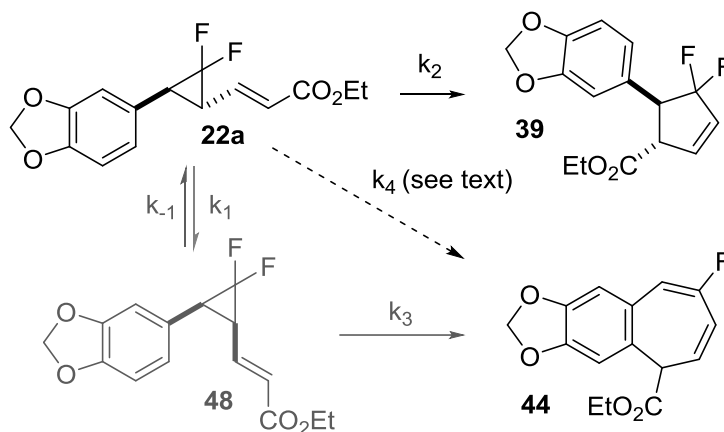

**Scheme S8:** Kinetic models used in the simulation of parallel VCPR and [3,3]-pathways.

Model A used successfully with phenyl **1a**, takes into account the equilibrium set up between *cis*-**48** and *trans*-**22a** due to cyclopropane stereoisomerisation and the subsequent first order rearrangement through to diene **44** and cyclopentene **39**, respectively. Simulated data using this model showed formation of *cis*-**48**, rising to a maximum at about 3% in the

reaction mixture after 30 seconds before slowly decaying (**Figure S36a**). These values are below the lower limit of experimental detection and explain why **48** was not observed. Deconvolution of rate constants predicted that rearrangement of **22a** should be selective for the [3,3]-pathway, with a rate approximately 40 times faster than VCPR (**Table S4**). This does not match experimental findings and may be due to an overestimation in rates involving *cis-XX* due to the lack of experimental data points to fit profiles to.

This issue was resolved by treating both rearrangement pathways as first order with respect to *trans-22a* (Model B),  $k_4$  represents an overall rate for the conversion of **22a** to **48** and incorporates the cyclopropane stereoisomerisation and [3,3]-rearrangement rates associated with **48**. Again, simulated data showed good correlation with experimental values (**Figure S36b**) and this time the rate constants favoured the [3,3] pathway only slightly (1.5 times faster than VCPR), consistent with experimental conversions of 59% and 41% to diene **44** and cyclopentene **39**, respectively. Furthermore, the much higher rate for VCPR from **22a** ( $11.5 \times 10^{-4} \text{ s}^{-1}$ ) than from phenyl **1a** ( $1.6 \times 10^{-4} \text{ s}^{-1}$ ), matched the predicted differences in calculated activation energies.

**Table S4:** Rate Constants extracted from reaction simulations.

| Rate<br>( $10^{-4} \text{ s}^{-1}$ ) | Model |      |
|--------------------------------------|-------|------|
|                                      | A     | B    |
| $k_2$                                | 11.2  | 11.1 |
| $K_1$                                | 21.8  | -    |
| $k_{-1}$                             | 153.2 | -    |
| $k_3$                                | 439.4 | -    |
| $k_4$                                | -     | 15.8 |
| $k_3/k_2$                            | 39.2  | -    |
| $k_4/k_2$                            | -     | 1.4  |

**Simulation Procedure:** The NMR concentration/time data obtained for **22a** (including a measured endpoint) was imported into Berkeley Madonna software<sup>S37</sup> from text files and simulated using the two methods discussed below:

**Model A**

```

STARTTIME = 0
STOPTIME=43200
DT = 0.05

A0=100 {start concentration of trans cyclopropane}
Init A=A0
B0=0 {start concentration of cis cyclopropane}
Init B=B0
C0=0 {start concentration of cyclopentene}
Init C=C0
D0=0 {start concentration of benzoheptadiene}
Init D=D0

k1=0.0001 {k1 is isomerisation to cis}
k_1=0.0001 {k_1 is isomerisation to trans}
k2=0.0001 {k2 is the VCPR}
k3=0.0001 {k3 is the 3,3}

d/dt (A)=-k1*A-k2*A+k_1*B
d/dt (B)=-k_1*B-k3*B+k1*A
d/dt (C)=k2*A
d/dt (D)=k3*B

LIMIT A>=0
LIMIT B>=0
LIMIT C>=0
LIMIT D>=0

```

The extracted rate data (343-373 K) from Model A was not consistent with experimental observation of VCPR and [3,3] pathways having similar rates (**Table S5**).

**Table S5:** Rate data based on Model A.

| Temp (K) | $k_1(10^{-4} s^{-1})$ | $k_{-1}(10^{-4} s^{-1})$ | $k_2(10^{-4} s^{-1})$ | $k_3(10^{-4} s^{-1})$ |
|----------|-----------------------|--------------------------|-----------------------|-----------------------|
| 343      | 5.243                 | 440.186                  | 0.734                 | 88.296                |
| 353      | 2.667                 | 0.193                    | 2.028                 | 114.035               |
| 363      | 11.061                | 165.75                   | 5.466                 | 357.913               |
| 373      | 21.794                | 153.183                  | 11.246                | 439.420               |



## Model B

STARTTIME = 0  
STOPTIME=43200  
DT = 0.05

A0=100 {start concentration of trans cyclopropane}  
Init A=A0  
C0=0 {start concentration of cyclopentene}  
Init C=C0  
D0=0 {start concentration of benzoheptadiene}  
Init D=D0

k2=0.0001 {k2 is the VCPR}  
k4=0.0001 {k3 is the 3,3}

d/dt (A)=- k2\*A-k4\*A  
d/dt (C)=k2\*A  
d/dt (D)=k4\*A

LIMIT A>=0  
LIMIT C>=0  
LIMIT D>=0

The rate data extracted from **Model B** matched experimental results more closely, giving similar rate values for VCPR and [3,3]-rearrangement pathways (**Table S6**).

**Table S6:** Rate data extracted from Model B.

| Temp (K) | k <sub>2</sub> (10 <sup>-4</sup> s <sup>-1</sup> ) | k <sub>4</sub> (10 <sup>-4</sup> s <sup>-1</sup> ) |
|----------|----------------------------------------------------|----------------------------------------------------|
| 343      | 0.7338                                             | 0.8725                                             |
| 353      | 2.0242                                             | 2.6320                                             |
| 363      | 5.4558                                             | 7.4840                                             |
| 373      | 11.0977                                            | 15.7878                                            |

## Arrhenius Plot for Piperonyl 22a

Rate data from **Table S4** was changed into the desired Arrhenius parameters (**Table S7**).

**Table S7:** Arrhenius Data

| Temperature (K) | 1/T         | $k_2 (10^{-4} \text{ s}^{-1})$ | $\text{Ln } k_2$ | $k_4 (10^{-4} \text{ s}^{-1})$ | $\text{Ln } k_4$ |
|-----------------|-------------|--------------------------------|------------------|--------------------------------|------------------|
| 344.1           | 0.002906132 | 0.7338                         | -9.51986         | 0.8725                         | -9.34673         |
| 354.2           | 0.002823264 | 2.0242                         | -8.50517         | 2.632                          | -8.2426          |
| 364.2           | 0.002745744 | 5.4558                         | -7.51366         | 7.484                          | -7.19757         |
| 374.2           | 0.002672368 | 11.0977                        | -6.8036          | 15.7878                        | -6.4511          |

From Arrhenius equation **1**, a plot of  $\text{Ln } k_2$  or  $\text{Ln } k_4$  vs  $1/T$  was generated on Excel and a line fitted using the trendline function (**Figure S37**). The equation of the line was calculated using the *LINEST* statistical function and the gradient used to calculate  $E_a$ . The errors in the values were estimated by plotting two lines which would result from the maximum errors ( $\pm 5\%$ ) in the outermost points and averaging the gradient to determine the  $E_a$ .

$$\ln k = \frac{-E_a}{R} \frac{1}{T} + \ln A \quad (1)$$

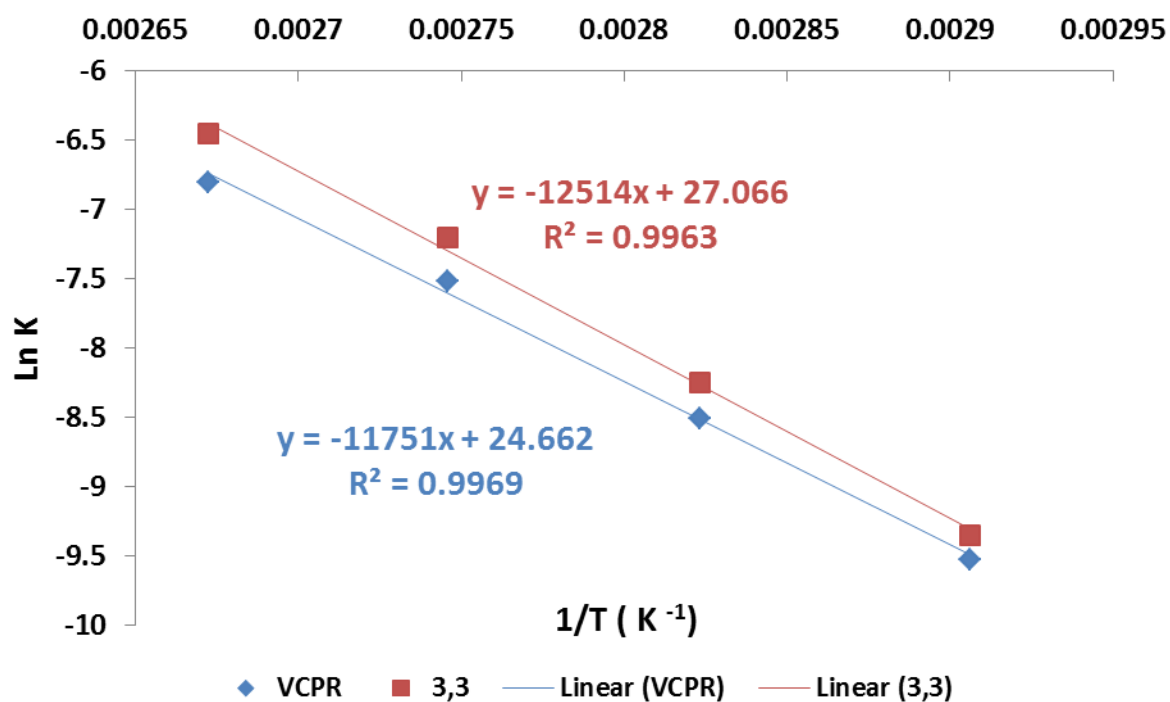

Figure S37: Combined Arrhenius Plots for VCPR and [3,3]-rearrangement of **22a**.

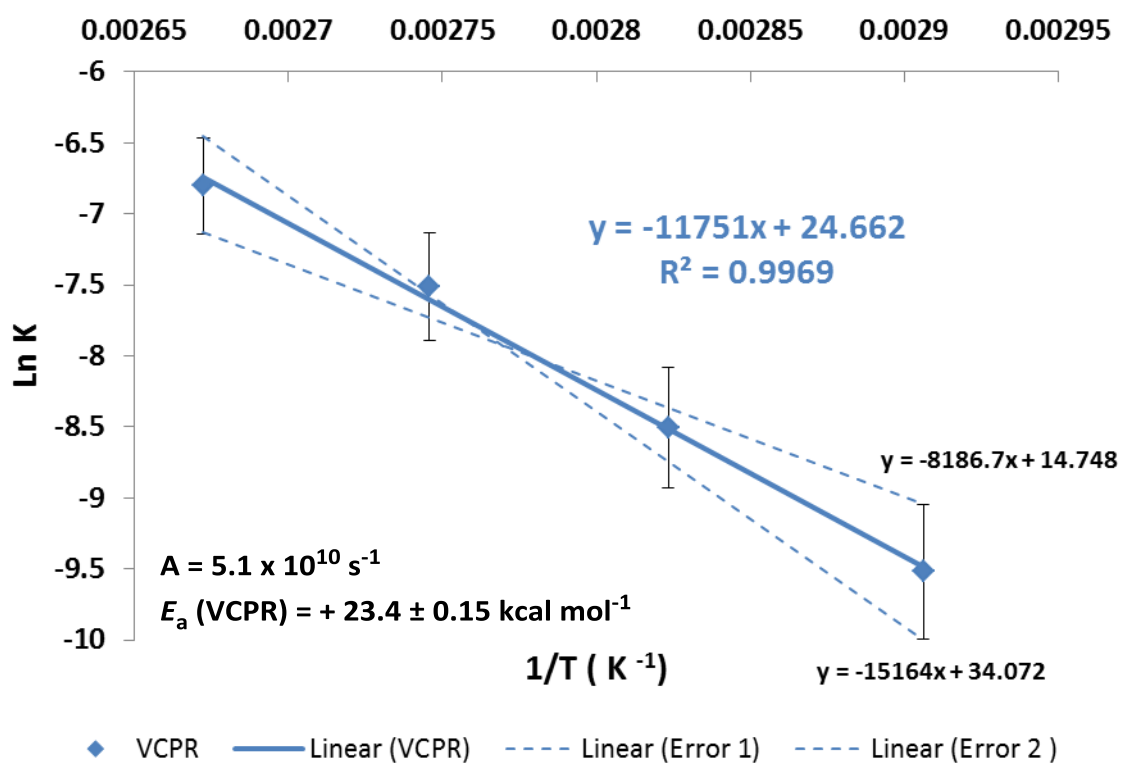

Figure S38: Arrhenius plot for VCPR of **22a** with error estimations.

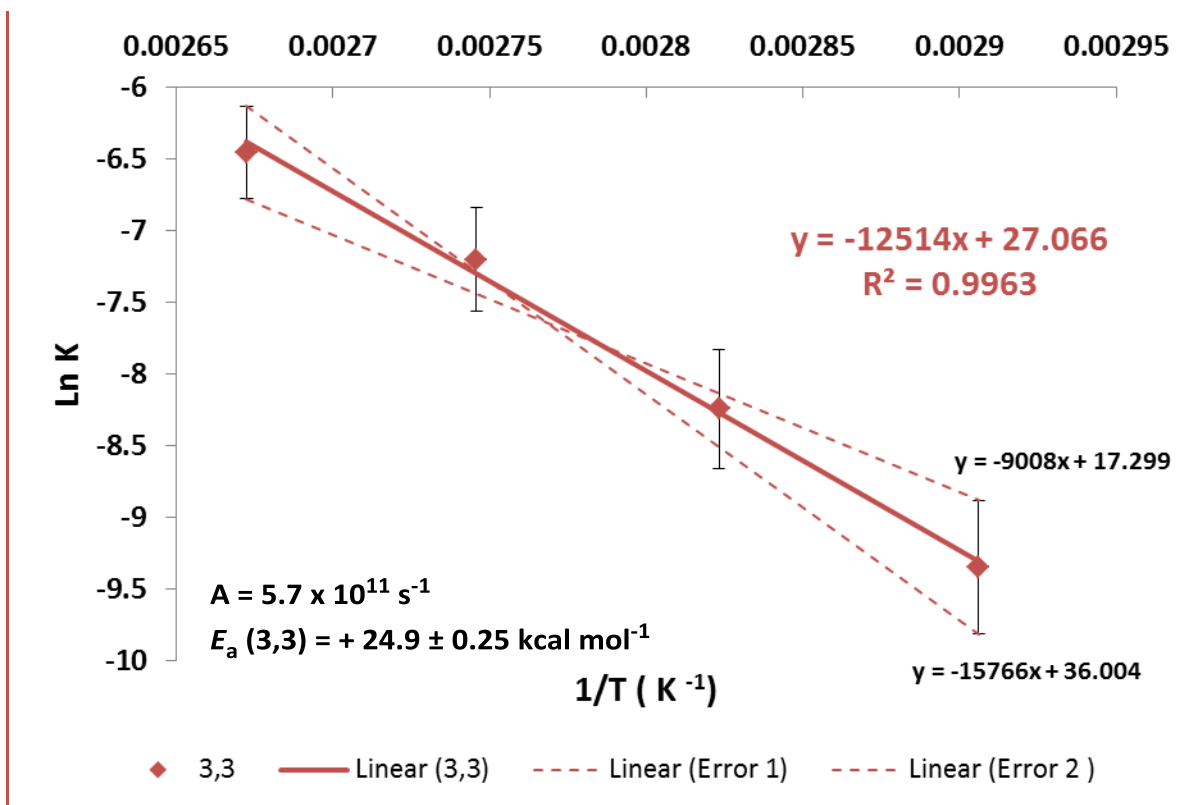

Figure S39: Arrhenius plot for [3,3]-rearrangement of **22a** with error estimations.

## Identification the Most Appropriate Method for Electronic Structure Calculations

In order to assess the accuracy of the electronic structure calculations efficiently, all experimental activation energies were recalculated to 298 K using the Arrhenius data and methods described by Maskill.<sup>S38</sup> We previously reported that for VCPRs, changes to the basis set either had detrimental effects (with UB3LYP, UM06-2X and UB97-D functionals) or gave slightly more accurate values of  $\Delta G^\ddagger$  when the diffuse function was introduced (6-31+G\*) with the UM05-2X functional. Increasing polarisation and diffuse functions (6-31+G\*\*) gave no improvement in the agreement between experimental and calculated values for a benchmarking set of VCPRs; these trends were also followed for piperonyl **22a** (see S182 for more details). Initial methodology screening was carried out using Spartan'10 software due to the ease of local implementation. All activation energies were then recalculated in Gaussian'09, since the software dealt with the open shell singlet character of the VCPR better giving  $\langle S^2 \rangle$  values closer to 0.75, some additional valuable methods were available, and the energies obtained would then be more comparable with the literature. Investigating the barrier height for the rearrangement of VCP **9f** to **TS1f** (models representing piperonyl **22a**), gave results comparable to those observed with phenyl **9j**. The M05-2X functional<sup>S39</sup> with the 6-31+G\* basis set still proved to be the most accurate methodology, with a  $\Delta\Delta G^\ddagger = 0.2 \text{ kcal mol}^{-1}$  (**Figure S40**). Truhlar and co-workers reported that the M06-2X functional, with a similar HF-exchange (56% for M05-2X and 58% M06-2X), was slightly more accurate overall in assessing kinetic parameters than M05-2X.<sup>S40</sup> However in our new system (VCP-**9f**) this was not the case, with a higher (4.5 kcal mol<sup>-1</sup>) overestimation by the M06-2X functional with the same basis set.

During the review of the manuscript of our previous publication, it was suggested that the different amounts of HF-exchange used in each method could have some role in determining the accuracy of the calculated free energies of activation for the VCPR. The M06 functional, with a lower HF-exchange of 27%, gave the closest agreement with experimental values when the 6-31G\* basis set was used ( $\Delta\Delta G^\ddagger = 0.7 \text{ kcal mol}^{-1}$ ). Electronic structure calculations using M05/6-31G\* methodology were less accurate ( $\Delta\Delta G^\ddagger = 2.6 \text{ kcal mol}^{-1}$ ), even though this functional has a similar HF-exchange value (28%) to the M06 functional. However, we observed little difference between the M05-2X and M06 functionals when the VCPR barrier heights were calculated with Gaussian'09 for piperonyl **9f**, simple precursor **8a** and phenyl **9j**. Furthermore, for the VCPR of non-fluoro **8b**, M06/6-

31+G\* calculations were only within 1.6 kcal mol<sup>-1</sup> (underestimate) whereas M05-2X/6-31+G\* methods gave  $\Delta\Delta G^\ddagger$  values within 0.8 kcal mol<sup>-1</sup> (overestimate, see S183 for more details).

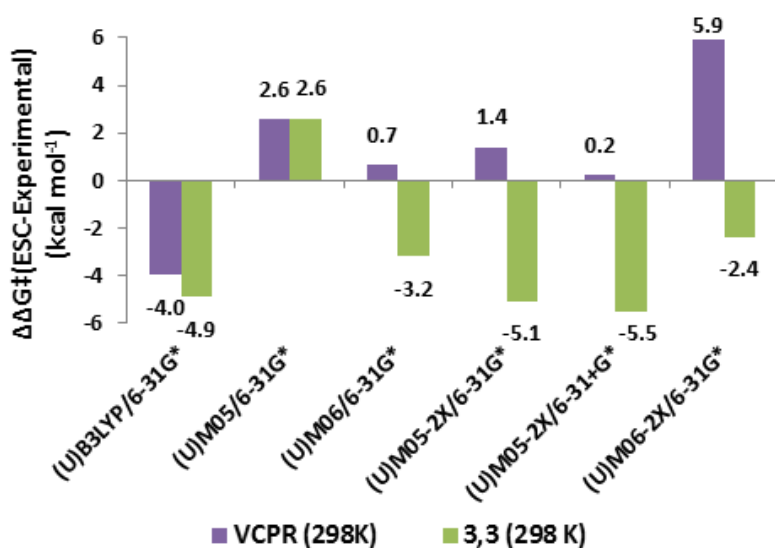

**Figure S40:** Differences between experimental  $\Delta G^\ddagger$  (298 K, re-calculated from activation parameters) and  $\Delta G^\ddagger$  from electronic structure calculations (298 K, gas phase, Spartan'10) plotted as  $\Delta\Delta G^\ddagger$  ( $\Delta G^\ddagger(\text{ESC}) - \Delta G^\ddagger(\text{experimental})$ , kcal mol<sup>-1</sup>) for the VCPR and [3,3]-rearrangement of VCP **9f** and **48**, respectively. Expected error associated with calculated data is  $\pm 0.5$  kcal mol<sup>-1</sup>.

Other DFT methods either underestimated experimental barrier heights when 20% HF-exchange was used (B3LYP), or overestimated (+1.8 kcal mol<sup>-1</sup>) when a hybrid exchange-correlation was used with 19% HF-exchange at short range and 65% at long range (CAM-B3LYP,<sup>541</sup> (**Figure S41**)). These results suggest that HF-exchange alone does not determine the accuracy of VCPR activation energies.

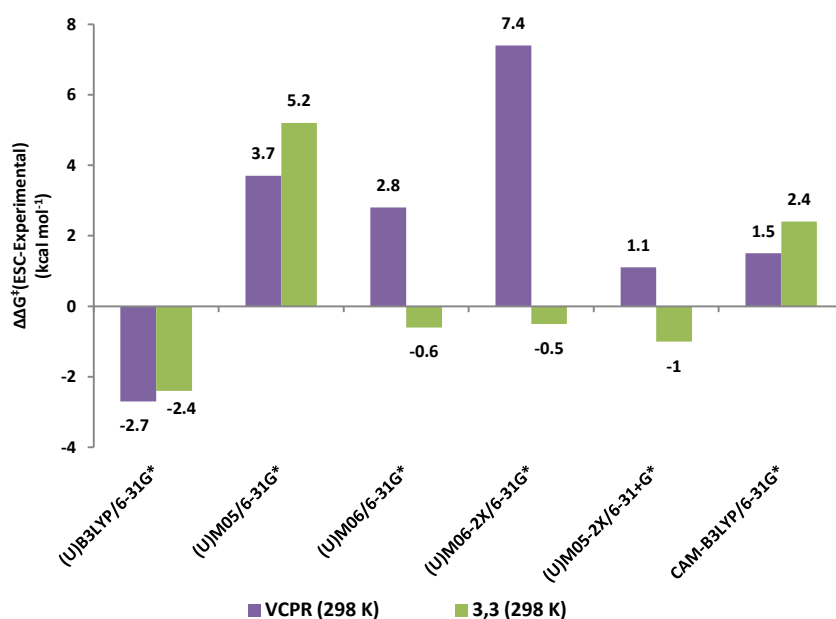

**Figure S41:** Differences between experimental  $\Delta G^\ddagger$  (298 K, re-calculated from activation parameters) and  $\Delta G^\ddagger$  from electronic structure calculations (298 K, gas phase, Gaussian'09) plotted as  $\Delta\Delta G^\ddagger$  ( $\Delta G^\ddagger(\text{ESC}) - \Delta G^\ddagger(\text{experimental})$ , kcal mol<sup>-1</sup>) for the VCPR and [3,3]-rearrangement of VCP **9f** and **48**, respectively. Expected error associated with calculated data is  $\pm 0.5$  kcal mol<sup>-1</sup>.

One difference which was observed between phenyl and piperonyl substituents was the change in dipole moment calculated from precursor to transition state; **9j** showed a slight decrease in calculated polarity during VCPR and [3,3]-rearrangement (change in dipole = -0.39 and -0.22 Debyes, respectively) whereas **9f** showed a slight increase (change in dipole = +1.2 and +0.95 Debyes, respectively, UB3LYP/6-31G\*, Gaussian'09, gas phase, 298 K). The calculated activation energies for the two rearrangement pathways from **9f** were assessed using M05-2X/6-31+G\* method with different solvation parameters which had varying dielectric constants (range of  $\epsilon = 2.37$ -35.7), but only a slight decrease in barrier height for the [3,3]-rearrangement in acetonitrile compared with gas phase was predicted ( $\Delta G^\ddagger_{\text{Gas}} - \Delta G^\ddagger_{\text{MeCN}} = -0.9$  kcal mol<sup>-1</sup>). Maas reported that the experimental rate for the [3,3]-rearrangement of non-fluorinated 1-aryl-2-vinylcyclopropanes was more than 8 times faster in acetonitrile than benzene, but VCPR rates were not affected by reaction solvent.<sup>S42</sup> VCP **22a** showed no significant change in rearrangement outcome when heated in either [D3]acetonitrile (52% (**44**([3,3]) and 48% (**39**(VCPR)) conversion, determined by <sup>19</sup>F NMR) or [D8]toluene (58% (**44**([3,3]) and 42% (**39**(VCPR)) conversion, determined by <sup>19</sup>F NMR).

Therefore, no solvation methods were applied and all electronic structure calculations were carried out in the gas phase (see S184 for more details).

Previously, only a concerted closed-shell transition state was investigated for the [3,3]-rearrangement of *cis*-**1b**. This was consistent with Özkan and Zora's study<sup>S43</sup> of the divinylcyclopropane rearrangement; despite running spin-unrestricted calculations, no low energy diradical or triplet intermediates or transition states were found. We used our previously optimised triplet intermediate of ring opened phenyl VCP **9j** as a starting point to search for alternative triplet or open shell singlet pathways for the [3,3]-rearrangement ((U)B3LYP/6-31G\* (gas phase, 298 K), Spartan'10). Two triplet transition states connected the alkenoate radical with alternative *ortho*-carbon centred radicals on the aromatic ring; both had uncompetitive calculated activation energies of 53.6 kcal mol<sup>-1</sup> and 59.2 kcal mol<sup>-1</sup>. Only one of these optimised as a diradical, but had a much higher barrier for rearrangement (37.8 kcal mol<sup>-1</sup>) than the closed shell pathway (27.8 kcal mol<sup>-1</sup>). For subsequent computational methodology screening, the [3,3]-rearrangement was treated using closed shell methodology (see S187 for more details).

Irrespective of the basis set used, the M05-2X functional was found to be the least accurate of those examined for calculating the free energy of activation of **48** to **TS6a** (6-31G\*,  $\Delta\Delta G^\ddagger = -5.1$  kcal mol<sup>-1</sup> and 6-31+G\*,  $\Delta\Delta G^\ddagger = -5.5$  kcal mol<sup>-1</sup>). Instead, the M06-2X/6-31G\* combination was found to be the best at predicting barrier height with a  $\Delta\Delta G^\ddagger = -2.4$  kcal mol<sup>-1</sup> (**Figure S40**). This is opposite to what was observed for the VCPR and gives a strong indication of the functionals' differing abilities in dealing with open shell singlet character or the loss of aromaticity at transition states. The (U)B3LYP/6-31G\* method gave a similar underestimation in barrier height for both pathways ( $\Delta\Delta G^\ddagger$  values were within error of  $\pm 0.9$  kcal mol<sup>-1</sup>) but (U)M05/6-31G\* gave exactly the same overestimate of 2.6 kcal mol<sup>-1</sup>. If required, these two combinations of functions and basis sets provide a universal method for assessing both rearrangement pathways in Spartan'10.

Electronic structure calculations for VCP **9f** which were carried out in Gaussian'09 dealt with the open shell singlet character of the VCPR better (*S*<sup>2</sup> value closer to 0.75) than Spartan'10, resulting in more accurate barrier heights; M05/6-31G\* was the key exception, with higher  $\Delta\Delta G^\ddagger$  values for both VCPR and [3,3]-pathways (+3.7 kcal mol<sup>-1</sup> and +5.2 kcal mol<sup>-1</sup>, respectively). DFT methodology using B3LYP/6-31G\* still gave consistent underestimation in barrier height for both pathways;  $\Delta\Delta G^\ddagger$  values were within 0.3 kcal mol<sup>-1</sup> of each other



(**Figure S41**). Of the Minnesota functionals, the M06-2X/6-31G\* method remained the most accurate for the [3,3]-rearrangement ( $\Delta\Delta G^\ddagger = -0.5 \text{ kcal mol}^{-1}$ ) and M05-2X/6-31+G\* for the VCPR ( $\Delta\Delta G^\ddagger = +1.1 \text{ kcal mol}^{-1}$ ).

We looked to explore the effectiveness of the B3LYP/6-31G\* and M06-2X/6-31G\* calculations of barrier heights for divinylcyclopropane<sup>S11,S44</sup> and heteroarene-vinylcyclopropane rearrangements<sup>S45</sup> reported in the literature but the reported experimental errors were so big that it made it impossible to distinguish between accurate and inaccurate calculated barriers (see S189 for more details).

An absolutely critical event in the [3,3]-rearrangement is the temporary disruption of aromaticity; the enthalpic consequences of this event must be handled well if any method is to provide realistic free energies of activation. The isodesmic reactions represented in **Scheme S9** were used to assess how well the B3LYP and M06-2X methods dealt with this temporary dearomatisation in the transition state.

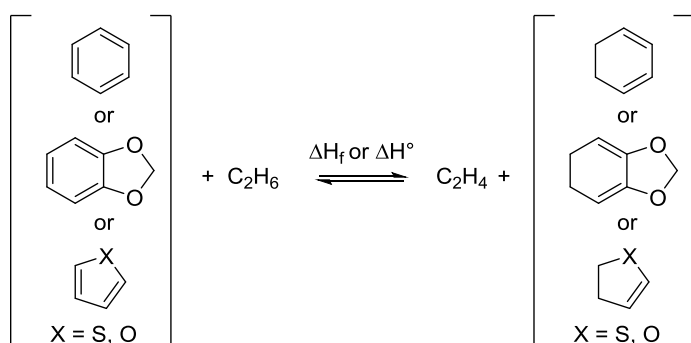

**Scheme S9:** Isodesmic reactions used to model the disruption of aromaticity.

We therefore benchmarked the DFT calculations against well-known thermochemical recipes using these isodesmic reactions. There was little difference between the calculated heats of formation for either T1<sup>S46</sup> or G3(MP2)<sup>S47</sup> thermochemical recipes (within computational error of  $\pm 0.5 \text{ kcal mol}^{-1}$ ), but when compared with experimental values,<sup>S48,S49</sup> T1 was more accurate for ethane and ethylene whereas G3(MP2) was slightly more accurate for aromatic compounds (**Figure S42**).

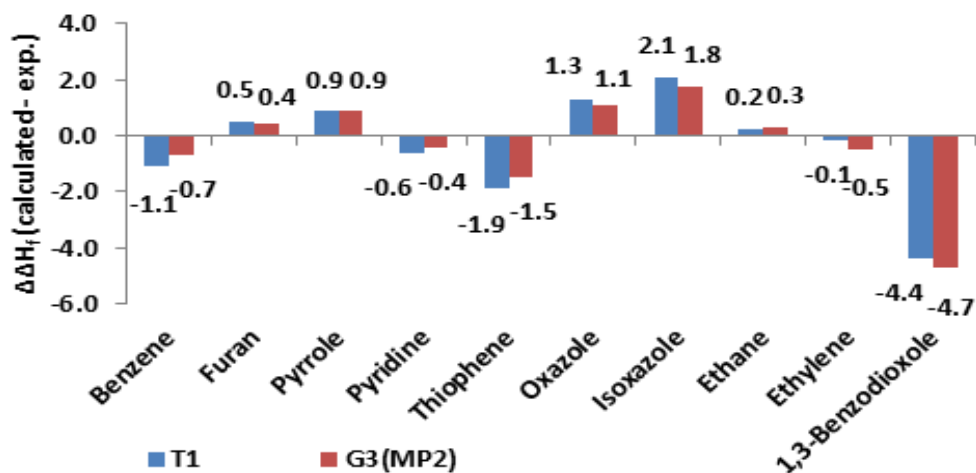

**Figure S40:** Differences between calculated and experimental heats of formation (Spartan'10, values in kcal mol<sup>-1</sup>).

The average error associated with the calculated heats of formation for benzene, furan, pyrrole, pyridine, thiophene, oxazole and isoxazole were  $\pm 1.21$  kcal mol<sup>-1</sup> and  $\pm 0.95$  kcal mol<sup>-1</sup> for T1 and G3(MP2), respectively. Calculated data for 1,3-benzodioxole had an underestimation greater than 4.0 kcal mol<sup>-1</sup> for both methods when compared with experimental values.<sup>S50</sup>

The G3(MP2) values were used to assess the accuracy of the calculated enthalpy change for the dearomatisation of benzene, benzodioxole, furan and thiophene using either B3LYP/6-31G\* or M06-2X/6-31G\* methodology (**Figure S43**, see S193, S194 for more details). The B3LYP method had an average overprediction in enthalpy of 5.3 kcal mol<sup>-1</sup> for benzene, furan, thiophene and 1,3-benzodioxole, and M06-2X consistently over-estimated the enthalpic cost of dearomatisation, ranging from 3.6 kcal mol<sup>-1</sup> to 6.4 kcal mol<sup>-1</sup> (total average error of 4.8 kcal mol<sup>-1</sup>).

This thermochemical analysis suggests that the two most desirable methods for assessing the [3,3]-rearrangement do not deal with the loss of aromaticity at the transition state well. This is important since M06-2X/6-31G\* calculations were perceived to be the most accurate, but are likely to over-predict the free energy ( $\Delta G^\ddagger$ ) for rearrangements involving benzene, furan, thiophene and 1,3-benzodioxole.

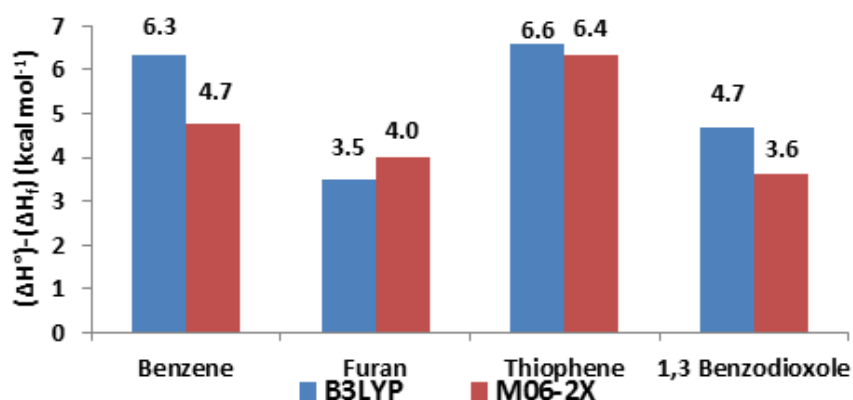

**Figure S43:** Difference in change in enthalpy ( $\Delta H^\circ$ ) calculated using B3LYP or M06-2X (6-31G\*) methods and G3(MP2) heats of formation ( $\Delta H_f$ ) for the isodesmic reactions represented in Scheme 10 (gas phase, 298 K, Spartan'10, units are in kcal mol<sup>-1</sup>).

### Basis Set Effect on 9f VCPR Activation Energies

M05-2X functional was the most accurate method for calculating the free energies of activation for the VCPR of phenyl-**9j** and piperonyl-**9f**. No benefit was found from increased basis sets higher than 6-31+G\* for **9f** consistent with our previous studies<sup>S20</sup> (Table S8 and Figure S44).

**Table S8:** Basis Set Effect on Accuracy of Calculated VCPR Free Energies of Activation for **9f**

| Functional | Basis Set | $\Delta G^\ddagger$ [a] | $\Delta\Delta G^\ddagger$ [b] |
|------------|-----------|-------------------------|-------------------------------|
| M05-2X     | 6-31G*    | 29.80                   | 2.80                          |
| M05-2X     | 6-31+G*   | 28.10                   | 1.10                          |
| M05-2X     | 6-311G*   | 30.30                   | 3.30                          |
| M05-2X     | 6-311+G** | 28.30                   | 1.30                          |

[a] Gaussian'09, gas phase, 298 K. [b] Difference in calculated free energy of activation  $\Delta G^\ddagger$  and calculated activation energy ( $E_a$ );  $\Delta\Delta G^\ddagger = (\Delta G) - (E_a)$ . All units are in kcal mol<sup>-1</sup>.

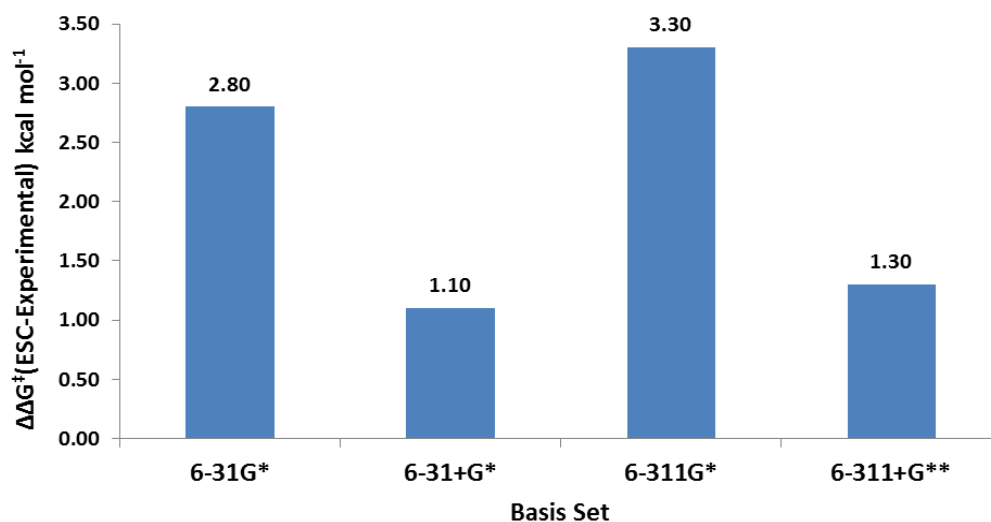

**Figure S41:** Comparison of  $\Delta\Delta G^\ddagger$  values and basis set effects (Gaussian'09, M05-2X, gas phase, 298 K, Energies quoted in kcal mol<sup>-1</sup>).

### Method Screening for VCPR

The calculated activation energies for the VCPR of simple VCP **8b** and difluoro-VCPs, phenyl **9j** and piperonyl **9f**, were assessed showing that the M05-2X/6-31+G\* method was the most accurate for all three compounds (**Table S9** and **Figure S45**).

**Table S9:** Methodology Screening for VCPR

| Method            | $\Delta\Delta G^\ddagger$ (ESC – Exerimental, kcal mol <sup>-1</sup> ) <sup>[a]</sup> |                          |                          |
|-------------------|---------------------------------------------------------------------------------------|--------------------------|--------------------------|
|                   | <b>8b</b> <sup>[b]</sup>                                                              | <b>9j</b> <sup>[c]</sup> | <b>9f</b> <sup>[d]</sup> |
| UB3LYP/6-31G*     | -2.3                                                                                  | -2                       | -2.7                     |
| UCAM-B3LYP/6-31G* | -                                                                                     | -                        | 1.5                      |
| UM05/6-31G*       | 2.0                                                                                   | 3.3                      | 3.7                      |
| UM06/6-31G*       | 1.4                                                                                   | 2.4                      | 2.8                      |
| UM05-2X/6-31G*    | 1.6                                                                                   | 2.5                      | 2.8                      |
| UM05-2X/6-31+G*   | 0.8                                                                                   | 1.2                      | 1.1                      |
| UM06/6-31+G*      | -1.6                                                                                  | -                        | -                        |

[a] Gaussian'09, gas phase, 298 K. [b] Experimental activation energy corrected to 298 K from literature data.<sup>S51</sup> [c] Experimental data reported in previous publication.<sup>S20</sup> [d] This work.

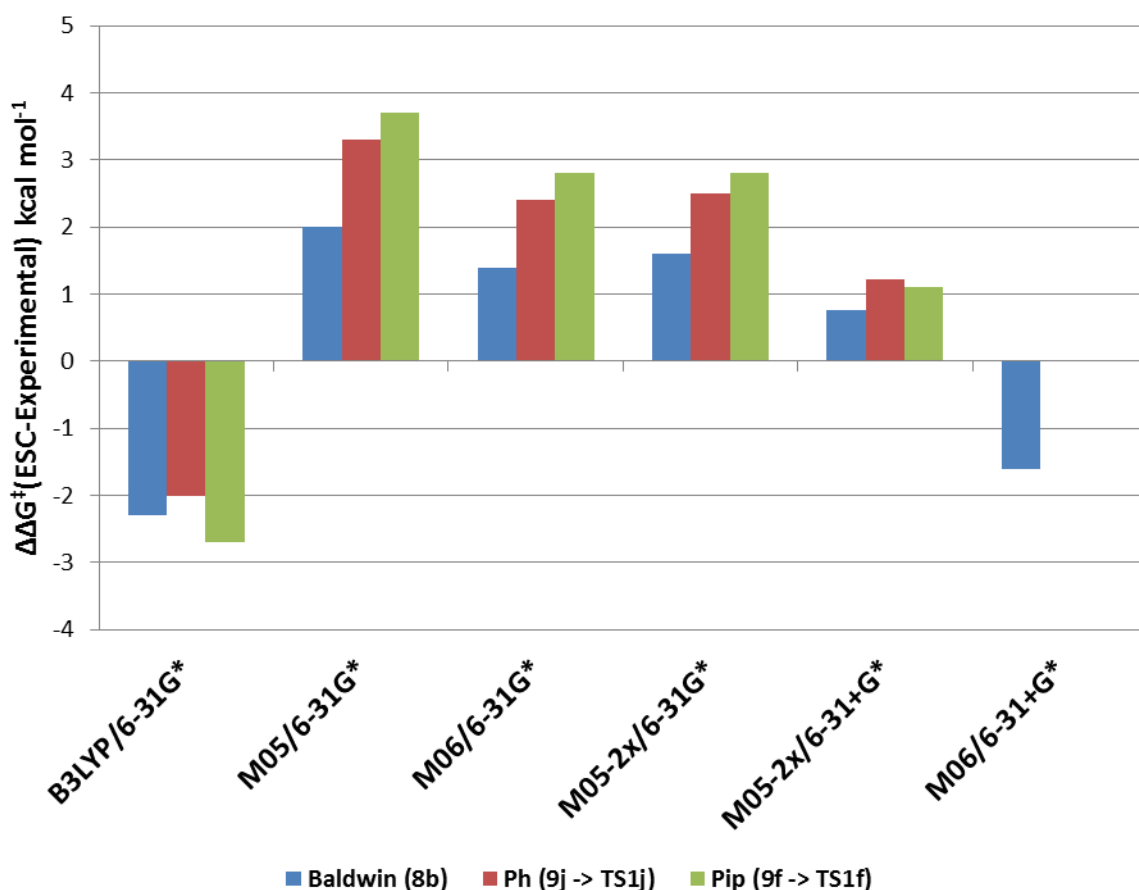

Figure S42: Computational methodology screening for VCPR.

### Assessment of Solvent Effects

The difference in dipole between the VCPR and aromatic-vinylcyclopropane rearrangement transition states for the rearrangement of piperonyl-VCP precursors (*trans*-**9f** and *cis*-**9f**, respectively) was used to assess the potential effect solvent would have on electronic structure calculations (Table S10).

Table S10: Solvation Effect on VCPR and [3,3]-Rearrangement Dipole Moments

| Solvent          | Solvent Properties                 |                                       | Difference in Dipole Moment (Debyes) <sup>[c]</sup> |            |
|------------------|------------------------------------|---------------------------------------|-----------------------------------------------------|------------|
|                  | Dielectric Constant <sup>[a]</sup> | Dipole Moment (Debyes) <sup>[b]</sup> | 9f -> TS1f                                          | 48 -> TS6a |
| Gas Phase (n.a.) | n.a.                               | n.a.                                  | 0.11                                                | 0.74       |
| Toluene          | 2.37                               | 0.36                                  | 0.30                                                | 0.74       |
| Diphenyl Ether   | 3.73                               | 1.30                                  | 0.63                                                | 0.73       |

|              |       |      |      |      |
|--------------|-------|------|------|------|
| 1-Pentanol   | 15.13 | 1.70 | 0.50 | 1.06 |
| Acetonitrile | 35.70 | 3.92 | 0.53 | 1.06 |

[a] Data reported in Gaussian'09 user's reference.<sup>S52</sup> [b] Data reported by National Institute of Standards and Technology (NIST).<sup>S53</sup> [c] Gaussian'09, (U)M05-2X/6-31+G\*, 298 K, solvation parameterised using Self-Consistent Reaction Field (SCRF)<sup>S54</sup> using the Conductor-like Polarizable Continuum Model (CPCM).<sup>S55</sup>

Due to the slightly higher dipole moment for the [3,3]-pathway, more polar solvents (1-pentanol, acetonitrile) gave lower  $\Delta G^\ddagger$  values compared with gas phase or less polar solvents (toluene, diphenyl ether); approximately 1.0 kcal mol<sup>-1</sup> lower energy barrier (**Table S11** and **Figure S46**).

**Table S11:** Solvent Effect on Rearrangement Free Energies of Activation ( $\Delta G^\ddagger$ )

| Solvation     | $\Delta G^\ddagger$ ((U)M05-2X/6-31+G*, 298 K, Gaussian'09) |       |                                                                                             |
|---------------|-------------------------------------------------------------|-------|---------------------------------------------------------------------------------------------|
|               | VCPR                                                        | [3,3] | $\Delta\Delta G^\ddagger$ ( $\Delta G^\ddagger_{\text{VCPR}} - \Delta G^\ddagger_{[3,3]}$ ) |
| Gas Phase     | 28.1                                                        | 25.3  | 2.8                                                                                         |
| Toluene       | 28.2                                                        | 25.5  | 2.7                                                                                         |
| Diphenylether | 28.3                                                        | 25.7  | 2.6                                                                                         |
| 1-Pentanol    | 28.5                                                        | 24.4  | 4.1                                                                                         |
| Acetonitrile  | 28.6                                                        | 24.4  | 4.2                                                                                         |

All units are in kcal mol<sup>-1</sup>.

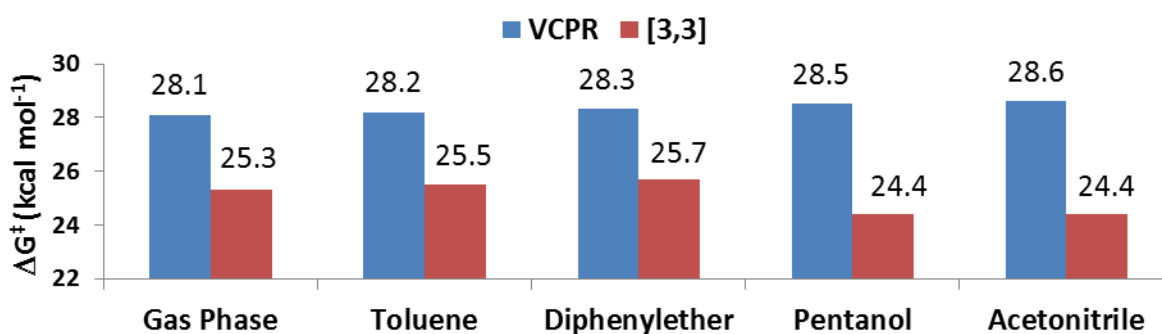

**Figure S43:** Solvent effect on calculated  $\Delta G^\ddagger$  values for the VCPR of **9f** and [3,3]-rearrangement of **48**.

The effect of solvent was also investigated experimentally: A solution of piperonyl-**22a** (19.3 mg, 0.33 mmol) in 0.44 M [D3]acetonitrile (0.75 mL) or [D8]toluene (0.75 mL) was heated in an oil bath at 70 °C for 17 hours. Crude <sup>19</sup>F NMR analysis of the resulting mixture was used to determine relative conversion of rearrangement products (**Table S12**), showing little difference in reaction selectivity between solvents (**Figure S47**).

**Table S12:** Solvent Effect on Thermal Rearrangement of **22a**.

| Solvent          | Average <sup>19</sup> F NMR Integration |            | Relative Percentage (%) <sup>[a]</sup> |            |
|------------------|-----------------------------------------|------------|----------------------------------------|------------|
|                  | VCPR (39)                               | [3,3] (44) | VCPR (39)                              | [3,3] (44) |
| [D3]acetonitrile | 0.9584                                  | 1.0281     | 48                                     | 52         |
| [D6]toluene      | 0.9744                                  | 1.3721     | 42                                     | 58         |

[a] Assumed NMR integration error of ± 5 %.

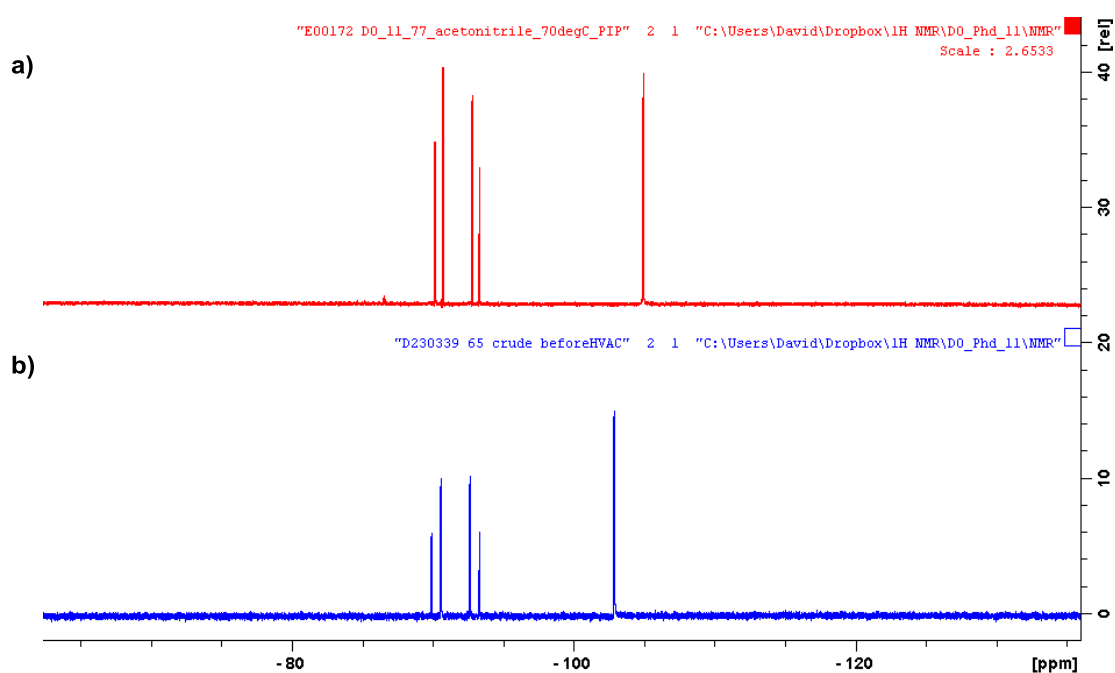**Figure S44:** Crude <sup>19</sup>F NMR for thermal rearrangement of **22a** in a) [D3]acetonitrile and b) [D6]toluene.

### Investigations into Alternative [3,3]-Diradical/Triplet Pathways

Attempts to use transition state **S-TS5** as a starting point to investigate triplet or diradicaloid possibilities failed when all calculations resulted in closed shell compounds ( $S^2 = 0$ ). Instead, our previously reported *transoid* triplet intermediate **S21** was used as a starting point with atom constraints set up between alkenoate carbon and aryl C5 or C2, giving rise to *transoid* and *cisoid* structures, respectively (**Figure S42**). Molecules were manipulated in Spartan'10

to bring reaction centres within approx. 3.0 Å. Energy profiles were examined by bringing the reaction centres closer together along the constraint (3.073 Å to 1.073 Å, over 15 steps) using low level molecular mechanics (UAM1, multiplicity = 3, no MIX keyword used). Higher energy species with imaginary frequencies were examined without constraints and afforded three triplet transition states for the [3,3]-rearrangement, *transoid* **S-TS6** and *cisoid* **S-TS7a** and **S-TS7b**. These were further optimised using (U)B3LYP/6-31G\* methodology with the  $\langle S2 \rangle$  values used to determine multiplicity of the transition state; values of 0 = closed shell, close to 0.75 = diradical and 2.0 = triplet. For triplet calculations the multiplicity was set to 3 and diradical calculations required the additional keyword MIX. For the *transoid* system (**STS-7a**) all three multiplicities gave much higher free energies of activation ( $\Delta G^\ddagger = 37.8$ -53.6 kcal mol<sup>-1</sup>) with respect to the previously optimised closed-shell **S-TS5** ( $\Delta G^\ddagger = 27.8$  kcal mol<sup>-1</sup>). Only a triplet transition state optimised from *cisoid* **S-TS7a** ( $\Delta G^\ddagger = 59.2$  kcal mol<sup>-1</sup>). Alternative *cisoid* **S-TS7b** optimised as a closed shell transition state ( $\Delta G^\ddagger = 25.7$  kcal mol<sup>-1</sup>), the diradical calculations resulted a similar closed shell transition state ( $\langle S2 \rangle = 0$ ). This newly found closed-shell **S-TS7b** and **S-TS5** were further optimised in Gaussian'09 and gave the same  $\Delta G^\ddagger$  value of 23.9 kcal mol<sup>-1</sup>. These investigations confirmed that the *cisoid*-closed shell **S-TS5** is the lowest energy pathway for aromatic-vinylcyclopropane rearrangements.

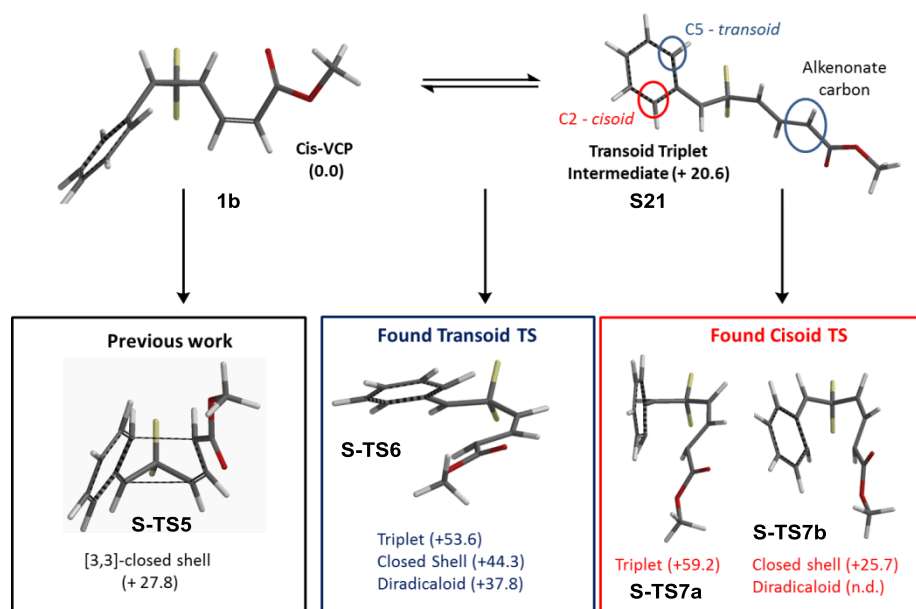

**Figure S45:** Closed-shell, diradical and triplet transition states for [3,3]-rearrangement (units in kcal mol<sup>-1</sup>).



### Arrhenius Plot for divinyl-difluorocyclopropane S3

The kinetic data reported by Erbes and Boland<sup>S11</sup> for the rearrangement of divinyl-S3 was altered into Arrhenius parameters in Excel (**Table S13**) and plotted as described above. The resulting Arrhenius plot (**Figure S49**) and errors (**Figure S50**) gave an experimental  $E_a$  value for the divinylcyclopropane rearrangements as  $(24.0 \pm 0.17)$  kcal mol<sup>-1</sup>; within error of reported value of 23.8 kcal mol<sup>-1</sup>. The pre-exponential factor (A) was calculated as  $7.4 \times 10^{16}$  s<sup>-1</sup>. These values were used to recalculate the activation energy at 298 K.

**Table S13:** Kinetic Data used to generate Arrhenius Plot in **Figure S49**.

| T (K) | 1/T      | k (x 10 <sup>-5</sup> ) s <sup>-1</sup> | ln k    |
|-------|----------|-----------------------------------------|---------|
| 298   | 0.003356 | 0.75                                    | -0.2877 |
| 313   | 0.003195 | 4.94                                    | 1.5974  |
| 323   | 0.003096 | 14.9                                    | 2.7014  |
| 333   | 0.003003 | 47.8                                    | 3.8670  |
| 343   | 0.002915 | 152.0                                   | 5.0239  |

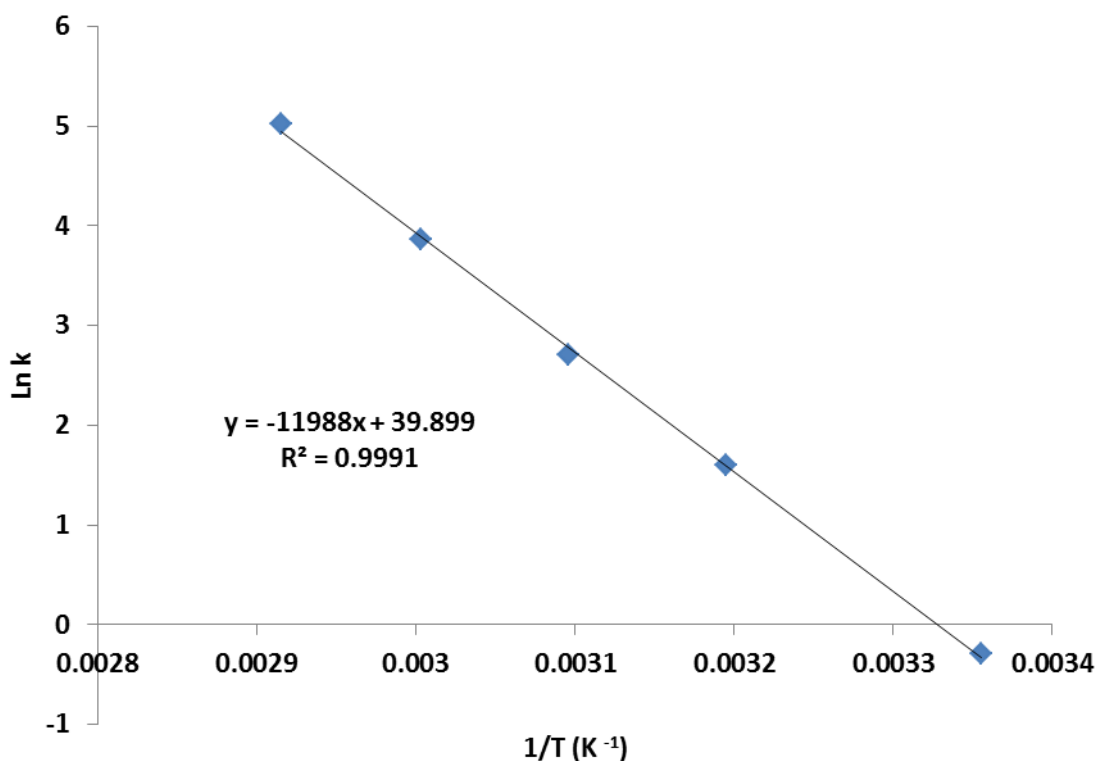

**Figure S46:** Arrhenius plot from literature kinetic data for the [3,3]-rearrangement of S3.

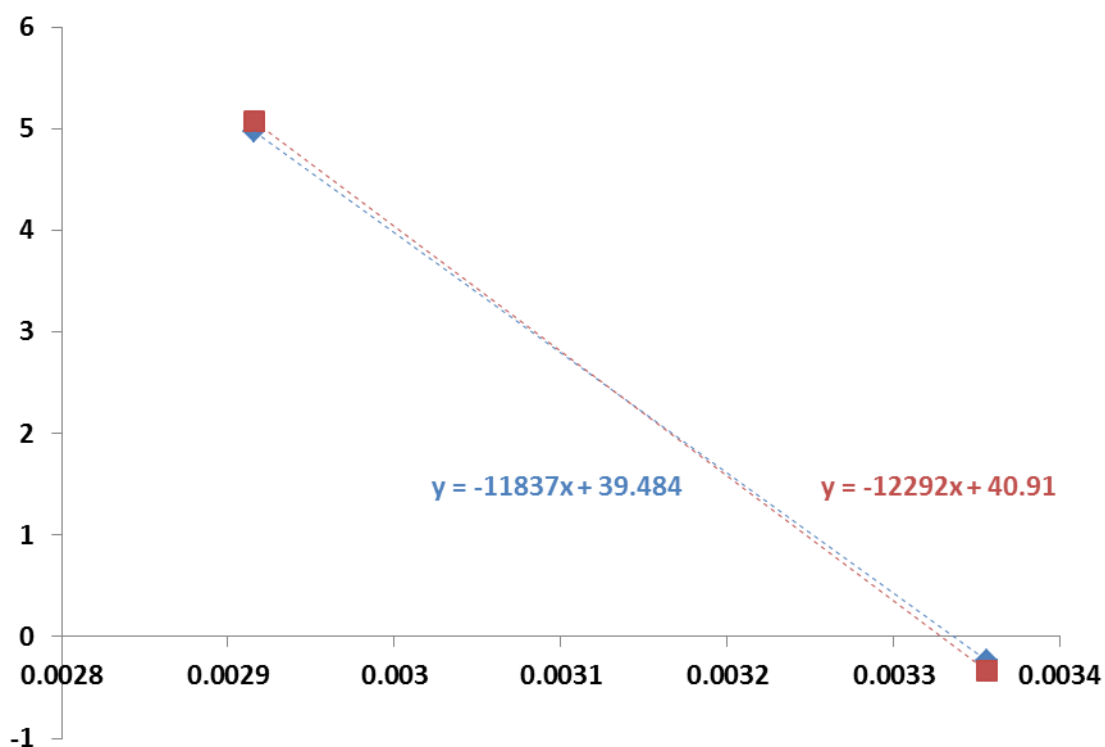

**Figure S50:** Error associated with Arrhenius plot in **Figure S49**.

### [3,3]-Sigmatropic Computational Methodology Screening

We looked to explore the effectiveness of the B3LYP/6-31G\* and M06-2X/6-31G\* calculations of barrier heights ( $\Delta G_{\text{B3LYP}}^\ddagger$  and  $\Delta G_{\text{M062X}}^\ddagger$ , respectively) for divinylcyclopropane<sup>S11,44,45</sup> and heteroaromatic-vinylcyclopropane rearrangements<sup>S46</sup> reported in the literature (**Figure S51**).

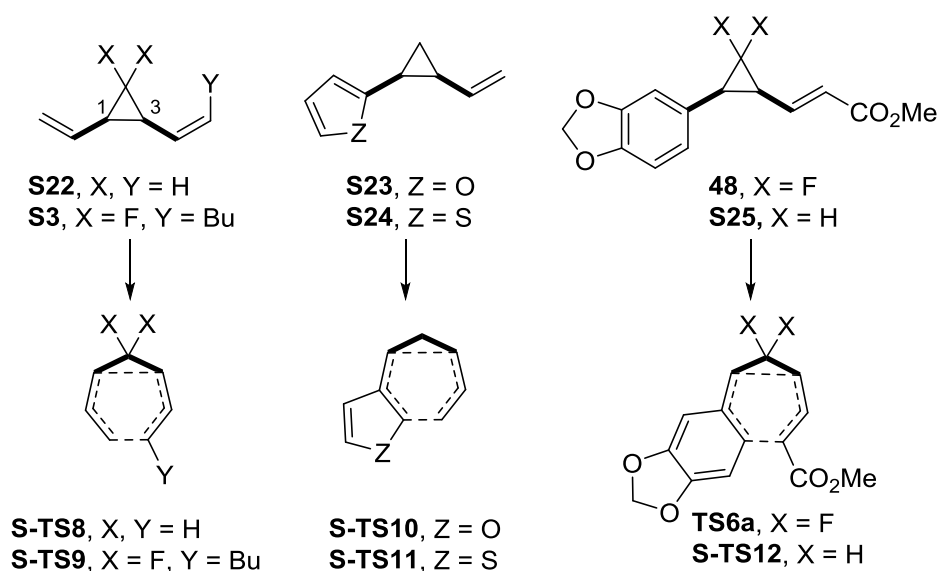

**Figure S51:** [3,3]-precursors and their corresponding transition states examined with electronic structure calculations.

Little difference was observed for the calculated  $\Delta G^\ddagger$  values for the divinylcyclopropane rearrangement of di-VCP **S22** and fluorinated **S3** using the DFT method ( $\Delta G^\ddagger_{\text{B3LYP}}$  difference of  $0.4 \text{ kcal mol}^{-1}$ ) but the Minnesota method gave a  $\Delta G^\ddagger_{\text{M06-2X}}$  difference of  $4.6 \text{ kcal mol}^{-1}$  between systems (**Table S14**). The latter was more consistent with the distal bond of *gem*-difluorocyclopropane being weaker than the corresponding non-fluorinated system.<sup>S56</sup>

Due to the disruption of aromaticity in **S-TS10** and **S-TS11**, the aromatic-vinylcyclopropane rearrangement of furyl-**S23** and thiophenyl-**S24** showed higher  $\Delta G^\ddagger$  values of approximately  $4.0 \text{ kcal mol}^{-1}$  (B3LYP) or  $10.0 \text{ kcal mol}^{-1}$  (M06-2X) than **S22**; this was less significant for piperonyl **48** ( $2.8 \text{ kcal mol}^{-1}$  (B3LYP) and  $6.1 \text{ kcal mol}^{-1}$  (M06-2X)). In our system, the difluorocyclopropyl ring has a beneficial effect on the [3,3]-rearrangement, with  $\Delta G^\ddagger$  values approximately  $8 \text{ kcal mol}^{-1}$  lower than the corresponding non-fluorinated **S25** ( $\Delta \Delta G^\ddagger_{\text{B3LYP}} = 31.8 \text{ kcal mol}^{-1}$  and  $\Delta \Delta G^\ddagger_{\text{M06-2X}} = 33.2 \text{ kcal mol}^{-1}$ ).

**Table S14:** Barriers for [3,3]-rearrangement from electronic structure calculations (ESC) and recalculated experimental Arrhenius data.

| Computational Methodology   | Barriers for [3,3]-Rearrangement ( $\Delta G^\ddagger$ , kcal mol <sup>-1</sup> , gas phase, 298 K) |               |               |               |               |               |
|-----------------------------|-----------------------------------------------------------------------------------------------------|---------------|---------------|---------------|---------------|---------------|
|                             | S22 -> S-TS8                                                                                        | S3 -> S-TS9   | S23-> S-TS10  | S24 -> S-TS11 | 48 -> TS6a    | S25 -> S-TS12 |
| B3LYP/6-31G*                | 21.1                                                                                                | 21.6          | 26.1          | 26.2          | 23.9          | 31.8          |
| M06-2X/6-31G*               | 23.5                                                                                                | 19.2          | 29.7          | 29.8          | 25.6          | 33.2          |
| Experimental <sup>[a]</sup> | 21.0                                                                                                | 17.6          | 25.7          | 27.0          | 26.3          | <i>n.d.</i>   |
| (error)                     | ( $\pm 3.8$ )                                                                                       | ( $\pm 5.9$ ) | ( $\pm 3.0$ ) | ( $\pm 2.6$ ) | ( $\pm 1.9$ ) |               |

[a] All experimental values were recalculated to 298 K to allow comparison with ESC. Arrhenius determination of kinetic data for substrate **S3** provided an experimental  $\Delta G^\ddagger$  which was recalculated to 298 K using methods described by Maskill.<sup>S38</sup> Calculated values of  $\Delta S^\ddagger$  and  $\Delta H^\ddagger$  were used for precursors **S23** and **S24** to recalculated  $\Delta G^\ddagger$  values to 298 K.

It was promising that the majority of calculated free energies of activation were within experimental error, but the size of the errors made it difficult to assess the most accurate method for the [3,3]-rearrangement fully (**Figure S52**). The B3LYP/6-31G\* was the most accurate for the divinylcyclopropane rearrangement with a  $\Delta\Delta G^\ddagger$  value of +0.1 kcal mol<sup>-1</sup>, comparable with Özkan and Zoras' DFT studies ( $\Delta\Delta G^\ddagger = -0.3$  kcal mol<sup>-1</sup>).<sup>S43</sup> In contrast, the M06-2X/6-31G\* calculations gave the best results with difluoro-**S3** ( $\Delta\Delta G^\ddagger = +1.6$  kcal mol<sup>-1</sup>) but the extremely large error associated the experimental free energy of activation ( $\pm 5.9$  kcal mol<sup>-1</sup>) made it difficult for an effective comparison between methods.

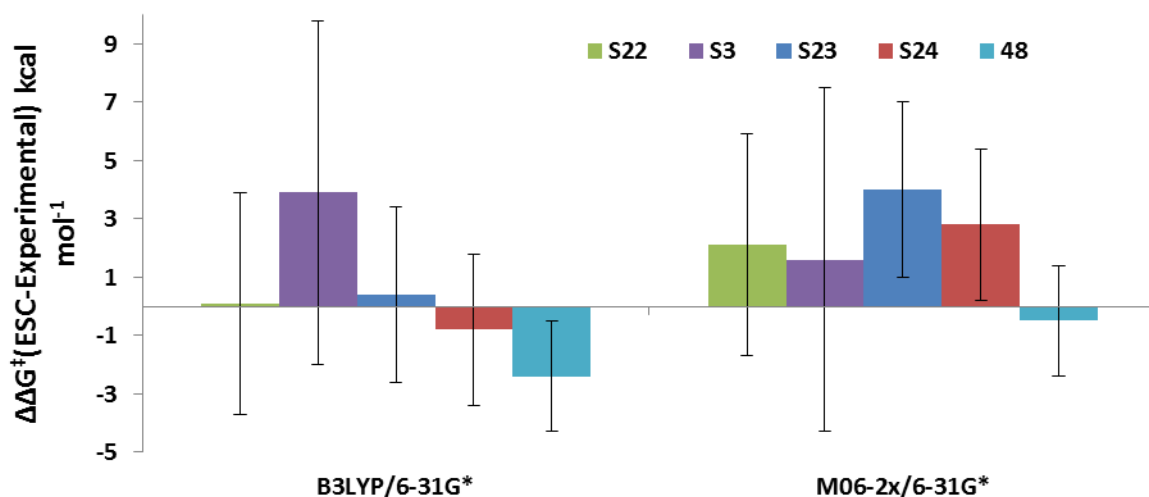

**Figure S52:** Differences between experimental  $\Delta G^\ddagger$  (298 K) and  $\Delta G^\ddagger$  from electronic structure calculations (298 K), plotted as  $\Delta\Delta G^\ddagger$  ( $\Delta G^\ddagger$  (ESC) -  $\Delta G^\ddagger$ (experimental), Gaussian'09, kcal mol<sup>-1</sup>). Expected error associated with calculated data is  $\pm 0.5$  kcal mol<sup>-1</sup>. Error bars represent error associated with experimental data (see **Table S12** for values).

For the aromatic-vinylcyclopropane rearrangement, the closest agreement with experimental values was observed with B3LYP/6-31G\* for heteroaromatic substituents **S23** and **S24** ( $\Delta\Delta G^\ddagger$  values were within 0.8 kcal mol<sup>-1</sup>) but M06-2X/6-31G\* was favoured for piperonyl **48** ( $\Delta\Delta G^\ddagger$  values were within 0.7 kcal mol<sup>-1</sup>).

## Error Associated with T1 and G3(MP2) Calculations

All aromatics examined experimentally were built *de novo* on Spartan'10 and minimised using low level molecular mechanics then the heat of formation calculated using the T1 and G3(MP2) thermochemical recipe. The calculated heat of formation ( $\Delta H_f^\circ$ , **Table 13**) were compared with experimental values to determine the error associated with the calculations (**Figure S53**).

**Table S15:** Experimental and Calculated Heats of Formation

| Compound         | Heat of Formation ( $\Delta H_f^\circ$ , 298 K, kcal mol <sup>-1</sup> ) |       |                                         |         |                                         |
|------------------|--------------------------------------------------------------------------|-------|-----------------------------------------|---------|-----------------------------------------|
|                  | Experimental <sup>[a]</sup>                                              | T1    | $\Delta\Delta H_f^\circ$ <sup>[b]</sup> | G3(MP2) | $\Delta\Delta H_f^\circ$ <sup>[b]</sup> |
| Benzene          | 19.8                                                                     | 18.7  | -1.1                                    | 19.1    | -0.7                                    |
| 1,3-Benzodioxane | -34.1 <sup>[c]</sup>                                                     | -38.5 | -4.4                                    | -38.8   | -4.7                                    |
| Furan            | -8.2                                                                     | -7.7  | 0.5                                     | -7.8    | 0.4                                     |
| Pyrrrole         | 25.9                                                                     | 26.8  | 0.9                                     | 26.7    | 0.8                                     |
| Pyridine         | 33.6                                                                     | 33.0  | -0.6                                    | 33.2    | -0.4                                    |
| Thiophene        | 27.5 <sup>[d]</sup>                                                      | 25.6  | -1.9                                    | 26.0    | -1.5                                    |
| Oxazole          | -3.7                                                                     | -2.4  | 1.3                                     | -2.6    | 1.1                                     |
| Isoxazole        | 18.8                                                                     | 20.9  | 2.1                                     | 20.5    | 1.8                                     |
| Ethane           | -20.2                                                                    | -20.0 | 0.2                                     | -19.9   | 0.3                                     |
| Ethylene         | 12.5                                                                     | 12.4  | -0.1                                    | 12.0    | -0.5                                    |

[a] All values reported by Domalski unless otherwise stated.<sup>S48</sup> [b]  $\Delta\Delta H_f^\circ = (\Delta H_f^\circ \text{ calculated}) - (\Delta H_f^\circ \text{ experimental})$ . [c] Value reported by Cohen.<sup>S50</sup> [d] Value reported by Hubbard and co-workers.<sup>S49</sup>

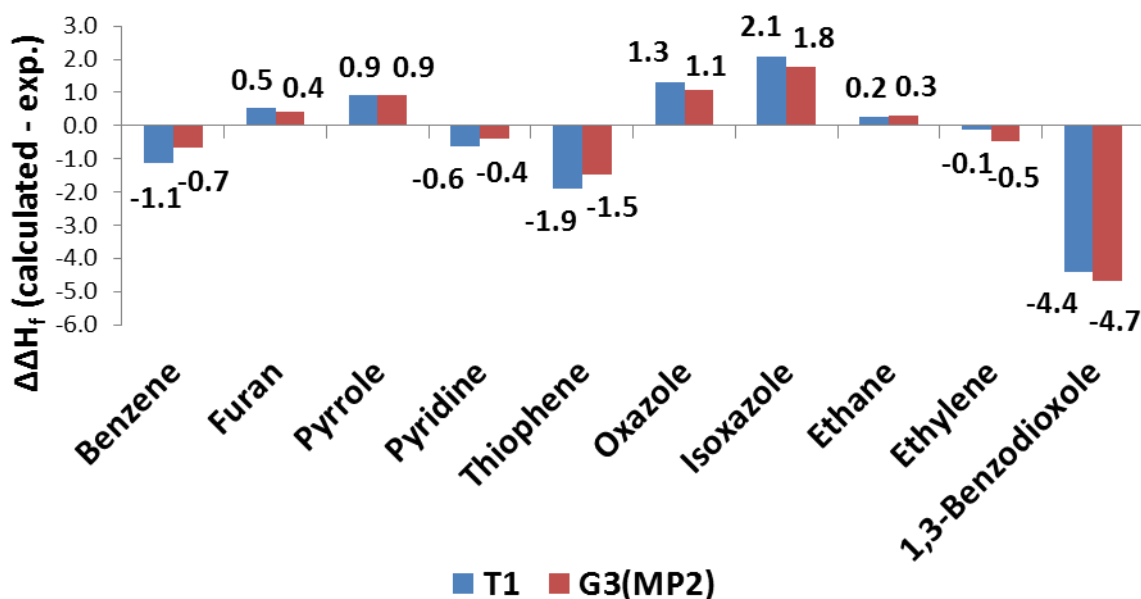

Figure S47: Difference in calculated and experimental heats of formation.

#### Raw Data for Isodesmic Reactions

The enthalpic change ( $\Delta H^\circ$ , B3LYP/6-31G\* and M06-2X/6-31G\*) and heat of formation ( $\Delta H_f$ , T1 and G3(MP2)) for the isodesmic reactions depicted in **Scheme 10** were calculated on Spartan'10 using the method described above.

Raw data for benzene, 1,3-benzodioxole, furan and thiophene are displayed in **Tables S16-S19**.

Table S16: Raw energy values based on isodesmic reaction with benzene.

| Method                          | benzene | Ethane  | Total   | reduced | Ethene | Total   | $\Delta H_f$ or $\Delta H^\circ$ |
|---------------------------------|---------|---------|---------|---------|--------|---------|----------------------------------|
| T1 (kJ mol <sup>-1</sup> )      | 78.22   | -83.67  | -5.45   | 106.59  | 51.70  | 158.29  | 163.74                           |
| G3(MP2) (kJ mol <sup>-1</sup> ) | 80.017  | -83.366 | -3.35   | 106.35  | 50.35  | 156.71  | 160.054                          |
| B3LYP (a.u.)                    | -232.14 | -79.75  | -311.89 | -233.29 | -78.53 | -311.82 | 0.071055                         |
| M062x (a.u.)                    | -232.03 | -79.72  | -311.75 | -233.17 | -78.50 | -311.68 | 0.069946                         |

Table S17: Raw energy values based on isodesmic reaction with 1,3-benzodioxole.

| Method                          | benzodioxole | Ethane | Total   | reduced | Ethene | Total   | $\Delta H_f$ or $\Delta H^\circ$ |
|---------------------------------|--------------|--------|---------|---------|--------|---------|----------------------------------|
| T1 (kJ mol <sup>-1</sup> )      | -161.11      | -83.67 | -244.78 | -136.07 | 51.70  | -84.37  | 160.41                           |
| G3(MP2) (kJ mol <sup>-1</sup> ) | -162.45      | -83.37 | -245.82 | -138.56 | 50.35  | -88.21  | 157.609                          |
| B3LYP (a.u.)                    | -420.65      | -79.75 | -500.40 | -421.81 | -78.53 | -500.34 | 0.0675978                        |
| M062x (a.u.)                    | -420.48      | -79.69 | -500.17 | -421.63 | -78.48 | -500.11 | 0.0659189                        |

**Table S18:** Raw energy values based on isodesmic reaction with thiophene.

| Method                          | thiophene | Ethane | Total   | reduced | Ethene | Total   | $\Delta H_f$ or $\Delta H^\circ$ |
|---------------------------------|-----------|--------|---------|---------|--------|---------|----------------------------------|
| T1 (kJ mol <sup>-1</sup> )      | 107.11    | -83.67 | 51.70   | 76.24   | 51.70  | 127.94  | 76.24                            |
| G3(MP2) (kJ mol <sup>-1</sup> ) | 108.91    | -83.37 | 50.35   | 79.29   | 50.35  | 129.64  | 79.285                           |
| B3LYP (a.u.)                    | -552.93   | -79.75 | -632.68 | -554.11 | -78.53 | -632.64 | 0.040688                         |
| M062x (a.u.)                    | -552.82   | -79.72 | -632.54 | -553.99 | -78.51 | -632.50 | 0.041781                         |

**Table S19:** Raw energy values based on isodesmic reaction with furan.

| Method                          | furan   | Ethane | Total   | reduced | Ethene | Total   | $\Delta H_f$ or $\Delta H^\circ$ |
|---------------------------------|---------|--------|---------|---------|--------|---------|----------------------------------|
| T1 (kJ mol <sup>-1</sup> )      | -32.24  | -83.67 | -115.91 | -73.30  | 51.70  | -21.60  | 94.31                            |
| G3(MP2) (kJ mol <sup>-1</sup> ) | -32.73  | -83.37 | -116.10 | -73.96  | 50.35  | -23.61  | 92.486                           |
| B3LYP (a.u.)                    | -229.95 | -79.75 | -309.70 | -231.12 | -78.53 | -309.68 | 0.0408578                        |
| M062x (a.u.)                    | -229.85 | -79.72 | -309.57 | -231.02 | -78.51 | -309.52 | 0.0430657                        |

All raw values were converted into kcal mol<sup>-1</sup> for comparison (**Table S20**). Differences between  $\Delta H_f$  and  $\Delta H^\circ$  values were used to assess how well the DFT and Minnesota functionals dealt with the loss of aromaticity in the isodesmic reaction (**Figures S50 and S51**).

**Table S20:** Compiled Heats of Formation ( $\Delta H_f$ ) and Enthalpies ( $\Delta H^\circ$ ) for Isodesmic Reaction (all energies are in kcal mol<sup>-1</sup>).

| Method           | benzene | furan | thiophene | 1,3-benzodioxole |
|------------------|---------|-------|-----------|------------------|
| $\Delta H_f$     | T1      | 39.1  | 38.3      | 22.5             |
|                  | G3(MP2) | 38.3  | 37.7      | 22.1             |
| $\Delta H^\circ$ | B3LYP   | 44.6  | 42.4      | 25.6             |
|                  | M062X   | 43.0  | 41.3      | 26.1             |



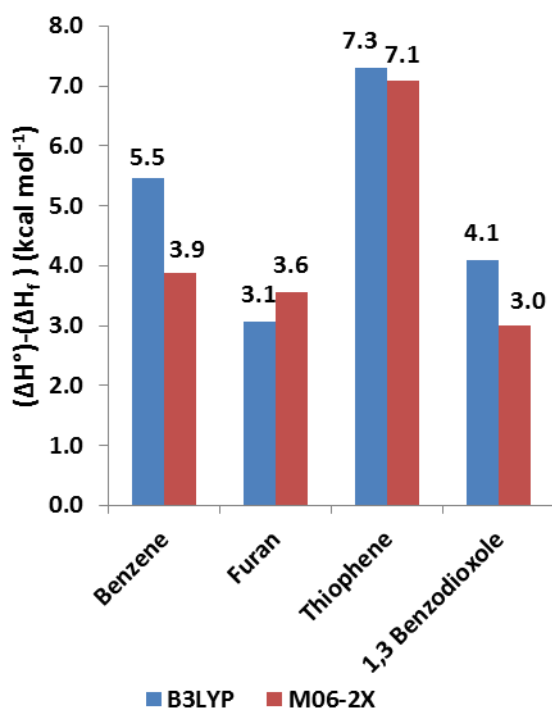

Figure S48: T1 differences between calculated  $\Delta H^\circ$  and  $\Delta H_f$ .

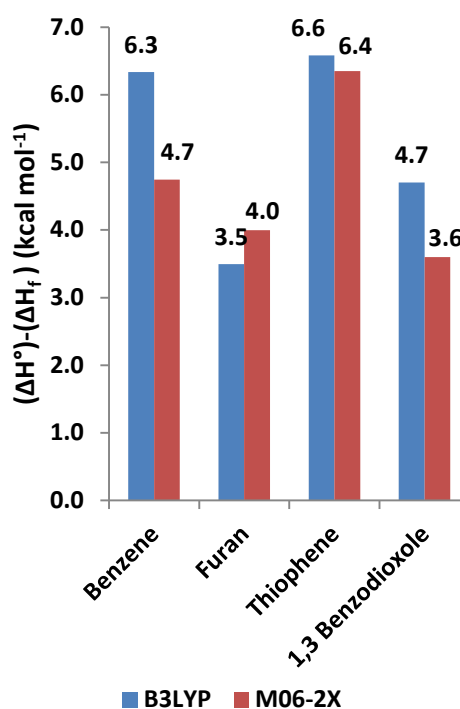

Figure S55: G3(MP2) differences between calculated  $\Delta H^\circ$  and  $\Delta H_f$ .

## Free Energy Values for Computational Predictions

Table S21: Calculated free energies of activation ( $\Delta G^\ddagger$ ) for VCPR and [3,3]-rearrangement.

| VCP | Calculated $\Delta G^\ddagger$ (Gaussian'09, gas phase, 298 K, kcal mol <sup>-1</sup> ) |       |                     |                      |                       |                      |                     |                      |
|-----|-----------------------------------------------------------------------------------------|-------|---------------------|----------------------|-----------------------|----------------------|---------------------|----------------------|
|     | (U)B3LYP <sup>[a]</sup>                                                                 |       | Corrected           |                      | UM052X <sup>[b]</sup> | M062X <sup>[a]</sup> | Corrected           |                      |
|     | VCPR                                                                                    | [3,3] | VCPR <sup>[c]</sup> | [3,3] <sup>[d]</sup> | VCPR                  | [3,3]                | VCPR <sup>[e]</sup> | [3,3] <sup>[f]</sup> |
| 1a  | 26.6                                                                                    | 27.8  | 29.3                | 30.2                 | 29.8                  | 29.5                 | 28.6                | 30.0                 |
| 47  | 35.1                                                                                    | 35.5  | 37.8                | 37.9                 | 38.1                  | 36.5                 | 36.9                | 37.0                 |
| 22a | 24.3                                                                                    | 23.9  | 27.0                | 26.3                 | 28.1                  | 27.0                 | 26.9                | 27.8                 |
| 20a | 30.6                                                                                    | 33.9  | 33.3                | 36.3                 | 32.7                  | 35.0                 | 31.5                | 35.5                 |
| 23a | 22.1                                                                                    | 17.5  | 24.8                | 19.9                 | 25.7                  | 20.7                 | 24.5                | 21.2                 |
| 25a | 25.3                                                                                    | 24.2  | 28.0                | 26.6                 | 32.7                  | 26.1                 | 26.7                | 26.6                 |
| 27a | 22.5                                                                                    | 21.8  | 25.2                | 24.2                 | 26.2                  | 24.2                 | 25.0                | 24.7                 |
| 27a | 26.3                                                                                    | 32.6  | 29.0                | 35.0                 | 30.4                  | 33.0                 | 29.2                | 33.5                 |
| 24a | 22.5                                                                                    | 18.5  | 25.2                | 20.9                 | 26.0                  | 21.2                 | 24.8                | 21.7                 |
| 26a | 25.7                                                                                    | 25.0  | 28.4                | 27.4                 | 29.2                  | 27.5                 | 28.0                | 28.0                 |
| 19a | 26.2                                                                                    | 33.3  | 28.9                | 35.7                 | 28.0                  | 35.6                 | 27.6                | 36.1                 |
| 21a | 24.7                                                                                    | 27.9  | 27.4                | 30.3                 | 28.8                  | 30.8                 | 27.6                | 31.3                 |
| 21b | 29.7                                                                                    | 32.7  | 32.4                | 35.1                 | 34.0                  | 36.7                 | 32.8                | 37.2                 |

[a] Using 6-31G\* basis set. [b] Using 6-31+G\* basis set. [c]  $\Delta G^\ddagger + 2.7$  kcal mol<sup>-1</sup> (UB3LYP/6-31G\*) [d] Calculated  $\Delta G^\ddagger + 2.4$  kcal mol<sup>-1</sup> (B3LYP/6-31G\*) [e] Calculated  $\Delta G^\ddagger - 1.2$  kcal mol<sup>-1</sup> (UM05-2X/6-31+G\*) [f] Calculated  $\Delta G^\ddagger + 0.5$  kcal mol<sup>-1</sup> (M06-2X/6-31G\*). All intermediates and transition states are for conformationally simpler Me ester.

## VCPR Temperature Predictions

Table S22 represents the data used to generate temperature prediction graphs for M05-2x/6-31+G\* and B3LYP/6-31+G\* methods (Figure 12 and Figure S56, respectively).

Table S22: Temperature and  $\Delta G^\ddagger$  data for prediction graphs.

| VCP | Opt. Reaction Temp. |     | VCPR $\Delta G^\ddagger$ |                |
|-----|---------------------|-----|--------------------------|----------------|
|     | $^\circ\text{C}$    | K   | B3LYP/6-31G*             | M05-2X/6-31+G* |
| 22a | 70                  | 343 | 27.0                     | 26.9           |
| 21a | 90                  | 363 | 27.4                     | 27.6           |
| 19a | 95                  | 368 | 28.9                     | 28.0           |
| 1a  | 100                 | 373 | 29.3                     | 28.6           |
| 21b | 160                 | 433 | 32.4                     | 32.8           |
| 47  | 220                 | 493 | 37.8                     | 36.9           |

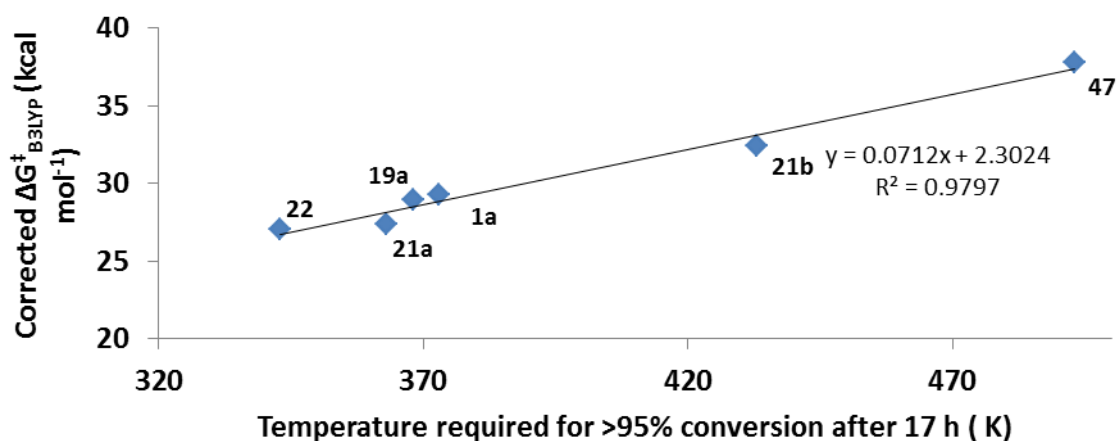

Figure S56: Trend between corrected  $\Delta G^\ddagger$  values for VCPR (UB3LYP/6-31G\*) and rearrangement temperature.

## References

- (S1) Waser, J.; Gaspar, B.; Nambu, H.; Carreira, E. M. *J. Am. Chem. Soc.* **2006**, *128*, 11693.
- (S2) Lohre, C.; Fröhlich, R.; Glorius, F. *Synthesis* **2008**, 2221.
- (S3) Hansch, C.; Leo, A.; Taft, R. W. *Chem. Rev.* **1991**, *91*, 165.
- (S4) Fischer, E. O.; Maasböl, A. *Angew. Chem. Int. Ed.* **1964**, *3*, 580.
- (S5) Agirbas, H.; Jackson, R. A. *J. Chem. Soc., Perkin Trans. 2* **1983**, 739.
- (S6) Jiang, X.; Ji, G. *J. Org. Chem.* **1992**, *57*, 6051.
- (S7) Dust, J. M.; Arnold, D. R. *J. Am. Chem. Soc.* **1983**, *105*, 1221.
- (S8) Creary, X. *Acc. Chem. Res.* **2006**, *39*, 761.
- (S9) Zipse, H. In *Radicals in Synthesis I*; Gansäuer, A., Ed.; Springer Berlin Heidelberg: **2006**; Vol. 263, p 163.
- (S10) Henry, D. J.; Parkinson, C. J.; Mayer, P. M.; Radom, L. *J. Phys. Chem. A* **2001**, *105*, 6750.
- (S11) Erbes, P.; Boland, W. *Helv. Chim. Acta* **1992**, *75*, 766.
- (S12) Creary, X.; Wolf, A.; Miller, K. *Org. Lett.* **1999**, *1*, 1615.
- (S13) Schneider, T. F.; Werz, D. B. *Org. Lett.* **2011**, *13*, 1848.
- (S14) Schneider, T. F.; Kaschel, J.; Werz, D. B. *Angew. Chem. Int. Ed.* **2014**, *53*, 5504.
- (S15) Bruno, I.; Cole, J.; Lommerse, J. M.; Rowland, R. S.; Taylor, R.; Verdonk, M. *J. Comput. Aided Mol. Des.* **1997**, *11*, 525.
- (S16) Lebel, H.; Davi, M. *Adv. Synth. Catal.* **2008**, *350*, 2352.
- (S17) Iwasaki, M.; Kobayashi, Y.; Li, J. P.; Matsuzaka, H.; Ishii, Y.; Hidai, M. *J. Org. Chem.* **1991**, *56*, 1922.
- (S18) Acharya, A.; Eickhoff, J. A.; Jeffrey, C. S. *Synthesis* **2013**, *45*, 1825.
- (S19) Arimitsu, S.; Hammond, G. B. *J. Org. Chem.* **2007**, *72*, 8559.
- (S20) Orr, D.; Percy, J. M.; Tuttle, T.; Kennedy, A. R.; Harrison, Z. A. *Chem. Eur. J.* **2014**, *20*, 14305.
- (S21) Charette, A. B.; Juteau, H.; Lebel, H.; Molinaro, C. *J. Am. Chem. Soc.* **1998**, *120*, 11943.
- (S22) Dolbier Jr, W. R.; Tian, F.; Duan, J.-X.; Li, A.-R.; Ait-Mohand, S.; Bautista, O.; Buathong, S.; Marshall Baker, J.; Crawford, J.; Anselme, P.; Cai, X. H.; Modzelewska, A.; Koroniak, H.; Battiste, M. A.; Chen, Q.-Y. *J. Fluorine Chem.* **2004**, *125*, 459.
- (S23) Wang, F.; Luo, T.; Hu, J.; Wang, Y.; Krishnan, H. S.; Jog, P. V.; Ganesh, S. K.; Prakash, G. K. S.; Olah, G. A. *Angew. Chem. Int. Ed.* **2011**, *50*, 7153.
- (S24) Oshiro, K.; Morimoto, Y.; Amii, H. *Synthesis* **2010**, *12*, 2080.
- (S25) Eusterwiemann, S.; Martinez, H.; Dolbier, W. R. *J. Org. Chem.* **2012**, *77*, 5461.
- (S26) Chen, Q.; Wu, S. *J. Org. Chem.* **1989**, *54*, 3023.
- (S27) Aono, T.; Sasagawa, H.; Fuchibe, K.; Ichikawa, J. *Org. Lett.* **2015**, *17*, 5736.
- (S28) Tian, F.; Kruger, V.; Bautista, O.; Duan, J.-X.; Li, A.-R.; Dolbier Jr, W. R.; Chen, Q.-Y. *Org. Lett.* **2000**, *2*, 563.
- (S29) Hagooly, Y.; Cohen, O.; Rozen, S. *Tetrahedron Lett.* **2009**, *50*, 392.
- (S30) Houk, K. N.; Rondan, N. G.; Mareda, J. *Tetrahedron* **1985**, *41*, 1555.
- (S31) Fuchibe, K.; Koseki, Y.; Aono, T.; Sasagawa, H.; Ichikawa, J. *J. Fluorine Chem.* **2012**, *133*, 52.
- (S32) Thomason, C. S.; Dolbier, W. R. *J. Org. Chem.* **2013**, *78*, 8904.
- (S33) Thomason, C. S.; Wang, L.; Dolbier, W. R. *J. Fluorine Chem.* **2014**, *168*, 34.
- (S34) Li, L.; Wang, F.; Ni, C.; Hu, J. *Angew. Chem. Int. Ed.* **2013**, *52*, 12390.
- (S35) Deng, X.-Y.; Lin, J.-H.; Zheng, J.; Xiao, J.-C. *Chem. Commun.* **2015**, *51*, 8805.

- (S36) Zhou, J.; Campbell-Conroy, E. L.; Silina, A.; Uy, J.; Pierre, F.; Hurley, D. J.; Hilgraf, N.; Frieman, B. A.; DeNinno, M. P. *J. Org. Chem.* **2015**, *80*, 70.
- (S37) Zahnley, T.; Macey, R.; Oster, G. Berkeley Madonna; 8.3.18 ed.; University of California at Berkeley: Berkeley, California, **2010**.
- (S38) Maskill, H., *The Physical Basis of Organic Chemistry*, OUP, Oxford, **1985**, Chapter 6, 242.
- (S39) Zhao, Y. ; Schultz, N. E.; Truhlar, D. G. *J. Chem. Phys.*, **2005**, *123*, 161103.
- (S40) Zhao, Y. ; Truhlar, D. G. *Theor. Chem. Acc.*, **2008**, *120*, 215.
- (S41) Yanai, T.; Tew, D. P.; Handy, N. C. *Chem. Phys. Lett.*, **2004**, *393*, 51. It is clear that the extent of HF exchange does have an effect on the sign of difference between experimental and calculated values; a wider set of systems would have to be examined before the levels of accuracy of (U)B3LYP and CAM-B3LYP could be assessed more fairly. We proceeded with (U)B3LYP because of the similarity of outcomes between the open-shell singlet and {3,3}-rearrangement pathways; they are more alike than those for for CAM-B3LYP.
- (S42) Maas, G. *Chem. Ber.*, **1979**, *112*, 3241.
- (S43) Özkan, I.; Zora, M. *J. Org. Chem.*, **2003**, *68*, 9635.
- (S44) Brown, J. M.; Golding, B. T.; Stofko, J. J. *J. Chem. Soc., Chem. Commun.*, **1973**, 319.
- (S45) Maas, G.; Hummel, C. *Chem. Ber.*, **1980**, *113*, 3679.
- (S46) Ohlinger, W. S.; Klunzinger, P. E. ; Deppmeier, B. J.; Hehre, W. J. *J. Phys. Chem. A*, **2009**, *113*, 2165.
- (S47) Curtiss, L. A. ; Raghavachari, K.; Pople, J. A. *J. Chem. Phys.*, **1993**, *98*, 1293.
- (S48) Domalski, E. S. *J. Phys. Chem. Ref. Data*, **1972**, *1*, 221.
- (S49) Hubbard, W. N.; Scott, D. W.; Frow, F. R.; Waddington, G. *J. Am. Chem. Soc.*, **1955**, *77*, 5855.
- (S50) Cohen, N. *J. Phys. Chem. Ref. Data*, 1996, *25*, 1411-1481.
- (S51) Lewis, D. K.; Charney, D. J.; Kalra, B. L.; Plate, A.-M.; Woodard, M. H.; Cianciosi, S. J.; Baldwin, J. E. *J. Phys. Chem. A* **1997**, *101*, 4097.
- (S52) [http://www.gaussian.com/g\\_tech/g\\_ur/k\\_scrf.htm](http://www.gaussian.com/g_tech/g_ur/k_scrf.htm), Accessed on 9th Nov. 2015.
- (S53) Nelson, R. D., Lide, D. R., Maryott, A. A., & United States. National Bureau of Standards. (1967). Selected values of electric dipole moments for molecules in the gas phase. Washington, D.C.: U.S. Dept. of Commerce, National Bureau of Standards. (<http://www.nist.gov/data/nsrds/NSRDS-NBS-10.pdf>, Accessed 9th Nov. 2015).
- (S54) Tomasi, J.; Mennucci, B.; Cammi, R. *Chem. Rev.* **2005**, *105*, 2999.
- (S55) Cossi, M.; Rega, N.; Scalmani, G.; Barone, V. *J. Comput. Chem.* **2003**, *24*, 669.
- (S56) Dolbier, W. R. *Acc. Chem. Res.* **1981**, *14*, 195.

## Cartesian Coordinates

Cartesian Coordinates used in electronic structure calculations – Spartan'10 structures  
(Gaussian'09 energy values provided if obtained). All energies are in a.u..

### Triage: Cyclopropane Substitution

#### Pyyrole SM (9a)

G = -830.0446014 a.u.

vi = none

Cartesian Coordinates (Angstroms)

|    | Atom  | X          | Y          | Z          |
|----|-------|------------|------------|------------|
| 1  | C C1  | 1.7222269  | 1.2445885  | -0.9729440 |
| 2  | C C2  | 0.6041819  | 1.6925847  | -0.1197857 |
| 3  | C C3  | 0.9304149  | 0.1385579  | -0.3669379 |
| 4  | H H3  | -0.2634018 | 2.0265621  | -0.6880495 |
| 5  | H H6  | 1.3972895  | -0.3352988 | 0.4928236  |
| 6  | C C10 | 0.0096991  | -0.6684673 | -1.1704285 |
| 7  | H H11 | -0.3761963 | -0.2280125 | -2.0883867 |
| 8  | C C11 | -0.4005248 | -1.9064327 | -0.8511647 |
| 9  | H H12 | -0.0564018 | -2.4218961 | 0.0407895  |
| 10 | C C12 | -1.3494274 | -2.6233645 | -1.7272019 |
| 11 | O O1  | -1.8337068 | -2.1932897 | -2.7572939 |
| 12 | O O2  | -1.6283020 | -3.8532978 | -1.2286266 |
| 13 | C C13 | -2.5405183 | -4.6357388 | -2.0122175 |
| 14 | H H5  | -3.4923969 | -4.1115587 | -2.1331000 |
| 15 | H H13 | -2.6804404 | -5.5652310 | -1.4591559 |
| 16 | H H14 | -2.1218863 | -4.8377263 | -3.0022856 |
| 17 | F F1  | 1.6247087  | 1.4521976  | -2.3073350 |
| 18 | F F2  | 3.0024035  | 1.4205751  | -0.5768409 |
| 19 | C C4  | 0.7970878  | 2.2851547  | 1.2148360  |
| 20 | C C5  | 1.8863411  | 2.8913793  | 1.8170170  |
| 21 | C C6  | 1.4964665  | 3.2807468  | 3.1275918  |
| 22 | C C7  | 0.1816452  | 2.9031882  | 3.2976489  |
| 23 | H H1  | 2.8510224  | 3.0395555  | 1.3549197  |
| 24 | H H8  | 2.1102781  | 3.7860042  | 3.8606918  |
| 25 | H H9  | -0.4878149 | 3.0144079  | 4.1384141  |
| 26 | N N1  | -0.2348714 | 2.3028757  | 2.1350296  |
| 27 | H H2  | -1.1478764 | 1.9019360  | 1.9819925  |

#### Pyyrole TS2 (TS1aa)

G = -830.419263

vi = i78

S<sup>2</sup> = 0.457

Cartesian Coordinates (Angstroms)

|   | Atom | X          | Y         | Z         |
|---|------|------------|-----------|-----------|
| 1 | C C  | -0.9297737 | 2.5748429 | 0.6568401 |

|    |   |     |            |            |            |
|----|---|-----|------------|------------|------------|
| 2  | C | C2  | -1.9194433 | 1.6312626  | 0.6608880  |
| 3  | C | C3  | -1.6411990 | 0.2517920  | 0.7737971  |
| 4  | C | C4  | 0.4710368  | 2.1238864  | 0.5119996  |
| 5  | C | C5  | 0.6265790  | 1.0214606  | -0.4882548 |
| 6  | H | H   | -1.1171696 | 3.6410222  | 0.7171927  |
| 7  | H | H7  | -2.9595671 | 1.9256767  | 0.5328070  |
| 8  | H | H8  | -0.7662823 | -0.1029137 | 1.3009722  |
| 9  | H | H12 | -0.1240240 | 0.9537771  | -1.2623941 |
| 10 | F | F1  | 1.2877910  | 3.1931977  | 0.1719855  |
| 11 | F | F2  | 1.0287529  | 1.6979289  | 1.7555366  |
| 12 | C | C11 | -2.6538475 | -0.7310434 | 0.3954601  |
| 13 | O | O1  | -3.7440986 | -0.4774870 | -0.0947453 |
| 14 | O | O2  | -2.2384745 | -2.0004546 | 0.6602510  |
| 15 | C | C12 | -3.1717980 | -3.0280382 | 0.3079669  |
| 16 | H | H1  | -4.1123292 | -2.9029289 | 0.8523623  |
| 17 | H | H9  | -2.6929097 | -3.9684920 | 0.5846646  |
| 18 | H | H10 | -3.3842153 | -3.0079672 | -0.7652038 |
| 19 | C | C1  | 1.8411946  | 0.3622857  | -0.6905360 |
| 20 | C | C6  | 2.2631551  | -0.4716555 | -1.7562523 |
| 21 | C | C7  | 3.5614344  | -0.9103603 | -1.4767628 |
| 22 | C | C8  | 3.9309200  | -0.3557429 | -0.2484364 |
| 23 | H | H3  | 1.6666996  | -0.7030954 | -2.6285180 |
| 24 | H | H5  | 4.1791181  | -1.5561366 | -2.0853420 |
| 25 | H | H11 | 4.8492544  | -0.4533396 | 0.3134152  |
| 26 | N | N1  | 2.9011554  | 0.3967289  | 0.2113611  |
| 27 | H | H6  | 2.8480404  | 0.8957936  | 1.0889455  |

### pyyrole\_higher\_energyTS2 (TS1ab)

G = -830.414696

iv = i86

S<sup>2</sup> = 0.5102

#### Cartesian Coordinates (Angstroms)

| Atom     | X          | Y          | Z          |
|----------|------------|------------|------------|
| 1 C C    | -0.6158183 | 2.7256632  | 0.6820107  |
| 2 C C2   | -1.5971922 | 2.1028680  | -0.0343527 |
| 3 C C3   | -1.6947996 | 0.6924256  | -0.0975346 |
| 4 C C4   | 0.4992112  | 1.9015225  | 1.2220471  |
| 5 C C5   | 0.9748909  | 0.8813229  | 0.2312319  |
| 6 H H    | -0.5893481 | 3.7953210  | 0.8584969  |
| 7 H H7   | -2.3084203 | 2.6842247  | -0.6185155 |
| 8 H H8   | -1.3530473 | 0.0711430  | 0.7187428  |
| 9 H H12  | 0.8034239  | 1.1175807  | -0.8108546 |
| 10 F F1  | 1.5520191  | 2.7254997  | 1.5953164  |
| 11 F F2  | 0.1389744  | 1.2638429  | 2.4199903  |
| 12 C C11 | -2.4700560 | 0.0560454  | -1.1581920 |
| 13 O O1  | -3.0479337 | 0.6343226  | -2.0667899 |
| 14 O O2  | -2.4755496 | -1.3002263 | -1.0228217 |
| 15 C C12 | -3.2164866 | -2.0059029 | -2.0242332 |
| 16 H H1  | -4.2783074 | -1.7449992 | -1.9780600 |
| 17 H H9  | -3.0760518 | -3.0653510 | -1.8034635 |
| 18 H H10 | -2.8431902 | -1.7687789 | -3.0250429 |
| 19 C C1  | 1.9005424  | -0.1117304 | 0.5589328  |

|    |   |     |           |            |            |
|----|---|-----|-----------|------------|------------|
| 20 | C | C6  | 2.3766330 | -0.5907480 | 1.8048456  |
| 21 | C | C7  | 3.2738964 | -1.6361421 | 1.5563537  |
| 22 | C | C8  | 3.3447797 | -1.8097260 | 0.1746747  |
| 23 | H | H3  | 2.0712456 | -0.1937930 | 2.7607488  |
| 24 | H | H5  | 3.8158363 | -2.2172635 | 2.2895826  |
| 25 | H | H11 | 3.9124580 | -2.5151602 | -0.4157203 |
| 26 | N | N1  | 2.5264033 | -0.8948515 | -0.4121237 |
| 27 | H | H6  | 2.3758869 | -0.7971094 | -1.4052698 |

### Furan trans-SM (9b)

Spartan'10: G = -850.314059 vi = none

Gaussian'09: B3LYP/6-31G\*, G = -850.319618 vi = none

Gaussian'09: M05-2X/6-31G\*, G = -850.262612, vi = none

|       |   | Cartesian Coordinates (Angstroms) |            |            |            |
|-------|---|-----------------------------------|------------|------------|------------|
| Atom  |   | X                                 | Y          | Z          |            |
| ----- |   | -----                             | -----      | -----      |            |
| 1     | C | C1                                | 1.5992207  | 1.3955614  | -0.9776466 |
| 2     | C | C2                                | 0.5194974  | 1.8052430  | -0.0580500 |
| 3     | C | C3                                | 0.8775038  | 0.2658666  | -0.3303277 |
| 4     | H | H3                                | -0.4002896 | 2.1204185  | -0.5444083 |
| 5     | H | H6                                | 1.4087112  | -0.1989848 | 0.4965651  |
| 6     | C | C10                               | -0.0692639 | -0.5633929 | -1.0807464 |
| 7     | H | H11                               | -0.5451553 | -0.1204950 | -1.9541452 |
| 8     | C | C11                               | -0.3946896 | -1.8258644 | -0.7635527 |
| 9     | H | H12                               | 0.0391353  | -2.3439339 | 0.0867471  |
| 10    | C | C12                               | -1.3721319 | -2.5700978 | -1.5853767 |
| 11    | O | O1                                | -1.9604997 | -2.1384533 | -2.5585899 |
| 12    | O | O2                                | -1.5371983 | -3.8286142 | -1.1099537 |
| 13    | C | C13                               | -2.4677534 | -4.6398049 | -1.8414309 |
| 14    | H | H5                                | -3.4717553 | -4.2079556 | -1.7983632 |
| 15    | H | H13                               | -2.4506879 | -5.6161272 | -1.3558111 |
| 16    | H | H14                               | -2.1651118 | -4.7245612 | -2.8886582 |
| 17    | F | F1                                | 1.4275165  | 1.6056448  | -2.3021574 |
| 18    | F | F2                                | 2.8925579  | 1.6160802  | -0.6434690 |
| 19    | C | C4                                | 0.7705242  | 2.3994701  | 1.2599089  |
| 20    | C | C5                                | 1.8869409  | 2.7841676  | 1.9494628  |
| 21    | C | C6                                | 1.4335592  | 3.2644071  | 3.2204022  |
| 22    | C | C7                                | 0.0786439  | 3.1404409  | 3.2120022  |
| 23    | H | H1                                | 2.9039660  | 2.7376631  | 1.5907183  |
| 24    | H | H8                                | 2.0403843  | 3.6562081  | 4.0247172  |
| 25    | H | H9                                | -0.6983851 | 3.3741271  | 3.9236340  |
| 26    | O | O3                                | -0.3452394 | 2.6129866  | 2.0285292  |

### Furan TS2 (TS1bb)

Spartan'10: G = -850.28681, vi = i125, S^2 = 0.5808

Gaussian'09: B3LYP/6-31G\*, G = -850.284463, vi = i137, S^2 = 0.57

Gaussian'09: M05-2X/6-31G\*, G = -850.221609, vi = i163, S^2 = 0.75

|       |  | Cartesian Coordinates (Angstroms) |       |       |
|-------|--|-----------------------------------|-------|-------|
| Atom  |  | X                                 | Y     | Z     |
| ----- |  | -----                             | ----- | ----- |

|    |   |     |            |            |            |
|----|---|-----|------------|------------|------------|
| 1  | C | C   | -0.8561031 | 2.7015691  | 0.3283079  |
| 2  | C | C2  | -1.8381630 | 1.8024358  | 0.0383813  |
| 3  | C | C3  | -1.6444484 | 0.4102119  | 0.2272503  |
| 4  | C | C4  | 0.5072269  | 2.1790487  | 0.6288748  |
| 5  | C | C5  | 0.8856784  | 1.0394530  | -0.2712286 |
| 6  | H | H   | -0.9995893 | 3.7763684  | 0.3174435  |
| 7  | H | H7  | -2.7826728 | 2.1292823  | -0.3926797 |
| 8  | H | H8  | -1.0099284 | 0.0361089  | 1.0187846  |
| 9  | H | H12 | 0.4705459  | 1.0412851  | -1.2696769 |
| 10 | F | F1  | 1.4360242  | 3.2007638  | 0.5162551  |
| 11 | F | F2  | 0.6134274  | 1.7738239  | 1.9674583  |
| 12 | C | C11 | -2.4989795 | -0.5525386 | -0.4685442 |
| 13 | O | O1  | -3.3684446 | -0.2715912 | -1.2784601 |
| 14 | O | O2  | -2.2061722 | -1.8278254 | -0.1011751 |
| 15 | C | C12 | -2.9862758 | -2.8407750 | -0.7484711 |
| 16 | H | H1  | -4.0493679 | -2.7126694 | -0.5253266 |
| 17 | H | H9  | -2.6237993 | -3.7896870 | -0.3511872 |
| 18 | H | H10 | -2.8484901 | -2.8009163 | -1.8330240 |
| 19 | C | C1  | 2.0038465  | 0.2433660  | -0.0273076 |
| 20 | C | C6  | 2.8291747  | 0.0348828  | 1.0837613  |
| 21 | C | C7  | 3.7855008  | -0.9333375 | 0.7106043  |
| 22 | C | C8  | 3.4978427  | -1.2782298 | -0.5873676 |
| 23 | H | H3  | 2.7222504  | 0.5366346  | 2.0329496  |
| 24 | H | H5  | 4.5837052  | -1.3373896 | 1.3175395  |
| 25 | H | H11 | 3.9437590  | -1.9756074 | -1.2810134 |
| 26 | O | O3  | 2.4334523  | -0.5846670 | -1.0521485 |

### furan\_higher\_energyTS2 (TS1ba)

G = -850.277257

iv = i117

S<sup>2</sup> = 0.600

Cartesian Coordinates (Angstroms)

|    | Atom | X   | Y          | Z          |            |
|----|------|-----|------------|------------|------------|
| 1  | C    | C   | -0.9502546 | 2.6495991  | 0.6501376  |
| 2  | C    | C2  | -1.8908863 | 1.6636452  | 0.6340407  |
| 3  | C    | C3  | -1.5252413 | 0.2997528  | 0.7679050  |
| 4  | C    | C4  | 0.4866883  | 2.2452973  | 0.5815975  |
| 5  | C    | C5  | 0.6994623  | 1.1466886  | -0.4230640 |
| 6  | H    | H   | -1.1843317 | 3.7083129  | 0.6705550  |
| 7  | H    | H7  | -2.9410498 | 1.8946944  | 0.4667669  |
| 8  | H    | H8  | -0.6672285 | 0.0082292  | 1.3580427  |
| 9  | H    | H12 | 0.0014180  | 1.1086166  | -1.2480338 |
| 10 | F    | F1  | 1.2635235  | 3.3417125  | 0.2455922  |
| 11 | F    | F2  | 0.9578758  | 1.8500449  | 1.8288746  |
| 12 | C    | C11 | -2.4336857 | -0.7569674 | 0.3243831  |
| 13 | O    | O1  | -3.5074436 | -0.5836509 | -0.2312859 |
| 14 | O    | O2  | -1.9309470 | -1.9884494 | 0.6061859  |
| 15 | C    | C12 | -2.7538814 | -3.0880991 | 0.1987920  |
| 16 | H    | H1  | -3.7287557 | -3.0463091 | 0.6926392  |
| 17 | H    | H9  | -2.2124283 | -3.9867342 | 0.4969680  |



|    |   |     |            |            |            |
|----|---|-----|------------|------------|------------|
| 18 | H | H10 | -2.9090023 | -3.0753115 | -0.8840734 |
| 19 | C | C1  | 1.8920642  | 0.4419550  | -0.5879881 |
| 20 | C | C6  | 2.3133656  | -0.4200912 | -1.6085995 |
| 21 | C | C7  | 3.5834925  | -0.9104235 | -1.2387796 |
| 22 | C | C8  | 3.8752209  | -0.3326880 | -0.0273526 |
| 23 | H | H3  | 1.7534328  | -0.6493108 | -2.5047380 |
| 24 | H | H5  | 4.2111886  | -1.5983851 | -1.7876640 |
| 25 | H | H11 | 4.7235775  | -0.4012302 | 0.6371705  |
| 26 | O | O3  | 2.8738262  | 0.4791018  | 0.3819280  |

### para-Pyridine-N-oxide SM (9c)

G = -943.714388

vi = none

| Cartesian Coordinates (Angstroms) |      |     |            |            |            |
|-----------------------------------|------|-----|------------|------------|------------|
|                                   | Atom | X   | Y          | Z          |            |
| -----                             |      |     |            |            |            |
| 1                                 | C    | C1  | 1.3089641  | 1.2878086  | -1.4497207 |
| 2                                 | C    | C2  | 0.3057078  | 1.5125208  | -0.3822889 |
| 3                                 | C    | C3  | 0.7951372  | 0.0499645  | -0.8058908 |
| 4                                 | H    | H3  | -0.6826092 | 1.7431318  | -0.7723904 |
| 5                                 | H    | H6  | 1.4675209  | -0.4016004 | -0.0798213 |
| 6                                 | C    | C10 | -0.1475861 | -0.8399612 | -1.4924370 |
| 7                                 | H    | H11 | -0.7435160 | -0.4144786 | -2.2979791 |
| 8                                 | C    | C11 | -0.3306841 | -2.1327832 | -1.1854696 |
| 9                                 | H    | H12 | 0.2308402  | -2.6289737 | -0.3990166 |
| 10                                | C    | C12 | -1.3267131 | -2.9400203 | -1.9226782 |
| 11                                | O    | O1  | -2.0384947 | -2.5410180 | -2.8245489 |
| 12                                | O    | O2  | -1.3530146 | -4.2104131 | -1.4542092 |
| 13                                | C    | C13 | -2.2945397 | -5.0801688 | -2.1008460 |
| 14                                | H    | H5  | -3.3109551 | -4.6904395 | -1.9982644 |
| 15                                | H    | H13 | -2.1988666 | -6.0424089 | -1.5969908 |
| 16                                | H    | H14 | -2.0596651 | -5.1776157 | -3.1644068 |
| 17                                | F    | F1  | 0.9485834  | 1.5578329  | -2.7241156 |
| 18                                | F    | F2  | 2.6047735  | 1.6327810  | -1.2590384 |
| 19                                | C    | C4  | 0.5748704  | 2.0527265  | 0.9723227  |
| 20                                | N    | N1  | 0.9519961  | 3.0708098  | 3.5869269  |
| 21                                | C    | C6  | -0.4849677 | 2.5780627  | 1.7269249  |
| 22                                | C    | C7  | 1.8381277  | 2.0634026  | 1.5880374  |
| 23                                | C    | C8  | 2.0043379  | 2.5628860  | 2.8639135  |
| 24                                | C    | C9  | -0.2895778 | 3.0730703  | 3.0006694  |
| 25                                | H    | H2  | -1.4913534 | 2.6050752  | 1.3191932  |
| 26                                | H    | H1  | 2.7153381  | 1.6911372  | 1.0725650  |
| 27                                | H    | H4  | 2.9491794  | 2.6021993  | 3.3891100  |
| 28                                | H    | H7  | -1.0668534 | 3.4896658  | 3.6269169  |
| 29                                | O    | O3  | 1.1240199  | 3.5268064  | 4.7635328  |

### para-pyridine-N-oxide TS2 (TS1c)

G = -943.680817

vi= i173

S^2 = 0.6244

| Cartesian Coordinates (Angstroms) |      |   |   |   |  |
|-----------------------------------|------|---|---|---|--|
|                                   | Atom | X | Y | Z |  |

|    |   |     |            |            |            |
|----|---|-----|------------|------------|------------|
| 1  | C | C   | -0.7442934 | 2.9911665  | -0.6529612 |
| 2  | C | C2  | -1.8633238 | 2.2189125  | -0.6559668 |
| 3  | C | C3  | -1.8768379 | 0.9614702  | 0.0125223  |
| 4  | C | C4  | 0.5056189  | 2.3730776  | -0.1201484 |
| 5  | C | C5  | 0.6538498  | 0.9460111  | -0.5710700 |
| 6  | H | H   | -0.6970805 | 4.0005318  | -1.0464526 |
| 7  | H | H7  | -2.7503323 | 2.5120346  | -1.2138959 |
| 8  | H | H8  | -1.3399625 | 0.8184490  | 0.9404952  |
| 9  | H | H12 | 0.2045073  | 0.7258017  | -1.5310947 |
| 10 | F | F1  | 1.6088236  | 3.1107358  | -0.5101945 |
| 11 | F | F2  | 0.5285161  | 2.4437114  | 1.2816101  |
| 12 | C | C1  | 1.6190072  | 0.0436571  | -0.0843508 |
| 13 | N | N1  | 3.5077418  | -1.8693317 | 0.8212471  |
| 14 | C | C7  | 1.8384409  | -1.1962806 | -0.7581019 |
| 15 | C | C8  | 2.4134554  | 0.2521798  | 1.0854579  |
| 16 | C | C9  | 3.3234735  | -0.6801557 | 1.5006845  |
| 17 | C | C10 | 2.7505123  | -2.1100167 | -0.3093180 |
| 18 | H | H2  | 1.2716721  | -1.4303514 | -1.6542811 |
| 19 | H | H6  | 2.3060988  | 1.1634289  | 1.6585467  |
| 20 | H | H5  | 3.9580480  | -0.5786565 | 2.3711521  |
| 21 | H | H3  | 2.9607491  | -3.0624405 | -0.7773622 |
| 22 | C | C11 | -2.8422352 | -0.0682516 | -0.3784039 |
| 23 | O | O1  | -3.6244498 | 0.0175318  | -1.3119035 |
| 24 | O | O2  | -2.7589742 | -1.1547562 | 0.4310049  |
| 25 | C | C12 | -3.6624428 | -2.2222009 | 0.1130110  |
| 26 | H | H1  | -4.7003788 | -1.8921776 | 0.2148756  |
| 27 | H | H9  | -3.4417473 | -3.0160126 | 0.8275249  |
| 28 | H | H10 | -3.5038444 | -2.5707545 | -0.9116447 |
| 29 | O | O3  | 4.3553882  | -2.7273136 | 1.2290179  |

## 2-thiophene SM (9d)

Spartan'10: G = -1173.29592, vi = none

Gaussian'09: B3LYP/6-31G\*, G = -1173.30199, vi = none

Gaussian'09: M05-2X/6-31G\*, G = -1173.23053, vi = none

Cartesian Coordinates (Angstroms)

| Atom     | X          | Y          | Z          |
|----------|------------|------------|------------|
| 1 C C1   | 1.6447102  | 1.2814457  | -0.9375890 |
| 2 C C2   | 0.5212287  | 1.7458593  | -0.0943692 |
| 3 C C3   | 0.8411195  | 0.1957362  | -0.3104794 |
| 4 H H3   | -0.3426689 | 2.0754370  | -0.6688474 |
| 5 H H6   | 1.3040248  | -0.2653453 | 0.5585792  |
| 6 C C10  | -0.0785972 | -0.6272681 | -1.1025299 |
| 7 H H11  | -0.4640952 | -0.2034661 | -2.0283529 |
| 8 C C11  | -0.4802431 | -1.8616494 | -0.7637583 |
| 9 H H12  | -0.1388546 | -2.3582980 | 0.1397290  |
| 10 C C12 | -1.4198937 | -2.6011787 | -1.6329982 |
| 11 O O1  | -1.8957629 | -2.1937891 | -2.6757460 |
| 12 O O2  | -1.6963244 | -3.8212538 | -1.1117456 |
| 13 C C13 | -2.6006195 | -4.6235892 | -1.8848499 |
| 14 H H5  | -3.5553537 | -4.1076858 | -2.0178802 |

|    |   |     |            |            |            |
|----|---|-----|------------|------------|------------|
| 15 | H | H13 | -2.7364164 | -5.5439176 | -1.3157681 |
| 16 | H | H14 | -2.1767881 | -4.8399854 | -2.8695951 |
| 17 | F | F1  | 1.5518602  | 1.4680768  | -2.2742731 |
| 18 | F | F2  | 2.9262425  | 1.4561124  | -0.5411711 |
| 19 | C | C4  | 0.7023730  | 2.3602625  | 1.2372566  |
| 20 | C | C5  | 1.8035834  | 2.9777018  | 1.7761645  |
| 21 | C | C6  | 1.5918459  | 3.4496041  | 3.1064879  |
| 22 | C | C7  | 0.3333226  | 3.1878326  | 3.5700286  |
| 23 | H | H1  | 2.7340315  | 3.0937873  | 1.2348702  |
| 24 | H | H8  | 2.3477142  | 3.9664063  | 3.6878268  |
| 25 | H | H9  | -0.0945008 | 3.4371092  | 4.5318277  |
| 26 | S | S1  | -0.6219377 | 2.3520552  | 2.3871829  |

## 2-thiophene TS2 (TS1da)

Spartan'10: G = -1173.261131, vi = i131, S<sup>2</sup> = 0.5683

Gaussian'09: B3LYP/6-31G\*, G = --1173.266174, vi = i334, S<sup>2</sup> = 0.58

Gaussian'09: M05-2X/6-31G\*, G = -1173.189048, vi = i147, S<sup>2</sup> = 0.76

Cartesian Coordinates (Angstroms)

| Atom     | X          | Y          | Z          |
|----------|------------|------------|------------|
| 1 C C    | -0.7210256 | -0.3769473 | -2.7513915 |
| 2 C C2   | -1.6633130 | -0.7878751 | -1.8574746 |
| 3 C C3   | -1.6425208 | -0.3469323 | -0.5084804 |
| 4 C C4   | 0.4568673  | 0.3730574  | -2.2301141 |
| 5 C C5   | 0.9604340  | -0.2059585 | -0.9352110 |
| 6 H H    | -0.7617934 | -0.5913906 | -3.8136378 |
| 7 H H7   | -2.4261631 | -1.5096041 | -2.1435472 |
| 8 H H8   | -1.2822483 | 0.6385526  | -0.2471795 |
| 9 H H12  | 0.7937751  | -1.2673813 | -0.8066724 |
| 10 F F1  | 1.4705438  | 0.3718068  | -3.1716569 |
| 11 F F2  | 0.1531733  | 1.7304276  | -2.0604202 |
| 12 C C11 | -2.3398484 | -1.1152447 | 0.5241681  |
| 13 O O1  | -2.9346804 | -2.1662237 | 0.3423726  |
| 14 O O2  | -2.2429288 | -0.5139217 | 1.7384721  |
| 15 C C12 | -2.8807106 | -1.2132354 | 2.8149511  |
| 16 H H1  | -3.9557208 | -1.3034663 | 2.6345635  |
| 17 H H9  | -2.6914657 | -0.6153949 | 3.7074120  |
| 18 H H10 | -2.4588123 | -2.2161999 | 2.9276998  |
| 19 C C1  | 1.9188089  | 0.4334481  | -0.1364692 |
| 20 C C6  | 2.3884821  | 1.7569630  | -0.1691832 |
| 21 C C7  | 3.3512113  | 2.0350217  | 0.8188765  |
| 22 C C8  | 3.6266421  | 0.9527961  | 1.6286792  |
| 23 H H3  | 2.0271893  | 2.4727681  | -0.8952321 |
| 24 H H5  | 3.8264599  | 3.0018556  | 0.9428367  |
| 25 H H11 | 4.3129625  | 0.9081502  | 2.4642703  |
| 26 S S1  | 2.7146815  | -0.4450712 | 1.1823680  |

## 2\_thiophene\_higher\_energyTS2 (TS1db)

G = -1173.26196

iv = i122

S<sup>2</sup> = 0.601

## Cartesian Coordinates (Angstroms)

| Atom     | X          | Y          | Z          |
|----------|------------|------------|------------|
| 1 C C    | -0.9278013 | 0.7602316  | -2.6901911 |
| 2 C C2   | -1.8672172 | 0.7618182  | -1.7032288 |
| 3 C C3   | -1.5086288 | 0.8413210  | -0.3336491 |
| 4 C C4   | 0.5043701  | 0.6104751  | -2.3065949 |
| 5 C C5   | 0.7012026  | -0.3701149 | -1.1866012 |
| 6 H H    | -1.1656141 | 0.8285247  | -3.7460605 |
| 7 H H7   | -2.9232110 | 0.6526694  | -1.9433104 |
| 8 H H8   | -0.6295369 | 1.3839016  | -0.0131775 |
| 9 H H12  | 0.0016210  | -1.1964024 | -1.1568814 |
| 10 F F1  | 1.2424323  | 0.2099791  | -3.4085654 |
| 11 F F2  | 1.0677132  | 1.8421132  | -1.9497644 |
| 12 C C11 | -2.4546584 | 0.4124461  | 0.6970248  |
| 13 O O1  | -3.5602301 | -0.0629061 | 0.4887400  |
| 14 O O2  | -1.9502468 | 0.6069819  | 1.9438422  |
| 15 C C12 | -2.8142156 | 0.2091798  | 3.0160398  |
| 16 H H1  | -3.7451809 | 0.7831206  | 2.9953433  |
| 17 H H9  | -2.2589454 | 0.4135549  | 3.9324871  |
| 18 H H10 | -3.0572818 | -0.8549834 | 2.9429923  |
| 19 C C1  | 1.8878436  | -0.5154771 | -0.4587369 |
| 20 C C6  | 2.2076707  | -1.5955701 | 0.3831959  |
| 21 C C7  | 3.4563134  | -1.4720247 | 1.0164381  |
| 22 C C8  | 4.1089268  | -0.3048071 | 0.6769360  |
| 23 H H3  | 1.5361313  | -2.4380247 | 0.5102434  |
| 24 H H5  | 3.8686245  | -2.2100946 | 1.6953957  |
| 25 H H11 | 5.0800204  | 0.0300601  | 1.0180010  |
| 26 S S1  | 3.1998985  | 0.6740277  | -0.4199186 |

## pyrrole\_N\_Boc - SM (9e)

G = -1176.15618

iv = none

## Cartesian Coordinates (Angstroms)

| Atom     | X          | Y          | Z          |
|----------|------------|------------|------------|
| 1 C C1   | 2.7535104  | 0.5329447  | -2.5439534 |
| 2 C C2   | 1.9022163  | 0.9879434  | -1.4270432 |
| 3 C C3   | 1.8744042  | -0.5181088 | -1.9545018 |
| 4 H H3   | 1.0240211  | 1.5436471  | -1.7384084 |
| 5 H H6   | 2.3889501  | -1.2127350 | -1.2950455 |
| 6 C C10  | 0.6922396  | -1.0140414 | -2.6636953 |
| 7 H H11  | 0.2033785  | -0.3375816 | -3.3618949 |
| 8 C C11  | 0.1738953  | -2.2418222 | -2.5067290 |
| 9 H H12  | 0.6086345  | -2.9725220 | -1.8307627 |
| 10 C C12 | -1.0270908 | -2.6493021 | -3.2620710 |
| 11 O O1  | -1.6401087 | -1.9646035 | -4.0590672 |
| 12 O O2  | -1.3777460 | -3.9235125 | -2.9510128 |
| 13 C C13 | -2.5355171 | -4.4200730 | -3.6359457 |
| 14 H H5  | -3.4124388 | -3.8079976 | -3.4065128 |
| 15 H H13 | -2.6754402 | -5.4400731 | -3.2758182 |
| 16 H H14 | -2.3762980 | -4.4132677 | -4.7179344 |

|    |   |     |            |            |            |
|----|---|-----|------------|------------|------------|
| 17 | F | F1  | 2.4675232  | 0.9968779  | -3.7830902 |
| 18 | F | F2  | 4.0957545  | 0.4116881  | -2.4057509 |
| 19 | C | C4  | 2.4334821  | 1.2902387  | -0.0860095 |
| 20 | C | C5  | 3.7232841  | 1.5276603  | 0.3230500  |
| 21 | C | C6  | 3.7171782  | 1.7451030  | 1.7362044  |
| 22 | C | C7  | 2.4272226  | 1.6350730  | 2.1677360  |
| 23 | H | H1  | 4.5820521  | 1.5408932  | -0.3309699 |
| 24 | H | H8  | 4.5748523  | 1.9620229  | 2.3583141  |
| 25 | H | H9  | 1.9875509  | 1.7354041  | 3.1455720  |
| 26 | N | N1  | 1.6202058  | 1.3551326  | 1.0643105  |
| 27 | C | C8  | 0.2226284  | 1.1991010  | 1.0943728  |
| 28 | O | O3  | -0.2133437 | 1.2468479  | 2.3591224  |
| 29 | C | C9  | -1.6575265 | 1.1251508  | 2.6728774  |
| 30 | C | C14 | -2.4290862 | 2.2782238  | 2.0251443  |
| 31 | H | H4  | -2.0009948 | 3.2405094  | 2.3261956  |
| 32 | H | H15 | -3.4707766 | 2.2507602  | 2.3630633  |
| 33 | H | H16 | -2.4136606 | 2.2073436  | 0.9367034  |
| 34 | C | C15 | -1.6721970 | 1.2482366  | 4.1979027  |
| 35 | H | H7  | -1.2663801 | 2.2142387  | 4.5152625  |
| 36 | H | H17 | -1.0770148 | 0.4526265  | 4.6573822  |
| 37 | H | H18 | -2.7006075 | 1.1669068  | 4.5639643  |
| 38 | C | C16 | -2.1679553 | -0.2495484 | 2.2317861  |
| 39 | H | H10 | -2.1369785 | -0.3572100 | 1.1464935  |
| 40 | H | H19 | -3.2033431 | -0.3743943 | 2.5670994  |
| 41 | H | H20 | -1.5664571 | -1.0443221 | 2.6862017  |
| 42 | O | O4  | -0.4520227 | 1.0465409  | 0.0974583  |

### pyyrole\_N\_boc\_TS2 (TS1e)

G = -1176.11077

iv = i75

S<sup>2</sup> = 0.7190

#### Cartesian Coordinates (Angstroms)

| Atom     | X          | Y          | Z          |
|----------|------------|------------|------------|
| 1 C C    | -2.2966442 | 2.5038283  | -0.7522378 |
| 2 C C2   | -3.2202595 | 1.5004654  | -0.6686955 |
| 3 C C3   | -2.8998157 | 0.1253002  | -0.6486436 |
| 4 C C4   | -0.8707789 | 2.2304137  | -1.0897300 |
| 5 C C5   | -0.6665939 | 1.0255474  | -1.9622623 |
| 6 H H    | -2.5642692 | 3.5472360  | -0.6166446 |
| 7 H H7   | -4.2782632 | 1.7570888  | -0.6453204 |
| 8 H H8   | -1.9495060 | -0.2386669 | -0.2794002 |
| 9 H H12  | -1.3323635 | 1.0127471  | -2.8182339 |
| 10 F F1  | -0.3734540 | 3.3374628  | -1.7833582 |
| 11 F F2  | -0.0802355 | 2.1913624  | 0.0547077  |
| 12 C C11 | -3.9457174 | -0.8595544 | -0.9329093 |
| 13 O O1  | -5.1044351 | -0.6039567 | -1.2244142 |
| 14 O O2  | -3.4698166 | -2.1283518 | -0.8295764 |
| 15 C C12 | -4.4254535 | -3.1600249 | -1.0993711 |
| 16 H H1  | -5.2735717 | -3.0933775 | -0.4117197 |
| 17 H H9  | -3.8909565 | -4.1003850 | -0.9574250 |
| 18 H H10 | -4.7998331 | -3.0837324 | -2.1247538 |
| 19 C C1  | 0.5248792  | 0.2999435  | -2.1256533 |

|    |   |     |           |            |            |
|----|---|-----|-----------|------------|------------|
| 20 | C | C6  | 1.0440565 | -0.2010755 | -3.3344732 |
| 21 | C | C7  | 2.3342710 | -0.7117037 | -3.0941433 |
| 22 | C | C8  | 2.5993629 | -0.5513321 | -1.7497834 |
| 23 | H | H3  | 0.5450331 | -0.1125159 | -4.2904793 |
| 24 | H | H5  | 3.0099156 | -1.1422242 | -3.8205963 |
| 25 | H | H11 | 3.4492929 | -0.8463660 | -1.1545859 |
| 26 | N | N1  | 1.5064027 | 0.0499485  | -1.1450145 |
| 27 | C | C9  | 1.2605679 | -0.0765626 | 0.2545129  |
| 28 | O | O3  | 2.3872856 | 0.1841217  | 0.9151857  |
| 29 | C | C10 | 2.4358210 | 0.1211324  | 2.3991176  |
| 30 | C | C13 | 1.4208616 | 1.1040404  | 2.9897361  |
| 31 | H | H13 | 1.5380529 | 2.0922187  | 2.5332578  |
| 32 | H | H14 | 0.3958318 | 0.7679561  | 2.8300664  |
| 33 | H | H15 | 1.5985712 | 1.1988611  | 4.0666651  |
| 34 | C | C14 | 3.8672117 | 0.5723141  | 2.6929274  |
| 35 | H | H4  | 4.0324401 | 1.5918928  | 2.3313039  |
| 36 | H | H16 | 4.5916532 | -0.0899223 | 2.2080669  |
| 37 | H | H17 | 4.0478971 | 0.5521972  | 3.7724520  |
| 38 | C | C15 | 2.2028363 | -1.3203461 | 2.8572202  |
| 39 | H | H6  | 1.1937030 | -1.6568408 | 2.6118931  |
| 40 | H | H18 | 2.9281275 | -1.9949784 | 2.3889698  |
| 41 | H | H19 | 2.3344957 | -1.3817917 | 3.9430077  |
| 42 | O | O4  | 0.1933966 | -0.4123696 | 0.7103349  |

### piperanal\_SM (9f)

Spartan'10: G = -1041.02196, iv = none

Gaussian'09: B3LYP/6-31G\*, G = -1041.030057, iv = none

Gaussian'09: M05-2X/6-31G\*, G = -1040.961182, iv = none

#### Cartesian Coordinates (Angstroms)

| Atom     | X          | Y          | Z          |
|----------|------------|------------|------------|
| 1 H H1   | 0.3173526  | 1.8117346  | -0.4860782 |
| 2 C C1   | 0.0796698  | 1.9703530  | 0.5619833  |
| 3 C C4   | -0.5139337 | 2.3341161  | 3.2187058  |
| 4 C C2   | 0.2084874  | 0.9017002  | 1.4568499  |
| 5 C C6   | -0.3484961 | 3.2417645  | 0.9790992  |
| 6 C C5   | -0.6383061 | 3.3915793  | 2.3211549  |
| 7 C C3   | -0.0958245 | 1.0796197  | 2.8250814  |
| 8 H H6   | -0.4515198 | 4.0668061  | 0.2827391  |
| 9 H H3   | -0.0162481 | 0.2654692  | 3.5352692  |
| 10 C C7  | 0.7180325  | -0.4153577 | 0.9594682  |
| 11 C C8  | 0.1449534  | -1.7162582 | 1.3582272  |
| 12 C C9  | -0.1583847 | -1.2780583 | -0.0372637 |
| 13 H H2  | 1.7827390  | -0.4632471 | 0.7318922  |
| 14 H H9  | -1.1646025 | -0.8901221 | -0.1771914 |
| 15 F F1  | -0.8678092 | -1.7730911 | 2.2531620  |
| 16 F F2  | 0.9806161  | -2.7644429 | 1.5466580  |
| 17 C C10 | 0.4727736  | -1.9279483 | -1.1918646 |
| 18 H H8  | 1.4598095  | -2.3639054 | -1.0472524 |
| 19 C C11 | -0.0808889 | -2.0200610 | -2.4103728 |
| 20 H H10 | -1.0656251 | -1.6194806 | -2.6329824 |
| 21 C C12 | 0.6434521  | -2.6904227 | -3.5104695 |
| 22 O O1  | 1.7572372  | -3.1745849 | -3.4406949 |

|    |   |     |            |            |            |
|----|---|-----|------------|------------|------------|
| 23 | O | O2  | -0.1053900 | -2.6999901 | -4.6407824 |
| 24 | C | C13 | 0.5090769  | -3.3295069 | -5.7742877 |
| 25 | H | H7  | -0.2243694 | -3.2656527 | -6.5788836 |
| 26 | H | H11 | 0.7479377  | -4.3733616 | -5.5532355 |
| 27 | H | H12 | 1.4297941  | -2.8084978 | -6.0514828 |
| 28 | O | O3  | -0.8886457 | 2.7475398  | 4.4747810  |
| 29 | C | C14 | -1.1176431 | 4.1571614  | 4.3678767  |
| 30 | H | H13 | -0.3195540 | 4.6995025  | 4.8933865  |
| 31 | H | H14 | -2.0979599 | 4.3997452  | 4.7885223  |
| 32 | O | O4  | -1.0967313 | 4.5068976  | 2.9779849  |

### piperanal\_TS2 (TS1f)

Spartan'10: G = -1040.98527, iv = i123, S<sup>2</sup> = 0.4875

Gaussian'09: B3LYP/6-31G\*, G = -1040.991312, iv = i123 S<sup>2</sup> = 0.49

Gaussian'09: M05-2X/6-31G\*, G = -1040.916448, iv = i154, S<sup>2</sup> = 0.70

#### Cartesian Coordinates (Angstroms)

| Atom     | X          | Y          | Z          |
|----------|------------|------------|------------|
| -----    | -----      | -----      | -----      |
| 1 C C    | -1.9415125 | 2.8459054  | -0.1145085 |
| 2 C C2   | -2.8968928 | 1.8980800  | 0.1045137  |
| 3 C C3   | -2.5560611 | 0.6313994  | 0.6442402  |
| 4 C C4   | -0.5213291 | 2.4249366  | 0.0232476  |
| 5 C C5   | -0.2785848 | 1.0938538  | -0.6265670 |
| 6 H H    | -2.1537181 | 3.8659395  | -0.4147181 |
| 7 H H7   | -3.9327982 | 2.0688843  | -0.1819285 |
| 8 H H8   | -1.7420745 | 0.5235062  | 1.3476045  |
| 9 H H12  | -0.9914780 | 0.8153500  | -1.3903371 |
| 10 F F1  | 0.3209903  | 3.3806811  | -0.5228531 |
| 11 F F2  | -0.1367627 | 2.3813647  | 1.3763306  |
| 12 C C1  | 0.9674345  | 0.4091213  | -0.6132428 |
| 13 C C6  | 3.3393187  | -1.0419376 | -0.7024803 |
| 14 C C7  | 1.1304562  | -0.7070957 | -1.4805967 |
| 15 C C8  | 2.0508659  | 0.7887275  | 0.2442712  |
| 16 C C9  | 3.2035145  | 0.0544406  | 0.1585045  |
| 17 C C10 | 2.3096788  | -1.4497963 | -1.5357170 |
| 18 H H2  | 0.3006140  | -0.9867083 | -2.1230616 |
| 19 H H6  | 1.9583437  | 1.6244971  | 0.9238368  |
| 20 H H3  | 2.4233575  | -2.3001809 | -2.1987607 |
| 21 C C11 | -3.4612854 | -0.5051960 | 0.4740267  |
| 22 O O1  | -4.5012178 | -0.4946765 | -0.1664901 |
| 23 O O2  | -3.0011475 | -1.6060197 | 1.1264093  |
| 24 C C12 | -3.8252873 | -2.7716733 | 1.0064332  |
| 25 H H1  | -4.8175953 | -2.5900216 | 1.4297484  |
| 26 H H9  | -3.3098968 | -3.5550517 | 1.5638819  |
| 27 H H10 | -3.9401814 | -3.0590914 | -0.0429790 |
| 28 C C16 | 5.2862127  | -0.7515467 | 0.3636972  |
| 29 H H16 | 5.6638544  | -1.3654739 | 1.1871797  |
| 30 H H17 | 6.1072607  | -0.2495450 | -0.1631722 |
| 31 O O3  | 4.5775514  | -1.5919137 | -0.5642076 |
| 32 O O4  | 4.3683699  | 0.2192409  | 0.8676951  |

## Vinyl\_SM (9g)

G = -698.896923

iv = none

Cartesian Coordinates (Angstroms)

| Atom     | X          | Y          | Z          |
|----------|------------|------------|------------|
| 1 C C1   | 1.9355502  | 1.7969259  | -0.3459348 |
| 2 C C2   | 0.8307819  | 2.1575483  | 0.5704414  |
| 3 C C3   | 1.1920029  | 0.6392453  | 0.2183687  |
| 4 H H3   | -0.0759566 | 2.5122382  | 0.0862674  |
| 5 H H6   | 1.6963533  | 0.1125771  | 1.0252585  |
| 6 C C10  | 0.2552858  | -0.1365557 | -0.6009850 |
| 7 H H11  | -0.1543285 | 0.3425355  | -1.4885605 |
| 8 C C11  | -0.1335964 | -1.3913708 | -0.3282800 |
| 9 H H12  | 0.2329983  | -1.9394131 | 0.5347714  |
| 10 C C12 | -1.0945064 | -2.0825309 | -1.2131158 |
| 11 O O1  | -1.5953320 | -1.6208579 | -2.2209946 |
| 12 O O2  | -1.3607729 | -3.3286259 | -0.7502454 |
| 13 C C13 | -2.2872051 | -4.0875934 | -1.5403591 |
| 14 H H5  | -3.2430000 | -3.5630588 | -1.6222382 |
| 15 H H13 | -2.4121995 | -5.0357462 | -1.0162391 |
| 16 H H14 | -1.8896012 | -4.2541816 | -2.5455875 |
| 17 F F1  | 1.8126274  | 2.0764637  | -1.6634147 |
| 18 F F2  | 3.2135469  | 1.9930861  | 0.0537993  |
| 19 C C4  | 1.0896415  | 2.6534012  | 1.9367450  |
| 20 H H2  | 2.0583814  | 2.3967857  | 2.3621727  |
| 21 C C5  | 0.2219098  | 3.3789314  | 2.6464829  |
| 22 H H1  | 0.4602017  | 3.7221319  | 3.6487135  |
| 23 H H4  | -0.7527828 | 3.6580640  | 2.2529337  |

## Vinyl\_TS2 LHS (TS1g)

G = -698.857875

iv = i198

S<sup>2</sup> = 0.6714

Cartesian Coordinates (Angstroms)

| Atom     | X          | Y          | Z          |
|----------|------------|------------|------------|
| 1 C C    | 0.1652595  | 2.6452115  | -0.3143155 |
| 2 C C2   | -0.9584813 | 1.8809569  | -0.3019228 |
| 3 C C3   | -0.9637138 | 0.5905294  | 0.2988038  |
| 4 C C4   | 1.4504042  | 2.0089192  | 0.1090996  |
| 5 C C5   | 1.5736222  | 0.5798217  | -0.3410965 |
| 6 H H    | 0.1907607  | 3.6766667  | -0.6489816 |
| 7 H H7   | -1.8694255 | 2.2159214  | -0.7940528 |
| 8 H H8   | -0.3786445 | 0.3846912  | 1.1849748  |
| 9 H H12  | 1.1669910  | 0.3487995  | -1.3194338 |
| 10 F F1  | 2.5134097  | 2.7425610  | -0.3921617 |
| 11 F F2  | 1.6046460  | 2.0673940  | 1.4925765  |
| 12 C C11 | -1.9729073 | -0.3973458 | -0.0922705 |
| 13 O O1  | -2.8112126 | -0.2389039 | -0.9652907 |



|    |   |     |            |            |            |
|----|---|-----|------------|------------|------------|
| 14 | O | O2  | -1.8623287 | -1.5331343 | 0.6422082  |
| 15 | C | C12 | -2.8063532 | -2.5626474 | 0.3167219  |
| 16 | H | H1  | -3.8302743 | -2.2111786 | 0.4741522  |
| 17 | H | H9  | -2.5784639 | -3.3924022 | 0.9872065  |
| 18 | H | H10 | -2.6972065 | -2.8709552 | -0.7274202 |
| 19 | C | C1  | 2.4851927  | -0.3044672 | 0.2691289  |
| 20 | H | H3  | 2.9377797  | 0.0188533  | 1.2042950  |
| 21 | C | C6  | 2.7966479  | -1.5403617 | -0.2250625 |
| 22 | H | H2  | 3.4848028  | -2.2007601 | 0.2926869  |
| 23 | H | H4  | 2.3594953  | -1.9081690 | -1.1498455 |

### 3-thiophene\_SM (9h)

G = -1173.29649

iv = none

Cartesian Coordinates (Angstroms)

|       | Atom | X   | Y          | Z          |            |
|-------|------|-----|------------|------------|------------|
| ----- |      |     |            |            |            |
| 1     | C    | C1  | 1.4442820  | 1.5404046  | -1.0097879 |
| 2     | C    | C2  | 0.3927582  | 1.8764466  | -0.0237970 |
| 3     | C    | C3  | 0.8288766  | 0.3719452  | -0.3204143 |
| 4     | H    | H3  | -0.5607177 | 2.1328018  | -0.4786628 |
| 5     | H    | H6  | 1.4362987  | -0.0670530 | 0.4676500  |
| 6     | C    | C10 | -0.1107572 | -0.5159186 | -1.0134407 |
| 7     | H    | H11 | -0.6603421 | -0.1039428 | -1.8581155 |
| 8     | C    | C11 | -0.3435135 | -1.7926382 | -0.6731372 |
| 9     | H    | H12 | 0.1711044  | -2.2773250 | 0.1516008  |
| 10    | C    | C12 | -1.3258436 | -2.5989270 | -1.4276396 |
| 11    | O    | O1  | -1.9984877 | -2.2113527 | -2.3641198 |
| 12    | O    | O2  | -1.3897156 | -3.8597859 | -0.9339553 |
| 13    | C    | C13 | -2.3181495 | -4.7285856 | -1.5989953 |
| 14    | H    | H5  | -3.3350508 | -4.3325827 | -1.5279792 |
| 15    | H    | H13 | -2.2432837 | -5.6872218 | -1.0845376 |
| 16    | H    | H14 | -2.0553539 | -4.8368853 | -2.6549552 |
| 17    | F    | F1  | 1.1825558  | 1.7359006  | -2.3226269 |
| 18    | F    | F2  | 2.7405856  | 1.8349551  | -0.7532548 |
| 19    | C    | C4  | 0.6386102  | 2.4940989  | 1.3012228  |
| 20    | C    | C5  | 1.8650771  | 2.4391855  | 2.0495963  |
| 21    | C    | C6  | 1.7847172  | 3.0813387  | 3.2512183  |
| 22    | S    | S1  | 0.2168841  | 3.7791875  | 3.5053528  |
| 23    | C    | C8  | -0.3357356 | 3.1901481  | 1.9737064  |
| 24    | H    | H1  | 2.7672056  | 1.9564327  | 1.6953535  |
| 25    | H    | H8  | 2.5584428  | 3.1962145  | 3.9983072  |
| 26    | H    | H15 | -1.3504474 | 3.3831587  | 1.6514110  |

### 2-thiophene TS2 alt (TS1h)

G = -1173.25727

iv = i114

S<sup>2</sup> = 0.5844

Cartesian Coordinates (Angstroms)

|       | Atom | X | Y | Z |
|-------|------|---|---|---|
| ----- |      |   |   |   |

|    |   |     |            |            |            |
|----|---|-----|------------|------------|------------|
| 1  | C | C   | -0.3331252 | 2.7439182  | -0.5242953 |
| 2  | C | C2  | -1.4517833 | 1.9650401  | -0.5727216 |
| 3  | C | C3  | -1.5103739 | 0.7180630  | 0.0976444  |
| 4  | C | C4  | 0.9029740  | 2.1508129  | 0.0594263  |
| 5  | C | C5  | 1.1146943  | 0.7374396  | -0.3968356 |
| 6  | H | H   | -0.2825728 | 3.7530236  | -0.9182330 |
| 7  | H | H7  | -2.3112866 | 2.2592107  | -1.1717697 |
| 8  | H | H8  | -0.9585452 | 0.5456332  | 1.0118178  |
| 9  | H | H12 | 0.6711376  | 0.4815216  | -1.3498593 |
| 10 | F | F1  | 2.0021802  | 2.9255137  | -0.2725910 |
| 11 | F | F2  | 0.8715525  | 2.1990947  | 1.4621430  |
| 12 | C | C11 | -2.5122966 | -0.2777141 | -0.2889431 |
| 13 | O | O1  | -3.3033639 | -0.1635621 | -1.2119161 |
| 14 | O | O2  | -2.4575935 | -1.3702203 | 0.5160657  |
| 15 | C | C12 | -3.3994409 | -2.4043657 | 0.2026418  |
| 16 | H | H1  | -4.4248487 | -2.0408846 | 0.3169501  |
| 17 | H | H9  | -3.1984520 | -3.2090659 | 0.9108671  |
| 18 | H | H10 | -3.2635384 | -2.7531014 | -0.8251504 |
| 19 | C | C1  | 2.1319687  | -0.1093191 | 0.1123631  |
| 20 | C | C6  | 2.5032706  | -1.3622827 | -0.5148334 |
| 21 | C | C7  | 3.4928028  | -2.0212654 | 0.1397115  |
| 22 | S | S1  | 4.0211354  | -1.1473099 | 1.5576573  |
| 23 | C | C9  | 2.8912283  | 0.1141277  | 1.2640703  |
| 24 | H | H3  | 2.0309517  | -1.7285710 | -1.4201138 |
| 25 | H | H5  | 3.9542148  | -2.9658622 | -0.1152083 |
| 26 | H | H14 | 2.8191103  | 0.9601255  | 1.9311122  |

## 2-thiazole SM (9i)

G = -1189.35451

iv = none

### Cartesian Coordinates (Angstroms)

| Atom     | X          | Y          | Z          |
|----------|------------|------------|------------|
| 1 C C1   | 1.4013058  | 1.6826903  | -0.9862793 |
| 2 C C2   | 0.3481207  | 1.9349898  | 0.0400251  |
| 3 C C3   | 0.8159698  | 0.4777131  | -0.3397660 |
| 4 H H6   | 1.4365614  | 0.0346426  | 0.4351354  |
| 5 C C10  | -0.1119487 | -0.4004681 | -1.0663144 |
| 6 H H11  | -0.6646054 | 0.0283623  | -1.9004368 |
| 7 C C11  | -0.3216483 | -1.6902861 | -0.7672656 |
| 8 H H12  | 0.1965106  | -2.1904600 | 0.0457575  |
| 9 C C12  | -1.2854305 | -2.4901029 | -1.5544828 |
| 10 O O1  | -1.9512959 | -2.0857909 | -2.4883978 |
| 11 O O2  | -1.3389844 | -3.7630262 | -1.0940432 |
| 12 C C13 | -2.2476632 | -4.6264585 | -1.7931289 |
| 13 H H5  | -3.2687791 | -4.2396457 | -1.7340227 |
| 14 H H13 | -2.1742931 | -5.5940744 | -1.2957037 |
| 15 H H14 | -1.9635389 | -4.7121801 | -2.8456385 |
| 16 F F1  | 1.0897515  | 1.9454442  | -2.2761353 |
| 17 F F2  | 2.6798604  | 2.0163755  | -0.7391868 |
| 18 C C4  | 0.6871187  | 2.4484393  | 1.3825995  |
| 19 N N1  | 1.5569002  | 1.9082761  | 2.1889631  |

|    |   |    |            |           |            |
|----|---|----|------------|-----------|------------|
| 20 | C | C7 | 0.9016926  | 3.7544921 | 3.4403495  |
| 21 | H | H9 | 0.8278894  | 4.4632764 | 4.2532685  |
| 22 | S | S1 | -0.0542307 | 3.9215840 | 2.0031029  |
| 23 | H | H3 | -0.6141778 | 2.2362664 | -0.3652607 |
| 24 | C | C6 | 1.6824389  | 2.6395753 | 3.3463609  |
| 25 | H | H7 | 2.3724759  | 2.3003654 | 4.1105000  |

### 2-thiazole TS2 (TS1ia)

G = -1189.31604

iv = i158

S<sup>2</sup> = 0.6401

Cartesian Coordinates (Angstroms)

|       | Atom  | X          | Y          | Z          |
|-------|-------|------------|------------|------------|
| ----- |       | -----      | -----      | -----      |
| 1     | C C   | -0.8624600 | 0.6458233  | -2.6809721 |
| 2     | C C2  | -1.7945142 | 0.6484678  | -1.6885283 |
| 3     | C C3  | -1.4196477 | 0.7346465  | -0.3224604 |
| 4     | C C4  | 0.5731559  | 0.5015687  | -2.2988314 |
| 5     | C C5  | 0.7688284  | -0.4679819 | -1.1699536 |
| 6     | H H   | -1.1050971 | 0.7031453  | -3.7364239 |
| 7     | H H7  | -2.8520204 | 0.5322726  | -1.9168489 |
| 8     | H H8  | -0.5487926 | 1.2963848  | -0.0125430 |
| 9     | H H12 | 0.1063398  | -1.3231256 | -1.1382335 |
| 10    | F F1  | 1.3102300  | 0.0940487  | -3.3953137 |
| 11    | F F2  | 1.1248412  | 1.7403949  | -1.9531783 |
| 12    | C C11 | -2.3513200 | 0.2959998  | 0.7223360  |
| 13    | O O1  | -3.4476576 | -0.2001740 | 0.5203581  |
| 14    | O O2  | -1.8421206 | 0.5130008  | 1.9592936  |
| 15    | C C12 | -2.6828069 | 0.0961690  | 3.0445494  |
| 16    | H H1  | -3.6349998 | 0.6336831  | 3.0225873  |
| 17    | H H9  | -2.1283804 | 0.3339141  | 3.9529242  |
| 18    | H H10 | -2.8823985 | -0.9775536 | 2.9854094  |
| 19    | C C1  | 1.9504425  | -0.5849422 | -0.4186831 |
| 20    | N N1  | 2.1984549  | -1.6348782 | 0.3707388  |
| 21    | C C8  | 4.1034809  | -0.3580502 | 0.7303876  |
| 22    | H H11 | 5.0684951  | -0.0693435 | 1.1245010  |
| 23    | S S1  | 3.2435322  | 0.6444020  | -0.3730350 |
| 24    | C C7  | 3.3860264  | -1.5066663 | 1.0000569  |
| 25    | H H4  | 3.7183885  | -2.2912055 | 1.6718630  |

### thiazole\_higher\_energyTS2 (TS1ib)

G = -1189.31128

iv = i172

S<sup>2</sup> = 0.6211

Cartesian Coordinates (Angstroms)

|       | Atom | X          | Y         | Z          |
|-------|------|------------|-----------|------------|
| ----- |      | -----      | -----     | -----      |
| 1     | C C  | -0.9124198 | 0.5660171 | -2.6688343 |
| 2     | C C2 | -1.8409100 | 0.5476441 | -1.6746237 |
| 3     | C C3 | -1.4526669 | 0.6770132 | -0.3132767 |

|    |   |     |            |            |            |
|----|---|-----|------------|------------|------------|
| 4  | C | C4  | 0.5318908  | 0.5151246  | -2.2727045 |
| 5  | C | C5  | 0.7450768  | -0.4716982 | -1.1503779 |
| 6  | H | H   | -1.1557524 | 0.5780877  | -3.7256670 |
| 7  | H | H7  | -2.8933373 | 0.3752347  | -1.8897007 |
| 8  | H | H8  | -0.6112304 | 1.2936434  | -0.0270815 |
| 9  | H | H12 | 0.0711162  | -1.3178375 | -1.1388929 |
| 10 | F | F1  | 1.2984462  | 0.1460785  | -3.3609117 |
| 11 | F | F2  | 0.9821656  | 1.7714234  | -1.9150056 |
| 12 | C | C11 | -2.3479460 | 0.2107881  | 0.7509096  |
| 13 | O | O1  | -3.4172720 | -0.3501472 | 0.5736335  |
| 14 | O | O2  | -1.8381305 | 0.4805843  | 1.9781156  |
| 15 | C | C12 | -2.6495697 | 0.0533101  | 3.0811159  |
| 16 | H | H1  | -3.6204748 | 0.5563684  | 3.0622352  |
| 17 | H | H9  | -2.0932806 | 0.3274638  | 3.9780292  |
| 18 | H | H10 | -2.8124816 | -1.0275786 | 3.0439963  |
| 19 | C | C1  | 1.9449539  | -0.5742326 | -0.4236465 |
| 20 | N | N1  | 2.9420037  | 0.3050315  | -0.3933605 |
| 21 | C | C8  | 3.7444018  | -1.3024687 | 1.0843730  |
| 22 | H | H11 | 4.4074900  | -1.7902521 | 1.7856196  |
| 23 | S | S1  | 2.2310906  | -1.9904853 | 0.6387774  |
| 24 | C | C7  | 3.9330111  | -0.1008447 | 0.4304792  |
| 25 | H | H4  | 4.8138256  | 0.5217320  | 0.5467991  |

### Ph LHS SM (control compound) (9j)

Spartan'10: G = -852.507737, iv = none

Gaussian'09: B3LYP/6-31G\*, G = -852.513911, iv = none

Gaussian'09: M05-2X/6-31G\*, G = -852.454583, iv = none

Cartesian Coordinates (Angstroms)

|    | Atom  | X          | Y          | Z          |
|----|-------|------------|------------|------------|
| 1  | H H1  | -0.7342992 | 2.1292350  | -0.6038797 |
| 2  | C C1  | -0.6896550 | 2.5456381  | 0.3996721  |
| 3  | C C4  | -0.5788215 | 3.6046272  | 2.9736287  |
| 4  | C C2  | 0.1528229  | 1.9539030  | 1.3524642  |
| 5  | C C6  | -1.4665871 | 3.6544153  | 0.7292205  |
| 6  | C C5  | -1.4135141 | 4.1868572  | 2.0197807  |
| 7  | C C3  | 0.2019187  | 2.4950669  | 2.6438137  |
| 8  | H H6  | -2.1142921 | 4.1021150  | -0.0198156 |
| 9  | H H5  | -2.0191435 | 5.0512131  | 2.2786045  |
| 10 | H H3  | 0.8466623  | 2.0454541  | 3.3913082  |
| 11 | H H4  | -0.5318796 | 4.0135924  | 3.9793780  |
| 12 | C C7  | 1.0044769  | 0.7904903  | 0.9510633  |
| 13 | C C8  | 1.3092637  | -0.3611739 | 1.8231770  |
| 14 | C C9  | 0.3451828  | -0.6317107 | 0.7160262  |
| 15 | H H9  | -0.6950119 | -0.6814867 | 1.0296629  |
| 16 | F F1  | 0.8550859  | -0.4026367 | 3.0973066  |
| 17 | F F2  | 2.5471373  | -0.9057421 | 1.7618348  |
| 18 | C C10 | 0.7256057  | -1.4333489 | -0.4525928 |
| 19 | H H8  | 1.7776668  | -1.4516307 | -0.7317858 |
| 20 | C C11 | -0.1366627 | -2.1405728 | -1.1983779 |
| 21 | H H10 | -1.1996782 | -2.1775237 | -0.9780074 |
| 22 | C C12 | 0.3401656  | -2.9115132 | -2.3652549 |
| 23 | O O1  | 1.4898785  | -2.9767628 | -2.7568938 |

|    |   |     |            |            |            |
|----|---|-----|------------|------------|------------|
| 24 | O | O2  | -0.6913356 | -3.5547476 | -2.9657551 |
| 25 | C | C13 | -0.3365797 | -4.3399461 | -4.1129601 |
| 26 | H | H7  | 0.3705291  | -5.1270044 | -3.8365732 |
| 27 | H | H11 | 0.1186948  | -3.7122448 | -4.8840365 |
| 28 | H | H12 | -1.2707537 | -4.7727264 | -4.4725849 |
| 29 | H | H2  | 1.7931229  | 1.0081637  | 0.2315763  |

### Ph\_LHS\_TS2 (TS1j)

Spartan'10: G = -852.467491, iv = i124, S<sup>2</sup> = 0.5609

Gaussian'09: B3LYP/6-31G\*, G = -852.471539, iv = i139, S<sup>2</sup> = 0.72

Gaussian'09: M05-2X/6-31G\*, G = -852.407064, iv = i150 S<sup>2</sup> = 0.73

Cartesian Coordinates (Angstroms)

|    | Atom  | X          | Y          | Z          |
|----|-------|------------|------------|------------|
| 1  | C C   | -0.7938224 | 2.9281295  | -0.4973567 |
| 2  | C C2  | -1.9169588 | 2.1548519  | -0.5208385 |
| 3  | C C3  | -1.9447433 | 0.8899069  | 0.1188859  |
| 4  | C C4  | 0.4554569  | 2.3058113  | 0.0257641  |
| 5  | C C5  | 0.6396500  | 0.9126099  | -0.5034969 |
| 6  | H H   | -0.7489920 | 3.9452945  | -0.8705278 |
| 7  | H H7  | -2.7990824 | 2.4628835  | -1.0784486 |
| 8  | H H8  | -1.3634344 | 0.6999835  | 1.0109197  |
| 9  | H H12 | 0.1318702  | 0.7046588  | -1.4362973 |
| 10 | F F1  | 1.5526349  | 3.0842611  | -0.3012959 |
| 11 | F F2  | 0.4548498  | 2.2993475  | 1.4302410  |
| 12 | C C1  | 1.6981159  | 0.0337646  | -0.1244960 |
| 13 | C C6  | 3.7528699  | -1.7843479 | 0.5356695  |
| 14 | C C7  | 1.9221078  | -1.1367612 | -0.8981062 |
| 15 | C C8  | 2.5370955  | 0.2579721  | 1.0002180  |
| 16 | C C9  | 3.5497938  | -0.6376134 | 1.3129267  |
| 17 | C C10 | 2.9311417  | -2.0302287 | -0.5711578 |
| 18 | H H2  | 1.2868288  | -1.3240531 | -1.7604162 |
| 19 | H H6  | 2.3799547  | 1.1370129  | 1.6122318  |
| 20 | H H5  | 4.1864329  | -0.4470045 | 2.1726196  |
| 21 | H H3  | 3.0852933  | -2.9185318 | -1.1775979 |
| 22 | H H4  | 4.5447429  | -2.4828045 | 0.7915831  |
| 23 | C C11 | -2.9550719 | -0.1019472 | -0.2577349 |
| 24 | O O1  | -3.7794569 | 0.0322524  | -1.1481949 |
| 25 | O O2  | -2.8655294 | -1.2148241 | 0.5148987  |
| 26 | C C12 | -3.8127241 | -2.2457971 | 0.2059573  |
| 27 | H H1  | -4.8355106 | -1.8867747 | 0.3524122  |
| 28 | H H9  | -3.5920855 | -3.0635919 | 0.8932747  |
| 29 | H H10 | -3.7014272 | -2.5744602 | -0.8316365 |

### bis\_Ph\_SM (9k)

G = -1083.47906

iv = none

Cartesian Coordinates (Angstroms)

|  | Atom | X | Y | Z |
|--|------|---|---|---|
|--|------|---|---|---|

|    |   |     |            |            |            |
|----|---|-----|------------|------------|------------|
| 1  | C | C1  | 2.1401892  | -0.0956954 | -0.5030615 |
| 2  | C | C2  | 1.0084305  | 0.6541421  | 0.1013241  |
| 3  | C | C3  | 1.0969993  | -0.9312616 | 0.1653649  |
| 4  | H | H6  | 1.3824353  | -1.3078350 | 1.1445602  |
| 5  | C | C4  | 1.2610998  | 1.3842374  | 1.3998916  |
| 6  | C | C5  | 1.6621778  | 2.8368121  | 3.7687618  |
| 7  | C | C6  | 0.5771414  | 1.0383205  | 2.5708181  |
| 8  | C | C7  | 2.1514488  | 2.4655458  | 1.4290384  |
| 9  | C | C8  | 2.3510230  | 3.1865204  | 2.6055784  |
| 10 | C | C9  | 0.7744797  | 1.7603828  | 3.7486637  |
| 11 | H | H4  | -0.1128299 | 0.1982990  | 2.5605250  |
| 12 | H | H7  | 2.6904649  | 2.7407226  | 0.5268287  |
| 13 | H | H8  | 3.0475027  | 4.0206999  | 2.6144128  |
| 14 | H | H9  | 0.2348075  | 1.4804399  | 4.6494368  |
| 15 | C | C10 | 0.1997949  | -1.7833133 | -0.6270916 |
| 16 | H | H11 | -0.0529765 | -1.4603042 | -1.6341065 |
| 17 | C | C11 | -0.3192736 | -2.9411307 | -0.1905993 |
| 18 | H | H12 | -0.1109823 | -3.3375552 | 0.7992122  |
| 19 | C | C12 | -1.2026816 | -3.7385484 | -1.0670984 |
| 20 | O | O1  | -1.5445314 | -3.4423954 | -2.1960226 |
| 21 | O | O2  | -1.5992964 | -4.8756654 | -0.4422651 |
| 22 | C | C13 | -2.4590919 | -5.7243013 | -1.2159658 |
| 23 | H | H5  | -3.3938217 | -5.2092327 | -1.4552872 |
| 24 | H | H13 | -2.6519025 | -6.5966411 | -0.5904149 |
| 25 | H | H14 | -1.9711465 | -6.0186838 | -2.1489851 |
| 26 | F | F1  | 2.2560587  | -0.1617158 | -1.8507333 |
| 27 | F | F2  | 3.3716170  | -0.0205447 | 0.0501528  |
| 28 | H | H16 | 1.8186444  | 3.3988195  | 4.6855521  |
| 29 | C | C14 | -0.0221504 | 1.2954522  | -0.7972292 |
| 30 | C | C15 | -1.9532314 | 2.5840539  | -2.3773674 |
| 31 | C | C16 | -1.3881705 | 1.1209839  | -0.5374988 |
| 32 | C | C17 | 0.3650011  | 2.1252734  | -1.8574405 |
| 33 | C | C18 | -0.5955412 | 2.7651048  | -2.6420020 |
| 34 | C | C19 | -2.3475632 | 1.7589318  | -1.3221684 |
| 35 | H | H2  | -1.7000848 | 0.4771947  | 0.2803560  |
| 36 | H | H1  | 1.4189827  | 2.2629083  | -2.0781994 |
| 37 | H | H3  | -0.2800252 | 3.4018179  | -3.4642146 |
| 38 | H | H10 | -3.4028383 | 1.6083512  | -1.1113529 |
| 39 | H | H15 | -2.7001597 | 3.0798098  | -2.9913732 |

### bis\_Ph\_TS2 (TS1k)

G = -1083.43796

iv = i170

S<sup>2</sup> = 0.5387

#### Cartesian Coordinates (Angstroms)

|   | Atom | X  | Y          | Z         |           |
|---|------|----|------------|-----------|-----------|
| 1 | C    | C  | -0.4905029 | 2.9644064 | 0.2699805 |
| 2 | C    | C2 | -1.6739456 | 2.3000484 | 0.1811172 |
| 3 | C    | C3 | -1.8234284 | 0.9930522 | 0.7115034 |
| 4 | C    | C4 | 0.7007691  | 2.2204344 | 0.7848070 |
| 5 | C    | C5 | 0.8020209  | 0.7758907 | 0.2922367 |
| 6 | H    | H  | -0.3628539 | 4.0113164 | 0.0158601 |

|    |   |     |            |            |            |
|----|---|-----|------------|------------|------------|
| 7  | H | H7  | -2.5148493 | 2.7325649  | -0.3574474 |
| 8  | H | H8  | -1.3254011 | 0.6920489  | 1.6207777  |
| 9  | F | F1  | 1.8636038  | 2.8958172  | 0.4238450  |
| 10 | F | F2  | 0.7094526  | 2.2676910  | 2.1728991  |
| 11 | C | C1  | 1.4274022  | -0.2471139 | 1.1415429  |
| 12 | C | C6  | 2.6632180  | -2.2619875 | 2.7066499  |
| 13 | C | C7  | 2.3919579  | -1.1262335 | 0.5910474  |
| 14 | C | C8  | 1.1150697  | -0.4092438 | 2.5134199  |
| 15 | C | C9  | 1.7196106  | -1.4031744 | 3.2752391  |
| 16 | C | C10 | 2.9998396  | -2.1130276 | 1.3598395  |
| 17 | H | H2  | 2.6831985  | -1.0061205 | -0.4461451 |
| 18 | H | H6  | 0.3847455  | 0.2361774  | 2.9804870  |
| 19 | H | H5  | 1.4477300  | -1.5099628 | 4.3216431  |
| 20 | H | H3  | 3.7451214  | -2.7611627 | 0.9068595  |
| 21 | H | H4  | 3.1324323  | -3.0357165 | 3.3080647  |
| 22 | C | C11 | -2.8669953 | 0.1051841  | 0.2041829  |
| 23 | O | O1  | -3.6526536 | 0.3696869  | -0.6919707 |
| 24 | O | O2  | -2.8577312 | -1.0884394 | 0.8590324  |
| 25 | C | C12 | -3.8453877 | -2.0292641 | 0.4217172  |
| 26 | H | H1  | -4.8524776 | -1.6265121 | 0.5631762  |
| 27 | H | H9  | -3.6987149 | -2.9175849 | 1.0380379  |
| 28 | H | H10 | -3.7106018 | -2.2706167 | -0.6369425 |
| 29 | C | C13 | 0.7059762  | 0.5609448  | -1.1515914 |
| 30 | C | C14 | 0.4088753  | 0.1093913  | -3.9293928 |
| 31 | C | C15 | 0.9236744  | 1.5965010  | -2.0893611 |
| 32 | C | C16 | 0.3436510  | -0.7135608 | -1.6564080 |
| 33 | C | C17 | 0.1940066  | -0.9325095 | -3.0176990 |
| 34 | C | C18 | 0.7744233  | 1.3681896  | -3.4571869 |
| 35 | H | H11 | 1.2584263  | 2.5672437  | -1.7492165 |
| 36 | H | H12 | 0.1380548  | -1.5165279 | -0.9558351 |
| 37 | H | H13 | -0.1056006 | -1.9144923 | -3.3740211 |
| 38 | H | H14 | 0.9565966  | 2.1808425  | -4.1552514 |
| 39 | H | H15 | 0.2912871  | -0.0641812 | -4.9954973 |

### alkynyl\_LHS\_SM (9I)

G = -697.662199

iv = none

#### Cartesian Coordinates (Angstroms)

|    | Atom | X   | Y          | Z          |            |
|----|------|-----|------------|------------|------------|
| 1  | C    | C1  | 2.0424676  | 1.9684931  | -0.1391170 |
| 2  | C    | C2  | 0.8725035  | 2.4962424  | 0.6162951  |
| 3  | C    | C3  | 1.1493632  | 0.9340715  | 0.4498497  |
| 4  | H    | H3  | 0.0609649  | 2.8669018  | -0.0070648 |
| 5  | H    | H6  | 1.5244582  | 0.4683830  | 1.3570881  |
| 6  | C    | C10 | 0.2426017  | 0.1419043  | -0.3899421 |
| 7  | H    | H11 | -0.0646980 | 0.5667251  | -1.3437475 |
| 8  | C    | C11 | -0.2303187 | -1.0678896 | -0.0571690 |
| 9  | H    | H12 | 0.0360504  | -1.5606142 | 0.8732704  |
| 10 | C    | C12 | -1.1469251 | -1.7848967 | -0.9704422 |
| 11 | O    | O1  | -1.5497743 | -1.3718325 | -2.0409954 |
| 12 | O    | O2  | -1.4935214 | -2.9877721 | -0.4535502 |
| 13 | C    | C13 | -2.3834903 | -3.7677120 | -1.2660675 |

|    |   |     |            |            |            |
|----|---|-----|------------|------------|------------|
| 14 | H | H5  | -3.3175284 | -3.2268389 | -1.4405158 |
| 15 | H | H13 | -2.5682923 | -4.6831435 | -0.7031171 |
| 16 | H | H14 | -1.9222194 | -3.9957741 | -2.2309570 |
| 17 | F | F1  | 2.0512871  | 2.1302983  | -1.4803672 |
| 18 | F | F2  | 3.2825906  | 2.1200466  | 0.3600670  |
| 19 | C | C4  | 1.0217110  | 3.0973457  | 1.9084994  |
| 20 | H | H1  | 1.2541083  | 4.0534359  | 3.9587574  |
| 21 | C | C5  | 1.1386614  | 3.6026259  | 2.9992259  |

### alkynyl\_LHS\_TS2 (TS1I)

G = -697.620962

iv = i184

S<sup>2</sup> = 0.6758

Cartesian Coordinates (Angstroms)

|    | Atom  | X          | Y          | Z          |
|----|-------|------------|------------|------------|
| 1  | C C   | 0.4165731  | 2.5068791  | -0.3637114 |
| 2  | C C2  | -0.6902111 | 1.7284846  | -0.5113690 |
| 3  | C C3  | -0.7689538 | 0.4441358  | 0.0901598  |
| 4  | C C4  | 1.6325214  | 1.8895419  | 0.2525525  |
| 5  | C C5  | 1.8367364  | 0.4685151  | -0.2135836 |
| 6  | H H   | 0.4814311  | 3.5345224  | -0.7045805 |
| 7  | H H7  | -1.5231515 | 2.0493445  | -1.1332736 |
| 8  | H H8  | -0.2830066 | 0.2352376  | 1.0335260  |
| 9  | H H12 | 1.5620280  | 0.2510525  | -1.2394046 |
| 10 | F F1  | 2.7448939  | 2.6456606  | -0.0628903 |
| 11 | F F2  | 1.5608009  | 1.9131080  | 1.6360459  |
| 12 | C C11 | -1.7408621 | -0.5420694 | -0.3985955 |
| 13 | O O1  | -2.5033990 | -0.3717384 | -1.3355925 |
| 14 | O O2  | -1.6893955 | -1.6811234 | 0.3336227  |
| 15 | C C12 | -2.6113098 | -2.7077900 | -0.0591668 |
| 16 | H H1  | -3.6404973 | -2.3981585 | 0.1488279  |
| 17 | H H9  | -2.3494573 | -3.5814320 | 0.5392686  |
| 18 | H H10 | -2.5162890 | -2.9258022 | -1.1264765 |
| 19 | C C1  | 2.6781292  | -0.3978923 | 0.4613271  |
| 20 | H H2  | 4.0143079  | -1.8713020 | 1.5919161  |
| 21 | C C6  | 3.3891107  | -1.1891739 | 1.0613974  |

### 4-pyridine\_LHS\_SM (9m)

G = -868.554947

iv = none

Cartesian Coordinates (Angstroms)

|   | Atom  | X          | Y          | Z          |
|---|-------|------------|------------|------------|
| 1 | C C1  | 1.7379906  | 1.0533701  | -1.0125123 |
| 2 | C C2  | 0.5948548  | 1.5544215  | -0.2227780 |
| 3 | C C3  | 0.8612826  | 0.0062370  | -0.4070529 |
| 4 | H H3  | -0.2344211 | 1.9188458  | -0.8277523 |
| 5 | H H6  | 1.2755361  | -0.4729380 | 0.4771572  |
| 6 | C C10 | -0.0500743 | -0.7951991 | -1.2344074 |



|    |   |     |            |            |            |
|----|---|-----|------------|------------|------------|
| 7  | H | H11 | -0.3979950 | -0.3587991 | -2.1691355 |
| 8  | C | C11 | -0.4826418 | -2.0238238 | -0.9158956 |
| 9  | H | H12 | -0.1760631 | -2.5312450 | -0.0058114 |
| 10 | C | C12 | -1.4082921 | -2.7431426 | -1.8178865 |
| 11 | O | O1  | -1.8477926 | -2.3196153 | -2.8698685 |
| 12 | O | O2  | -1.7178395 | -3.9617345 | -1.3139346 |
| 13 | C | C13 | -2.6120458 | -4.7454915 | -2.1180937 |
| 14 | H | H5  | -3.5544664 | -4.2138221 | -2.2744602 |
| 15 | H | H13 | -2.7778343 | -5.6670627 | -1.5592395 |
| 16 | H | H14 | -2.1631492 | -4.9616572 | -3.0915960 |
| 17 | F | F1  | 1.7223381  | 1.2232993  | -2.3539189 |
| 18 | F | F2  | 3.0003533  | 1.1868913  | -0.5460287 |
| 19 | C | C4  | 0.7315355  | 2.1769759  | 1.1301111  |
| 20 | N | N1  | 0.9105237  | 3.3755852  | 3.6778867  |
| 21 | C | C6  | -0.1933435 | 1.8824315  | 2.1393948  |
| 22 | C | C7  | 1.7489586  | 3.0877968  | 1.4319480  |
| 23 | C | C8  | 1.7909243  | 3.6507591  | 2.7088508  |
| 24 | C | C9  | -0.0613028 | 2.5028302  | 3.3802346  |
| 25 | H | H2  | -1.0006241 | 1.1775720  | 1.9604804  |
| 26 | H | H1  | 2.4979879  | 3.3500452  | 0.6929301  |
| 27 | H | H4  | 2.5765237  | 4.3602219  | 2.9639503  |
| 28 | H | H7  | -0.7709234 | 2.2872482  | 4.1774282  |

## 4-pyridine\_LHS\_TS2 (TS1m)

G = -868.512852

iv = i151

S<sup>2</sup> = 0.5934

Cartesian Coordinates (Angstroms)

| Atom     | X          | Y          | Z          |
|----------|------------|------------|------------|
| 1 C C    | 0.3070064  | 2.7970608  | -0.9446703 |
| 2 C C2   | -0.8702346 | 2.2484882  | -1.3570235 |
| 3 C C3   | -1.4285757 | 1.1354692  | -0.6765308 |
| 4 C C4   | 1.0819644  | 2.0509262  | 0.0900012  |
| 5 C C5   | 1.1037370  | 0.5761160  | -0.1992953 |
| 6 H H    | 0.7280987  | 3.7102181  | -1.3504719 |
| 7 H H7   | -1.3808928 | 2.6113983  | -2.2462561 |
| 8 H H8   | -1.2991936 | 1.0085770  | 0.3895858  |
| 9 H H12  | 0.9892222  | 0.3102938  | -1.2422746 |
| 10 F F1  | 2.3744958  | 2.5344481  | 0.1628290  |
| 11 F F2  | 0.5526452  | 2.2904937  | 1.3649280  |
| 12 C C1  | 1.6724039  | -0.4116988 | 0.6680910  |
| 13 N N1  | 2.7702392  | -2.4577611 | 2.2998445  |
| 14 C C7  | 1.9062917  | -1.7183103 | 0.1748682  |
| 15 C C8  | 2.0121818  | -0.1793825 | 2.0237279  |
| 16 C C9  | 2.5517642  | -1.2197246 | 2.7707856  |
| 17 C C10 | 2.4457148  | -2.6822852 | 1.0166428  |
| 18 H H2  | 1.6680436  | -1.9635620 | -0.8566372 |
| 19 H H6  | 1.8552203  | 0.7934610  | 2.4703350  |
| 20 H H5  | 2.8223384  | -1.0542993 | 3.8121624  |
| 21 H H3  | 2.6310239  | -3.6892368 | 0.6468259  |
| 22 C C11 | -2.4292836 | 0.2928172  | -1.3442906 |
| 23 O O1  | -2.7867842 | 0.4153052  | -2.5041783 |
| 24 O O2  | -2.9178859 | -0.6490733 | -0.5024576 |
| 25 C C12 | -3.9064488 | -1.5218351 | -1.0694465 |
| 26 H H1  | -4.7684266 | -0.9486601 | -1.4213600 |
| 27 H H9  | -4.1964768 | -2.1977280 | -0.2648775 |
| 28 H H10 | -3.4881892 | -2.0815155 | -1.9108571 |

## 2-pyridine\_SM (9n)

G = -868.560284

iv = none

Cartesian Coordinates (Angstroms)

| Atom    | X          | Y          | Z          |
|---------|------------|------------|------------|
| 1 C C1  | 2.1000029  | 0.5055043  | -0.6965333 |
| 2 C C2  | 0.9184896  | 1.2927387  | -0.2508197 |
| 3 C C3  | 0.9201405  | -0.2843109 | -0.2566169 |
| 4 H H3  | 0.3655689  | 1.7584852  | -1.0628600 |
| 5 H H6  | 1.0020918  | -0.6850727 | 0.7505895  |
| 6 C C10 | 0.0820217  | -1.0040781 | -1.2242092 |
| 7 H H11 | 0.0715084  | -0.6434600 | -2.2512806 |
| 8 C C11 | -0.6680193 | -2.0749420 | -0.9252445 |

|    |   |     |            |            |            |
|----|---|-----|------------|------------|------------|
| 9  | H | H12 | -0.7026792 | -2.4985163 | 0.0742806  |
| 10 | C | C12 | -1.4832540 | -2.7315458 | -1.9687958 |
| 11 | O | O1  | -1.5706412 | -2.3850279 | -3.1315743 |
| 12 | O | O2  | -2.1432411 | -3.7999312 | -1.4572169 |
| 13 | C | C13 | -2.9636894 | -4.5145889 | -2.3923749 |
| 14 | H | H5  | -3.7374900 | -3.8605552 | -2.8038684 |
| 15 | H | H13 | -3.4129366 | -5.3306347 | -1.8252458 |
| 16 | H | H14 | -2.3588262 | -4.9055369 | -3.2152852 |
| 17 | F | F1  | 2.4062756  | 0.5330426  | -2.0166253 |
| 18 | F | F2  | 3.2294763  | 0.4892063  | 0.0356387  |
| 19 | C | C4  | 0.8835237  | 2.0151828  | 1.0526041  |
| 20 | C | C5  | 0.4862175  | 4.0200942  | 2.3217539  |
| 21 | C | C6  | 1.2149747  | 1.9755476  | 3.3252197  |
| 22 | C | C7  | 0.8534596  | 3.3152944  | 3.4674928  |
| 23 | C | C9  | 0.5011632  | 3.3634083  | 1.0942391  |
| 24 | H | H1  | 0.1920557  | 5.0644380  | 2.3820080  |
| 25 | H | H10 | 1.5038450  | 1.3864459  | 4.1940646  |
| 26 | H | H7  | 0.8566146  | 3.7858904  | 4.4457855  |
| 27 | H | H4  | 0.2238540  | 3.8813328  | 0.1805933  |
| 28 | N | N1  | 1.2294931  | 1.3315891  | 2.1542812  |

## 2-pyridine\_LHS\_TS2 (TS1n)

G = -868.515403

iv = i143

S<sup>2</sup> = 0.6016

Cartesian Coordinates (Angstroms)

| Atom     | X          | Y          | Z          |
|----------|------------|------------|------------|
| 1 C C    | -1.3374758 | 2.5356748  | -1.0093448 |
| 2 C C2   | -2.2782936 | 1.6088466  | -0.6708224 |
| 3 C C3   | -1.9635131 | 0.5397633  | 0.2053482  |
| 4 C C4   | 0.0726353  | 2.2614527  | -0.6057535 |
| 5 C C5   | 0.4434383  | 0.8277131  | -0.8440428 |
| 6 H H    | -1.5466778 | 3.4307520  | -1.5847047 |
| 7 H H7   | -3.2738083 | 1.6322947  | -1.1088727 |
| 8 H H8   | -1.2360491 | 0.6601069  | 0.9961678  |
| 9 H H12  | -0.1008181 | 0.3085738  | -1.6207575 |
| 10 F F1  | 0.9380644  | 3.0934627  | -1.2933938 |
| 11 F F2  | 0.2717235  | 2.6027654  | 0.7419510  |
| 12 C C11 | -2.8012772 | -0.6650313 | 0.2258161  |
| 13 O O1  | -3.7626787 | -0.8645502 | -0.4984173 |
| 14 O O2  | -2.3748274 | -1.5432864 | 1.1655528  |
| 15 C C12 | -3.1247583 | -2.7633846 | 1.2453564  |
| 16 H H1  | -4.1702767 | -2.5577539 | 1.4924223  |
| 17 H H9  | -2.6510838 | -3.3472613 | 2.0353189  |
| 18 H H10 | -3.0865709 | -3.3018428 | 0.2938812  |
| 19 C C1  | 1.6820642  | 0.2233836  | -0.4512118 |
| 20 C C6  | 3.0429579  | -1.6244868 | -0.6922048 |
| 21 C C7  | 3.7697283  | 0.1398279  | 0.7639039  |
| 22 C C8  | 4.0071794  | -1.1069262 | 0.1855604  |
| 23 C C9  | 2.5956014  | 0.8152813  | 0.4550249  |
| 24 H H6  | 3.1965203  | -2.5964725 | -1.1593318 |
| 25 H H2  | 4.4882175  | 0.5785235  | 1.4508757  |

|      |     |           |            |            |
|------|-----|-----------|------------|------------|
| 26 H | H11 | 2.3721687 | 1.7800871  | 0.8912999  |
| 27 H | H15 | 4.9094911 | -1.6702421 | 0.4031932  |
| 28 N | N1  | 1.9183188 | -0.9972714 | -1.0128147 |

### mestial\_LHS\_SM (9o)

G = -931.084973

iv = none

#### Cartesian Coordinates (Angstroms)

|       | Atom | X          | Y          | Z          |
|-------|------|------------|------------|------------|
| ----- |      |            |            |            |
| 1 C   | C1   | 0.1004469  | 2.2220900  | 0.6645602  |
| 2 C   | C4   | 0.6179998  | 2.7845380  | 3.3602783  |
| 3 C   | C2   | 0.4412212  | 1.1795836  | 1.5534176  |
| 4 C   | C6   | -0.0085121 | 3.5271508  | 1.1593174  |
| 5 C   | C5   | 0.2335058  | 3.8095278  | 2.5001810  |
| 6 C   | C3   | 0.7356289  | 1.4666546  | 2.9061109  |
| 7 H   | H6   | -0.2769598 | 4.3290486  | 0.4757904  |
| 8 C   | C7   | 0.5808699  | -0.2319649 | 1.0555541  |
| 9 C   | C8   | -0.1705426 | -1.3846140 | 1.6029641  |
| 10 C  | C9   | -0.5552311 | -0.9555791 | 0.2298027  |
| 11 H  | H2   | 1.5767018  | -0.5169806 | 0.7105993  |
| 12 H  | H9   | -1.4941709 | -0.4095453 | 0.1875632  |
| 13 F  | F1   | -1.0798392 | -1.2110464 | 2.5911733  |
| 14 F  | F2   | 0.4777548  | -2.5599177 | 1.7786826  |
| 15 C  | C10  | -0.1959880 | -1.7500721 | -0.9518852 |
| 16 H  | H8   | 0.6860607  | -2.3846041 | -0.8834668 |
| 17 C  | C11  | -0.8754358 | -1.7385575 | -2.1084376 |
| 18 H  | H10  | -1.7676427 | -1.1355409 | -2.2504491 |
| 19 C  | C12  | -0.4247943 | -2.5601502 | -3.2515758 |
| 20 O  | O1   | 0.5476472  | -3.2903961 | -3.2670891 |
| 21 O  | O2   | -1.2497147 | -2.3917060 | -4.3140848 |
| 22 C  | C13  | -0.9012200 | -3.1455892 | -5.4840422 |
| 23 H  | H7   | -1.6573250 | -2.8967817 | -6.2294611 |
| 24 H  | H11  | -0.9114799 | -4.2176582 | -5.2686542 |
| 25 H  | H12  | 0.0948902  | -2.8669536 | -5.8391450 |
| 26 H  | H13  | 0.8410760  | 3.0050004  | 4.4012792  |
| 27 H  | H14  | 0.1448661  | 4.8280735  | 2.8688423  |
| 28 C  | C14  | 1.2027439  | 0.3953000  | 3.8685409  |
| 29 H  | H3   | 2.0048709  | -0.2166351 | 3.4392861  |
| 30 H  | H4   | 0.3904854  | -0.2853752 | 4.1410036  |
| 31 H  | H5   | 1.5858001  | 0.8469728  | 4.7884605  |
| 32 C  | C15  | -0.1261934 | 1.9824906  | -0.8125576 |
| 33 H  | H1   | 0.6219677  | 1.3088903  | -1.2428746 |
| 34 H  | H15  | -0.0814835 | 2.9275316  | -1.3626110 |
| 35 H  | H16  | -1.1080042 | 1.5368148  | -1.0170736 |

## mestial\_LHS\_TS2 (TS1o)

G = -931.03943

iv = i163

S<sup>2</sup> = 0.4019

### Cartesian Coordinates (Angstroms)

| Atom     | X          | Y          | Z          |
|----------|------------|------------|------------|
| 1 C C    | -0.9096073 | 2.9999154  | -0.6912791 |
| 2 C C2   | -2.0360516 | 2.2377163  | -0.7378677 |
| 3 C C3   | -2.1135924 | 1.0215839  | -0.0058768 |
| 4 C C4   | 0.2750223  | 2.4204254  | 0.0037197  |
| 5 C C5   | 0.4715012  | 0.9822567  | -0.3974421 |
| 6 H H    | -0.8218177 | 3.9896965  | -1.1255369 |
| 7 H H7   | -2.8733542 | 2.5030118  | -1.3800533 |
| 8 H H8   | -1.6394225 | 0.9189243  | 0.9604468  |
| 9 H H12  | -0.0225180 | 0.7726982  | -1.3310704 |
| 10 F F1  | 1.4016049  | 3.1758374  | -0.2977579 |
| 11 F F2  | 0.1212585  | 2.5546778  | 1.3887792  |
| 12 C C1  | 1.4217506  | -0.0048547 | 0.0215955  |
| 13 C C6  | 3.1264852  | -2.1716909 | 0.6879449  |
| 14 C C7  | 1.3363574  | -1.2694638 | -0.6749484 |
| 15 C C8  | 2.4113891  | 0.1340256  | 1.0593259  |
| 16 C C9  | 3.2330401  | -0.9551468 | 1.3562590  |
| 17 C C10 | 2.1784890  | -2.3184261 | -0.3231740 |
| 18 H H5  | 3.9816581  | -0.8398030 | 2.1353523  |
| 19 H H3  | 2.0933610  | -3.2653645 | -0.8495429 |
| 20 H H4  | 3.7819432  | -2.9982625 | 0.9491787  |
| 21 C C11 | -3.1018826 | 0.0086805  | -0.3848636 |
| 22 O O1  | -3.8836344 | 0.0960370  | -1.3186036 |
| 23 O O2  | -3.0497525 | -1.0689426 | 0.4432732  |
| 24 C C12 | -3.9932816 | -2.1074128 | 0.1491285  |
| 25 H H1  | -5.0179906 | -1.7422433 | 0.2652941  |
| 26 H H9  | -3.7880318 | -2.9023816 | 0.8670705  |
| 27 H H10 | -3.8644584 | -2.4699381 | -0.8747308 |
| 28 C C13 | 0.3217102  | -1.5138343 | -1.7672206 |
| 29 H H2  | 0.4539469  | -0.8378948 | -2.6220265 |
| 30 H H11 | -0.7036854 | -1.3781792 | -1.4022584 |
| 31 H H13 | 0.4101087  | -2.5361182 | -2.1452878 |
| 32 C C14 | 2.6522116  | 1.3956379  | 1.8523865  |
| 33 H H6  | 3.5569560  | 1.2846271  | 2.4567706  |
| 34 H H14 | 1.8176205  | 1.6153149  | 2.5241571  |
| 35 H H15 | 2.7726663  | 2.2688901  | 1.2088587  |

## CN\_LHS\_SM (9p)

G = -713.768678

iv = none

Cartesian Coordinates (Angstroms)

| Atom     | X          | Y          | Z          |
|----------|------------|------------|------------|
| 1 C C1   | 2.1105281  | 2.1676364  | 0.0607816  |
| 2 C C2   | 0.9282908  | 2.6973176  | 0.8055329  |
| 3 C C3   | 1.2084693  | 1.1411205  | 0.6469596  |
| 4 H H3   | 0.1174426  | 3.0867177  | 0.1951720  |
| 5 H H6   | 1.5781365  | 0.6749817  | 1.5564852  |
| 6 C C10  | 0.2994338  | 0.3482683  | -0.1952820 |
| 7 H H11  | -0.0074648 | 0.7713752  | -1.1498698 |
| 8 C C11  | -0.1680119 | -0.8609948 | 0.1413430  |
| 9 H H12  | 0.0980057  | -1.3501675 | 1.0737703  |
| 10 C C12 | -1.0836522 | -1.5834987 | -0.7736110 |
| 11 O O1  | -1.4813821 | -1.1690509 | -1.8448390 |
| 12 O O2  | -1.4294060 | -2.7821559 | -0.2538465 |
| 13 C C13 | -2.3207190 | -3.5670072 | -1.0628304 |
| 14 H H5  | -3.2547926 | -3.0265207 | -1.2372134 |
| 15 H H13 | -2.5037297 | -4.4796588 | -0.4953127 |
| 16 H H14 | -1.8592968 | -3.7978324 | -2.0267518 |
| 17 F F1  | 2.1283668  | 2.3361226  | -1.2752149 |
| 18 F F2  | 3.3385408  | 2.3297532  | 0.5788564  |
| 19 C C4  | 1.0853552  | 3.2951414  | 2.1015202  |
| 20 N N1  | 1.2158852  | 3.7684526  | 3.1543505  |

## CN\_TS2\_LHS (TS1p)

G = -713.721964

iv = i155

S<sup>2</sup> = 0.7284

Cartesian Coordinates (Angstroms)

| Atom     | X          | Y          | Z          |
|----------|------------|------------|------------|
| 1 C C    | 0.6241679  | 2.4031406  | -0.2738745 |
| 2 C C2   | -0.4805786 | 1.6202633  | -0.4326921 |
| 3 C C3   | -0.5716376 | 0.3395870  | 0.1665526  |
| 4 C C4   | 1.8411921  | 1.7973544  | 0.3558040  |
| 5 C C5   | 2.0667465  | 0.3810862  | -0.1131399 |
| 6 H H    | 0.6878658  | 3.4299286  | -0.6174105 |
| 7 H H7   | -1.3048091 | 1.9405880  | -1.0662309 |
| 8 H H8   | -0.0794007 | 0.1167471  | 1.1042300  |
| 9 H H12  | 1.8288848  | 0.1377578  | -1.1414734 |
| 10 F F1  | 2.9471866  | 2.5617131  | 0.0595204  |
| 11 F F2  | 1.7442745  | 1.8038173  | 1.7346643  |
| 12 C C11 | -1.5489598 | -0.6406201 | -0.3373632 |
| 13 O O1  | -2.2846036 | -0.4580160 | -1.2919570 |
| 14 O O2  | -1.5247731 | -1.7723946 | 0.3978188  |
| 15 C C12 | -2.4409557 | -2.7978593 | -0.0199103 |
| 16 H H1  | -3.4727192 | -2.4461302 | 0.0688983  |

|    |   |     |            |            |            |
|----|---|-----|------------|------------|------------|
| 17 | H | H9  | -2.2617445 | -3.6389979 | 0.6500185  |
| 18 | H | H10 | -2.2500442 | -3.0821967 | -1.0583823 |
| 19 | C | C1  | 2.9068816  | -0.4760555 | 0.6003823  |
| 20 | N | N1  | 3.5730261  | -1.2197129 | 1.2145449  |

### bis\_Me\_SM (9q)

G = -700.111308

iv = none

Cartesian Coordinates (Angstroms)

| Atom     | X          | Y          | Z          |
|----------|------------|------------|------------|
| 1 C C1   | 2.0731041  | 1.4329992  | -0.0574773 |
| 2 C C2   | 0.9105710  | 2.0532084  | 0.6154089  |
| 3 C C3   | 1.0819624  | 0.4757247  | 0.5293786  |
| 4 H H6   | 1.3885151  | 0.0266553  | 1.4718288  |
| 5 C C10  | 0.2298959  | -0.3588462 | -0.3263205 |
| 6 H H11  | -0.0043230 | -0.0017723 | -1.3264940 |
| 7 C C11  | -0.2750917 | -1.5474524 | 0.0392841  |
| 8 H H12  | -0.0818387 | -1.9863458 | 1.0138698  |
| 9 C C12  | -1.1201020 | -2.3171720 | -0.8962823 |
| 10 O O1  | -1.4474721 | -1.9684929 | -2.0150925 |
| 11 O O2  | -1.5010940 | -3.4947810 | -0.3414644 |
| 12 C C13 | -2.3270747 | -4.3210829 | -1.1737455 |
| 13 H H5  | -3.2622960 | -3.8090614 | -1.4171567 |
| 14 H H13 | -2.5237829 | -5.2216600 | -0.5908583 |
| 15 H H14 | -1.8096520 | -4.5700095 | -2.1043086 |
| 16 F F1  | 2.1749089  | 1.5080913  | -1.4073872 |
| 17 F F2  | 3.3089790  | 1.5151021  | 0.4929244  |
| 18 C C4  | 1.1196354  | 2.6538467  | 1.9943286  |
| 19 H H2  | 1.3688246  | 3.7187737  | 1.9119609  |
| 20 H H1  | 1.9340872  | 2.1627737  | 2.5336219  |
| 21 H H4  | 0.2046912  | 2.5670947  | 2.5917509  |
| 22 C C5  | -0.1555183 | 2.7305982  | -0.2274199 |
| 23 H H3  | 0.0607406  | 3.8027064  | -0.3054149 |
| 24 H H7  | -1.1418916 | 2.6190904  | 0.2369124  |
| 25 H H8  | -0.2057783 | 2.3300117  | -1.2418472 |

### bis\_Me\_TS2 (TS1q)

G = -700.060667

iv = i100

S<sup>2</sup> = 0.7900

Cartesian Coordinates (Angstroms)

| Atom   | X          | Y         | Z          |
|--------|------------|-----------|------------|
| 1 C C  | 0.1237299  | 2.3869725 | -0.1597606 |
| 2 C C2 | -1.0083310 | 1.6232422 | -0.1860150 |
| 3 C C3 | -1.0802427 | 0.3424862 | 0.4046702  |
| 4 C C4 | 1.4031081  | 1.8012226 | 0.3541250  |
| 5 C C5 | 1.6811928  | 0.3858892 | -0.0908040 |
| 6 H H  | 0.1467319  | 3.4180567 | -0.4968980 |

|    |   |     |            |            |            |
|----|---|-----|------------|------------|------------|
| 7  | H | H7  | -1.8932190 | 1.9779903  | -0.7108761 |
| 8  | H | H8  | -0.4412332 | 0.0606467  | 1.2306433  |
| 9  | F | F1  | 2.4620626  | 2.6105992  | -0.0533107 |
| 10 | F | F2  | 1.4223842  | 1.8616800  | 1.7422396  |
| 11 | C | C11 | -2.1665313 | -0.5719112 | 0.0454378  |
| 12 | O | O1  | -3.0467581 | -0.3398684 | -0.7678811 |
| 13 | O | O2  | -2.0779041 | -1.7366836 | 0.7382398  |
| 14 | C | C12 | -3.0991150 | -2.6990411 | 0.4427816  |
| 15 | H | H1  | -4.0897223 | -2.2910524 | 0.6629351  |
| 16 | H | H9  | -2.8872352 | -3.5573064 | 1.0817029  |
| 17 | H | H10 | -3.0645781 | -2.9878448 | -0.6119782 |
| 18 | C | C1  | 2.5335867  | -0.4762974 | 0.7855487  |
| 19 | H | H2  | 3.6034920  | -0.2525135 | 0.6302659  |
| 20 | H | H3  | 2.3934697  | -1.5349386 | 0.5393255  |
| 21 | H | H4  | 2.3220170  | -0.3237354 | 1.8460327  |
| 22 | C | C6  | 1.6772984  | 0.1237909  | -1.5629317 |
| 23 | H | H5  | 2.6195015  | 0.4789808  | -2.0145781 |
| 24 | H | H6  | 0.8634720  | 0.6478645  | -2.0733145 |
| 25 | H | H11 | 1.6028234  | -0.9482291 | -1.7756002 |

### spiro\_Cy\_SM (9r)

G = -816.783222

iv = none

Cartesian Coordinates (Angstroms)

|    | Atom | X   | Y          | Z          |            |
|----|------|-----|------------|------------|------------|
| 1  | C    | C7  | 0.8338418  | 0.2700360  | 1.6681000  |
| 2  | C    | C8  | 1.3019352  | -1.0963801 | 1.9585323  |
| 3  | C    | C9  | 0.1199460  | -1.0099642 | 1.0427021  |
| 4  | H    | H9  | -0.8364595 | -1.2368433 | 1.5094591  |
| 5  | F    | F1  | 1.1361577  | -1.6278679 | 3.1952081  |
| 6  | F    | F2  | 2.4865374  | -1.5127188 | 1.4443376  |
| 7  | C    | C10 | 0.2327149  | -1.3458225 | -0.3817849 |
| 8  | H    | H8  | 1.2117319  | -1.2760414 | -0.8494771 |
| 9  | C    | C11 | -0.7940576 | -1.7382254 | -1.1529121 |
| 10 | H    | H10 | -1.8033911 | -1.8477723 | -0.7663437 |
| 11 | C    | C12 | -0.5809612 | -2.0369866 | -2.5837731 |
| 12 | O    | O1  | 0.4763905  | -1.9589756 | -3.1808004 |
| 13 | C    | C1  | 0.0253239  | 1.0203924  | 2.7196751  |
| 14 | C    | C3  | 1.6510379  | 1.1890916  | 0.7694728  |
| 15 | C    | C5  | -0.0685140 | 3.0189961  | 1.1530655  |
| 16 | C    | C4  | 0.7469214  | 2.2428305  | 0.1069988  |
| 17 | C    | C6  | -0.8763674 | 2.0762243  | 2.0588939  |
| 18 | H    | H6  | 2.4012181  | 1.6924191  | 1.3970295  |
| 19 | H    | H1  | 0.6167925  | 3.6165654  | 1.7724597  |
| 20 | H    | H3  | 0.0654169  | 1.7409366  | -0.5935039 |
| 21 | H    | H4  | -1.6452781 | 1.5663157  | 1.4610916  |
| 22 | H    | H13 | -0.5610714 | 0.3219513  | 3.3257121  |
| 23 | H    | H14 | 2.2108182  | 0.6259676  | 0.0173195  |
| 24 | H    | H15 | -0.7402863 | 3.7301518  | 0.6567296  |
| 25 | H    | H16 | 1.3571245  | 2.9335692  | -0.4875397 |
| 26 | H    | H17 | -1.4061865 | 2.6472244  | 2.8313489  |
| 27 | H    | H19 | 0.7275683  | 1.5149340  | 3.4072191  |



|    |   |    |            |            |            |
|----|---|----|------------|------------|------------|
| 28 | O | O2 | -1.7431661 | -2.4142474 | -3.1732278 |
| 29 | C | C2 | -1.6457089 | -2.7183003 | -4.5716870 |
| 30 | H | H2 | -0.9410616 | -3.5372764 | -4.7398430 |
| 31 | H | H5 | -1.3079479 | -1.8430298 | -5.1339370 |
| 32 | H | H7 | -2.6510199 | -3.0071538 | -4.8805256 |

### spiro\_Cy\_TS2 (TS1r)

G = -816.731056

iv = i97

S<sup>2</sup> = 0.7478

Cartesian Coordinates (Angstroms)

|    | Atom  | X          | Y          | Z          |
|----|-------|------------|------------|------------|
| 1  | C C   | -0.9106382 | 0.1385209  | -2.4198357 |
| 2  | C C2  | -2.0066762 | 0.0588373  | -1.6096145 |
| 3  | C C3  | -2.0468213 | 0.6448966  | -0.3245854 |
| 4  | C C4  | 0.3617085  | 0.7027390  | -1.8766115 |
| 5  | C C5  | 0.7101923  | 0.2673726  | -0.4763650 |
| 6  | H H   | -0.9127853 | -0.1936752 | -3.4526047 |
| 7  | H H7  | -2.8809086 | -0.5071742 | -1.9252811 |
| 8  | H H8  | -1.4417739 | 1.5058868  | -0.0739070 |
| 9  | F F1  | 1.4122950  | 0.3522255  | -2.7348973 |
| 10 | F F2  | 0.3253288  | 2.0931194  | -1.9280441 |
| 11 | C C11 | -3.0625295 | 0.2215394  | 0.6410615  |
| 12 | O O1  | -3.9253566 | -0.6174316 | 0.4373100  |
| 13 | O O2  | -2.9288840 | 0.8840187  | 1.8196481  |
| 14 | C C12 | -3.8809944 | 0.5254657  | 2.8300970  |
| 15 | H H1  | -4.8911736 | 0.8195024  | 2.5290081  |
| 16 | H H9  | -3.5784079 | 1.0691925  | 3.7260809  |
| 17 | H H10 | -3.8678857 | -0.5531413 | 3.0093056  |
| 18 | C C1  | 0.7278114  | -1.1969004 | -0.1483625 |
| 19 | C C6  | 3.1970845  | -0.9642782 | 0.4242527  |
| 20 | C C7  | 1.6949869  | 1.0935451  | 0.2973150  |
| 21 | C C8  | 3.1336164  | 0.5342591  | 0.0967162  |
| 22 | C C10 | 2.1569301  | -1.7667288 | -0.3710193 |
| 23 | H H6  | 3.0191287  | -1.1074851 | 1.5005324  |
| 24 | H H2  | 1.4469283  | 1.0280261  | 1.3671402  |
| 25 | H H3  | 3.4328635  | 0.7002145  | -0.9452832 |
| 26 | H H4  | 2.3923188  | -1.7226277 | -1.4412872 |
| 27 | H H5  | -0.0026178 | -1.7533951 | -0.7426260 |
| 28 | H H12 | 4.2045241  | -1.3485397 | 0.2199300  |
| 29 | H H13 | 1.6477085  | 2.1463858  | 0.0092794  |
| 30 | H H14 | 3.8312146  | 1.0989149  | 0.7277639  |
| 31 | H H16 | 2.1753025  | -2.8235721 | -0.0765909 |
| 32 | H H17 | 0.4675095  | -1.3297124 | 0.9114743  |

## Me\_LHS\_SM (9s)

G = -660.822287

iv = none

Cartesian Coordinates (Angstroms)

| Atom     | X          | Y          | Z          |
|----------|------------|------------|------------|
| 1 C C1   | 2.0231665  | 1.8219797  | -0.1009084 |
| 2 C C2   | 0.8591224  | 2.3957932  | 0.5973220  |
| 3 C C3   | 1.0653756  | 0.8373953  | 0.4948820  |
| 4 H H3   | 0.0828452  | 2.7793574  | -0.0623670 |
| 5 H H6   | 1.4065548  | 0.3683184  | 1.4155768  |
| 6 C C10  | 0.1794920  | 0.0384012  | -0.3610723 |
| 7 H H11  | -0.1057450 | 0.4597875  | -1.3234845 |
| 8 C C11  | -0.3015600 | -1.1721524 | -0.0405860 |
| 9 H H12  | -0.0568987 | -1.6648328 | 0.8959144  |
| 10 C C12 | -1.1930632 | -1.8907679 | -0.9742955 |
| 11 O O1  | -1.5745636 | -1.4815698 | -2.0545686 |
| 12 O O2  | -1.5477945 | -3.0970966 | -0.4663047 |
| 13 C C13 | -2.4130947 | -3.8792491 | -1.3015377 |
| 14 H H5  | -3.3460342 | -3.3437464 | -1.4979605 |
| 15 H H13 | -2.6068929 | -4.7973238 | -0.7456777 |
| 16 H H14 | -1.9280348 | -4.1029442 | -2.2558562 |
| 17 F F1  | 2.1083142  | 1.9187173  | -1.4481460 |
| 18 F F2  | 3.2560764  | 1.9357782  | 0.4474883  |
| 19 C C4  | 0.9961342  | 3.0828046  | 1.9380245  |
| 20 H H2  | 1.1842622  | 4.1541589  | 1.8037964  |
| 21 H H1  | 1.8310465  | 2.6675779  | 2.5100867  |
| 22 H H4  | 0.0812917  | 2.9696133  | 2.5296743  |

## Me\_LHS\_TS2 (TS1s)

G = -660.768319

iv = i131

S<sup>2</sup> = 0.6779

Cartesian Coordinates (Angstroms)

| Atom     | X          | Y          | Z          |
|----------|------------|------------|------------|
| 1 C C    | 0.3085323  | 2.3948690  | -0.3713510 |
| 2 C C2   | -0.8130753 | 1.6163945  | -0.4309390 |
| 3 C C3   | -0.8733321 | 0.3534257  | 0.2006025  |
| 4 C C4   | 1.5557584  | 1.7871013  | 0.1739419  |
| 5 C C5   | 1.7883266  | 0.4037325  | -0.3426420 |
| 6 H H    | 0.3500821  | 3.4137669  | -0.7408256 |
| 7 H H7   | -1.6791382 | 1.9321921  | -1.0087759 |
| 8 H H8   | -0.2831662 | 0.1347899  | 1.0804898  |
| 9 H H12  | 1.3603866  | 0.1697550  | -1.3099371 |
| 10 F F1  | 2.6477364  | 2.5869476  | -0.1376405 |
| 11 F F2  | 1.5407328  | 1.7597005  | 1.5709135  |
| 12 C C11 | -1.9181127 | -0.6061449 | -0.1751014 |
| 13 O O1  | -2.7455039 | -0.4375735 | -1.0556302 |
| 14 O O2  | -1.8572819 | -1.7243077 | 0.5904331  |

|    |   |     |            |            |            |
|----|---|-----|------------|------------|------------|
| 15 | C | C12 | -2.8504334 | -2.7170042 | 0.2970293  |
| 16 | H | H1  | -3.8548958 | -2.3160435 | 0.4598089  |
| 17 | H | H9  | -2.6521582 | -3.5419732 | 0.9820799  |
| 18 | H | H10 | -2.7687977 | -3.0501926 | -0.7414680 |
| 19 | C | C1  | 2.9503630  | -0.3851851 | 0.1507666  |
| 20 | H | H2  | 3.8623132  | -0.1334861 | -0.4167327 |
| 21 | H | H3  | 2.7802482  | -1.4597707 | 0.0183974  |
| 22 | H | H4  | 3.1514158  | -0.1809937 | 1.2065809  |

### Cyclohexane\_LHS\_SM (9t)

G = -856.068176

iv = none

Cartesian Coordinates (Angstroms)

|    | Atom  | X          | Y          | Z          |
|----|-------|------------|------------|------------|
| 1  | C C1  | 1.8132546  | -0.1254555 | -1.2431369 |
| 2  | C C2  | 0.6689606  | 0.5838044  | -0.6484235 |
| 3  | C C3  | 0.7976203  | -0.9827691 | -0.5514934 |
| 4  | H H6  | 1.0980521  | -1.3510941 | 0.4276266  |
| 5  | C C10 | -0.0974759 | -1.8420595 | -1.3358473 |
| 6  | H H11 | -0.3637252 | -1.5051304 | -2.3363689 |
| 7  | C C11 | -0.6038909 | -3.0121600 | -0.9186998 |
| 8  | H H12 | -0.3800074 | -3.4297584 | 0.0586900  |
| 9  | C C12 | -1.4888097 | -3.7946546 | -1.8059083 |
| 10 | O O1  | -1.8576938 | -3.4646708 | -2.9173734 |
| 11 | O O2  | -1.8499558 | -4.9621632 | -1.2174127 |
| 12 | C C13 | -2.7011198 | -5.8031835 | -2.0087260 |
| 13 | H H5  | -3.6432313 | -5.2952692 | -2.2332015 |
| 14 | H H13 | -2.8796215 | -6.6930651 | -1.4039693 |
| 15 | H H14 | -2.2120140 | -6.0690561 | -2.9498777 |
| 16 | F F1  | 1.9300157  | -0.2036574 | -2.5895176 |
| 17 | F F2  | 3.0420992  | 0.0008356  | -0.6833144 |
| 18 | H H27 | -0.0787439 | 0.9222028  | -1.3654762 |
| 19 | C C4  | 0.8320289  | 1.4467615  | 0.5901217  |
| 20 | C C5  | 1.5341502  | 3.7458363  | 1.4385367  |
| 21 | C C6  | -0.3191983 | 2.4784660  | 2.6147853  |
| 22 | C C7  | 0.2214645  | 3.8631329  | 2.2267911  |
| 23 | C C8  | -0.4816357 | 1.5709344  | 1.3856840  |
| 24 | C C9  | 1.3760635  | 2.8396635  | 0.2090836  |
| 25 | H H1  | 2.3145050  | 3.3312512  | 2.0936405  |
| 26 | H H10 | 0.3738144  | 2.0058396  | 3.3264914  |
| 27 | H H7  | -0.5259304 | 4.3824974  | 1.6086663  |
| 28 | H H2  | -1.2592787 | 1.9886008  | 0.7282212  |
| 29 | H H3  | 0.6841610  | 3.3106055  | -0.5056947 |
| 30 | H H4  | 1.5795893  | 0.9671361  | 1.2389613  |
| 31 | H H8  | 1.8840046  | 4.7383857  | 1.1281029  |
| 32 | H H9  | -1.2801993 | 2.5756065  | 3.1353638  |
| 33 | H H15 | 0.3682606  | 4.4789489  | 3.1231632  |
| 34 | H H16 | -0.8321850 | 0.5758432  | 1.6887860  |
| 35 | H H17 | 2.3366723  | 2.7277945  | -0.3082738 |

## Cyclohexane\_LHS\_TS2 (TS1t)

G = -856.014022

iv = i85

S<sup>2</sup> = 0.6959

Cartesian Coordinates (Angstroms)

| Atom     | X          | Y          | Z          |
|----------|------------|------------|------------|
| 1 C C    | -1.1459943 | 3.1420549  | -0.3807845 |
| 2 C C2   | -2.3123754 | 2.4309537  | -0.4431040 |
| 3 C C3   | -2.4581901 | 1.1834592  | 0.2011743  |
| 4 C C4   | 0.0639459  | 2.4728074  | 0.1785269  |
| 5 C C5   | 0.2378422  | 1.0780749  | -0.3265326 |
| 6 H H    | -1.0443228 | 4.1549539  | -0.7551947 |
| 7 H H7   | -3.1534524 | 2.7964908  | -1.0285193 |
| 8 H H8   | -1.8743492 | 0.9306885  | 1.0759075  |
| 9 H H12  | -0.1990978 | 0.8539743  | -1.2939466 |
| 10 F F1  | 1.1937126  | 3.2292701  | -0.1245203 |
| 11 F F2  | 0.0351417  | 2.4568309  | 1.5756810  |
| 12 C C11 | -3.5671769 | 0.2930240  | -0.1557100 |
| 13 O O1  | -4.3893255 | 0.5049005  | -1.0319125 |
| 14 O O2  | -3.5758169 | -0.8171822 | 0.6256282  |
| 15 C C12 | -4.6388617 | -1.7415579 | 0.3566904  |
| 16 H H1  | -5.6111052 | -1.2696221 | 0.5252804  |
| 17 H H9  | -4.4906418 | -2.5695469 | 1.0508394  |
| 18 H H10 | -4.5931794 | -2.0931125 | -0.6779004 |
| 19 C C1  | 1.3281238  | 0.2014565  | 0.1880883  |
| 20 C C6  | 2.0361646  | -2.2017771 | 0.6649187  |
| 21 C C7  | 3.7606359  | -0.5154607 | -0.1164017 |
| 22 C C8  | 3.3347840  | -1.9902941 | -0.1272322 |
| 23 C C9  | 2.6408840  | 0.4018975  | -0.6276467 |
| 24 C C10 | 0.9096345  | -1.2879287 | 0.1613144  |
| 25 H H6  | 2.2214743  | -1.9930558 | 1.7287106  |
| 26 H H2  | 4.0288647  | -0.2203249 | 0.9085850  |
| 27 H H3  | 3.1802209  | -2.3140483 | -1.1672855 |
| 28 H H11 | 2.4375610  | 0.1804705  | -1.6856019 |
| 29 H H4  | 0.6471647  | -1.5634168 | -0.8713829 |
| 30 H H5  | 1.5382216  | 0.4850275  | 1.2284702  |
| 31 H H13 | 1.7187659  | -3.2504677 | 0.6040024  |
| 32 H H14 | 4.6613020  | -0.3721416 | -0.7272798 |
| 33 H H15 | 4.1354506  | -2.6202288 | 0.2804987  |
| 34 H H16 | 2.9425636  | 1.4522243  | -0.5736873 |
| 35 H H17 | 0.0014311  | -1.4283938 | 0.7603263  |

## Nosub\_SM (9u)

G = -621.530722

iv = none

Cartesian Coordinates (Angstroms)

| Atom     | X          | Y          | Z          |
|----------|------------|------------|------------|
| 1 C C1   | 2.2693226  | 2.2659885  | 0.0864734  |
| 2 C C2   | 1.1197603  | 2.9740186  | 0.6698508  |
| 3 C C3   | 1.2450634  | 1.4144417  | 0.7701306  |
| 4 H H6   | 1.5344577  | 1.0450348  | 1.7510014  |
| 5 C C10  | 0.3425391  | 0.5632196  | -0.0173407 |
| 6 H H11  | 0.0778347  | 0.9032775  | -1.0171279 |
| 7 C C11  | -0.1726064 | -0.6001362 | 0.4056053  |
| 8 H H12  | 0.0465146  | -1.0118713 | 1.3865594  |
| 9 C C12  | -1.0708885 | -1.3795287 | -0.4724605 |
| 10 O O1  | -1.4275210 | -1.0602966 | -1.5906800 |
| 11 O O2  | -1.4615842 | -2.5255858 | 0.1371570  |
| 12 C C13 | -2.3404688 | -3.3567339 | -0.6346471 |
| 13 H H5  | -3.2668138 | -2.8246330 | -0.8690111 |
| 14 H H13 | -2.5467023 | -4.2262388 | -0.0095105 |
| 15 H H14 | -1.8609645 | -3.6579635 | -1.5697553 |
| 16 F F1  | 2.3857290  | 2.1922397  | -1.2587838 |
| 17 F F2  | 3.4912239  | 2.3878929  | 0.6511892  |
| 18 H H19 | 1.2698913  | 3.5329598  | 1.5878548  |
| 19 H H27 | 0.3652130  | 3.3639145  | -0.0065050 |

## Nosub\_TS2 (TS1u)

G = -621.573778, iv = i192, S<sup>2</sup> = 0.7541

Cartesian Coordinates (Angstroms)

| Atom     | X          | Y          | Z          |
|----------|------------|------------|------------|
| 1 C C    | 0.7946670  | 2.3077343  | -0.3275513 |
| 2 C C2   | -0.3207882 | 1.5191922  | -0.3512372 |
| 3 C C3   | -0.3471353 | 0.2472733  | 0.2644960  |
| 4 C C4   | 2.0777544  | 1.7153433  | 0.1641641  |
| 5 C C5   | 2.2929621  | 0.3245173  | -0.3214240 |
| 6 H H    | 0.8063598  | 3.3332337  | -0.6810900 |
| 7 H H7   | -1.2132158 | 1.8362782  | -0.8866403 |
| 8 H H8   | 0.2852294  | 0.0174445  | 1.1119224  |
| 9 H H12  | 1.9390721  | 0.0455178  | -1.3051098 |
| 10 F F1  | 3.1381612  | 2.5196024  | -0.2259812 |
| 11 F F2  | 2.1241288  | 1.7200433  | 1.5552521  |
| 12 C C11 | -1.3975823 | -0.7187094 | -0.0857327 |
| 13 O O1  | -2.2725753 | -0.5339239 | -0.9149029 |
| 14 O O2  | -1.2755861 | -1.8575817 | 0.6374555  |
| 15 C C12 | -2.2574039 | -2.8663948 | 0.3575224  |
| 16 H H1  | -3.2646088 | -2.4873954 | 0.5511549  |
| 17 H H9  | -2.0236528 | -3.6957507 | 1.0256294  |
| 18 H H10 | -2.1949143 | -3.1843250 | -0.6871621 |
| 19 H H14 | 3.1091280  | -0.2420994 | 0.1192347  |

## Traige: Alkene Substitution

### CN\_E\_RHS\_SM (10a)

Spartan'10: G = -716.912803, iv = none

Gaussian'09: B3LYP/6-31G\*, G = -716.917313, iv = none

Gaussian'09: M05-2X/6-31G\*, G = -716.875782, iv = none

Cartesian Coordinates (Angstroms)

|    | Atom  | X          | Y          | Z          |
|----|-------|------------|------------|------------|
| 1  | C C1  | 1.2099133  | -0.0977419 | -1.6065770 |
| 2  | C C2  | 0.0590977  | 0.4469622  | -0.8600824 |
| 3  | C C3  | 0.2832058  | -1.1118198 | -1.0155466 |
| 4  | H H3  | -0.7357640 | 0.8262827  | -1.5022389 |
| 5  | H H6  | 0.6520854  | -1.5923392 | -0.1124772 |
| 6  | C C4  | 0.1766691  | 1.0873485  | 0.4884279  |
| 7  | C C5  | 0.3166115  | 2.3312581  | 2.9990340  |
| 8  | C C6  | -0.7584871 | 0.7817166  | 1.4871255  |
| 9  | C C7  | 1.1837058  | 2.0222044  | 0.7609151  |
| 10 | C C8  | 1.2518592  | 2.6400825  | 2.0107107  |
| 11 | C C9  | -0.6903124 | 1.3999595  | 2.7345575  |
| 12 | H H4  | -1.5401211 | 0.0543296  | 1.2818457  |
| 13 | H H7  | 1.9166062  | 2.2596338  | -0.0034322 |
| 14 | H H8  | 2.0386332  | 3.3621794  | 2.2112263  |
| 15 | H H9  | -1.4215208 | 1.1546333  | 3.5000254  |
| 16 | H H10 | 0.3715235  | 2.8128553  | 3.9715426  |
| 17 | C C10 | -0.6131026 | -1.9007668 | -1.8689807 |
| 18 | H H11 | -0.9056200 | -1.4587226 | -2.8188340 |
| 19 | C C11 | -1.0781109 | -3.1203258 | -1.5398247 |
| 20 | H H12 | -0.7980410 | -3.5941554 | -0.6016563 |
| 21 | F F1  | 1.2349442  | 0.0471189  | -2.9525554 |
| 22 | F F2  | 2.4623054  | 0.0002929  | -1.1107415 |
| 23 | C C12 | -1.9519651 | -3.8639691 | -2.3870171 |
| 24 | N N1  | -2.6641154 | -4.4870174 | -3.0654468 |

### CN\_E\_RHS\_TS2 (TS2a)

Spartan'10: G = -716.875779, iv = i139, S<sup>2</sup> = 0.5463

Gaussian'09: B3LYP/6-31G\*, G = -716.878006, iv = i142, S<sup>2</sup> = 0.71

Gaussian'09: M05-2X/6-31G\*, G = -716.822858, iv = i163, S<sup>2</sup> = 0.87

Cartesian Coordinates (Angstroms)

|   | Atom  | X          | Y         | Z          |
|---|-------|------------|-----------|------------|
| 1 | C C   | -2.0151459 | 2.2303766 | -0.0973687 |
| 2 | C C2  | -2.9431550 | 1.3505820 | 0.3674799  |
| 3 | C C3  | -2.5398690 | 0.1873772 | 1.0918623  |
| 4 | C C4  | -0.5821229 | 1.8287807 | -0.0075954 |
| 5 | C C5  | -0.3850858 | 0.4037320 | -0.4380687 |
| 6 | H H   | -2.2614819 | 3.1842132 | -0.5498818 |
| 7 | H H7  | -4.0012889 | 1.4983995 | 0.1605929  |
| 8 | H H8  | -1.6636352 | 0.2188718 | 1.7271340  |
| 9 | H H12 | -1.1535598 | 0.0087404 | -1.0894109 |

|    |   |     |            |            |            |
|----|---|-----|------------|------------|------------|
| 10 | F | F1  | 0.2022057  | 2.6699625  | -0.7739606 |
| 11 | F | F2  | -0.1019806 | 2.0131870  | 1.2992351  |
| 12 | C | C1  | 0.8586417  | -0.2923927 | -0.3976390 |
| 13 | C | C6  | 3.2581461  | -1.7749134 | -0.3738577 |
| 14 | C | C7  | 0.9563986  | -1.5448774 | -1.0627802 |
| 15 | C | C8  | 2.0071669  | 0.1905469  | 0.2877517  |
| 16 | C | C9  | 3.1855331  | -0.5420531 | 0.2868369  |
| 17 | C | C10 | 2.1357579  | -2.2738553 | -1.0474285 |
| 18 | H | H2  | 0.0850569  | -1.9299378 | -1.5868042 |
| 19 | H | H6  | 1.9565916  | 1.1379754  | 0.8093028  |
| 20 | H | H5  | 4.0568926  | -0.1560074 | 0.8089601  |
| 21 | H | H3  | 2.1878759  | -3.2298883 | -1.5607497 |
| 22 | H | H4  | 4.1834916  | -2.3440671 | -0.3629747 |
| 23 | C | C11 | -3.3726726 | -0.9440476 | 1.2101815  |
| 24 | N | N1  | -4.0537612 | -1.8907052 | 1.2991830  |

### Weinreb\_Amide\_RHS\_SM (10b)

Spartan'10: G = -947.067954, iv = none

Gaussian'09: B3LYP/6-31G\*, G = -947.076299, iv = none

Gaussian'09: M05-2X/6-31G\*, G = -947.020971, iv = none

Cartesian Coordinates (Angstroms)

|    | Atom | X     | Y          | Z          |            |
|----|------|-------|------------|------------|------------|
|    |      | ----- | -----      | -----      |            |
| 1  | C    | C1    | -1.4670215 | -1.8630042 | -0.2979475 |
| 2  | C    | C2    | -1.7954595 | -0.7553857 | 0.6210089  |
| 3  | C    | C3    | -0.5077807 | -0.7195424 | -0.3017992 |
| 4  | H    | H3    | -1.5563263 | -0.9723070 | 1.6617199  |
| 5  | H    | H6    | -0.6081401 | -0.0550275 | -1.1571230 |
| 6  | C    | C4    | -2.9022014 | 0.2271570  | 0.4004430  |
| 7  | C    | C5    | -4.9645210 | 2.1066034  | 0.0780893  |
| 8  | C    | C6    | -2.7137389 | 1.5659107  | 0.7746769  |
| 9  | C    | C7    | -4.1376207 | -0.1588032 | -0.1355554 |
| 10 | C    | C8    | -5.1610036 | 0.7773159  | -0.2962337 |
| 11 | C    | C9    | -3.7364277 | 2.4990068  | 0.6162029  |
| 12 | H    | H4    | -1.7569553 | 1.8733261  | 1.1900092  |
| 13 | H    | H7    | -4.2953475 | -1.1902837 | -0.4317271 |
| 14 | H    | H8    | -6.1137281 | 0.4635579  | -0.7144940 |
| 15 | H    | H9    | -3.5747818 | 3.5324214  | 0.9112700  |
| 16 | H    | H10   | -5.7625886 | 2.8333963  | -0.0472600 |
| 17 | C    | C10   | 0.8266066  | -0.8336070 | 0.2998313  |
| 18 | H    | H11   | 0.9617074  | -1.5572226 | 1.1015221  |
| 19 | C    | C11   | 1.8856003  | -0.0975559 | -0.0705567 |
| 20 | H    | H12   | 1.8128700  | 0.6439152  | -0.8574601 |
| 21 | C    | C12   | 3.1819019  | -0.2851643 | 0.6277332  |
| 22 | O    | O1    | 3.3361624  | -1.0633959 | 1.5655795  |
| 23 | N    | N1    | 4.2673549  | 0.4261932  | 0.1278718  |
| 24 | C    | C13   | 5.4661468  | 0.6116434  | 0.9286587  |
| 25 | H    | H5    | 5.5681329  | -0.2635093 | 1.5695692  |
| 26 | H    | H13   | 5.3895370  | 1.5154256  | 1.5463922  |
| 27 | H    | H14   | 6.3395043  | 0.6949450  | 0.2750625  |
| 28 | F    | F1    | -1.0729595 | -3.0457522 | 0.2301305  |
| 29 | F    | F2    | -2.2134450 | -2.0857404 | -1.4061244 |
| 30 | O    | O2    | 3.9800488  | 1.5460992  | -0.6824481 |

|    |   |     |           |           |            |
|----|---|-----|-----------|-----------|------------|
| 31 | C | C14 | 4.4328597 | 1.3118606 | -2.0186236 |
| 32 | H | H2  | 4.2195193 | 2.2375591 | -2.5596953 |
| 33 | H | H1  | 3.8943077 | 0.4753809 | -2.4795787 |
| 34 | H | H15 | 5.5107114 | 1.1111478 | -2.0471366 |

### Weinreb\_amide\_RHS\_TS2 (TS2b)

Spartan'10: G = -947.029070, iv = i127, S<sup>2</sup> = 0.5635

Gaussian'09: B3LYP/6-31G\*, G = -947.034526, iv = i142, S<sup>2</sup> = 0.55

Gaussian'09: M05-2X/6-31G\*, G = -716.829881, iv = i163, S<sup>2</sup> = 0.87

#### Cartesian Coordinates (Angstroms)

|    | Atom | X   | Y          | Z          |            |
|----|------|-----|------------|------------|------------|
| 1  | C    | C   | -0.3708103 | 3.2467077  | -0.7831259 |
| 2  | C    | C2  | -1.5345291 | 2.5375201  | -0.8136579 |
| 3  | C    | C3  | -1.6370972 | 1.2810981  | -0.1615410 |
| 4  | C    | C4  | 0.8362767  | 2.5577318  | -0.2460828 |
| 5  | C    | C5  | 0.9440416  | 1.1547946  | -0.7683250 |
| 6  | H    | H   | -0.2640747 | 4.2559235  | -1.1654640 |
| 7  | H    | H7  | -2.3928187 | 2.8872876  | -1.3828514 |
| 8  | H    | H8  | -1.0886985 | 1.0873996  | 0.7477209  |
| 9  | H    | H12 | 0.4333421  | 0.9712623  | -1.7046199 |
| 10 | F    | F1  | 1.9794635  | 3.2721405  | -0.5629116 |
| 11 | F    | F2  | 0.8234439  | 2.5560476  | 1.1595635  |
| 12 | C    | C1  | 1.9584378  | 0.2243082  | -0.3835976 |
| 13 | C    | C6  | 3.9199424  | -1.6910241 | 0.2942364  |
| 14 | C    | C7  | 2.1243885  | -0.9626358 | -1.1474145 |
| 15 | C    | C8  | 2.8072229  | 0.4142519  | 0.7398366  |
| 16 | C    | C9  | 3.7737304  | -0.5287123 | 1.0609754  |
| 17 | C    | C10 | 3.0871008  | -1.9039211 | -0.8110489 |
| 18 | H    | H2  | 1.4847797  | -1.1228519 | -2.0121957 |
| 19 | H    | H6  | 2.6945236  | 1.3061860  | 1.3428490  |
| 20 | H    | H5  | 4.4196154  | -0.3619704 | 1.9188608  |
| 21 | H    | H3  | 3.1977030  | -2.8027072 | -1.4116446 |
| 22 | H    | H4  | 4.6764064  | -2.4256027 | 0.5560373  |
| 23 | C    | C11 | -2.7109407 | 0.3574663  | -0.5597123 |
| 24 | O    | O1  | -3.4753177 | 0.5889965  | -1.4986722 |
| 25 | N    | N1  | -2.7996676 | -0.8457652 | 0.1359310  |
| 26 | O    | O2  | -2.1985384 | -0.8783023 | 1.4133387  |
| 27 | C    | C12 | -4.0180133 | -1.6373118 | 0.0779455  |
| 28 | H    | H9  | -3.7798796 | -2.6879591 | 0.2658295  |
| 29 | H    | H10 | -4.4370453 | -1.5272446 | -0.9217100 |
| 30 | H    | H11 | -4.7482652 | -1.2934599 | 0.8216190  |
| 31 | C    | C13 | -1.1294124 | -1.8306027 | 1.4283861  |
| 32 | H    | H1  | -0.7534186 | -1.8191473 | 2.4549569  |
| 33 | H    | H13 | -0.3318626 | -1.5429230 | 0.7352616  |
| 34 | H    | H14 | -1.4900290 | -2.8369809 | 1.1812269  |



### AllylAlcohol\_RHS\_E\_SM (10c)

G = -739.155508

iv = none

Cartesian Coordinates (Angstroms)

| Atom     | X          | Y          | Z          |
|----------|------------|------------|------------|
| 1 C C1   | 0.2555785  | 2.1890182  | 0.4890142  |
| 2 C C4   | -0.0090838 | 2.6009899  | 3.2310042  |
| 3 C C2   | 0.3676012  | 1.0972270  | 1.3622191  |
| 4 C C6   | 0.0168255  | 3.4717008  | 0.9799304  |
| 5 C C5   | -0.1172528 | 3.6810733  | 2.3545178  |
| 6 C C3   | 0.2336460  | 1.3170931  | 2.7394558  |
| 7 H H6   | -0.0667795 | 4.3074216  | 0.2899720  |
| 8 C C7   | 0.6624323  | -0.2635615 | 0.8118213  |
| 9 C C8   | 0.0034628  | -1.4998679 | 1.2885984  |
| 10 C C9  | -0.4096150 | -1.0224052 | -0.0598878 |
| 11 H H2  | 1.6825928  | -0.4228790 | 0.4619987  |
| 12 H H9  | -1.3779573 | -0.5256805 | -0.0738933 |
| 13 F F1  | -0.8920404 | -1.4510192 | 2.3058011  |
| 14 F F2  | 0.7442514  | -2.6307156 | 1.3926437  |
| 15 C C10 | -0.0144213 | -1.7308339 | -1.2938316 |
| 16 C C11 | -0.7356426 | -1.7174309 | -2.4181920 |
| 17 H H10 | -1.6777015 | -1.1702959 | -2.4622000 |
| 18 H H13 | -0.1140383 | 2.7552384  | 4.3017809  |
| 19 H H14 | -0.3054297 | 4.6800810  | 2.7388050  |
| 20 H H17 | 0.3109915  | 0.4797849  | 3.4253868  |
| 21 H H3  | 0.3540560  | 2.0251906  | -0.5814957 |
| 22 H H12 | 0.9182520  | -2.2882847 | -1.2718986 |
| 23 C C12 | -0.3541539 | -2.4248015 | -3.6850703 |
| 24 H H1  | -0.3431852 | -1.6949674 | -4.5151730 |
| 25 H H4  | -1.1372756 | -3.1636898 | -3.9344604 |
| 26 O O1  | 0.9111033  | -3.0494862 | -3.5340332 |
| 27 H H5  | 1.0937834  | -3.5488993 | -4.3428135 |

### allylalcohol\_RHS\_E\_TS2 (TS2c)

G = -739.115497

iv = i149

S<sup>2</sup> = 0.5638

Cartesian Coordinates (Angstroms)

| Atom    | X          | Y         | Z          |
|---------|------------|-----------|------------|
| 1 C C   | -0.9916180 | 2.5756204 | -0.6751842 |
| 2 C C2  | -2.1559361 | 1.8593542 | -0.5635713 |
| 3 C C3  | -2.2167936 | 0.7019090 | 0.2369574  |
| 4 C C4  | 0.2411986  | 1.9532219 | -0.1246117 |
| 5 C C5  | 0.3251911  | 0.5046037 | -0.4913438 |
| 6 H H   | -0.9166136 | 3.5396422 | -1.1658984 |
| 7 H H8  | -1.5833461 | 0.6228962 | 1.1114011  |
| 8 H H12 | -0.2252742 | 0.2257674 | -1.3802903 |
| 9 F F1  | 1.3654598  | 2.6372691 | -0.5628246 |

|    |   |     |            |            |            |
|----|---|-----|------------|------------|------------|
| 10 | F | F2  | 0.2941675  | 2.1103313  | 1.2790261  |
| 11 | C | C1  | 1.3651672  | -0.3820207 | -0.0641299 |
| 12 | C | C6  | 3.3555405  | -2.2306219 | 0.7196571  |
| 13 | C | C7  | 1.5116549  | -1.6321336 | -0.7209743 |
| 14 | C | C8  | 2.2515829  | -0.0921458 | 1.0071926  |
| 15 | C | C9  | 3.2304789  | -1.0033181 | 1.3810741  |
| 16 | C | C10 | 2.4878426  | -2.5398509 | -0.3345601 |
| 17 | H | H2  | 0.8427593  | -1.8714578 | -1.5445940 |
| 18 | H | H6  | 2.1571432  | 0.8506500  | 1.5309215  |
| 19 | H | H5  | 3.9032527  | -0.7590580 | 2.1991517  |
| 20 | H | H3  | 2.5795329  | -3.4894655 | -0.8552001 |
| 21 | H | H4  | 4.1215079  | -2.9392671 | 1.0226611  |
| 22 | H | H14 | -3.0327146 | 2.1343550  | -1.1457768 |
| 23 | C | C11 | -3.3073964 | -0.3132689 | 0.1297800  |
| 24 | H | H1  | -4.0085898 | -0.1780739 | 0.9764311  |
| 25 | H | H7  | -2.8726158 | -1.3209940 | 0.2537061  |
| 26 | O | O1  | -3.9795164 | -0.1834506 | -1.1147506 |
| 27 | H | H9  | -4.7420651 | -0.7804935 | -1.1042495 |

### Me\_RHS\_E\_SM (10d)

G = -663.957928

iv = none

Cartesian Coordinates (Angstroms)

|    | Atom  | X          | Y          | Z          |
|----|-------|------------|------------|------------|
| 1  | C C1  | 0.4009824  | 2.0386001  | 0.3731448  |
| 2  | C C4  | -0.0441784 | 2.4200530  | 3.0959599  |
| 3  | C C2  | 0.3917446  | 0.9285029  | 1.2304266  |
| 4  | C C6  | 0.1932558  | 3.3240719  | 0.8705544  |
| 5  | C C5  | -0.0312215 | 3.5181574  | 2.2355956  |
| 6  | C C3  | 0.1679087  | 1.1329872  | 2.5983758  |
| 7  | H H6  | 0.2045607  | 4.1739084  | 0.1930297  |
| 8  | C C7  | 0.6594677  | -0.4356104 | 0.6749485  |
| 9  | C C8  | -0.0604812 | -1.6558925 | 1.1030610  |
| 10 | C C9  | -0.3990780 | -1.1480238 | -0.2537758 |
| 11 | H H2  | 1.6880637  | -0.6259657 | 0.3677942  |
| 12 | H H9  | -1.3489336 | -0.6193858 | -0.3044273 |
| 13 | F F1  | -0.9952085 | -1.5969659 | 2.0833357  |
| 14 | F F2  | 0.6411994  | -2.8117864 | 1.2177540  |
| 15 | C C10 | 0.0217734  | -1.8588060 | -1.4791923 |
| 16 | C C11 | -0.6265763 | -1.7904779 | -2.6471827 |
| 17 | H H10 | -1.5257926 | -1.1758116 | -2.7142843 |
| 18 | H H13 | -0.2193715 | 2.5626497  | 4.1591164  |
| 19 | H H14 | -0.1950732 | 4.5194536  | 2.6249715  |
| 20 | H H17 | 0.1518618  | 0.2821452  | 3.2714201  |
| 21 | H H3  | 0.5698026  | 1.8869875  | -0.6903161 |
| 22 | H H12 | 0.9179436  | -2.4736188 | -1.3967510 |
| 23 | C C12 | -0.2172187 | -2.5078523 | -3.9001855 |
| 24 | H H1  | 0.6855317  | -3.1076787 | -3.7429439 |
| 25 | H H4  | -0.0183799 | -1.8012469 | -4.7175624 |
| 26 | H H5  | -1.0125826 | -3.1783942 | -4.2528668 |

### Me\_RHS\_E\_TS2 (TS2d)

G = -663.917301

iv = i184

S<sup>2</sup> = 0.5585

Cartesian Coordinates (Angstroms)

| Atom     | X          | Y          | Z          |
|----------|------------|------------|------------|
| 1 C C    | -0.9151383 | 2.6513547  | -0.7786512 |
| 2 C C2   | -2.1077249 | 1.9853535  | -0.8954940 |
| 3 C C3   | -2.3582101 | 0.7899579  | -0.1888719 |
| 4 C C4   | 0.1849905  | 1.9441886  | -0.0714278 |
| 5 C C5   | 0.2556601  | 0.5076570  | -0.4856083 |
| 6 H H    | -0.7255362 | 3.6365584  | -1.1899678 |
| 7 H H8   | -1.8833208 | 0.6491853  | 0.7747308  |
| 8 H H12  | -0.1358502 | 0.3017099  | -1.4732521 |
| 9 F F1   | 1.3945439  | 2.5835277  | -0.3012456 |
| 10 F F2  | 0.0234202  | 2.0493885  | 1.3265275  |
| 11 C C1  | 1.1528036  | -0.4591358 | 0.0724220  |
| 12 C C6  | 2.8706507  | -2.4587781 | 1.0962271  |
| 13 C C7  | 1.3491309  | -1.6865482 | -0.6134791 |
| 14 C C8  | 1.8458027  | -0.2716662 | 1.2975662  |
| 15 C C9  | 2.6926693  | -1.2560728 | 1.7896820  |
| 16 C C10 | 2.1907439  | -2.6682562 | -0.1092948 |
| 17 H H2  | 0.8298147  | -1.8495212 | -1.5553695 |
| 18 H H6  | 1.7092330  | 0.6511676  | 1.8469904  |
| 19 H H5  | 3.2177380  | -1.0883929 | 2.7266783  |
| 20 H H3  | 2.3247423  | -3.5980963 | -0.6560184 |
| 21 H H4  | 3.5316207  | -3.2251805 | 1.4915181  |
| 22 H H14 | -2.8650800 | 2.3500191  | -1.5911246 |
| 23 C C11 | -3.4330427 | -0.1819377 | -0.5617517 |
| 24 H H1  | -3.0292397 | -1.2005583 | -0.6427918 |
| 25 H H7  | -3.9040764 | 0.0698443  | -1.5176679 |
| 26 H H9  | -4.2163453 | -0.2257684 | 0.2096742  |

### nosub\_RHS\_SM (10e)

G = -624.665083

iv = none

Cartesian Coordinates (Angstroms)

| Atom    | X          | Y         | Z          |
|---------|------------|-----------|------------|
| 1 H H1  | -0.7768006 | 1.0388829 | -1.6047737 |
| 2 C C1  | -0.7173554 | 1.4647263 | -0.6059672 |
| 3 C C4  | -0.5698059 | 2.5451006 | 1.9567121  |
| 4 C C2  | 0.1393784  | 0.8803837 | 0.3387670  |
| 5 C C6  | -1.4888334 | 2.5770693 | -0.2751774 |
| 6 C C5  | -1.4173630 | 3.1205023 | 1.0098283  |
| 7 C C3  | 0.2059673  | 1.4328222 | 1.6246422  |
| 8 H H6  | -2.1470385 | 3.0188171 | -1.0187338 |
| 9 H H5  | -2.0187004 | 3.9875695 | 1.2699744  |
| 10 H H3 | 0.8604990  | 0.9879185 | 2.3665809  |

|    |   |     |            |            |            |
|----|---|-----|------------|------------|------------|
| 11 | H | H4  | -0.5091567 | 2.9619231  | 2.9586068  |
| 12 | C | C7  | 0.9869728  | -0.2859276 | -0.0643017 |
| 13 | C | C8  | 1.2810050  | -1.4418712 | 0.8111093  |
| 14 | C | C9  | 0.3385846  | -1.7037254 | -0.3110794 |
| 15 | H | H9  | -0.7064157 | -1.7584663 | -0.0129154 |
| 16 | F | F1  | 0.8141422  | -1.4814324 | 2.0827236  |
| 17 | F | F2  | 2.5240203  | -1.9833723 | 0.7679361  |
| 18 | C | C10 | 0.7298449  | -2.5175481 | -1.4803324 |
| 19 | H | H8  | 1.7922604  | -2.5300748 | -1.7195707 |
| 20 | C | C11 | -0.1267143 | -3.2164337 | -2.2292022 |
| 21 | H | H10 | -1.1933096 | -3.2345539 | -2.0164315 |
| 22 | H | H2  | 1.7888044  | -0.0620621 | -0.7678205 |
| 23 | H | H13 | 0.2100143  | -3.8002475 | -3.0805750 |

### nosub\_RHS\_TS2 (TS2e)

G = -624.623111

iv = i300

S<sup>2</sup> = 0.5749

### Cartesian Coordinates (Angstroms)

|    | Atom | X   | Y          | Z          |            |
|----|------|-----|------------|------------|------------|
| 1  | C    | C   | -1.7874470 | 2.4421631  | -0.5045635 |
| 2  | C    | C2  | -2.9103076 | 1.6546177  | -0.5179662 |
| 3  | C    | C3  | -2.9306507 | 0.4028033  | 0.1255955  |
| 4  | C    | C4  | -0.5366945 | 1.8213362  | 0.0097436  |
| 5  | C    | C5  | -0.3654349 | 0.4249353  | -0.5081575 |
| 6  | H    | H   | -1.7528806 | 3.4631134  | -0.8681306 |
| 7  | H    | H7  | -3.7853806 | 1.9730485  | -1.0847020 |
| 8  | H    | H8  | -2.3409283 | 0.2191327  | 1.0131394  |
| 9  | H    | H12 | -0.8595597 | 0.2241621  | -1.4499067 |
| 10 | F    | F1  | 0.5605938  | 2.5993423  | -0.3282603 |
| 11 | F    | F2  | -0.5231132 | 1.8293521  | 1.4181294  |
| 12 | C    | C1  | 0.6996512  | -0.4548601 | -0.1310145 |
| 13 | C    | C6  | 2.7580381  | -2.2748292 | 0.5294732  |
| 14 | C    | C7  | 0.9343812  | -1.6177403 | -0.9109320 |
| 15 | C    | C8  | 1.5307144  | -0.2392681 | 1.0000659  |
| 16 | C    | C9  | 2.5445757  | -1.1348745 | 1.3131165  |
| 17 | C    | C10 | 1.9442125  | -2.5118766 | -0.5846335 |
| 18 | H    | H2  | 0.3072605  | -1.8002019 | -1.7805825 |
| 19 | H    | H6  | 1.3680550  | 0.6346591  | 1.6181396  |
| 20 | H    | H5  | 3.1740740  | -0.9480413 | 2.1792411  |
| 21 | H    | H3  | 2.1048388  | -3.3940255 | -1.1988995 |
| 22 | H    | H4  | 3.5500534  | -2.9732849 | 0.7852097  |
| 23 | H    | H11 | -3.6840514 | -0.3396633 | -0.1241046 |

### AllylAlcohol\_RHS\_Z\_SM (10f)

G = -739.152680

iv = none

Cartesian Coordinates (Angstroms)

| Atom     | X          | Y          | Z          |
|----------|------------|------------|------------|
| 1 C C1   | 0.0851050  | 1.6761281  | 0.3841732  |
| 2 C C4   | 0.9694170  | 2.3216998  | 2.9514251  |
| 3 C C2   | 0.7293453  | 0.7021926  | 1.1574226  |
| 4 C C6   | -0.1117169 | 2.9621284  | 0.8898064  |
| 5 C C5   | 0.3298641  | 3.2887861  | 2.1730192  |
| 6 C C3   | 1.1666918  | 1.0368216  | 2.4462655  |
| 7 H H6   | -0.6130479 | 3.7100865  | 0.2806242  |
| 8 C C7   | 0.9817207  | -0.6701300 | 0.6123821  |
| 9 C C8   | 0.3001452  | -1.8728140 | 1.1463146  |
| 10 C C9  | -0.1309859 | -1.4173229 | -0.2025879 |
| 11 H H2  | 1.9948860  | -0.8646646 | 0.2592903  |
| 12 H H9  | -1.0772748 | -0.8910040 | -0.2262031 |
| 13 F F1  | -0.5547505 | -1.7599330 | 2.1893523  |
| 14 F F2  | 1.0125521  | -3.0239942 | 1.2656796  |
| 15 C C10 | 0.2344924  | -2.1846184 | -1.4139185 |
| 16 C C11 | -0.2989358 | -2.0996594 | -2.6390618 |
| 17 H H10 | 0.1029440  | -2.7637087 | -3.4044095 |
| 18 H H13 | 1.3107232  | 2.5658500  | 3.9540720  |
| 19 H H14 | 0.1735724  | 4.2899330  | 2.5661627  |
| 20 H H17 | 1.6597545  | 0.2828651  | 3.0547075  |
| 21 H H3  | -0.2702189 | 1.4158108  | -0.6094971 |
| 22 H H12 | 1.0420510  | -2.9017490 | -1.2741580 |
| 23 C C12 | -1.4035451 | -1.2271609 | -3.1634237 |
| 24 H H1  | -2.2789188 | -1.8620928 | -3.3906656 |
| 25 H H4  | -1.0748721 | -0.8007048 | -4.1272752 |
| 26 O O1  | -1.7595442 | -0.1917930 | -2.2533476 |
| 27 H H5  | -2.5194536 | 0.2790478  | -2.6261489 |

### AllylAlcohol\_RHS\_Z\_TS2 (TS2f)

G = -739.107323

iv = i244

S<sup>2</sup> = 0.6641

Cartesian Coordinates (Angstroms)

| Atom    | X          | Y          | Z          |
|---------|------------|------------|------------|
| 1 C C   | -2.1259931 | 2.0740105  | -0.1662080 |
| 2 C C2  | -2.5424791 | 1.5174060  | 1.0086412  |
| 3 C C15 | -1.8016030 | 0.6027220  | 1.8031781  |
| 4 C C4  | -0.9168276 | 1.5576179  | -0.8649583 |
| 5 C C13 | -0.7384488 | 0.0873205  | -0.6639539 |
| 6 H H   | -2.6797738 | 2.8649364  | -0.6622078 |
| 7 H H8  | -2.3837208 | -0.0497596 | 2.4558284  |
| 8 H H12 | -1.6672560 | -0.4609286 | -0.5726305 |
| 9 F F1  | -1.0227259 | 1.8395517  | -2.2240077 |

|    |   |     |            |            |            |
|----|---|-----|------------|------------|------------|
| 10 | F | F2  | 0.2272279  | 2.2801359  | -0.4820522 |
| 11 | C | C1  | 0.4300140  | -0.6726015 | -0.9764675 |
| 12 | C | C6  | 2.6656667  | -2.3058208 | -1.5618602 |
| 13 | C | C7  | 0.3417808  | -2.0913285 | -0.9412475 |
| 14 | C | C8  | 1.6894536  | -0.1010288 | -1.3069829 |
| 15 | C | C9  | 2.7777544  | -0.9110292 | -1.6028171 |
| 16 | C | C10 | 1.4388181  | -2.8908837 | -1.2260127 |
| 17 | H | H2  | -0.6111088 | -2.5494343 | -0.6868931 |
| 18 | H | H6  | 1.7894984  | 0.9759755  | -1.3396011 |
| 19 | H | H5  | 3.7265815  | -0.4526459 | -1.8683576 |
| 20 | H | H3  | 1.3419452  | -3.9726504 | -1.1924436 |
| 21 | H | H4  | 3.5248236  | -2.9305226 | -1.7894764 |
| 22 | H | H14 | -3.5589411 | 1.7394595  | 1.3403955  |
| 23 | C | C11 | -0.3624922 | 0.6962153  | 2.2256699  |
| 24 | H | H1  | 0.1722012  | 1.4506196  | 1.6412898  |
| 25 | H | H7  | 0.1431767  | -0.2710079 | 2.0799692  |
| 26 | O | O1  | -0.3830862 | 1.0317742  | 3.6228611  |
| 27 | H | H9  | 0.5255144  | 0.9418970  | 3.9503449  |

### Me\_Z\_RHS\_SM (10g)

G = -664.955651

iv = none

Cartesian Coordinates (Angstroms)

|    | Atom | X   | Y          | Z          |            |
|----|------|-----|------------|------------|------------|
| 1  | C    | C1  | 0.6876844  | 1.8059308  | 0.2717546  |
| 2  | C    | C4  | 0.2332772  | 2.1619593  | 2.9962718  |
| 3  | C    | C2  | 0.6402783  | 0.6845481  | 1.1130431  |
| 4  | C    | C6  | 0.5129610  | 3.0897137  | 0.7856787  |
| 5  | C    | C5  | 0.2839789  | 3.2711096  | 2.1517316  |
| 6  | C    | C3  | 0.4122952  | 0.8762936  | 2.4822057  |
| 7  | H    | H6  | 0.5541235  | 3.9482377  | 0.1204040  |
| 8  | C    | C7  | 0.8758488  | -0.6774199 | 0.5386953  |
| 9  | C    | C8  | 0.1402163  | -1.8910747 | 0.9564978  |
| 10 | C    | C9  | -0.2033816 | -1.3607236 | -0.3908768 |
| 11 | H    | H2  | 1.8972229  | -0.8817126 | 0.2169921  |
| 12 | H    | H9  | -1.1441406 | -0.8177792 | -0.4139133 |
| 13 | F    | F1  | -0.7876269 | -1.8294679 | 1.9434392  |
| 14 | F    | F2  | 0.8237780  | -3.0590947 | 1.0536399  |
| 15 | C    | C10 | 0.2126043  | -2.0669876 | -1.6213846 |
| 16 | C    | C11 | -0.3788681 | -2.0009782 | -2.8219581 |
| 17 | H    | H13 | 0.0549811  | 2.2947349  | 4.0601739  |
| 18 | H    | H14 | 0.1465586  | 4.2711907  | 2.5541931  |
| 19 | H    | H17 | 0.3680571  | 0.0172382  | 3.1433062  |
| 20 | H    | H3  | 0.8611049  | 1.6644457  | -0.7923559 |
| 21 | H    | H5  | 0.0623687  | -2.5931285 | -3.6236434 |
| 22 | H    | H12 | 1.0901639  | -2.7021730 | -1.5132039 |
| 23 | C    | C12 | -1.5928016 | -1.2066712 | -3.2116891 |
| 24 | H    | H1  | -1.3569106 | -0.5121795 | -4.0294335 |
| 25 | H    | H4  | -2.0052938 | -0.6196340 | -2.3862491 |
| 26 | H    | H7  | -2.3884795 | -1.8663773 | -3.5833190 |

## Me\_Z\_RHS\_TS2 (TS2g)

G = -663.908400

iv = i271

S<sup>2</sup> = 0.7108

### Cartesian Coordinates (Angstroms)

| Atom     | X          | Y          | Z          |
|----------|------------|------------|------------|
| 1 C C    | -1.5504450 | 2.4776641  | -0.6191524 |
| 2 C C2   | -2.6238280 | 1.6386294  | -0.6718734 |
| 3 C C3   | -2.6681504 | 0.3067540  | -0.1672499 |
| 4 C C4   | -0.2008042 | 1.9546502  | -0.2616217 |
| 5 C C5   | 0.0096776  | 0.5600419  | -0.7584830 |
| 6 H H    | -1.6142070 | 3.5236503  | -0.9017007 |
| 7 H H12  | -0.4798152 | 0.3547298  | -1.7024576 |
| 8 F F1   | 0.7668653  | 2.7997959  | -0.7985427 |
| 9 F F2   | 0.0214425  | 2.0575976  | 1.1224109  |
| 10 C C1  | 1.0293103  | -0.3495120 | -0.3479285 |
| 11 C C6  | 2.9841249  | -2.2674036 | 0.3711957  |
| 12 C C7  | 1.2144525  | -1.5409105 | -1.1033773 |
| 13 C C8  | 1.8610609  | -0.1597168 | 0.7899370  |
| 14 C C9  | 2.8220179  | -1.1026679 | 1.1298415  |
| 15 C C10 | 2.1707081  | -2.4804807 | -0.7487619 |
| 16 H H2  | 0.5883137  | -1.7070611 | -1.9770387 |
| 17 H H6  | 1.7452761  | 0.7351629  | 1.3868514  |
| 18 H H5  | 3.4518718  | -0.9319488 | 1.9991310  |
| 19 H H3  | 2.2898196  | -3.3812381 | -1.3451807 |
| 20 H H4  | 3.7347479  | -3.0020007 | 0.6493852  |
| 21 H H7  | -3.3665500 | -0.3611418 | -0.6760890 |
| 22 H H14 | -3.5119600 | 1.9904034  | -1.2035033 |
| 23 C C11 | -2.2362635 | -0.1744225 | 1.1888731  |
| 24 H H1  | -1.5813535 | 0.5328307  | 1.6967027  |
| 25 H H8  | -1.7263941 | -1.1446348 | 1.1324948  |
| 26 H H9  | -3.1299182 | -0.3287709 | 1.8161379  |

## CN\_Z\_RHS\_SM (10h)

Spartan'10: G = -716.912699, iv = none

Gaussian'09: B3LYP/6-31G\*, G = -716.917609, iv = none

Gaussian'09: M05-2X/6-31G\*, G = -716.877091, iv = none

### Cartesian Coordinates (Angstroms)

| Atom   | X          | Y          | Z          |
|--------|------------|------------|------------|
| 1 C C1 | 0.8179847  | 0.4610398  | -1.8635220 |
| 2 C C2 | -0.3416567 | 0.4689995  | -0.9506254 |
| 3 C C3 | 0.4045255  | -0.8718587 | -1.3259301 |
| 4 H H3 | -1.2995784 | 0.5872061  | -1.4573460 |
| 5 H H6 | 1.0320986  | -1.2635388 | -0.5294869 |
| 6 C C4 | -0.2651222 | 0.9957873  | 0.4498269  |
| 7 C C5 | -0.1980338 | 2.0131451  | 3.0630712  |
| 8 C C6 | -0.7499435 | 0.2341961  | 1.5211498  |
| 9 C C7 | 0.2576765  | 2.2709732  | 0.7012935  |

|    |   |     |            |            |            |
|----|---|-----|------------|------------|------------|
| 10 | C | C8  | 0.2898950  | 2.7763162  | 2.0014705  |
| 11 | C | C9  | -0.7179257 | 0.7399927  | 2.8203014  |
| 12 | H | H4  | -1.1462860 | -0.7610274 | 1.3358170  |
| 13 | H | H7  | 0.6466198  | 2.8635872  | -0.1213348 |
| 14 | H | H8  | 0.7007166  | 3.7655608  | 2.1843421  |
| 15 | H | H9  | -1.0945771 | 0.1378479  | 3.6425950  |
| 16 | H | H10 | -0.1699119 | 2.4064027  | 4.0757033  |
| 17 | C | C10 | -0.2505385 | -1.8537494 | -2.1986835 |
| 18 | H | H11 | -0.7665948 | -1.4637915 | -3.0729015 |
| 19 | C | C11 | -0.2592490 | -3.1874688 | -2.0083162 |
| 20 | H | H12 | -0.7683717 | -3.8396237 | -2.7121403 |
| 21 | F | F1  | 1.9994365  | 0.9831711  | -1.4741208 |
| 22 | F | F2  | 0.6103896  | 0.7185857  | -3.1784391 |
| 23 | C | C12 | 0.3781323  | -3.8268640 | -0.9027312 |
| 24 | N | N1  | 0.8903143  | -4.3548891 | 0.0000069  |

### CN\_Z\_RHS\_TS2 (TS2h)

Spartan'10: G = -716.865358, iv = i141, S<sup>2</sup> = 0.6948

Gaussian'09: B3LYP/6-31G\*, G = -716.870285, iv = i165, S<sup>2</sup> = 0.71

Gaussian'09: M05-2X/6-31G\*, G = -716.822858, iv = i157, S<sup>2</sup> = 0.87

Cartesian Coordinates (Angstroms)

|    | Atom | X   | Y          | Z          |            |
|----|------|-----|------------|------------|------------|
| 1  | C    | C   | -1.6959458 | 2.4322037  | -0.5853651 |
| 2  | C    | C2  | -2.8320034 | 1.6728406  | -0.5751580 |
| 3  | C    | C3  | -2.9807398 | 0.3998630  | 0.0375008  |
| 4  | C    | C4  | -0.4175204 | 1.8559479  | -0.1169702 |
| 5  | C    | C5  | -0.2444133 | 0.4520397  | -0.6140125 |
| 6  | H    | H   | -1.6942970 | 3.4655487  | -0.9128003 |
| 7  | H    | H7  | -3.6967941 | 2.0395279  | -1.1290636 |
| 8  | H    | H12 | -0.8219802 | 0.2020451  | -1.4936243 |
| 9  | F    | F1  | 0.6514990  | 2.6240699  | -0.5853241 |
| 10 | F    | F2  | -0.2852804 | 1.9416445  | 1.2749634  |
| 11 | C    | C1  | 0.8219841  | -0.4094148 | -0.2537761 |
| 12 | C    | C6  | 2.8634354  | -2.2330723 | 0.4205645  |
| 13 | C    | C7  | 1.0618240  | -1.5728641 | -1.0405546 |
| 14 | C    | C8  | 1.6432015  | -0.1977193 | 0.8914358  |
| 15 | C    | C9  | 2.6488791  | -1.0981051 | 1.2106711  |
| 16 | C    | C10 | 2.0650588  | -2.4670966 | -0.7082571 |
| 17 | H    | H2  | 0.4437234  | -1.7493459 | -1.9171956 |
| 18 | H    | H6  | 1.4717272  | 0.6691657  | 1.5142291  |
| 19 | H    | H5  | 3.2624894  | -0.9291043 | 2.0913627  |
| 20 | H    | H3  | 2.2336450  | -3.3494409 | -1.3192103 |
| 21 | H    | H4  | 3.6455019  | -2.9392286 | 0.6860434  |
| 22 | H    | H9  | -3.8222598 | -0.2064568 | -0.3046222 |
| 23 | C    | C11 | -2.3987703 | -0.0760801 | 1.2324707  |
| 24 | N    | N1  | -1.9229643 | -0.5269678 | 2.1966924  |



## Me\_CO2Et\_RHS\_SM (10i)

Spartan'10, G = -891.796469, iv = none

Gaussian'09: B3LYP/6-31G\*, G = -891.805001, iv = none

Gaussian'09: M05-2X/6-31G\*, G = -891.739337, iv = none

Cartesian Coordinates (Angstroms)

| Atom     | X          | Y          | Z          |
|----------|------------|------------|------------|
| 1 H H1   | 1.0446575  | 2.2529926  | 0.3038655  |
| 2 C C1   | 0.6803316  | 2.4282900  | 1.3133353  |
| 3 C C4   | -0.2625032 | 2.8772000  | 3.8951227  |
| 4 C C2   | 0.2451012  | 1.3409889  | 2.0855825  |
| 5 C C6   | 0.6461051  | 3.7238963  | 1.8257449  |
| 6 C C5   | 0.1726455  | 3.9521526  | 3.1200901  |
| 7 C C3   | -0.2258138 | 1.5785692  | 3.3836570  |
| 8 H H6   | 0.9875777  | 4.5551942  | 1.2146256  |
| 9 H H5   | 0.1441892  | 4.9618900  | 3.5207809  |
| 10 H H3  | -0.5693807 | 0.7480578  | 3.9909839  |
| 11 H H4  | -0.6314050 | 3.0461543  | 4.9033250  |
| 12 C C7  | 0.3355870  | -0.0422941 | 1.5220763  |
| 13 C C8  | -0.6565510 | -1.1087543 | 1.7646985  |
| 14 C C9  | -0.6767509 | -0.5166698 | 0.3952902  |
| 15 H H2  | 1.3441159  | -0.4219058 | 1.3611400  |
| 16 H H9  | -1.4879302 | 0.1870095  | 0.2353990  |
| 17 F F1  | -1.7181082 | -0.8976478 | 2.5784862  |
| 18 F F2  | -0.2105188 | -2.3788247 | 1.9208703  |
| 19 C C10 | -0.1732717 | -1.2781974 | -0.7575398 |
| 20 H H8  | 0.5383231  | -2.0645695 | -0.5233232 |
| 21 C C11 | -0.5062844 | -1.0987494 | -2.0513345 |
| 22 C C12 | 0.0974987  | -1.9667538 | -3.1024499 |
| 23 O O1  | -0.1662135 | -1.8665359 | -4.2864012 |
| 24 O O2  | 0.9733092  | -2.8843421 | -2.6229824 |
| 25 C C13 | 1.5644962  | -3.7388047 | -3.6115307 |
| 26 H H7  | 2.2118431  | -4.4205317 | -3.0585095 |
| 27 H H11 | 2.1468352  | -3.1535082 | -4.3286787 |
| 28 H H12 | 0.7938764  | -4.2943522 | -4.1526963 |
| 29 C C14 | -1.4727345 | -0.0764040 | -2.5904011 |
| 30 H H10 | -0.9791214 | 0.5663472  | -3.3277598 |
| 31 H H13 | -1.8904669 | 0.5564653  | -1.8044602 |
| 32 H H14 | -2.2994382 | -0.5663625 | -3.1170062 |

## Me\_CO2Et\_RHS\_TS2 (TS2i)

Spartan'10: G = -891.751323, iv = i100, S<sup>2</sup> = 0.7421

Gaussian'09: B3LYP/6-31G\*, G = -891.756292, iv = i92, S<sup>2</sup> = 0.75

Gaussian'09: M05-2X/6-31G\*, G = -891.68717, iv = i70, S<sup>2</sup> = 0.91

### Cartesian Coordinates (Angstroms)

| Atom     | X          | Y          | Z          |
|----------|------------|------------|------------|
| 1 C C    | -0.7492316 | 2.8416276  | -0.6069933 |
| 2 C C2   | -1.8256500 | 2.0339074  | -0.4681444 |
| 3 C C3   | -1.8311064 | 0.7379227  | 0.1677036  |
| 4 C C4   | 0.6373249  | 2.3487772  | -0.3422518 |
| 5 C C5   | 0.8153452  | 0.9098674  | -0.7192309 |
| 6 H H    | -0.8360057 | 3.8517814  | -0.9954873 |
| 7 H H7   | -2.7673212 | 2.3486960  | -0.9174200 |
| 8 H H12  | 0.2552825  | 0.6281755  | -1.6035435 |
| 9 F F1   | 1.5256631  | 3.1226515  | -1.0794369 |
| 10 F F2  | 1.0038965  | 2.6003383  | 0.9844375  |
| 11 C C1  | 1.8685020  | 0.0389292  | -0.3180248 |
| 12 C C6  | 3.9090872  | -1.7988735 | 0.3628609  |
| 13 C C7  | 2.0633196  | -1.1621470 | -1.0576450 |
| 14 C C8  | 2.7324120  | 0.2773956  | 0.7875127  |
| 15 C C9  | 3.7319599  | -0.6297908 | 1.1116369  |
| 16 C C10 | 3.0667499  | -2.0588718 | -0.7258170 |
| 17 H H2  | 1.4142271  | -1.3625323 | -1.9066413 |
| 18 H H6  | 2.6102043  | 1.1790719  | 1.3722462  |
| 19 H H5  | 4.3820658  | -0.4266731 | 1.9585224  |
| 20 H H3  | 3.2014201  | -2.9617152 | -1.3153402 |
| 21 H H4  | 4.6952357  | -2.5015952 | 0.6247043  |
| 22 C C11 | -2.7852724 | -0.2244240 | -0.4164488 |
| 23 O O1  | -3.3895750 | -0.0539514 | -1.4651962 |
| 24 O O2  | -2.9290712 | -1.3403758 | 0.3432352  |
| 25 C C12 | -3.8551082 | -2.3092594 | -0.1659952 |
| 26 H H1  | -4.8430391 | -1.8615727 | -0.3058310 |
| 27 H H9  | -3.8935191 | -3.1006354 | 0.5838020  |
| 28 H H10 | -3.5102835 | -2.7061803 | -1.1254549 |
| 29 C C13 | -1.2696131 | 0.4568753  | 1.5383462  |
| 30 H H8  | -0.6997947 | -0.4782820 | 1.5628785  |
| 31 H H11 | -2.0971278 | 0.3325175  | 2.2523740  |
| 32 H H13 | -0.6309769 | 1.2683454  | 1.8846422  |

## Other Synthesised VCP Precursors

### Me Furan SM Trans (S9a)

G = -697.705753

iv = none

Cartesian Coordinates (Angstroms)

| Atom    | X          | Y          | Z          |
|---------|------------|------------|------------|
| 1 C C7  | 0.1406689  | -0.9956178 | 0.5964871  |
| 2 C C8  | 1.3872171  | -1.1047379 | 1.3823601  |
| 3 C C9  | 0.4327958  | -0.0392131 | 1.8146329  |
| 4 H H2  | -0.5882604 | -1.7749922 | 0.8259152  |
| 5 H H9  | 0.7063655  | 0.9810075  | 1.5644678  |
| 6 F F1  | 2.5620693  | -0.7294608 | 0.8469569  |
| 7 F F2  | 1.5578818  | -2.1889554 | 2.1726557  |
| 8 C C10 | -0.3889264 | -0.2021742 | 3.0432596  |
| 9 H H12 | -0.6630748 | -1.2485563 | 3.2963319  |
| 10 O O1 | -0.7568556 | 0.7285319  | 3.7269647  |
| 11 C C1 | 0.1434540  | -0.4465200 | -0.7726300 |
| 12 O O2 | 0.9128662  | -1.1269062 | -1.6855271 |
| 13 C C3 | 0.7601324  | -0.4932891 | -2.8790145 |
| 14 C C4 | -0.0823992 | 0.5655587  | -2.7531779 |
| 15 C C5 | -0.4971161 | 0.6019962  | -1.3757939 |
| 16 H H6 | 1.3135119  | -0.9125578 | -3.7057550 |
| 17 H H8 | -0.3834437 | 1.2479830  | -3.5367193 |
| 18 C C2 | -1.4470105 | 1.5859241  | -0.7584351 |
| 19 H H1 | -1.0728967 | 2.6131767  | -0.8500036 |
| 20 H H3 | -1.6130408 | 1.3840237  | 0.3032771  |
| 21 H H4 | -2.4239387 | 1.5547792  | -1.2562526 |

### Me Furan SM cis (S9b)

G = -697.706140

iv = none

Cartesian Coordinates (Angstroms)

| Atom    | X          | Y          | Z          |
|---------|------------|------------|------------|
| 1 C C7  | 0.7390908  | 0.3844384  | -1.0657176 |
| 2 C C8  | 1.6688781  | -0.7588474 | -0.9599335 |
| 3 C C9  | 2.1938189  | 0.5450926  | -0.4611973 |
| 4 H H9  | 2.9086128  | 1.0603466  | -1.0954608 |
| 5 F F1  | 2.1952401  | -1.2833724 | -2.0859645 |
| 6 F F2  | 1.4154475  | -1.7446922 | -0.0696108 |
| 7 C C10 | 2.3730149  | 0.7819041  | 0.9998585  |
| 8 H H12 | 1.6535859  | 0.2669332  | 1.6659712  |
| 9 O O1  | 3.2535027  | 1.4874759  | 1.4429023  |
| 10 C C1 | -0.4487462 | 0.5029065  | -0.1991059 |
| 11 O O2 | -0.6162882 | 1.7157256  | 0.4288353  |
| 12 C C3 | -1.7758070 | 1.6365772  | 1.1365563  |
| 13 C C4 | -2.3502310 | 0.4161752  | 0.9749909  |
| 14 C C5 | -1.4901531 | -0.3344543 | 0.0984126  |

|    |   |    |            |            |            |
|----|---|----|------------|------------|------------|
| 15 | H | H6 | -2.0449353 | 2.5206780  | 1.6946725  |
| 16 | H | H8 | -3.2754549 | 0.0746172  | 1.4194284  |
| 17 | C | C2 | -1.7172756 | -1.7403138 | -0.3741531 |
| 18 | H | H1 | -1.6172550 | -2.4576887 | 0.4494956  |
| 19 | H | H3 | -1.0063412 | -2.0322880 | -1.1511297 |
| 20 | H | H4 | -2.7278852 | -1.8545588 | -0.7834508 |
| 21 | H | H5 | 0.6691809  | 0.8133453  | -2.0653994 |

### Me Furan [3,3]-TS (TS3)

G = -697.672991

iv = i309

Cartesian Coordinates (Angstroms)

| Atom | X | Y   | Z          |            |            |
|------|---|-----|------------|------------|------------|
| 1    | C | C1  | -0.9655277 | -0.1281625 | 0.5395914  |
| 2    | C | C2  | 0.3919177  | 0.1289556  | 0.9945501  |
| 3    | C | C5  | 0.2274272  | 0.8396342  | -1.9004649 |
| 4    | H | H7  | 0.1609263  | 1.7533491  | -2.5101504 |
| 5    | O | O1  | -0.8684853 | 0.4606492  | -1.3383232 |
| 6    | C | C3  | 1.4773684  | 0.2600752  | -1.8088386 |
| 7    | C | C4  | 1.6018603  | -0.1920409 | 0.4785488  |
| 8    | C | C11 | 1.8373657  | -0.8215650 | -0.8598650 |
| 9    | H | H2  | 2.3096381  | 0.7303558  | -2.3220689 |
| 10   | H | H10 | 2.4830843  | 0.2571453  | 0.9257838  |
| 11   | F | F1  | 1.1678797  | -2.0112550 | -1.0464222 |
| 12   | F | F2  | 3.1739584  | -1.1193241 | -0.9750310 |
| 13   | O | O3  | 0.3647330  | 1.1247164  | 1.9796098  |
| 14   | C | C8  | -0.9295091 | 1.5043356  | 2.1026746  |
| 15   | H | H12 | -1.1124427 | 2.2748555  | 2.8394582  |
| 16   | C | C7  | -1.7628534 | 0.8250046  | 1.2825503  |
| 17   | H | H11 | -2.8371378 | 0.9257828  | 1.2236656  |
| 18   | C | C9  | -1.5565897 | -1.4572627 | 0.1605722  |
| 19   | H | H3  | -0.8663429 | -2.0669327 | -0.4148454 |
| 20   | H | H4  | -2.4636009 | -1.2919639 | -0.4275625 |
| 21   | H | H9  | -1.8336694 | -1.9963523 | 1.0765677  |

### Me Furan VCPR Ts (use NODISS keyword) (TS4)

G = -697.665879

iv = i234

S<sup>2</sup> = 0.29

Cartesian Coordinates (Angstroms)

| Atom | X | Y   | Z          |            |            |
|------|---|-----|------------|------------|------------|
| 1    | C | C   | -1.4362337 | 2.2538247  | -1.3566871 |
| 2    | C | C2  | -2.5135153 | 1.5219083  | -1.8423498 |
| 3    | C | C4  | -0.5217870 | 1.5210494  | -0.4698253 |
| 4    | C | C5  | -0.3577867 | 0.0914781  | -0.9001564 |
| 5    | H | H   | -1.2556072 | 3.2975305  | -1.5802847 |
| 6    | H | H12 | -0.6239173 | -0.1605270 | -1.9144912 |
| 7    | F | F1  | 0.7415242  | 2.1148315  | -0.4410394 |
| 8    | F | F2  | -0.9294237 | 1.5682960  | 0.8718760  |

|    |   |     |            |            |            |
|----|---|-----|------------|------------|------------|
| 9  | H | H14 | -3.1555660 | 1.9765040  | -2.6177622 |
| 10 | O | O1  | -2.7358741 | 0.3260619  | -1.4868078 |
| 11 | C | C1  | 0.3479232  | -0.8708234 | -0.1989309 |
| 12 | O | O2  | 0.4898193  | -2.0924328 | -0.8613604 |
| 13 | C | C6  | 1.1870195  | -2.9027068 | -0.0585477 |
| 14 | C | C7  | 1.5357917  | -2.2711910 | 1.1116651  |
| 15 | C | C8  | 1.0070982  | -0.9638114 | 1.0508234  |
| 16 | H | H5  | 1.3664614  | -3.9011673 | -0.4315501 |
| 17 | H | H7  | 2.1094802  | -2.6960812 | 1.9238066  |
| 18 | C | C3  | 1.1627819  | 0.0895214  | 2.0983756  |
| 19 | H | H2  | 1.9011221  | -0.2221925 | 2.8422719  |
| 20 | H | H3  | 0.2090776  | 0.2796994  | 2.6039992  |
| 21 | H | H4  | 1.4716117  | 1.0402281  | 1.6569753  |

### Non-Fluoro-SM trans (47a)

Spartan'10: G = -654.027526, iv = none

Gaussian'09: B3LYP/6-31G\*, G = -654.032624, iv = none

Gaussian'09: M05-2X/6-31G\*, G = -653.968582, iv = none

Cartesian Coordinates (Angstroms)

| Atom     | X          | Y          | Z          |
|----------|------------|------------|------------|
| 1 H H1   | 2.4558148  | 1.9664977  | 1.3490937  |
| 2 C C1   | 1.5137206  | 2.2423943  | 1.8174568  |
| 3 C C4   | -0.8907964 | 2.9604966  | 3.0162407  |
| 4 C C2   | 0.4921939  | 1.2865397  | 1.9171313  |
| 5 C C6   | 1.3395373  | 3.5362157  | 2.3087436  |
| 6 C C5   | 0.1349941  | 3.9019932  | 2.9103722  |
| 7 C C3   | -0.7135294 | 1.6673011  | 2.5267193  |
| 8 H H6   | 2.1472528  | 4.2581074  | 2.2200627  |
| 9 H H5   | -0.0036711 | 4.9091323  | 3.2937697  |
| 10 H H3  | -1.5254456 | 0.9506187  | 2.6227930  |
| 11 H H4  | -1.8335371 | 3.2322952  | 3.4841012  |
| 12 C C7  | 0.7180306  | -0.0812305 | 1.3680533  |
| 13 C C8  | 0.0127924  | -1.3021650 | 1.8856731  |
| 14 C C9  | -0.3721006 | -0.7724019 | 0.5197991  |
| 15 H H2  | 1.7317359  | -0.2449302 | 1.0093980  |
| 16 H H9  | -1.3118509 | -0.2275742 | 0.4625525  |
| 17 C C10 | 0.0192075  | -1.4923450 | -0.6960636 |
| 18 H H8  | 0.9411453  | -2.0733622 | -0.6593643 |
| 19 C C11 | -0.6623738 | -1.4863038 | -1.8532113 |
| 20 H H10 | -1.5889776 | -0.9328562 | -1.9759883 |
| 21 C C12 | -0.1648266 | -2.2407264 | -3.0192128 |
| 22 O O1  | 0.8483886  | -2.9142415 | -3.0597069 |
| 23 O O2  | -0.9984269 | -2.0894137 | -4.0801680 |
| 24 C C13 | -0.6046241 | -2.7846876 | -5.2704153 |
| 25 H H7  | -1.3671695 | -2.5496443 | -6.0140814 |
| 26 H H11 | -0.5623012 | -3.8628738 | -5.0915100 |
| 27 H H12 | 0.3786244  | -2.4463030 | -5.6097971 |
| 28 H H13 | -0.7063055 | -1.1776952 | 2.6905673  |
| 29 H H14 | 0.5724986  | -2.2328375 | 1.9269918  |

### Non-Fluoro-SM cis (47b)

Spartan'10: G = -654.024790, iv = none

Gaussian'09: B3LYP/6-31G\*, -654.030414, iv = none

Gaussian'09: M06-2X/6-31G\*, -653.744967, iv = none

#### Cartesian Coordinates (Angstroms)

| Atom     | X          | Y          | Z          |
|----------|------------|------------|------------|
| 1 H H1   | -0.2542662 | 2.2915662  | -0.5021848 |
| 2 C C1   | 0.7344812  | 2.1645972  | -0.0684421 |
| 3 C C4   | 3.2703973  | 1.8162921  | 1.0317255  |
| 4 C C2   | 0.8557636  | 1.5844524  | 1.2029998  |
| 5 C C6   | 1.8639337  | 2.5634010  | -0.7812665 |
| 6 C C5   | 3.1369438  | 2.3904917  | -0.2325234 |
| 7 C C3   | 2.1367416  | 1.4171786  | 1.7429408  |
| 8 H H6   | 1.7515622  | 3.0044603  | -1.7682719 |
| 9 H H5   | 4.0179587  | 2.6984646  | -0.7892128 |
| 10 H H3  | 2.2450075  | 0.9756370  | 2.7302087  |
| 11 H H4  | 4.2566489  | 1.6773723  | 1.4669251  |
| 12 C C7  | -0.3721506 | 1.2032446  | 1.9764382  |
| 13 C C8  | -0.4452043 | -0.0400410 | 2.8065827  |
| 14 C C9  | -1.2889387 | 0.0486890  | 1.5393170  |
| 15 H H9  | -2.3527386 | 0.2234564  | 1.6844538  |
| 16 C C10 | -0.9508286 | -0.7867763 | 0.3807042  |
| 17 H H8  | 0.1013634  | -1.0033740 | 0.2018760  |
| 18 C C11 | -1.8446828 | -1.3043687 | -0.4777387 |
| 19 H H10 | -2.9127551 | -1.1332973 | -0.3753246 |
| 20 C C12 | -1.4011137 | -2.1362181 | -1.6124187 |
| 21 O O1  | -0.2530060 | -2.4438418 | -1.8737535 |
| 22 O O2  | -2.4635381 | -2.5336285 | -2.3607591 |
| 23 C C13 | -2.1367419 | -3.3489422 | -3.4935561 |
| 24 H H7  | -1.6065193 | -4.2521592 | -3.1792809 |
| 25 H H11 | -1.5049799 | -2.7981740 | -4.1966114 |
| 26 H H12 | -3.0903901 | -3.6047972 | -3.9573000 |
| 27 H H13 | -0.9306797 | 2.0551654  | 2.3645298  |
| 28 H H2  | -0.9651543 | -0.0097442 | 3.7598570  |
| 29 H H14 | 0.4028861  | -0.7191062 | 2.7800860  |

### non-fluoro-VCPR TS trans (TS5a)

Spartan'10: -653.972598, iv = i236, S<sup>2</sup> = 0.7146

Gaussian'09: B3LYP/6-31G\*, G = -653.976701, iv = i246, S<sup>2</sup> = 0.73

Gaussian'09: M05-2X/6-31+G\*, G = -653.90781, iv = i262, S<sup>2</sup> = 0.84

#### Cartesian Coordinates (Angstroms)

| Atom   | X          | Y         | Z          |
|--------|------------|-----------|------------|
| 1 C C  | -0.8222470 | 3.0250060 | -0.4539541 |
| 2 C C2 | -1.9052459 | 2.2106773 | -0.3804376 |
| 3 C C3 | -1.7973923 | 0.8903636 | 0.1578220  |
| 4 C C4 | 0.5337323  | 2.4619301 | -0.0897511 |
| 5 C C5 | 0.6885928  | 1.0683410 | -0.6550086 |
| 6 H H  | -0.9020935 | 4.0478346 | -0.8109030 |

|    |   |     |            |            |            |
|----|---|-----|------------|------------|------------|
| 7  | H | H7  | -2.8638439 | 2.5116103  | -0.7984342 |
| 8  | H | H8  | -1.1422527 | 0.6749249  | 0.9926968  |
| 9  | H | H12 | 0.2525740  | 0.9082878  | -1.6370826 |
| 10 | C | C1  | 1.6275974  | 0.0969890  | -0.1977950 |
| 11 | C | C6  | 3.4438317  | -1.9011993 | 0.6552119  |
| 12 | C | C7  | 1.7957586  | -1.1120289 | -0.9276113 |
| 13 | C | C8  | 2.4099294  | 0.2652341  | 0.9762530  |
| 14 | C | C9  | 3.2978055  | -0.7199932 | 1.3906673  |
| 15 | C | C10 | 2.6850935  | -2.0892635 | -0.5080156 |
| 16 | H | H2  | 1.2071244  | -1.2629430 | -1.8294584 |
| 17 | H | H6  | 2.3250788  | 1.1801860  | 1.5546033  |
| 18 | H | H5  | 3.8876218  | -0.5662147 | 2.2907224  |
| 19 | H | H3  | 2.7948555  | -3.0029020 | -1.0863701 |
| 20 | H | H4  | 4.1438640  | -2.6655275 | 0.9811905  |
| 21 | C | C11 | -2.7745767 | -0.1316268 | -0.2028367 |
| 22 | O | O1  | -3.6664012 | -0.0019144 | -1.0287858 |
| 23 | O | O2  | -2.5783681 | -1.2815095 | 0.5006099  |
| 24 | C | C12 | -3.4934341 | -2.3395480 | 0.1952483  |
| 25 | H | H1  | -4.5241878 | -2.0317324 | 0.3947253  |
| 26 | H | H9  | -3.2103695 | -3.1704373 | 0.8431085  |
| 27 | H | H10 | -3.4145251 | -2.6308234 | -0.8566405 |
| 28 | H | H11 | 1.3311852  | 3.1187271  | -0.4745862 |
| 29 | H | H13 | 0.6702929  | 2.4475518  | 1.0048117  |

### non-fluoro-VCPR TS cis (TS5b)

Spartan'10:

G = -654.971681,

iv = i237,

S<sup>2</sup> = 0.7337

Cartesian Coordinates (Angstroms)

| Atom     | X          | Y          | Z          |
|----------|------------|------------|------------|
| 1 C C    | 0.2453010  | 2.5048609  | 1.2953703  |
| 2 C C2   | -0.8039811 | 1.7101068  | 1.6249380  |
| 3 C C3   | -0.6682026 | 0.3122649  | 1.8687047  |
| 4 C C4   | 1.6121357  | 1.9196713  | 0.9916982  |
| 5 C C5   | 1.5785997  | 0.5091379  | 0.4474431  |
| 6 H H    | 0.1262525  | 3.5838445  | 1.2259920  |
| 7 H H7   | -1.8111301 | 2.1230173  | 1.6485146  |
| 8 H H8   | 0.1915083  | -0.0898749 | 2.3880552  |
| 9 C C11  | -1.8097139 | -0.5797378 | 1.6968693  |
| 10 O O1  | -2.9124260 | -0.2548200 | 1.2832605  |
| 11 O O2  | -1.5012132 | -1.8571654 | 2.0611001  |
| 12 C C12 | -2.5659716 | -2.8020317 | 1.9057740  |
| 13 H H1  | -3.4406680 | -2.5021625 | 2.4904006  |
| 14 H H9  | -2.1715884 | -3.7530990 | 2.2671430  |
| 15 H H10 | -2.8605324 | -2.8857106 | 0.8549572  |
| 16 H H11 | 2.1336028  | 2.5856755  | 0.2877626  |
| 17 H H13 | 2.2259734  | 1.9238677  | 1.9062310  |
| 18 H H16 | 2.0380922  | -0.2751250 | 1.0425867  |
| 19 C C1  | 1.2934012  | 0.1999010  | -0.9135336 |
| 20 C C6  | 0.6974007  | -0.4795327 | -3.5935287 |
| 21 C C7  | 0.8119491  | 1.1739275  | -1.8285683 |

|    |   |     |           |            |            |
|----|---|-----|-----------|------------|------------|
| 22 | C | C8  | 1.4690232 | -1.1260625 | -1.3953192 |
| 23 | C | C9  | 1.1765396 | -1.4563796 | -2.7094170 |
| 24 | C | C10 | 0.5172298 | 0.8326852  | -3.1429608 |
| 25 | H | H2  | 0.6605875 | 2.1940342  | -1.4909004 |
| 26 | H | H6  | 1.8339548 | -1.8874860 | -0.7099350 |
| 27 | H | H5  | 1.3199579 | -2.4769201 | -3.0548471 |
| 28 | H | H3  | 0.1450793 | 1.5932011  | -3.8244866 |
| 29 | H | H4  | 0.4688384 | -0.7400881 | -4.6233044 |

### non fluoro VCP- [3,3] TS (S-TS13)

Spartan'10 G = -653.971614, iv = i403

Gaussian'09: B3LYP/6-31G\*, -653.973922, iv = i403

Gaussian'09: M06-2X/6-31G\*, -653.686835, iv = i400

#### Cartesian Coordinates (Angstroms)

|    | Atom  | X          | Y          | Z          |
|----|-------|------------|------------|------------|
| 1  | C C1  | -0.0894029 | -0.6486226 | 0.8616396  |
| 2  | H H3  | -0.2343972 | -1.7199948 | 0.7606184  |
| 3  | C C2  | 1.2368519  | -0.2540877 | 1.3416020  |
| 4  | C C5  | 1.2386251  | -0.1502183 | -1.6576682 |
| 5  | H H7  | 1.3283122  | 0.7889579  | -2.1995328 |
| 6  | C C6  | -0.0737839 | -0.5112904 | -1.2033351 |
| 7  | H H6  | -0.3526574 | -1.5564982 | -1.2871950 |
| 8  | C C7  | 1.3398635  | 0.9153519  | 2.1770254  |
| 9  | H H4  | 2.3328995  | 1.2425020  | 2.4775117  |
| 10 | C C8  | 0.2341933  | 1.6054176  | 2.5757404  |
| 11 | H H9  | 0.3352882  | 2.4889856  | 3.1999974  |
| 12 | C C9  | -1.0757048 | 1.1624901  | 2.1900805  |
| 13 | H H11 | -1.9457203 | 1.6985261  | 2.5607054  |
| 14 | C C10 | -1.2329787 | 0.0613238  | 1.4049207  |
| 15 | H H12 | -2.2246786 | -0.2981886 | 1.1479309  |
| 16 | C C3  | 2.3703942  | -0.8199918 | -1.2934753 |
| 17 | C C4  | 2.3739013  | -0.8979018 | 0.8956232  |
| 18 | C C11 | 2.3917636  | -1.8913224 | -0.2310380 |
| 19 | H H2  | 3.3360345  | -0.4478167 | -1.6272447 |
| 20 | H H10 | 3.3402224  | -0.5319360 | 1.2370583  |
| 21 | C C12 | -1.1691115 | 0.4082697  | -1.6053860 |
| 22 | O O1  | -1.0412943 | 1.5755153  | -1.9183351 |
| 23 | O O2  | -2.3775113 | -0.2147373 | -1.5535430 |
| 24 | C C13 | -3.5017889 | 0.6153777  | -1.8776802 |
| 25 | H H1  | -3.4106571 | 1.0103859  | -2.8931257 |
| 26 | H H5  | -3.5750941 | 1.4536613  | -1.1791992 |
| 27 | H H8  | -4.3774856 | -0.0300456 | -1.7958804 |
| 28 | H H13 | 3.3004002  | -2.4970704 | -0.2515753 |
| 29 | H H14 | 1.5235165  | -2.5570425 | -0.2562403 |



## piperonyl cis SM (48)

Spartan'10: G = -1041.02078, iv = none

Gaussian'09: B3LYP/6-31G\* G = -1041.028189, iv = none

Gaussian'09: M06-2X/6-31G\* G = -1040.629122, iv = none

| Cartesian Coordinates (Angstroms) |       |            |            |            |
|-----------------------------------|-------|------------|------------|------------|
|                                   | Atom  | X          | Y          | Z          |
| -----                             |       |            |            |            |
| 1                                 | C C1  | 3.0423844  | -0.2086799 | 0.8498853  |
| 2                                 | C C2  | 1.9712958  | 0.6511022  | 1.3910393  |
| 3                                 | C C3  | 1.8273286  | -0.9333291 | 1.3301227  |
| 4                                 | H H6  | 1.9311472  | -1.4268921 | 2.2931801  |
| 5                                 | C C10 | 0.9105989  | -1.5575832 | 0.3680707  |
| 6                                 | H H11 | 0.8299722  | -1.1099408 | -0.6198009 |
| 7                                 | C C11 | 0.1704137  | -2.6453405 | 0.6293754  |
| 8                                 | H H12 | 0.1962986  | -3.1500943 | 1.5910290  |
| 9                                 | C C12 | -0.7183097 | -3.2114163 | -0.4070501 |
| 10                                | O O1  | -0.8667601 | -2.7810948 | -1.5347917 |
| 11                                | O O2  | -1.3693752 | -4.3033018 | 0.0663863  |
| 12                                | C C13 | -2.2558576 | -4.9350251 | -0.8680243 |
| 13                                | H H5  | -3.0221314 | -4.2329708 | -1.2081799 |
| 14                                | H H13 | -2.7091715 | -5.7665514 | -0.3271395 |
| 15                                | H H14 | -1.7017856 | -5.2994578 | -1.7376918 |
| 16                                | F F1  | 3.3167039  | -0.2109170 | -0.4764377 |
| 17                                | F F2  | 4.1926516  | -0.3416594 | 1.5506246  |
| 18                                | C C4  | 1.1090415  | 1.5624446  | 0.5757094  |
| 19                                | C C5  | 0.8036928  | 3.1156355  | -1.2954926 |
| 20                                | C C6  | -0.9956292 | 2.6403948  | 0.2548302  |
| 21                                | C C7  | -0.4946950 | 3.2982780  | -0.8682452 |
| 22                                | C C9  | 1.6034720  | 2.2303373  | -0.5494306 |
| 23                                | H H1  | 1.1902327  | 3.6322954  | -2.1670758 |
| 24                                | H H4  | 2.6255347  | 2.0574505  | -0.8640583 |
| 25                                | C C8  | -0.2261551 | 1.7713216  | 0.9962538  |
| 26                                | H H2  | 2.1680653  | 0.9832609  | 2.4097456  |
| 27                                | H H3  | -0.6311615 | 1.2628101  | 1.8648840  |
| 28                                | O O3  | -2.2980178 | 3.0223465  | 0.4704360  |
| 29                                | O O4  | -1.4650229 | 4.1142322  | -1.3960229 |
| 30                                | C C14 | -2.6615555 | 3.8075867  | -0.6710824 |
| 31                                | H H7  | -3.1330517 | 4.7362777  | -0.3381130 |
| 32                                | H H10 | -3.3401538 | 3.2284802  | -1.3129356 |

## piperonyl [3,3]-TS - actual product (TS6a)

Spartan'10: G = -1040.98573, iv = i345

Gaussian'09: B3LYP/6-31G\* G = -1040.990095, iv = i346

Gaussian'09: M06-2X/6-31G\* G = -1040.586048, iv = i403

### Cartesian Coordinates (Angstroms)

| Atom     | X          | Y          | Z          |
|----------|------------|------------|------------|
| 1 C C1   | 0.0299913  | -0.9765097 | 0.5447855  |
| 2 H H3   | -0.0919916 | -2.0411956 | 0.4137142  |
| 3 C C2   | 1.3614143  | -0.5751782 | 1.0108108  |
| 4 C C5   | 1.3636871  | -0.5111860 | -2.0543037 |
| 5 H H7   | 1.4537369  | 0.4091006  | -2.6287065 |
| 6 C C6   | 0.0517463  | -0.8483121 | -1.5978248 |
| 7 H H6   | -0.2395078 | -1.8891689 | -1.6318160 |
| 8 C C7   | 1.4922535  | 0.5993397  | 1.8477715  |
| 9 H H4   | 2.4728296  | 0.9436762  | 2.1581912  |
| 10 C C8  | 0.3628135  | 1.2572276  | 2.2002409  |
| 11 C C9  | -0.9392342 | 0.8221317  | 1.8038003  |
| 12 C C10 | -1.1381880 | -0.2826499 | 1.0474906  |
| 13 H H12 | -2.1309181 | -0.6337514 | 0.7940555  |
| 14 C C3  | 2.5066100  | -1.1683158 | -1.7020673 |
| 15 C C4  | 2.5020439  | -1.2262617 | 0.5869547  |
| 16 C C11 | 2.5903161  | -2.1494753 | -0.5812988 |
| 17 H H2  | 3.4711995  | -0.8224478 | -2.0616157 |
| 18 H H10 | 3.4706018  | -0.8816310 | 0.9385686  |
| 19 C C12 | -1.0242132 | 0.1017440  | -1.9670565 |
| 20 O O1  | -0.8665404 | 1.2683970  | -2.2727871 |
| 21 O O2  | -2.2473210 | -0.4856953 | -1.8957493 |
| 22 C C13 | -3.3538526 | 0.3761447  | -2.2020706 |
| 23 H H1  | -3.2688036 | 0.7645485  | -3.2204452 |
| 24 H H5  | -3.3906132 | 1.2179722  | -1.5049668 |
| 25 H H8  | -4.2456265 | -0.2439745 | -2.1027276 |
| 26 F F1  | 1.6195434  | -3.1315895 | -0.6096091 |
| 27 F F2  | 3.8003624  | -2.7946598 | -0.5875743 |
| 28 O O3  | -1.8708063 | 1.6633345  | 2.3447234  |
| 29 O O4  | 0.2406542  | 2.3885294  | 2.9577602  |
| 30 C C14 | -1.1582213 | 2.6450504  | 3.1015459  |
| 31 H H9  | -1.3866334 | 3.6423907  | 2.7120647  |
| 32 H H13 | -1.4373328 | 2.5624154  | 4.1581412  |

## piperonyl [3,3] -TS - alternative regioisomer (TS6b)

Spartan'10: G = -1040.97722

iv = i380

Cartesian Coordinates (Angstroms)

|    | Atom  | X          | Y          | Z          |
|----|-------|------------|------------|------------|
| 1  | C C1  | 0.2385885  | -0.7298865 | 0.7224743  |
| 2  | H H3  | 0.0276832  | -1.7842292 | 0.6037600  |
| 3  | C C2  | 1.5951995  | -0.4027051 | 1.2177965  |
| 4  | C C5  | 1.4721330  | -0.1108453 | -1.8181119 |
| 5  | H H7  | 1.5045379  | 0.8562664  | -2.3158420 |
| 6  | C C6  | 0.1974816  | -0.5696510 | -1.3534490 |
| 7  | H H6  | 0.0086455  | -1.6282209 | -1.4642294 |
| 8  | C C7  | 1.7716717  | 0.6741291  | 2.1666199  |
| 9  | H H4  | 2.7859233  | 0.9105927  | 2.4746075  |
| 10 | C C8  | 0.7251018  | 1.4116844  | 2.6504553  |
| 11 | H H9  | 0.8673343  | 2.2246265  | 3.3541622  |
| 12 | C C9  | -0.5691163 | 1.0800378  | 2.1831251  |
| 13 | C C10 | -0.7933501 | 0.0582918  | 1.3159113  |
| 14 | C C3  | 2.6474765  | -0.7549716 | -1.5599684 |
| 15 | C C4  | 2.7220531  | -1.0155180 | 0.7105452  |
| 16 | C C11 | 2.7866601  | -1.8315684 | -0.5349616 |
| 17 | H H2  | 3.5910266  | -0.3508489 | -1.9139038 |
| 18 | H H10 | 3.6972904  | -0.7160370 | 1.0845140  |
| 19 | C C12 | -0.9732522 | 0.2802463  | -1.6932325 |
| 20 | O O1  | -0.9832406 | 1.4969908  | -1.6931776 |
| 21 | O O2  | -2.0514151 | -0.4793664 | -1.9984359 |
| 22 | C C13 | -3.2456076 | 0.2469918  | -2.3140927 |
| 23 | H H1  | -3.0876808 | 0.8904759  | -3.1847093 |
| 24 | H H5  | -3.5544741 | 0.8660227  | -1.4670107 |
| 25 | H H8  | -4.0017662 | -0.5095511 | -2.5281664 |
| 26 | F F1  | 1.8295525  | -2.8240916 | -0.6069984 |
| 27 | F F2  | 4.0040881  | -2.4515217 | -0.6373763 |
| 28 | O O3  | -2.1500850 | -0.1133524 | 1.1274261  |
| 29 | O O4  | -1.7631087 | 1.6229029  | 2.6040112  |
| 30 | C C14 | -2.7287256 | 1.0660126  | 1.7046521  |
| 31 | H H12 | -2.9406554 | 1.7919193  | 0.9059492  |
| 32 | H H14 | -3.6299698 | 0.7951741  | 2.2576566  |

## Isodesmic Compounds (Energies can be found in Table S16-S19)

Ethane

Cartesian Coordinates (Angstroms)

| Atom   | X          | Y          | Z          |
|--------|------------|------------|------------|
| 1 C C1 | 0.0000001  | 0.0000000  | 0.7637754  |
| 2 H H2 | 1.0121266  | -0.0000001 | 1.1565569  |
| 3 H H3 | -0.5060633 | -0.8765272 | 1.1565570  |
| 4 H H4 | -0.5060631 | 0.8765274  | 1.1565570  |
| 5 C C2 | -0.0000001 | 0.0000000  | -0.7637754 |
| 6 H H1 | 0.5060631  | -0.8765274 | -1.1565570 |
| 7 H H5 | 0.5060633  | 0.8765272  | -1.1565570 |
| 8 H H6 | -1.0121266 | 0.0000001  | -1.1565569 |

Ethene

Cartesian Coordinates (Angstroms)

| Atom   | X         | Y          | Z          |
|--------|-----------|------------|------------|
| 1 C C1 | 0.0000000 | 0.0000000  | 0.6585346  |
| 2 H H2 | 0.0000000 | 0.9144843  | 1.2256492  |
| 3 H H3 | 0.0000000 | -0.9144843 | 1.2256492  |
| 4 C C2 | 0.0000000 | 0.0000000  | -0.6585346 |
| 5 H H1 | 0.0000000 | -0.9144843 | -1.2256492 |
| 6 H H4 | 0.0000000 | 0.9144843  | -1.2256492 |

Benzene

Cartesian Coordinates (Angstroms)

| Atom    | X         | Y          | Z          |
|---------|-----------|------------|------------|
| 1 H H1  | 0.0000000 | 0.0000000  | -2.4836029 |
| 2 C C1  | 0.0000000 | -0.0000001 | -1.3965320 |
| 3 C C4  | 0.0000000 | -0.0000001 | 1.3965320  |
| 4 C C2  | 0.0000000 | -1.2095560 | -0.6982739 |
| 5 C C6  | 0.0000000 | 1.2095560  | -0.6982740 |
| 6 C C5  | 0.0000000 | 1.2095560  | 0.6982740  |
| 7 C C3  | 0.0000000 | -1.2095560 | 0.6982739  |
| 8 H H2  | 0.0000000 | -2.1508686 | -1.2419479 |
| 9 H H6  | 0.0000000 | 2.1508686  | -1.2419480 |
| 10 H H5 | 0.0000000 | 2.1508686  | 1.2419480  |
| 11 H H3 | 0.0000000 | -2.1508686 | 1.2419480  |
| 12 H H4 | 0.0000000 | -0.0000001 | 2.4836029  |

## Benzene - reduced

## Cartesian Coordinates (Angstroms)

| Atom     | X          | Y          | Z          |
|----------|------------|------------|------------|
| 1 H H1   | 1.0881541  | -0.5985062 | -2.1761678 |
| 2 C C1   | 0.6434959  | -0.2310204 | -1.2671432 |
| 3 C C3   | 0.4539005  | 1.3985299  | 0.5292146  |
| 4 C C5   | -0.6486740 | -0.7877853 | 0.8245360  |
| 5 C C4   | -0.3680277 | 0.6386557  | 1.2368443  |
| 6 C C6   | -0.5413287 | -0.9731704 | -0.6936467 |
| 7 C C2   | 1.0859599  | 0.8801419  | -0.6985849 |
| 8 H H10  | 0.0680039  | -1.4397351 | 1.3250990  |
| 9 H H7   | -0.8121612 | 1.0069181  | 2.1458111  |
| 10 H H11 | -1.4473510 | -0.6014106 | -1.1733836 |
| 11 H H3  | 1.9051309  | 1.4317046  | -1.1264837 |
| 12 H H5  | 0.6856329  | 2.4020851  | 0.8415236  |
| 13 H H9  | -1.6321903 | -1.0961221 | 1.1650105  |
| 14 H H12 | -0.4805450 | -2.0302851 | -0.9326293 |

## Furan

## Cartesian Coordinates (Angstroms)

| Atom   | X          | Y          | Z          |
|--------|------------|------------|------------|
| 1 O O1 | 0.0506086  | -0.4485978 | -1.2845127 |
| 2 C C2 | 1.0978809  | -0.0928593 | -0.5216394 |
| 3 C C3 | 0.6907284  | 0.3010616  | 0.6916180  |
| 4 C C4 | -0.7447007 | 0.1773514  | 0.6782675  |
| 5 C C5 | -1.0559874 | -0.2784870 | -0.5416720 |
| 6 H H3 | 2.0606797  | -0.1735618 | -0.9770217 |
| 7 H H5 | 1.3099502  | 0.6364801  | 1.4975195  |
| 8 H H7 | -1.4269491 | 0.4006048  | 1.4720643  |
| 9 H H9 | -1.9822107 | -0.5219919 | -1.0146236 |

## Furan - reduced

## Cartesian Coordinates (Angstroms)

| Atom     | X          | Y          | Z          |
|----------|------------|------------|------------|
| 1 O O1   | 0.2823937  | -0.4458870 | -1.3684354 |
| 2 C C2   | 1.2687481  | 0.0829888  | -0.6101449 |
| 3 C C3   | 0.9192139  | 0.4245706  | 0.6106088  |
| 4 C C4   | -0.5396163 | 0.0842859  | 0.8071793  |
| 5 C C5   | -0.9272401 | -0.3714167 | -0.6179478 |
| 6 H H3   | 2.2210539  | 0.1535510  | -1.0962173 |
| 7 H H5   | 1.5638401  | 0.8469238  | 1.3544034  |
| 8 H H7   | -1.1345112 | 0.9320998  | 1.1315137  |
| 9 H H8   | -0.6786505 | -0.7048947 | 1.5411980  |
| 10 H H9  | -1.5783534 | 0.3422369  | -1.1071110 |
| 11 H H10 | -1.3968781 | -1.3444585 | -0.6450469 |

thiophene

Cartesian Coordinates (Angstroms)

| Atom   | X          | Y          | Z          |
|--------|------------|------------|------------|
| 1 S S1 | 0.1167444  | -0.7253040 | -1.5997346 |
| 2 C C2 | 1.2671448  | -0.1588718 | -0.4449549 |
| 3 C C3 | 0.6707684  | 0.3240820  | 0.6597454  |
| 4 C C4 | -0.7621015 | 0.2433484  | 0.5917821  |
| 5 C C5 | -1.1936835 | -0.2975247 | -0.5616759 |
| 6 H H3 | 2.3162648  | -0.2167911 | -0.6518827 |
| 7 H H5 | 1.2070897  | 0.7252313  | 1.4987648  |
| 8 H H7 | -1.4167593 | 0.5773933  | 1.3743115  |
| 9 H H9 | -2.2054677 | -0.4715633 | -0.8663556 |

thiophene -reduced

Cartesian Coordinates (Angstroms)

| Atom     | X          | Y          | Z          |
|----------|------------|------------|------------|
| 1 S S1   | 0.2381818  | -0.1586916 | -1.8476764 |
| 2 C C2   | 1.4343914  | 0.1554841  | -0.5805729 |
| 3 C C3   | 0.9357534  | 0.2978303  | 0.6304529  |
| 4 C C4   | -0.5698240 | 0.2147878  | 0.7144893  |
| 5 C C5   | -1.0420275 | -0.4756587 | -0.5772318 |
| 6 H H3   | 2.4697948  | 0.2300008  | -0.8513928 |
| 7 H H5   | 1.5396600  | 0.5097448  | 1.4940703  |
| 8 H H7   | -0.9878734 | 1.2166165  | 0.7920098  |
| 9 H H8   | -0.9060149 | -0.3384097 | 1.5853369  |
| 10 H H9  | -1.9954398 | -0.1062750 | -0.9266186 |
| 11 H H10 | -1.1166018 | -1.5454293 | -0.4328669 |

piperonyl

Cartesian Coordinates (Angstroms)

| Atom    | X          | Y          | Z          |
|---------|------------|------------|------------|
| 1 H H1  | -2.4890973 | 0.0000000  | 0.7605630  |
| 2 C C1  | -1.4155844 | 0.0000000  | 0.7735268  |
| 3 C C4  | 1.4155844  | 0.0000000  | 0.7735268  |
| 4 C C2  | -0.6905232 | 0.0000000  | -0.3841316 |
| 5 C C6  | -0.6899151 | 0.0000000  | 1.9718652  |
| 6 C C5  | 0.6899151  | 0.0000000  | 1.9718652  |
| 7 C C3  | 0.6905232  | 0.0000000  | -0.3841316 |
| 8 H H6  | -1.2223019 | 0.0000000  | 2.9054279  |
| 9 H H5  | 1.2223019  | 0.0000000  | 2.9054279  |
| 10 H H4 | 2.4890973  | 0.0000000  | 0.7605630  |
| 11 O O1 | -1.1369414 | 0.0000000  | -1.6665113 |
| 12 O O2 | 1.1369414  | 0.0000000  | -1.6665113 |
| 13 C C7 | 0.0000000  | 0.0000000  | -2.4974534 |
| 14 H H3 | 0.0000000  | -0.8891458 | -3.1120134 |
| 15 H H8 | 0.0000000  | 0.8891458  | -3.1120134 |

piperonyl reduced

Cartesian Coordinates (Angstroms)

| Atom     | X          | Y          | Z          |
|----------|------------|------------|------------|
| 1 H H1   | -2.5329374 | 0.0000000  | 0.4013201  |
| 2 C C1   | -1.4590576 | 0.0000000  | 0.4432548  |
| 3 C C3   | 0.7815602  | 0.0000000  | 1.7990097  |
| 4 C C5   | 0.7299606  | 0.0000000  | -0.6478620 |
| 5 C C4   | 1.4590576  | 0.0000000  | 0.4432548  |
| 6 C C6   | -0.7299606 | 0.0000000  | -0.6478620 |
| 7 C C2   | -0.7815602 | 0.0000000  | 1.7990097  |
| 8 H H6   | 1.1341868  | 0.8637486  | 2.3556278  |
| 9 H H7   | 2.5329374  | 0.0000000  | 0.4013201  |
| 10 H H3  | -1.1341868 | -0.8637486 | 2.3556278  |
| 11 H H5  | 1.1341868  | -0.8637486 | 2.3556278  |
| 12 H H4  | -1.1341868 | 0.8637486  | 2.3556278  |
| 13 O O1  | 1.1332016  | 0.0000000  | -1.9415502 |
| 14 O O2  | -1.1332016 | 0.0000000  | -1.9415502 |
| 15 C C7  | 0.0000000  | 0.0000000  | -2.7666606 |
| 16 H H12 | 0.0000000  | 0.8882923  | -3.3820978 |
| 17 H H13 | 0.0000000  | -0.8882923 | -3.3820978 |

pyrrole

Cartesian Coordinates (Angstroms)

| Atom    | X          | Y          | Z          |
|---------|------------|------------|------------|
| 1 C C1  | -0.4449852 | 1.0284683  | 0.3679170  |
| 2 H H2  | -0.8752591 | 1.9155106  | 0.8102523  |
| 3 C C2  | 0.0893702  | 0.8040222  | -0.8825847 |
| 4 H H4  | 0.1681822  | 1.5338806  | -1.6771450 |
| 5 N N1  | -0.3576710 | -0.1471977 | 1.0761889  |
| 6 H H3  | -0.6730776 | -0.2771132 | 2.0246473  |
| 7 C C3  | 0.2239280  | -1.1194084 | 0.2961859  |
| 8 H H6  | 0.3804864  | -2.1188340 | 0.6759902  |
| 9 C C4  | 0.5125838  | -0.5560907 | -0.9280150 |
| 10 H H5 | 0.9764424  | -1.0632377 | -1.7634369 |

pyridine

Cartesian Coordinates (Angstroms)

| Atom   | X         | Y          | Z          |
|--------|-----------|------------|------------|
| 1 H H1 | 0.0000000 | -0.0000007 | -2.2824770 |
| 2 C C1 | 0.0000000 | -0.0000003 | -1.1955420 |
| 3 N N1 | 0.0000000 | 0.0000004  | 1.6106501  |
| 4 C C2 | 0.0000000 | -1.1985966 | -0.4833139 |
| 5 C C6 | 0.0000000 | 1.1985963  | -0.4833146 |
| 6 C C5 | 0.0000000 | 1.1422376  | 0.9115526  |
| 7 C C3 | 0.0000000 | -1.1422371 | 0.9115532  |
| 8 H H2 | 0.0000000 | -2.1577589 | -0.9929579 |
| 9 H H6 | 0.0000000 | 2.1577583  | -0.9929590 |

|    |   |    |           |            |           |
|----|---|----|-----------|------------|-----------|
| 10 | H | H5 | 0.0000000 | 2.0597701  | 1.4984036 |
| 11 | H | H3 | 0.0000000 | -2.0597693 | 1.4984048 |

oxazole

Cartesian Coordinates (Angstroms)

|   | Atom  | X          | Y          | Z          |
|---|-------|------------|------------|------------|
| 1 | N N1  | -0.2423485 | -1.0732650 | -0.6256410 |
| 2 | C C2  | 0.9713989  | -0.7097296 | -0.3615412 |
| 3 | C C5  | -1.0233183 | -0.0579885 | -0.0804509 |
| 4 | H H4  | 1.8940387  | -1.2145675 | -0.6086099 |
| 5 | H H10 | -2.1019922 | -0.0783051 | -0.1413901 |
| 6 | O O1  | 1.0812771  | 0.4623778  | 0.3144037  |
| 7 | C C1  | -0.2161812 | 0.8710022  | 0.4885116  |
| 8 | H H2  | -0.3628746 | 1.8004756  | 1.0147178  |

isoxazole

Cartesian Coordinates (Angstroms)

|   | Atom | X          | Y          | Z          |
|---|------|------------|------------|------------|
| 1 | N N1 | -1.3579729 | -0.3166155 | 0.6680020  |
| 2 | O O1 | -0.9688970 | -1.0478468 | -0.4596005 |
| 3 | C C1 | -0.3749555 | 0.5260090  | 0.8839956  |
| 4 | H H3 | -0.4490582 | 1.2097088  | 1.7205650  |
| 5 | C C2 | 0.2337272  | -0.6094549 | -0.8719390 |
| 6 | H H4 | 0.6405663  | -1.1029212 | -1.7432137 |
| 7 | C C3 | 0.6770494  | 0.3923385  | -0.0660168 |
| 8 | H H5 | 1.5995407  | 0.9487822  | -0.1317926 |



## Remaining Species for Computational Prediction

### Ph cis SM (1b)

Spartan'10: G = -852.505870, iv = none

Gaussian'09: B3LYP/6-31G\*, G = -852.511692, iv = none

Gaussian'09: M06-2X/6-31G\*, G = -852.17197, iv = none

|       |     | Cartesian Coordinates (Angstroms) |            |            |
|-------|-----|-----------------------------------|------------|------------|
| Atom  |     | X                                 | Y          | Z          |
| ----- |     | -----                             | -----      | -----      |
| 1 H   | H1  | -0.2566781                        | 2.1773309  | -0.5418559 |
| 2 C   | C1  | 0.7326203                         | 2.1016848  | -0.0979338 |
| 3 C   | C4  | 3.2705797                         | 1.8884782  | 1.0330952  |
| 4 C   | C2  | 0.8683703                         | 1.5838354  | 1.1975351  |
| 5 C   | C6  | 1.8530942                         | 2.5100396  | -0.8195723 |
| 6 C   | C5  | 3.1260344                         | 2.4054202  | -0.2547015 |
| 7 C   | C3  | 2.1488322                         | 1.4797692  | 1.7561690  |
| 8 H   | H6  | 1.7326412                         | 2.9064500  | -1.8241942 |
| 9 H   | H5  | 3.9999792                         | 2.7221862  | -0.8173662 |
| 10 H  | H3  | 2.2673570                         | 1.0735024  | 2.7558601  |
| 11 H  | H4  | 4.2579709                         | 1.8001634  | 1.4782035  |
| 12 C  | C7  | -0.3508853                        | 1.2086657  | 1.9816477  |
| 13 C  | C8  | -0.4570777                        | -0.0224345 | 2.7885630  |
| 14 C  | C9  | -1.2947057                        | 0.0093460  | 1.5504614  |
| 15 H  | H9  | -2.3531250                        | 0.1988810  | 1.7111959  |
| 16 F  | F1  | -1.0722914                        | 0.0238570  | 3.9930383  |
| 17 F  | F2  | 0.5874286                         | -0.8816675 | 2.8417710  |
| 18 C  | C10 | -0.9504897                        | -0.8346112 | 0.3975477  |
| 19 H  | H8  | 0.0925116                         | -1.1108468 | 0.2613425  |
| 20 C  | C11 | -1.8431113                        | -1.2883794 | -0.4950921 |
| 21 H  | H10 | -2.9028398                        | -1.0588657 | -0.4270965 |
| 22 C  | C12 | -1.4068747                        | -2.1361501 | -1.6249384 |
| 23 O  | O1  | -0.2668900                        | -2.4927457 | -1.8526699 |
| 24 O  | O2  | -2.4647872                        | -2.4769771 | -2.4025691 |
| 25 C  | C13 | -2.1481186                        | -3.3039233 | -3.5313814 |
| 26 H  | H7  | -1.6796913                        | -4.2367585 | -3.2058806 |
| 27 H  | H11 | -1.4645918                        | -2.7848208 | -4.2092518 |
| 28 H  | H12 | -3.0995277                        | -3.5034504 | -4.0257970 |
| 29 H  | H13 | -0.9257341                        | 2.0420210  | 2.3838702  |

### Ph [3,3] - TS

Spartan'10: G = -852.464912, iv = i379

Gaussian'09: B3LYP/6-31G\*, G = -852.467339, iv = i380

Gaussian'09: M06-2X/6-31G\*, G = -852.124968, iv = i450

Cartesian Coordinates (Angstroms)

| Atom  |    | X          | Y          | Z         |
|-------|----|------------|------------|-----------|
| ----- |    | -----      | -----      | -----     |
| 1 C   | C1 | -0.1088780 | -0.6432231 | 0.8863613 |
| 2 H   | H3 | -0.2589437 | -1.7075866 | 0.7739837 |

|    |   |     |            |            |            |
|----|---|-----|------------|------------|------------|
| 3  | C | C2  | 1.2220184  | -0.2597465 | 1.3621125  |
| 4  | C | C5  | 1.2048982  | -0.1785670 | -1.6827749 |
| 5  | H | H7  | 1.2844671  | 0.7425621  | -2.2565575 |
| 6  | C | C6  | -0.1033175 | -0.5238935 | -1.2142480 |
| 7  | H | H6  | -0.3862752 | -1.5665343 | -1.2643495 |
| 8  | C | C7  | 1.3310470  | 0.9008674  | 2.2111675  |
| 9  | H | H4  | 2.3241582  | 1.2134430  | 2.5246042  |
| 10 | C | C8  | 0.2299951  | 1.6063232  | 2.5951180  |
| 11 | H | H9  | 0.3384265  | 2.4867706  | 3.2225007  |
| 12 | C | C9  | -1.0815962 | 1.1903990  | 2.1893254  |
| 13 | H | H11 | -1.9465638 | 1.7409931  | 2.5492119  |
| 14 | C | C10 | -1.2449905 | 0.0914736  | 1.4014086  |
| 15 | H | H12 | -2.2377005 | -0.2546742 | 1.1316479  |
| 16 | C | C3  | 2.3539553  | -0.8303083 | -1.3422934 |
| 17 | C | C4  | 2.3677107  | -0.9013675 | 0.9378646  |
| 18 | C | C11 | 2.4527866  | -1.8220421 | -0.2319275 |
| 19 | H | H2  | 3.3133015  | -0.4772245 | -1.7088463 |
| 20 | H | H10 | 3.3345269  | -0.5601096 | 1.2979552  |
| 21 | C | C12 | -1.1878915 | 0.4137056  | -1.6091269 |
| 22 | O | O1  | -1.0362810 | 1.5742628  | -1.9352174 |
| 23 | O | O2  | -2.4035180 | -0.1866668 | -1.5458552 |
| 24 | C | C13 | -3.5160485 | 0.6557767  | -1.8841186 |
| 25 | H | H1  | -3.4156713 | 1.0343754  | -2.9050867 |
| 26 | H | H5  | -3.5773554 | 1.5046847  | -1.1970147 |
| 27 | H | H8  | -4.4003348 | 0.0232509  | -1.7948402 |
| 28 | F | F1  | 1.4839922  | -2.8045753 | -0.2568552 |
| 29 | F | F2  | 3.6640819  | -2.4623688 | -0.2541494 |

### furan cis SM (cis-9b)

Spartan'10: G = -850.312391, iv = none

Gaussian'09: B3LYP/6-31G\*, G = -850.318011, iv = none

Gaussian'09: M06-2X/6-31G\*, G = -849.99051, iv = none

#### Cartesian Coordinates (Angstroms)

|    | Atom  | X          | Y          | Z          |
|----|-------|------------|------------|------------|
| 1  | C C1  | 2.4512641  | 1.3354068  | 0.2415934  |
| 2  | C C2  | 1.3356127  | 1.7987431  | 1.0906077  |
| 3  | C C3  | 1.6498298  | 0.2431782  | 0.8642397  |
| 4  | H H6  | 2.1119688  | -0.2326259 | 1.7254883  |
| 5  | C C10 | 0.7489355  | -0.5847449 | 0.0548152  |
| 6  | H H11 | 0.2835022  | -0.1279728 | -0.8156985 |
| 7  | C C11 | 0.4611098  | -1.8668181 | 0.3233625  |
| 8  | H H12 | 0.8845279  | -2.3941822 | 1.1733777  |
| 9  | C C12 | -0.4570930 | -2.6247006 | -0.5533210 |
| 10 | O O1  | -1.0187351 | -2.1938951 | -1.5421198 |
| 11 | O O2  | -0.5986966 | -3.8979997 | -0.1092677 |
| 12 | C C13 | -1.4696957 | -4.7237084 | -0.8953584 |
| 13 | H H5  | -2.4872360 | -4.3224924 | -0.8919402 |
| 14 | H H13 | -1.4449165 | -5.7075124 | -0.4253723 |
| 15 | H H14 | -1.1173309 | -4.7811726 | -1.9288566 |
| 16 | F F1  | 2.3876458  | 1.5065515  | -1.1002996 |
| 17 | F F2  | 3.7188171  | 1.5340913  | 0.6670521  |

|    |   |    |            |           |            |
|----|---|----|------------|-----------|------------|
| 18 | C | C4 | 0.1324177  | 2.4429016 | 0.5472554  |
| 19 | C | C5 | -0.2167458 | 2.9711565 | -0.6638453 |
| 20 | C | C6 | -1.5600181 | 3.4501561 | -0.5266274 |
| 21 | C | C7 | -1.9288519 | 3.1814347 | 0.7548266  |
| 22 | H | H1 | 0.4101903  | 3.0158134 | -1.5416556 |
| 23 | H | H8 | -2.1620993 | 3.9312406 | -1.2845736 |
| 24 | H | H9 | -2.8285917 | 3.3542179 | 1.3254461  |
| 25 | O | O3 | -0.9144789 | 2.5658491 | 1.4256099  |
| 26 | H | H2 | 1.6286680  | 2.1270843 | 2.0852611  |

### Furan 3,3 TS

Spartan'10: G = -850.287883, iv = none

Gaussian'09: B3LYP/6-31G\*, G = -850.290209, iv = i284

Gaussian'09: M06-2X/6-31G\*, G = -849.957473, iv = i332

|       |   | Cartesian Coordinates (Angstroms) |            |            |            |
|-------|---|-----------------------------------|------------|------------|------------|
| Atom  |   | X                                 | Y          | Z          |            |
| ----- |   | -----                             | -----      | -----      |            |
| 1     | C | C1                                | -0.0686022 | -0.6391635 | 1.1400999  |
| 2     | H | H3                                | -0.3649563 | -1.6315030 | 0.8437269  |
| 3     | C | C2                                | 1.2811173  | -0.3378544 | 1.5213062  |
| 4     | C | C5                                | 1.1576922  | 0.3153033  | -1.4749842 |
| 5     | H | H7                                | 1.1552839  | 1.3253536  | -1.8803005 |
| 6     | C | C6                                | -0.0969354 | -0.2147826 | -1.0919058 |
| 7     | H | H6                                | -0.2642143 | -1.2768469 | -1.1819185 |
| 8     | C | C3                                | 2.3686760  | -0.2873355 | -1.2439468 |
| 9     | C | C4                                | 2.4762418  | -0.7290840 | 0.9905851  |
| 10    | C | C11                               | 2.5722832  | -1.4377316 | -0.3188344 |
| 11    | H | H2                                | 3.2891460  | 0.2053055  | -1.5429394 |
| 12    | H | H10                               | 3.4002144  | -0.3149572 | 1.3784504  |
| 13    | C | C12                               | -1.2884862 | 0.6414637  | -1.2503270 |
| 14    | O | O1                                | -1.2818295 | 1.8382432  | -1.4710164 |
| 15    | O | O2                                | -2.4318212 | -0.0765206 | -1.0850122 |
| 16    | C | C13                               | -3.6464005 | 0.6748159  | -1.2190799 |
| 17    | H | H1                                | -3.7181560 | 1.1183212  | -2.2162060 |
| 18    | H | H5                                | -3.6912395 | 1.4756892  | -0.4752773 |
| 19    | H | H8                                | -4.4538401 | -0.0415801 | -1.0609347 |
| 20    | F | F1                                | 1.6519208  | -2.4545275 | -0.4594124 |
| 21    | F | F2                                | 3.8126397  | -1.9929923 | -0.4799666 |
| 22    | O | O3                                | 1.2640133  | 0.6728156  | 2.4716370  |
| 23    | C | C8                                | -0.0472362 | 0.9682551  | 2.7083964  |
| 24    | H | H12                               | -0.2145705 | 1.7366318  | 3.4495822  |
| 25    | C | C7                                | -0.8906130 | 0.2167166  | 1.9638239  |
| 26    | H | H11                               | -1.9703284 | 0.2459645  | 1.9844542  |

## cis 2-thiophene (cis-9d)

Spartan'10: G = -1173.29413, iv = none

Gaussian'09: B3LYP/6-31G\*, G = -1173.266174, iv = none

Gaussian'09: M06-2X/6-31G\*, G = -1172.963766, iv = none

### Cartesian Coordinates (Angstroms)

| Atom     | X          | Y          | Z          |
|----------|------------|------------|------------|
| 1 C C1   | 2.5255454  | 1.2442007  | 0.3046356  |
| 2 C C2   | 1.4092065  | 1.7127642  | 1.1546039  |
| 3 C C3   | 1.7042303  | 0.1577513  | 0.9110483  |
| 4 H H6   | 2.1492153  | -0.3384332 | 1.7698751  |
| 5 C C10  | 0.7967803  | -0.6445570 | 0.0819703  |
| 6 H H11  | 0.4006088  | -0.1915052 | -0.8237508 |
| 7 C C11  | 0.4227832  | -1.8986507 | 0.3752741  |
| 8 H H12  | 0.7706948  | -2.4181631 | 1.2634495  |
| 9 C C12  | -0.4986782 | -2.6301292 | -0.5203969 |
| 10 O O1  | -0.9591428 | -2.2123635 | -1.5654584 |
| 11 O O2  | -0.7784609 | -3.8584840 | -0.0190998 |
| 12 C C13 | -1.6709491 | -4.6513349 | -0.8149407 |
| 13 H H5  | -2.6213165 | -4.1310089 | -0.9613722 |
| 14 H H13 | -1.8205664 | -5.5759300 | -0.2562606 |
| 15 H H14 | -1.2297810 | -4.8612060 | -1.7934949 |
| 16 F F1  | 2.4811110  | 1.4238483  | -1.0366860 |
| 17 F F2  | 3.7919029  | 1.4207600  | 0.7448429  |
| 18 C C4  | 0.1974389  | 2.3794114  | 0.6317526  |
| 19 C C5  | -0.0206193 | 2.9993977  | -0.5735478 |
| 20 C C6  | -1.3376590 | 3.5345359  | -0.7029058 |
| 21 C C7  | -2.1103877 | 3.3194067  | 0.4031767  |
| 22 H H1  | 0.7391033  | 3.0735412  | -1.3415374 |
| 23 H H8  | -1.6890187 | 4.0596242  | -1.5843589 |
| 24 H H9  | -3.1355766 | 3.6182392  | 0.5758638  |
| 25 S S1  | -1.2434068 | 2.4495722  | 1.6278462  |
| 26 H H2  | 1.7269422  | 2.0187127  | 2.1494713  |

## cis 2-thiophene TS

Spartan'10: G = -1173.26802, iv = i300

Gaussian'09: B3LYP/6-31G\*, G = -1173.27068, iv = i292

Gaussian'09: M06-2X/6-31G\*, G = -1172.930053, iv = i355

### Cartesian Coordinates (Angstroms)

| Atom   | X          | Y          | Z          |
|--------|------------|------------|------------|
| 1 C C1 | 0.0363919  | -0.6432743 | 1.1516885  |
| 2 H H3 | -0.1761859 | -1.6591940 | 0.8567293  |
| 3 C C2 | 1.3874465  | -0.2999837 | 1.5137127  |
| 4 C C5 | 1.1733536  | 0.2907682  | -1.4934262 |
| 5 H H7 | 1.1752585  | 1.2953169  | -1.9124989 |
| 6 C C6 | -0.0790655 | -0.2116921 | -1.0622572 |
| 7 H H6 | -0.2724851 | -1.2692479 | -1.1547817 |

|    |   |     |            |            |            |
|----|---|-----|------------|------------|------------|
| 8  | C | C3  | 2.3786214  | -0.3339823 | -1.3002843 |
| 9  | C | C4  | 2.5468282  | -0.7424851 | 0.9329581  |
| 10 | C | C11 | 2.5890941  | -1.4767566 | -0.3677304 |
| 11 | H | H2  | 3.2976792  | 0.1349339  | -1.6388706 |
| 12 | H | H10 | 3.5118299  | -0.3750983 | 1.2683835  |
| 13 | C | C12 | -1.2579048 | 0.6675101  | -1.2124209 |
| 14 | O | O1  | -1.2307474 | 1.8606375  | -1.4478607 |
| 15 | O | O2  | -2.4125233 | -0.0273033 | -1.0305440 |
| 16 | C | C13 | -3.6139604 | 0.7468960  | -1.1609657 |
| 17 | H | H1  | -3.6960384 | 1.1636488  | -2.1688630 |
| 18 | H | H5  | -3.6249968 | 1.5685421  | -0.4391052 |
| 19 | H | H8  | -4.4331588 | 0.0529329  | -0.9673123 |
| 20 | F | F1  | 1.6536572  | -2.4833370 | -0.4711193 |
| 21 | F | F2  | 3.8170567  | -2.0516754 | -0.5559142 |
| 22 | S | S2  | 1.3849854  | 1.0245650  | 2.7059169  |
| 23 | C | C8  | -0.3631965 | 1.0161350  | 2.7583118  |
| 24 | H | H12 | -0.8724305 | 1.6934226  | 3.4324691  |
| 25 | C | C7  | -0.9252665 | 0.1083666  | 1.9231062  |
| 26 | H | H11 | -1.9942427 | -0.0496457 | 1.8406781  |

### alpha Me cis SM (*cis*-10i)

Spartan'10: G = -891.794682, iv = none

Gaussian'09: B3LYP/6-31G\*, G = -891.802283, iv = none

Gaussian'09: M06-2X/6-31G\*, G = -891.443545, iv = none

Cartesian Coordinates (Angstroms)

| Atom     | X          | Y          | Z          |
|----------|------------|------------|------------|
| 1 H H1   | 1.0605970  | 2.2101135  | 0.9795402  |
| 2 C C1   | 1.4318218  | 1.3411226  | 1.5172655  |
| 3 C C4   | 2.3865025  | -0.8862409 | 2.8887981  |
| 4 C C2   | 0.5185848  | 0.4461580  | 2.0944014  |
| 5 C C6   | 2.8045038  | 1.1268614  | 1.6258776  |
| 6 C C5   | 3.2865377  | 0.0103681  | 2.3130865  |
| 7 C C3   | 1.0111170  | -0.6707822 | 2.7826651  |
| 8 H H6   | 3.4977073  | 1.8308283  | 1.1731001  |
| 9 H H5   | 4.3566476  | -0.1582550 | 2.3986995  |
| 10 H H3  | 0.3185399  | -1.3740829 | 3.2324462  |
| 11 H H4  | 2.7523580  | -1.7575112 | 3.4255959  |
| 12 C C7  | -0.9468513 | 0.7418941  | 2.0124806  |
| 13 C C8  | -2.0024763 | -0.2830311 | 1.8928866  |
| 14 C C9  | -1.7848029 | 0.5524054  | 0.6736209  |
| 15 H H9  | -2.5331798 | 1.3236271  | 0.5234112  |
| 16 F F1  | -3.1525956 | -0.1268753 | 2.5902310  |
| 17 F F2  | -1.6724700 | -1.5967678 | 1.8516777  |
| 18 C C10 | -1.1539931 | -0.0304295 | -0.5213977 |
| 19 H H8  | -0.4580820 | -0.8435968 | -0.3434813 |
| 20 C C11 | -1.3639456 | 0.3454763  | -1.7988830 |
| 21 C C12 | -0.6574363 | -0.3600092 | -2.9068867 |
| 22 O O1  | -0.8167572 | -0.0880527 | -4.0826858 |
| 23 O O2  | 0.1855185  | -1.3350438 | -2.4887181 |
| 24 C C13 | 0.8788792  | -2.0320139 | -3.5329248 |
| 25 H H7  | 1.5263014  | -2.7480706 | -3.0254650 |

|    |   |     |            |            |            |
|----|---|-----|------------|------------|------------|
| 26 | H | H11 | 1.4701051  | -1.3364892 | -4.1346099 |
| 27 | H | H12 | 0.1715048  | -2.5502677 | -4.1865157 |
| 28 | H | H13 | -1.2694853 | 1.6294198  | 2.5548831  |
| 29 | C | C14 | -2.2831145 | 1.4423181  | -2.2707235 |
| 30 | H | H2  | -1.7367054 | 2.1587340  | -2.8934231 |
| 31 | H | H10 | -2.7448759 | 1.9845092  | -1.4427544 |
| 32 | H | H14 | -3.0804549 | 1.0336839  | -2.9021983 |

### alpha Me [3,3] - TS

Spartan'10: G = -891.746085, iv = i364

Gaussian'09: B3LYP/6-31G\*, G = -891.748315, iv = i353

Gaussian'09: M06-2X/6-31G\*, G = -891.387733, iv = i436

Cartesian Coordinates (Angstroms)

|    | Atom  | X          | Y          | Z          |
|----|-------|------------|------------|------------|
| 1  | C C1  | -0.0100016 | -0.5463738 | 1.0292330  |
| 2  | H H3  | -0.0273706 | -1.6176378 | 0.8919358  |
| 3  | C C2  | 1.2581965  | 0.0056784  | 1.4941897  |
| 4  | C C5  | 1.2777056  | -0.1356812 | -1.5540668 |
| 5  | H H7  | 1.3712153  | 0.7638974  | -2.1600692 |
| 6  | C C6  | -0.0625493 | -0.4626455 | -1.1428007 |
| 7  | C C7  | 1.2247206  | 1.2095288  | 2.2856223  |
| 8  | H H4  | 2.1708031  | 1.6498380  | 2.5907106  |
| 9  | C C8  | 0.0431027  | 1.7927875  | 2.6374625  |
| 10 | H H9  | 0.0404109  | 2.7063545  | 3.2256452  |
| 11 | C C9  | -1.2045022 | 1.2028254  | 2.2521706  |
| 12 | H H11 | -2.1324069 | 1.6587688  | 2.5871540  |
| 13 | C C10 | -1.2272576 | 0.0556325  | 1.5131135  |
| 14 | H H12 | -2.1709460 | -0.4165290 | 1.2572406  |
| 15 | C C3  | 2.4490914  | -0.7115405 | -1.1506657 |
| 16 | C C4  | 2.4742416  | -0.5391727 | 1.1292349  |
| 17 | C C11 | 2.6692876  | -1.5584310 | 0.0591998  |
| 18 | H H2  | 3.3809668  | -0.3191597 | -1.5489410 |
| 19 | H H10 | 3.3945289  | -0.0738765 | 1.4714696  |
| 20 | C C12 | -1.0180917 | 0.6571089  | -1.4359339 |
| 21 | O O1  | -0.7001388 | 1.8127592  | -1.6418218 |
| 22 | O O2  | -2.3096672 | 0.2444313  | -1.4290949 |
| 23 | C C13 | -3.2803384 | 1.2756347  | -1.6612080 |
| 24 | H H1  | -3.1226569 | 1.7401591  | -2.6382425 |
| 25 | H H5  | -3.2131662 | 2.0462063  | -0.8880948 |
| 26 | H H8  | -4.2502372 | 0.7774966  | -1.6258174 |
| 27 | F F1  | 1.8593515  | -2.6707964 | 0.1829681  |
| 28 | F F2  | 3.9592687  | -2.0250141 | 0.0765105  |
| 29 | C C14 | -0.6043500 | -1.8668552 | -1.3905727 |
| 30 | H H6  | 0.1631754  | -2.6169170 | -1.2093664 |
| 31 | H H13 | -0.9247594 | -1.9509253 | -2.4368304 |
| 32 | H H14 | -1.4776266 | -2.0875518 | -0.7703345 |

## Alpha-Me furan trans intermediate (25a)

Spartan'10: G = -889.603013, iv = none

Gaussian'09: B3LYP/6-31G\*, G = -889.610117, iv = none

Gaussian'09: M05-2X/6-31+G\*, G = -889.546801, iv = none

|       |     | Cartesian Coordinates (Angstroms) |            |            |
|-------|-----|-----------------------------------|------------|------------|
| Atom  |     | X                                 | Y          | Z          |
| ----- |     | -----                             | -----      | -----      |
| 1 C   | C1  | 1.5534980                         | 1.4511661  | -0.8407189 |
| 2 C   | C2  | 0.4917211                         | 1.7903833  | 0.1279921  |
| 3 C   | C3  | 0.9244027                         | 0.2753336  | -0.1820042 |
| 4 H   | H3  | -0.4628635                        | 2.0583940  | -0.3175496 |
| 5 H   | H6  | 1.5218784                         | -0.1559734 | 0.6148856  |
| 6 C   | C10 | -0.0116118                        | -0.5872870 | -0.9142971 |
| 7 H   | H11 | -0.4795535                        | -0.1381529 | -1.7855085 |
| 8 C   | C11 | -0.3444786                        | -1.8574102 | -0.6079688 |
| 9 C   | C12 | -1.3239442                        | -2.5939509 | -1.4571208 |
| 10 O  | O1  | -1.6466618                        | -3.7502884 | -1.2574843 |
| 11 O  | O2  | -1.8309451                        | -1.8576180 | -2.4768333 |
| 12 C  | C13 | -2.7730240                        | -2.5429624 | -3.3135530 |
| 13 H  | H5  | -2.2981176                        | -3.3916242 | -3.8139591 |
| 14 H  | H13 | -3.1050025                        | -1.8051376 | -4.0450116 |
| 15 H  | H14 | -3.6177249                        | -2.9086313 | -2.7238128 |
| 16 F  | F1  | 1.3171784                         | 1.6717582  | -2.1548017 |
| 17 F  | F2  | 2.8454017                         | 1.7427335  | -0.5556694 |
| 18 C  | C4  | 0.7592403                         | 2.3888452  | 1.4405016  |
| 19 C  | C5  | 1.8814512                         | 2.7972985  | 2.1068452  |
| 20 C  | C6  | 1.4445417                         | 3.2683479  | 3.3872879  |
| 21 C  | C7  | 0.0927241                         | 3.1158777  | 3.4074928  |
| 22 H  | H1  | 2.8913403                         | 2.7738015  | 1.7262248  |
| 23 H  | H8  | 2.0596539                         | 3.6732968  | 4.1787556  |
| 24 H  | H9  | -0.6741849                        | 3.3331767  | 4.1351185  |
| 25 O  | O3  | -0.3444406                        | 2.5796988  | 2.2324140  |
| 26 C  | C8  | 0.1868351                         | -2.6638126 | 0.5478402  |
| 27 H  | H2  | 0.9275234                         | -2.1143936 | 1.1329438  |
| 28 H  | H4  | 0.6441148                         | -3.5929560 | 0.1908463  |
| 29 H  | H7  | -0.6289523                        | -2.9599131 | 1.2171449  |

## alpha Me Furan Cis (cis-25a)

Spartan'10: G = --889.601018, iv = none

Gaussian'09: B3LYP/6-31G\*, G = -889.608862, iv = none

Gaussian'09: M06-2X/6-31G\*, G = -889.261077, iv = none

Cartesian Coordinates (Angstroms)

| Atom  |    | X          | Y          | Z          |
|-------|----|------------|------------|------------|
| ----- |    | -----      | -----      | -----      |
| 1 C   | C1 | -0.3974741 | -2.6219144 | -0.7714089 |
| 2 C   | C2 | -0.7247780 | -2.2690318 | 0.6247589  |

|    |   |     |            |            |            |
|----|---|-----|------------|------------|------------|
| 3  | C | C3  | -1.1395947 | -1.3394771 | -0.6178839 |
| 4  | H | H6  | -2.1994387 | -1.4005129 | -0.8440415 |
| 5  | C | C10 | -0.4706465 | -0.0488947 | -0.8306487 |
| 6  | H | H11 | 0.5991262  | -0.0217513 | -0.6541930 |
| 7  | C | C11 | -1.0889629 | 1.0876410  | -1.2085464 |
| 8  | C | C12 | -0.2992271 | 2.3444460  | -1.3638573 |
| 9  | O | O1  | -0.7798013 | 3.4150566  | -1.6872710 |
| 10 | O | O2  | 1.0223717  | 2.1864956  | -1.1093573 |
| 11 | C | C13 | 1.8179072  | 3.3713603  | -1.2452303 |
| 12 | H | H5  | 1.7452196  | 3.7714566  | -2.2602172 |
| 13 | H | H13 | 2.8408053  | 3.0620862  | -1.0270429 |
| 14 | H | H14 | 1.4908954  | 4.1394187  | -0.5386698 |
| 15 | F | F1  | 0.8932726  | -2.5849295 | -1.1823553 |
| 16 | F | F2  | -1.0238371 | -3.6754609 | -1.3426948 |
| 17 | C | C8  | -2.5694172 | 1.2172905  | -1.4795333 |
| 18 | H | H2  | -2.9498456 | 0.3755506  | -2.0671873 |
| 19 | H | H4  | -2.7689453 | 2.1413464  | -2.0245422 |
| 20 | H | H7  | -3.1435270 | 1.2566239  | -0.5445140 |
| 21 | H | H12 | -1.5836150 | -2.7932609 | 1.0376843  |
| 22 | C | C4  | 0.2948733  | -1.8679838 | 1.6026016  |
| 23 | C | C5  | 1.6595919  | -1.9238444 | 1.6504779  |
| 24 | C | C6  | 2.0461629  | -1.3645208 | 2.9116015  |
| 25 | C | C7  | 0.8917900  | -1.0125971 | 3.5394103  |
| 26 | O | O3  | -0.1860522 | -1.3079138 | 2.7592418  |
| 27 | H | H8  | 2.3055975  | -2.3206775 | 0.8820351  |
| 28 | H | H10 | 3.0502738  | -1.2492973 | 3.2950736  |
| 29 | H | H15 | 0.6672747  | -0.5667041 | 4.4963103  |

### alpha Me Furan VCPR TS

Spartan'10: G = -889.565926, iv = i88, 0.7630

Gaussian'09: B3LYP/6-31G\*, G = -889.569816, iv = i85, S^2 = 0.76

Gaussian'09: M05-2X/6-31+G\*, G = -889.502352, iv = i56, S^2 = 0.9266

#### Cartesian Coordinates (Angstroms)

| Atom     | X          | Y          | Z          |
|----------|------------|------------|------------|
| 1 C C    | -0.4041129 | 2.5914948  | -0.9599034 |
| 2 C C2   | -1.4497983 | 1.7333183  | -0.9510775 |
| 3 C C3   | -1.5151473 | 0.4795265  | -0.2387479 |
| 4 C C4   | 0.9435780  | 2.2099149  | -0.4366464 |
| 5 C C5   | 1.2510123  | 0.7573553  | -0.6097426 |
| 6 H H    | -0.4729379 | 3.5694436  | -1.4267338 |
| 7 H H7   | -2.3116161 | 1.9696306  | -1.5753268 |
| 8 H H12  | 0.9287033  | 0.3061349  | -1.5389267 |
| 9 F F1   | 1.8954887  | 2.9697258  | -1.1062616 |
| 10 F F2  | 1.0946380  | 2.5940510  | 0.9005045  |
| 11 C C11 | -2.2979979 | -0.5701880 | -0.9151502 |
| 12 O O1  | -2.7696087 | -0.4709860 | -2.0386564 |
| 13 O O2  | -2.4406324 | -1.6860087 | -0.1536856 |
| 14 C C12 | -3.1718374 | -2.7532977 | -0.7712530 |
| 15 H H1  | -4.1968192 | -2.4421135 | -0.9921350 |
| 16 H H9  | -3.1665562 | -3.5696404 | -0.0474465 |
| 17 H H10 | -2.6905039 | -3.0619753 | -1.7032552 |
| 18 C C1  | 2.1664149  | 0.0632262  | 0.1719121  |



|    |   |     |            |            |            |
|----|---|-----|------------|------------|------------|
| 19 | C | C6  | 2.8457301  | 0.3285411  | 1.3714154  |
| 20 | C | C7  | 3.6296160  | -0.8085007 | 1.6620184  |
| 21 | C | C8  | 3.3922828  | -1.7109159 | 0.6550611  |
| 22 | H | H3  | 2.7687563  | 1.2442339  | 1.9361133  |
| 23 | H | H5  | 4.2858374  | -0.9543082 | 2.5087800  |
| 24 | H | H11 | 3.7547219  | -2.7086143 | 0.4573138  |
| 25 | O | O3  | 2.5168398  | -1.2117084 | -0.2505679 |
| 26 | C | C9  | -1.1929891 | 0.3198419  | 1.2245581  |
| 27 | H | H2  | -0.6549729 | -0.6120974 | 1.4253217  |
| 28 | H | H4  | -2.1297930 | 0.2662678  | 1.7999525  |
| 29 | H | H6  | -0.6082963 | 1.1576479  | 1.6025651  |

### alpha Me Furan [3,3] TS

Spartan'10: G = -889.572731, iv = i272

Gaussian'09: B3LYP/6-31G\*, G = -889.570319, iv = i247

Gaussian'09: M06-2X/6-31G\*, G = -889.219479, iv = i329

| Cartesian Coordinates (Angstroms) |      |     |            |            |            |
|-----------------------------------|------|-----|------------|------------|------------|
|                                   | Atom | X   | Y          | Z          |            |
| -----                             |      |     |            |            |            |
| 1                                 | C    | C1  | -0.0507601 | -0.4543224 | 1.0779417  |
| 2                                 | C    | C2  | 1.3285473  | -0.1922498 | 1.4254050  |
| 3                                 | C    | C5  | 1.2591109  | 0.6796953  | -1.4833306 |
| 4                                 | H    | H7  | 1.2276939  | 1.7135085  | -1.8212804 |
| 5                                 | C    | C6  | 0.0194505  | 0.0856812  | -1.1461993 |
| 6                                 | H    | H6  | -0.1045372 | -0.9757655 | -1.2924427 |
| 7                                 | C    | C3  | 2.4871096  | 0.0990027  | -1.2918649 |
| 8                                 | C    | C4  | 2.5242029  | -0.5775166 | 0.8877604  |
| 9                                 | C    | C11 | 2.7170973  | -1.1330789 | -0.4856225 |
| 10                                | H    | H2  | 3.3934558  | 0.6452063  | -1.5353547 |
| 11                                | H    | H10 | 3.4272686  | -0.1629699 | 1.3237368  |
| 12                                | C    | C12 | -1.1932294 | 0.9112987  | -1.2931720 |
| 13                                | O    | O1  | -1.2210239 | 2.1234481  | -1.3997915 |
| 14                                | O    | O2  | -2.3211897 | 0.1474670  | -1.2620386 |
| 15                                | C    | C13 | -3.5513839 | 0.8747359  | -1.3868180 |
| 16                                | H    | H1  | -3.5914586 | 1.4020560  | -2.3439272 |
| 17                                | H    | H5  | -3.6540328 | 1.6057142  | -0.5796587 |
| 18                                | H    | H8  | -4.3426300 | 0.1260135  | -1.3300535 |
| 19                                | F    | F1  | 1.8935485  | -2.1879088 | -0.8149991 |
| 20                                | F    | F2  | 4.0033845  | -1.5811108 | -0.6317074 |
| 21                                | O    | O3  | 1.3742344  | 0.8415684  | 2.3582190  |
| 22                                | C    | C8  | 0.0889164  | 1.2342896  | 2.5778535  |
| 23                                | H    | H12 | -0.0279724 | 2.0390440  | 3.2899567  |
| 24                                | C    | C7  | -0.7988195 | 0.5208325  | 1.8549223  |
| 25                                | H    | H11 | -1.8752294 | 0.6180992  | 1.8757905  |
| 26                                | C    | C9  | -0.6351157 | -1.8391381 | 0.8793952  |
| 27                                | H    | H3  | 0.0482415  | -2.5028530 | 0.3522604  |
| 28                                | H    | H4  | -1.5800524 | -1.7834940 | 0.3308222  |
| 29                                | H    | H9  | -0.8448273 | -2.2772530 | 1.8641973  |

## alpha Me thiophene trans INT

Spartan'10: G = -1212.58519, iv = none

Gaussian'09: B3LYP/6-31G\*, G = -1212.592277, iv = none

Gaussian'09: M05-2X/6-31+G\*, G = -1212.515989, iv = none

| Cartesian Coordinates (Angstroms) |       |            |            |            |
|-----------------------------------|-------|------------|------------|------------|
|                                   | Atom  | X          | Y          | Z          |
| -----                             |       |            |            |            |
| 1                                 | C C1  | 1.3238346  | 1.8053593  | -1.0873313 |
| 2                                 | C C2  | 0.3236245  | 2.0555461  | -0.0261839 |
| 3                                 | C C3  | 0.7947459  | 0.5774852  | -0.4337566 |
| 4                                 | H H3  | -0.6629199 | 2.2910881  | -0.4193521 |
| 5                                 | H H6  | 1.4671961  | 0.1447690  | 0.3006432  |
| 6                                 | C C10 | -0.1521435 | -0.2998764 | -1.1306003 |
| 7                                 | H H11 | -0.7086025 | 0.1470115  | -1.9516066 |
| 8                                 | C C11 | -0.4132408 | -1.5938060 | -0.8575352 |
| 9                                 | C C12 | -1.4436718 | -2.2378082 | -1.7276760 |
| 10                                | O O1  | -2.0529892 | -1.6948496 | -2.6300681 |
| 11                                | O O2  | -1.6367371 | -3.5367477 | -1.3911883 |
| 12                                | C C13 | -2.6140969 | -4.2329163 | -2.1782058 |
| 13                                | H H5  | -3.5922056 | -3.7524431 | -2.0896039 |
| 14                                | H H13 | -2.6456048 | -5.2463562 | -1.7764506 |
| 15                                | H H14 | -2.3212873 | -4.2449945 | -3.2316104 |
| 16                                | F F1  | 0.9666480  | 2.0709919  | -2.3647945 |
| 17                                | F F2  | 2.6255702  | 2.1330297  | -0.9051421 |
| 18                                | C C4  | 0.6368519  | 2.6075189  | 1.3066015  |
| 19                                | C C5  | 1.8186201  | 3.0845746  | 1.8198117  |
| 20                                | C C6  | 1.7098868  | 3.5215417  | 3.1739268  |
| 21                                | C C7  | 0.4500156  | 3.3767994  | 3.6831748  |
| 22                                | H H1  | 2.7336715  | 3.1321452  | 1.2437964  |
| 23                                | H H8  | 2.5379027  | 3.9365040  | 3.7385555  |
| 24                                | H H9  | 0.0885315  | 3.6356113  | 4.6692928  |
| 25                                | S S1  | -0.6328297 | 2.6926397  | 2.5135808  |
| 26                                | C C8  | 0.2286312  | -2.4216599 | 0.2250870  |
| 27                                | H H2  | 0.9683101  | -1.8523869 | 0.7935081  |
| 28                                | H H4  | 0.7256047  | -3.3028920 | -0.1960225 |
| 29                                | H H7  | -0.5233161 | -2.7958786 | 0.9291498  |

## alpha Me thiophene cis INT

Spartan'10: G = -1212.58342, iv = none

Gaussian'09: B3LYP/6-31G\*, G = -1212.590736, iv = none

Gaussian'09: M06-2X/6-31G\*, G = -1212.235623, iv = none

| Cartesian Coordinates (Angstroms) |       |            |            |            |
|-----------------------------------|-------|------------|------------|------------|
|                                   | Atom  | X          | Y          | Z          |
| -----                             |       |            |            |            |
| 1                                 | C C1  | -0.3940924 | -2.6141307 | -0.8489641 |
| 2                                 | C C2  | -0.6969888 | -2.3231410 | 0.5698131  |
| 3                                 | C C3  | -1.1912896 | -1.3758097 | -0.6243956 |
| 4                                 | H H6  | -2.2506758 | -1.4802514 | -0.8338615 |
| 5                                 | C C10 | -0.5785213 | -0.0523812 | -0.8104740 |

|    |   |     |            |            |            |
|----|---|-----|------------|------------|------------|
| 6  | H | H11 | 0.4985106  | -0.0069438 | -0.6890946 |
| 7  | C | C11 | -1.2258589 | 1.0922481  | -1.1062525 |
| 8  | C | C12 | -0.4554745 | 2.3600827  | -1.2657540 |
| 9  | O | O1  | -0.9745590 | 3.4315331  | -1.5179732 |
| 10 | O | O2  | 0.8816684  | 2.2138075  | -1.1053489 |
| 11 | C | C13 | 1.6495322  | 3.4162353  | -1.2480852 |
| 12 | H | H5  | 1.5244135  | 3.8375129  | -2.2492658 |
| 13 | H | H13 | 2.6864147  | 3.1213705  | -1.0834070 |
| 14 | H | H14 | 1.3404552  | 4.1617108  | -0.5102149 |
| 15 | F | F1  | 0.8754880  | -2.5058601 | -1.3074883 |
| 16 | F | F2  | -0.9959479 | -3.6751708 | -1.4339463 |
| 17 | C | C8  | -2.7101438 | 1.2581473  | -1.3035409 |
| 18 | H | H2  | -3.2576160 | 0.3225437  | -1.1691833 |
| 19 | H | H4  | -2.9256928 | 1.6449311  | -2.3055924 |
| 20 | H | H7  | -3.1088181 | 1.9955476  | -0.5985513 |
| 21 | H | H12 | -1.5180544 | -2.9178563 | 0.9655118  |
| 22 | C | C4  | 0.3183431  | -1.8915918 | 1.5540113  |
| 23 | C | C5  | 1.6851787  | -2.0166016 | 1.5284367  |
| 24 | C | C6  | 2.3232695  | -1.4802018 | 2.6874215  |
| 25 | C | C7  | 1.4390497  | -0.9528049 | 3.5858528  |
| 26 | S | S1  | -0.1970221 | -1.0952734 | 3.0276960  |
| 27 | H | H8  | 2.2159130  | -2.4811604 | 0.7070238  |
| 28 | H | H10 | 3.3963745  | -1.4948614 | 2.8431709  |
| 29 | H | H15 | 1.6461442  | -0.4916305 | 4.5424558  |

### alpha Me thiophene VCPR TS

Spartan'10: G = -1212.54641, iv = i83, S<sup>2</sup> = 0.7803

Gaussian'09: B3LYP/6-31G\*, G = -1212.551391, iv = i86, S<sup>2</sup> = 0.58

Gaussian'09: M05-2X/6-31+G\*, G = -1173.189048, iv = i147, S<sup>2</sup> = 0.76

| Cartesian Coordinates (Angstroms) |   |     |            |            |            |
|-----------------------------------|---|-----|------------|------------|------------|
| Atom                              |   | X   | Y          | Z          |            |
| -----                             |   |     |            |            |            |
| 1                                 | C | C   | -0.4286277 | 2.7001455  | -0.9162575 |
| 2                                 | C | C2  | -1.4696176 | 1.8359440  | -0.9008575 |
| 3                                 | C | C3  | -1.5298555 | 0.5868081  | -0.1810509 |
| 4                                 | C | C4  | 0.9236504  | 2.3299843  | -0.3973802 |
| 5                                 | C | C5  | 1.2423567  | 0.8764220  | -0.5519030 |
| 6                                 | H | H   | -0.5044532 | 3.6750544  | -1.3882538 |
| 7                                 | H | H7  | -2.3326688 | 2.0647375  | -1.5261167 |
| 8                                 | H | H12 | 0.9100625  | 0.4291747  | -1.4816979 |
| 9                                 | F | F1  | 1.8675989  | 3.0832268  | -1.0833248 |
| 10                                | F | F2  | 1.0843598  | 2.7255446  | 0.9334470  |
| 11                                | C | C11 | -2.3012032 | -0.4732423 | -0.8537228 |
| 12                                | O | O1  | -2.7566482 | -0.3912181 | -1.9855045 |
| 13                                | O | O2  | -2.4475340 | -1.5807004 | -0.0805073 |
| 14                                | C | C12 | -3.1677261 | -2.6588455 | -0.6922473 |
| 15                                | H | H1  | -4.1896634 | -2.3530341 | -0.9335474 |
| 16                                | H | H9  | -3.1724031 | -3.4633918 | 0.0441862  |
| 17                                | H | H10 | -2.6722572 | -2.9815926 | -1.6123564 |
| 18                                | C | C1  | 2.1479112  | 0.1502133  | 0.2188714  |
| 19                                | C | C6  | 2.5984777  | -1.1573475 | -0.0604199 |
| 20                                | C | C7  | 3.5003476  | -1.6637240 | 0.8898238  |
| 21                                | C | C8  | 3.7575592  | -0.7702064 | 1.9093507  |

|    |   |     |            |            |            |
|----|---|-----|------------|------------|------------|
| 22 | H | H3  | 2.2685549  | -1.6969482 | -0.9416766 |
| 23 | H | H5  | 3.9518922  | -2.6480383 | 0.8325259  |
| 24 | H | H11 | 4.4127766  | -0.9097496 | 2.7593308  |
| 25 | S | S1  | 2.8858342  | 0.7148177  | 1.7306140  |
| 26 | C | C9  | -1.1945736 | 0.4309267  | 1.2788112  |
| 27 | H | H2  | -0.6295144 | -0.4869083 | 1.4728387  |
| 28 | H | H4  | -2.1251082 | 0.3495401  | 1.8604097  |
| 29 | H | H6  | -0.6295277 | 1.2824074  | 1.6566148  |

### alpha Me thiophene 3,3 TS

Spartan'10: G = -1212.54839, iv = i263

Gaussian'09: B3LYP/6-31G\*, G = -1173.27068, iv = 292

Gaussian'09: M06-2X/6-31G\*, G = -1172.930053, iv = i335

Cartesian Coordinates (Angstroms)

|    | Atom  | X          | Y          | Z          |
|----|-------|------------|------------|------------|
| 1  | C C1  | 0.1457678  | -0.4810391 | 1.3189222  |
| 2  | H H3  | 0.1130342  | -1.5256464 | 1.0528317  |
| 3  | C C2  | 1.4068513  | 0.1148581  | 1.6544117  |
| 4  | C C5  | 1.1974107  | 0.2862417  | -1.4050061 |
| 5  | H H7  | 1.1652146  | 1.2606365  | -1.8906403 |
| 6  | C C6  | -0.0702641 | -0.2276530 | -1.0040764 |
| 7  | C C3  | 2.4511871  | -0.1973151 | -1.1229512 |
| 8  | C C4  | 2.6415093  | -0.2034674 | 1.1489605  |
| 9  | C C11 | 2.8414681  | -1.1165508 | -0.0159610 |
| 10 | H H2  | 3.3075510  | 0.3408363  | -1.5206281 |
| 11 | H H10 | 3.5263145  | 0.3521231  | 1.4426269  |
| 12 | C C12 | -1.1599725 | 0.7907009  | -1.0778121 |
| 13 | O O1  | -0.9961082 | 1.9873594  | -1.2296738 |
| 14 | O O2  | -2.3904437 | 0.2366229  | -0.9236220 |
| 15 | C C13 | -3.4816825 | 1.1680769  | -0.9479221 |
| 16 | H H1  | -3.5329320 | 1.6767006  | -1.9144631 |
| 17 | H H5  | -3.3642256 | 1.9185182  | -0.1616101 |
| 18 | H H8  | -4.3799083 | 0.5719050  | -0.7817891 |
| 19 | F F1  | 2.1428866  | -2.2998007 | 0.0822550  |
| 20 | F F2  | 4.1653004  | -1.4563063 | -0.1251042 |
| 21 | S S1  | 1.1568384  | 1.5248199  | 2.7115962  |
| 22 | C C8  | -0.5628487 | 1.2204223  | 2.7615546  |
| 23 | H H12 | -1.1944145 | 1.8597683  | 3.3654718  |
| 24 | C C7  | -0.9435487 | 0.1521811  | 2.0143278  |
| 25 | H H11 | -1.9682185 | -0.1939008 | 1.9442078  |
| 26 | C C9  | -0.4705883 | -1.6687664 | -1.2745490 |
| 27 | H H4  | 0.3836005  | -2.3380882 | -1.1976401 |
| 28 | H H6  | -0.8652987 | -1.7402301 | -2.2972913 |
| 29 | H H9  | -1.2644803 | -2.0130071 | -0.6064268 |

## Weinreb cis E INT (29a)

Spartan'10: G = -947.065987, iv = none

Gaussian'09: B3LYP/6-31G\*, G = -947.073972, iv = none

Gaussian'09: M06-2X/6-31G\*, G = -946.691616, iv = none

### Cartesian Coordinates (Angstroms)

| Atom     | X          | Y          | Z          |
|----------|------------|------------|------------|
| 1 C C1   | -2.3342695 | -1.5454125 | -1.3511858 |
| 2 C C2   | -2.7447096 | -0.4462149 | -0.4551097 |
| 3 C C3   | -1.4273573 | -0.3577660 | -1.3337565 |
| 4 H H6   | -1.5152749 | 0.2988081  | -2.1960640 |
| 5 C C4   | -2.6988380 | -0.5252874 | 1.0397700  |
| 6 C C5   | -2.6905013 | -0.5938805 | 3.8467547  |
| 7 C C6   | -2.2668534 | 0.5848170  | 1.7792730  |
| 8 C C7   | -3.1259504 | -1.6709614 | 1.7235669  |
| 9 C C8   | -3.1207600 | -1.7036023 | 3.1190950  |
| 10 C C9  | -2.2629843 | 0.5521683  | 3.1726594  |
| 11 H H4  | -1.9246668 | 1.4736453  | 1.2554516  |
| 12 H H7  | -3.4552808 | -2.5399206 | 1.1631142  |
| 13 H H8  | -3.4517391 | -2.6000725 | 3.6365206  |
| 14 H H9  | -1.9215411 | 1.4191895  | 3.7317247  |
| 15 H H10 | -2.6846636 | -0.6219162 | 4.9330309  |
| 16 C C10 | -0.0989138 | -0.4383716 | -0.7096473 |
| 17 H H11 | 0.0410455  | -1.1351713 | 0.1130367  |
| 18 C C11 | 0.9532007  | 0.2940602  | -1.1057679 |
| 19 H H12 | 0.8719660  | 1.0115473  | -1.9139824 |
| 20 C C12 | 2.2567329  | 0.1334208  | -0.4136725 |
| 21 O O1  | 2.4230121  | -0.6104655 | 0.5490410  |
| 22 N N1  | 3.3366603  | 0.8264438  | -0.9512772 |
| 23 C C13 | 4.5433780  | 1.0426835  | -0.1707411 |
| 24 H H5  | 4.6505058  | 0.1942966  | 0.5044075  |
| 25 H H13 | 4.4740857  | 1.9710549  | 0.4103888  |
| 26 H H14 | 5.4103153  | 1.0977487  | -0.8358071 |
| 27 F F1  | -1.8898330 | -2.7129702 | -0.8300171 |
| 28 F F2  | -3.0590584 | -1.7918138 | -2.4682801 |
| 29 O O2  | 3.0426753  | 1.9122541  | -1.8046925 |
| 30 C C14 | 3.4748363  | 1.6169464  | -3.1354056 |
| 31 H H2  | 3.2608473  | 2.5197991  | -3.7136277 |
| 32 H H1  | 2.9239356  | 0.7653288  | -3.5521093 |
| 33 H H15 | 4.5506512  | 1.4065694  | -3.1695807 |
| 34 H H16 | -3.5406528 | 0.1730448  | -0.8671103 |

## Weinreb [3,3] TS

Spartan'10: G = -947.017003, iv = i374

Gaussian'09: B3LYP/6-31G\*, G = -947.020971, iv = i276

Gaussian'09: M06-2X/6-31G\*, G = -946.63488, iv = i451

| Cartesian Coordinates (Angstroms) |            |            |            |  |
|-----------------------------------|------------|------------|------------|--|
| Atom                              | X          | Y          | Z          |  |
| -----                             |            |            |            |  |
| 1 C C1                            | -0.2914116 | -0.5301221 | 1.3258970  |  |
| 2 H H3                            | -0.1490741 | -1.5987044 | 1.2410897  |  |
| 3 C C2                            | -1.5992406 | -0.1288100 | 1.8498740  |  |
| 4 C C5                            | -1.7065614 | -0.0875395 | -1.1823929 |  |
| 5 H H7                            | -1.7936212 | 0.8376777  | -1.7473401 |  |
| 6 C C6                            | -0.3866717 | -0.4669373 | -0.7768860 |  |
| 7 H H6                            | -0.1859351 | -1.5272410 | -0.8212505 |  |
| 8 C C7                            | -1.6684294 | 1.0558448  | 2.6685345  |  |
| 9 H H4                            | -2.6462624 | 1.3782920  | 3.0177572  |  |
| 10 C C8                           | -0.5526258 | 1.7769196  | 2.9728796  |  |
| 11 H H9                           | -0.6332733 | 2.6798318  | 3.5717877  |  |
| 12 C C9                           | 0.7381171  | 1.3485167  | 2.5196794  |  |
| 13 H H11                          | 1.6188502  | 1.9132518  | 2.8122116  |  |
| 14 C C10                          | 0.8642911  | 0.2210823  | 1.7668847  |  |
| 15 H H12                          | 1.8503260  | -0.1294780 | 1.4762307  |  |
| 16 C C3                           | -2.8492911 | -0.7208373 | -0.7866194 |  |
| 17 C C4                           | -2.7675325 | -0.7699790 | 1.4889247  |  |
| 18 C C11                          | -2.9136347 | -1.7018603 | 0.3353786  |  |
| 19 H H2                           | -3.8192515 | -0.3540813 | -1.1095863 |  |
| 20 H H10                          | -3.7145119 | -0.4114708 | 1.8831897  |  |
| 21 C C12                          | 0.6929765  | 0.4679799  | -1.2320579 |  |
| 22 O O1                           | 0.4761184  | 1.6632645  | -1.3886650 |  |
| 23 N N1                           | 1.9294753  | -0.0828262 | -1.5421181 |  |
| 24 F F1                           | -1.9577050 | -2.6994676 | 0.2803596  |  |
| 25 F F2                           | -4.1312168 | -2.3293136 | 0.3714625  |  |
| 26 C C13                          | 2.4761775  | -1.3675948 | -1.1439412 |  |
| 27 H H1                           | 3.2010075  | -1.6879700 | -1.8983552 |  |
| 28 H H5                           | 1.6857440  | -2.1163524 | -1.0894241 |  |
| 29 H H8                           | 2.9888294  | -1.3077874 | -0.1739330 |  |
| 30 O O2                           | 2.9719230  | 0.8527016  | -1.6718440 |  |
| 31 C C14                          | 3.0387716  | 1.3529058  | -3.0114028 |  |
| 32 H H13                          | 3.1756382  | 0.5367688  | -3.7324742 |  |
| 33 H H14                          | 3.9163757  | 2.0046060  | -3.0220940 |  |
| 34 H H15                          | 2.1416286  | 1.9287295  | -3.2517563 |  |

## CN E cis (cis-10a)

Spartan'10: G = -716.911798, iv = none

Gaussian'09: B3LYP/6-31G\*, G = -716.91601, iv = none

Gaussian'09: M06-2X/6-31G\*, G = -716.635411, iv = none

### Cartesian Coordinates (Angstroms)

| Atom     | X          | Y          | Z          |
|----------|------------|------------|------------|
| 1 C C1   | 0.8384972  | -0.0293373 | -2.2221422 |
| 2 C C2   | -0.3885136 | 0.3527766  | -1.4965935 |
| 3 C C3   | 0.0569712  | -1.1649306 | -1.6406357 |
| 4 H H3   | -1.2259717 | 0.5801881  | -2.1550650 |
| 5 C C4   | -0.4016202 | 1.0552264  | -0.1737740 |
| 6 C C5   | -0.5390172 | 2.4067366  | 2.2840982  |
| 7 C C6   | -1.3816954 | 0.7197947  | 0.7719740  |
| 8 C C7   | 0.5083578  | 2.0774201  | 0.1262152  |
| 9 C C8   | 0.4386420  | 2.7474573  | 1.3492651  |
| 10 C C9  | -1.4511456 | 1.3901265  | 1.9918145  |
| 11 H H4  | -2.0912052 | -0.0732301 | 0.5488670  |
| 12 H H7  | 1.2735488  | 2.3463932  | -0.5943289 |
| 13 H H8  | 1.1521606  | 3.5368782  | 1.5694348  |
| 14 H H9  | -2.2152386 | 1.1173901  | 2.7146395  |
| 15 H H10 | -0.5905754 | 2.9289998  | 3.2354672  |
| 16 C C10 | 0.5670599  | -1.9031929 | -0.4780249 |
| 17 H H11 | 1.2154473  | -1.3671086 | 0.2095548  |
| 18 F F1  | 0.8806104  | 0.1048032  | -3.5664402 |
| 19 F F2  | 2.0528279  | 0.2561481  | -1.6955350 |
| 20 H H2  | -0.5309570 | -1.7369171 | -2.3540265 |
| 21 C C11 | 0.2694682  | -3.1931334 | -0.2351451 |
| 22 H H1  | -0.3753362 | -3.7579873 | -0.9051597 |
| 23 C C12 | 0.7710893  | -3.8997362 | 0.8981439  |
| 24 N N1  | 1.1665959  | -4.4947655 | 1.8173967  |

## CN E [3,3] TS

Spartan'10: G = -716.870471, iv = i381

Gaussian'09: B3LYP/6-31G\*, G = -716.871513, iv = i384

Gaussian'09: M06-2X/6-31G\*, G = -716.586383, iv = i459

### Cartesian Coordinates (Angstroms)

| Atom    | X          | Y          | Z          |
|---------|------------|------------|------------|
| 1 C C1  | -0.8088086 | -0.5052546 | 0.4670589  |
| 2 H H3  | -0.9601465 | -1.5672415 | 0.3333548  |
| 3 C C2  | 0.5041776  | -0.1360068 | 1.0003515  |
| 4 C C5  | 0.6094299  | 0.0070984  | -2.0576895 |
| 5 H H7  | 0.7322234  | 0.9241156  | -2.6299300 |
| 6 C C6  | -0.7219691 | -0.3378939 | -1.6323141 |
| 7 H H6  | -0.9883166 | -1.3847092 | -1.7170743 |
| 8 C C7  | 0.5845518  | 1.0116801  | 1.8701791  |
| 9 H H4  | 1.5646116  | 1.3115768  | 2.2327551  |
| 10 C C8 | -0.5278186 | 1.7231151  | 2.2079213  |
| 11 H H9 | -0.4417853 | 2.5954906  | 2.8497921  |

|    |   |     |            |            |            |
|----|---|-----|------------|------------|------------|
| 12 | C | C9  | -1.8226470 | 1.3286345  | 1.7312997  |
| 13 | H | H11 | -2.6973987 | 1.8905458  | 2.0459019  |
| 14 | C | C10 | -1.9604833 | 0.2386595  | 0.9266856  |
| 15 | H | H12 | -2.9446696 | -0.0819697 | 0.5984315  |
| 16 | C | C3  | 1.7357562  | -0.6589915 | -1.6744165 |
| 17 | C | C4  | 1.6614246  | -0.7759015 | 0.6076258  |
| 18 | C | C11 | 1.7837623  | -1.6715874 | -0.5788014 |
| 19 | H | H2  | 2.7107493  | -0.3107918 | -2.0015767 |
| 20 | H | H10 | 2.6162454  | -0.4503849 | 1.0114748  |
| 21 | F | F1  | 0.8069298  | -2.6435541 | -0.6632285 |
| 22 | F | F2  | 2.9879160  | -2.3219049 | -0.5697096 |
| 23 | C | C12 | -1.7787176 | 0.5460953  | -2.0362881 |
| 24 | N | N1  | -2.6450171 | 1.2691801  | -2.3218035 |

### CN Z INT (*cis*-10h)

Spartan'10: G = -716.911953, iv = none

Gaussian'09: B3LYP/6-31G\*, G = -716.916391, iv = none

Gaussian'09: M06-2X/6-31G\*, G = --716.637087, iv = none

Cartesian Coordinates (Angstroms)

|    | Atom | X   | Y          | Z          |            |
|----|------|-----|------------|------------|------------|
| 1  | C    | C1  | -1.3052491 | 0.6534900  | -1.7473256 |
| 2  | C    | C2  | -1.3174749 | -0.1515324 | -0.5107186 |
| 3  | C    | C3  | -0.4276179 | -0.5571128 | -1.7622719 |
| 4  | H    | H3  | -2.1888862 | -0.7992368 | -0.4249284 |
| 5  | C    | C4  | -0.7118527 | 0.2902570  | 0.7861344  |
| 6  | C    | C5  | 0.3586852  | 1.0479699  | 3.2694727  |
| 7  | C    | C6  | -0.0334426 | -0.6418633 | 1.5849899  |
| 8  | C    | C7  | -0.8476052 | 1.6066244  | 1.2466254  |
| 9  | C    | C8  | -0.3145495 | 1.9816313  | 2.4812757  |
| 10 | C    | C9  | 0.4975196  | -0.2667018 | 2.8179120  |
| 11 | H    | H4  | 0.0793366  | -1.6643518 | 1.2335346  |
| 12 | H    | H7  | -1.3672142 | 2.3390743  | 0.6376639  |
| 13 | H    | H8  | -0.4277317 | 3.0060297  | 2.8256598  |
| 14 | H    | H9  | 1.0205771  | -1.0003674 | 3.4254199  |
| 15 | H    | H10 | 0.7729671  | 1.3412882  | 4.2302219  |
| 16 | C    | C10 | 1.0319841  | -0.4074183 | -1.7078640 |
| 17 | H    | H11 | 1.4187922  | 0.4888395  | -1.2314107 |
| 18 | C    | C11 | 1.9199131  | -1.2914217 | -2.2029974 |
| 19 | H    | H12 | 2.9864701  | -1.1004944 | -2.1261998 |
| 20 | F    | F1  | -0.7198674 | 1.8760887  | -1.7499297 |
| 21 | F    | F2  | -2.3991365 | 0.6706445  | -2.5398610 |
| 22 | H    | H2  | -0.8069124 | -1.4069014 | -2.3229696 |
| 23 | C    | C12 | 1.5417345  | -2.5090008 | -2.8455583 |
| 24 | N    | N1  | 1.2395607  | -3.5055343 | -3.3668747 |



## CN Z [3,3] TS

Spartan'10: G = -716.863331, iv = none

Gaussian'09: B3LYP/6-31G\*, G = -716.864276, iv = i384

Gaussian'09: M06-2X/6-31G\*, G = -716.578656, iv = i458

### Cartesian Coordinates (Angstroms)

| Atom     | X          | Y          | Z          |
|----------|------------|------------|------------|
| 1 C C1   | -0.8423313 | -0.3854496 | 0.4662477  |
| 2 H H3   | -0.9858849 | -1.4242021 | 0.2074645  |
| 3 C C2   | 0.4608799  | -0.0289211 | 1.0064344  |
| 4 C C5   | 0.6213220  | 0.2719571  | -2.0300150 |
| 5 H H7   | 0.8147920  | 1.2431589  | -2.4844903 |
| 6 C C6   | -0.7472213 | 0.0044337  | -1.6969464 |
| 7 H H8   | -1.4126024 | 0.8586842  | -1.8178538 |
| 8 C C7   | 0.5317204  | 1.0873507  | 1.9133168  |
| 9 H H4   | 1.5069625  | 1.3804196  | 2.2941124  |
| 10 C C8  | -0.5896368 | 1.7785552  | 2.2738744  |
| 11 H H9  | -0.5117713 | 2.6244792  | 2.9512872  |
| 12 C C9  | -1.8760834 | 1.3957891  | 1.7765733  |
| 13 H H11 | -2.7567043 | 1.9402548  | 2.1060845  |
| 14 C C10 | -1.9991775 | 0.3320961  | 0.9280028  |
| 15 H H12 | -2.9767536 | 0.0045472  | 0.5842892  |
| 16 C C3  | 1.7198049  | -0.4566810 | -1.6635881 |
| 17 C C4  | 1.6261879  | -0.6463821 | 0.5838551  |
| 18 C C11 | 1.7519420  | -1.5222970 | -0.6186132 |
| 19 H H2  | 2.7069898  | -0.1011847 | -1.9440974 |
| 20 H H10 | 2.5791735  | -0.3257808 | 0.9957299  |
| 21 F F1  | 0.7885549  | -2.4881404 | -0.7296507 |
| 22 F F2  | 2.9645099  | -2.1596987 | -0.6208029 |
| 23 C C12 | -1.3931786 | -1.2146902 | -2.0820448 |
| 24 N N1  | -1.9814943 | -2.1682982 | -2.3991697 |

## Literature Predictions

### Erbes and Boland trans SM (trans-49)

Gaussian'09: B3LYP/6-31G\*, G = -628.208979, iv = none

Cartesian Coordinates (Angstroms)

| Atom     | X          | Y          | Z          |
|----------|------------|------------|------------|
| 1 C C1   | 2.1824440  | 2.4440161  | -0.9529439 |
| 2 C C2   | 0.8731754  | 3.0361150  | -0.5198276 |
| 3 C C3   | 1.0267060  | 1.5332680  | -0.6077047 |
| 4 H H6   | 1.0998863  | 1.0140289  | 0.3462317  |
| 5 C C10  | 0.3221516  | 0.7643655  | -1.6561767 |
| 6 H H11  | 0.2760916  | 1.2185969  | -2.6460780 |
| 7 C C11  | -0.2358471 | -0.4350329 | -1.4712997 |
| 8 H H15  | -0.7345043 | -0.9617367 | -2.2797294 |
| 9 C C4   | 0.7568048  | 3.6565147  | 0.8060946  |
| 10 C C6  | 0.0066983  | 4.7264722  | 1.1004036  |
| 11 H H1  | -0.5936315 | 5.2214553  | 0.3431933  |
| 12 H H13 | -0.0211473 | 5.1271845  | 2.1088408  |
| 13 H H17 | 1.3404568  | 3.2048235  | 1.6081830  |
| 14 F F1  | 3.2781083  | 2.4714643  | -0.1094657 |
| 15 F F2  | 2.4980711  | 2.5871280  | -2.2918194 |
| 16 C C5  | -0.2048685 | -1.1384911 | -0.1118337 |
| 17 H H3  | 0.8356307  | -1.2967445 | 0.1939984  |
| 18 H H5  | -0.7140301 | -0.5163774 | 0.6331126  |
| 19 C C7  | -0.9161152 | -2.4899150 | -0.2201975 |
| 20 H H4  | -0.4069540 | -3.1120293 | -0.9651436 |
| 21 H H7  | -1.9566144 | -2.3316614 | -0.5260294 |
| 22 C C8  | -0.8851375 | -3.1933728 | 1.1392687  |
| 23 H H8  | 0.1553615  | -3.3516268 | 1.4451012  |
| 24 H H10 | -1.3942988 | -2.5712584 | 1.8842147  |
| 25 C C9  | -1.5963850 | -4.5447962 | 1.0309051  |
| 26 H H9  | -1.0872241 | -5.1669111 | 0.2859594  |
| 27 H H12 | -2.6368840 | -4.3865419 | 0.7250728  |
| 28 H H14 | -1.5742096 | -5.0483816 | 2.0041091  |
| 29 H H16 | 0.3062651  | 3.5394442  | -1.2964399 |

### Erbes and Boland cis SM (49)

Gaussian'09: B3LYP/6-31G\*, G = -628.207323, iv = none

Cartesian Coordinates (Angstroms)

| Atom    | X          | Y          | Z          |
|---------|------------|------------|------------|
| 1 C C1  | 2.3048106  | 2.4092042  | -0.5864680 |
| 2 C C2  | 1.0108544  | 3.0286131  | -0.1099256 |
| 3 C C3  | 1.1490726  | 1.4984560  | -0.2412288 |
| 4 H H6  | 1.2222529  | 0.9792168  | 0.7127076  |
| 5 C C10 | 0.4445181  | 0.7295535  | -1.2897008 |
| 6 H H11 | 0.3984581  | 1.1837849  | -2.2796021 |
| 7 C C11 | -0.1134805 | -0.4698449 | -1.1048238 |
| 8 H H2  | 1.0063096  | 3.3831285  | 0.9192383  |

|    |   |     |            |            |            |
|----|---|-----|------------|------------|------------|
| 9  | H | H15 | -0.6121377 | -0.9965488 | -1.9132536 |
| 10 | C | C4  | 0.1658656  | 3.8275133  | -1.0234979 |
| 11 | C | C6  | -0.5814338 | 4.8690025  | -0.6480115 |
| 12 | H | H1  | -0.6234135 | 5.2003890  | 0.3875069  |
| 13 | H | H13 | -1.1781026 | 5.4289125  | -1.3622669 |
| 14 | H | H17 | 0.1764772  | 3.5403149  | -2.0750644 |
| 15 | F | F1  | 3.4004749  | 2.4366523  | 0.2570101  |
| 16 | F | F2  | 2.6204377  | 2.5523160  | -1.9253435 |
| 17 | C | C5  | -0.0825019 | -1.1733032 | 0.2546422  |
| 18 | H | H3  | 0.9579973  | -1.3315565 | 0.5604743  |
| 19 | H | H5  | -0.5916635 | -0.5511894 | 0.9995885  |
| 20 | C | C7  | -0.7937486 | -2.5247270 | 0.1462784  |
| 21 | H | H4  | -0.2845874 | -3.1468413 | -0.5986678 |
| 22 | H | H7  | -1.8342478 | -2.3664734 | -0.1595536 |
| 23 | C | C8  | -0.7627709 | -3.2281848 | 1.5057446  |
| 24 | H | H8  | 0.2777281  | -3.3864388 | 1.8115770  |
| 25 | H | H10 | -1.2719322 | -2.6060704 | 2.2506905  |
| 26 | C | C9  | -1.4740185 | -4.5796082 | 1.3973810  |
| 27 | H | H9  | -0.9648575 | -5.2017231 | 0.6524352  |
| 28 | H | H12 | -2.5145175 | -4.4213540 | 1.0915487  |
| 29 | H | H14 | -1.4518430 | -5.0831936 | 2.3705850  |

### Erbes and Boland VCPR TS

Gaussian'09: B3LYP/6-31G\*, G = -628.163404, iv = i262, S<sup>2</sup> = 0.7753

Cartesian Coordinates (Angstroms)

| Atom     | X          | Y          | Z          |
|----------|------------|------------|------------|
| 1 C C    | 0.1797769  | 2.4851927  | -1.7655285 |
| 2 C C2   | -0.9439639 | 1.7209381  | -1.7531359 |
| 3 C C3   | -0.9491965 | 0.4305106  | -1.1524093 |
| 4 C C4   | 1.4649215  | 1.8489004  | -1.3421135 |
| 5 C C5   | 1.5881396  | 0.4198029  | -1.7923096 |
| 6 H H    | 0.2052781  | 3.5166479  | -2.1001947 |
| 7 H H7   | -1.8549081 | 2.0559026  | -2.2452659 |
| 8 H H12  | 1.1815084  | 0.1887807  | -2.7706469 |
| 9 F F1   | 2.5279271  | 2.5825422  | -1.8433748 |
| 10 F F2  | 1.6191634  | 1.9073752  | 0.0413634  |
| 11 C C1  | 2.4997100  | -0.4644860 | -1.1820841 |
| 12 H H3  | 2.9522971  | -0.1411655 | -0.2469181 |
| 13 C C6  | 2.8111653  | -1.7003805 | -1.6762756 |
| 14 H H2  | 3.4993201  | -2.3607789 | -1.1585262 |
| 15 H H4  | 2.3740126  | -2.0681877 | -2.6010585 |
| 16 H H16 | -1.7373684 | -0.2135955 | -1.5598184 |
| 17 C C7  | -0.4063762 | -0.1645800 | 0.0803931  |
| 18 H H1  | 0.3309212  | 0.4487369  | 0.5844297  |
| 19 H H5  | 0.0334044  | -1.1397334 | -0.1532436 |
| 20 C C8  | -1.5525354 | -0.3853769 | 1.0822626  |
| 21 H H8  | -2.3197989 | -1.0295050 | 0.6341871  |
| 22 H H9  | -2.0358990 | 0.5747139  | 1.3037845  |
| 23 C C9  | -1.0461147 | -1.0194032 | 2.3778715  |
| 24 H H6  | -0.2876426 | -0.3746243 | 2.8368189  |
| 25 H H10 | -0.5660855 | -1.9803051 | 2.1590619  |
| 26 C C10 | -2.1775044 | -1.2408641 | 3.3689390  |

|    |   |     |            |            |           |
|----|---|-----|------------|------------|-----------|
| 27 | H | H11 | -1.7931010 | -1.6945214 | 4.2878153 |
| 28 | H | H13 | -2.9384534 | -1.9088238 | 2.9528676 |
| 29 | H | H14 | -2.6585977 | -0.2937128 | 3.6331091 |

### Erbes and Boland [3,3] TS

Gaussian'09: B3LYP/6-31G\*, G = -628.172483, iv = i284

Cartesian Coordinates (Angstroms)

|    | Atom | X   | Y          | Z          |            |
|----|------|-----|------------|------------|------------|
| 1  | C    | C1  | -0.7635387 | 1.2387820  | 2.6379056  |
| 2  | H    | H3  | -0.9712143 | 0.1953323  | 2.4383484  |
| 3  | C    | C2  | 0.5214959  | 1.6455185  | 2.9610528  |
| 4  | C    | C5  | 0.5149436  | 1.7746469  | -0.0281305 |
| 5  | H    | H7  | 0.6413982  | 2.7611400  | -0.4746427 |
| 6  | C    | C6  | -0.7712610 | 1.3484632  | 0.2653336  |
| 7  | C    | C3  | 1.6749619  | 1.1534769  | 0.4440985  |
| 8  | C    | C4  | 1.6800959  | 1.0703481  | 2.4308735  |
| 9  | C    | C11 | 1.6956791  | -0.0067176 | 1.3906396  |
| 10 | H    | H2  | 2.6396795  | 1.5699725  | 0.1427050  |
| 11 | H    | H10 | 2.6460830  | 1.4328050  | 2.7921912  |
| 12 | H    | H17 | -1.6195833 | 1.9563442  | -0.0370334 |
| 13 | H    | H1  | -1.6149759 | 1.8093846  | 2.9985664  |
| 14 | H    | H11 | 0.6397727  | 2.5236634  | 3.5908744  |
| 15 | F    | F1  | 0.5830745  | -0.8275205 | 1.3577380  |
| 16 | F    | F2  | 2.8511190  | -0.7659216 | 1.3551840  |
| 17 | C    | C7  | -1.2869475 | -0.1133111 | -0.2617409 |
| 18 | H    | H5  | -2.3310062 | 0.0417838  | -0.5682532 |
| 19 | H    | H6  | -1.3322165 | -0.8273506 | 0.5612621  |
| 20 | C    | C8  | -0.4980649 | -0.6330584 | -1.4586575 |
| 21 | H    | H4  | 0.5484327  | -0.7963460 | -1.1815678 |
| 22 | H    | H8  | -0.5024572 | 0.1240830  | -2.2517814 |
| 23 | C    | C9  | -1.0898539 | -1.9387801 | -1.9875949 |
| 24 | H    | H12 | -2.1338189 | -1.7826954 | -2.2833101 |
| 25 | H    | H13 | -1.0864397 | -2.6963103 | -1.1951802 |
| 26 | C    | C10 | -0.3067223 | -2.4618498 | -3.1811563 |
| 27 | H    | H9  | 0.7352312  | -2.6601956 | -2.9103080 |
| 28 | H    | H14 | -0.3167139 | -1.7397327 | -4.0038203 |
| 29 | H    | H15 | -0.7471530 | -3.3959545 | -3.5435962 |

### Gaich trans VCP SM (50)

Gaussian'09: B3LYP/6-31G\*, G = -1145.573154, iv = none

Cartesian Coordinates (Angstroms)

|   | Atom | X   | Y          | Z          |            |
|---|------|-----|------------|------------|------------|
| 1 | C    | C1  | 1.6197059  | -0.8005199 | -2.6549743 |
| 2 | C    | C2  | 0.5016609  | -0.3525236 | -1.8018160 |
| 3 | C    | C3  | 0.8278940  | -1.9065505 | -2.0489682 |
| 4 | H    | H3  | -0.3659227 | -0.0185463 | -2.3700799 |
| 5 | H    | H6  | 1.2947686  | -2.3804072 | -1.1892069 |
| 6 | C    | C10 | -0.0928219 | -2.7135757 | -2.8524589 |

|    |   |     |            |            |            |
|----|---|-----|------------|------------|------------|
| 7  | H | H11 | -0.4787172 | -2.2731209 | -3.7704171 |
| 8  | C | C11 | -0.5030457 | -3.9515410 | -2.5331951 |
| 9  | H | H12 | -0.1589228 | -4.4670044 | -1.6412409 |
| 10 | C | C4  | 0.6945669  | 0.2400464  | -0.4671944 |
| 11 | C | C5  | 1.7838202  | 0.8462710  | 0.1349866  |
| 12 | C | C6  | 1.3939455  | 1.2356385  | 1.4455614  |
| 13 | C | C7  | 0.0791243  | 0.8580797  | 1.6156185  |
| 14 | H | H1  | 2.7485014  | 0.9944472  | -0.3271107 |
| 15 | N | N1  | -0.3373923 | 0.2577674  | 0.4529992  |
| 16 | H | H4  | 2.6578182  | -0.6578100 | -2.3337691 |
| 17 | H | H7  | 1.5407672  | -0.6324651 | -3.7351328 |
| 18 | H | H10 | -1.1996851 | -4.4813017 | -3.1751735 |
| 19 | C | C8  | -0.5815492 | 1.1320459  | 2.8351548  |
| 20 | C | C12 | 1.4364990  | 2.1607410  | 3.6885985  |
| 21 | C | C13 | 2.0869119  | 1.8917182  | 2.4846385  |
| 22 | C | C14 | 0.1140458  | 1.7824750  | 3.8598686  |
| 23 | H | H13 | 3.1242060  | 2.1867092  | 2.3504244  |
| 24 | H | H14 | -0.3886491 | 1.9853945  | 4.8031395  |
| 25 | H | H16 | -1.6118828 | 0.8380517  | 3.0161146  |
| 26 | H | H18 | 1.9693372  | 2.6622921  | 4.4922558  |
| 27 | S | S1  | -2.0091027 | -0.0544889 | 0.1539555  |
| 28 | O | O1  | -2.1126963 | -0.8254080 | -1.0678739 |
| 29 | O | O2  | -2.5459969 | -0.5894233 | 1.3920482  |
| 30 | C | C9  | -2.7561756 | 1.5265115  | -0.1429219 |
| 31 | H | H2  | -2.2740572 | 1.9858205  | -1.0079086 |
| 32 | H | H5  | -2.6400932 | 2.1531404  | 0.7424699  |
| 33 | H | H8  | -3.8168623 | 1.3675366  | -0.3483918 |

### Gaich cis VCP SM (cis-50)

Gaussian'09: B3LYP/6-31G\*, G = -1145.574428, iv = none

Cartesian Coordinates (Angstroms)

| Atom     | X          | Y          | Z          |
|----------|------------|------------|------------|
| 1 C C1   | 0.5772912  | -2.0168209 | -2.6912849 |
| 2 C C2   | -0.4755920 | -1.4227026 | -1.8065477 |
| 3 C C3   | 0.1486847  | -0.6115404 | -2.9341770 |
| 4 H H6   | -0.5652451 | -0.4887302 | -3.7446853 |
| 5 C C10  | 1.0297737  | 0.5175099  | -2.6283467 |
| 6 H H11  | 1.8128888  | 0.3591332  | -1.8886099 |
| 7 C C11  | 0.9343620  | 1.7352010  | -3.1859273 |
| 8 H H12  | 0.1886167  | 1.9741007  | -3.9385868 |
| 9 C C4   | -0.1797073 | -1.0976278 | -0.3127173 |
| 10 C C5  | 0.8118500  | -1.6934701 | 0.4355737  |
| 11 C C6  | 0.7786294  | -1.1265360 | 1.7382202  |
| 12 C C7  | -0.2780851 | -0.2076168 | 1.7758048  |
| 13 H H1  | 1.5091388  | -2.4445218 | 0.0876724  |
| 14 N N1  | -0.8679872 | -0.2463571 | 0.5217833  |
| 15 H H4  | 0.3076245  | -2.7846842 | -3.4253706 |
| 16 H H7  | 1.5763829  | -2.1850111 | -2.3024834 |
| 17 H H10 | 1.6182629  | 2.5265533  | -2.8958751 |
| 18 C C8  | -0.5639331 | 0.5245644  | 2.9441336  |
| 19 C C12 | 1.2864664  | -0.5905565 | 4.0494810  |
| 20 C C13 | 1.5661520  | -1.3194300 | 2.8908299  |

|    |   |     |            |            |            |
|----|---|-----|------------|------------|------------|
| 21 | C | C14 | 0.2348618  | 0.3177570  | 4.0731321  |
| 22 | H | H13 | 2.3878390  | -2.0303952 | 2.8816971  |
| 23 | H | H14 | 0.0211906  | 0.8691525  | 4.9865939  |
| 24 | H | H16 | -1.3946649 | 1.2226822  | 3.0002371  |
| 25 | H | H18 | 1.8924320  | -0.7413470 | 4.9396372  |
| 26 | S | S1  | -2.1152702 | 0.8215448  | 0.0447368  |
| 27 | O | O1  | -2.5640956 | 0.3965081  | -1.2676831 |
| 28 | O | O2  | -3.0458025 | 0.8515416  | 1.1593617  |
| 29 | C | C9  | -1.3897601 | 2.4303800  | -0.1089514 |
| 30 | H | H2  | -0.5860389 | 2.3920360  | -0.8420049 |
| 31 | H | H5  | -1.0075041 | 2.7484702  | 0.8619686  |
| 32 | H | H8  | -2.1659855 | 3.1214365  | -0.4444398 |
| 33 | H | H9  | -1.4827759 | -1.8012238 | -1.9731721 |

Gaich cis VCPR TS 50

Gaussian'09: B3LYP/6-31G\*, G = -1145.512932, iv = i451, S<sup>2</sup> = 0.7540

Cartesian Coordinates (Angstroms)

|    | Atom | X   | Y          | Z          |            |
|----|------|-----|------------|------------|------------|
| 1  | C    | C   | -3.2306126 | 2.4446878  | 0.6697624  |
| 2  | C    | C2  | -4.2202822 | 1.5011075  | 0.6738103  |
| 3  | C    | C3  | -3.9420378 | 0.1216369  | 0.7867193  |
| 4  | C    | C4  | -1.8298021 | 1.9937313  | 0.5249219  |
| 5  | C    | C5  | -1.6742598 | 0.8913056  | -0.4753325 |
| 6  | H    | H   | -3.4311433 | 3.5154477  | 0.6530915  |
| 7  | H    | H7  | -5.2604059 | 1.7955217  | 0.5457293  |
| 8  | H    | H8  | -3.0671211 | -0.2330688 | 1.3138945  |
| 9  | H    | H12 | -2.4248628 | 0.8236220  | -1.2494718 |
| 10 | C    | C1  | -0.4596443 | 0.2321306  | -0.6776137 |
| 11 | C    | C6  | -0.2005191 | -0.4626763 | -1.8531098 |
| 12 | C    | C7  | 1.1697130  | -0.8601541 | -1.8616532 |
| 13 | C    | C8  | 1.7273980  | -0.4742062 | -0.6391548 |
| 14 | H    | H3  | -0.8602812 | -0.6009484 | -2.7062280 |
| 15 | N    | N1  | 0.6809631  | 0.0224647  | 0.0816724  |
| 16 | H    | H2  | -1.4017182 | 1.6667809  | 1.4794185  |
| 17 | H    | H4  | -1.1848019 | 2.8381787  | 0.2564089  |
| 18 | H    | H13 | -4.7016903 | -0.6156509 | 0.5029046  |
| 19 | C    | C9  | 3.0889678  | -0.6561729 | -0.3579910 |
| 20 | C    | C11 | 1.9799289  | -1.4934810 | -2.8204477 |
| 21 | C    | C12 | 3.3318649  | -1.6992840 | -2.5376187 |
| 22 | C    | C13 | 3.8768732  | -1.2773033 | -1.3304490 |
| 23 | H    | H1  | 3.5714265  | -0.3184691 | 0.5560382  |
| 24 | H    | H14 | 1.5919290  | -1.8166411 | -3.7863838 |
| 25 | H    | H15 | 3.9740948  | -2.1817240 | -3.2767897 |
| 26 | H    | H17 | 4.9426785  | -1.4328413 | -1.1485794 |
| 27 | S    | S1  | 0.5609192  | 0.0277857  | 1.7628150  |
| 28 | O    | O1  | 0.7534589  | 1.4339937  | 2.0410944  |
| 29 | O    | O2  | -0.8212567 | -0.4545720 | 1.8865347  |
| 30 | C    | C10 | 1.7027156  | -1.0271505 | 2.6098716  |
| 31 | H    | H5  | 2.7004349  | -0.5918645 | 2.5708941  |
| 32 | H    | H6  | 1.6764925  | -2.0178412 | 2.1536728  |
| 33 | H    | H9  | 1.3805806  | -1.0943451 | 3.6515687  |

## Gaich cis [3,3] TS

Gaussian'09: B3LYP/6-31G\*, G = -1145.535705, iv = i388

Cartesian Coordinates (Angstroms)

| Atom     | X          | Y          | Z          |
|----------|------------|------------|------------|
| 1 C C1   | -0.5354495 | -0.9954063 | -0.6005013 |
| 2 H H3   | -0.6066520 | -2.0631530 | -0.7723441 |
| 3 C C2   | 0.7837370  | -0.5430534 | -0.1823152 |
| 4 C C5   | 0.5332369  | -0.1362140 | -3.0944368 |
| 5 H H7   | 0.5127026  | 0.8715480  | -3.5066809 |
| 6 C C6   | -0.6930158 | -0.6444662 | -2.5707256 |
| 7 H H6   | -0.9282083 | -1.6827987 | -2.7742534 |
| 8 C C3   | 1.7525154  | -0.7429426 | -2.9246180 |
| 9 C C4   | 1.9459117  | -1.0599260 | -0.7440129 |
| 10 C C11 | 1.9810344  | -1.8681167 | -1.9859001 |
| 11 H H2  | 2.6585646  | -0.2828496 | -3.3108351 |
| 12 H H10 | 2.9153312  | -0.6781863 | -0.4285817 |
| 13 C C9  | -1.5088898 | -0.2812568 | 0.1619200  |
| 14 C C8  | -0.8226449 | 0.6792747  | 0.7617455  |
| 15 N N2  | 0.5383226  | 0.6398357  | 0.6569621  |
| 16 H H11 | -1.5487914 | 0.0329326  | -2.6707005 |
| 17 H H16 | 1.2454242  | -2.6784578 | -2.0445588 |
| 18 H H17 | 2.9656358  | -2.3250472 | -2.1375266 |
| 19 C C7  | -2.9003677 | -0.4601979 | 0.3202661  |
| 20 C C12 | -1.5704315 | 1.6188409  | 1.5337430  |
| 21 C C13 | -2.9562851 | 1.4943808  | 1.6866126  |
| 22 C C14 | -3.6226375 | 0.4435674  | 1.0905411  |
| 23 H H1  | -3.4073908 | -1.2784191 | -0.1831761 |
| 24 H H13 | -1.0869852 | 2.4573567  | 2.0308196  |
| 25 H H14 | -3.5021339 | 2.2237180  | 2.2799495  |
| 26 H H18 | -4.6966160 | 0.3318542  | 1.2055523  |
| 27 S S1  | 1.6919267  | 1.3908105  | 1.6402702  |
| 28 O O1  | 2.9810173  | 1.1549805  | 1.0178166  |
| 29 O O2  | 1.2241193  | 2.7472334  | 1.8558173  |
| 30 C C10 | 1.6640816  | 0.5328646  | 3.1908993  |
| 31 H H4  | 2.4112996  | 0.9875830  | 3.8445906  |
| 32 H H5  | 1.9092720  | -0.5166522 | 3.0180000  |
| 33 H H8  | 0.6723665  | 0.6303628  | 3.6356613  |

## Sustmann VCP INT (51)

Gaussian'09: B3LYP/6-31G\*, G = -888.147718, iv = none

Cartesian Coordinates (Angstroms)

| Atom   | X         | Y          | Z          |
|--------|-----------|------------|------------|
| 1 C C1 | 2.3755578 | 0.2955231  | -0.2584893 |
| 2 C C2 | 1.2437991 | 1.0453606  | 0.3458963  |
| 3 C C3 | 1.3323679 | -0.5400432 | 0.4099371  |
| 4 H H6 | 1.6293956 | -0.9742177 | 1.3626546  |
| 5 C C4 | 1.4964683 | 1.7754558  | 1.6444639  |
| 6 C C5 | 1.8975463 | 3.2280305  | 4.0133341  |

|    |   |     |            |            |            |
|----|---|-----|------------|------------|------------|
| 7  | C | C6  | 0.8125100  | 1.4295389  | 2.8153903  |
| 8  | C | C7  | 2.3868173  | 2.8567642  | 1.6736107  |
| 9  | C | C8  | 2.5863915  | 3.5777389  | 2.8501506  |
| 10 | C | C9  | 1.0098482  | 2.1516013  | 3.9932360  |
| 11 | H | H4  | 0.1036468  | 0.6053497  | 2.8103845  |
| 12 | H | H7  | 2.9165295  | 3.1509523  | 0.7712183  |
| 13 | H | H8  | 3.2746411  | 4.4187474  | 2.8602973  |
| 14 | H | H9  | 0.4670704  | 1.8787003  | 4.8943076  |
| 15 | C | C10 | 0.4351634  | -1.3920948 | -0.3825193 |
| 16 | H | H11 | 0.2058968  | -1.0547255 | -1.3920468 |
| 17 | C | C11 | -0.0839051 | -2.5499123 | 0.0539730  |
| 18 | H | H12 | 0.1640927  | -2.9173582 | 1.0465816  |
| 19 | H | H16 | 2.0497456  | 3.7930719  | 4.9286282  |
| 20 | C | C14 | 0.2132182  | 1.6866706  | -0.5526569 |
| 21 | C | C15 | -1.7178629 | 2.9752724  | -2.1327952 |
| 22 | C | C16 | -1.1528020 | 1.5122024  | -0.2929265 |
| 23 | C | C17 | 0.6003696  | 2.5164918  | -1.6128682 |
| 24 | C | C18 | -0.3601727 | 3.1563232  | -2.3974298 |
| 25 | C | C19 | -2.1121947 | 2.1501502  | -1.0775961 |
| 26 | H | H2  | -1.4740149 | 0.8847489  | 0.5348762  |
| 27 | H | H1  | 1.6540170  | 2.6825218  | -1.8205484 |
| 28 | H | H3  | -0.0491263 | 3.8026883  | -3.2139870 |
| 29 | H | H10 | -3.1683130 | 2.0104767  | -0.8629331 |
| 30 | H | H15 | -2.4648964 | 3.4766167  | -2.7418699 |
| 31 | H | H17 | 3.3513352  | 0.3428039  | 0.2164551  |
| 32 | H | H18 | 2.4593056  | 0.2393659  | -1.3395042 |
| 33 | C | C12 | -0.9860671 | -3.3988915 | -0.7362677 |
| 34 | C | C13 | -2.7262649 | -5.0860924 | -2.1560505 |
| 35 | C | C20 | -1.9629416 | -2.8637967 | -1.5869450 |
| 36 | C | C21 | -0.9080837 | -4.7900142 | -0.5908611 |
| 37 | C | C22 | -1.7697516 | -5.6296747 | -1.3013609 |
| 38 | C | C23 | -2.8248758 | -3.7035835 | -2.2971076 |
| 39 | H | H5  | -2.0707841 | -1.7874104 | -1.6994879 |
| 40 | H | H13 | -0.1679214 | -5.2335634 | 0.0711705  |
| 41 | H | H14 | -1.6932297 | -6.7074940 | -1.1856945 |
| 42 | H | H19 | -3.5754602 | -3.2756175 | -2.9563243 |
| 43 | H | H20 | -3.3970656 | -5.7386774 | -2.7082956 |

## Sustmann VCPR TS

Gaussian'09: B3LYP/6-31G\*, G = -888.098339, iv = i201, S<sup>2</sup> = 0.6849

Cartesian Coordinates (Angstroms)

|    | Atom | X          | Y          | Z          |
|----|------|------------|------------|------------|
| 1  | C C  | -0.0269135 | 3.0322724  | 0.3651644  |
| 2  | C C2 | -1.2103563 | 2.3679144  | 0.2763010  |
| 3  | C C3 | -1.3598391 | 1.0609182  | 0.8066873  |
| 4  | C C4 | 1.1643584  | 2.2883003  | 0.8799909  |
| 5  | C C5 | 1.2656103  | 0.8437567  | 0.3874205  |
| 6  | H H  | 0.1194959  | 4.0502385  | 0.0037539  |
| 7  | H H7 | -2.0512600 | 2.8004308  | -0.2622636 |
| 8  | H H8 | -0.8618118 | 0.7599148  | 1.7159615  |
| 9  | C C1 | 1.8909915  | -0.1792479 | 1.2367267  |
| 10 | C C6 | 3.1268072  | -2.1941215 | 2.8018338  |



|    |   |     |            |            |            |
|----|---|-----|------------|------------|------------|
| 11 | C | C7  | 2.8555473  | -1.0583675 | 0.6862312  |
| 12 | C | C8  | 1.5786590  | -0.3413779 | 2.6086037  |
| 13 | C | C9  | 2.1831999  | -1.3353085 | 3.3704229  |
| 14 | C | C10 | 3.4634290  | -2.0451617 | 1.4550234  |
| 15 | H | H2  | 3.2210392  | -0.9799177 | -0.3384494 |
| 16 | H | H6  | 0.8868435  | 0.2999722  | 3.1447167  |
| 17 | H | H5  | 1.9531260  | -1.4530058 | 4.4328034  |
| 18 | H | H3  | 4.2224089  | -2.7040790 | 1.0248655  |
| 19 | H | H4  | 3.6127696  | -2.9629314 | 3.4072836  |
| 20 | C | C13 | 1.1695655  | 0.6288107  | -1.0564075 |
| 21 | C | C14 | 0.8724646  | 0.1772572  | -3.8342089 |
| 22 | C | C15 | 1.3872637  | 1.6643669  | -1.9941773 |
| 23 | C | C16 | 0.8072404  | -0.6456949 | -1.5612241 |
| 24 | C | C17 | 0.6575959  | -0.8646435 | -2.9225151 |
| 25 | C | C18 | 1.2380126  | 1.4360556  | -3.3620031 |
| 26 | H | H11 | 1.8179670  | 2.6327972  | -1.7364651 |
| 27 | H | H12 | 0.6492528  | -1.5164453 | -0.9209106 |
| 28 | H | H13 | 0.4119018  | -1.8580422 | -3.3112913 |
| 29 | H | H14 | 1.4735600  | 2.2149849  | -4.0950196 |
| 30 | H | H15 | 0.7975208  | -0.0117358 | -4.9092232 |
| 31 | H | H16 | 1.1167981  | 2.3143977  | 1.9749587  |
| 32 | H | H17 | 2.0788858  | 2.8248769  | 0.5980375  |
| 33 | C | C11 | -2.5255896 | 0.0640594  | 0.3526260  |
| 34 | C | C12 | -4.4846969 | -1.7852412 | -0.3841672 |
| 35 | C | C19 | -3.3685840 | 0.3320269  | -0.7365100 |
| 36 | C | C20 | -2.6731429 | -1.1355713 | 1.0686093  |
| 37 | C | C21 | -3.6530577 | -2.0555931 | 0.6977398  |
| 38 | C | C22 | -4.3461298 | -0.5980304 | -1.0985063 |
| 39 | H | H1  | -3.3329778 | 1.2302020  | -1.3474036 |
| 40 | H | H9  | -2.0583888 | -1.3923795 | 1.9312546  |
| 41 | H | H10 | -3.7896071 | -2.9892860 | 1.2506341  |
| 42 | H | H18 | -5.0219184 | -0.4118401 | -1.9386429 |
| 43 | H | H19 | -5.2580407 | -2.5055313 | -0.6682614 |

### Sustmann [3,3] TS

Gaussian'09: B3LYP/6-31G\*, G = -888.090641, iv = i385

Cartesian Coordinates (Angstroms)

| Atom     | X          | Y          | Z          |
|----------|------------|------------|------------|
| -----    | -----      | -----      | -----      |
| 1 C C1   | -1.2158865 | -0.8522870 | 0.6734974  |
| 2 H H3   | -1.3659523 | -1.9166506 | 0.5611198  |
| 3 C C2   | 0.1150097  | -0.4688105 | 1.1492486  |
| 4 C C5   | 0.0978896  | -0.3876310 | -1.8956387 |
| 5 H H7   | 0.1774585  | 0.5334981  | -2.4694213 |
| 6 C C6   | -1.2103261 | -0.7329575 | -1.4271119 |
| 7 H H6   | -1.4932838 | -1.7755982 | -1.4772134 |
| 8 C C7   | 0.2240385  | 0.6918035  | 1.9983036  |
| 9 H H4   | 1.2171496  | 1.0043791  | 2.3117403  |
| 10 C C8  | -0.8770135 | 1.3972592  | 2.3822541  |
| 11 H H9  | -0.7685821 | 2.2777066  | 3.0096368  |
| 12 C C9  | -2.1886048 | 0.9813351  | 1.9764615  |
| 13 H H11 | -3.0535724 | 1.5319291  | 2.3363479  |
| 14 C C10 | -2.3519991 | -0.1175903 | 1.1885447  |

|    |   |     |            |            |            |
|----|---|-----|------------|------------|------------|
| 15 | H | H12 | -3.3447091 | -0.4637382 | 0.9187841  |
| 16 | C | C3  | 1.2469468  | -1.0393722 | -1.5551573 |
| 17 | C | C4  | 1.2607021  | -1.1104314 | 0.7250007  |
| 18 | C | C11 | 1.3457780  | -2.0311061 | -0.4447914 |
| 19 | H | H2  | 2.2062929  | -0.6862884 | -1.9217102 |
| 20 | H | H13 | 0.5763900  | -2.8114049 | -0.4645882 |
| 21 | H | H14 | 2.3145953  | -2.5432517 | -0.4625649 |
| 22 | C | C14 | 2.6763274  | -0.7228923 | 1.2349276  |
| 23 | C | C15 | 5.2516079  | -0.0650837 | 2.1853548  |
| 24 | C | C16 | 3.2742115  | -1.4487114 | 2.2797424  |
| 25 | C | C17 | 3.4072101  | 0.3442956  | 0.6815639  |
| 26 | C | C18 | 4.6813961  | 0.6713438  | 1.1505058  |
| 27 | C | C19 | 4.5482476  | -1.1250240 | 2.7515672  |
| 28 | H | H10 | 2.7323243  | -2.2771313 | 2.7313969  |
| 29 | H | H15 | 2.9668480  | 0.9359623  | -0.1181157 |
| 30 | H | H16 | 5.2249259  | 1.5026153  | 0.7094284  |
| 31 | H | H17 | 4.9883312  | -1.7004903 | 3.5615061  |
| 32 | H | H18 | 6.2423913  | 0.1887231  | 2.5524460  |
| 33 | C | C12 | -2.3385948 | 0.1661957  | -1.9295166 |
| 34 | C | C13 | -4.4027784 | 1.7976193  | -2.8176402 |
| 35 | C | C20 | -2.2398596 | 1.5472552  | -1.7738149 |
| 36 | C | C21 | -3.4616944 | -0.4095593 | -2.5177089 |
| 37 | C | C22 | -4.4965870 | 0.4116445  | -2.9657211 |
| 38 | C | C23 | -3.2759898 | 2.3659111  | -2.2200140 |
| 39 | H | H1  | -1.3679619 | 1.9698680  | -1.2846959 |
| 40 | H | H5  | -3.5283929 | -1.4856102 | -2.6323173 |
| 41 | H | H8  | -5.3756705 | -0.0270590 | -3.4301205 |
| 42 | H | H19 | -3.2076139 | 3.4431710  | -2.0960297 |
| 43 | H | H20 | -5.2109992 | 2.4361639  | -3.1654863 |

### Ichikawa VCP INT (52)

Gaussian'09: B3LYP/6-31G\*, G = -1108.506583, iv = none

Cartesian Coordinates (Angstroms)

| Atom    | X          | Y          | Z          |
|---------|------------|------------|------------|
| 1 C C1  | 2.2910281  | 2.0104097  | -1.1886598 |
| 2 C C2  | 1.1414659  | 2.7184398  | -0.6052825 |
| 3 C C3  | 1.2667689  | 1.1588629  | -0.5050026 |
| 4 C C10 | 0.3642447  | 0.3076408  | -1.2924739 |
| 5 H H11 | 0.0800168  | 0.6873774  | -2.2712185 |
| 6 C C11 | -0.1509008 | -0.8557149 | -0.8695280 |
| 7 H H12 | 0.1025203  | -1.2572522 | 0.1062422  |
| 8 C C4  | -1.0821648 | -1.6724113 | -1.6593521 |
| 9 C C5  | -2.8682629 | -3.3006439 | -3.0877385 |
| 10 C C6 | -0.9100064 | -1.8836438 | -3.0334648 |
| 11 C C7 | -2.1480908 | -2.3047403 | -1.0065605 |
| 12 C C8 | -3.0403695 | -3.1103883 | -1.7182796 |
| 13 C C9 | -1.8020244 | -2.6901298 | -3.7449847 |
| 14 H H3 | -0.0731336 | -1.4334427 | -3.5615838 |
| 15 H H4 | -2.2975245 | -2.1679229 | 0.0620295  |
| 16 H H5 | -3.8678956 | -3.5900222 | -1.2022587 |
| 17 H H7 | -1.6594109 | -2.8458606 | -4.8111041 |
| 18 H H8 | -3.5610375 | -3.9289132 | -3.6413769 |

|    |    |     |            |            |            |
|----|----|-----|------------|------------|------------|
| 19 | H  | H9  | 1.3255102  | 3.3309280  | 0.2670203  |
| 20 | H  | H10 | 0.3916141  | 3.1226335  | -1.2753837 |
| 21 | O  | O1  | 1.7880427  | 0.6696859  | 0.7730615  |
| 22 | Si | Si1 | 0.9911971  | 0.9088461  | 2.2335392  |
| 23 | C  | C12 | 1.0619693  | -0.6762027 | 3.2549177  |
| 24 | H  | H13 | 2.1006089  | -0.9713172 | 3.4299155  |
| 25 | H  | H15 | 0.5540851  | -1.4914534 | 2.7316314  |
| 26 | H  | H16 | 0.5751629  | -0.5302304 | 4.2235639  |
| 27 | C  | C13 | -0.8176967 | 1.3790454  | 2.0350855  |
| 28 | H  | H6  | -1.2795211 | 1.5279189  | 3.0159549  |
| 29 | H  | H17 | -1.3734971 | 0.5922526  | 1.5178984  |
| 30 | H  | H18 | -0.9244139 | 2.3079912  | 1.4682959  |
| 31 | C  | C14 | 1.8461939  | 2.2653271  | 3.2230294  |
| 32 | H  | H14 | 2.8988511  | 2.0148413  | 3.3836261  |
| 33 | H  | H19 | 1.3676965  | 2.3868878  | 4.1992625  |
| 34 | H  | H20 | 1.7962275  | 3.2212932  | 2.6945525  |
| 35 | F  | F1  | 3.5239867  | 2.1531621  | -0.5786402 |
| 36 | F  | F2  | 2.3887598  | 1.9467462  | -2.5667325 |

### Ichikawa VCPR TS

Gaussian'09: B3LYP/6-31G\* using scf=(qcverytight) and  
 guess=(mix,always,densitymix) in input line, G = -1108.460735, iv =  
 i109, S^2 = 0.79

Cartesian Coordinates (Angstroms)

|    | Atom   | X          | Y          | Z          |
|----|--------|------------|------------|------------|
| 1  | C C    | 1.9137391  | 1.1672811  | 0.4623618  |
| 2  | C C2   | 0.7982840  | 0.3787391  | 0.4386759  |
| 3  | C C3   | 0.7719369  | -0.8931799 | 1.0544091  |
| 4  | C C4   | 3.1968266  | 0.5748901  | 0.9540772  |
| 5  | C C5   | 3.4120343  | -0.8159359 | 0.4684891  |
| 6  | H H    | 1.9254320  | 2.1927805  | 0.1088231  |
| 7  | H H8   | 1.4043016  | -1.1230086 | 1.9018355  |
| 8  | H H12  | 3.0581443  | -1.0949354 | -0.5151967 |
| 9  | H H4   | 4.2350300  | -1.3872942 | 0.9128354  |
| 10 | O O3   | -0.3890101 | 0.7109659  | -0.1542352 |
| 11 | Si Si1 | -0.7786309 | 2.1508656  | -0.9389403 |
| 12 | C C1   | -0.6701825 | 3.5884769  | 0.2476550  |
| 13 | H H7   | -1.3026780 | 3.4129458  | 1.1232011  |
| 14 | H H11  | -1.0122807 | 4.5094809  | -0.2345161 |
| 15 | H H13  | 0.3508105  | 3.7575846  | 0.5985019  |
| 16 | C C6   | 0.3729825  | 2.4152865  | -2.3902891 |
| 17 | H H5   | 0.3692404  | 1.5399622  | -3.0469016 |
| 18 | H H14  | 1.4026811  | 2.5957345  | -2.0723966 |
| 19 | H H15  | 0.0509264  | 3.2797206  | -2.9791621 |
| 20 | C C7   | -2.5316834 | 2.0200185  | -1.5819238 |
| 21 | H H6   | -3.2343665 | 1.8577902  | -0.7591750 |
| 22 | H H16  | -2.6260887 | 1.1830513  | -2.2802412 |
| 23 | H H17  | -2.8233725 | 2.9357156  | -2.1047400 |
| 24 | C C8   | -0.3347065 | -2.0859988 | 0.8493571  |
| 25 | C C9   | -2.1173226 | -4.2323675 | 0.6236915  |
| 26 | C C10  | -1.3177024 | -2.0818909 | -0.1502703 |
| 27 | C C11  | -0.2485493 | -3.1829850 | 1.7262542  |

|    |   |     |            |            |            |
|----|---|-----|------------|------------|------------|
| 28 | C | C12 | -1.1408365 | -4.2489898 | 1.6126115  |
| 29 | C | C13 | -2.2062767 | -3.1567098 | -0.2549064 |
| 30 | H | H1  | -1.4565368 | -1.3088833 | -0.8971375 |
| 31 | H | H9  | 0.4835660  | -3.2459843 | 2.5313231  |
| 32 | H | H10 | -1.0931269 | -5.1014248 | 2.2961903  |
| 33 | H | H18 | -2.9836290 | -3.1763755 | -1.0247698 |
| 34 | H | H19 | -2.8191322 | -5.0675515 | 0.5381456  |
| 35 | F | F1  | 4.2306300  | 1.3778540  | 0.6270610  |
| 36 | F | F2  | 3.1095464  | 0.5543711  | 2.3093024  |

## Hammett Plot

### p\_NMe2\_SM (S1a)

G = -986.405584

iv = none

Cartesian Coordinates (Angstroms)

| Atom     | X          | Y          | Z          |
|----------|------------|------------|------------|
| 1 C C1   | 1.5584825  | 0.1025224  | -2.3886327 |
| 2 C C2   | 0.4103350  | 0.6021148  | -1.6087786 |
| 3 C C3   | 0.6679862  | -0.9553396 | -1.8292907 |
| 4 H H3   | -0.3986704 | 0.9730780  | -2.2377576 |
| 5 H H6   | 1.0586619  | -1.4515965 | -0.9442274 |
| 6 C C4   | 0.5001002  | 1.1869267  | -0.2380093 |
| 7 C C5   | 0.5732065  | 2.3190323  | 2.3824332  |
| 8 C C6   | -0.5615688 | 1.0151570  | 0.6614430  |
| 9 C C7   | 1.6000107  | 1.9356895  | 0.1982475  |
| 10 C C8  | 1.6435293  | 2.4858832  | 1.4755522  |
| 11 C C9  | -0.5345924 | 1.5585553  | 1.9391770  |
| 12 H H4  | -1.4287926 | 0.4329341  | 0.3574701  |
| 13 H H7  | 2.4449454  | 2.0864268  | -0.4648848 |
| 14 H H8  | 2.5221955  | 3.0502945  | 1.7635900  |
| 15 H H9  | -1.3797019 | 1.3873351  | 2.5950487  |
| 16 C C10 | -0.2340745 | -1.7296817 | -2.6860464 |
| 17 H H11 | -0.5575400 | -1.2745917 | -3.6205935 |
| 18 C C11 | -0.6941664 | -2.9563111 | -2.3925762 |
| 19 H H12 | -0.4109535 | -3.4788213 | -1.4834960 |
| 20 C C12 | -1.6147289 | -3.6494885 | -3.3153280 |
| 21 O O1  | -2.0354075 | -3.2116057 | -4.3698009 |
| 22 O O2  | -1.9500367 | -4.8718127 | -2.8302762 |
| 23 C C13 | -2.8426018 | -5.6310552 | -3.6570646 |
| 24 H H5  | -3.7770573 | -5.0862991 | -3.8173613 |
| 25 H H13 | -3.0270436 | -6.5595776 | -3.1153547 |
| 26 H H14 | -2.3854629 | -5.8382771 | -4.6289032 |
| 27 F F1  | 1.5632782  | 0.3054300  | -3.7284662 |
| 28 F F2  | 2.8228242  | 0.2003465  | -1.9124621 |
| 29 N N1  | 0.6028731  | 2.8829986  | 3.6510640  |
| 30 C C14 | 1.8395244  | 3.4710273  | 4.1367540  |
| 31 H H1  | 2.1484069  | 4.3141581  | 3.5067625  |
| 32 H H10 | 2.6710701  | 2.7489363  | 4.1695523  |
| 33 H H15 | 1.6805189  | 3.8558945  | 5.1459552  |
| 34 C C15 | -0.4124265 | 2.5103263  | 4.6210870  |
| 35 H H2  | -0.2419652 | 3.0633957  | 5.5468705  |

|      |     |            |           |           |
|------|-----|------------|-----------|-----------|
| 36 H | H16 | -0.4061960 | 1.4336214 | 4.8563569 |
| 37 H | H17 | -1.4149619 | 2.7723735 | 4.2619463 |

### NMe2\_TS2 (S-TS1a)

G = -986.371766

iv = i75

S<sup>2</sup> = 0.4500

|       |     | Cartesian Coordinates (Angstroms) |            |            |
|-------|-----|-----------------------------------|------------|------------|
| Atom  |     | X                                 | Y          | Z          |
| ----- |     | -----                             | -----      | -----      |
| 1 C   | C   | -1.7257165                        | 3.6608005  | -1.0708224 |
| 2 C   | C2  | -2.8870564                        | 2.9448482  | -1.1483783 |
| 3 C   | C3  | -3.0524220                        | 1.7261259  | -0.4506724 |
| 4 C   | C4  | -0.5565938                        | 3.0194769  | -0.4159069 |
| 5 C   | C5  | -0.3836554                        | 1.5979954  | -0.8610707 |
| 6 H   | H   | -1.6022001                        | 4.6557693  | -1.4838963 |
| 7 H   | H7  | -3.6991650                        | 3.2728347  | -1.7948143 |
| 8 H   | H8  | -2.5315502                        | 1.5364955  | 0.4779677  |
| 9 H   | H12 | -0.8743979                        | 1.3410869  | -1.7900136 |
| 10 F  | F1  | 0.5982312                         | 3.7432144  | -0.6825366 |
| 11 F  | F2  | -0.6580277                        | 3.0804251  | 0.9893451  |
| 12 C  | C1  | 0.6067414                         | 0.7159363  | -0.3745757 |
| 13 C  | C6  | 2.5419146                         | -1.1846315 | 0.5589313  |
| 14 C  | C7  | 0.8259172                         | -0.5246276 | -1.0369708 |
| 15 C  | C8  | 1.4021316                         | 0.9650054  | 0.7809334  |
| 16 C  | C9  | 2.3374050                         | 0.0555558  | 1.2252386  |
| 17 C  | C10 | 1.7498539                         | -1.4449934 | -0.5932123 |
| 18 H  | H2  | 0.2369406                         | -0.7532016 | -1.9219840 |
| 19 H  | H6  | 1.2651172                         | 1.8922670  | 1.3235701  |
| 20 H  | H5  | 2.9141905                         | 0.2991633  | 2.1095642  |
| 21 H  | H3  | 1.8633518                         | -2.3748420 | -1.1375105 |
| 22 C  | C11 | -4.0928551                        | 0.7828418  | -0.8453818 |
| 23 O  | O1  | -4.8594126                        | 0.9119027  | -1.7888919 |
| 24 O  | O2  | -4.1147561                        | -0.3020953 | -0.0188599 |
| 25 C  | C12 | -5.0906560                        | -1.2947775 | -0.3485181 |
| 26 H  | H1  | -6.1040563                        | -0.8931400 | -0.2514844 |
| 27 H  | H9  | -4.9354454                        | -2.1081869 | 0.3623164  |
| 28 H  | H10 | -4.9537390                        | -1.6503536 | -1.3741766 |
| 29 N  | N1  | 3.4629040                         | -2.0964084 | 1.0116655  |
| 30 C  | C13 | 3.6322520                         | -3.3693753 | 0.3261360  |
| 31 H  | H4  | 4.4017447                         | -3.9509484 | 0.8352652  |
| 32 H  | H13 | 3.9474534                         | -3.2280999 | -0.7162523 |
| 33 H  | H14 | 2.7040599                         | -3.9568964 | 0.3266268  |
| 34 C  | C14 | 4.2471670                         | -1.8172132 | 2.2061765  |
| 35 H  | H11 | 4.9151404                         | -2.6574804 | 2.3998742  |
| 36 H  | H15 | 3.6075847                         | -1.6789864 | 3.0885939  |
| 37 H  | H16 | 4.8616043                         | -0.9154872 | 2.0837247  |

## pNH2\_SM (S1b)

G = -907.846024

iv = none

Cartesian Coordinates (Angstroms)

| Atom     | X          | Y          | Z          |
|----------|------------|------------|------------|
| 1 C C1   | 1.6851610  | 0.1319418  | -1.5815304 |
| 2 C C2   | 0.6384108  | 0.9359312  | -0.9216993 |
| 3 C C3   | 0.6730599  | -0.6463225 | -0.8066263 |
| 4 H H3   | -0.1322477 | 1.2860880  | -1.6088658 |
| 5 H H6   | 1.0203339  | -0.9992078 | 0.1615377  |
| 6 C C4   | 0.8805428  | 1.7764293  | 0.2902526  |
| 7 C C5   | 1.2586871  | 3.4160653  | 2.5710386  |
| 8 C C6   | -0.0743025 | 1.8211479  | 1.3164424  |
| 9 C C7   | 2.0281729  | 2.5685850  | 0.4268111  |
| 10 C C8  | 2.2176801  | 3.3742094  | 1.5456268  |
| 11 C C9  | 0.1049242  | 2.6230367  | 2.4372474  |
| 12 H H4  | -0.9719102 | 1.2120028  | 1.2378336  |
| 13 H H7  | 2.7894641  | 2.5492299  | -0.3465061 |
| 14 H H8  | 3.1164852  | 3.9816222  | 1.6268973  |
| 15 H H9  | -0.6525406 | 2.6419044  | 3.2180763  |
| 16 C C10 | -0.3479446 | -1.4519089 | -1.4842468 |
| 17 H H11 | -0.6428478 | -1.1489419 | -2.4876272 |
| 18 C C11 | -0.9455504 | -2.5303317 | -0.9540096 |
| 19 H H12 | -0.7023801 | -2.9010621 | 0.0376269  |
| 20 C C12 | -1.9715553 | -3.2674690 | -1.7192850 |
| 21 O O1  | -2.3657116 | -2.9917879 | -2.8367407 |
| 22 O O2  | -2.4387865 | -4.3209899 | -1.0030180 |
| 23 C C13 | -3.4418486 | -5.1077992 | -1.6601821 |
| 24 H H5  | -4.2967329 | -4.4869973 | -1.9414600 |
| 25 H H13 | -3.7395441 | -5.8681781 | -0.9370796 |
| 26 H H14 | -3.0349725 | -5.5754868 | -2.5614979 |
| 27 F F1  | 1.6792664  | 0.0435328  | -2.9332927 |
| 28 F F2  | 2.9618784  | 0.1596004  | -1.1329688 |
| 29 N N1  | 1.4187425  | 4.2650383  | 3.6670814  |
| 30 H H2  | 0.9101470  | 3.9942771  | 4.4993782  |
| 31 H H1  | 2.3759190  | 4.5158404  | 3.8807859  |

## pNH2\_TS2 (S-TS1b)

G = -907.811148

iv = i93

S<sup>2</sup> = 0.4444

Cartesian Coordinates (Angstroms)

| Atom   | X          | Y         | Z          |
|--------|------------|-----------|------------|
| 1 C C  | -1.0033632 | 3.1014530 | -0.7660046 |
| 2 C C2 | -2.1485900 | 2.3610330 | -0.8316443 |
| 3 C C3 | -2.2708494 | 1.1339810 | -0.1359989 |
| 4 C C4 | 0.1839831  | 2.4738482 | -0.1310559 |
| 5 C C5 | 0.3705269  | 1.0576570 | -0.5915524 |

|    |   |     |            |            |            |
|----|---|-----|------------|------------|------------|
| 6  | H | H   | -0.9033214 | 4.1003023  | -1.1761130 |
| 7  | H | H7  | -2.9780636 | 2.6709029  | -1.4646857 |
| 8  | H | H8  | -1.7499928 | 0.9640771  | 0.7962412  |
| 9  | H | H12 | -0.1191565 | 0.8072066  | -1.5228758 |
| 10 | F | F1  | 1.3244981  | 3.2147033  | -0.4056469 |
| 11 | F | F2  | 0.0981061  | 2.5204954  | 1.2754407  |
| 12 | C | C1  | 1.3963136  | 0.1950264  | -0.1345531 |
| 13 | C | C6  | 3.4137602  | -1.6272165 | 0.7115376  |
| 14 | C | C7  | 1.6470497  | -1.0214553 | -0.8308863 |
| 15 | C | C8  | 2.2002934  | 0.4568797  | 1.0128273  |
| 16 | C | C9  | 3.1820342  | -0.4235911 | 1.4158791  |
| 17 | C | C10 | 2.6207714  | -1.9087996 | -0.4239561 |
| 18 | H | H2  | 1.0484108  | -1.2537662 | -1.7080921 |
| 19 | H | H6  | 2.0335083  | 1.3660344  | 1.5770487  |
| 20 | H | H5  | 3.7873072  | -0.1954740 | 2.2905431  |
| 21 | H | H3  | 2.7895711  | -2.8287797 | -0.9791327 |
| 22 | C | C11 | -3.2961996 | 0.1690414  | -0.5228418 |
| 23 | O | O1  | -4.0604403 | 0.2788837  | -1.4702046 |
| 24 | O | O2  | -3.3086894 | -0.9043195 | 0.3167099  |
| 25 | C | C12 | -4.2820913 | -1.9058321 | 0.0036247  |
| 26 | H | H1  | -5.2961855 | -1.5047171 | 0.0952275  |
| 27 | H | H9  | -4.1241115 | -2.7069217 | 0.7274931  |
| 28 | H | H10 | -4.1449068 | -2.2768805 | -1.0163953 |
| 29 | N | N1  | 4.4201155  | -2.4844004 | 1.0969438  |
| 30 | H | H4  | 4.7824353  | -2.3941872 | 2.0359887  |
| 31 | H | H11 | 4.3872762  | -3.4351844 | 0.7561341  |

### pOH\_SM (S1c)

G = -927.720966

iv = none

#### Cartesian Coordinates (Angstroms)

|       | Atom | X   | Y          | Z          |            |
|-------|------|-----|------------|------------|------------|
| ----- |      |     |            |            |            |
| 1     | C    | C1  | 1.7176635  | 0.7049715  | -1.2705558 |
| 2     | C    | C2  | 0.5244052  | 1.2429854  | -0.5888208 |
| 3     | C    | C3  | 0.8191476  | -0.3143685 | -0.6521193 |
| 4     | H    | H3  | -0.2658900 | 1.5445537  | -1.2763492 |
| 5     | H    | H6  | 1.1813468  | -0.7248364 | 0.2875717  |
| 6     | C    | C4  | 0.5664812  | 1.9608276  | 0.7219435  |
| 7     | C    | C5  | 0.5510370  | 3.3453453  | 3.1697163  |
| 8     | C    | C6  | -0.4413795 | 1.7357997  | 1.6732258  |
| 9     | C    | C7  | 1.5661187  | 2.8935809  | 1.0212313  |
| 10    | C    | C8  | 1.5625457  | 3.5815466  | 2.2345678  |
| 11    | C    | C9  | -0.4569616 | 2.4159899  | 2.8847103  |
| 12    | H    | H4  | -1.2238110 | 1.0124494  | 1.4576288  |
| 13    | H    | H7  | 2.3594454  | 3.0816508  | 0.3057250  |
| 14    | H    | H8  | 2.3489012  | 4.3021003  | 2.4524849  |
| 15    | H    | H9  | -1.2354174 | 2.2422225  | 3.6207104  |
| 16    | C    | C10 | -0.0256227 | -1.1835437 | -1.4787692 |
| 17    | H    | H11 | -0.3308351 | -0.8084850 | -2.4543328 |
| 18    | C    | C11 | -0.4506697 | -2.4033908 | -1.1162162 |
| 19    | H    | H12 | -0.1849613 | -2.8529013 | -0.1637986 |
| 20    | C    | C12 | -1.3099918 | -3.1921371 | -2.0232351 |

|    |   |     |            |            |            |
|----|---|-----|------------|------------|------------|
| 21 | O | O1  | -1.7058173 | -2.8384995 | -3.1178977 |
| 22 | O | O2  | -1.6165460 | -4.3919981 | -1.4708236 |
| 23 | C | C13 | -2.4504622 | -5.2374544 | -2.2758548 |
| 24 | H | H5  | -3.4026611 | -4.7454437 | -2.4925444 |
| 25 | H | H13 | -2.6102318 | -6.1404204 | -1.6854493 |
| 26 | H | H14 | -1.9556246 | -5.4785865 | -3.2207919 |
| 27 | F | F1  | 1.7827542  | 0.7845676  | -2.6206418 |
| 28 | F | F2  | 2.9518510  | 0.8833571  | -0.7438053 |
| 29 | O | O3  | 0.4915019  | 3.9861025  | 4.3747873  |
| 30 | H | H15 | 1.2436836  | 4.5940145  | 4.4477026  |

### pOH\_TS2 (S-TS1c)

G = -927.683551

iv = i104

S<sup>2</sup> = 0.5058

Cartesian Coordinates (Angstroms)

|       | Atom | X   | Y          | Z          |            |
|-------|------|-----|------------|------------|------------|
| ----- |      |     |            |            |            |
| 1     | C    | C   | -0.8343384 | 3.0005875  | -0.7407077 |
| 2     | C    | C2  | -1.9829047 | 2.2662349  | -0.8020632 |
| 3     | C    | C3  | -2.1042135 | 1.0372641  | -0.1082562 |
| 4     | C    | C4  | 0.3542186  | 2.3643336  | -0.1116000 |
| 5     | C    | C5  | 0.5256601  | 0.9448303  | -0.5683545 |
| 6     | H    | H   | -0.7301742 | 3.9984166  | -1.1522788 |
| 7     | H    | H7  | -2.8147603 | 2.5799453  | -1.4296835 |
| 8     | H    | H8  | -1.5836454 | 0.8652785  | 0.8238757  |
| 9     | H    | H12 | 0.0492697  | 0.7031459  | -1.5090688 |
| 10    | F    | F1  | 1.4973858  | 3.0949055  | -0.3957734 |
| 11    | F    | F2  | 0.2712326  | 2.4172782  | 1.2927841  |
| 12    | C    | C1  | 1.5376800  | 0.0644986  | -0.0982657 |
| 13    | C    | C6  | 3.5070141  | -1.7720166 | 0.7576334  |
| 14    | C    | C7  | 1.7747574  | -1.1543337 | -0.7946901 |
| 15    | C    | C8  | 2.3301349  | 0.3200217  | 1.0546892  |
| 16    | C    | C9  | 3.2991461  | -0.5778997 | 1.4669917  |
| 17    | C    | C10 | 2.7337107  | -2.0572561 | -0.3797899 |
| 18    | H    | H2  | 1.1816258  | -1.3754413 | -1.6783337 |
| 19    | H    | H6  | 2.1723372  | 1.2324451  | 1.6157909  |
| 20    | H    | H5  | 3.8997598  | -0.3626211 | 2.3492904  |
| 21    | H    | H3  | 2.9095243  | -2.9851554 | -0.9146080 |
| 22    | C    | C11 | -3.1320862 | 0.0717056  | -0.4974130 |
| 23    | O    | O1  | -3.8953467 | 0.1895222  | -1.4437008 |
| 24    | O    | O2  | -3.1415021 | -1.0023819 | 0.3367300  |
| 25    | C    | C12 | -4.1134268 | -2.0068523 | 0.0224721  |
| 26    | H    | H1  | -5.1277049 | -1.6073436 | 0.1168668  |
| 27    | H    | H9  | -3.9514965 | -2.8086909 | 0.7442256  |
| 28    | H    | H10 | -3.9754656 | -2.3741969 | -0.9985851 |
| 29    | O    | O3  | 4.4384058  | -2.6900073 | 1.1254616  |
| 30    | H    | H4  | 4.9052025  | -2.3762166 | 1.9163605  |



## pOMe\_SM (S1d)

G = -966.999935

iv = none

### Cartesian Coordinates (Angstroms)

|    | Atom  | X          | Y          | Z          |
|----|-------|------------|------------|------------|
| 1  | C C1  | 1.5684705  | 0.2206178  | -1.7265240 |
| 2  | C C2  | 0.3767325  | 0.7586473  | -1.0428449 |
| 3  | C C3  | 0.6711354  | -0.7986142 | -1.1054805 |
| 4  | H H3  | -0.4146782 | 1.0603301  | -1.7291412 |
| 5  | H H6  | 1.0361460  | -1.2083128 | -0.1665828 |
| 6  | C C4  | 0.4192798  | 1.4751382  | 0.2683520  |
| 7  | C C5  | 0.3995578  | 2.8646981  | 2.7183402  |
| 8  | C C6  | -0.5826736 | 1.2374397  | 1.2250323  |
| 9  | C C7  | 1.4069566  | 2.4176329  | 0.5652301  |
| 10 | C C8  | 1.4062191  | 3.1116747  | 1.7788282  |
| 11 | C C9  | -0.5978226 | 1.9188432  | 2.4327813  |
| 12 | H H4  | -1.3580613 | 0.5051265  | 1.0139794  |
| 13 | H H7  | 2.1951714  | 2.6143151  | -0.1540665 |
| 14 | H H8  | 2.1883617  | 3.8356514  | 1.9764159  |
| 15 | H H9  | -1.3698877 | 1.7390233  | 3.1742316  |
| 16 | C C10 | -0.1777455 | -1.6675893 | -1.9280107 |
| 17 | H H11 | -0.4818819 | -1.2951250 | -2.9049402 |
| 18 | C C11 | -0.6097880 | -2.8832318 | -1.5593780 |
| 19 | H H12 | -0.3457029 | -3.3298459 | -0.6051592 |
| 20 | C C12 | -1.4759922 | -3.6705031 | -2.4608967 |
| 21 | O O1  | -1.8727548 | -3.3192847 | -3.5560320 |
| 22 | O O2  | -1.7885307 | -4.8663163 | -1.9026053 |
| 23 | C C13 | -2.6297513 | -5.7098323 | -2.7019138 |
| 24 | H H5  | -3.5815062 | -5.2147909 | -2.9137000 |
| 25 | H H13 | -2.7893392 | -6.6115801 | -2.1095754 |
| 26 | H H14 | -2.1413615 | -5.9538428 | -3.6494661 |
| 27 | F F1  | 1.6301616  | 0.2985041  | -3.0770919 |
| 28 | F F2  | 2.8034684  | 0.4007019  | -1.2029834 |
| 29 | O O3  | 0.2963876  | 3.4834113  | 3.9292099  |
| 30 | C C14 | 1.2722343  | 4.4550219  | 4.2726559  |
| 31 | H H2  | 2.2778950  | 4.0167761  | 4.3222211  |
| 32 | H H1  | 0.9909234  | 4.8256908  | 5.2598928  |
| 33 | H H10 | 1.2783764  | 5.2896248  | 3.5592219  |

### pOMe\_TS2 (S-TS1d)

G = -966.962804

iv = i120

S<sup>2</sup> = 0.4627

Cartesian Coordinates (Angstroms)

| Atom     | X          | Y          | Z          |
|----------|------------|------------|------------|
| 1 C C    | -1.2853765 | -0.9843654 | -3.2298744 |
| 2 C C2   | -2.4478855 | -1.0570847 | -2.5210862 |
| 3 C C3   | -2.5969876 | -0.3738806 | -1.2876998 |
| 4 C C4   | -0.1215990 | -0.3415462 | -2.5660629 |
| 5 C C5   | 0.0152474  | -0.7873108 | -1.1388865 |
| 6 H H    | -1.1548866 | -1.3895044 | -4.2272081 |
| 7 H H7   | -3.2700595 | -1.6867161 | -2.8552197 |
| 8 H H8   | -2.0992402 | 0.5680364  | -1.1019723 |
| 9 H H12  | -0.4471057 | -1.7370223 | -0.9060560 |
| 10 F F1  | 1.0444644  | -0.6188252 | -3.2626443 |
| 11 F F2  | -0.2163996 | 1.0621237  | -2.6311444 |
| 12 C C1  | 1.0108366  | -0.3040677 | -0.2465697 |
| 13 C C6  | 2.9925752  | 0.5632996  | 1.5807666  |
| 14 C C7  | 1.2470701  | -0.9924939 | 0.9779465  |
| 15 C C8  | 1.7997017  | 0.8480714  | -0.5034394 |
| 16 C C9  | 2.7768615  | 1.2693620  | 0.3848445  |
| 17 C C10 | 2.2087428  | -0.5715467 | 1.8713489  |
| 18 H H2  | 0.6540083  | -1.8744149 | 1.2063193  |
| 19 H H6  | 1.6379786  | 1.4053597  | -1.4172121 |
| 20 H H5  | 3.3622031  | 2.1496247  | 0.1452903  |
| 21 H H3  | 2.3890886  | -1.0999616 | 2.8021740  |
| 22 C C11 | -3.6490779 | -0.7776127 | -0.3544587 |
| 23 O O1  | -4.4312068 | -1.7000828 | -0.5247839 |
| 24 O O2  | -3.6601480 | 0.0151239  | 0.7508289  |
| 25 C C12 | -4.6736312 | -0.2900381 | 1.7162525  |
| 26 H H1  | -5.6501013 | 0.0616953  | 1.3679974  |
| 27 H H9  | -4.3875978 | 0.2408311  | 2.6251722  |
| 28 H H10 | -4.7307654 | -1.3660361 | 1.8947585  |
| 29 O O3  | 3.9193253  | 0.8926177  | 2.5124782  |
| 30 C C13 | 4.7696399  | 2.0076929  | 2.2673506  |
| 31 H H4  | 5.4324808  | 2.0698038  | 3.1316097  |
| 32 H H11 | 4.1950788  | 2.9381197  | 2.1803286  |
| 33 H H13 | 5.3667660  | 1.8607484  | 1.3588516  |

### pNHCOMe\_SM (S1e)

G = -1060.47329

iv = none

Cartesian Coordinates (Angstroms)

| Atom   | X         | Y          | Z          |
|--------|-----------|------------|------------|
| 1 C C1 | 1.1713988 | 0.1575743  | -2.5063816 |
| 2 C C2 | 0.0746468 | 0.5360569  | -1.5940816 |
| 3 C C3 | 0.4551586 | -0.9803119 | -1.8554379 |

|    |   |     |            |            |            |
|----|---|-----|------------|------------|------------|
| 4  | H | H3  | -0.8364244 | 0.8316940  | -2.1138577 |
| 5  | H | H6  | 0.9977653  | -1.4393910 | -1.0322157 |
| 6  | C | C4  | 0.2848449  | 1.1340345  | -0.2398241 |
| 7  | C | C5  | 0.5967967  | 2.2851907  | 2.3182726  |
| 8  | C | C6  | -0.5347055 | 0.7412212  | 0.8278222  |
| 9  | C | C7  | 1.2582649  | 2.1111000  | -0.0000613 |
| 10 | C | C8  | 1.4233990  | 2.6872720  | 1.2588706  |
| 11 | C | C9  | -0.3842648 | 1.3064663  | 2.0872504  |
| 12 | H | H4  | -1.2963958 | -0.0181440 | 0.6698103  |
| 13 | H | H7  | 1.9085981  | 2.4281561  | -0.8084713 |
| 14 | H | H8  | 2.1795727  | 3.4397135  | 1.4311937  |
| 15 | H | H9  | -1.0315881 | 0.9864734  | 2.9017992  |
| 16 | C | C10 | -0.4605186 | -1.8381581 | -2.6155977 |
| 17 | H | H11 | -0.9621526 | -1.3995086 | -3.4768142 |
| 18 | C | C11 | -0.7271914 | -3.1200015 | -2.3225197 |
| 19 | H | H12 | -0.2622053 | -3.6350699 | -1.4868079 |
| 20 | C | C12 | -1.6764426 | -3.8919940 | -3.1511922 |
| 21 | O | O1  | -2.2963893 | -3.4692799 | -4.1086108 |
| 22 | O | O2  | -1.7767426 | -5.1674604 | -2.7017280 |
| 23 | C | C13 | -2.6724119 | -6.0064804 | -3.4449387 |
| 24 | H | H5  | -3.6915473 | -5.6111880 | -3.4077610 |
| 25 | H | H13 | -2.6236443 | -6.9849591 | -2.9658000 |
| 26 | H | H14 | -2.3589465 | -6.0737342 | -4.4903650 |
| 27 | F | F1  | 1.0067983  | 0.3562810  | -3.8353220 |
| 28 | F | F2  | 2.4596795  | 0.3884930  | -2.1653710 |
| 29 | N | N1  | 0.6944204  | 2.8088096  | 3.6232082  |
| 30 | H | H2  | 0.0386330  | 2.4191320  | 4.2864124  |
| 31 | C | C14 | 1.5413221  | 3.7860268  | 4.1073753  |
| 32 | C | C15 | 1.3137490  | 4.1357926  | 5.5722271  |
| 33 | H | H10 | 2.2809986  | 4.3566528  | 6.0286279  |
| 34 | H | H15 | 0.8180166  | 3.3435332  | 6.1430953  |
| 35 | H | H16 | 0.7007428  | 5.0424378  | 5.6345030  |
| 36 | O | O3  | 2.3867645  | 4.3535694  | 3.4326912  |

### pNHCOMe\_TS2 (S-TS1e)

G = -1060.43552

iv = i111

S<sup>2</sup> = 0.5197

Cartesian Coordinates (Angstroms)

|    | Atom | X   | Y          | Z         |            |
|----|------|-----|------------|-----------|------------|
| 1  | C    | C   | -1.6566376 | 3.6562397 | -1.3429537 |
| 2  | C    | C2  | -2.8091997 | 2.9353394 | -1.4526862 |
| 3  | C    | C3  | -2.9883888 | 1.7254383 | -0.7364660 |
| 4  | C    | C4  | -0.5135962 | 3.0231753 | -0.6280485 |
| 5  | C    | C5  | -0.3433739 | 1.5860810 | -1.0289568 |
| 6  | H    | H   | -1.5148126 | 4.6412060 | -1.7738071 |
| 7  | H    | H7  | -3.5988899 | 3.2442342 | -2.1348052 |
| 8  | H    | H8  | -2.5298791 | 1.5721052 | 0.2307956  |
| 9  | H    | H12 | -0.7556016 | 1.3301491 | -1.9960268 |
| 10 | F    | F1  | 0.6542942  | 3.7247365 | -0.8777820 |
| 11 | F    | F2  | -0.6747975 | 3.1267197 | 0.7632907  |
| 12 | C    | C1  | 0.6022874  | 0.6913855 | -0.4611539 |

|    |   |     |            |            |            |
|----|---|-----|------------|------------|------------|
| 13 | C | C6  | 2.4405540  | -1.1914785 | 0.6027409  |
| 14 | C | C7  | 0.8445679  | -0.5530769 | -1.1050284 |
| 15 | C | C8  | 1.3194300  | 0.9470487  | 0.7398929  |
| 16 | C | C9  | 2.2230487  | 0.0367430  | 1.2593855  |
| 17 | C | C10 | 1.7360915  | -1.4694016 | -0.5875130 |
| 18 | H | H2  | 0.3128024  | -0.7833655 | -2.0245305 |
| 19 | H | H6  | 1.1551133  | 1.8812405  | 1.2618904  |
| 20 | H | H5  | 2.7621316  | 0.2510878  | 2.1710956  |
| 21 | H | H3  | 1.8992264  | -2.4146737 | -1.1015990 |
| 22 | C | C11 | -4.0012680 | 0.7610459  | -1.1655510 |
| 23 | O | O1  | -4.6951792 | 0.8583805  | -2.1659369 |
| 24 | O | O2  | -4.0858484 | -0.2853448 | -0.3010219 |
| 25 | C | C12 | -5.0537372 | -1.2823288 | -0.6490319 |
| 26 | H | H1  | -6.0577532 | -0.8501166 | -0.6890899 |
| 27 | H | H9  | -4.9935350 | -2.0375100 | 0.1359261  |
| 28 | H | H10 | -4.8235019 | -1.7226931 | -1.6237780 |
| 29 | N | N1  | 3.3253262  | -2.1722419 | 1.0681610  |
| 30 | H | H11 | 3.3779714  | -3.0037897 | 0.4949480  |
| 31 | C | C13 | 4.1130617  | -2.1734547 | 2.2098966  |
| 32 | O | O3  | 4.1640704  | -1.2460722 | 3.0004609  |
| 33 | C | C14 | 4.8948472  | -3.4621882 | 2.4184878  |
| 34 | H | H4  | 5.0617664  | -4.0281969 | 1.4960790  |
| 35 | H | H13 | 4.3512309  | -4.1022614 | 3.1235117  |
| 36 | H | H14 | 5.8581785  | -3.2141621 | 2.8692043  |

### pMe\_SM (S1f)

G = -891.799548

iv = none

#### Cartesian Coordinates (Angstroms)

| Atom     | X          | Y          | Z          |
|----------|------------|------------|------------|
| 1 C C1   | 1.3804811  | 0.7111935  | -1.7861492 |
| 2 C C2   | 0.2866776  | 1.1001233  | -0.8747163 |
| 3 C C3   | 0.6545210  | -0.4190597 | -1.1326506 |
| 4 H H3   | -0.6218868 | 1.4031422  | -1.3943647 |
| 5 H H6   | 1.1922568  | -0.8807027 | -0.3076510 |
| 6 C C4   | 0.4999533  | 1.7001255  | 0.4795990  |
| 7 C C5   | 0.8180760  | 2.8514766  | 3.0485519  |
| 8 C C6   | -0.3228548 | 1.3150779  | 1.5462997  |
| 9 C C7   | 1.4852563  | 2.6683170  | 0.7125421  |
| 10 C C8  | 1.6392027  | 3.2305764  | 1.9790346  |
| 11 C C9  | -0.1651259 | 1.8825139  | 2.8089096  |
| 12 H H4  | -1.0877670 | 0.5590569  | 1.3853688  |
| 13 H H7  | 2.1401209  | 2.9749506  | -0.0963091 |
| 14 H H8  | 2.4142963  | 3.9768668  | 2.1390680  |
| 15 H H9  | -0.8130135 | 1.5654741  | 3.6230621  |
| 16 C C10 | -0.2649214 | -1.2725938 | -1.8936981 |
| 17 H H11 | -0.7636714 | -0.8315028 | -2.7553215 |
| 18 C C11 | -0.5361347 | -2.5538572 | -1.6025425 |
| 19 H H12 | -0.0747847 | -3.0711972 | -0.7662466 |
| 20 C C12 | -1.4852845 | -3.3226127 | -2.4346723 |
| 21 O O1  | -2.1001038 | -2.8977963 | -3.3944603 |
| 22 O O2  | -1.5911644 | -4.5978163 | -1.9858790 |

|    |   |     |            |            |            |
|----|---|-----|------------|------------|------------|
| 23 | C | C13 | -2.4873711 | -5.4339559 | -2.7316450 |
| 24 | H | H5  | -3.5055214 | -5.0358820 | -2.6967921 |
| 25 | H | H13 | -2.4426931 | -6.4127267 | -2.2526976 |
| 26 | H | H14 | -2.1715024 | -5.5017247 | -3.7763096 |
| 27 | F | F1  | 1.2180697  | 0.9082906  | -3.1158431 |
| 28 | F | F2  | 2.6714102  | 0.9320561  | -1.4462235 |
| 29 | C | C14 | 0.9777194  | 3.4838681  | 4.4113072  |
| 30 | H | H2  | 2.0336375  | 3.6363601  | 4.6612334  |
| 31 | H | H1  | 0.5308679  | 2.8644512  | 5.1956799  |
| 32 | H | H10 | 0.4912538  | 4.4675073  | 4.4535157  |

### pMe\_TS2 (S-TS1f)

G = -891.760479

iv = i127

S<sup>2</sup> = 0.5260

#### Cartesian Coordinates (Angstroms)

|    | Atom  | X          | Y          | Z          |
|----|-------|------------|------------|------------|
| 1  | C C   | -3.2411448 | -1.2102549 | -0.6227091 |
| 2  | C C2  | -2.4874199 | -2.3441240 | -0.6934144 |
| 3  | C C3  | -1.2165378 | -2.4161221 | -0.0674915 |
| 4  | C C4  | -2.5935456 | 0.0064873  | -0.0586121 |
| 5  | C C5  | -1.1983952 | 0.1824275  | -0.5854099 |
| 6  | H H   | -4.2614524 | -1.1355115 | -0.9823186 |
| 7  | H H7  | -2.8158369 | -3.2012848 | -1.2777478 |
| 8  | H H8  | -1.0091756 | -1.8761448 | 0.8464066  |
| 9  | H H12 | -1.0032239 | -0.2927791 | -1.5377288 |
| 10 | F F1  | -3.3510705 | 1.1303709  | -0.3428770 |
| 11 | F F2  | -2.5823967 | -0.0427127 | 1.3458421  |
| 12 | C C1  | -0.3037842 | 1.2109320  | -0.1706401 |
| 13 | C C6  | 1.5609839  | 3.2326926  | 0.5674210  |
| 14 | C C7  | 0.8735575  | 1.4472643  | -0.9302234 |
| 15 | C C8  | -0.5101283 | 2.0163608  | 0.9806499  |
| 16 | C C9  | 0.4012146  | 3.0022437  | 1.3260025  |
| 17 | C C10 | 1.7792142  | 2.4286188  | -0.5661451 |
| 18 | H H2  | 1.0593694  | 0.8395307  | -1.8125398 |
| 19 | H H6  | -1.3893384 | 1.8548016  | 1.5913664  |
| 20 | H H5  | 0.2168835  | 3.6080511  | 2.2102775  |
| 21 | H H3  | 2.6724990  | 2.5831353  | -1.1672359 |
| 22 | C C11 | -0.2498418 | -3.4333873 | -0.4866398 |
| 23 | O O1  | -0.4115242 | -4.2305043 | -1.3975294 |
| 24 | O O2  | 0.8750528  | -3.3888637 | 0.2741351  |
| 25 | C C12 | 1.8774345  | -4.3551328 | -0.0657145 |
| 26 | H H1  | 1.5029010  | -5.3711438 | 0.0908148  |
| 27 | H H9  | 2.7184454  | -4.1524296 | 0.5986839  |
| 28 | H H10 | 2.1789390  | -4.2503344 | -1.1117792 |
| 29 | C C13 | 2.5350013  | 4.3207831  | 0.9419171  |
| 30 | H H4  | 3.5725585  | 3.9931121  | 0.8114697  |
| 31 | H H11 | 2.4041978  | 4.6352923  | 1.9820438  |
| 32 | H H13 | 2.3965637  | 5.2086255  | 0.3097265  |

## pCl\_SM (S1i)

G = -1312.11478

iv = none

Cartesian Coordinates (Angstroms)

| Atom      | X          | Y          | Z          |
|-----------|------------|------------|------------|
| 1 C C1    | 1.0629383  | 1.4158113  | -1.5049339 |
| 2 C C2    | 0.1398042  | 1.5398942  | -0.3527260 |
| 3 C C3    | 0.6951483  | 0.1310238  | -0.8500301 |
| 4 H H3    | -0.8906327 | 1.7074024  | -0.6573324 |
| 5 H H6    | 1.4579103  | -0.2833529 | -0.1946151 |
| 6 C C4    | 0.4782137  | 2.0756827  | 0.9941942  |
| 7 C C5    | 0.9765783  | 3.0761558  | 3.5642872  |
| 8 C C6    | -0.5657112 | 2.5572507  | 1.7980247  |
| 9 C C7    | 1.7836200  | 2.1102276  | 1.5110443  |
| 10 C C8   | 2.0351636  | 2.6052449  | 2.7889840  |
| 11 C C9   | -0.3281184 | 3.0574004  | 3.0764095  |
| 12 H H4   | -1.5847155 | 2.5400634  | 1.4200373  |
| 13 H H7   | 2.6183172  | 1.7625201  | 0.9131847  |
| 14 H H8   | 3.0474087  | 2.6301134  | 3.1785618  |
| 15 H H9   | -1.1452559 | 3.4269295  | 3.6864817  |
| 16 C C10  | -0.2266630 | -0.8184726 | -1.4845070 |
| 17 H H11  | -0.9308160 | -0.4240651 | -2.2149550 |
| 18 C C11  | -0.2609302 | -2.1326999 | -1.2185126 |
| 19 H H12  | 0.4155811  | -2.5990981 | -0.5081290 |
| 20 C C12  | -1.2386765 | -3.0086821 | -1.8988252 |
| 21 O O1   | -2.0799745 | -2.6502155 | -2.7007146 |
| 22 O O2   | -1.0788318 | -4.2959737 | -1.5072398 |
| 23 C C13  | -1.9833911 | -5.2345541 | -2.1077452 |
| 24 H H5   | -3.0166572 | -5.0010274 | -1.8356089 |
| 25 H H13  | -1.6960144 | -6.2107232 | -1.7156897 |
| 26 H H14  | -1.8922845 | -5.2144020 | -3.1970391 |
| 27 F F1   | 0.5750157  | 1.6800851  | -2.7386468 |
| 28 F F2   | 2.3408549  | 1.8533815  | -1.4198456 |
| 29 Cl C11 | 1.2921180  | 3.7040797  | 5.1758867  |

## pCl\_TS2 (S-TS1i)

G = -1312.07449

iv = i128

S<sup>2</sup> = 0.5583

Cartesian Coordinates (Angstroms)

| Atom   | X          | Y         | Z          |
|--------|------------|-----------|------------|
| 1 C C  | -0.7144027 | 2.9378750 | -0.6746949 |
| 2 C C2 | -1.8511631 | 2.1867377 | -0.7221207 |
| 3 C C3 | -1.9368194 | 0.9513782 | -0.0304521 |
| 4 C C4 | 0.4928846  | 2.3128350 | -0.0633652 |
| 5 C C5 | 0.6661820  | 0.8922119 | -0.5199505 |
| 6 H H  | -0.6282091 | 3.9366106 | -1.0883615 |
| 7 H H7 | -2.6978162 | 2.4866973 | -1.3362765 |

|    |    |     |            |            |            |
|----|----|-----|------------|------------|------------|
| 8  | H  | H8  | -1.4114849 | 0.7924321  | 0.9016563  |
| 9  | H  | H12 | 0.2049960  | 0.6564334  | -1.4701264 |
| 10 | F  | F1  | 1.6232164  | 3.0494124  | -0.3706913 |
| 11 | F  | F2  | 0.4255219  | 2.3689785  | 1.3382104  |
| 12 | C  | C1  | 1.6791377  | 0.0074726  | -0.0450402 |
| 13 | C  | C6  | 3.6443348  | -1.8165463 | 0.7981102  |
| 14 | C  | C7  | 1.9135574  | -1.2045907 | -0.7476448 |
| 15 | C  | C8  | 2.4683437  | 0.2617319  | 1.1090983  |
| 16 | C  | C9  | 3.4425531  | -0.6352618 | 1.5198311  |
| 17 | C  | C10 | 2.8790198  | -2.1090211 | -0.3356613 |
| 18 | H  | H2  | 1.3216660  | -1.4240667 | -1.6324540 |
| 19 | H  | H6  | 2.3093340  | 1.1715125  | 1.6741328  |
| 20 | H  | H5  | 4.0459134  | -0.4291387 | 2.3977672  |
| 21 | H  | H3  | 3.0491448  | -3.0301417 | -0.8828047 |
| 22 | C  | C11 | -2.9471157 | -0.0383071 | -0.4165050 |
| 23 | O  | O1  | -3.7156678 | 0.0695285  | -1.3586056 |
| 24 | O  | O2  | -2.9270737 | -1.1113717 | 0.4138963  |
| 25 | C  | C12 | -3.8792252 | -2.1384886 | 0.1055527  |
| 26 | H  | H1  | -4.9007242 | -1.7588757 | 0.2013831  |
| 27 | H  | H9  | -3.6978636 | -2.9334902 | 0.8297628  |
| 28 | H  | H10 | -3.7348658 | -2.5053594 | -0.9146126 |
| 29 | Cl | Cl1 | 4.8766261  | -2.9471882 | 1.3199661  |

### pBr\_TS2 (S1j)

G = -3425.80123

iv = none

#### Cartesian Coordinates (Angstroms)

| Atom     | X          | Y          | Z          |
|----------|------------|------------|------------|
| 1 C C1   | 1.3562471  | 2.6029050  | 1.2666918  |
| 2 C C4   | -0.6298350 | 2.8110397  | 3.2079051  |
| 3 C C2   | 0.7185734  | 1.4376814  | 1.7172858  |
| 4 C C6   | 1.0156669  | 3.8582232  | 1.7679532  |
| 5 C C5   | 0.0187999  | 3.9511614  | 2.7362616  |
| 6 C C3   | -0.2767281 | 1.5624892  | 2.6997928  |
| 7 H H6   | 1.5175193  | 4.7487317  | 1.4057904  |
| 8 C C7   | 1.1124539  | 0.1354154  | 1.1133198  |
| 9 C C8   | 0.9466757  | -1.1990873 | 1.7365377  |
| 10 C C9  | 0.0186687  | -0.9076405 | 0.6097841  |
| 11 H H2  | 1.9701604  | 0.1879599  | 0.4468276  |
| 12 H H9  | -0.9951829 | -0.6472929 | 0.9066102  |
| 13 F F1  | 0.4393115  | -1.3158115 | 2.9860755  |
| 14 F F2  | 1.9255881  | -2.1146176 | 1.5561425  |
| 15 C C10 | 0.1900134  | -1.5358200 | -0.7050430 |
| 16 H H8  | 1.1912244  | -1.8658255 | -0.9766831 |
| 17 C C11 | -0.7967142 | -1.7231741 | -1.5941015 |
| 18 H H10 | -1.8237509 | -1.4308560 | -1.3952506 |
| 19 C C12 | -0.5098685 | -2.3537982 | -2.9004189 |
| 20 O O1  | 0.5832979  | -2.7182529 | -3.2898171 |
| 21 O O2  | -1.6438204 | -2.4791110 | -3.6311886 |
| 22 C C13 | -1.4742752 | -3.0839992 | -4.9217103 |
| 23 H H7  | -2.4696650 | -3.1096851 | -5.3663640 |
| 24 H H11 | -1.0703997 | -4.0951857 | -4.8222437 |

|    |    |     |            |            |            |
|----|----|-----|------------|------------|------------|
| 25 | H  | H12 | -0.7925507 | -2.4909454 | -5.5376410 |
| 26 | H  | H13 | -1.4009261 | 2.8927997  | 3.9661981  |
| 27 | H  | H3  | 2.1299839  | 2.5312127  | 0.5064749  |
| 28 | H  | H1  | -0.7762866 | 0.6814874  | 3.0855627  |
| 29 | Br | Br1 | -0.4741812 | 5.6699962  | 3.4252475  |

### pBr\_TS2 (S-TS1j)

G = -3425.76075

iv = i133

S<sup>2</sup> = 0.5546

#### Cartesian Coordinates (Angstroms)

|    | Atom   | X          | Y          | Z          |
|----|--------|------------|------------|------------|
| 1  | C C    | -0.8155237 | 2.9537288  | -0.5005872 |
| 2  | C C2   | -1.9361827 | 2.1779372  | -0.5224954 |
| 3  | C C3   | -1.9545462 | 0.9087785  | 0.1112560  |
| 4  | C C4   | 0.4367717  | 2.3287633  | 0.0126214  |
| 5  | C C5   | 0.6140255  | 0.9352300  | -0.5191788 |
| 6  | H H    | -0.7736767 | 3.9729385  | -0.8683150 |
| 7  | H H7   | -2.8226476 | 2.4857335  | -1.0731278 |
| 8  | H H8   | -1.3765984 | 0.7210921  | 1.0060768  |
| 9  | H H12  | 0.1141262  | 0.7341125  | -1.4577151 |
| 10 | F F1   | 1.5334149  | 3.1042878  | -0.3197891 |
| 11 | F F2   | 0.4451122  | 2.3186286  | 1.4168530  |
| 12 | C C1   | 1.6689735  | 0.0538574  | -0.1377762 |
| 13 | C C6   | 3.7061034  | -1.7621794 | 0.5299251  |
| 14 | C C7   | 1.8972427  | -1.1169033 | -0.9086001 |
| 15 | C C8   | 2.5045807  | 0.2725334  | 0.9903035  |
| 16 | C C9   | 3.5144744  | -0.6203524 | 1.3151728  |
| 17 | C C10  | 2.8992134  | -2.0179835 | -0.5834434 |
| 18 | H H2   | 1.2701520  | -1.3074775 | -1.7757957 |
| 19 | H H6   | 2.3514741  | 1.1504878  | 1.6046668  |
| 20 | H H5   | 4.1489201  | -0.4387045 | 2.1760502  |
| 21 | H H3   | 3.0594091  | -2.9063750 | -1.1843230 |
| 22 | C C11  | -2.9634732 | -0.0861036 | -0.2659838 |
| 23 | O O1   | -3.7881729 | 0.0484362  | -1.1556234 |
| 24 | O O2   | -2.8700630 | -1.1978847 | 0.5058995  |
| 25 | C C12  | -3.8159820 | -2.2322315 | 0.2024378  |
| 26 | H H1   | -4.8390917 | -1.8783145 | 0.3588484  |
| 27 | H H9   | -3.5853585 | -3.0496220 | 0.8865239  |
| 28 | H H10  | -3.7123637 | -2.5580693 | -0.8366212 |
| 29 | Br Br1 | 5.0896863  | -2.9943441 | 0.9927401  |



### pCF3\_SM (S1k)

G = -1189.54302

iv = none

Cartesian Coordinates (Angstroms)

| Atom     | X          | Y          | Z          |
|----------|------------|------------|------------|
| 1 C C1   | 1.3905282  | 0.7055646  | -1.7814656 |
| 2 C C2   | 0.2860935  | 1.0987292  | -0.8829945 |
| 3 C C3   | 0.6555983  | -0.4194453 | -1.1289813 |
| 4 H H3   | -0.6187309 | 1.4030623  | -1.4078014 |
| 5 H H6   | 1.1862778  | -0.8794566 | -0.2982996 |
| 6 C C4   | 0.4892453  | 1.7050214  | 0.4698021  |
| 7 C C5   | 0.7850619  | 2.8541838  | 3.0090151  |
| 8 C C6   | -0.3390294 | 1.3145880  | 1.5311086  |
| 9 C C7   | 1.4671871  | 2.6831757  | 0.6967647  |
| 10 C C8  | 1.6144269  | 3.2544324  | 1.9584724  |
| 11 C C9  | -0.1953346 | 1.8829654  | 2.7939078  |
| 12 H H4  | -1.1003497 | 0.5572787  | 1.3640782  |
| 13 H H7  | 2.1162669  | 2.9943651  | -0.1141762 |
| 14 H H8  | 2.3696859  | 4.0159093  | 2.1260048  |
| 15 H H9  | -0.8429598 | 1.5783240  | 3.6088363  |
| 16 C C10 | -0.2602967 | -1.2750697 | -1.8940802 |
| 17 H H11 | -0.7489088 | -0.8381627 | -2.7635918 |
| 18 C C11 | -0.5380935 | -2.5527254 | -1.5965082 |
| 19 H H12 | -0.0868739 | -3.0667832 | -0.7526672 |
| 20 C C12 | -1.4830539 | -3.3227510 | -2.4344922 |
| 21 O O1  | -2.0871486 | -2.8970320 | -3.4003378 |
| 22 O O2  | -1.5959496 | -4.5945813 | -1.9822844 |
| 23 C C13 | -2.4876238 | -5.4324597 | -2.7329928 |
| 24 H H5  | -3.5059636 | -5.0348042 | -2.7029678 |
| 25 H H13 | -2.4440293 | -6.4107954 | -2.2533911 |
| 26 H H14 | -2.1657269 | -5.4996729 | -3.7757532 |
| 27 F F1  | 1.2442136  | 0.8987727  | -3.1118325 |
| 28 F F2  | 2.6753105  | 0.9304317  | -1.4225751 |
| 29 C C14 | 0.9962693  | 3.4407113  | 4.3786791  |
| 30 F F3  | 2.0580250  | 2.8770349  | 5.0005748  |
| 31 F F4  | 1.2410832  | 4.7691376  | 4.3188786  |
| 32 F F5  | -0.0752004 | 3.2600513  | 5.1810706  |

### pCF3\_TS2 (S-TS1k)

G = -1189.50258

iv = i125

S<sup>2</sup> = 0.6218

Cartesian Coordinates (Angstroms)

| Atom   | X          | Y          | Z          |
|--------|------------|------------|------------|
| 1 C C  | -3.2797245 | -1.2121588 | -0.6934350 |
| 2 C C2 | -2.5116752 | -2.3389138 | -0.7257791 |
| 3 C C3 | -1.2485162 | -2.3795873 | -0.0840931 |
| 4 C C4 | -2.6572962 | 0.0335206  | -0.1545598 |

|    |   |     |            |            |            |
|----|---|-----|------------|------------|------------|
| 5  | C | C5  | -1.2544317 | 0.2152299  | -0.6599795 |
| 6  | H | H   | -4.2960100 | -1.1609020 | -1.0682988 |
| 7  | H | H7  | -2.8238888 | -3.2146668 | -1.2915952 |
| 8  | H | H8  | -1.0537595 | -1.8003942 | 0.8086027  |
| 9  | H | H12 | -1.0478156 | -0.2542267 | -1.6132811 |
| 10 | F | F1  | -3.4240074 | 1.1344557  | -0.4887828 |
| 11 | F | F2  | -2.6735928 | 0.0180651  | 1.2469293  |
| 12 | C | C1  | -0.3414879 | 1.2165497  | -0.2128568 |
| 13 | C | C6  | 1.5803490  | 3.1115657  | 0.6072974  |
| 14 | C | C7  | 0.8566129  | 1.4185644  | -0.9486864 |
| 15 | C | C8  | -0.5428462 | 2.0040522  | 0.9524360  |
| 16 | C | C9  | 0.4027038  | 2.9375492  | 1.3464393  |
| 17 | C | C10 | 1.8018631  | 2.3468040  | -0.5454231 |
| 18 | H | H2  | 1.0317660  | 0.8247198  | -1.8418622 |
| 19 | H | H6  | -1.4418121 | 1.8672061  | 1.5393060  |
| 20 | H | H5  | 0.2384953  | 3.5271246  | 2.2426382  |
| 21 | H | H3  | 2.7160970  | 2.4785463  | -1.1145699 |
| 22 | C | C11 | -0.2546706 | -3.3889999 | -0.4658764 |
| 23 | O | O1  | -0.3981751 | -4.2218233 | -1.3459778 |
| 24 | O | O2  | 0.8666229  | -3.2780076 | 0.2884928  |
| 25 | C | C12 | 1.9083338  | -4.2149400 | -0.0204087 |
| 26 | H | H1  | 1.5696190  | -5.2398952 | 0.1571965  |
| 27 | H | H9  | 2.7348424  | -3.9637807 | 0.6454817  |
| 28 | H | H10 | 2.2139805  | -4.1210829 | -1.0664875 |
| 29 | C | C13 | 2.5837831  | 4.1520212  | 1.0246198  |
| 30 | F | F3  | 3.8341185  | 3.8301821  | 0.6250771  |
| 31 | F | F4  | 2.6119925  | 4.3099328  | 2.3660114  |
| 32 | F | F5  | 2.2985296  | 5.3632898  | 0.4914248  |

### pCN\_SM (S11)

G = -944.753991

iv = none

#### Cartesian Coordinates (Angstroms)

|       | Atom | X   | Y          | Z          |            |
|-------|------|-----|------------|------------|------------|
| ----- |      |     |            |            |            |
| 1     | C    | C1  | 1.0319461  | 1.2778849  | -1.6937737 |
| 2     | C    | C2  | 0.0960445  | 1.4105239  | -0.5500448 |
| 3     | C    | C3  | 0.6562833  | -0.0010430 | -1.0350636 |
| 4     | H    | H3  | -0.9313648 | 1.5780907  | -0.8640662 |
| 5     | H    | H6  | 1.4120200  | -0.4125834 | -0.3698562 |
| 6     | C    | C4  | 0.4258318  | 1.9500567  | 0.7956994  |
| 7     | C    | C5  | 0.9120884  | 2.9620527  | 3.3793517  |
| 8     | C    | C6  | -0.6242761 | 2.4441046  | 1.5866669  |
| 9     | C    | C7  | 1.7293305  | 1.9753284  | 1.3219641  |
| 10    | C    | C8  | 1.9710244  | 2.4727423  | 2.5969470  |
| 11    | C    | C9  | -0.3928655 | 2.9454223  | 2.8618626  |
| 12    | H    | H4  | -1.6382702 | 2.4325100  | 1.1963269  |
| 13    | H    | H7  | 2.5640968  | 1.6184703  | 0.7302804  |
| 14    | H    | H8  | 2.9815089  | 2.4894410  | 2.9924417  |
| 15    | H    | H9  | -1.2149625 | 3.3233372  | 3.4609522  |
| 16    | C    | C10 | -0.2624683 | -0.9535721 | -1.6712338 |
| 17    | H    | H11 | -0.9582229 | -0.5639595 | -2.4121110 |
| 18    | C    | C11 | -0.3001821 | -2.2650782 | -1.3947489 |

|    |   |     |            |            |            |
|----|---|-----|------------|------------|------------|
| 19 | H | H12 | 0.3681632  | -2.7265686 | -0.6734562 |
| 20 | C | C12 | -1.2719021 | -3.1459489 | -2.0797017 |
| 21 | O | O1  | -2.1015530 | -2.7909135 | -2.8947798 |
| 22 | O | O2  | -1.1196444 | -4.4287818 | -1.6745291 |
| 23 | C | C13 | -2.0183944 | -5.3721133 | -2.2777354 |
| 24 | H | H5  | -3.0547174 | -5.1307052 | -2.0252943 |
| 25 | H | H13 | -1.7410356 | -6.3439496 | -1.8683700 |
| 26 | H | H14 | -1.9089291 | -5.3660210 | -3.3654563 |
| 27 | F | F1  | 0.5541761  | 1.5386864  | -2.9307855 |
| 28 | F | F2  | 2.3079413  | 1.7167013  | -1.5969534 |
| 29 | C | C14 | 1.1623931  | 3.4751953  | 4.6940105  |
| 30 | N | N1  | 1.3659400  | 3.8906899  | 5.7614562  |

### pCN\_TS2 (S-TS1)

G = -944.713152

iv = i137

S<sup>2</sup> = 0.6312

#### Cartesian Coordinates (Angstroms)

| Atom     | X          | Y          | Z          |
|----------|------------|------------|------------|
| 1 C C    | -3.1090839 | -0.9324188 | -0.6288647 |
| 2 C C2   | -2.3299329 | -2.0510375 | -0.6568641 |
| 3 C C3   | -1.0677673 | -2.0729066 | -0.0120571 |
| 4 C C4   | -2.4941114 | 0.3212685  | -0.0957804 |
| 5 C C5   | -1.0923355 | 0.5099731  | -0.6068847 |
| 6 H H    | -4.1244855 | -0.8900055 | -1.0067117 |
| 7 H H7   | -2.6301789 | -2.9322518 | -1.2195622 |
| 8 H H8   | -0.8846812 | -1.4899310 | 0.8805992  |
| 9 H H12  | -0.8991695 | 0.0591984  | -1.5725171 |
| 10 F F1  | -3.2673527 | 1.4146714  | -0.4344781 |
| 11 F F2  | -2.5075325 | 0.3085765  | 1.3047115  |
| 12 C C1  | -0.1713863 | 1.4984922  | -0.1545684 |
| 13 C C6  | 1.7710068  | 3.3804744  | 0.6695429  |
| 14 C C7  | 1.0077671  | 1.7263356  | -0.9176674 |
| 15 C C8  | -0.3437069 | 2.2530012  | 1.0391001  |
| 16 C C9  | 0.6063549  | 3.1763799  | 1.4373984  |
| 17 C C10 | 1.9601638  | 2.6448086  | -0.5183662 |
| 18 H H2  | 1.1573829  | 1.1623713  | -1.8345869 |
| 19 H H6  | -1.2283877 | 2.0984419  | 1.6431480  |
| 20 H H5  | 0.4639545  | 3.7456288  | 2.3504729  |
| 21 H H3  | 2.8537470  | 2.8065734  | -1.1128248 |
| 22 C C11 | -0.0618197 | -3.0751446 | -0.3826549 |
| 23 O O1  | -0.1945299 | -3.9142076 | -1.2579497 |
| 24 O O2  | 1.0527218  | -2.9477331 | 0.3771840  |
| 25 C C12 | 2.1026021  | -3.8824063 | 0.0888101  |
| 26 H H1  | 1.7739496  | -4.9044379 | 0.2965142  |
| 27 H H9  | 2.9289161  | -3.6062448 | 0.7440922  |
| 28 H H10 | 2.4016408  | -3.8142906 | -0.9604735 |
| 29 C C13 | 2.7594867  | 4.3219007  | 1.0961977  |
| 30 N N1  | 3.5667676  | 5.0849199  | 1.4450410  |

### pNO2\_SM (S1m)

G = -1057.00885

iv = none

Cartesian Coordinates (Angstroms)

| Atom     | X          | Y          | Z          |
|----------|------------|------------|------------|
| 1 C C1   | 0.9606723  | 1.1812896  | -1.8531310 |
| 2 C C2   | 0.0349246  | 1.3009843  | -0.6988658 |
| 3 C C3   | 0.6076703  | -0.1026353 | -1.1926552 |
| 4 H H3   | -0.9977203 | 1.4565647  | -1.0014392 |
| 5 H H6   | 1.3756553  | -0.5061260 | -0.5366140 |
| 6 C C4   | 0.3728128  | 1.8414923  | 0.6438564  |
| 7 C C5   | 0.8678980  | 2.8424244  | 3.1975676  |
| 8 C C6   | -0.6762743 | 2.3263099  | 1.4439078  |
| 9 C C7   | 1.6821014  | 1.8755084  | 1.1574627  |
| 10 C C8  | 1.9328487  | 2.3726145  | 2.4314691  |
| 11 C C9  | -0.4396627 | 2.8281044  | 2.7184806  |
| 12 H H4  | -1.6930405 | 2.3069563  | 1.0617016  |
| 13 H H7  | 2.5138430  | 1.5262153  | 0.5574401  |
| 14 H H8  | 2.9367882  | 2.4057915  | 2.8364874  |
| 15 H H9  | -1.2428769 | 3.2030971  | 3.3406388  |
| 16 C C10 | -0.3076445 | -1.0649760 | -1.8194009 |
| 17 H H11 | -1.0183375 | -0.6823453 | -2.5496635 |
| 18 C C11 | -0.3245048 | -2.3775919 | -1.5468055 |
| 19 H H12 | 0.3591994  | -2.8329974 | -0.8361436 |
| 20 C C12 | -1.2937805 | -3.2687425 | -2.2226481 |
| 21 O O1  | -2.1399540 | -2.9205701 | -3.0234733 |
| 22 O O2  | -1.1171806 | -4.5510993 | -1.8270998 |
| 23 C C13 | -2.0109161 | -5.5043847 | -2.4224850 |
| 24 H H5  | -3.0469881 | -5.2780942 | -2.1555785 |
| 25 H H13 | -1.7149043 | -6.4738903 | -2.0208165 |
| 26 H H14 | -1.9155940 | -5.4923632 | -3.5114841 |
| 27 F F1  | 0.4660604  | 1.4392177  | -3.0836845 |
| 28 F F2  | 2.2315837  | 1.6358706  | -1.7681280 |
| 29 N N1  | 1.1310496  | 3.3684380  | 4.5444891  |
| 30 O O3  | 2.2963591  | 3.3664470  | 4.9414150  |
| 31 O O4  | 0.1699121  | 3.7784903  | 5.1952003  |

### pNO2\_TS2 (S-TS1m)

G = -1056.96757

iv = i146

S<sup>2</sup> = 0.6042

Cartesian Coordinates (Angstroms)

| Atom   | X          | Y         | Z          |
|--------|------------|-----------|------------|
| 1 C C  | -1.0505402 | 3.1613109 | -0.7618680 |
| 2 C C2 | -2.1778288 | 2.3962176 | -0.7922475 |
| 3 C C3 | -2.2302077 | 1.1537247 | -0.1084434 |
| 4 C C4 | 0.1781153  | 2.5460614 | -0.1766937 |
| 5 C C5 | 0.3521525  | 1.1241184 | -0.6346538 |

|    |   |     |            |            |            |
|----|---|-----|------------|------------|------------|
| 6  | H | H   | -0.9837357 | 4.1629145  | -1.1721862 |
| 7  | H | H7  | -3.0406011 | 2.6876625  | -1.3875016 |
| 8  | H | H8  | -1.6896861 | 0.9984542  | 0.8158345  |
| 9  | H | H12 | -0.1009347 | 0.8923349  | -1.5900162 |
| 10 | F | F1  | 1.2940308  | 3.2870577  | -0.5132652 |
| 11 | F | F2  | 0.1336866  | 2.6051720  | 1.2220645  |
| 12 | C | C1  | 1.3486363  | 0.2263447  | -0.1484016 |
| 13 | C | C6  | 3.2565094  | -1.6254149 | 0.7179857  |
| 14 | C | C7  | 1.5537745  | -0.9991868 | -0.8410035 |
| 15 | C | C8  | 2.1409860  | 0.4810842  | 1.0053119  |
| 16 | C | C9  | 3.0916634  | -0.4325935 | 1.4277239  |
| 17 | C | C10 | 2.4929002  | -1.9212115 | -0.4151085 |
| 18 | H | H2  | 0.9577564  | -1.2107602 | -1.7245399 |
| 19 | H | H6  | 2.0011554  | 1.4019270  | 1.5562857  |
| 20 | H | H5  | 3.7062824  | -0.2451737 | 2.2997809  |
| 21 | H | H3  | 2.6528627  | -2.8563351 | -0.9375804 |
| 22 | C | C11 | -3.2254250 | 0.1435432  | -0.4913149 |
| 23 | O | O1  | -4.0094962 | 0.2502472  | -1.4195601 |
| 24 | O | O2  | -3.1620420 | -0.9377572 | 0.3211888  |
| 25 | C | C12 | -4.0918647 | -1.9882898 | 0.0159936  |
| 26 | H | H1  | -5.1206382 | -1.6338762 | 0.1248956  |
| 27 | H | H9  | -3.8819071 | -2.7821657 | 0.7331040  |
| 28 | H | H10 | -3.9474514 | -2.3441567 | -1.0078561 |
| 29 | N | N1  | 4.2574823  | -2.5951503 | 1.1752864  |
| 30 | O | O3  | 4.9390762  | -2.2930285 | 2.1558377  |
| 31 | O | O4  | 4.3552888  | -3.6530746 | 0.5509473  |

### Phenolate Computational Attempts

#### Phenolate Intermediate - before opt (S7)

Cartesian Coordinates (Angstroms)

| Atom     | X          | Y          | Z          |
|----------|------------|------------|------------|
| 1 H H1   | -1.2586477 | 1.7626345  | -0.6723651 |
| 2 C C1   | -0.9593205 | 2.4202187  | 0.1371390  |
| 3 C C4   | -0.2979218 | 4.1741696  | 2.1509685  |
| 4 C C2   | 0.2137577  | 2.1675758  | 0.8567993  |
| 5 C C6   | -1.7765691 | 3.5228465  | 0.4322519  |
| 6 C C5   | -1.4837140 | 4.4444830  | 1.4487606  |
| 7 C C3   | 0.5323914  | 3.0761858  | 1.8689170  |
| 8 H H6   | -2.6812601 | 3.6767329  | -0.1548029 |
| 9 H H3   | 1.4327505  | 2.9470927  | 2.4620282  |
| 10 H H4  | -0.0103865 | 4.8530754  | 2.9532110  |
| 11 C C7  | 1.0948251  | 0.9939612  | 0.5158621  |
| 12 C C8  | 1.6506051  | 0.0771063  | 1.5469454  |
| 13 C C9  | 0.5283833  | -0.4138679 | 0.7043742  |
| 14 H H9  | -0.4263771 | -0.5138067 | 1.2125096  |
| 15 F F1  | 1.4564273  | 0.2726912  | 2.8952971  |
| 16 F F2  | 2.9162592  | -0.4510259 | 1.3985080  |
| 17 C C10 | 0.7675142  | -1.4081322 | -0.3507062 |
| 18 H H8  | 1.7384715  | -1.3585969 | -0.8450345 |
| 19 C C11 | -0.1058439 | -2.3552803 | -0.7279450 |
| 20 H H10 | -1.0813320 | -2.4452598 | -0.2647076 |
| 21 C C12 | 0.2326341  | -3.3145459 | -1.7973213 |

|    |   |     |            |            |            |
|----|---|-----|------------|------------|------------|
| 22 | O | O1  | 1.2898992  | -3.3544446 | -2.4044986 |
| 23 | O | O2  | -0.8331080 | -4.1340864 | -1.9776217 |
| 24 | C | C13 | -0.6385568 | -5.1147946 | -2.9957679 |
| 25 | H | H7  | 0.1956046  | -5.7751339 | -2.7383907 |
| 26 | H | H11 | -0.4683390 | -4.6343656 | -3.9644557 |
| 27 | H | H12 | -1.5482733 | -5.7177461 | -3.0641878 |
| 28 | H | H2  | 1.7504441  | 1.1589466  | -0.3355664 |
| 29 | O | O3  | -2.2303178 | 5.4433666  | 1.7097995  |

### Phenolate Intermediate - after geometry optimisation (Total Charge = -1) (S8)

Spartan'10: G = -927.192975, iv = none

Cartesian Coordinates (Angstroms)

|       | Atom | X   | Y          | Z          |            |
|-------|------|-----|------------|------------|------------|
| ----- |      |     |            |            |            |
| 1     | H    | H1  | 1.2808579  | 3.0897020  | 0.6306506  |
| 2     | C    | C1  | 0.7034081  | 2.9159564  | 1.5382962  |
| 3     | C    | C4  | -0.7906655 | 2.3886376  | 3.8520824  |
| 4     | C    | C2  | 0.4615034  | 1.5430458  | 1.9214290  |
| 5     | C    | C6  | 0.2458640  | 3.9704274  | 2.2653526  |
| 6     | C    | C5  | -0.5409795 | 3.7856705  | 3.4865468  |
| 7     | C    | C3  | -0.3177473 | 1.3411958  | 3.1233992  |
| 8     | H    | H6  | 0.4449109  | 4.9963243  | 1.9647671  |
| 9     | H    | H3  | -0.5169180 | 0.3229192  | 3.4373228  |
| 10    | H    | H4  | -1.3749331 | 2.2249088  | 4.7547202  |
| 11    | C    | C7  | 0.9940677  | 0.5293339  | 1.1434880  |
| 12    | C    | C8  | 0.7754011  | -0.9401199 | 1.1873830  |
| 13    | C    | C9  | -0.3501997 | -1.1906383 | 0.2744310  |
| 14    | H    | H2  | 1.5802893  | 0.8142811  | 0.2724571  |
| 15    | H    | H9  | -1.3228352 | -0.8910906 | 0.6559472  |
| 16    | F    | F1  | 0.5348639  | -1.4046105 | 2.4809257  |
| 17    | F    | F2  | 1.9329416  | -1.5751813 | 0.7622446  |
| 18    | C    | C10 | -0.1909201 | -1.6214304 | -1.0372029 |
| 19    | H    | H8  | 0.8233621  | -1.8602679 | -1.3499328 |
| 20    | C    | C11 | -1.1941300 | -1.8064516 | -1.9796295 |
| 21    | H    | H10 | -2.2305457 | -1.5924159 | -1.7330885 |
| 22    | C    | C12 | -0.9905567 | -2.2883093 | -3.3131497 |
| 23    | O    | O1  | -1.8563495 | -2.4639529 | -4.1707136 |
| 24    | O    | O2  | 0.3441622  | -2.5618713 | -3.6054491 |
| 25    | C    | C13 | 0.5736672  | -3.0254089 | -4.9252715 |
| 26    | H    | H7  | 1.6529881  | -3.1873279 | -5.0035254 |
| 27    | H    | H11 | 0.2512599  | -2.2918886 | -5.6739473 |
| 28    | H    | H12 | 0.0402419  | -3.9627018 | -5.1235976 |
| 29    | O    | O3  | -0.9630088 | 4.7412646  | 4.1640642  |

## Phenolate VCPR Transition State - before optimisation (S-TS4)

Cartesian Coordinates (Angstroms)

| Atom     | X          | Y          | Z          |
|----------|------------|------------|------------|
| 1 C C    | -0.6651935 | 2.9186490  | -0.6746263 |
| 2 C C2   | -1.8137598 | 2.1842964  | -0.7359817 |
| 3 C C3   | -1.9350686 | 0.9553256  | -0.0421748 |
| 4 C C4   | 0.5233634  | 2.2823951  | -0.0455186 |
| 5 C C5   | 0.6948050  | 0.8628918  | -0.5022731 |
| 6 H H    | -0.5610292 | 3.9164781  | -1.0861974 |
| 7 H H7   | -2.6456154 | 2.4980068  | -1.3636021 |
| 8 H H8   | -1.4145005 | 0.7833400  | 0.8899571  |
| 9 H H12  | 0.2184147  | 0.6212074  | -1.4429874 |
| 10 F F1  | 1.6665307  | 3.0129670  | -0.3296920 |
| 11 F F2  | 0.4403775  | 2.3353397  | 1.3588655  |
| 12 C C1  | 1.7068249  | -0.0174399 | -0.0321843 |
| 13 C C6  | 3.6761591  | -1.8539552 | 0.8237148  |
| 14 C C7  | 1.9439024  | -1.2362722 | -0.7286087 |
| 15 C C8  | 2.4992798  | 0.2380831  | 1.1207706  |
| 16 C C9  | 3.4682911  | -0.6598382 | 1.5330731  |
| 17 C C10 | 2.9028556  | -2.1391946 | -0.3137085 |
| 18 H H2  | 1.3507707  | -1.4573798 | -1.6122523 |
| 19 H H6  | 2.3414821  | 1.1505066  | 1.6818723  |
| 20 H H5  | 4.0689047  | -0.4445596 | 2.4153719  |
| 21 H H3  | 3.0786691  | -3.0670939 | -0.8485266 |
| 22 C C11 | -2.9629413 | -0.0102329 | -0.4313316 |
| 23 O O1  | -3.7262018 | 0.1075837  | -1.3776194 |
| 24 O O2  | -2.9723572 | -1.0843205 | 0.4028114  |
| 25 C C12 | -3.9442819 | -2.0887908 | 0.0885536  |
| 26 H H1  | -4.9585600 | -1.6892821 | 0.1829482  |
| 27 H H9  | -3.7823516 | -2.8906294 | 0.8103071  |
| 28 H H10 | -3.8063206 | -2.4561354 | -0.9325037 |
| 29 O O3  | 4.6075507  | -2.7719458 | 1.1915431  |

## Phenolate VCPR Transition State - after optimisation (Total Charge = -1) (S-TS4)

Spartan'10: G = -927.176731, iv = i107, S<sup>2</sup> = 0.0001

Cartesian Coordinates (Angstroms)

| Atom    | X          | Y         | Z          |
|---------|------------|-----------|------------|
| 1 C C   | -0.7028045 | 3.1038515 | -0.7049473 |
| 2 C C2  | -1.8062730 | 2.3228423 | -0.6517956 |
| 3 C C3  | -1.7138557 | 1.0591249 | 0.0372463  |
| 4 C C4  | 0.5346220  | 2.4555659 | -0.2063623 |
| 5 C C5  | 0.5468191  | 0.9779598 | -0.5446132 |
| 6 H H   | -0.6564795 | 4.1166443 | -1.0921863 |
| 7 H H7  | -2.7285382 | 2.5909061 | -1.1690556 |
| 8 H H8  | -1.3345859 | 1.0349481 | 1.0507740  |
| 9 H H12 | 0.1757076  | 0.8044173 | -1.5488622 |
| 10 F F1 | 1.6590641  | 3.0695692 | -0.7550712 |
| 11 F F2 | 0.7014846  | 2.6522265 | 1.1777744  |

|    |   |     |            |            |            |
|----|---|-----|------------|------------|------------|
| 12 | C | C1  | 1.4400750  | 0.0208918  | -0.0467964 |
| 13 | C | C6  | 3.2567048  | -2.0801602 | 0.8438868  |
| 14 | C | C7  | 1.6307000  | -1.1953743 | -0.7939404 |
| 15 | C | C8  | 2.1821669  | 0.1323339  | 1.1826385  |
| 16 | C | C9  | 3.0387980  | -0.8459548 | 1.5968119  |
| 17 | C | C10 | 2.4790717  | -2.1830413 | -0.3899775 |
| 18 | H | H2  | 1.0690408  | -1.3098361 | -1.7214063 |
| 19 | H | H6  | 2.0580032  | 1.0296004  | 1.7780306  |
| 20 | H | H5  | 3.5991611  | -0.7413867 | 2.5237495  |
| 21 | H | H3  | 2.6118024  | -3.0895804 | -0.9767112 |
| 22 | C | C11 | -2.5691403 | -0.0267344 | -0.3637043 |
| 23 | O | O1  | -3.2566035 | -0.0943725 | -1.3823008 |
| 24 | O | O2  | -2.5362285 | -1.0691777 | 0.5430958  |
| 25 | C | C12 | -3.2875790 | -2.2130706 | 0.1628205  |
| 26 | H | H1  | -4.3600864 | -1.9901305 | 0.1056993  |
| 27 | H | H9  | -3.1030485 | -2.9638402 | 0.9357245  |
| 28 | H | H10 | -2.9691897 | -2.5938533 | -0.8138878 |
| 29 | O | O3  | 4.0411914  | -2.9743692 | 1.2233663  |

### Cartesian Coordinates for Alkenoates

2-pyridyl

Cartesian Coordinates (Angstroms)

| Atom     | X          | Y          | Z          |
|----------|------------|------------|------------|
| 1 H H1   | -0.8129841 | 0.1160651  | 2.5439774  |
| 2 C C1   | -0.4744235 | 1.0344220  | 2.0725097  |
| 3 C C4   | 0.3943767  | 3.2735988  | 0.7940912  |
| 4 C C2   | -0.0405019 | 1.0174219  | 0.7369124  |
| 5 C C6   | -0.4631111 | 2.2371419  | 2.7754328  |
| 6 C C5   | -0.0197364 | 3.3864943  | 2.1263621  |
| 7 N N1   | 0.3892637  | 2.1317818  | 0.1089558  |
| 8 H H4   | 0.7478073  | 4.1512814  | 0.2545482  |
| 9 C C7   | -0.0462173 | -0.2423610 | -0.0175247 |
| 10 H H7  | -0.3962029 | -1.1224421 | 0.5161015  |
| 11 C C8  | 0.3475029  | -0.3625529 | -1.2967223 |
| 12 H H8  | 0.7005955  | 0.5006879  | -1.8504334 |
| 13 C C9  | 0.3445492  | -1.6289205 | -2.0555207 |
| 14 O O1  | -0.1019638 | -2.6869584 | -1.3305635 |
| 15 O O2  | 0.7050368  | -1.7230232 | -3.2132418 |
| 16 C C10 | -0.1160287 | -3.9392129 | -2.0292282 |
| 17 H H2  | 0.8925777  | -4.2122539 | -2.3520599 |
| 18 H H9  | -0.7640376 | -3.8835557 | -2.9083329 |
| 19 H H10 | -0.5000801 | -4.6695127 | -1.3157786 |
| 20 H H5  | -0.7941878 | 2.2743412  | 3.8097505  |
| 21 H H14 | 0.0077656  | 4.3475572  | 2.6307644  |



## 2-thiazoyl

## Cartesian Coordinates (Angstroms)

| Atom    | X          | Y          | Z          |
|---------|------------|------------|------------|
| 1 C C1  | -0.5454436 | 0.0226715  | 0.5437647  |
| 2 H H2  | -1.5032974 | 0.5360423  | 0.5852073  |
| 3 C C2  | 0.2303064  | 0.1838704  | -0.5432247 |
| 4 H H1  | 1.1980552  | -0.2977856 | -0.6521511 |
| 5 C C3  | -0.2472724 | -0.7859274 | 1.7085530  |
| 6 N N1  | -1.0663557 | -0.8859838 | 2.7293949  |
| 7 C C5  | -0.5603522 | -1.7087601 | 3.6968361  |
| 8 C C6  | 0.6653319  | -2.2605474 | 3.4372234  |
| 9 S S1  | 1.2388862  | -1.7305197 | 1.8953617  |
| 10 H H8 | -1.1365473 | -1.8812683 | 4.5989361  |
| 11 H H9 | 1.2465596  | -2.9321230 | 4.0541349  |
| 12 C C7 | -0.2190138 | 1.0410760  | -1.6602688 |
| 13 O O2 | -1.2669478 | 1.6552306  | -1.7114256 |
| 14 O O3 | 0.7078642  | 1.0543694  | -2.6485952 |
| 15 C C8 | 0.3693540  | 1.8522579  | -3.7929022 |
| 16 H H3 | 1.2024448  | 1.7372158  | -4.4868972 |
| 17 H H4 | 0.2476541  | 2.9011807  | -3.5085135 |
| 18 H H6 | -0.5612263 | 1.4990010  | -4.2454338 |

## piperonyl

## Cartesian Coordinates (Angstroms)

| Atom     | X          | Y          | Z          |
|----------|------------|------------|------------|
| 1 H H1   | -0.3968724 | 1.5543129  | -1.3560687 |
| 2 C C1   | -0.2192789 | 1.5267201  | -0.2859382 |
| 3 C C4   | 0.2450682  | 1.4866853  | 2.5233457  |
| 4 C C2   | 0.0211857  | 0.2990016  | 0.3837331  |
| 5 C C6   | -0.2191316 | 2.6804777  | 0.4651621  |
| 6 C C5   | 0.0089855  | 2.6658740  | 1.8389725  |
| 7 C C3   | 0.2470043  | 0.3044367  | 1.7726828  |
| 8 H H3   | 0.4295927  | -0.6324651 | 2.2881308  |
| 9 H H4   | 0.4213928  | 1.4824670  | 3.5934008  |
| 10 C C7  | 0.0240148  | -0.9245584 | -0.4176954 |
| 11 H H7  | -0.1664618 | -0.7832148 | -1.4795257 |
| 12 C C8  | 0.2353728  | -2.1861381 | 0.0068761  |
| 13 H H8  | 0.4339741  | -2.4278969 | 1.0460958  |
| 14 C C9  | 0.2267218  | -3.3702372 | -0.8687748 |
| 15 O O1  | -0.0136184 | -3.0745762 | -2.1734061 |
| 16 O O2  | 0.4168139  | -4.5054560 | -0.4720569 |
| 17 C C10 | -0.0228284 | -4.2012089 | -3.0594418 |
| 18 H H2  | -0.8102129 | -4.9071183 | -2.7801998 |
| 19 H H9  | 0.9393850  | -4.7202783 | -3.0349791 |
| 20 H H10 | -0.2118046 | -3.7914998 | -4.0526112 |
| 21 O O3  | -0.4233879 | 3.9719759  | 0.0435385  |
| 22 O O4  | -0.0403356 | 3.9417654  | 2.3335158  |
| 23 C C11 | -0.3280039 | 4.7920731  | 1.2135373  |
| 24 H H11 | 0.4857080  | 5.5156442  | 1.0892889  |
| 25 H H12 | -1.2832833 | 5.3032144  | 1.3824176  |

## Ethyl cinnamate

## Cartesian Coordinates (Angstroms)

| Atom     | X          | Y          | Z          |
|----------|------------|------------|------------|
| 1 H H1   | 0.8094665  | 2.1829020  | -1.8821796 |
| 2 C C1   | 0.6152364  | 2.3709243  | -0.8290218 |
| 3 C C4   | 0.1166399  | 2.8516511  | 1.8674978  |
| 4 C C2   | 0.2366564  | 1.2981348  | -0.0015361 |
| 5 C C6   | 0.7431351  | 3.6617944  | -0.3205155 |
| 6 C C5   | 0.4946944  | 3.9069062  | 1.0304224  |
| 7 C C3   | -0.0111336 | 1.5636824  | 1.3593274  |
| 8 H H6   | 1.0367395  | 4.4750189  | -0.9786682 |
| 9 H H5   | 0.5939834  | 4.9120816  | 1.4309070  |
| 10 H H3  | -0.3067116 | 0.7558034  | 2.0222448  |
| 11 H H4  | -0.0787780 | 3.0361425  | 2.9204475  |
| 12 C C7  | 0.1191615  | -0.0348170 | -0.5930555 |
| 13 C C8  | -0.2237237 | -1.1829758 | 0.0195615  |
| 14 H H2  | 0.3360990  | -0.1044686 | -1.6583634 |
| 15 H H7  | -0.4614193 | -1.2461745 | 1.0765785  |
| 16 C C10 | -0.2891713 | -2.4409783 | -0.7496115 |
| 17 O O1  | -0.0614930 | -2.5691224 | -1.9382809 |
| 18 O O2  | -0.6456391 | -3.4745586 | 0.0550586  |
| 19 C C11 | -0.7367231 | -4.7496375 | -0.5948518 |
| 20 H H8  | 0.2257049  | -5.0290876 | -1.0327061 |
| 21 H H11 | -1.4897831 | -4.7263014 | -1.3877804 |
| 22 H H12 | -1.0229413 | -5.4569196 | 0.1845253  |

## 2-furyl

## Cartesian Coordinates (Angstroms)

| Atom    | X          | Y          | Z          |
|---------|------------|------------|------------|
| 1 C C1  | -0.5861778 | -0.0457215 | 0.4069199  |
| 2 H H2  | -1.6046844 | 0.3335817  | 0.3597083  |
| 3 C C2  | 0.2518868  | 0.2643737  | -0.6030869 |
| 4 H H1  | 1.2811268  | -0.0766997 | -0.6246977 |
| 5 C C3  | -0.2679092 | -0.8368358 | 1.5595421  |
| 6 C C4  | -1.0186753 | -1.2156629 | 2.6482011  |
| 7 C C5  | -0.1709988 | -2.0004238 | 3.4831726  |
| 8 C C6  | 1.0370148  | -2.0482303 | 2.8499015  |
| 9 O O1  | 1.0002162  | -1.3521308 | 1.6850159  |
| 10 H H5 | -2.0542990 | -0.9572724 | 2.8216408  |
| 11 H H8 | -0.4226338 | -2.4661278 | 4.4255788  |
| 12 H H9 | 1.9809179  | -2.5160889 | 3.0863099  |
| 13 C C7 | -0.2240321 | 1.0933730  | -1.7233965 |
| 14 O O2 | -1.3455036 | 1.5517945  | -1.8497766 |
| 15 O O3 | 0.7672365  | 1.2943735  | -2.6288477 |
| 16 C C8 | 0.4033583  | 2.0961908  | -3.7604271 |
| 17 H H3 | 1.2990927  | 2.1540682  | -4.3800789 |
| 18 H H4 | 0.0919452  | 3.0950270  | -3.4414956 |
| 19 H H6 | -0.4178814 | 1.6324117  | -4.3141840 |

## 2-thiophenyl

## Cartesian Coordinates (Angstroms)

| Atom    | X          | Y          | Z          |
|---------|------------|------------|------------|
| 1 C C1  | -0.4535858 | -0.0243428 | 0.3412620  |
| 2 H H2  | -1.4645077 | 0.3808937  | 0.3148997  |
| 3 C C2  | 0.3535076  | 0.2789904  | -0.6953413 |
| 4 H H1  | 1.3778722  | -0.0748932 | -0.7661434 |
| 5 C C3  | -0.1423379 | -0.8297731 | 1.4961240  |
| 6 C C4  | -0.9971067 | -1.1209763 | 2.5413079  |
| 7 C C5  | -0.4150242 | -1.9414346 | 3.5445300  |
| 8 C C6  | 0.8834163  | -2.2741323 | 3.2616380  |
| 9 S S1  | 1.4183528  | -1.5900039 | 1.7624876  |
| 10 H H5 | -2.0159633 | -0.7489986 | 2.5761987  |
| 11 H H8 | -0.9355970 | -2.2706286 | 4.4369541  |
| 12 H H9 | 1.5598762  | -2.8829791 | 3.8468853  |
| 13 C C7 | -0.1471378 | 1.1227217  | -1.7944892 |
| 14 O O2 | -1.2619570 | 1.6062332  | -1.8750323 |
| 15 O O3 | 0.8116420  | 1.3030524  | -2.7380140 |
| 16 C C8 | 0.4213655  | 2.1165398  | -3.8527611 |
| 17 H H3 | 1.2929905  | 2.1560024  | -4.5071847 |
| 18 H H4 | 0.1455531  | 3.1209030  | -3.5190446 |
| 19 H H6 | -0.4313588 | 1.6728258  | -4.3742764 |

## 3-Me-2-furyl

## Cartesian Coordinates (Angstroms)

| Atom     | X          | Y          | Z          |
|----------|------------|------------|------------|
| 1 C C1   | -0.1800432 | 0.0010486  | -0.0533776 |
| 2 H H2   | -1.1985498 | -0.0461630 | -0.4326809 |
| 3 C C2   | 0.6580214  | -1.0089582 | -0.3634728 |
| 4 H H1   | 1.6872614  | -1.0305690 | -0.0223994 |
| 5 C C3   | 0.1382254  | 1.1536708  | 0.7377366  |
| 6 C C4   | -0.6125407 | 2.2423298  | 1.1165637  |
| 7 C C5   | 0.2351358  | 3.0773013  | 1.9013247  |
| 8 C C6   | 1.4431494  | 2.4440302  | 1.9491312  |
| 9 O O1   | 1.4063508  | 1.2791446  | 1.2530316  |
| 10 H H8  | -0.0164993 | 4.0197075  | 2.3670287  |
| 11 H H9  | 2.3870525  | 2.6804386  | 2.4169897  |
| 12 C C7  | 0.1821025  | -2.1292679 | -1.1924721 |
| 13 O O2  | -0.9393690 | -2.2556479 | -1.6508937 |
| 14 O O3  | 1.1733711  | -3.0347191 | -1.3934727 |
| 15 C C8  | 0.8094929  | -4.1662985 | -2.1952900 |
| 16 H H3  | 1.7052273  | -4.7859503 | -2.2531674 |
| 17 H H4  | 0.4980798  | -3.8473669 | -3.1941262 |
| 18 H H6  | -0.0117468 | -4.7200553 | -1.7315109 |
| 19 C C9  | -2.0787718 | 2.4878848  | 0.7507357  |
| 20 H H5  | -2.1312767 | 3.0980072  | -0.1582252 |
| 21 H H7  | -2.5773364 | 3.0137329  | 1.5730088  |
| 22 H H10 | -2.5773364 | 1.5276999  | 0.5755379  |

## N-Boc-2-pyrrolyl

## Cartesian Coordinates (Angstroms)

| Atom     | X          | Y          | Z          |
|----------|------------|------------|------------|
| 1 C C1   | 1.2835003  | 0.0246371  | -0.8176050 |
| 2 H H2   | 0.4573820  | 0.6022074  | -0.4253786 |
| 3 C C2   | 1.6434672  | 0.2773757  | -2.0940092 |
| 4 H H1   | 2.4366695  | -0.2564087 | -2.6077389 |
| 5 C C3   | 1.9067766  | -0.9304564 | 0.0646007  |
| 6 C C4   | 3.1300951  | -1.5680919 | -0.0617223 |
| 7 C C5   | 3.3727855  | -2.3355217 | 1.1068869  |
| 8 C C6   | 2.3000683  | -2.1602396 | 1.9417346  |
| 9 N N1   | 1.3927693  | -1.3112357 | 1.3275764  |
| 10 H H5  | 3.7966605  | -1.4526068 | -0.9059462 |
| 11 H H8  | 4.2415600  | -2.9448850 | 1.3147515  |
| 12 H H9  | 2.0707186  | -2.5626340 | 2.9152865  |
| 13 C C7  | 0.9274185  | 1.3158813  | -2.8498912 |
| 14 O O2  | 0.0024641  | 1.9983814  | -2.4411995 |
| 15 O O3  | 1.4288196  | 1.4302126  | -4.1074914 |
| 16 C C8  | 0.7931884  | 2.4165788  | -4.9300804 |
| 17 H H3  | 1.3037365  | 2.3698145  | -5.8929337 |
| 18 H H4  | 0.8961602  | 3.4127238  | -4.4900456 |
| 19 H H6  | -0.2711004 | 2.1941355  | -5.0492187 |
| 20 C C9  | 0.1569124  | -1.0315429 | 1.9667199  |
| 21 O O1  | -0.0304055 | -1.3261031 | 3.1276429  |
| 22 O O4  | -0.7017898 | -0.4573704 | 1.1277316  |
| 23 C C10 | -2.0430104 | 0.0056071  | 1.5781028  |
| 24 C C11 | -1.8692816 | 1.0950983  | 2.6378016  |
| 25 H H7  | -1.3961684 | 0.7013709  | 3.5394425  |
| 26 H H12 | -2.8524620 | 1.4962416  | 2.9074989  |
| 27 H H13 | -1.2634745 | 1.9190589  | 2.2458376  |
| 28 C C12 | -2.8591165 | -1.1864860 | 2.0837571  |
| 29 H H10 | -2.4441450 | -1.5982818 | 3.0048652  |
| 30 H H14 | -2.8916951 | -1.9750289 | 1.3241647  |
| 31 H H15 | -3.8873846 | -0.8606490 | 2.2757576  |
| 32 C C13 | -2.6408231 | 0.5700264  | 0.2877880  |
| 33 H H11 | -2.0110335 | 1.3598982  | -0.1330557 |
| 34 H H16 | -3.6325881 | 0.9862970  | 0.4928455  |
| 35 H H17 | -2.7466742 | -0.2180043 | -0.4644761 |

## Baldwin VCP INT (8b)

|   |           |           |           |
|---|-----------|-----------|-----------|
| H | 1.442750  | 0.921698  | -1.239800 |
| C | 1.174223  | 1.088619  | -0.199764 |
| C | -0.205397 | 1.594368  | 0.105723  |
| C | 0.151197  | 0.149790  | 0.419148  |
| H | 2.000646  | 1.417717  | 0.424305  |
| H | -0.883108 | 1.775465  | -0.724784 |
| H | -0.338621 | 2.274416  | 0.942683  |
| H | 0.296804  | -0.086999 | 1.471332  |
| C | -0.430333 | -0.944346 | -0.387160 |
| H | -0.576162 | -0.721840 | -1.446325 |
| C | -0.778212 | -2.146752 | 0.078483  |

|   |           |           |           |
|---|-----------|-----------|-----------|
| H | -1.202504 | -2.908299 | -0.569397 |
| H | -0.651283 | -2.413837 | 1.125558  |

Baldwin VCPR TS

|   |           |           |           |
|---|-----------|-----------|-----------|
| C | -0.215191 | 1.190052  | -0.227090 |
| C | -1.349112 | 0.421866  | -0.217252 |
| C | -1.386915 | -0.875798 | 0.339664  |
| C | 1.093057  | 0.583636  | 0.232001  |
| C | 1.230186  | -0.836001 | -0.253629 |
| H | -0.232714 | 2.211810  | -0.596753 |
| H | -2.244410 | 0.795796  | -0.714968 |
| H | -0.751599 | -1.161244 | 1.168910  |
| H | 1.069204  | -1.040072 | -1.308078 |
| H | 1.867359  | -1.532357 | 0.287554  |
| H | 1.931023  | 1.206053  | -0.128602 |
| H | 1.174797  | 0.603886  | 1.332791  |
| H | -2.185686 | -1.567628 | 0.085453  |

### [3,3]-Mechanism Searching (S-TS6)

[3,3] Transoid Triplet Transition State

Spartan'10: G = -852.420461, iv = i613, S<sup>2</sup> = 2.0177

[3,3] Transoid Diradicaloid

Spartan'10: G = -852.445602, iv = i552, S<sup>2</sup> = 0.6134

[3,3] Transoid Closed Shell

Spartan'10: G = -852.435275, iv = i67

Cartesian Coordinates (Angstroms)

| Atom     | X          | Y          | Z          |
|----------|------------|------------|------------|
| 1 C C    | 2.3374563  | 0.3330489  | -2.1080915 |
| 2 F F    | 2.4256384  | -0.9115264 | -2.7529639 |
| 3 F F3   | 3.4032088  | 1.0617736  | -2.6006786 |
| 4 C C4   | 2.5657165  | 0.1320971  | -0.6505621 |
| 5 H H    | 3.5622940  | 0.3928016  | -0.3080310 |
| 6 C C6   | 1.0789034  | 0.9809830  | -2.6058204 |
| 7 H H7   | 1.1643354  | 1.2641873  | -3.6525420 |
| 8 C C8   | -0.0983823 | 1.1552714  | -1.9821114 |
| 9 H H9   | -0.9281032 | 1.5043633  | -2.5947118 |
| 10 C C10 | -0.4496947 | 0.8566367  | -0.5843182 |
| 11 H H11 | 0.0756405  | 1.4190667  | 0.1825713  |
| 12 C C12 | -1.9129894 | 0.7750143  | -0.3343334 |
| 13 O O   | -2.7518708 | 0.4856100  | -1.1684378 |
| 14 O O14 | -2.2070567 | 1.0142512  | 0.9659606  |
| 15 C C15 | -3.5943332 | 0.8855277  | 1.3115032  |
| 16 H H16 | -3.9494122 | -0.1297150 | 1.1106489  |
| 17 H H17 | -4.2020983 | 1.5907992  | 0.7377134  |
| 18 H H18 | -3.6522700 | 1.1081487  | 2.3777128  |
| 19 C C19 | 1.6719391  | -0.5048293 | 0.2540782  |
| 20 C C20 | -0.0900694 | -1.7376610 | 2.1226550  |
| 21 C C21 | 0.3209353  | -0.9075669 | -0.1755517 |
| 22 C C22 | 2.0237697  | -0.6627839 | 1.5896103  |
| 23 C C23 | 1.1433487  | -1.2623996 | 2.5352652  |

|    |   |     |            |            |            |
|----|---|-----|------------|------------|------------|
| 24 | C | C24 | -0.4724439 | -1.6238969 | 0.7762227  |
| 25 | H | H25 | 0.2363543  | -1.2466427 | -1.2060124 |
| 26 | H | H26 | 3.0008465  | -0.3182240 | 1.9195639  |
| 27 | H | H27 | 1.4593765  | -1.3631237 | 3.5690190  |
| 28 | H | H28 | -1.4118475 | -2.0562905 | 0.4427653  |
| 29 | H | H29 | -0.7491923 | -2.2349208 | 2.8288763  |

### S-TS7a

[3,3] Cisoid Triplet Transition State

Spartan'10: G = -852.411611, iv = i538, S<sup>2</sup> = 2.0397

Cartesian Coordinates (Angstroms)

|    | Atom  | X          | Y          | Z          |
|----|-------|------------|------------|------------|
| 1  | C C   | 1.6839700  | 1.4112607  | -2.0466638 |
| 2  | F F   | 2.5766738  | 1.4465241  | -3.1009893 |
| 3  | F F3  | 1.4296522  | 2.7520214  | -1.7493923 |
| 4  | C C4  | 2.3582761  | 0.7947560  | -0.8570935 |
| 5  | H H   | 3.2596855  | 1.2951852  | -0.5073202 |
| 6  | C C6  | 0.4237176  | 0.7233898  | -2.4994167 |
| 7  | H H7  | 0.4089928  | 0.4155717  | -3.5405067 |
| 8  | C C8  | -0.6096278 | 0.4606696  | -1.6793565 |
| 9  | H H9  | -1.4616330 | -0.1043965 | -2.0492272 |
| 10 | C C10 | -0.6553100 | 0.8631396  | -0.2727040 |
| 11 | H H11 | -0.2399756 | 1.8467288  | -0.0730032 |
| 12 | C C12 | -1.9414769 | 0.6218576  | 0.4290469  |
| 13 | O O   | -2.8204701 | -0.1344267 | 0.0639202  |
| 14 | O O14 | -1.9994752 | 1.3246740  | 1.5906512  |
| 15 | C C15 | -3.1948822 | 1.1333352  | 2.3624714  |
| 16 | H H16 | -3.3078673 | 0.0836187  | 2.6482809  |
| 17 | H H17 | -4.0751618 | 1.4390237  | 1.7906988  |
| 18 | H H18 | -3.0761145 | 1.7608966  | 3.2465162  |
| 19 | C C19 | 1.7705130  | -0.3620541 | -0.1613052 |
| 20 | C C20 | 0.4476392  | -2.5605370 | 1.0378059  |
| 21 | C C21 | 2.0701335  | -1.6586126 | -0.5413184 |
| 22 | C C22 | 0.6974892  | -0.1188347 | 0.7983874  |
| 23 | C C23 | 0.1260122  | -1.2833207 | 1.4447133  |
| 24 | C C24 | 1.4172969  | -2.7631849 | 0.0394031  |
| 25 | H H25 | 2.8258561  | -1.8237732 | -1.3048759 |
| 26 | H H26 | 0.8222681  | 0.7481696  | 1.4468545  |
| 27 | H H27 | -0.5881718 | -1.1257393 | 2.2476791  |
| 28 | H H28 | 1.6790043  | -3.7695293 | -0.2736922 |
| 29 | H H29 | -0.0270143 | -3.4164129 | 1.5104359  |

## S-TS7b

[3,3] Cisoid Closed Shell Transition State  
Spartan'10: G = -852.464842, iv = i385

Cartesian Coordinates (Angstroms)

| Atom     | X          | Y          | Z          |
|----------|------------|------------|------------|
| 1 C C    | 1.8306612  | 1.5956508  | -1.8575741 |
| 2 F F    | 2.6870122  | 2.1184195  | -2.7906786 |
| 3 F F3   | 1.8069515  | 2.4827641  | -0.7996484 |
| 4 C C4   | 2.2410148  | 0.2100367  | -1.4905855 |
| 5 H H    | 2.8205396  | -0.2931099 | -2.2601120 |
| 6 C C6   | 0.4929078  | 1.3164800  | -2.4574821 |
| 7 H H7   | 0.5094519  | 1.1703634  | -3.5334670 |
| 8 C C8   | -0.6102237 | 0.9738261  | -1.7309582 |
| 9 H H9   | -1.4344701 | 0.4807224  | -2.2423811 |
| 10 C C10 | -0.7132016 | 1.0783911  | -0.3075953 |
| 11 H H11 | -0.3784892 | 2.0027709  | 0.1423622  |
| 12 C C12 | -1.9631461 | 0.5379098  | 0.2891657  |
| 13 O O   | -2.7047621 | -0.2721485 | -0.2306949 |
| 14 O O14 | -2.1783377 | 1.0574306  | 1.5250633  |
| 15 C C15 | -3.3528503 | 0.5724078  | 2.1939135  |
| 16 H H16 | -3.3040250 | -0.5128555 | 2.3185646  |
| 17 H H17 | -4.2514107 | 0.8221237  | 1.6232500  |
| 18 H H18 | -3.3648593 | 1.0714663  | 3.1636692  |
| 19 C C19 | 1.7137344  | -0.5284032 | -0.4510369 |
| 20 C C20 | 0.5579043  | -2.1472863 | 1.5830749  |
| 21 C C21 | 1.8689793  | -1.9623226 | -0.4539682 |
| 22 C C22 | 0.8996587  | 0.0751830  | 0.6064962  |
| 23 C C23 | 0.3968822  | -0.7962414 | 1.6475472  |
| 24 C C24 | 1.3030441  | -2.7412087 | 0.5104419  |
| 25 H H25 | 2.4373971  | -2.4126343 | -1.2642251 |
| 26 H H26 | 1.2378510  | 1.0456992  | 0.9401489  |
| 27 H H27 | -0.1236510 | -0.3391174 | 2.4835210  |
| 28 H H28 | 1.4204899  | -3.8209299 | 0.4779126  |
| 29 H H29 | 0.1549463  | -2.7853874 | 2.3652758  |

### [3,3]-Methodology Screening

#### Divinyl Species VCP INT (S22)

Spartan'10: B3LYP/6-31G\*, G = -272.648654, iv = none  
Gaussian'09: B3LYP/6-31G\*, G = -272.569679, iv = none  
M06-2X/6-31G\*, G = -272.431421, iv = none

Cartesian Coordinates (Angstroms)

| Atom    | X          | Y          | Z          |
|---------|------------|------------|------------|
| 1 C C1  | 1.6922994  | 0.1392844  | 0.1378774  |
| 2 C C2  | 0.3988567  | 0.7574908  | 0.6151673  |
| 3 C C3  | 0.5377290  | -0.7716186 | 0.4834085  |
| 4 H H6  | 0.6119170  | -1.2877553 | 1.4356786  |
| 5 C C10 | -0.1664634 | -1.5377762 | -0.5636591 |
| 6 H H11 | -0.2166977 | -1.0847065 | -1.5512695 |

|    |   |     |            |            |            |
|----|---|-----|------------|------------|------------|
| 7  | C | C11 | -0.7243985 | -2.7353400 | -0.3801304 |
| 8  | H | H12 | -0.7005566 | -3.2348517 | 0.5837612  |
| 9  | H | H2  | 0.3943943  | 1.1086332  | 1.6424865  |
| 10 | H | H8  | 2.5494545  | 0.1604584  | 0.8004636  |
| 11 | H | H9  | 1.9359198  | 0.2523124  | -0.9131092 |
| 12 | H | H15 | -1.2222093 | -3.2567650 | -1.1892550 |
| 13 | C | C4  | -0.4449305 | 1.5535815  | -0.2977803 |
| 14 | C | C6  | -1.1908461 | 2.5945287  | 0.0754445  |
| 15 | H | H1  | -1.2316971 | 2.9258508  | 1.1086497  |
| 16 | H | H13 | -1.7851697 | 3.1497837  | -0.6406867 |
| 17 | H | H17 | -0.4376017 | 1.2668891  | -1.3470473 |

### Divinyl Species [3,3]-TS (S-TS8)

Spartan'10: B3LYP/6-31G\*, G = -272.536339, iv = i434

Gaussian'09: B3LYP/6-31G\*, G = -272.53598, iv = i419

M06-2X/6-31G\*, G = -272.394561, iv = i518

Cartesian Coordinates (Angstroms)

| Atom     | X          | Y          | Z          |
|----------|------------|------------|------------|
| -----    | -----      | -----      | -----      |
| 1 C C1   | -1.3141431 | 0.0858792  | 1.1956138  |
| 2 H H3   | -1.5218186 | -0.9575706 | 0.9960566  |
| 3 C C2   | -0.0291084 | 0.4926157  | 1.5187609  |
| 4 C C5   | -0.0356607 | 0.6217441  | -1.4704223 |
| 5 H H7   | 0.0907939  | 1.6082371  | -1.9169345 |
| 6 C C6   | -1.3218653 | 0.1955604  | -1.1769583 |
| 7 H H6   | -1.5372630 | -0.8597391 | -1.0695242 |
| 8 C C3   | 1.1243576  | 0.0005740  | -0.9981933 |
| 9 C C4   | 1.1294915  | -0.0825547 | 0.9885817  |
| 10 C C11 | 1.1450748  | -1.1596204 | -0.0516523 |
| 11 H H2  | 2.0898886  | 0.4141807  | -1.2762521 |
| 12 H H10 | 2.0959052  | 0.3084491  | 1.2937960  |
| 13 H H17 | -2.1701876 | 0.8034414  | -1.4793252 |
| 14 H H21 | 0.2677384  | -1.8068587 | -0.0775966 |
| 15 H H22 | 2.0565693  | -1.7585354 | -0.0796222 |
| 16 H H1  | -2.1655803 | 0.6564818  | 1.5562745  |
| 17 H H11 | 0.0958078  | 1.4377156  | 2.0473972  |

### Furan basic alkene INT [3,3] (S23)

Spartan'10: B3LYP/6-31G\*, G = -423.988081, iv = none

Gaussian'09: B3LYP/6-31G\*, G = -423.990183, iv = none

M06-2X/6-31G\*, G = -423.804524, iv = none

Cartesian Coordinates (Angstroms)

| Atom    | X          | Y          | Z          |
|---------|------------|------------|------------|
| -----   | -----      | -----      | -----      |
| 1 C C1  | 2.0211098  | -0.2019559 | -0.2878635 |
| 2 C C2  | 1.0455931  | 0.5679385  | 0.5563511  |
| 3 C C3  | 1.1811074  | -0.9579600 | 0.7227411  |
| 4 H H6  | 1.6950687  | -1.2655714 | 1.6311662  |
| 5 C C10 | 0.1137728  | -1.8791687 | 0.2796023  |
| 6 H H11 | -0.4504758 | -1.5718682 | -0.6005445 |



|    |   |     |            |            |            |
|----|---|-----|------------|------------|------------|
| 7  | C | C11 | -0.1862803 | -3.0316599 | 0.8841588  |
| 8  | H | H12 | 0.3516805  | -3.3717411 | 1.7665564  |
| 9  | C | C4  | -0.1463955 | 1.1835360  | -0.0514472 |
| 10 | C | C5  | -0.5099529 | 1.5057073  | -1.3288209 |
| 11 | C | C6  | -1.8161123 | 2.0934018  | -1.2526201 |
| 12 | C | C7  | -2.1512630 | 2.0926024  | 0.0654157  |
| 13 | H | H1  | 0.0865861  | 1.3586969  | -2.2183691 |
| 14 | H | H8  | -2.4149282 | 2.4695347  | -2.0705875 |
| 15 | H | H9  | -3.0151894 | 2.4311237  | 0.6170684  |
| 16 | O | O3  | -1.1518294 | 1.5413520  | 0.8119593  |
| 17 | H | H2  | 1.4658002  | 1.1388947  | 1.3828715  |
| 18 | H | H3  | 3.0821058  | -0.0798072 | -0.0895872 |
| 19 | H | H4  | 1.7797895  | -0.3460992 | -1.3375905 |
| 20 | H | H7  | -0.9801871 | -3.6769564 | 0.5195397  |

### Furan basic alkene TS [3,3] (S-TS10)

Spartan'10: B3LYP/6-31G\*, G = -423.948929, iv = i375

Gaussian'09: B3LYP/6-31G\*, G = -423.94862, iv = i364

M06-2X/6-31G\*,G = -423.804524, iv = i501

Cartesian Coordinates (Angstroms)

|    | Atom | X   | Y          | Z          |            |
|----|------|-----|------------|------------|------------|
| 1  | C    | C1  | -1.0283397 | -0.4010231 | 0.7571931  |
| 2  | H    | H3  | -1.3288846 | -1.4018108 | 0.4822254  |
| 3  | C    | C2  | 0.3149653  | -0.0843233 | 1.1143534  |
| 4  | C    | C5  | 0.1806775  | 0.5851929  | -1.8049434 |
| 5  | H    | H7  | 0.1886549  | 1.6298365  | -2.1155432 |
| 6  | C    | C6  | -1.0478457 | -0.0056010 | -1.4914104 |
| 7  | H    | H6  | -1.1562864 | -1.0802117 | -1.5818701 |
| 8  | C    | C3  | 1.4061193  | -0.0015796 | -1.5255067 |
| 9  | C    | C4  | 1.5056262  | -0.4561222 | 0.5381058  |
| 10 | C    | C11 | 1.5647472  | -1.2614028 | -0.7289562 |
| 11 | H    | H2  | 2.3179841  | 0.5447544  | -1.7517164 |
| 12 | H    | H10 | 2.4243494  | -0.0184088 | 0.9139063  |
| 13 | O    | O3  | 0.3046054  | 0.9591443  | 2.0340899  |
| 14 | C    | C8  | -1.0061254 | 1.2405430  | 2.2973044  |
| 15 | H    | H12 | -1.1694267 | 2.0232775  | 3.0244229  |
| 16 | C    | C7  | -1.8501102 | 0.4577518  | 1.5881914  |
| 17 | H    | H11 | -2.9302458 | 0.4734522  | 1.6347546  |
| 18 | H    | H8  | -1.9647426 | 0.5515984  | -1.6637485 |
| 19 | H    | H13 | 0.7543954  | -1.9858727 | -0.8430314 |
| 20 | H    | H14 | 2.5198825  | -1.7691948 | -0.8778209 |

### Thiophene basic alkene INT [3,3] (S24)

Spartan'10: B3LYP/6-31G\*, G = -746.970146, iv = none

Gaussian'09: B3LYP/6-31G\*, G = -746.972369, iv = none

M06-2X/6-31G\*,G = -746.779248, iv = none

## Cartesian Coordinates (Angstroms)

| Atom    | X          | Y          | Z          |
|---------|------------|------------|------------|
| 1 C C1  | 2.0342002  | -0.2274222 | -0.0893840 |
| 2 C C2  | 1.0083838  | 0.5175287  | 0.7205973  |
| 3 C C3  | 1.1438292  | -1.0097873 | 0.8564552  |
| 4 H H6  | 1.6098827  | -1.3407959 | 1.7825414  |
| 5 C C10 | 0.1071938  | -1.9243166 | 0.3331753  |
| 6 H H11 | -0.4024356 | -1.6036092 | -0.5748702 |
| 7 C C11 | -0.2265279 | -3.0867859 | 0.9001834  |
| 8 H H12 | 0.2573181  | -3.4399102 | 1.8085163  |
| 9 C C4  | -0.1614673 | 1.1537212  | 0.0676524  |
| 10 C C5 | -0.3028157 | 1.5991983  | -1.2219863 |
| 11 C C6 | -1.5793267 | 2.1816071  | -1.4925050 |
| 12 C C7 | -2.4031674 | 2.1789389  | -0.4026654 |
| 13 H H1 | 0.4935970  | 1.5255504  | -1.9551030 |
| 14 H H8 | -1.8643257 | 2.5889943  | -2.4567860 |
| 15 H H9 | -3.4137035 | 2.5570230  | -0.3227241 |
| 16 S S1 | -1.6333832 | 1.4513366  | 0.9735079  |
| 17 H H2 | 1.3955547  | 1.0633116  | 1.5801496  |
| 18 H H3 | 3.0826091  | -0.1075179 | 0.1690450  |
| 19 H H4 | 1.8493969  | -0.3496373 | -1.1530430 |
| 20 H H7 | -0.9948125 | -3.7274275 | 0.4772432  |

**Thiophene basic alkene TS [3,3] (S-TS11)**

Spartan'10: B3LYP/6-31G\*, G = -746.930649, iv = i388

Gaussian'09: B3LYP/6-31G\*, G = -746.93057, iv = i390

M06-2X/6-31G\*,G = -746.731749, iv = i513

## Cartesian Coordinates (Angstroms)

| Atom     | X          | Y          | Z          |
|----------|------------|------------|------------|
| 1 C C1   | -0.9189548 | -0.4240114 | 0.7504790  |
| 2 H H3   | -1.1147122 | -1.4402266 | 0.4318292  |
| 3 C C2   | 0.4086231  | -0.0557975 | 1.1303085  |
| 4 C C5   | 0.2563491  | 0.6375349  | -1.7780825 |
| 5 H H7   | 0.2835947  | 1.6895231  | -2.0613975 |
| 6 C C6   | -0.9818885 | 0.0654255  | -1.4649227 |
| 7 H H6   | -1.1223033 | -1.0004326 | -1.6017383 |
| 8 C C3   | 1.4714917  | 0.0183867  | -1.5254622 |
| 9 C C4   | 1.5815088  | -0.4486707 | 0.5176155  |
| 10 C C11 | 1.6126170  | -1.2567297 | -0.7494393 |
| 11 H H2  | 2.3922651  | 0.5471979  | -1.7569661 |
| 12 H H10 | 2.5296780  | -0.0491525 | 0.8658829  |
| 13 S S1  | 0.3554048  | 1.2920013  | 2.2966335  |
| 14 C C8  | -1.3938788 | 1.2278275  | 2.3506109  |
| 15 H H12 | -1.9282369 | 1.8907785  | 3.0194038  |
| 16 C C7  | -1.9142747 | 0.2946522  | 1.5169151  |
| 17 H H11 | -2.9785961 | 0.0998604  | 1.4329914  |
| 18 H H8  | -1.8852902 | 0.6542682  | -1.5999269 |
| 19 H H13 | 0.7880972  | -1.9646036 | -0.8631282 |
| 20 H H14 | 2.5585060  | -1.7778317 | -0.9116061 |

## Non-fluoro Pip cis (S25)

Spartan'10: B3LYP/6-31G\*, G = -842.539706, iv = none

Gaussian'09: B3LYP/6-31G\*, G = -842.546027, iv = none

M06-2X/6-31G\*, G = -842.201221, iv = none

### Cartesian Coordinates (Angstroms)

| Atom     | X          | Y          | Z          |
|----------|------------|------------|------------|
| 1 C C1   | 3.0422011  | -0.2059109 | 0.8333341  |
| 2 C C2   | 1.9462495  | 0.6301462  | 1.4123946  |
| 3 C C3   | 1.7915637  | -0.9034859 | 1.3561728  |
| 4 H H6   | 1.8915419  | -1.4139110 | 2.3115219  |
| 5 C C10  | 0.8668632  | -1.5315163 | 0.4062663  |
| 6 H H11  | 0.7192598  | -1.0383017 | -0.5535636 |
| 7 C C11  | 0.1896422  | -2.6696412 | 0.6288198  |
| 8 H H12  | 0.2760755  | -3.2240637 | 1.5592409  |
| 9 C C12  | -0.7076642 | -3.2212370 | -0.4038901 |
| 10 O O1  | -0.9249719 | -2.7396061 | -1.5003832 |
| 11 O O2  | -1.2831356 | -4.3747921 | 0.0257938  |
| 12 C C13 | -2.1743954 | -4.9936572 | -0.9108810 |
| 13 H H5  | -3.0200563 | -4.3360514 | -1.1326643 |
| 14 H H13 | -2.5192305 | -5.9092198 | -0.4284011 |
| 15 H H14 | -1.6551503 | -5.2236293 | -1.8455651 |
| 16 C C4  | 1.0978825  | 1.5520209  | 0.5894276  |
| 17 C C5  | 0.7952224  | 3.0268768  | -1.3505680 |
| 18 C C6  | -0.9677564 | 2.7108075  | 0.2779478  |
| 19 C C7  | -0.4784712 | 3.2893029  | -0.8931402 |
| 20 C C9  | 1.5781117  | 2.1438437  | -0.5822917 |
| 21 H H1  | 1.1760331  | 3.4839111  | -2.2574735 |
| 22 H H4  | 2.5895542  | 1.9257801  | -0.9106321 |
| 23 C C8  | -0.2120485 | 1.8458768  | 1.0381704  |
| 24 H H2  | 2.1242673  | 0.9867590  | 2.4267254  |
| 25 H H3  | -0.6104691 | 1.3989510  | 1.9432289  |
| 26 O O3  | -2.2450646 | 3.1618447  | 0.5151643  |
| 27 O O4  | -1.4305404 | 4.1247672  | -1.4279509 |
| 28 C C14 | -2.6158043 | 3.8916840  | -0.6597057 |
| 29 H H7  | -3.0544472 | 4.8499658  | -0.3687754 |
| 30 H H10 | -3.3255377 | 3.2962697  | -1.2517681 |
| 31 H H8  | 3.9619561  | -0.3310041 | 1.3976659  |
| 32 H H9  | 3.1783192  | -0.2027794 | -0.2442203 |

## Non-fluoro Pip cis [3,3] TS (S-TS12)

Spartan'10: B3LYP/6-31G\*, G = -842.491477, iv = i374

Gaussian'09: B3LYP/6-31G\*, G = -842.495343, iv = i369

M06-2X/6-31G\*, G = -842.148309, iv = i487

### Cartesian Coordinates (Angstroms)

| Atom   | X          | Y          | Z          |
|--------|------------|------------|------------|
| 1 C C1 | 0.0520814  | -0.9917968 | 0.5259498  |
| 2 H H3 | -0.0680629 | -2.0610640 | 0.3911571  |
| 3 C C2 | 1.3793483  | -0.5890499 | 1.0005366  |
| 4 C C5 | 1.3946502  | -0.4550237 | -2.0184814 |
| 5 H H7 | 1.4907740  | 0.4909212  | -2.5477833 |
| 6 C C6 | 0.0803486  | -0.8195318 | -1.5814762 |

|    |   |     |            |            |            |
|----|---|-----|------------|------------|------------|
| 7  | H | H6  | -0.2016633 | -1.8639056 | -1.6606524 |
| 8  | C | C7  | 1.5052318  | 0.5844828  | 1.8403494  |
| 9  | H | H4  | 2.4855943  | 0.9358776  | 2.1449348  |
| 10 | C | C8  | 0.3724354  | 1.2214879  | 2.2165992  |
| 11 | C | C9  | -0.9278742 | 0.7683988  | 1.8341607  |
| 12 | C | C10 | -1.1222078 | -0.3267477 | 1.0639775  |
| 13 | H | H12 | -2.1142224 | -0.6851961 | 0.8171351  |
| 14 | C | C3  | 2.5223390  | -1.1324057 | -1.6537495 |
| 15 | C | C4  | 2.5117020  | -1.2325879 | 0.5429250  |
| 16 | C | C11 | 2.5316142  | -2.2105191 | -0.5981357 |
| 17 | H | H2  | 3.4917592  | -0.7607891 | -1.9772189 |
| 18 | H | H10 | 3.4793786  | -0.8679440 | 0.8810774  |
| 19 | C | C12 | -1.0121538 | 0.1108352  | -1.9457873 |
| 20 | O | O1  | -0.8861163 | 1.2902719  | -2.2159820 |
| 21 | O | O2  | -2.2234775 | -0.5100299 | -1.9038794 |
| 22 | C | C13 | -3.3475585 | 0.3342121  | -2.1883485 |
| 23 | H | H1  | -3.2619765 | 0.7689444  | -3.1882166 |
| 24 | H | H5  | -3.4161761 | 1.1444830  | -1.4567240 |
| 25 | H | H8  | -4.2243907 | -0.3122520 | -2.1268798 |
| 26 | O | O3  | -1.8664221 | 1.5764937  | 2.4190921  |
| 27 | O | O4  | 0.2391522  | 2.3310099  | 3.0111647  |
| 28 | C | C14 | -1.1535291 | 2.6447480  | 3.0458727  |
| 29 | H | H9  | -1.3334033 | 3.5774634  | 2.4962941  |
| 30 | H | H13 | -1.4795959 | 2.7345598  | 4.0862811  |
| 31 | H | H11 | 3.4385629  | -2.8191869 | -0.6170676 |
| 32 | H | H14 | 1.6638581  | -2.8761594 | -0.6371249 |
